# Supplementary material for: A panel of induced pluripotent stem cells from chimpanzees: a resource for comparative functional genomics
Source: eLife journal article supplement (doi:10.7554/elife.07103), 2015-06-23

DE genes, chimpanzee-human  
iPSCs, separate normalisation  
(testable n = 4,543)

DE genes, chimpanzee-human  
iPSCs, full model normalisation  
(testable n = 2,671)

110

1982

2561

7,350 genes not DE in either

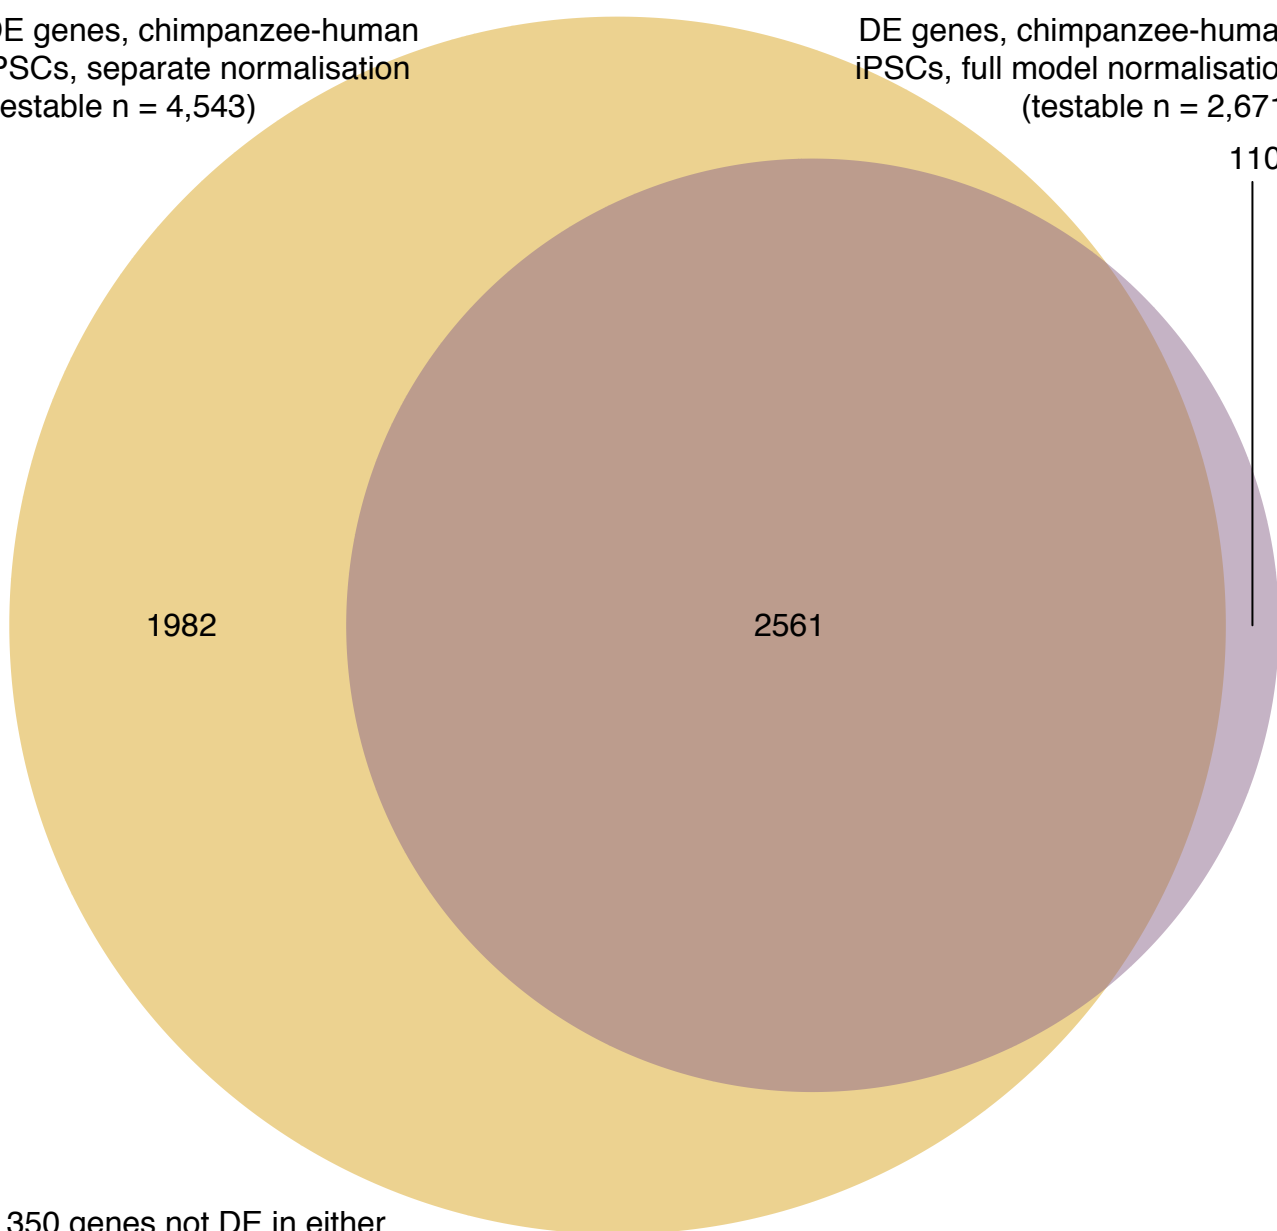

Supplement: supp [file elife-07103-supp-v1.zip]
