# Supplementary material for: A panel of induced pluripotent stem cells from chimpanzees: a resource for comparative functional genomics
Source: eLife journal article supplement (doi:10.7554/elife.07103), 2015-06-23

DM probes, chimpanzee-human iPSCs,  
reduced model (n = 63,791)

DM probes, chimpanzee-human iPSCs,  
full model (n = 31,011)

36310

27481

3530

267,986 probes not DM in either

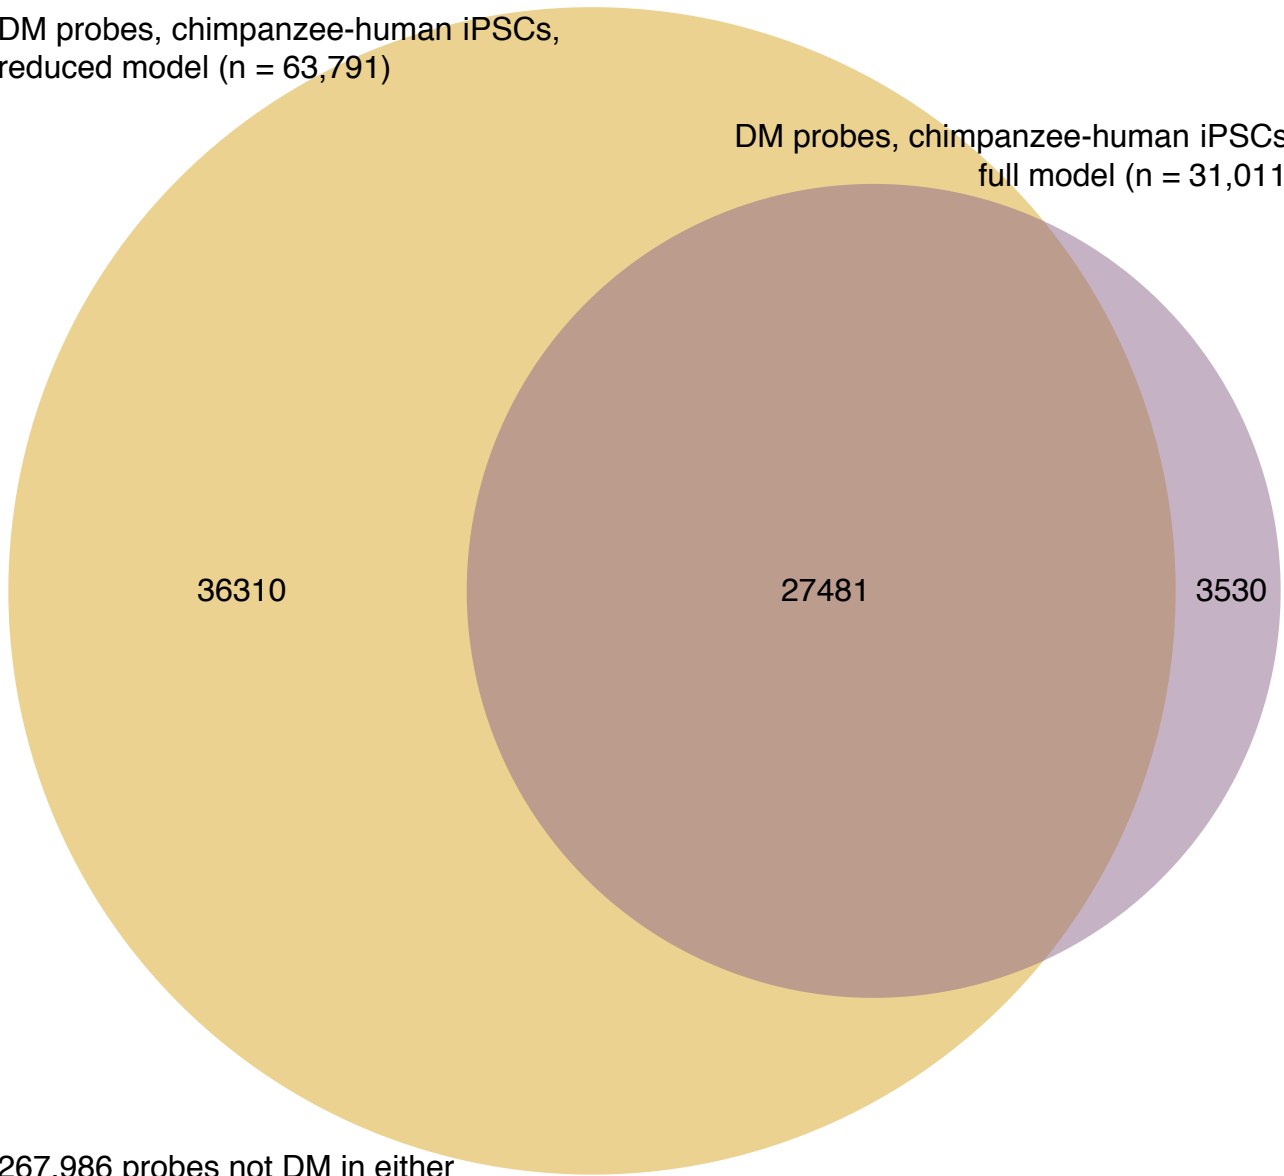

Supplement: supp [file elife-07103-supp-v1.zip]
