# Supplementary material for: A panel of induced pluripotent stem cells from chimpanzees: a resource for comparative functional genomics
Source: eLife journal article supplement (doi:10.7554/elife.07103), 2015-06-23

# Color Key and Histogram

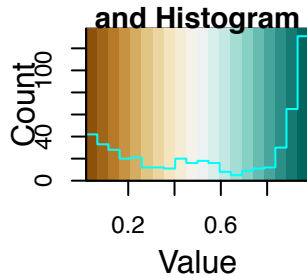

- Chimpanzee iPSCs
- Chimpanzee fibroblasts
- Human iPSCs (present study)
- Human iPSCs (Ziller et al)
- Human ESCs (Ziller et al)
- Human fibroblasts
- Human LCLs

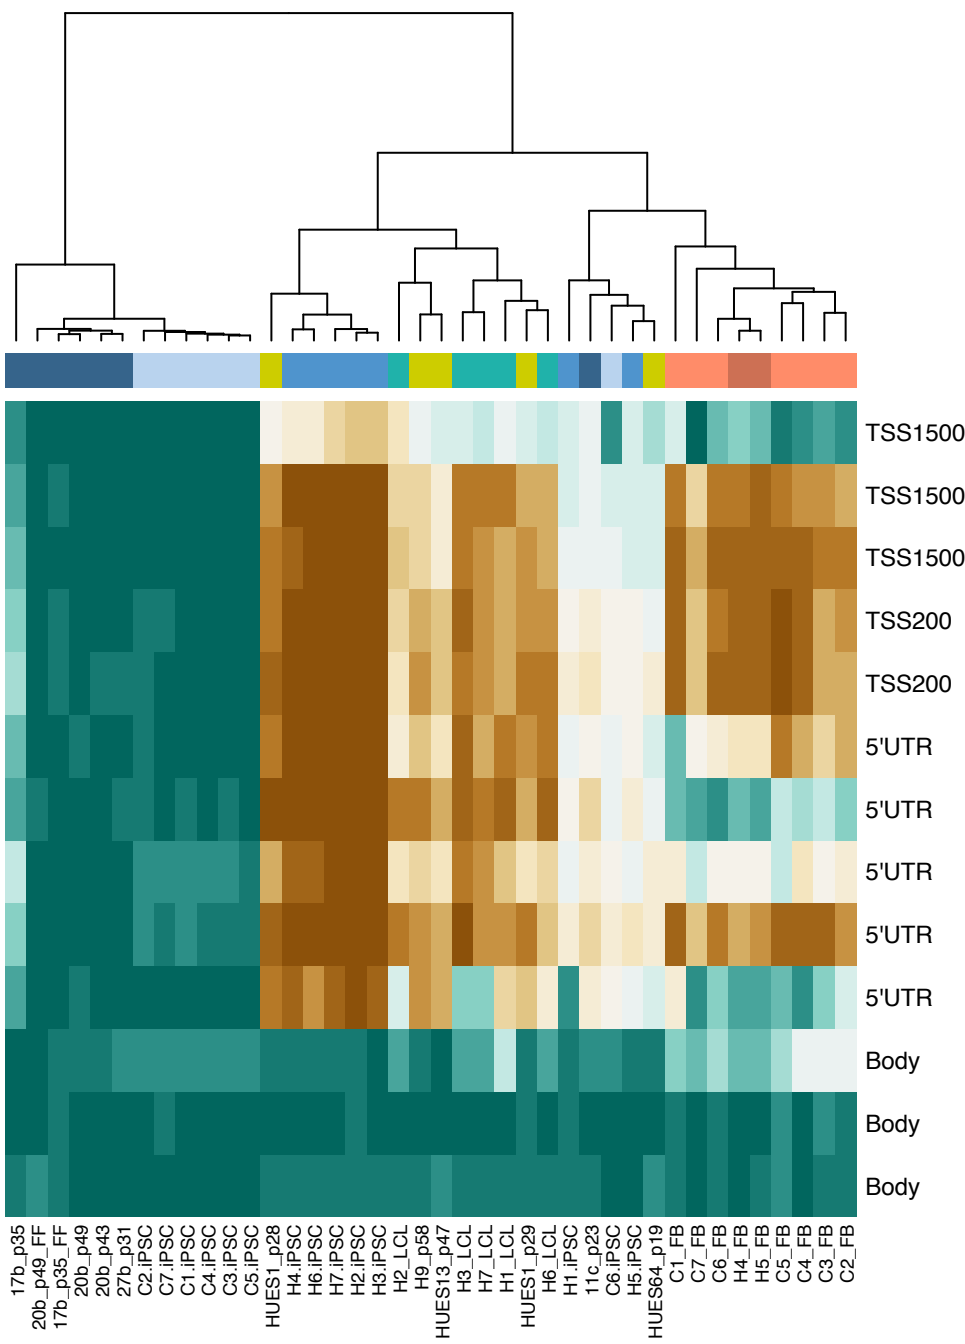

Supplement: supp [file elife-07103-supp-v1.zip]
