# Supplementary material for: A panel of induced pluripotent stem cells from chimpanzees: a resource for comparative functional genomics
Source: eLife journal article supplement (doi:10.7554/elife.07103), 2015-06-23

# Master pluripotency factors

Genes with H3K27ac signal

ESSRB  
KLF2  
KLF4  
KLF5

DAX1

C-MYC  
E2F1  
N-MYC  
NAC1  
NANOG  
NR5A2  
OCT4  
PRDM14  
SALL4  
SMAD1  
SOX2  
STAT3  
TCF3  
RONIN  
ZFP281

REX1  
ZFX

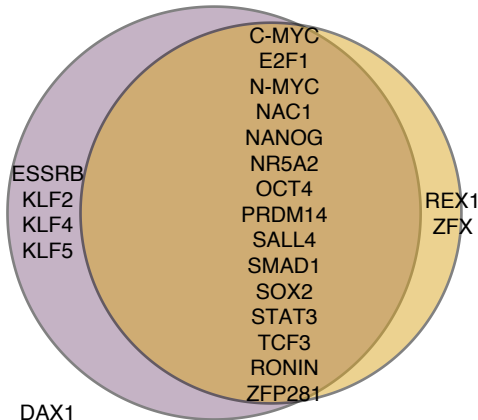

Supplement: supp [file elife-07103-supp-v1.zip]
