# Supplementary material for: A panel of induced pluripotent stem cells from chimpanzees: a resource for comparative functional genomics
Source: eLife journal article supplement (doi:10.7554/elife.07103), 2015-06-23
Supplement: supp [file elife-07103-supp-v1.zip]

Archive with 44 entries (44 files):
- elife_poa_e07103_Video_1.mov
- elife_poa_e07103_Supplementary_File_12.xlsx
- elife_poa_e07103_Figure_6_figure_supplement_4.pdf
- elife_poa_e07103_Supplementary_File_6.txt
- elife_poa_e07103_Figure_7_figure_supplement_7.pdf
- elife_poa_e07103_Figure_4_figure_supplement_1.pdf
- elife_poa_e07103_Figure_5_figure_supplement_3.pdf
- elife_poa_e07103_Figure_6_figure_supplement_2.pdf
- elife_poa_e07103_Figure_7_figure_supplement_1.pdf
- elife_poa_e07103_Figure_1_figure_supplement_5.pdf
- elife_poa_e07103_Figure_2_figure_supplement_2.pdf
- elife_poa_e07103_Supplementary_File_14.txt
- elife_poa_e07103_Supplementary_File_4.txt
- elife_poa_e07103_Figure_7_figure_supplement_5.pdf
- elife_poa_e07103_Supplementary_File_8.txt
- elife_poa_e07103_Figure_1_figure_supplement_1.pdf
- elife_poa_e07103_Supplementary_File_5.txt
- elife_poa_e07103_Supplementary_File_11.xlsx
- elife_poa_e07103_Figure_3_figure_supplement_1.pdf
- elife_poa_e07103_Figure_5_figure_supplement_2.pdf
- elife_poa_e07103_Figure_5_figure_supplement_1.pdf
- elife_poa_e07103_Figure_1_figure_supplement_4.pdf
- elife_poa_e07103_Figure_1_figure_supplement_3.pdf
- elife_poa_e07103_Figure_1_figure_supplement_2.pdf
- elife_poa_e07103_Supplementary_File_13.txt
- elife_poa_e07103_Figure_6_figure_supplement_3.pdf
- elife_poa_e07103_Figure_7_figure_supplement_8.pdf
- elife_poa_e07103_Figure_2_figure_supplement_1.pdf
- elife_poa_e07103_Supplementary_File_3.xlsx
- elife_poa_e07103_Figure_7_figure_supplement_4.pdf
- elife_poa_e07103_Figure_7_figure_supplement_3.pdf
- elife_poa_e07103_Figure_6_figure_supplement_1.pdf
- elife_poa_e07103_Supplementary_File_2.xlsx
- elife_poa_e07103_Supplementary_File_16.xlsx
- elife_poa_e07103_Figure_2_figure_supplement_3.pdf
- elife_poa_e07103_Supplementary_File_15.txt
- elife_poa_e07103_Supplementary_File_7.xlsx
- elife_poa_e07103_Supplementary_File_9.txt
- elife_poa_e07103_Figure_7_figure_supplement_6.pdf
- elife_poa_e07103_Figure_2_figure_supplement_4.pdf
- elife_poa_e07103_Figure_7_figure_supplement_2.pdf
- elife_poa_e07103_Supplementary_File_10.xlsx
- elife_poa_e07103_Figure_4_figure_supplement_2.pdf
- elife_poa_e07103_Supplementary_File_1.xlsx
