# Supplementary material for: A panel of induced pluripotent stem cells from chimpanzees: a resource for comparative functional genomics
Source: eLife journal article supplement (doi:10.7554/elife.07103), 2015-06-23
Supplement: supp [file elife-07103-supp-v1.zip › elife_poa_e07103_Supplementary_File_2.xlsx]

## Sheet: Sheet1
Name	Forward	Reverse	Use	Source of Primer:
GAPDH	ACCAACTGCTTAGCACCCCTGG	ATCACGCCACAGTTTCCCGGAG	Normalizing gene	Designed in house
OCT3/4(CDS)	CCCCAGGGCCCCATTTTGGTACC	ACCTCAGTTTGAATGCATGGGAGAGC	Endogenous qPCR	PMID: 21460823
SOX2 (CDS)	TTCACATGTCCCAGCACTACCAGA	TCACATGTGTGAGAGGGGCAGTGTGC	Endogenous qPCR	PMID: 21460823
KLF4 (CDS)	ACCCATCCTTCCTGCCCGATCAGA	TTGGTAATGGAGCGGCGGGACTTG	Endogenous qPCR	PMID: 21460823
L-MYC (CDS)	GCGAACCCAAGACCCAGGCCTGCTCC	CAGGGGGTCTGCTCGCACCGTGATG	Endogenous qPCR	PMID: 21460823
NANOG_CDR	CAGAAGGCCTCAGCACCTAC	ATTGTTCCAGGTCTGGTTGC	Endogenous qPCR	PMID:18029452
LIN28 (CDS)	AGCCATATGGTAGCCTCATGTCCGC	TCAATTCTGTGCCTCCGGGAGCAGGGTAGG	Endogenous qPCR	PMID: 21460823
OCT3/4 (pla)	CATTCAAACTGAGGTAAGGG	TAGCGTAAAAGGAGCAACATAG	Exogenous qPCR	PMID: 21460823
SOX2(pla)	TTCACATGTCCCAGCACTACCAGA	TTTGTTTGACAGGAGCGACAAT	Exogenous qPCR	PMID: 21460823
KLF4 (pla)	CCACCTCGCCTTACACATGAAGA	TAGCGTAAAAGGAGCAACATAG	Exogenous qPCR	PMID: 21460823
L-MYC (pla)	GGCTGAGAAGAGGATGGCTAC	TTTGTTTGACAGGAGCGACAAT	Exogenous qPCR	PMID: 21460823
EBNA-1	ATCAGGGCCAAGACATAGAGATG	GCCAATGCAACTTGGACGTT	Exogenous qPCR	PMID: 21460823
PCXLE_Common	TTTGCAAGCAGCAGATTACGCGCAG	TTTGCTCACCCAGAAACGCTGGTGAAAG	Genomic PCR Integration	Designed in house
APOBEC3B-E8_F1	TGGGACACCTTTGTGTACCGCC	AGGCCCATCCTTCAGTTTCCCTG	qPCR	Designed in house
PIWIL2	TTGTGGACAGCCTGAAGCTA	CCATCAGACACTCCATCACG	qPCR	PMID: 24153179
OCT3/4 (Retroviral)	CCCCAGGGGATTTTGGTACC	CCCTTTTTCTGGAGACTAAATAAA	Exogenous retroviral qPCR	PMID: 21892153 / PMID: 18035408
SOX2 (Retroviral)	GGCACCCCTGGCATGGCTCTTGGCTC	CCCTTTTTCTGGAGACTAAATAAA	Exogenous retroviral qPCR	PMID: 21892153 / PMID: 18035408
KLF4 (Retroviral)	ACGATCGTGGCCCCGGAAAAGGACC	CCCTTTTTCTGGAGACTAAATAAA	Exogenous retroviral qPCR	PMID: 21892153 / PMID: 18035408
NANOG (Retroviral)	TTTGGAAGCTGCTGGGGAAG	CCCTTTTTCTGGAGACTAAATAAA	Exogenous retroviral qPCR	PMID: 21892153 / PMID: 18035408
L-MYC (Retroviral)	GTGAGTCCCCCACCTGTAGA	GACATGGCCTGCCCGGTTATTATT	Exogenous retroviral qPCR	PMID: 20660764
Cytochrome B	AAAAAGCTTCCATCCAACATCTCAGCATGATGAAA	AAACTGCAGCCCCTCAGAATGATATTTGTCCTCA	Teratoma origin confirmation	PMID: 2762322
12S	AAAAAGCTTCAAACTGGGATTAGATACCCCACTAT	TGACTGCAGAGGGTGACGGGCGGTGTGT	Teratoma origin confirmation	PMID: 2762322
