# Supplementary material for: A panel of induced pluripotent stem cells from chimpanzees: a resource for comparative functional genomics
Source: eLife journal article supplement (doi:10.7554/elife.07103), 2015-06-23
Supplement: supp [file elife-07103-supp-v1.zip › elife_poa_e07103_Supplementary_File_4.txt]

ensembl	C3647	C3649	C3651	C4955	C8861	C40210	C40280	H18489	H19101	H19114	H20961	H28834	Hutt45	Hutt60	logFC	AveExpr	t	P.Value	adj.P.Val	B
ENSG00000000003	5.97061779503049	6.09538534475166	6.12192327876038	6.22803332690409	6.13538396020901	6.03498944591628	6.24197513283521	5.74488242980024	5.32147502540706	5.40598132444224	5.55192540668588	5.40217761976314	5.690894569603	5.40675889732235	0.612089181916915	5.81088596838793	7.74348901560725	7.351078550653e-07	9.87527340397325e-06	5.19445839796308
ENSG00000000419	5.55932174938967	5.66860394925043	5.8418361264373	6.06607667841001	6.17962514773561	5.84647197817114	5.88370553725474	6.57391908657868	6.66514916373	6.57428046929311	6.23052547261204	6.31877946017474	6.21228531171387	6.45359218053278	-0.572575230213719	6.14815516509172	-5.44295640440414	5.03216064145657e-05	0.000281463360143235	0.900559999954281
ENSG00000000457	3.10635932084186	3.10183851202147	3.18426369315472	3.57813534099776	3.34695510040503	3.39092288479542	3.07457939470394	2.49150723969654	2.51562078677598	2.36554024179659	2.19667391233929	2.27155331738507	2.27785154862591	2.51879369884405	0.876268599857839	2.81575678517026	8.12173739306128	3.92622587059151e-07	6.06422526281336e-06	6.22198009694346
ENSG00000000460	4.34677456812768	4.07267983256141	4.11586870705617	4.33614724658344	4.0245783735854	4.15898537249563	4.26581594479561	3.38399146007989	3.57994086831894	3.46883989300187	3.75556651490512	3.7003947985649	4.0359630488282	4.07785521564991	0.476564413820992	3.9516715603253	4.27845590546222	0.000551135400088325	0.00201195829468356	-1.46931368370158
ENSG00000001036	5.42067744109971	5.59366347967837	5.42620874901378	5.49253017339521	5.46435506993514	5.5604855320194	5.50370656859599	6.07057812106561	5.94042277203847	6.05258033492712	5.67926552716912	5.78030644335015	6.17879852228664	5.40953011184993	-0.383277121881473	5.68379348903033	-3.62230420549855	0.00222219550483224	0.00641364512433321	-2.96005138060132
ENSG00000001084	3.81972500778527	3.67572681820807	3.93114822582472	3.8444149323845	3.94429439269482	3.68782499563522	3.83636752356416	4.15517615837318	4.01299405574179	3.99353470371935	4.20582324608931	4.24204427131991	4.33877644270931	4.12075715722691	-0.337066786675674	3.98632913794832	-4.46110628259475	0.000375373121353641	0.0014615055214316	-1.17144891096565
ENSG00000001167	5.29345246332727	4.81033569719745	4.62301733239451	4.74268623434762	4.47204558264737	4.71079297964751	4.75607157877354	4.26627408062956	3.99759558540694	4.32110943103495	4.44746218185933	4.60387986799268	4.30977031166082	4.61357315137091	0.41150614020959	4.56914760559218	3.30481977607219	0.00437026159347183	0.0112835073937517	-3.49079933899841
ENSG00000001460	-2.16172592472567	-0.447021205193053	-1.60943603900359	-0.593005341527991	-0.838163184424144	-0.870709921657693	-1.36882805269896	1.14019774894431	1.750016329224	1.41117076406897	1.64530746363089	1.91251736581178	1.38481737650587	1.74541658805675	-2.68625724161568	0.221468140500818	-11.4887578302725	3.04643052370451e-09	1.45658544395063e-07	11.5106467773754
ENSG00000001461	2.13417789787293	2.09496230666675	2.01889293862399	1.93884769343229	1.93927313180777	1.77659641579136	1.86992931412912	1.56547185486165	1.97856678531051	1.46553005951709	1.90457313359664	1.89684747457894	1.97177479623696	1.7573607632714	0.174402002183469	1.87948604040696	1.66913983950767	0.114131616939664	0.175015233686866	-6.44548555306978
ENSG00000001497	5.76211810472451	5.63190649766451	5.73594962575401	6.08068224968947	5.90806684869584	6.13369077182236	5.88845888682265	6.47060996045859	6.59568895637167	6.3550690249324	6.22627003523368	6.27878760399545	6.20354767389214	6.2527787806025	-0.463398530621479	6.10883035861855	-5.08938675832696	0.000102499289206391	0.000504863961526094	0.0938549300814646
ENSG00000001561	1.53201777183832	1.52489357821066	1.30283993415693	0.755661773641613	1.08715949237656	1.23056752947413	1.05260042877352	1.79923778248113	1.68640356380471	1.67769576794947	0.82086122591623	1.68731560673573	1.04669883394562	1.24209014656887	-0.214812101582769	1.31757453113382	-1.21119552552159	0.243045050220509	0.326685141576995	-6.82745575588111
ENSG00000001617	5.49810417776144	5.73623047469612	5.28892903955836	5.80739807510917	5.18251971380699	6.00958955302222	5.42010802047714	4.82706286538777	5.11641725378105	4.99851843780475	5.35281118472858	4.97547676500644	4.16175566398195	4.82513197903411	0.679185610341343	5.22857522886829	4.18646900552	0.000669337400616438	0.00235993786294979	-1.81158259115279
ENSG00000001629	3.78776705506497	3.85363983270684	3.53582111784242	3.49342201413526	3.76293113135095	3.52081257445936	3.62079214325818	4.2222716391214	4.20892986965071	4.25439521959413	4.25515961788508	4.45067655618003	4.36873437535582	4.29599615323986	-0.64144075721482	3.97366780713179	-8.47959157321108	2.20556175425452e-07	3.89041914652635e-06	6.49398026983418
ENSG00000001630	6.43243367173318	6.06684208750461	5.70821363093974	5.3312265538658	5.38482304934562	4.74893806155442	5.63896248167165	5.27804520309084	5.15303482337989	4.60787905012785	5.27936974911277	5.4660307911805	6.4639103044464	6.39835658025505	0.0814695780264785	5.56843328844345	0.281578085803458	0.781801420868795	0.833652102102164	-7.84026578201542
ENSG00000001631	3.54856970932611	3.25446728709232	3.19407561472639	3.15724884882118	3.09747274228389	3.08807993020678	3.4166200811927	3.39465814356477	3.45369081690862	3.6097838098491	3.5221204514984	3.58356871561528	3.57384881479491	3.53854963650468	-0.273738466324837	3.38805390017037	-3.23044079959031	0.0051178863322631	0.0128724518598831	-3.6891561160924
ENSG00000002016	2.99962867329046	2.06392304896426	1.5956770638851	1.55830316583856	2.13992135610026	1.95973214944053	1.63480719601307	1.85819007411173	2.47599630516645	2.10732646150936	1.97732255099149	2.15523310723553	2.11778003166021	2.67523131939654	-0.194215257269821	2.09421946454311	-0.857696347714276	0.403464033202297	0.494997896539401	-6.78727418533441
ENSG00000002330	2.95020403375169	3.22932877751358	2.92779313678624	3.33873940837357	2.99421618892201	2.98145362645791	3.23122032000729	3.05182402506193	3.3805087979653	2.8577183829	2.58109802985945	2.5333304593497	2.56102408782434	2.66115931502993	0.285940655954438	2.94854418498592	1.93590084862766	0.0703734871268897	0.11656446813029	-5.73626287977464
ENSG00000002549	6.08717756078388	5.98015251632697	6.03472437425142	6.20596151136453	5.83002615624976	5.92941933382267	5.9598361804243	4.83535239656731	4.94388391150824	4.55001528155	5.09175454135413	5.04697523912099	5.3106819254946	5.47322377493724	0.968572659904494	5.519941764554	8.43886795279696	2.35327910152335e-07	4.09167999209154e-06	6.42110610900462
ENSG00000002587	-3.32125181064604	-5.55625816327839	-4.20073193516776	-4.68525683999528	-3.85677853144195	-4.26956056690292	-2.76856952685274	-2.2287857805577	-1.05650596192883	-3.19213058542515	-3.67108829602419	-2.7569924226818	-1.65545957131318	-1.83067330301103	-1.78184520756899	-3.21786023537335	-3.79344545059652	0.00154272353395748	0.00470706646572988	-1.46649589366108
ENSG00000002746	-1.367354433183	-1.78587892205508	-1.27490715657521	-1.36135246421467	-0.963781082736897	-1.23799100017519	-1.22934384192233	-0.119461469009233	-0.252646875441535	-0.0908052036211724	0.268274439279973	0.221386988381484	2.28920138131861	0.621393085928987	-1.75634845632887	-0.448804753858947	-4.70198776487414	0.000227155663116738	0.000968714637629229	-0.0640397687012513
ENSG00000002822	4.21111216191771	4.17800364740312	4.40218187206308	4.37999673652361	3.8948324867034	4.35802693264872	4.33762861089848	3.90119399090513	4.297026550438	4.0955899410389	3.94806397115581	3.96230257158795	4.39254190354505	4.30974376275503	0.126011774331436	4.19058893854171	1.19160025725473	0.250436545065178	0.335246721292156	-7.23727678108359
ENSG00000002834	7.22547993304816	7.30444121219514	7.15366971820934	7.26228342526711	7.07948128287309	7.31581435267835	7.20325699232148	7.17292603801462	7.27099211763142	7.41714721164901	7.31488422013931	7.06605707519379	7.78951958040681	7.17448475525492	-0.0943836629680543	7.26788842249161	-1.00035582478635	0.331721292518701	0.422496845044487	-7.70553369083077
ENSG00000002919	4.11334804757734	4.60486111722315	4.73492950266276	4.81616674158229	4.82282442128097	4.54844646948594	4.51155092058516	3.98093696305364	4.18370920458062	3.88067341447643	4.18434897341807	3.72233196293123	3.93450216558876	4.11852416994841	0.594829149528251	4.29693957674248	5.1526264423881	9.01538288053723e-05	0.00045416483873766	0.404254976750702
ENSG00000003056	7.36808406635539	7.54527351864922	7.60455524584151	7.61168649915695	7.65909826655197	7.93541535236997	7.67838296639446	8.14302009168287	8.16702833894658	8.24465379116914	7.59552245969349	7.8528881093942	7.40967749833339	7.53042809668325	-0.219879029361713	7.73897959294446	-1.66040068326567	0.115897038223072	0.177142138919128	-6.87935500146979
ENSG00000003096	2.80104126852626	2.55725477798964	2.87575743018555	2.26294560466945	2.99764427533499	2.35613838854226	2.65650747271491	2.98514942648013	2.00444688090503	3.08100176498806	2.37617234222766	2.85495196535635	1.45371524204762	1.91201661965144	0.254922088548472	2.5124816756871	1.09919371968364	0.287613704474203	0.375555424627235	-7.09093572308245
ENSG00000003147	1.80742462714626	2.47962614048118	2.81385675742535	2.33714115106777	2.51920178356457	3.16444994611618	2.35303812560537	3.91429351621373	4.23206251721543	4.14314728126848	4.07923540330908	4.08072521599058	3.90710191769347	3.62061273392032	-1.48873213344055	3.24656550835841	-9.35584127071415	5.73474373541581e-08	1.407208992011e-06	8.100477339084
ENSG00000003249	4.51468150209595	4.17742423389742	4.76044778751396	4.84016315751818	3.87290507378151	4.85549296605418	4.64566293209524	5.39268097307568	6.10039690209549	5.966035096583	5.90140710213535	5.66323088991613	5.89524001190338	5.68701347717585	-1.26257474106352	5.16234157898867	-7.10506025936605	2.21076661030066e-06	2.3356979526015e-05	4.75455555045228
ENSG00000003393	4.112517412798	3.71451273899276	3.64467313516962	3.66571947071423	3.90099150627107	3.45958048849519	3.70628079326074	3.73222981597624	3.88850357199198	3.93723704376383	4.21895433302283	4.116187720543	4.18079593726372	4.14096760021053	-0.288173681507172	3.88708225489098	-2.79056259941033	0.0128999452797022	0.0281320971150789	-4.73549350066262
ENSG00000003400	0.610664187515724	0.625943003623161	0.161941734992778	0.880477646557704	0.591859365844228	0.0919838041313579	0.678794455355104	0.723826640738563	0.902223957127438	1.52352126013406	0.142967568328845	0.430971132101253	0.488909337351627	0.12701711939693	-0.109724604173581	0.570078658085627	-0.527553630436584	0.604898507756005	0.685757888780889	-7.29485928786278
ENSG00000003402	1.41545006665157	1.37285484255221	1.064714458817	0.352746308821357	1.29840419532754	1.19313894244398	1.0932691853117	1.1806229719024	1.05534885797154	1.10444733074675	1.21933633203169	1.3783411809176	0.932584478556212	1.05628294452209	-0.0153179416114089	1.12268157832669	-0.0986119070529337	0.922645878053883	0.942390314014251	-7.50540135327647
ENSG00000003436	2.2920348176922	1.39461278983029	1.96568777054678	2.61315334535006	0.212818057402254	1.75345743365116	2.0745999990682	-1.04858015961481	0.829746299881249	0.80624155480318	0.0310327896838192	-1.65519264783103	1.2467158143868	-3.17558791018328	2.17810191894191	0.667195711047634	3.92352673028581	0.00116942652579142	0.00374795850614365	-1.50163946421972
ENSG00000003509	3.22791490686451	3.01137231368809	3.23288739512408	3.2986268410422	3.3390270525082	3.3042899076847	3.39634724039641	4.50469729320248	4.66283520138159	4.92394585979731	4.50754242257244	4.46944488951772	4.21116781633945	4.14702558133809	-1.23073725945566	3.87408033724695	-10.3375464144312	1.40378537831622e-08	4.7617301732924e-07	9.52182302142541
ENSG00000003756	4.69433875603941	4.62663915624778	4.41722923562014	4.48785769798454	4.57478521462078	4.50967778973581	4.73775771886616	3.832442773959	4.16554035090992	3.975028238661	4.13113125823685	4.38914012843092	4.47845654657037	4.35202519486466	0.388994528362298	4.38371786148195	3.94012109819966	0.00112886097429813	0.00363571498231874	-2.3366922929443
ENSG00000003987	0.960973954671279	1.42804130013592	1.45652718532515	1.00585337073937	1.14792820169323	0.788013352549912	1.47604047328895	1.04944142882446	1.07879310811599	0.335429740393768	1.6959640764244	1.6498930833599	1.40996606715492	1.09580995611212	-0.0138931009146273	1.18419109277067	-0.0688709982211718	0.945927980029738	0.959807373484113	-7.4240115600527
ENSG00000003989	2.6218870489159	2.03781098981663	1.91864427310138	0.278645958070092	1.88067441789707	0.765521740507341	1.54507839681194	2.21438025919128	2.14460786143699	1.23633730361908	2.90678848908559	3.05574217418381	3.54003013845876	4.2901088510051	-1.19430786797501	2.17401842157864	-2.69264868691257	0.0157961353016592	0.0334356109141729	-4.29713709374754
ENSG00000004059	6.32645442283858	6.76808295908553	6.71738979332165	6.9609655741829	6.54408600973381	7.05964618652476	6.7731691473142	6.94201207006653	7.05394095573561	7.30234583399037	6.75421655658656	6.78204467648929	6.32543549854925	6.4939137280677	-0.0692613705269194	6.77169310089191	-0.484787646609429	0.634261020728745	0.711483030717932	-8.01698805422215
ENSG00000004139	1.8241032949735	0.666223788197097	1.4006002160625	1.68485549581807	1.40151725662307	1.41393059486789	1.77688317698307	0.745821611977034	0.223498744698231	1.17439474561929	1.58563519184057	1.25320516882223	1.84287446917608	1.62528879675735	0.245660381074594	1.32991661088686	0.995047811553473	0.334219163501358	0.425054444138094	-6.87219068222485
ENSG00000004142	6.50452836606372	6.54581678785392	6.54745886653066	6.68679500239839	6.48274102534642	6.73341568925832	6.47492003369113	6.4563411201496	6.3271184659596	6.17321496757264	6.32141732699862	6.24859682180288	6.39537975181374	6.47909361785554	0.225083153433992	6.45548841737823	3.26897436439651	0.00471602585166047	0.0120231987097946	-3.80680275848926
ENSG00000004399	2.96552518587079	2.89970391471737	2.58570939989644	3.00884067177594	3.52091452333747	3.35970343830148	2.95227924452193	4.30383520608707	4.19210883918882	4.60299402529609	4.70989313415381	4.55671939182151	4.69026718027429	3.70724141553674	-1.35536848986096	3.71826682648427	-8.15853378551293	3.69744313563182e-07	5.79170918967502e-06	6.00599075645998
ENSG00000004455	5.10062976380016	5.09196540669666	5.67023279085054	5.46301254371099	5.43705954339733	5.59008409571319	5.60086838858089	5.48119879780381	5.44731347105518	5.55995961568615	5.34405589940977	5.28299203772786	5.31581557916083	5.51145855382898	0.00207039933591346	5.42118903481588	0.0212860213679016	0.983275232529241	0.987820293447247	-8.16218350922224
ENSG00000004478	6.81170487330205	6.2043927949117	6.3780359117914	6.52741862282874	6.31360096149073	6.45267392354254	6.48223836069282	6.65961007111906	6.64407657376363	6.35821921869056	6.5695618264205	6.55324015532609	6.522442537944	6.96159761169881	-0.156678925789474	6.53134381739447	-1.57806252989982	0.133710394314282	0.199900406485582	-6.91624477207753
ENSG00000004487	8.15184420572762	8.26995540982954	8.454298624676	8.45970883723574	8.41791454032149	8.29949075798387	8.44508816253774	8.20217539699474	8.08329842035704	7.86917575538939	8.28635198897589	8.28796248391971	7.79084208551009	8.05988677130205	0.273848314813391	8.21985667434006	3.14683040884699	0.00610953785751116	0.0150129588660949	-4.12456317733914
ENSG00000004534	5.66280644055439	5.43317417068105	5.48105009743968	5.42162216288916	5.54775750351378	5.72762323506428	5.63346196753914	5.44620968327185	5.4419179718312	5.73214741875199	5.23051217828449	5.47349949859896	4.91972312775425	5.3114735579034	0.194465387405576	5.4616413581484	1.89392786180048	0.0760751810711437	0.124450407099044	-6.43817152752701
ENSG00000004660	2.13511115181106	2.19059991895663	2.03961006338973	2.34127847355895	2.15574775168975	2.45563144516437	2.48186558734797	2.36024849757174	2.35590049563785	2.47847973457449	2.21452858610342	1.92776344204344	1.99732436840846	2.66133183274149	-0.0174977894481754	2.27110152492853	-0.128489135207459	0.899329889020152	0.926192594285351	-7.53207217169196
ENSG00000004700	4.97945014708565	4.56690013387791	4.65554887572943	4.64932563759055	4.87822648346384	4.46513659875547	4.92719502405402	4.95815353479965	4.14031005931972	4.97766900799774	5.24137357959127	5.02470726555493	5.29969797448291	4.73205836208373	-0.185855223395806	4.82112519174192	-1.21051139101165	0.24330025706302	0.32698845281736	-7.26261323628689
ENSG00000004766	1.43164444989721	1.62405186369488	1.58981588922318	1.44058236224428	1.43865518611057	1.22090546721628	1.53122048332934	1.67032522406168	1.58252539943097	1.62467115873974	1.61913203243395	1.94868419223843	1.94381670792497	2.03649804475305	-0.31131480131277	1.62160917580704	-2.86393185807873	0.0110731426879118	0.0246698187176597	-4.19811130492245
ENSG00000004776	3.12438746818591	3.46165218142267	3.43707403486182	3.4548380032209	3.27605934779778	3.62487551045138	4.10038208434341	0.569592543736226	1.66828910017492	1.48580146677288	0.783965821720472	-0.377561202770847	1.33884560872088	0.920050397444864	2.598548802626	2.20487516900595	10.2075184073985	1.68166023860859e-08	5.39408451584871e-07	9.73907876711333
ENSG00000004777	3.35654941284153	3.46577062497025	3.44990069310927	3.29659280217666	3.34617428204112	3.59482298919592	3.23328945008388	3.0875148043831	3.19135889710581	3.41684786982434	3.51757026168375	3.22137989164449	2.4666119976038	2.97105698276512	0.284440848101836	3.25824578281636	2.07274012547978	0.054355438028311	0.094239321402076	-5.77722196625167
ENSG00000004779	6.730384638265	6.87670132905366	6.84583414709853	6.74826628412384	6.8923506846548	6.76464373529668	6.71802341520928	6.87393389210051	7.00260539861974	6.90080708899262	6.57193630986743	6.62913973454614	6.48851537092068	6.69092330285677	0.0596666481350665	6.76671895225755	0.684801449104332	0.503066923225188	0.593412242932134	-7.77554039529814
ENSG00000004864	6.07527017085697	6.07014618008163	5.8657559317322	5.80253356375823	5.89230960772283	5.61646062484463	5.79562162085293	5.59284920398868	5.56451777002276	5.64194336240549	5.79562936038093	5.73453075324708	5.88887196725684	5.81295878872086	0.155016748479905	5.79638563613372	1.88037215939156	0.0780027624187888	0.127244554536802	-6.45575553577611
ENSG00000004866	2.55342997594859	2.64875936452059	2.64827976482519	2.5384202460338	2.3926051324738	2.61072167792963	2.60553506212521	2.88015479344536	2.69214179102366	2.79138788336483	2.6352536339942	2.35332167406204	2.95745455644025	2.7627265840121	-0.153519678772544	2.64787086715709	-1.55661733343852	0.138713946259597	0.205662984520106	-6.64602163341704
ENSG00000004897	4.2512315229592	4.47661558851509	4.44985089617819	4.2302614613647	4.30858016179923	4.14330775831602	4.48141799722032	4.36014471114305	4.52485088363391	4.34539470257173	4.47023274461391	4.70560632962185	4.48504490125031	4.50432676878659	-0.151891263982653	4.40977617342672	-1.80986730210229	0.0887447468335724	0.141654073929365	-6.3838651551233
ENSG00000004961	5.54072091574528	5.9122426883399	5.88967352301331	5.79933721164502	6.14244728969618	5.63105255635851	5.75600077301066	5.42233599527204	5.30328361867472	5.00406392573086	5.55422218095147	4.9914976421152	5.77313646732381	5.51965037996538	0.43802911606372	5.58854751198874	3.41622968501356	0.00344800521319706	0.00923743593436527	-3.27420277230354
ENSG00000004975	5.34110427495877	5.70526575028805	5.67006156943212	5.76993566073467	5.70011152120036	5.78400871597673	5.68342082536344	5.23599122834988	5.0998321759545	5.18292627255543	5.31926254504676	5.31222523295445	5.31461329876586	5.28568265801754	0.415048033617987	5.45746012354275	5.43852834290089	5.07671773757027e-05	0.000283694819026482	0.84495624985076
ENSG00000005007	6.11690317281376	6.0306910788057	6.02018879785215	5.98761347853997	5.98666619580001	6.15883656390053	5.96359914347524	5.8650875041689	6.05001870545629	5.77350898016391	5.83134531953338	5.85972197231252	5.82689757523639	5.75785646521907	0.185936985271788	5.94492392523413	2.99402714490231	0.00843239015057971	0.0196836633146731	-4.38752145400915
ENSG00000005020	1.49138114296762	0.874185362312685	1.03490604864193	1.0537042801749	1.55971680097167	1.36851964774402	1.09168358626761	0.361530052819077	0.257526004463448	0.684121516493844	0.7125900836697	0.762089706863291	1.10973763940927	0.598933852747658	0.566259976761949	0.925758980396194	3.64541854081202	0.00211529576144841	0.00616077639732435	-2.38904295417951
ENSG00000005022	8.19919921232381	8.31582852293036	8.35196552685814	8.4293863273434	8.2882040814209	8.29938325196659	8.30303575067866	9.48240676178978	8.94026733576155	8.9179786142763	8.79247934588365	8.73372117251721	8.60865602009007	8.73769273310166	-0.577183415006376	8.60001461835301	-5.21817560610379	7.8963416762916e-05	0.000407057918433482	0.36413057480385
ENSG00000005059	4.35560590470605	3.89570247119919	4.01578218427035	4.20809855246777	4.42531399512339	3.90049700688781	4.45785358317931	2.59490491734348	2.62485891479555	2.04118013122158	3.20612278744064	2.49169454423488	2.66238278517254	2.11958921624955	1.63762279157978	3.35711335673515	10.3686416861495	1.34478415580212e-08	4.63664814738458e-07	9.65811955807273
ENSG00000005075	5.54936976585658	5.69813519641915	5.95817572872991	6.01912806181954	5.80261534056462	5.94148932033951	5.63491526160743	5.97870822187262	5.8744535751793	6.10358878358608	5.53250882413669	5.48503882729662	5.1807434365236	5.57914262017436	0.127786663461131	5.73842949743614	0.92187823491931	0.370002469114228	0.461734856104714	-7.39360304599826
ENSG00000005100	5.69552636483408	5.41274671860991	5.25408988919832	5.00131783729036	5.27624104573696	4.71902739767139	5.21673662404392	5.00086039347849	5.00843584200729	4.49632166628271	5.69106845574364	5.48764691017101	5.84955632538286	5.85679818042398	-0.11858105547992	5.28331240363392	-0.58528548885293	0.566350685646833	0.651271182445919	-7.91402600672965
ENSG00000005156	4.094762929139	4.08287229963867	3.71576929446051	4.07920052920359	4.1768092529938	4.18255434734675	3.987715488054	4.62411434467062	4.68239538702085	4.59809154946297	4.88144432924949	5.06999805185782	4.82959089112421	4.91049726322064	-0.753397471705979	4.42255828267449	-8.22248268936755	3.33245070313963e-07	5.35082552874835e-06	6.02784101375791
ENSG00000005175	4.74966008346716	4.77236095238677	4.89180508925252	4.81685165803857	4.81152820105635	4.83961716536011	4.83189456503329	5.24112586194224	5.33320729298918	5.36546887246694	5.17765308336504	5.06584061877444	5.13433313509982	5.36310876094914	-0.42209102201307	5.02817538144154	-6.22227042349497	1.10968827405143e-05	8.39404349501553e-05	2.43231618516653
ENSG00000005187	1.35329369723694	2.33780356345177	2.19742407336604	2.66293078878166	3.38600518740016	2.63258764590548	2.31593451329704	2.9824593851342	3.47808834282618	3.05816141843261	2.18223290730993	3.09135610843137	1.5377878052255	2.50939495655902	-0.283923816499045	2.55181859952556	-0.928763943627095	0.366527577525834	0.458527524317373	-7.15443241446084
ENSG00000005189	2.91527246076667	2.88382706181322	2.83534358915222	3.47446254145285	2.96842193489263	3.46300035699813	3.02412255428048	2.3929666747671	2.56484053628525	2.72724742597602	2.18546002676419	2.98259872677749	1.81272335526917	2.49812230854908	0.63639793567118	2.76631496812461	3.74574470909426	0.00170785075208411	0.00512860880918227	-2.34203990227419
ENSG00000005206	4.82900782763997	4.92490650435996	4.95836298711965	4.79478533401192	4.70561810146275	5.13980996381897	5.02402519570356	4.93777857913951	5.00848654954461	5.03236234168388	4.87500784171484	4.8804887222401	5.02535772955613	5.18498339121128	-0.0741297603773701	4.95149864780051	-0.854919711515296	0.404955216397589	0.49649541037323	-7.51586125585486
ENSG00000005238	2.61562466816359	2.76380486251583	2.72497607030272	2.59293221547512	2.71655483078187	2.57391282385939	2.61385570324148	1.77897399409061	2.23162161801494	2.23609590110118	2.35452056728527	1.62709330722244	2.35213857280952	1.94200989462825	0.58914151499615	2.3660082163923	4.52315270214766	0.000329656855653441	0.00130990975845838	-0.5531693430286
ENSG00000005249	4.32703990917799	3.746102290172	4.28519768126301	3.81141856464643	4.43215263548184	4.05953728599591	4.71557555397599	4.57215383859286	4.38354478678586	4.54820004001229	4.77343477391917	4.26910495717808	4.45705477644505	4.39274142272408	-0.291127173425727	4.34094703688361	-2.11722924893155	0.0499110804842544	0.0878732475877131	-5.77419739080507
ENSG00000005302	2.80209416129273	2.8213860637059	2.70431455834288	2.64539953242054	2.70622889319262	2.61414167663617	2.68708691486154	2.65174195420613	2.64892078909839	3.37811063716042	2.69692159535085	2.30981257028829	3.06559838078655	2.79656118327554	-0.0768839058303903	2.7520227793299	-0.55090261248643	0.58915332158621	0.672095330117702	-7.5212886656052
ENSG00000005339	5.23173632298636	4.82752369630991	4.50075188538586	4.32485931369489	4.40724233760092	4.07060195870366	4.43345770160755	3.76523867648646	3.49957436138756	3.35570196456885	4.68759387637781	4.63185172689585	5.3542407170852	4.85172046811876	0.233078171258996	4.42443535765783	0.83176941095088	0.417527933340664	0.509446864831	-7.74191044958879
ENSG00000005379	0.833611324563773	1.11078765473421	0.705640854566568	1.01790879861757	0.941313567824336	1.776183534862	1.04974715974504	1.57761453656864	0.970907169226469	2.42606792095606	1.43231773494004	1.86161585401962	0.716457384952931	1.33207295700461	-0.392265106273165	1.26801760375585	-1.63501740929656	0.121158349828659	0.1837763123896	-6.20984184562776
ENSG00000005436	3.19824873280348	3.33584972249433	3.45572612800719	3.30598245472976	3.34985548310936	3.08583957812609	3.53472338668878	3.27354368186517	3.05358128757457	2.93485502957052	2.96779623287848	3.22106840421247	2.98604732238162	3.75124060010226	0.152065213059437	3.24673986032458	1.25452361803499	0.227298441024819	0.308996908937013	-7.09822559622515
ENSG00000005448	3.51184489986473	4.11707662583253	4.7051588491748	4.67766978514293	4.13161757890916	4.82109235027108	4.75284388324668	4.32213112958344	4.29648234120337	4.32046638945672	4.49018131686433	4.39785915848042	4.19342820777936	4.31824041513639	0.0604013798645573	4.36114949506757	0.355276002765958	0.726926817679874	0.789103308774683	-7.92293076851511
ENSG00000005469	-0.337372702244397	-0.644724106058714	-0.0963659466256073	-0.180130463336774	-0.0766265866280693	0.174650122210089	0.0263897913072233	1.39648212563797	1.24115328560643	1.67497219625751	0.57268511200739	1.14222300144652	0.315204348302437	0.884410669430874	-1.19341083935521	0.435210774808063	-5.45502439066101	4.91276373552537e-05	0.000275926384056665	1.53195151598739
ENSG00000005471	-2.58662140266997	-1.34363475584429	-2.4490158088758	-2.90496339753388	-2.04782215975182	-2.20750090048456	-2.82055815695669	-1.48169377344416	-1.07020263738888	-1.11901002210837	-1.18639143062644	-0.908219865616295	-2.94563663982553	-1.75153282635629	-0.819783604490597	-1.9159145555345	-2.43730765783574	0.0265715625426715	0.0517195726382304	-4.36294076632749
ENSG00000005483	3.36977462471964	3.13896248291976	3.16208186559872	3.17466711565827	3.07293619262576	3.16993293601449	3.18363836446411	3.28743845128732	3.27859015001971	3.35954696281878	3.51198547894335	3.81255499345182	3.40490851396819	3.7030693625313	-0.296026261217436	3.33072053535866	-3.20791821348618	0.0053682228378342	0.0134354596255974	-3.83379281138799
ENSG00000005486	4.39977183233368	5.63926961367789	5.6612099859684	5.23910108014606	5.88553930136739	5.56059203463234	5.62346590243643	4.77977440254336	4.38493837406661	4.36707397914491	5.08554188764622	4.74402440483356	4.42395226878041	4.17681207179431	0.862542316560695	4.99793336709797	4.2852849722428	0.000543254170716969	0.00199155015415549	-1.48349215867653
ENSG00000005700	3.59781552498429	3.44177022347564	3.36501475690621	3.32216273112896	3.53096949660888	3.27744604010152	3.51855854234695	3.89521661379238	3.81095769221625	4.0135850902597	4.05655381264697	4.17600645100295	4.24603520703495	4.2134690065588	-0.624194883438818	3.74754008493318	-7.28416642449989	1.61438596478229e-06	1.84785723040696e-05	4.43611004050165
ENSG00000005801	4.75036299041716	4.82121858812232	5.017767321018	5.06458827173966	5.02209436361363	4.95028552111912	4.9651665086634	5.01891995068538	5.28035170554118	5.38134100764981	4.77144860099551	4.65063540673298	4.926887393506	4.9126603982069	-0.0502110603627379	4.96669485914365	-0.473533305981855	0.642096765320537	0.718103084459869	-7.98986921904351
ENSG00000005810	2.78045239783492	2.32306056431914	1.91011957115125	1.91715505124609	2.06559342168336	1.87259519924497	1.81309019965823	2.71009604637801	2.57006935798526	2.25144901533732	3.05798408626897	2.97797639930555	3.39846847175981	3.14997072282477	-0.77847655940991	2.4855771789284	-4.36176922161535	0.000462426596351089	0.00173978179418519	-1.37115536864368
ENSG00000005812	2.68577848721637	2.10327404562725	2.11222716916954	1.93935755476444	2.37239643761756	1.95490467807207	2.53705091496814	2.2403627140942	2.36818094965695	2.28023927568647	2.52112412218048	2.00898534929772	3.04008941789468	2.38054438623646	-0.16965626815659	2.32460825017731	-1.04696081623646	0.310356538429633	0.400142948011342	-7.16775190140466
ENSG00000005882	2.19657651141752	2.98547384055268	2.60113630302248	2.97138327449323	2.50553539099841	2.85389613005373	2.98275523945219	2.23260268093633	2.53035075858095	2.50720586406443	2.78653307442088	2.39109082802448	2.10505885308149	2.31830822515259	0.332069158066365	2.56913621244653	2.21181036643624	0.0415495210983234	0.0752752636629494	-5.32491800619454
ENSG00000005884	2.05784675355173	2.86273435747079	2.40823175380473	2.932385462727	2.31311430557379	3.12471654034632	2.3854993541246	3.29908434083157	3.65707186684202	4.34700336308183	3.36300323819281	3.11010863480021	4.82485990389387	3.46522217172854	-1.13276720764483	3.15363443192641	-4.27876413323352	0.000550777194173608	0.00201125389447554	-1.40835460079653
ENSG00000005889	3.43847572711146	3.15852856052123	2.45017735255535	2.49562637971239	2.58299816235974	2.16727801774575	2.60130679822984	2.16071922244067	1.82402144826707	2.14087466120983	2.44344008403799	2.39957281332238	3.03864935161439	2.90351234223909	0.278802803022173	2.5575129229548	1.28804820282805	0.215669456654811	0.296633852067545	-6.85537056502255
ENSG00000005893	3.3719451796819	3.58274020877327	3.52242637041063	3.22002423682554	3.49420448757258	3.53695954643131	3.4120346480443	4.70654263598767	4.27287735985029	4.54320670262013	4.23152182776684	4.32942069628994	4.01494703115717	4.15765512275467	-0.873427912504968	3.88546471815473	-8.15743289246411	3.70408134310428e-07	5.79464961785633e-06	6.03449442953791
ENSG00000005955	3.78093496336495	4.0201657822785	3.99549157936212	4.03349390922471	3.99985256351651	3.97416696705911	4.0149693538278	3.71558340907826	4.04310029650976	3.78552256575054	3.65063878786023	3.67613287584328	3.54434102111547	3.66751456282465	0.248974066439389	3.85013633125828	3.14742833602605	0.00610181533344252	0.014997010182417	-3.9647874518525
ENSG00000005961	0.644910645811951	1.01729375325323	0.697305257145426	0.957280050186334	0.735340874281578	1.80175699134223	1.29719916821983	2.64754270647177	2.62071887373438	3.21644463791835	2.41374833863154	2.81145887939012	0.586930764449577	1.45458922585536	-1.20600354996315	1.63589429762083	-3.21699360103682	0.00526593087736758	0.013203882304994	-3.2811123927528
ENSG00000006007	5.16654934978385	5.74983110320209	5.6353618220522	5.74764377788409	5.64042103919082	5.54781961190657	5.62972997724976	5.61043771495377	5.75942570841687	5.70764548698397	5.67069910016166	5.6786463586361	5.46689734424825	5.56686398713557	-0.0486021573674451	5.61271231298611	-0.554281313046056	0.586892146493805	0.67001822671195	-7.96851049320214
ENSG00000006015	7.12422831051088	7.52634619375632	7.76580784491028	7.87338551018553	7.68503635365845	6.87877524800441	7.69509153162056	6.41955183494321	6.66939473355414	6.48193372162071	6.03335784643408	6.18463062448202	5.71992720678782	6.37616043357877	1.23563325058072	6.88811624243194	7.22871233413862	1.77860890568377e-06	1.97508793082572e-05	4.37368923038889
ENSG00000006016	3.40388525592753	2.61553206237637	2.51870262533517	3.44338714096024	2.66892494414927	3.91535102338573	3.32148220191254	3.43537330758426	4.2583576920962	4.52598287918479	3.39895871019138	1.64701533690565	2.43420029264227	3.34667035664519	-0.127666698313112	3.20955884494976	-0.334171429172205	0.742500279442954	0.801931928396503	-7.55820630675149
ENSG00000006025	2.51978072200949	2.43997721734173	2.52681174033254	2.86880660019903	2.72467130514516	3.01980229518244	2.81763391550458	2.81830427290532	2.84985926975056	2.74655121411834	2.40307467704423	2.28564652432937	2.1642530612141	2.33425181407671	0.18962662489717	2.60853033065383	1.3692150061677	0.189456991252729	0.266730022040135	-6.79339277559741
ENSG00000006042	5.43670679286396	5.94257218678273	5.82801706943327	5.62866278769025	5.64885507564409	5.80941580503939	6.07881887793767	5.11548467841987	5.16601183725309	5.20587463185538	5.34149051182712	5.26320668012359	5.36442394312503	4.6830569356618	0.603788842220132	5.46518555811837	4.70563471399097	0.000225444026597778	0.00096377915269461	-0.272198083381999
ENSG00000006062	1.99045876142356	1.48476037033565	1.65553590690774	1.45365198956823	1.77368196397985	1.67714806829245	1.40079306034734	2.07412217111639	1.84870009904649	2.64918817398918	2.05885445189119	1.80876742633773	2.83700323049746	1.77068578584781	-0.522279781642533	1.89166796139865	-2.92042586341787	0.00984003969143507	0.0224107640502351	-4.05085477785388
ENSG00000006071	-0.771992502781166	-0.567202987663127	-0.023591104697009	-0.303618828350198	-0.833346357350688	0.120809926596105	-0.910070563416019	-2.5874447125468	-2.31855017680406	-1.48288120335731	-2.16526905733076	-1.15467386192018	-2.83912362995885	-2.79576022785891	1.73912995922557	-1.33090823481707	6.22146581833339	1.11137515809767e-05	8.39636688343065e-05	3.25684846282979
ENSG00000006114	2.54208905730144	2.28796467599572	2.14690822012133	1.65482263624855	1.94813100589885	1.70564698329218	2.08492311801836	2.8191782129053	2.68154556021614	2.39503755983666	3.16398946645812	3.20292267943594	3.28993211743343	3.57149397993025	-0.965008194072034	2.53532751950659	-5.33344870924397	6.26247128834902e-05	0.00033755774158767	0.789786848393988
ENSG00000006118	5.01219747442918	5.21356519196168	5.26625695028909	4.90587023865008	5.22178783961125	5.31861158724491	5.30794674772734	4.4590914190992	4.39767850111677	4.45399133534443	4.61527533511716	4.64831086499899	4.55354318434043	4.58225805003047	0.64909299538678	4.85402747999721	8.31705628297858	2.86033841034536e-07	4.76240475955039e-06	6.17917003321775
ENSG00000006125	6.21436223129592	6.174694922676	6.06295886207748	6.25667667274078	6.25401334580395	6.33831441310612	6.28689769385442	6.49884080271434	6.5594911446646	6.64137911666517	6.69745413849927	6.66672399813058	6.69719282941853	6.34932269211923	-0.360414389957368	6.4070230616976	-5.16334303375226	8.82183674786394e-05	0.00044644729753951	0.197943896582958
ENSG00000006128	-1.29768909856919	-1.17114132526294	-1.11390811887632	-2.80470861480349	-0.753749052200546	-2.08777340025272	-1.1350416322693	1.44012605974261	1.16316680635746	3.03446966509034	1.35444756379413	1.16723049148127	4.11382735994245	1.44581600038916	-3.46215166988805	0.239648050325923	-5.65490652876461	3.3095113506925e-05	0.000200597921560152	2.2218399799923
ENSG00000006194	4.45493316748765	4.51698194906598	4.5575381805454	4.46048465152417	4.52708266046677	4.34649576013274	4.45782146304618	4.28370146544567	4.64977977671313	4.30583775404453	4.57578176098721	4.20795079246569	4.83287915082637	4.42850097952553	0.0042742431787941	4.47184067944836	0.0447485286511364	0.964849996408371	0.973569002345074	-8.04128105500682
ENSG00000006282	3.57140269740649	3.49735841000569	3.29702889103067	3.60585545138908	3.28775074006109	3.66088828030906	3.5034028389368	3.50296659140027	3.23934102880258	3.52327633524532	3.38027571006555	3.61474775653222	3.24005514735613	3.21942448750568	0.101398981855796	3.43884102614619	1.10387068404498	0.285638762272588	0.373496924755014	-7.35352858393934
ENSG00000006283	1.02971992628151	0.92890596799572	0.801976361043989	0.775595778284387	1.0059551931002	1.01995749781869	0.881673050093504	-0.348818145717639	-0.502520487169991	0.225833995936455	0.0886466006362401	0.342614440025718	-1.01626794983387	-1.70511330678378	1.33776316714465	0.252011351550795	5.63031620474282	3.47336271696041e-05	0.000208247771567119	1.82463875689779
ENSG00000006327	6.53758112093358	6.87210629927878	6.72985803862956	7.21701242382003	6.94307072677547	7.30911411726364	6.88643540518195	7.03920347398584	7.05779562030138	7.74327978842506	6.40960351892734	6.47261400275973	7.51381317157977	6.2624927048816	-0.00413089306630532	6.92814145805312	-0.0196688544405978	0.984545685435213	0.988688575695708	-8.11921889908593
ENSG00000006377	0.430229120759416	-0.328893317430816	0.539204375062325	0.781908708066319	-0.190434102466037	-0.0861470907938451	0.256470280823133	-7.09069591835452	-4.0300853538391	-6.97041456150381	-6.64404300343766	-7.08440095095369	-2.89427571772644	-6.24965084200208	6.04630371622811	-2.82580202669977	11.6520690326195	2.47699947767567e-09	1.23841900820198e-07	11.7178645929301
ENSG00000006432	2.75059875276453	2.3343685744931	1.80000603980876	1.36088183808608	1.82328266535809	1.20907108329532	1.55766974171279	1.76981812213888	1.51808311043684	1.05644502502304	2.63652651895124	2.3046910582745	2.74846811413409	2.57012164600077	-0.257556708184353	1.96000230646272	-0.905304977869298	0.378457711993208	0.470501410895745	-7.33632899270362
ENSG00000006451	6.66355638766149	6.65796284076151	6.72903524685312	6.8715255281947	6.66834955266962	6.49992289375271	6.68883337599717	6.73682064823989	6.89288457300773	6.55383675484209	6.66111977092714	6.67078940601177	6.53492274063308	6.71515503092781	-0.000618203068802892	6.68176533931999	-0.00767331231694164	0.993970535415437	0.995852435507185	-7.94970573106483
ENSG00000006453	4.36230218978153	4.64710242691524	4.63703637022907	4.64496589251386	4.72582999917444	4.98640617971317	4.92131196332147	4.84522746797969	4.62486958383277	5.20704132153108	5.09486327991374	5.18987886807118	4.49657269713667	4.32941239226259	-0.118910156312031	4.76520147374118	-0.816253093588198	0.426094112808354	0.517977571613112	-7.61352355169981
ENSG00000006459	2.54073977398546	2.45997175302827	1.95440550484095	1.8575657349657	3.32422130674882	2.03648358633008	2.03854907529237	1.91711552002774	1.95838958781679	1.09784600144913	2.28526780425135	2.69544974774951	2.39364651450875	2.60237466331444	0.166049471396489	2.2258590410221	0.65923797950594	0.518925328932417	0.608697010257946	-7.41102554760763
ENSG00000006468	4.84075411596146	4.74382187016262	4.78098760640888	4.18943383574375	4.41123585973606	4.15334945102182	4.14180288847887	4.20879789356995	3.98824180098848	3.77563624517696	4.18215876419403	4.16495269501962	4.27024333609975	4.78712237392494	0.26979638624861	4.33132419546337	1.78293403080356	0.0931806495705692	0.147592619198776	-6.60139406667377
ENSG00000006530	3.86947532138242	4.24979096997933	4.46095650348616	4.55775412143372	4.07027825582863	4.39619224774671	4.15664889422817	3.92869326440538	3.79101282692664	3.98671233403686	3.52055039904401	3.87183631985598	3.51121078357308	3.53844716167627	0.515072244833011	3.99353995740024	4.43877193411234	0.000393368120196401	0.00151797190580545	-1.22334121972732
ENSG00000006576	2.78223986936783	2.57055098773679	2.35298561000365	2.13745592952823	2.43274751925902	2.18365043043363	2.41002683804592	3.144084057105	3.21822712189248	2.83493427744033	2.95438550214433	3.2713073102339	2.92453771386307	3.10361155970514	-0.658162548579631	2.73719605191138	-6.13289243960961	1.31436099121204e-05	9.61363438944813e-05	2.39420233751211
ENSG00000006607	2.42518611359071	2.51996576869796	2.19053085239911	1.97619611994791	2.34506446140605	2.02919169119987	1.97217241176795	1.85046437067268	2.03709668451302	1.58967716299613	2.4549670479156	2.40008884421714	2.36353422245967	2.32616244580353	0.0634176051893229	2.17716415697052	0.427200535802818	0.674808689831418	0.745425355231275	-7.64942668025887
ENSG00000006611	-1.85138258069738	-0.594048946438646	-0.664728657669052	-0.481506168965791	-0.643242355633172	0.372452643014816	-0.558504428643392	0.432675428136507	0.322909245548023	0.772726166032474	0.138970176025496	-0.219123085542797	-2.88016570066651	-1.24074130725004	-0.214977623947918	-0.506693540910676	-0.430981159019842	0.672112978492675	0.743257047177389	-7.08477418697695
ENSG00000006625	4.9399338549923	5.0127661658938	5.34403133698673	5.28899196080845	5.27918035675099	5.24085586353185	5.20476846273523	6.33876877854667	6.36341807238055	6.12471636814536	5.97866968141426	6.12384820998025	5.80914935357181	5.85190620850256	-0.900551606271674	5.63578604816006	-8.45194431296829	2.30474819822089e-07	4.01878084821583e-06	6.54123277262343
ENSG00000006634	4.2336440931833	4.12154189733963	4.31565349706988	4.47550149182578	4.51592341964827	4.1886393181777	4.26350344425159	4.82052655753295	4.83461916838043	4.51703429778846	4.90676622413186	4.91007342136227	4.87510031916876	5.19595964302425	-0.567688046135256	4.58389191377751	-5.34103773518337	6.16796650707042e-05	0.000332929895696375	0.925178044112675
ENSG00000006652	4.01200426118966	3.71250446946694	3.46101398021426	3.60004232367146	3.53095192190155	3.46789582147639	3.61130142789473	3.692201365667	3.89140168244464	4.14954730136398	3.68121301176769	4.41183294440274	4.77240695277118	4.2812474140399	-0.501587958088129	3.87682606273372	-3.18843875799645	0.00559443996142935	0.0139243208119748	-3.88565550035182
ENSG00000006695	4.20542013784232	3.94335410280786	4.08790742217829	4.08440219018969	3.99745273214938	3.91944950876662	4.22573056215432	4.01325115408433	4.08888515641823	3.99048436181679	4.0160059630973	4.00417677688173	4.0986989104364	4.01746055403997	0.0308700738508865	4.04947710949023	0.419343532054396	0.680425588234336	0.75026814951985	-7.85381103983666
ENSG00000006704	4.38649072383526	4.85876535138937	4.67507651531192	4.76120797440152	4.92631559467119	4.84867846673125	4.8508382759848	5.1032090422935	4.93776130810986	5.08090375749501	4.94501831112886	4.95896103646541	4.22312977673863	4.487651664856	-0.060024835964092	4.78885769995804	-0.437697473538583	0.667335397295834	0.739249942703886	-7.90231951845096
ENSG00000006712	5.5829504899332	5.50257657020873	5.56305274067004	5.37256789657822	5.43349152225199	5.42999908914284	5.33250938691421	5.06984495822199	4.92814177050644	4.91167318488679	5.38438348834752	5.03141768129911	5.77686281978212	5.64142052357255	0.211868430279133	5.35434943730827	1.57274697087096	0.134936174085389	0.201238595122322	-6.64453324490048
ENSG00000006715	4.60195247955345	4.88005269533568	4.08082069322739	3.96749279842509	4.52300077155168	4.08804148643153	4.61164009666152	3.51505935422064	3.61289662444599	3.33995414033367	4.01432413286358	4.0150493096262	4.30288223215919	4.16286424151901	0.540759629439616	4.12257364688247	3.15404094500903	0.00601704756215462	0.0148155949583216	-3.93792167612845
ENSG00000006740	3.31393620608148	3.51667350509279	3.32929889179775	3.39502885018754	3.39523826914272	3.36754145480372	3.35060352130321	3.73446965832496	3.84427706862734	3.8524988849469	3.86757094517749	4.07469728797639	3.493607733385	3.47563605358009	-0.381213713068061	3.57221988074481	-3.95049600837155	0.00110422272299879	0.00357814024537229	-2.15673799328236
ENSG00000006744	5.53576520090131	5.50155107007256	5.45843392831875	5.58638788100049	5.61596250923837	5.57276581289476	5.45173390526477	6.73850817315815	6.79845662107857	6.78878047364074	6.6631981120607	6.53005237794819	6.929388718275	6.95368071760571	-1.24012400974568	6.15176182153272	-16.8420725490112	9.39282386099693e-12	1.96658471433071e-09	16.9744340831076
ENSG00000006757	1.24724699870406	0.494868935219094	1.4339637709854	1.06199132427159	0.979309732782904	1.093261361103	1.61885335872117	3.18327716547581	2.77083569556447	4.31231345345533	2.7403084870717	2.91566101144244	2.57866905041512	2.94453757196863	-1.92579995117602	2.09822127979862	-7.19632004513653	1.88252000718573e-06	2.05859398090364e-05	4.72535965403159
ENSG00000006831	4.9952082690946	4.49687170143956	4.5331316176412	4.52532129410024	4.4981330512799	4.51579980787655	4.54229596646172	4.5435140247182	4.55189451874007	4.52883645673698	4.77328649852686	4.67244264826658	4.9550802833898	4.65798069846742	-0.0828632745206965	4.62784263119569	-0.898815383089132	0.381803735809817	0.47379009671098	-7.70996395025887
ENSG00000006837	2.92339020989066	2.96816215028619	2.97378023046509	3.00602244539607	2.88755963849882	2.73277697629823	2.87323911064971	3.99742068548059	3.77452273431998	3.72531570912322	4.07599580369865	3.84840017535928	4.09479739815906	4.00624921010849	-1.02605539737125	3.420545176981	-11.4500072634174	3.20083551059157e-09	1.49836034613115e-07	11.1168584987164
ENSG00000007047	4.43888696227387	4.74197546528426	4.7185750465244	4.78678078697675	4.66531273357374	5.01723759095619	4.70703637177404	4.81561230913576	4.86346605796827	4.90768535410365	4.69618115740963	4.59020530531263	3.59824575670424	4.0607776886332	0.225492464408681	4.61485561333076	1.27567119235522	0.219907104209099	0.301270752513389	-7.28286118629625
ENSG00000007062	7.12191984266195	6.93247524444829	6.61491322777377	6.80194527443805	6.7258092795473	6.52935508443049	6.89704683214745	4.80270352503031	4.94628146712932	4.31597406288792	5.24298710904309	4.98897564260229	5.72166016659861	4.84832670849064	1.81980758086185	5.89216953337354	11.4873870099423	3.0517565377324e-09	1.45658544395063e-07	10.8845859835611
ENSG00000007080	5.97633541072923	6.63482390093176	6.4814922906072	6.49994829416704	6.67022851306237	6.83933811681866	6.29659194914512	7.58367518560488	7.88103097982224	8.12552703841795	7.1515608596383	7.44816538755994	6.96299925014442	7.34199016547034	-1.00920510342492	6.99240766729425	-5.83857845028815	2.31257609581511e-05	0.000149396834724871	1.69413839865103
ENSG00000007168	5.22277808270753	5.32930360723412	5.16976195455501	5.07321530412504	5.20586622065055	5.06111466462071	5.15433358836025	4.77981071137286	4.5216218039915	4.84140767485332	5.07175192828943	4.96875245114591	5.20520308402173	4.98344798932464	0.263412070008151	5.04202636180376	2.83946746813713	0.0116525107599159	0.0257718895982077	-4.64978898940888
ENSG00000007171	0.0727113237390977	-0.452141625426152	0.577975193753245	0.0455659359360228	-0.482223800731835	0.394441098859338	-0.573524004706631	-0.435026394561228	-0.304205827907413	-1.22585430454788	0.461436608089688	-0.217166240889171	0.685560022453202	0.391140745567059	0.0412023458358468	-0.0758079478837611	0.139524853087168	0.890740488555118	0.919759267515428	-7.08308755003712
ENSG00000007202	5.96762134177471	5.99222165972667	5.72257432005265	5.56680646235952	5.65203039635929	5.54150813651579	5.70760589187459	5.336175573866	5.29275015254273	5.00338665469857	5.75550124268888	5.55857794200261	5.8636811639388	6.18573938241323	0.165780155272505	5.65329859434386	1.11404301583507	0.281377949157612	0.368956153759674	-7.55942928935421
ENSG00000007237	1.03274702561849	1.26076764482852	1.25359236884869	1.44801403887635	1.57212751036951	1.49468145171469	1.46334004174191	1.67636903876959	1.54813130492102	2.72652109129883	2.19588695116258	1.67956916053268	0.986835406585951	0.754829030361956	-0.280756978831118	1.5066722904022	-1.16832535370664	0.259437601955617	0.34509454135539	-7.07053301404179
ENSG00000007264	3.6328327649336	2.88352713174515	4.43169201400756	3.83559406659113	3.69249323518806	3.58368240500101	4.03442969657772	4.45592237171373	4.28892555388417	2.8250721729952	3.30974200046182	4.4312023320194	3.50507903021919	4.34114729524133	-0.173131321713539	3.80366729075565	-0.607124954255587	0.552110858261722	0.639236822786485	-7.1731763365353
ENSG00000007312	-0.236287660509134	-0.0248259728015288	0.251866185865994	1.28200938635966	0.187684566386974	0.582527710446557	0.623168434240702	1.95481212686568	2.1096875340267	2.53696367934587	1.92501702708339	0.0481890375743511	-0.0442781805379505	1.12789403539424	-0.974228700612701	0.88031627926725	-2.2728733011932	0.0368604226086453	0.0679584949221309	-4.69558647652458
ENSG00000007314	-2.95217886194212	-2.366700403434	-2.63345580542341	-1.71671405151387	-1.82095417538324	-1.85528878321103	-2.65558291078423	0.368052492431275	0.580207980544619	-0.0290036254218859	1.26061762640149	1.24107291943419	0.697417038895735	1.22575424892567	-3.04228380478721	-0.761196879320059	-10.1454577008689	1.83416586669214e-08	5.76360721189717e-07	9.78768455424716
ENSG00000007341	1.73126241007301	1.97281874644191	1.91653422477085	1.57968856006094	1.80587306926911	1.54422226866303	1.90697986310787	1.36330522195193	1.60753694702032	1.41893726288531	1.16000329112375	1.56219731526585	1.62038987633226	1.4515418501114	0.318549421837186	1.61723506479125	2.96850873348684	0.00889663894490275	0.0205818271428267	-3.99717133307858
ENSG00000007376	4.12164810442758	3.7199956408029	4.28313996144203	3.98740510140213	3.30854474465467	4.02575056738218	3.81706201794789	4.45712919239629	4.40774225365157	3.78480668340993	4.70959889555425	3.96953011812457	4.98341157761346	5.05840335621411	-0.580122311266941	4.18815487250168	-2.72770960375379	0.0146936179360284	0.0314133187949063	-4.26997831369532
ENSG00000007384	2.70236459358816	2.58249857462142	2.70946665261338	3.34557877764549	2.6231951457429	3.70722089686991	3.11068218919691	4.49210848968854	4.62864315240668	4.97707620362797	3.9134011510542	3.78647280777535	4.10887034268828	3.77913587391929	-1.26398500907491	3.60476534653132	-5.7103185986348	2.968918094188e-05	0.000183238854586015	1.57758722359813
ENSG00000007392	5.37767209196711	5.01059534727752	5.10471326419093	5.29875052728925	5.30880439475472	5.39355927642309	5.15771917536536	5.36568096334659	5.47694439386175	5.53939315043834	5.2111676069099	5.19508068581568	4.93534129926873	5.29135841049374	-0.0505998959665872	5.26191289910019	-0.529774856528298	0.603391781565281	0.684616516587213	-7.98544500671873
ENSG00000007402	4.09956363775223	4.52119539209147	4.06438184180118	4.42829325948288	4.1998090545254	4.61801321191541	4.39022232801046	3.52623645064398	3.31891109924465	4.29286509381124	3.69637161931972	3.91251522948708	2.41805774841111	2.9740483230162	0.893883086583692	3.89003459210807	4.19628709000291	0.000655582203269899	0.00231882911827897	-1.71771616559359
ENSG00000007516	1.62626002683826	2.76135336061417	2.08883967069672	2.0262718095899	1.51726233334155	2.49718204366304	2.40612212433683	1.84249198116001	2.34365105640641	2.64327416127173	2.10702184646319	1.78838939125442	1.24991354646384	1.75729528155801	0.200094214357919	2.04680918811843	0.884400384311308	0.389306879312554	0.481089859692668	-7.16589395998575
ENSG00000007520	5.57895493685604	5.78655858300533	5.80277661147043	5.63029933084578	5.91067459643879	6.0330311772062	5.70537576543295	6.45019766848337	6.56198237133341	6.51424600467589	6.31098973157969	6.12986474770647	6.20927182344419	6.39751392457104	-0.584237944471664	6.07298123378926	-6.06350042796627	1.50007840263664e-05	0.000106024705217715	2.26866585210051
ENSG00000007541	5.05581221671067	5.31418039400578	5.22799064413305	5.09902641817791	4.84778469245405	5.2527903755501	5.14734649823135	3.71283161029817	3.40587227265613	3.85066229814254	4.04038254779941	3.48558699487646	4.38933871074339	4.31401555482697	1.25766516577058	4.51025865918614	8.84658374394137	1.24089860705551e-07	2.46378090480793e-06	7.26950132661244
ENSG00000007545	3.22126797756988	2.93045880912163	2.8070362640963	2.3396513471958	2.5891209190764	3.11539406733016	3.01764449124874	2.72089781019873	2.37026319333631	2.570979407964	3.32354404331927	3.19420240364148	3.25024751663739	3.0388796345997	-0.0553516078616125	2.89211342038113	-0.328313406022435	0.746843898654713	0.80526551120894	-7.82507106339449
ENSG00000007866	4.959956388288	5.29099701949515	5.31150321250676	5.43610618977593	5.29175052992714	5.84792337190073	5.36169739912549	5.04857428526258	5.35357445371487	5.40688930395993	5.12558591726492	5.30455713380845	5.88593305510737	4.76817793981934	0.085215720513836	5.31380187142547	0.560470909549858	0.582761238950373	0.66661532323919	-7.9177004157891
ENSG00000007923	5.68825822396614	5.710951648776	5.78407378106838	5.68135224047214	5.7297146641315	5.73646699960485	5.76671653043507	5.50631489695368	5.38023440011168	5.3163554596842	5.32965565973837	5.29451584146733	5.75576904953179	5.59783661203431	0.272676300703497	5.59130114342682	3.59956281105176	0.00233263924924764	0.00667698784162583	-3.09366653914231
ENSG00000007944	3.8052177727675	4.04213614963187	3.72842255646732	3.5378931432214	3.25236185356566	3.66305790188984	3.72644880507353	4.58736547709615	4.88103018017108	4.84458483452936	4.87718440968646	4.75021714698918	3.54683972034842	4.30314693085936	-0.847724969675272	4.11042192016408	-4.33296026717959	0.000491329704620762	0.00183155470909734	-1.33930992328416
ENSG00000007968	2.0268279862663	2.00497668196201	1.59928378350602	1.57473004969833	1.51913223940511	1.07505905475506	1.32679180108295	0.396296637105068	0.235462777810028	-0.322178559081339	1.32754383440699	1.48027015814618	0.560217940266724	0.483658565149534	0.990084522963651	1.0920052107485	3.87310074503607	0.00130193349337004	0.00409135877815821	-1.617210056562
ENSG00000008018	7.2353206326538	7.23543905068517	7.48004628676643	7.60438453252615	7.33967207826281	7.49320223215975	7.39285175312883	7.56190799601266	7.67519060458441	7.5254326971139	7.19738840544091	7.37275571543486	7.31153882769525	7.47803931502044	-0.049046949803361	7.4216550091061	-0.586370717655639	0.565638559922286	0.650818943880679	-8.0180298658949
ENSG00000008056	1.79616404219754	1.40380843310448	2.87660122186423	2.55587570451724	2.04470121703388	1.87959332259768	2.68206018663804	2.65014369683978	2.42351323365154	1.7789923648703	3.2514757070703	2.06515063976188	3.02135968717453	3.18733160546185	-0.452416147598091	2.40119793305595	-1.59429390801218	0.13002556629711	0.195220364956746	-5.95780480639966
ENSG00000008083	7.21280361645033	7.22493404866495	7.25681033159431	7.06674337005625	7.22852745763635	7.28781276430398	7.31723297452194	7.41321229987543	7.16071430167857	7.83577184305776	7.04627112935111	7.17963445501239	7.16251088092357	7.07413645119605	-0.0395734464870321	7.24765113745164	-0.381548984268745	0.707711327511495	0.773140164001652	-8.16022046013825
ENSG00000008086	2.61697100167427	1.36073228196135	0.939226412848551	0.414034955759203	0.91116668071294	0.162130458111397	0.920145205772285	0.322692534140812	-0.0477075567265222	0.378260208862709	1.55421721390107	1.16750742616317	2.19647060107015	2.11175169783381	-0.0512410232075606	1.07197136586323	-0.126480642285513	0.900894575639267	0.92733321042841	-7.39216107250149
ENSG00000008128	6.84086093136356	6.42997885404973	6.91894114066615	6.65828416010153	7.07555877135817	6.5551206198334	6.85052280289346	7.06908243602613	7.4188807409604	7.09057130319574	7.04536186937115	6.80054135899671	7.08987847306744	7.22169699590102	-0.347817729104309	6.93323431841319	-2.71552547302516	0.0150680909600796	0.0321011263915857	-4.37150908746332
ENSG00000008130	6.11035797401333	6.25902186409406	6.10043196008196	5.98674300443591	5.92508779038633	6.16379242604007	6.35567312328062	5.53254626828242	5.59370302708642	5.43758910661495	5.52230554352758	5.53055009667037	5.402337029099	5.69447494175588	0.601634422253532	5.82961529681206	7.57334316153428	9.80614278404043e-07	1.24680304159467e-05	4.97582503352504
ENSG00000008256	2.88698862247191	2.94820528188443	3.09890665147536	2.97932030823338	2.98250125395679	2.87984633968665	2.88174592129696	2.71860604164007	2.51654787720541	2.46774116930318	3.13402747188781	2.70430409702824	3.29303213210968	2.87731054907908	0.132367546200395	2.88350597980421	0.997513850620332	0.333057037020905	0.42388760823815	-7.10681713035583
ENSG00000008277	2.54857786598534	2.05782342567139	1.72972379556412	1.5750934238401	2.03417287180832	1.45588060252543	1.99170183381592	1.27275664063938	1.18015390070531	0.99564757011939	1.64908855345157	1.8297479866958	1.99675617399588	1.80531671434097	0.371194779424657	1.72303152565421	1.97513642376334	0.0653933000580209	0.109552905024938	-5.87421432020327
ENSG00000008282	5.86702616951974	5.52769655782276	5.57645349384964	5.38557335993739	5.34955588196406	5.42554970435589	5.51366502814209	5.83245292289668	5.65036522086172	6.06482921262971	5.60036161168	5.72317437364942	5.53379833273556	5.69157966153169	-0.206453802966046	5.6244343951126	-2.18089072884852	0.0441290835126273	0.0790892468608728	-5.906896300079
ENSG00000008283	3.6586603644572	3.05376482226057	3.06370059133283	3.01272969492436	2.61192232192034	3.18854129445183	3.5181049803317	3.98441213019939	3.95580632997332	3.53273295116702	4.37506054396602	4.02898864216959	4.62726719164878	4.3153900546265	-0.956755662032945	3.6376487081021	-5.29076685797585	6.82249218777903e-05	0.000361028488771559	0.930367125078609
ENSG00000008294	3.90377238353515	3.85730801848671	3.72165004786738	3.37534278769091	3.77595269382506	3.40123508139649	3.70543547396131	4.30836687908616	4.18505611606602	3.94808409421568	4.3529558112086	4.34802753863807	4.31128496404826	4.23200286278144	-0.565725145674866	3.9590339109148	-5.87490881545619	2.1554286504415e-05	0.00014113257970998	1.71116375673333
ENSG00000008300	2.74944535551245	2.90612674671913	2.40736927654323	2.51094844453876	2.03018583805714	2.50754983666137	2.50270304490038	2.74853999103506	2.56975988362758	2.83738759718618	3.18527646362073	3.48071981690672	3.09948297323106	2.91458839726947	-0.455555601425417	2.7464345475578	-3.13580284925895	0.00625369883595544	0.0152869589340056	-3.92407058045736
ENSG00000008311	6.34694036192737	6.174781072795	6.0933276603765	5.84961748758194	6.21883359588642	6.54120500380496	6.30772246905757	7.65922250615513	7.57602265339716	7.6206832804092	7.21086412357978	7.93967600023586	7.16051040254576	7.15536339601954	-1.25583392451972	6.84676928669801	-9.601264803959	3.99493233419782e-08	1.07571507609561e-06	8.17976816689584
ENSG00000008323	4.28666394206848	4.4356461633714	4.53078869748804	4.65743525002841	4.34601403884267	4.42874485860988	4.47623692713493	3.69725630895099	3.64145305785011	3.8537214182004	3.57139764122693	3.75685417291374	3.18146791681741	3.65039971471079	0.833828795800646	4.03672000772958	8.10840303002656	4.01275177432022e-07	6.15103297799136e-06	6.08617213333215
ENSG00000008324	5.83368247814175	5.63324511992039	5.98699762563462	6.07142345265445	6.00497075845625	5.95467090463542	6.09166236820529	6.19804188124897	6.28169738747054	5.92989758738424	6.00419381290717	5.51330970104802	5.36948734572213	5.67933797975525	0.0862606456370791	5.89661560022746	0.623829594925578	0.541350186164322	0.628759720947224	-7.7499530362898
ENSG00000008382	4.11155246163309	4.58981008003547	4.63323618078829	4.32820062766045	4.70130069493027	4.89189179926014	4.62503081674317	4.29154312554456	4.24179688620803	4.34140428082594	4.38576787228879	4.49670065501056	3.7091230961731	4.08797072221557	0.341965926710913	4.3882378070941	2.4464940777959	0.0260851049542138	0.0509438081511131	-5.08026218602192
ENSG00000008394	6.98645009776069	6.91166219478667	7.11456947230398	7.14977846321454	7.10560467593481	7.12938073305056	7.15312749755986	7.27564449733737	7.23579155525362	7.11470172655504	7.09815660530565	6.9613381484935	6.76512276601425	6.93216482465761	0.023877300258766	7.06667808987344	0.295161283212387	0.771587663624201	0.825001621186871	-8.15895800326965
ENSG00000008405	4.02928973031804	3.42612807222698	3.39760933143241	3.48509175488806	3.62879343503645	3.45474431621582	3.61425712614265	3.8704428227745	4.02029977719329	4.22686878206937	3.95963272375006	4.10449145439358	4.15915893749721	3.92898671765712	-0.464418135069513	3.80755678439968	-4.64116262410482	0.000257745194322919	0.00107690242365405	-0.707209107215792
ENSG00000008516	4.44043430442482	4.51958093666969	4.40927016983051	4.7022249686881	4.5442766763388	4.74879512039597	4.32138829584192	4.22186541959259	4.18666600213391	4.42986933152227	4.76188714429463	4.58976248446587	4.68309183869212	4.80749571092842	0.00986822906301654	4.52618631455854	0.0834173526488075	0.934532969837214	0.952060078423486	-7.81883010052448
ENSG00000008710	3.36583888972488	3.46890147671456	3.09896715372806	3.19220909068302	3.30440901915364	3.94708443181907	3.45262951299006	4.13609572010736	4.2500711037223	4.66571268136518	3.4918471385578	4.08826211594751	3.94836431693328	3.58635653866413	-0.616075279712254	3.71405351357935	-3.52419560775293	0.00273935621040988	0.00762854046412022	-2.91172173804223
ENSG00000008735	2.28229419487987	1.57006392024002	1.56084175057146	0.886435484013024	0.895127402276492	0.590843659883738	1.29011690375192	0.21648316545794	0.396702151550643	0.84397010526597	-1.03514903286361	0.149481848514315	2.28392954034107	1.77367632918426	0.616323571317913	0.97891553021908	1.4939596792372	0.154243042198584	0.224341786161445	-6.06814240728653
ENSG00000008838	5.64817103590022	5.86025815766992	5.7461535186258	5.88538761429998	5.8363493577032	5.79281435755169	5.7518023338354	5.375127149365	5.34564165993612	5.34134541528181	5.63107178324861	5.41460058259218	5.42645508999395	5.55454082988835	0.3498720998452	5.61497992042087	4.91031257728504	0.000147778928942261	0.000684405382099032	-0.175466924939644
ENSG00000008853	2.85444364545099	2.71127313500674	2.52824263571075	2.55899773447854	2.52851774796357	2.95163062771562	2.54078151751875	2.40578571682255	2.49229656073263	2.64342824792039	2.78540132998005	2.00960605070853	2.640235736161	2.43747390713719	0.192352904870665	2.57772247095052	1.60391836037463	0.127881593474075	0.192333525709754	-6.57517268371512
ENSG00000008869	2.36231065106574	2.17953871446719	1.85859854730992	1.84476806811813	2.13181256538185	1.6394674348224	2.11803362541945	2.60764474469446	2.51239149023014	2.38399841223791	2.80819545555282	2.65301722279335	3.10985744671237	3.21140007755247	-0.740507449272116	2.38721674688273	-5.07786622361458	0.000104929127139131	0.000513942667496436	0.301439088436114
ENSG00000008952	5.68550836281259	5.67571210333128	5.64909365675905	5.40049833529134	5.43840070871335	5.32730541911772	5.60611557666727	5.86153823799066	5.73748268686753	5.86250031061293	5.59936444830693	5.32497459701027	5.92593263132502	5.64475176728467	-0.169093810365966	5.62422706014933	-1.7270025889768	0.103017364758595	0.160294598117727	-6.66142422855748
ENSG00000009307	8.33367697410899	8.36716383896257	8.39038878963639	8.33819161736803	8.37372523626673	8.21440935025254	8.40965422030158	8.11073538713434	8.12579981349298	7.91165291474925	8.14161126013194	8.29478656649822	7.97065566169578	8.12228331162458	0.24957931636442	8.22176678158742	3.94883326692267	0.00110813459677038	0.00358428703422239	-2.46501803773646
ENSG00000009335	5.14188462391371	5.08848466927534	5.078682708124	4.99725240140798	5.10809522444195	4.87282418190846	4.94690528303513	5.0076514145267	4.9938667853497	4.74193137622401	5.13573196711538	5.0582601788344	5.03978447288756	5.0310582073313	0.0314828186914582	5.01731524959826	0.443747155170527	0.663044604844803	0.736104705424254	-8.0457345690538
ENSG00000009413	1.30353170604098	1.21865106207598	0.891796724122218	0.790182087529509	0.978947426713804	1.28374167068072	1.02594364246368	1.11193118054752	1.17442341469074	1.00280804470512	1.05398891284669	1.34265286348467	1.1237459755917	0.978994080292502	-0.0403438252565502	1.09152419941327	-0.385075733613288	0.705147028421029	0.77111398528933	-7.69629181161482
ENSG00000009694	-0.532134089570161	-2.18478911330196	-1.76462186852787	-1.05475198365396	-2.22060057242052	-0.524792877768888	-1.66367774402925	0.0759761166073689	0.0100574677577288	0.52542765624084	-0.449461228938902	-0.283856586472151	0.798887962648314	-0.0610769166733975	-1.50429332384204	-0.666386698435914	-5.14644419737583	9.12901793890849e-05	0.000458750112859023	1.01033903007015
ENSG00000009709	-1.33857544537516	-1.9547756584231	-2.50173234907696	-0.20792208456311	0.276360509077541	-1.51284828121488	-1.85294309050027	-5.15210431096809	-5.2567971262372	-4.69949611304522	-4.71742730172844	-5.99024765948582	-4.73446892540204	-5.98126523079016	3.89438696093199	-3.25887450483807	7.55452196537267	1.01261231348999e-06	1.27582861982263e-05	5.86441340141082
ENSG00000009724	-0.943078785130762	0.549116567147612	-0.129191502780068	-0.0320727190977721	-0.0865401027651338	0.406807347688023	0.779060733402025	1.09054556504994	0.808824080475667	0.724333683760455	0.106528733579532	0.211143079687245	0.464415508536194	0.985901081989234	-0.545694473392237	0.352556662253014	-2.19171738141736	0.0432094701028333	0.0777157470993917	-5.03725622310812
ENSG00000009780	2.16577244568444	1.73035736556244	2.34546908733854	2.36953485432759	2.72751197091981	2.49382954719777	2.36255496511295	2.57912745692968	2.60328911377044	2.75036377548238	2.59792321104451	2.83924929830089	2.71292715181356	2.86829543908898	-0.396830458638703	2.510443263041	-2.98847342878078	0.00853137021746645	0.0198765901448668	-3.87122719075969
ENSG00000009790	-1.04309528857071	-0.694305616375992	-0.301956867138612	-0.169460433372943	-0.38564194453326	-0.195530235896883	-0.500295954500977	-0.254095349323936	-0.19316673080487	-0.101382283875271	-0.0464275096932099	-0.40381381242259	-0.980418551999584	-0.269519956322994	-0.13655850174399	-0.395650752487988	-0.740592846916285	0.469448356455552	0.560657045081005	-7.02976637881272
ENSG00000009830	3.57694319767865	3.43898069541009	3.46564474897511	3.61030456204235	3.68228622275403	3.48686529676266	3.74279212405948	2.9997730975383	2.83482860553413	3.03911901031998	3.21189933224557	3.19007271510216	3.34976430162259	3.10719073020795	0.46447864824838	3.33831890287522	5.43326084583159	5.13025208098776e-05	0.000286029766732488	0.886875245980185
ENSG00000009844	5.94286117190179	5.87439101851196	6.04231342303895	6.06001483289726	5.98750293172389	5.92214952276489	6.02356439678645	6.25949759031912	6.27416186664691	6.11849054916511	6.07347092937907	5.95165898887637	6.01486883702316	6.14936723376389	-0.142313511174063	6.04959380662849	-2.03686149713401	0.0581993195218304	0.099696540168923	-6.11902144829652
ENSG00000009950	-0.0263768370607378	0.558974660360016	0.113281721678417	0.118461983177895	0.482797574598964	1.61862704803521	0.555839005108497	1.7031214234385	1.61855578736098	2.72567984423753	1.15705874159995	2.15517870284329	0.290170939298539	0.874962938936544	-0.992284173457288	0.996166680972399	-2.80021804857601	0.0126438478137297	0.0276230967045241	-4.0104526406916
ENSG00000009954	6.30624972632284	5.70590215234138	5.47269997235838	5.4785317811787	5.66016654157157	5.35543438046558	5.54533862090847	5.29160747634273	5.20084906361048	5.39483965397867	5.69836039679791	5.58064207309626	5.85275386496822	5.63210621645191	0.124320712785557	5.58396299431379	0.914573260875313	0.373713345809115	0.465554261191682	-7.74401522651352
ENSG00000010017	4.97890683914527	5.23233179858131	5.14468614037509	5.18015415481612	5.09507393943123	5.07732407338599	4.97968019175577	5.1666413409699	4.97882651743498	5.1604290252664	5.10226012471849	4.87231440326483	4.73368878874469	4.79345396561475	0.126939354667122	5.03541223596463	1.49792601226766	0.153218817078495	0.223172118557009	-6.95459013931765
ENSG00000010072	2.03660895130795	2.55917867737888	2.46517613445188	2.382159531294	2.44140467824009	2.20763161016255	2.25013739938038	1.89136625118172	1.92699365213334	1.83921673345113	2.25231364021152	1.53725843593025	2.21585662634559	2.10330480963518	0.371157209034279	2.15061479507889	3.03996745688672	0.00765552608187361	0.0181823016174631	-3.90481737733897
ENSG00000010165	4.39747110118502	4.23072662778499	4.67057658988765	4.43475305771837	4.42701872009932	4.32787710143188	4.61381439533018	5.1052571935977	5.14886435820886	4.98314009757811	5.25068296745324	5.08733820881872	5.70717789746644	5.46956561338942	-0.810017881809881	4.84673313785356	-7.06440500526164	2.37572900978043e-06	2.45666930994372e-05	4.08521695278185
ENSG00000010219	1.14665670427289	1.68016520940113	1.51599449560458	2.39516208246503	1.98053290806972	1.91896012082538	1.7647780153991	1.18167297731389	1.10678894115997	1.56271700495377	0.376889825929607	0.507756136047414	0.37298815876142	0.825366924948549	0.922429983219712	1.30974496465375	4.25012040544658	0.000585096370743588	0.00210499790964239	-1.03854804360871
ENSG00000010244	7.8274524645167	7.92115095496946	8.07814742892093	7.75798243754386	7.96359381942894	7.85396721880045	7.84883774938348	7.87211350439797	7.92451288859149	7.55455443924128	8.08669060132311	7.41822107019575	7.94193633909234	7.97176883460207	0.0699479122882156	7.8586378393577	0.704880677797385	0.490809449799801	0.581432919360851	-7.87798097575868
ENSG00000010256	7.29738945932	7.58679367264098	7.69551778169081	7.62455243439814	7.46750362288525	7.75619248186483	7.59318310114825	7.40885294164713	7.37202301764744	7.31494148899951	7.35302366405666	7.39471886026437	7.32499396560165	7.36699594006085	0.212763882064321	7.4683344594447	3.06644613700767	0.00724004211391009	0.017342757836725	-4.25756629641783
ENSG00000010270	3.67977192966466	4.23013491142363	3.98730743709088	4.00252323170889	4.00932895057497	3.94796578272549	3.84738089385882	4.55585969001177	4.52908615729768	4.59359595938043	4.20778693115014	4.27895167767755	4.28129190578719	4.22591530768213	-0.424993960026733	4.1697786261453	-4.44743164877702	0.00038628886994638	0.00149587077191136	-1.15951293560679
ENSG00000010278	7.20101561181113	7.39381614576473	7.47842291367616	7.61655753090826	7.36056421844688	7.42880173943954	7.5244715460026	6.455523815303	6.39726822644401	6.84269550494752	5.62624041258219	5.95839973278757	6.09706443298424	6.19225922181577	1.20403794978364	6.82665007520811	8.66771621954023	1.63907448009633e-07	3.05500390463285e-06	6.71226874799051
ENSG00000010292	7.25381364959442	7.43629262885355	7.35759967484202	7.28337584144726	7.26807685271708	7.25394400238763	7.33336963350724	6.23534926615335	6.32991388676875	6.06735743416899	6.6479565978588	6.92941007322642	6.27768042510724	6.72050271374116	0.854975889524351	6.88533162002671	7.64190580445281	8.7271035137259e-07	1.14705806550279e-05	4.9528430434055
ENSG00000010295	2.85074824268721	2.22005304614793	2.46954172085651	2.55006483411705	2.72694356277411	2.62029337489911	2.69470129397312	2.57614908373312	2.93503342502598	2.82072488775039	2.63330964500185	2.24376949018162	2.6358297026891	2.61658689094957	-0.0454571877462877	2.61383922862762	-0.379312764274498	0.709339166189067	0.774779412338431	-7.72659972957022
ENSG00000010318	0.0683239908002873	-0.234613533325432	0.248009914940563	0.147953807279974	0.312020585217316	0.716235762013373	0.503952256328366	2.36851373455742	2.33130817068112	2.24878095276255	1.70993468300652	2.11685492968244	0.71094866167291	1.60769200111347	-1.61274546220612	1.06113685119506	-5.95227071665231	1.85655746126094e-05	0.00012581629590637	2.50539997864732
ENSG00000010319	1.39054127496689	1.26048529744333	1.52530213268018	1.38353541194054	1.47070567245608	1.29806938056558	0.682505953748859	0.327297613698987	0.141359440695369	-0.310380409548992	1.05121853633735	0.0767576357352119	0.55612271808472	0.351919730123619	0.975672364209573	0.800388599209123	4.84452996004128	0.000169184714582139	0.000760306248055366	0.423499363000497
ENSG00000010322	5.4613200443436	5.36192727121791	5.44386356184775	5.34653712171133	5.53015146965618	5.37684772931964	5.45850826982529	4.08020841152279	4.23789057922836	4.30747215537626	4.17864136095668	4.66132470554121	4.55083711528284	4.47290482578685	1.06903407129157	4.89060247297262	12.3913940928952	9.9845485087111e-10	6.29024616119041e-08	12.0800479715369
ENSG00000010327	-3.38136768537194	-8.30066136942558	-3.06131727949822	-3.19298993022999	-3.59095835742247	-1.86356920852448	-3.39506069370176	-1.88573672822167	-1.13759286324633	-2.41883741964727	-2.01544263119759	-1.507386601483	-3.55562239486078	-2.44704444535669	-1.68327148610856	-2.98239911487055	-2.44554793906859	0.0261348156738377	0.051016333851849	-4.29350943892529
ENSG00000010361	4.41211890093235	4.74878296566524	4.90805605050187	5.00827215711027	4.8981528058526	5.14970297439312	4.89072107045247	5.2381303603319	5.31754204517754	5.31911103268338	4.8172744806303	5.10012016670192	4.64393518480216	5.24078878111809	-0.231808146335794	4.97805064116809	-1.71491748441292	0.105257812745664	0.163266569631917	-6.3754219909223
ENSG00000010404	4.59444939462425	3.87696605007023	3.41451189771865	3.96872010053617	3.91718369173932	3.43851503370747	3.82279367857112	2.82133660891689	2.4626197823105	3.08379942237158	2.83023016451602	3.4065561840861	3.27893409183034	3.0824695033843	0.855120829119314	3.42850611459878	4.64197524989901	0.000257309933831474	0.00107545302357928	-0.507126163730018
ENSG00000010539	3.72450712564711	3.63515797343608	3.4290617112326	3.79536952842571	3.44933712782094	2.99161578133549	3.42606728129242	2.45843759785288	2.83174155041292	2.66690203998657	3.27757205082811	2.17858161955843	3.36299225289703	3.03845449616396	0.663518903649395	3.16184272406359	3.52405017280939	0.00274020576003417	0.00762854046412022	-2.64024177722495
ENSG00000010610	0.426565908057351	0.686684163108653	0.629240245804509	1.63029953407459	1.41368348654953	1.76384188948296	1.41163435745985	1.40766640103738	1.38506137689339	1.41994056104779	1.12290381984209	1.10886139895043	-1.14753193311131	0.0989104850891787	0.379308062754265	0.95412583530617	1.0180858731962	0.323473633743538	0.414072107308856	-6.93775193606149
ENSG00000010626	0.327078750864311	0.571982522004682	0.413435148318276	0.516548155523599	0.606992960107659	1.05456278277253	0.974054719480397	1.1823484088475	0.951808468878262	0.926262962406154	-0.139707521724748	0.0871204300365427	-0.0396456496780293	0.684326204423187	0.117801183311343	0.579797738732881	0.504470199458336	0.620664845210619	0.699131127353859	-7.09944778249116
ENSG00000010704	0.0644371542279736	-0.371158545989757	-0.414316048432979	0.228423184950888	-0.00638285502393399	-0.19398408163407	0.51357871330862	-0.221835743776803	-0.0219493826755122	-1.42188773462289	-0.251846325235219	-0.376545247955105	-1.1210706052015	-0.0955986947849781	0.471788337617994	-0.263581158060376	1.9013030676333	0.0750443842064561	0.122945914682565	-5.37427415489573
ENSG00000010803	2.94041209300218	3.00202953816162	2.66933361483209	2.69379475527274	2.73285494753124	3.21272297669538	2.83105559607127	3.23634898719246	3.26288814992949	3.21722346197907	3.00931719531365	3.47341853921977	3.00338524413535	3.18035910004005	-0.323185018318587	3.03322458566974	-3.04939084767825	0.00750505329140019	0.0178796109147445	-3.96784506075119
ENSG00000010810	4.19766650448831	4.39807069324356	4.25414563469139	4.43090282361247	4.55952948803661	4.46159103878982	4.2910535690847	4.87574950095014	4.84979101511763	5.15242043703581	4.78812341652273	4.6636052280763	4.42571326949058	4.39948618957894	-0.365703038408244	4.55341777205136	-3.36542954342504	0.00384177820813256	0.0101153051480827	-3.56892372443027
ENSG00000010818	1.46749016548194	1.04025910985149	0.972995331037081	1.55839450649797	1.15642851812282	1.39813047026318	1.32133070920366	2.33652296135784	2.55066621871322	2.18013096974762	1.53014922789896	1.96121398116915	1.37046200047548	1.68186554542513	-0.675451111184868	1.60900283680325	-3.57122986749712	0.00247793977224778	0.00702515838994358	-2.5977459887882
ENSG00000011007	5.07008144110736	5.04317854420423	5.10476850214215	4.96939077086832	4.92408200943146	4.91546318109395	5.08701133657545	4.85649506330866	4.99943206704522	4.56880784863261	4.85325057636765	4.40803644584199	5.09407274998041	4.99230483824647	0.191521382017412	4.92045538391757	1.94515991011004	0.0691684717335436	0.114771570479749	-6.32944949247499
ENSG00000011009	6.81467192003825	6.90397967101725	6.86927774992294	6.9101652103037	6.75054209649276	6.96319501277179	6.8253933942351	6.77505267398501	6.69754750777065	6.6128135610979	6.75179377510475	6.37163548806215	6.73690910604152	6.78775326969373	0.188265808857943	6.76933788832411	2.52983019766843	0.022040891910511	0.0443038307915491	-5.23219346609434
ENSG00000011021	3.72147748011399	3.56958497424286	3.10695213786005	3.21632200267422	3.47962982993349	3.43357932369725	3.29104572918369	3.5523503475065	3.3653789430653	3.34018296562226	3.33878752033882	3.38678586831837	3.69786636952513	3.68035302475482	-0.0792696377338222	3.44144975120262	-0.76794890774052	0.453471936221196	0.545053025454096	-7.69626640518405
ENSG00000011028	2.69445906547441	3.22524617530354	2.50430456895561	2.83282229826797	2.60798172355093	3.48374235956364	2.75125162752534	3.34962328289411	3.6303335701082	3.71322323581274	3.6942745944038	3.72013836831396	3.38507418764273	3.13141313119811	-0.633621341618726	3.19456344207251	-4.28442410271374	0.000544241338440117	0.00199345822714861	-1.46636691554691
ENSG00000011052	5.91671032742439	6.17711479116854	6.28072021651368	6.47830021670771	6.43023682432121	6.59664548958532	6.09129224104709	7.6407843862385	7.81028495196265	7.68756395857512	7.49691790147782	7.56804222885532	7.3997192963777	7.38284016482342	-1.28712753414361	6.92551235679132	-12.3543040139915	1.04390906000657e-09	6.48235569864283e-08	12.0554279949449
ENSG00000011105	3.32268728434723	2.47215058266232	2.59178893902422	2.92283404724688	2.52263985380567	2.57374843019962	2.96721751994931	3.02939911155036	3.06080340648072	2.3719538480067	3.69254897507145	2.7920499072066	3.60523374521909	3.39140170875739	-0.368859856532789	2.95117552568054	-1.79072925225261	0.0918771766567504	0.145850673938869	-5.97348690940967
ENSG00000011114	3.4600347085399	2.98370741257328	3.08549263230904	2.98256253548709	3.04274093378107	3.25101491357079	3.14919583588293	2.67620973684979	2.76975050819928	2.73532324596139	3.34075673291558	3.03524371709112	3.52642389125315	3.54477253984609	0.0526054517703103	3.11308781030432	0.357625822529089	0.725200305392743	0.787791227859254	-7.92392391451644
ENSG00000011132	5.06750108472285	5.1612288325704	5.18707319127315	4.89472321931109	4.99198191534145	5.17368357553016	5.06511296085364	4.10899608233999	4.27044801759277	4.05966494557824	3.77008086270474	3.91158550376648	3.96009564323952	4.37773613289354	1.01591720229647	4.57142228340843	10.3241191427098	1.43009932868509e-08	4.78179640918305e-07	9.56444817516998
ENSG00000011143	4.58006107157379	4.77294497903822	4.68624755511325	5.04810364899818	4.89716915897195	4.92709587929788	4.58593341289375	4.27933905860978	4.26295157983439	4.44375550038312	4.22707733420508	4.25832668635009	4.05831150510483	4.15650905476064	0.54588744203684	4.51313045893821	5.90483176533467	2.03431710230426e-05	0.000134636614747934	1.91833887529038
ENSG00000011198	3.95105736921497	3.38769886888825	3.41191603109796	3.54874207103093	3.64451722133784	3.50309648462714	3.40308563525719	3.10087993570186	2.80794137030178	2.71848438747199	3.16805410198046	2.94331314256236	3.25829503546642	3.17560267111849	0.520186128423239	3.2873345947184	4.40469337401319	0.000422534171211346	0.00161465098832442	-0.986956391425122
ENSG00000011201	7.5249760154469	5.77232268003952	6.20398682598547	5.58971551590934	6.15671477821563	5.34270771824284	6.67044173102807	5.46001120714083	4.91468110727496	5.39477023957944	6.014806515823	6.52302732658821	6.20880207498389	6.38433148760673	0.326855923925851	6.01152108741891	1.03263725019382	0.316814648620659	0.407003492544019	-7.34723960335575
ENSG00000011243	6.6661623902796	6.87826438768248	6.845824080405	6.98061847124083	6.9573063791654	7.28560096268556	6.94694253413665	7.01168867427249	7.30738342330674	7.38556125265655	6.85701766653491	6.85282602131016	6.01867818747879	6.66605486127998	0.0688520717206558	6.90428066374537	0.411529355966815	0.686031174554128	0.755103015985728	-8.07359255351373
ENSG00000011258	4.73098125199785	4.65071373665842	4.39636251634416	4.1187842535277	4.33540884390032	3.73861131108809	4.47918915026566	4.02265174608957	4.0933773309219	3.39576333825277	4.72950702334928	4.83339238020661	4.86012348433494	4.97170464172251	-0.0694451321494274	4.38261221490427	-0.304776350518889	0.764383672015448	0.818934361960198	-7.95353626598431
ENSG00000011275	5.29760205182439	4.93344029664646	5.11450970511672	4.99422837203004	4.95556526225938	4.974930437634	4.99302423884975	4.4562000798125	4.52553172265389	4.48190603911629	4.39598767375129	4.7322829680017	4.59336941711037	4.73240724899672	0.477149761392436	4.79864182241454	5.86147557303015	2.21220464111008e-05	0.000143751963091034	1.76172018120753
ENSG00000011304	9.11982394984704	8.99751068874078	9.13266880038724	9.03766082935176	9.10642809117416	8.91168772622232	9.03717643198405	9.06318407473085	8.89667387562166	8.64317500961129	9.36449948498093	9.04363382043803	9.30784573121007	9.3642237481829	-0.0489693630023567	9.07329944732022	-0.475898139587941	0.640446605324428	0.71670426934568	-8.06002751232771
ENSG00000011332	1.85660050766122	1.49988873290177	1.82378686658033	1.72511600869217	1.9742244816188	1.84254220007195	1.99457779600847	1.12181411170409	1.2094018128933	1.17210614864385	2.05713905868055	1.13203558006003	2.13336782776136	1.75485746883337	0.309456372085312	1.66410418586509	1.60811701834075	0.126955744130911	0.191211281006969	-6.05674839451038
ENSG00000011347	1.61781804428814	1.99925578043669	2.04757885017532	2.13123320193579	2.02019350671343	1.92475378434361	2.19534724577514	2.7551306990853	2.16503036119173	2.60435008308064	2.90956450410529	3.19055569717585	1.63228186850627	2.28302293996531	-0.512078644386717	2.24829404048418	-2.3984177906416	0.0287272833637292	0.0551134561506854	-4.88676970433205
ENSG00000011376	5.477663084143	5.15839751535479	5.02242972410032	4.92054501269364	5.10603418218273	4.7157357829493	4.90023844742556	4.92943111308035	4.75122754748182	4.52594290254441	4.72497169398927	4.9186787769318	5.29457119551534	5.28370727092822	0.12149040003852	4.98068387495147	0.925338660740664	0.368253365241846	0.460165473137424	-7.69615872141702
ENSG00000011405	4.57510956778644	4.05175294897492	3.80812603352746	3.680441818868	3.96973341446896	3.88543102978861	4.06260113619266	4.62747000740002	4.76867732211892	4.6746922867244	4.88011767456553	5.02320221907433	5.3572147551406	5.27474762917038	-0.938948857472642	4.47423698884294	-6.68879825047632	4.66834871276194e-06	4.1747591611334e-05	3.25965991268626
ENSG00000011422	3.24150895047219	3.56777487881941	3.463128122279	3.67662449179537	3.81258258990793	3.50689573192312	3.18443214720203	3.61444138228735	3.09098840245086	3.87478100442661	3.34197549500429	3.11466457443649	3.14961949542758	2.82666130040733	0.200816854945428	3.39043418334568	1.30414482074963	0.210254831433405	0.290433725272497	-6.85182467325696
ENSG00000011426	5.25130147135229	5.52135116341119	5.44228530924345	5.17623809227029	5.38131410884399	5.37602733884812	5.27701708727763	5.2583240324692	5.26807982045226	5.39522095576905	5.36971875904233	5.63613984955602	5.67485566204569	5.54198799923988	-0.10253514357365	5.39784726070153	-1.23586083816464	0.233980942968235	0.316701741199554	-7.39924559881329
ENSG00000011451	2.40856879675569	2.80059346889954	2.64271190354744	2.7057358200453	2.57537781336324	2.67045486891552	2.6610560247637	1.94010768383015	2.23310818760886	2.18756051819343	2.34714083935596	2.00295261260134	2.57691226660979	2.56700945872718	0.380549152138783	2.45137787594408	3.14039086263366	0.00619331906544582	0.0151803282777131	-3.57478130689629
ENSG00000011454	3.47578063867839	3.11399372417252	3.00260132926102	3.01235235384096	3.24907153672067	3.04950698051143	3.19572412832216	3.21536261234992	3.28347661044438	3.22351288054143	3.58400328546689	3.76052246301631	3.27306116624009	3.50977310306505	-0.249245186083638	3.28205305804509	-2.35395292419537	0.0313932929841135	0.0594041929274946	-5.46293191244531
ENSG00000011478	4.3326582716867	4.07657718550885	4.18220750040722	4.49621730700668	4.56630240502969	4.35456747297715	4.56653608850958	4.70651208039909	4.68314748708298	4.26775801813143	4.48282374100366	3.97063035492277	3.90462370562554	4.5418181306117	0.00274339679544511	4.36659855349307	0.0185715606582448	0.985407748522427	0.989204419223976	-7.67763300355338
ENSG00000011485	5.49427219965844	5.4262599766024	5.62233959208396	5.68778470285559	5.64083313315368	5.833705969496	5.58884328209258	5.35444371999385	5.29004613428813	5.28782501954978	5.21482917923806	5.11301102311751	5.09134053958654	5.18229915921469	0.394690456328265	5.4162738307808	5.45227693188356	4.9396867993552e-05	0.000277076701519892	0.806581578919413
ENSG00000011523	3.79654021173378	3.43497784108441	3.71926927030566	3.56167929590983	3.85518480060388	3.58579055622779	3.71673129729713	3.05528497335622	3.17172762487254	2.94941809158843	3.53291631859817	3.23280177148176	3.49891487730437	3.90275668482269	0.336336068820459	3.5009995439419	2.52576042358763	0.022223734301692	0.0445903511681328	-4.95374030959998
ENSG00000011566	4.65852457429593	4.0728231917706	3.92278368364425	4.20065214509812	4.1125233048109	3.78422061167385	4.25677629432768	4.45238383356971	4.33720903509882	3.89135869459926	4.73287501233852	4.5932090196209	4.45332610643431	4.48595973926512	-0.281603176785577	4.28247323189628	-2.076269109476	0.053990132669083	0.0936860428735969	-6.01650438943455
ENSG00000011590	0.972151471198388	0.193456561875652	0.646039697433939	0.591677753072676	0.252400841276612	0.292046475977269	0.530236650373637	-1.20249446797992	-2.05012796033362	-3.19217413336659	-2.22552072651098	-2.64053581906728	-2.50684235745377	-1.01410905605321	2.60874308847492	-0.810985362111228	8.85476734043794	1.22531021324522e-07	2.43680565447836e-06	7.92783183558763
ENSG00000011638	6.42596797837213	6.25031757540432	6.33693017648718	6.45689932093265	5.62106769323949	6.48290629848302	6.31098845522779	5.07768196861572	5.4283881415616	5.35257017780451	4.98823740643082	5.13729416580971	4.14750716390731	4.78176246905873	1.29150738724675	5.62846564223821	7.32343652066811	1.50772264180781e-06	1.75434916572112e-05	4.54736425795642
ENSG00000011677	2.77292759096228	2.81477066759631	2.35545582054051	2.21036957854818	2.56431285947214	1.61171678950226	1.91669094934305	1.13578470054424	0.759476884658041	0.105755586157923	1.89651017712268	1.69769870588983	1.1073149607906	1.09289192045166	1.19680645282638	1.71726265654141	4.597839873504	0.000282072781091312	0.0011578778477782	-0.220778567470074
ENSG00000012061	5.62615799810738	5.56999333224982	5.79757108203585	5.96399011607923	5.81707345980128	6.05390040801545	5.83359372264449	5.47868132419212	5.56783717805424	5.74747146992046	5.32340955284242	5.18887954675238	5.45774817148547	5.38166252993195	0.360206674843197	5.62914070657947	3.80656466832141	0.00150018700362658	0.00460201421983736	-2.63864646123879
ENSG00000012174	2.33771870110238	2.26140160206788	1.97806844950898	1.92851546064371	2.16846824703422	1.6376677501646	1.97587832706678	2.2895260068102	2.09393700453102	1.74343482347513	2.63621944247816	2.37875411357851	2.62328072640166	2.7731885634297	-0.326501595303109	2.20186137273521	-2.06978772176193	0.0546627880936728	0.0946508456235727	-5.76522806050666
ENSG00000012211	2.6322501780605	2.19438981489227	2.18657547820451	2.68029485163277	1.81220205323259	2.61630743469897	2.2990535698998	2.51924267857791	2.51123576302254	2.73528331583176	2.38859073020262	2.35216036118697	2.08725649907847	2.34902410989884	-0.0653745607396723	2.38313334560147	-0.404818662786134	0.690860312823171	0.759337494016507	-7.28288379390802
ENSG00000012232	4.93883692430739	5.05060845738587	4.91696267335002	5.03285156917155	4.89861716113822	4.98043751426103	5.00099547430373	5.06091084191589	4.98220756429546	5.30789477292815	5.29381101652367	5.1584492891649	5.76651841294523	5.05425647786955	-0.258353080036165	5.1030970106829	-2.55284130839094	0.0210336768337136	0.0425816501568743	-5.27283833175137
ENSG00000012660	6.34358779050061	5.78420426762394	5.85696957417887	5.8216955580968	5.92173803596117	5.73296801527646	5.78106273731626	6.16403563152838	6.12552260777397	5.71259459541464	6.34049519397489	6.55334770583875	6.17761658913188	6.22089363810333	-0.29622922599679	6.03833799576571	-2.48760890184351	0.0240092088283051	0.0475743215510288	-5.30385897615337
ENSG00000012779	-2.9641279177407	-3.60036209579149	-1.35600101007286	-1.80874266383579	-2.18360846555875	-1.01127501803298	-1.30302870740746	0.262756318463306	-0.0352854488495151	1.39371574177086	-0.30115132824602	0.0227618502112952	-0.945282318366162	-0.925388437125428	-1.94809932944228	-1.05392996432726	-4.38848337195779	0.000437170747213537	0.00166327138616316	-0.306970151710483
ENSG00000012822	2.23126607233758	2.26487640956677	1.96844248504869	2.20455025875364	2.20182072701964	2.38833172893465	2.15294718115033	2.57497542777799	2.40579028884585	2.84358871910358	2.49515921238098	2.31155236965366	2.74776624267938	2.39971557740759	-0.336425383308276	2.37077019290431	-3.27431157803812	0.00466288015311488	0.0119126604415536	-3.46911275144968
ENSG00000012963	5.30164000842943	5.30090394475295	5.30380274756914	5.36956400078173	5.32068608690981	5.26998226517356	5.27597697082091	4.76419760274652	4.69564324824129	4.69932507825062	4.8772963889425	4.54324812199766	4.56691465174118	4.62764762910528	0.625344657281636	4.99405919610447	9.72575904264923	3.33397412113778e-08	9.37131617283325e-07	8.45569619730877
ENSG00000012983	3.68198879874462	3.89615539046385	3.81368447686277	3.64962745144164	3.53185792141699	3.72314105552818	3.71386456310334	4.37757267109117	4.22361561840541	4.35899101023131	4.07416704395841	4.22811867637927	4.24101616722377	4.11546412900924	-0.515721126660433	3.97351892670428	-6.75128595986462	4.16656246444552e-06	3.80714953113862e-05	3.4943599792775
ENSG00000013016	3.37970871650122	3.35980292517719	3.47789995442422	3.44152947449592	3.37649550217346	3.23136292443728	3.12904755609925	3.1082000662147	3.2917617789001	3.29349832808463	3.37577036620774	3.13514933677052	3.46364416150907	3.16265880162126	0.0805274588936054	3.30189499232975	0.957786840655966	0.352126516554856	0.443933274600078	-7.48297767195876
ENSG00000013275	7.64013504424212	7.49507912777259	7.69540282490777	7.52564938488687	7.61992322008244	7.84813203507116	7.59537600747354	7.2894847405808	7.35279713506582	7.17366383549157	7.26831902683493	6.77365120647617	7.53377158873803	7.636830453148	0.342873185608922	7.46058683076942	3.14358433589417	0.00615163044453222	0.0150981032749348	-4.07040414540126
ENSG00000013288	0.557445228901589	1.45430150066436	0.918890679401223	0.907721513671182	0.710334510307551	1.58019552391465	1.24911132488543	1.04829853859804	1.38214839464793	1.49714476701002	1.48485768469945	1.47376968468609	0.88574317115363	0.914561613598063	-0.16786355504	1.14746600972423	-0.889269627175017	0.386761478692247	0.478478751490479	-6.94774173446561
ENSG00000013293	-5.42122181822586	-4.52525498060376	-3.9327192999551	-3.76019609583155	-3.83971477229448	-6.05628314211503	-4.36722580128405	-2.42765665672404	-0.854462005425835	-0.64326263818697	-0.917230026078102	-1.99540773186431	-0.92783240173076	-2.26433347618535	-3.11604686830448	-2.99520006046466	-6.85732439660513	3.43956576718487e-06	3.30149487006364e-05	4.65660585258422
ENSG00000013297	2.70592700565723	2.73694254722189	1.86340448202623	2.77741799739855	2.40679016623147	2.67830183364454	2.73296971377845	1.20651570231773	2.28873798083093	1.83555951740017	1.13192238944059	1.10917675406572	0.245987929730826	0.137098094237885	1.42903547840028	1.84691086528444	5.34082665762167	6.17057504790442e-05	0.000332929895696375	1.06618564908028
ENSG00000013306	7.73578349739731	7.72804476641764	7.83051725764892	7.95391155976317	7.84712625991921	8.1521947737905	7.91844784676091	8.08819787573862	8.06763126801396	8.09579778135594	8.04414066633255	7.9362277566124	7.71312907825258	8.05683683005451	-0.11794714213749	7.94057051557559	-1.44617521949464	0.167034751553043	0.240163019628126	-7.1220025120035
ENSG00000013364	3.95307757403235	3.59639103723226	3.89226681680547	4.00124693036062	3.82115221556471	3.8198797637192	3.7797079987094	2.91941899484688	3.06432178132156	2.9577510176463	2.21932306541148	2.6997783478238	0.160875890297746	1.07252470618669	1.68401887795185	2.99697972428275	5.00530010494569	0.000121657286588105	0.00057952674562185	0.349556093200237
ENSG00000013374	4.41983455551418	4.61495900746377	4.64644952018887	4.64517119048451	4.68993431204104	4.65346621007556	4.66990750984251	4.159092921281	4.20176149944171	4.32335223677674	4.30074485854055	4.39354804489648	4.35003611927568	4.28244720982391	0.332943975879682	4.45362179968904	5.0199038695875	0.000118083419124392	0.000566940155488353	-0.00788115577958237
ENSG00000013375	4.22651696909386	4.09218769305672	3.95775109806369	4.012516726973	3.93535808394292	4.0829195488572	3.93233424978573	4.04446405665245	4.34717697294257	4.11188318703331	3.95116755041747	4.18976474728343	4.28792014168953	4.0773854079018	-0.110485950274027	4.08923903097812	-1.4405209869147	0.168604549981367	0.241962737628018	-7.07867638114177
ENSG00000013392	1.55270149932991	1.72941591168713	2.06009990165357	2.10917394965963	1.83848477974499	2.01437954963985	2.27225382625238	2.65967919899007	2.86923589085599	2.64687187579305	2.41654351937181	2.3439290700287	2.47663799520947	2.3467292786962	-0.599713744568638	2.23829544620805	-4.45638803073143	0.000379103503643541	0.00147179226247067	-0.693145122939867
ENSG00000013441	4.49420061819888	3.62543244157203	3.82180441736629	3.51522851727938	3.80366410641513	3.55764170569958	3.86741916076643	2.98654473172664	3.10562994566489	3.01319978001955	3.76849874362804	3.72835748015861	3.29358178738262	2.91560723043879	0.552515552557971	3.53548647616549	3.28623222818765	0.00454630700373864	0.0116638074499374	-3.54082025809086
ENSG00000013503	3.04916069057946	2.78854640200155	3.0777510462584	2.60778361479149	2.83397202354176	2.52512242338667	2.89220084962668	2.60516228858057	2.20591576989621	2.10685078399675	2.95690104363487	2.68995660154067	3.49779299915862	3.45557643391769	0.0313307814523593	2.80662092649367	0.154463427393427	0.879135904009684	0.911122426013761	-7.80676873247331
ENSG00000013523	4.401800414368	4.00783724404203	4.20307599198983	4.33130284343479	4.4795224145673	4.01786478430993	4.0461670384408	3.68945330712264	3.86469483699896	3.4040308298163	4.01151584911662	4.11403424591542	4.05244310662185	4.26295390629322	0.295364930485619	4.06333548664555	2.37695654292262	0.0299863295197434	0.0571004365652929	-5.49133335238875
ENSG00000013561	3.23716701669361	2.93664962801751	2.51572137294908	2.32460824658642	2.61890370633136	1.63711601704777	2.40560537928159	3.35238226599654	3.11813576777233	3.46272279916929	3.34218715755313	3.44429024805965	3.74051276935877	3.92973695293545	-0.968351816747235	3.00469566626804	-4.59516030419092	0.000283652345058084	0.00116161934444883	-0.22623050714791
ENSG00000013563	1.21973059940096	1.92078786662408	1.16422841410818	1.5530560358653	1.49395516310146	1.67929838847488	1.55814660307198	1.95459814209908	1.75935538831186	1.78364587607562	1.63472602867944	1.69492349976169	1.73335361300761	1.6355999872914	-0.229848945734498	1.62752897184811	-1.54568171959986	0.141325569891303	0.20864550110954	-6.10783826009573
ENSG00000013583	5.00944498895124	5.19697287831058	5.14078597299457	5.52664810834372	5.35712746832051	5.80083111829439	5.13836835535852	4.77510526575521	4.74664438101613	4.68083696748936	4.31985631484354	4.47267089215262	3.09990276172227	3.86200824233743	1.0359506111036	4.79480026542072	4.71059051116398	0.000223139216189776	0.00095560429283806	-0.608265406352091
ENSG00000013725	-1.63105697762511	-1.31374835235639	-1.20148817679007	-1.07001725985918	-1.41098878339015	-1.27256995965192	-2.34914886219884	-4.68227400631379	-4.42620912038688	-6.40980267947781	-5.38097927059375	-3.48921310207472	-7.69436452201061	-5.03210737398584	3.84089910721122	-3.38314060333679	8.38164201102654	2.57861297948824e-07	4.382425611803e-06	7.21850042467285
ENSG00000013810	7.18088478600465	7.33479859219954	7.46086313186381	7.45896398091543	7.28266002953972	7.7115806543799	7.49234250179521	7.36677291899056	7.78689656075445	7.52425124124326	7.11794258939044	7.17882815786935	6.90606238776732	7.2730228762712	0.111485194437879	7.36256217207035	0.938860036264112	0.361472928113881	0.453555361657118	-7.72274020749075
ENSG00000014123	3.25073875280113	3.53249404609306	3.38030844406998	3.25056658199576	3.36290990994786	3.4118626021905	3.2764661899368	4.16012952777357	3.98407033853708	4.3820060328505	3.87143387935131	4.00494289087245	4.10949790803714	3.80991527567675	-0.694451380888336	3.69909588429528	-7.4440038069155	1.22387978176805e-06	1.48958408238989e-05	4.81793064840276
ENSG00000014138	4.75202940067034	4.96220393140799	5.11353075340201	4.59880226987402	4.77453979317107	4.62374951306788	4.94806866191412	3.93392774357027	3.84481398135115	3.79534624354137	4.21915498201607	4.16243646345942	4.38413271704776	4.52870363928838	0.70188235255542	4.47438857812728	5.83907367203067	2.31035609575255e-05	0.000149332682110485	1.68206728339965
ENSG00000014164	4.0185437298572	4.05794636256083	4.19476706205086	4.12815096167426	4.24576958404675	4.3963148455746	4.17344714641395	4.02573055567063	4.23466387787117	4.2127412580889	4.05833790049705	3.66248490361923	3.92832804521023	4.16200240839816	0.139944528364137	4.10708776010956	1.42778230789806	0.172185593205985	0.246057397547264	-6.92764140532373
ENSG00000014216	5.99790862790899	5.97963791821321	6.02900637470355	5.92296904008852	5.7683789533169	5.89244874583855	5.85113045307899	5.73935661654954	5.69052660122565	5.96876014314622	5.86823420788551	5.80071417725483	5.59881643858083	5.85764761720187	0.13249162613395	5.85468113678523	1.91084030817504	0.0737299028151553	0.121118456898806	-6.4279140391713
ENSG00000014641	7.63079696258914	7.45825969000261	7.77791068407425	7.91889274699317	7.84617599689426	7.93382657619878	7.9219477087967	7.22865791510529	6.74123111242467	6.93937285160124	6.84977309875678	7.12483850935758	6.51389322594777	6.58844493747664	0.927561480141944	7.31957300115849	8.19686853708534	3.47389322420074e-07	5.53413016122346e-06	5.89785139939551
ENSG00000014824	5.56877389142881	5.62093272001895	5.75206607415035	5.66818203564964	5.72115659775113	5.62383563425573	5.70007644478569	5.73981032550574	5.58487708324779	5.73903071292723	5.63557671455609	5.7115432459788	5.42778911602101	5.6677767727275	0.0212048868713675	5.6543876692146	0.327909071951927	0.747144031944813	0.805517761785837	-8.09623378229522
ENSG00000014914	1.94099852509134	2.18667647752452	1.99421745763519	2.21324907053161	2.35289087526069	2.30885917744336	2.34103151049713	1.48481016411483	1.38053251671178	2.58139398502377	1.38951371114146	1.32433000290197	1.65890109110208	1.46820323059661	0.58380847166354	1.90182912825545	3.49458760598202	0.00291783636293876	0.00802916264375485	-2.80623112589697
ENSG00000014919	4.65653951920611	4.45692907443047	4.74792198206161	4.7922681764134	4.83338741168596	4.61892959124695	4.65906409160821	4.5170853268226	4.43328272905018	4.14921638019758	4.25344640907944	4.56735708670729	4.5314661652308	4.79686513613017	0.211454557044339	4.57241136284791	2.18177329742442	0.0440534477125883	0.0790118644429579	-5.80527464590328
ENSG00000015133	3.90316401028356	4.10932081910651	3.85087296715218	3.77601303122617	3.78928870994006	3.60670716941286	3.9120449750739	3.85230761657959	4.23716721607903	3.78336830429785	4.46768181049025	4.14144336655749	4.21748413292872	4.19692122421928	-0.276477605347142	3.98884181095339	-2.60457270824309	0.0189269741497081	0.0389319253635452	-5.07885555347866
ENSG00000015171	4.46137134502689	4.02699155903579	3.8600091088466	3.89139141770273	3.88065075444366	3.83176976956704	4.04494868813162	3.90609285641049	3.63644081790957	3.93774035324315	3.90984536331055	4.06255668039922	4.74298841310172	4.10277203924533	-0.0502353738673289	4.02111208331245	-0.340287856617147	0.737974614094586	0.798319174130762	-7.87741251134672
ENSG00000015413	2.84495280966118	3.76746226892126	2.13145600622726	4.24374244800944	1.94494072631735	3.0560179194926	2.09771318033968	2.47498590023136	2.17802209565315	1.94079021612639	3.24663383841758	1.87712551991699	1.99544641967728	2.89807843100659	0.522782726789632	2.62124055571415	1.46599801319316	0.16162594503012	0.233378737330833	-6.22295150552967
ENSG00000015475	5.44076068650753	5.42396708259938	5.4061689865503	5.36235971943937	5.38866866216622	5.2707670108992	5.17412687040428	4.50985544205367	4.89364371474784	4.02527811458148	4.68375553351445	4.48146680185698	4.48464642978674	4.25821707450928	0.872361165361839	4.91454872354405	7.90210356323348	5.63846634969268e-07	8.03580491125405e-06	5.70499386729508
ENSG00000015479	6.65902168162519	6.72155795819136	6.71135948681726	6.79740508139657	6.8099103162382	6.57224361594228	6.70770038545963	6.51494480555821	6.67327152596399	6.45687601016579	6.61796656355943	6.57814554036618	6.38963698215677	6.77675406579816	0.13909304475001	6.64191385851707	1.99678158929587	0.0627838788526511	0.106016970023044	-6.28066690701781
ENSG00000015532	4.50396799470221	4.62530107280695	4.50348992555254	4.83244669896602	4.57479077553291	4.96955701599389	4.77018392938675	4.72352521699443	4.66021356572135	5.08480837993692	4.55653639892497	4.55917325654698	4.14970614124308	4.53229382040439	0.0789516326397779	4.64614244233667	0.655740505241113	0.521116793287955	0.610561464296082	-7.83885381580367
ENSG00000015676	4.87275200617315	4.63217730272352	4.83200253030658	4.88181939821061	4.77992994251119	4.8396755118723	4.84261997323116	4.32306873166987	4.43429492588948	4.44892267327442	4.54460950162495	4.68126261065193	4.5543593339663	4.81981899777966	0.26899741842216	4.67766524570608	3.43574713239953	0.0033076106613656	0.00893010855356714	-3.4319649266049
ENSG00000016391	3.24598736186501	3.55987732776217	3.60138851239343	3.32745474096837	3.20479354845474	3.38763501365499	3.5353399660291	2.57149833004468	2.55500562058631	2.46699691367356	2.70474093867398	3.1206757551396	2.41224680558284	2.44181409562686	0.799584806987979	3.0096753521754	6.81857278836051	3.68857649925646e-06	3.47474183997294e-05	3.8458603419396
ENSG00000016402	0.720767201297287	0.763946938879836	1.4121865667255	0.220429054542011	0.938551822204798	0.580105222256421	0.998006242935785	1.12762991158464	0.590625542700734	0.255781663350533	0.157736660826979	0.655594366220436	-0.610476452661021	-0.277320719234867	0.520865848972171	0.538111715830648	2.05356158656899	0.0563803991006854	0.0971275070706925	-5.31938648455501
ENSG00000016864	3.8197508512223	4.25446522689495	4.00061815125233	4.59699640288517	4.39288158764984	4.34523547377728	4.45537596162686	4.69095683360904	4.784569653135	4.58305217273949	4.48944733925392	4.28274535299717	4.14667355626949	4.45106762483105	-0.223155363009671	4.37813115629599	-1.75531366239743	0.0979305552108683	0.153854755062796	-6.50599641646157
ENSG00000017260	5.70795725137527	5.46933466845739	5.21247471912323	5.19448584719156	5.39866717289432	5.12102416320304	5.27011878517834	4.97257242056406	4.97209088460502	4.91475666614536	5.02617416451845	5.34040220092667	5.39355728118689	5.36421598172269	0.19754151042105	5.23984515764945	1.84223478846167	0.0836607870029336	0.135008676559627	-6.53012376108707
ENSG00000017373	-0.578366085480833	-0.171856106169875	-0.185742822746864	-0.555969803948425	-0.450904112594485	-0.0313511175327985	0.566290900256715	-0.400455196553685	-0.929947118058301	-0.52633377524761	-0.676153361331031	-0.297192669226808	-1.25655918810707	-1.28576116187908	0.566899591079319	-0.484307258472868	2.46129806474607	0.0253188318732563	0.0497105182657529	-4.4020527674029
ENSG00000017483	5.91343391503029	5.85716299694741	5.95274193877413	6.05719514437506	5.95934849094574	5.85605594362115	5.88106980014232	5.11432909722624	4.9054785442276	4.73750116843131	5.33076721761789	4.64383075465164	5.52564998856569	5.51049895616863	0.815779732586584	5.51750456833751	6.43631441506929	7.4313830463503e-06	6.09894558712943e-05	2.86136640520407
ENSG00000017797	5.02057780882358	4.96218807015293	5.09833052049754	5.21965625061374	5.27659929985649	5.2785914798873	5.21698432252665	5.61095195280767	5.80387418004281	5.6621279219576	5.51535845694549	5.55167305814299	5.14052584944969	5.38079814012554	-0.369863259538464	5.33844552227357	-3.80651284965222	0.00150035267638769	0.00460201421983736	-2.59678592229275
ENSG00000018189	2.14635912440203	2.38471446825741	2.21707164665787	2.2565107069013	2.51031441983653	2.33867613931753	2.51118042398844	3.07225672626928	2.96239118879783	3.06553154648837	2.86378104124328	3.1353075868549	2.43733463851774	2.79972986618058	-0.56789127697672	2.62151139455094	-4.98228742949451	0.000127515919287618	0.0006032388979034	0.102186414925429
ENSG00000018236	1.01520197855682	0.686820879403697	1.42924259056782	0.370724391223868	0.60039772381037	0.587421116936648	0.62352150209954	1.31312386989547	1.38539715519389	-0.404882602005828	1.75628095785947	0.993594277850929	1.12559257412782	1.1921072843505	-0.295946728575878	0.905324549990786	-1.10627055454524	0.28462926869575	0.372457029275989	-6.87246952600684
ENSG00000018408	3.2472108655101	3.00366074759463	2.81822078543016	2.8371089124819	2.82042319358424	2.54341334174363	2.75984457584545	3.07123036687336	3.20782397958474	3.08612055556727	3.0482841123951	3.15616060981593	3.54160338343703	3.03676061513144	-0.309521730542596	3.01270471749964	-2.81739795168776	0.0122002767532721	0.0267886646877276	-4.52826279771958
ENSG00000018510	4.59002174500714	4.28739801382287	4.48472436583261	4.26858605244915	4.36448031139193	4.23717763754242	4.31464316521928	4.13044994611842	3.99316872592699	3.88607062858817	4.15871290145557	4.12724505705111	4.53785519997171	4.31856073199726	0.197563973905524	4.26422103445533	2.08182751928991	0.0534192892658822	0.0928676145772107	-6.10358454462747
ENSG00000018610	3.3712769903008	3.39566654371417	3.73267243680898	3.41906164823526	3.29119145039792	3.26481281445658	3.39454908931046	5.16811357609904	4.72072104941109	4.35245901712567	4.19286453103216	4.34816870534487	5.25598878908268	5.05663301275669	-1.33365799710188	4.06886997529117	-6.56577953133581	5.84878427455959e-06	4.99197429212236e-05	3.7634608770281
ENSG00000018625	4.83739822872506	4.84399482536596	4.52391848832501	4.48628848377818	5.06674667319559	4.43994193114737	4.6044093936293	4.09836699421697	3.67759005872064	4.25015964765697	4.87617498128037	5.30930921611618	4.02578835579349	4.45187001030953	0.303169135797698	4.53513980630433	1.51624925553831	0.148560396357042	0.217532312808176	-6.98923416137738
ENSG00000018699	4.77536081868648	4.86810318428225	4.90094809923382	5.01122992350217	5.10668752270167	4.93593971618446	5.02920075660385	4.51656366132315	4.21174253884222	4.28014142630542	4.66241796382847	4.63708956148049	4.98912691026073	5.05736483379708	0.322666738184343	4.78442263693088	2.65288596866689	0.0171426566038994	0.035812439671483	-4.94519357254217
ENSG00000018869	1.64051299595185	2.10171069619122	2.08070808932372	1.24377152322809	1.69635206630106	1.69603207454973	1.78578366706655	0.947253502890848	0.977451408300242	1.15315570755523	0.670486049908793	0.966707462231239	1.70293942135788	1.09788535401024	0.671612291164914	1.41148214420476	3.82408375766832	0.00144521622623498	0.00446779951473353	-1.87727838112535
ENSG00000019144	3.82572721780301	4.07189689657449	4.01203750552802	4.02361288110917	4.14082606974236	4.29805979718062	4.10561565207773	3.58549214927259	3.89808537285485	3.8188221035997	3.74193185615669	3.52355793400711	3.60892126185699	3.42769677438212	0.411820919573676	3.86302024801039	4.74132214619008	0.000209374823910896	0.000906223677745204	-0.659104090985973
ENSG00000019485	0.884647969605679	0.678674113342294	0.480195580406262	0.724355858009959	0.331455287862044	0.516390022150647	1.10383306921841	0.0304025859810091	-0.262581859196201	-0.0484494779473956	0.576548331814727	0.483209851955308	1.00327308597819	0.418357457789039	0.356074017088209	0.494307991212141	1.75447272535305	0.098078433439344	0.154047311058234	-5.77217358412458
ENSG00000019505	2.89780142221957	2.95320080381588	2.86229945961596	2.74573604159811	2.89399314207256	2.57548351060221	2.31640031349631	2.50541922982104	2.44560676258075	2.24237306380844	3.06160065316326	2.90794281132576	1.40417862706691	2.46952183585357	0.327004087645485	2.59153983407431	1.57366583907489	0.13472360456862	0.201111751650134	-6.35489452202472
ENSG00000019582	3.96631707148933	4.4761113362925	4.72615755734915	4.89127257803795	4.19966693059945	4.94370897055784	5.15945290893511	5.42757166534169	5.28139284305299	5.66975905203626	5.20836002577393	5.0848189302346	4.55107029444657	4.357097860846	-0.455232376461545	4.85305414464238	-2.12419225994557	0.0492464003783065	0.0868663679716476	-5.89041913379006
ENSG00000019995	3.94493111886641	3.72516058876428	3.94958386724906	3.77866065480916	3.71756837225461	3.83485189001716	4.03096318590975	4.09065624402096	4.12229767746393	3.92817334818801	4.12853980439107	4.10758891527813	4.01806443120016	4.01043601914188	-0.203538052115174	3.95624829411104	-2.89415667788743	0.0103958576535887	0.0234054178969311	-4.49252684293693
ENSG00000020129	5.09589733512813	4.6514929273124	4.70229908037004	4.54519374068918	4.75002200372016	4.46250355611214	4.69764715374016	3.89407567340779	3.70780344574386	3.39609678469516	4.43617983784947	3.97538315267253	5.11023552919415	4.65788149441035	0.52780968794298	4.43447940821754	2.54487015108706	0.0213775200727528	0.0431915333342421	-5.10280031562277
ENSG00000020181	2.96670432764058	2.23376673931662	3.02929161316464	2.11539176729206	2.62158141151271	2.93442833318737	2.5846914141138	-1.74209342700772	-0.311685253674792	-0.409604756116982	-1.13649353014024	-0.801387765901163	-1.19124351038304	-0.403685180674906	3.52241192861413	0.89211872730921	14.3970379321916	1.04556759563406e-10	1.27134353670036e-08	14.8614125170652
ENSG00000020256	3.51189461913173	3.60140825846393	3.40803276252966	3.75722509316428	3.83956393826167	3.60181967689498	3.44597268512399	3.26264505584194	3.08089652058608	3.11636447303965	3.68620194267096	3.51803447017388	3.00537577545264	3.17853926784234	0.332448499810468	3.42956960994127	3.00441971940634	0.00825017380307474	0.0193253934218762	-4.1735900624474
ENSG00000020426	4.22717393716919	3.89449867966988	4.32916420586718	4.29482495653799	4.01130777223068	4.14779628695936	4.13063197715664	4.28675781772538	4.18739362265657	4.12435154397575	3.91867056415391	3.8557820782217	3.86272512793815	4.09108345711543	0.100218851620144	4.09729728766985	1.05431044512297	0.30707991747542	0.396590585270939	-7.41541558309508
ENSG00000020577	0.642386525215465	0.0934900676104746	0.640787015896251	0.583399435551578	0.68522856150727	0.687067311386384	1.04420229767798	0.841473914512938	0.808423369702176	1.58042147750135	0.945757108701196	1.33398657297408	2.66901872600731	0.729407553032756	-0.666756155759246	0.948932138376944	-2.44252947588864	0.0262940061411161	0.0512958330961443	-4.94174132302154
ENSG00000020922	3.8160589832467	3.77775185322227	4.02724018078721	4.2332248384831	3.9547631421491	4.11175689434589	4.12474934516547	4.25583758378422	4.53357517959709	4.24964041888578	3.87079405859775	3.93203827319697	4.08820332924426	4.1409705876969	-0.148594278850083	4.07975747631448	-1.33028410131533	0.201691953280139	0.280451589554733	-6.97736962323094
ENSG00000021300	0.0184654460377542	0.452942482976375	0.044894818576755	-0.577405270860143	-0.129580467500776	0.506918440131505	-0.429132094379167	0.635089980415643	0.125365534560971	1.46319110917914	0.983882449149033	0.36476687952219	0.160744722652847	0.39692540533676	-0.579824444203559	0.286933531128492	-2.44971855717031	0.0259163586449016	0.050703745550088	-4.62220527705822
ENSG00000021355	1.09989722237947	2.34166322442877	2.19475743190791	2.31522612951658	2.09776356349937	2.32650417994537	1.87717795853198	4.22175351955205	4.07619271657375	3.48883649322811	3.72366100585734	4.19584741902479	2.49392199189865	3.27502144197422	-1.60101856223337	2.83773030702274	-5.46362689409374	4.82944051457966e-05	0.000272377759513202	1.45890834423001
ENSG00000021574	3.99903432887367	3.53654645185674	3.72933845568361	3.32622500661413	3.54785656987314	3.49107592196122	3.68225878746464	4.00536714427322	3.54171419385038	3.77751598309464	3.84401527122917	3.83977390579502	4.0506423731885	4.25949714482272	-0.287694942407743	3.75934725275577	-2.48708189631682	0.0240347992838106	0.0476119046359472	-5.2401884200464
ENSG00000021645	-1.0472288256199	-2.01288511576533	-1.36213088631747	-1.40640567356634	-0.405780207446538	-1.36560870915524	-0.928664703234939	-1.0872361899337	-1.33403015546934	-1.19313800775169	-1.44406167362232	-1.44622172271062	-1.44703329437352	-2.12391709954811	0.198676562265064	-1.32888159032251	0.884639809740235	0.389181459352719	0.481032552227272	-6.90227644824176
ENSG00000021762	-0.992865696838608	0.432820605483671	0.248949812476714	-0.442497992254985	0.39244643259466	0.236980878544168	0.119033269076803	1.75708807459893	2.2245181763351	2.69302826678585	1.6684488962243	1.81550687120349	1.4806400553508	1.97271879037434	-1.92970594985836	0.971915459996803	-8.03495324090976	4.5265260334213e-07	6.79313789799885e-06	6.32178473617557
ENSG00000021776	5.28262964091692	5.33671275251415	5.22389263878731	5.24929391326359	5.42184862046829	5.27242282293948	5.28900300262828	5.19691272116892	5.17721955427738	4.9113459787493	5.23714315811791	5.39633311590492	5.14116480420677	5.43829284046681	0.0822787700077363	5.25530111174357	1.06223963449251	0.303573096121024	0.392796927796043	-7.58539300086268
ENSG00000021826	2.37092149827904	2.34193730645857	2.1256431295063	2.07631374664342	1.94647161863197	1.93256627897358	2.45081955094756	2.40948030076881	2.21544719764116	2.415211492722	1.72143115223398	2.81564071403282	2.70243601637384	2.08620436584378	-0.173543729786215	2.25789459778978	-1.1463248834872	0.268169098133974	0.354885951221985	-7.28461059839594
ENSG00000022267	3.30517821456967	2.95813644813067	3.45952437890515	3.21202074578574	3.48663584405568	3.65723465713736	3.26850675481428	2.98191517799568	2.62145037639365	3.47214341132908	2.93519995057426	3.02481995776089	2.13635212504602	1.73888869155828	0.635039954528928	3.0184290524326	3.01374035257568	0.00809002764036219	0.0190112831010106	-3.86622025027009
ENSG00000022277	4.33753484792397	4.50008072556512	4.52578818581084	4.36790167059806	4.47835227777998	4.34401853218374	4.48162983724152	4.68616927411765	4.7331578310585	4.78295462689466	4.57326068073072	4.74212955554288	4.6547000401347	4.86301785991921	-0.285727549246253	4.57647828182154	-4.05442133687878	0.000885443423831405	0.00297453268326029	-1.96216127781741
ENSG00000022556	-1.2027343532479	-1.40727050754683	-0.607695847225243	0.156155348007899	-0.44426082924048	1.05134868222573	-0.36857550627059	6.78528783919699	7.81161361163129	7.5539595199561	6.46646919995473	6.30866190079091	6.49351571006573	-1.26355109639028	-6.19567754037454	2.66663740513629	-2.75595653987026	0.0138596129599348	0.0298928494303324	-3.75105638058295
ENSG00000022567	3.94774591075375	3.60912396850374	3.50004374930353	2.90514863181493	3.14465030392328	3.13761002534133	3.2367788467997	2.70132284397882	2.62516595186083	2.43859340387983	2.82432817168955	2.90949958050231	3.16171035702975	3.67075834305035	0.454916550161974	3.12946286345941	2.38595916943809	0.0294519952696965	0.0562908659590886	-5.04938765696469
ENSG00000022840	6.35315856545807	6.45340884914481	6.36626240882624	6.52762957170453	6.4072431721314	6.51045897562613	6.367549490627	6.27358015001813	6.28654799236685	6.39831284446824	6.27154885457668	6.20098101229925	6.09986952944302	6.21712431916742	0.177527336786798	6.33811969541841	2.9457791219743	0.00933107171910846	0.0214239716833181	-4.51253552712608
ENSG00000022976	3.87389349762438	3.77125671797007	3.7472712428646	3.906393449219	3.64284123851448	3.83174980232566	3.68620605616742	3.27230123003685	3.53829706879955	3.7375029937501	3.52949534123466	3.3868374484074	2.7678202927117	3.43459594079708	0.41378290326613	3.58046159431593	3.32001639809083	0.00423135589225309	0.0109761377058265	-3.34327992562007
ENSG00000023041	5.42603607306348	5.14310121838012	5.08904343433931	5.0005130047938	5.11822527865902	5.2734587298682	5.07492601936494	4.66927289950819	4.72664442959764	4.83342903191374	4.61719935845959	4.21172159194561	4.70646516898952	4.4160122893364	0.565419107757188	4.8790034663014	5.65655631827856	3.2988084854148e-05	0.000200248369456277	1.36902854963993
ENSG00000023171	2.15139933175039	1.60207559288058	1.63844571219766	1.62113900674375	1.8560520838401	1.70503007894926	1.6490189604241	1.47557539886773	1.30011722871784	1.37427792173886	1.74342047248894	1.42781021158514	1.47328625699073	1.31056634191597	0.301483624965977	1.59487247136365	2.81283348681984	0.0123166369866507	0.0270008289038536	-4.36692126944749
ENSG00000023191	4.79727720150178	4.96508799807308	4.85803956618757	5.20697440651309	5.10798366036433	4.9604888517011	4.78734429545719	4.77199825713531	4.79165336949615	5.35917687526483	4.60412224337772	4.61841399834728	4.6253598729592	4.82618253569368	0.157593524142678	4.87715022371945	1.36462214335753	0.190868584910731	0.268344870850006	-6.99647326093633
ENSG00000023228	6.14392927804905	6.55963393510998	6.57532738028575	6.40437560955134	6.37446879596241	6.19783344831309	6.38943292178924	5.90195187622189	5.66681562919106	5.34050951628106	5.97341968625372	5.957431491369	5.95017412210899	5.9466141202869	0.557055428765469	6.09870841505525	5.32041765706303	6.42824040554612e-05	0.000344661295048026	0.542633696770135
ENSG00000023287	4.8467122642576	4.4561661648516	4.46323315580726	4.37336449163012	4.44600889128977	4.28110212648407	4.48105194282172	4.85927871499245	4.97292182361155	4.99080926728554	4.68107641231813	4.80177304980181	4.78493233115238	4.87341118742903	-0.37443029598693	4.66513155883807	-4.50275979805974	0.00034402029489185	0.00135460077940107	-1.16428607610538
ENSG00000023318	3.7858976293034	3.54353800064946	3.87818935889727	4.05235820081186	3.77896784988221	4.10827777796248	3.9410162581407	4.43940782862668	4.64679687245376	4.75675168755493	3.95406243154515	4.05607866389922	4.41153720957732	4.25584216839532	-0.490850542708776	4.1149087098357	-3.86621584518213	0.00132116209539839	0.00413896109732143	-2.42589109261768
ENSG00000023330	5.30289643369695	5.23508745546363	5.57857447462483	5.71610265903306	5.46179142051527	5.50971974165145	5.69102401371645	5.0649409530265	5.14835890268507	5.07185923506883	5.3069508663251	5.12844040514662	5.76361596893164	5.50868156505873	0.213433530089666	5.39200314963887	1.82807684845663	0.0858520182019077	0.137832068795069	-6.48139051167244
ENSG00000023572	4.030751444209	4.05716811929583	3.92903044720626	4.13252003768887	4.04405107063662	3.61241841684996	3.91841683777503	3.96885645020567	4.03932011728451	4.0131679871205	3.53512816564413	3.57226931281114	4.16667950028613	4.38489191058421	-0.000105016784828216	3.95747641554271	-0.000703778368697964	0.999446985813645	0.999559838318308	-7.479364873313
ENSG00000023608	3.99983224555563	3.29197111181743	3.60808950690275	3.7148477948981	4.08081701558035	3.59973858686955	4.03404772968099	3.94895085669935	4.14356119023662	3.94072087766506	3.91183902605388	4.12632439525287	3.34958876178252	3.52211742829427	-0.0948473325766099	3.80517475194924	-0.585729954711274	0.566058970836692	0.651058753926798	-7.40474626834915
ENSG00000023697	5.42344621939415	5.2817487743364	5.53231590427011	5.54814172693033	5.46317221210897	5.42349617326487	5.57895045419016	3.85147983801664	3.66392863106133	3.63503650802532	3.49246957711973	4.30020540536808	2.85519285019863	3.19331820909147	1.88852186037352	4.51735017738401	12.2345331107102	1.20620802535779e-09	7.26770191912358e-08	12.0906092826697
ENSG00000023734	8.19869787167226	8.08148405257744	8.05813908152469	7.95112288437495	7.98428002514046	7.70610630755675	7.93938341178409	8.0413970191056	8.04794701918567	7.7744201840571	8.2485307503232	8.02029906208897	8.14503093296446	8.15609515407847	-0.0742945113544708	8.02520955403101	-0.864299872901943	0.399932104878577	0.491475529935093	-7.74492776644313
ENSG00000023892	2.02486635441935	2.46823481792691	2.07381242649872	2.54323246526882	2.04084431098102	2.67948352986547	2.51071028359736	2.91495919379256	3.14725659906527	3.34049702893803	2.92926932502076	2.8603592175843	1.70254209545098	2.49374926543204	-0.415796298926824	2.55212977956011	-1.87793890239213	0.078353330941354	0.127696624382327	-5.95034353606328
ENSG00000023902	3.44654663245475	3.84132605168383	3.81205930141047	3.7090565452969	3.9974022264468	3.79425017873647	3.79191959183458	3.26251475558647	3.41950734758753	3.31617272411802	3.44195790952277	3.36573737134256	3.57476856733003	2.8387792322848	0.448820238804548	3.543714173974	4.16255183836026	0.000704082473524752	0.00246530143419728	-1.74473398288529
ENSG00000023909	2.70031176162805	2.27870357015811	2.53079723062268	2.23194656110786	2.39525806304557	2.03940858201994	2.33946090255302	2.69134707053964	2.71787815737129	2.80705791052373	2.73785515516826	3.19705184634553	4.01264952210416	3.31933845699655	-0.722065446428393	2.7142189135846	-3.68449495598281	0.0019461444690853	0.00574358010020302	-2.63511724215466
ENSG00000024048	3.59252866866204	3.12073875202818	2.92457577984123	2.80214575720934	2.95971518571413	2.965886944302	2.93455098399354	3.42942878229648	3.35501506422115	3.56594949888547	3.42022533169311	3.50517542945979	3.54179088609072	3.52108229265028	-0.433265405869189	3.25991495407482	-4.2516146478584	0.000583253526995821	0.00210147385348317	-1.57914642748261
ENSG00000024422	3.48053821319785	3.18055601189631	3.10971775807853	3.68242242504713	2.99265495761792	3.64956508558285	3.55584562303118	2.85413378576446	3.04637463774084	3.85077568921433	2.68339259345337	3.02290736503415	3.16260294474482	2.51992767100654	0.361234534289671	3.19938676867216	2.00609066494364	0.0616908417933409	0.104486395138708	-5.75787252703385
ENSG00000024526	4.3280006174022	4.64001457108646	4.41551156627715	4.26982548909809	3.97000091962231	3.84439884485718	4.38596832706022	3.44175973732044	3.71802458152922	3.26053191892612	3.76303905830017	4.18735547867779	4.0815974211409	4.12358755245024	0.46560714865883	4.03068686312489	2.76530439806905	0.013593802276566	0.0293976843475631	-4.2937908133404
ENSG00000024862	3.97207381892439	4.41842322085298	4.52130866893095	4.55085186182985	4.31291737126511	4.20813981624711	4.2308190327766	4.25125172357479	4.14457502299675	4.21616038233604	4.01040832354378	3.92362603765993	3.95826739866686	3.57152448615436	0.298916883549899	4.16359622612568	2.42096609077184	0.0274581357194564	0.0530397270883983	-5.08916949115346
ENSG00000025039	2.42557048502244	1.12911425057376	2.23062763657452	2.16450188714175	2.63922792093278	2.4954487692253	2.19738072017582	3.24374653074719	3.29000099116514	3.3651356494858	2.97583064565817	3.44651613387799	2.19588359995493	2.33367909858891	-0.801863779504369	2.58090459422318	-3.24292006060718	0.0049841746363192	0.0125855579872699	-3.47259723863041
ENSG00000025156	3.24001903795778	3.52040653028719	3.68269931904855	3.57404434802352	3.73113708735059	3.693667474234	3.42777160140936	4.05691267912914	4.06473790071538	3.74704382551869	3.79052572581878	3.70972396784077	3.29260273207072	3.60020372425905	-0.198038133669877	3.65224971097596	-1.51440543369084	0.149023750046698	0.218096694006792	-6.58837464600607
ENSG00000025293	4.5607474536444	4.17913000920464	4.28587986921882	4.27926299799006	4.22447958299832	4.16701413221019	4.39609769593637	4.34795828326374	4.47325755535342	4.46436670182517	4.5078200628182	4.72124282702844	4.25389928050144	4.6607258839189	-0.190175088658466	4.39442016685087	-2.20569779422494	0.0420481536410586	0.0760654099235024	-5.87257160161239
ENSG00000025434	2.57166300147893	2.39399049765246	2.07930889792841	2.21326608313504	2.29723772351269	2.51056205857894	2.2580591750392	2.95637772708155	2.9357620962605	3.0609512180716	2.84616612592052	3.00597684231807	2.96450525834285	3.21089797193111	-0.66021372945025	2.66462319123228	-6.63014001954238	5.19676684311626e-06	4.58159190576145e-05	3.54383202329755
ENSG00000025770	5.77901358463979	6.00684913644252	6.12575693703794	6.08673989020103	6.12220085700665	6.18845461656912	6.00755354117668	5.79510216839149	5.74940521971306	5.83342612875691	5.65665396086812	5.60982897605038	5.85561957868373	5.73089052209497	0.297496690232742	5.89624965125946	4.02468043371813	0.000943154959850312	0.00313552008094459	-2.14214668189769
ENSG00000025772	6.13504407078461	6.29386058187145	6.1383161012081	6.36985172319407	6.39884895668754	6.32524824186014	6.0816507628192	5.90243164591494	6.13201479852955	6.11379785051213	5.6791958907599	5.76246077784945	5.54498814029133	5.7453811279711	0.409626737613776	6.04450647644668	4.24109106448555	0.000596358634013094	0.00214045441892462	-1.69109081881588
ENSG00000025796	4.6130663077403	4.63267553220836	4.67376961861172	4.64816579837874	4.79737561250255	4.71577017421721	4.76649957152442	5.13860810809496	5.09603904110155	5.06649656497808	5.18156397304739	5.0614979264859	5.08544643813944	5.03601734408877	-0.402888069324602	4.89378514365139	-7.1744042748785	1.95640214571648e-06	2.11468654667099e-05	4.15480085622295
ENSG00000025800	5.08561940459591	4.45575752598599	4.16888667331528	3.86881564859325	4.06831032723924	3.52492970854331	4.13288754322653	3.58671479541772	3.40001663206204	3.02359369315562	4.28487951080162	4.35077706434141	4.69149193319596	4.7552455603974	0.168154405704434	4.09985185863366	0.608354015403824	0.551315228661835	0.638445066417049	-7.72202851509586
ENSG00000026025	4.75935387925598	4.01180966054888	4.77026376918949	4.83755807968763	5.92725757854148	4.31809023557256	5.14970095734816	4.25369200553362	5.41935372464754	5.95923028532833	5.60001480637546	5.09408126305286	7.73608745514776	3.61499325483736	-0.574259646613069	5.10367763964765	-1.19145773522811	0.250490928011837	0.335282644323333	-7.4004481040697
ENSG00000026036	0.984505736333235	0.908917548118391	0.747754564353192	0.52573568046926	0.587832289374036	0.247159332031017	0.267877473805495	0.328039858724292	-0.501477196361119	-0.170842385225408	0.635144945503041	0.657986924740843	1.50964823975665	1.40162027213732	0.0512036415363286	0.580707377411446	0.180767363955837	0.858772994476049	0.8947539931623	-7.30288536694265
ENSG00000026103	-0.235063863795441	-0.767918056293491	-0.086496548200337	0.399597208517699	0.491043847172425	0.268253166921284	-0.0965320726251682	1.73576753988188	1.31437264957294	2.02281127580415	-0.210847383850696	-0.0312819515965355	1.09587289845015	0.385657713739907	-0.929443142922645	0.448945458835626	-2.59398888581411	0.0193409001199179	0.0396693790629458	-4.2321173977779
ENSG00000026297	0.0620716351530353	1.28706266140672	1.88311929175407	1.89421202983662	0.686275077718018	1.52732022766648	1.28095001257458	2.21607475564089	2.77375217383321	2.91403453373203	1.49833939672855	2.46184982087473	0.773488012187207	1.29434607898621	-0.749294517534697	1.6109211220066	-2.07525382249111	0.0540950007492756	0.0938145132686568	-5.4502573023072
ENSG00000026508	1.16577818704561	0.151257712414073	1.00905303227168	1.63008707055112	1.31108148492375	0.176241964228286	1.04330415120291	0.979940646057369	1.49194792962615	2.06504396968207	1.2013434466083	1.09965209641343	2.03346505875082	-0.0480051743479395	-0.365671661827503	1.09358511253054	-1.1782500407788	0.255569878981518	0.340657211377073	-6.87173465982544
ENSG00000026652	3.96116676815369	4.49690637240705	4.04987563688954	4.34143312511093	4.80451746106171	4.07648792037211	4.14776549035517	4.41984563805321	4.48666429417805	4.36215914702407	4.17135974905939	4.28172995106812	3.78776696993623	3.65385492727343	0.0923375805129432	4.21725238935305	0.589893841396139	0.563329938747749	0.648778263105493	-7.66382698827919
ENSG00000026950	0.668844881872818	1.6603722371672	1.23897363325755	1.07482087026805	1.46694571341495	0.913090443564703	1.41316540175756	2.41837137398524	2.65666420187246	2.43572514401919	2.30255063435047	2.49573100883459	0.8833055717243	1.94168763518767	-0.951174913536047	1.68358919651977	-3.51449323751073	0.0027966113808209	0.00776227072200028	-2.45908717770817
ENSG00000027001	3.73785576994844	3.92579773758241	4.03618219041315	4.21749517390498	3.94278664736277	4.03436795243383	4.16475768532509	3.71930083474284	4.02073373683904	3.80055496789026	4.02679612348987	4.09461096005047	3.78313800711642	4.02526976399549	0.0885603554143408	3.96640339650679	0.89451854211193	0.384030072108779	0.475922004646772	-7.41169814170738
ENSG00000027075	0.0973888546779254	-0.901157636295843	-0.757216215876606	-1.29375093168004	-1.00239414866908	-0.768358902679693	0.900009898828691	0.763630023592116	0.862825676478829	0.884514236217454	0.224466024906366	0.523776590569617	0.110545922969022	-0.752364780133525	-0.917603886322062	-0.0791489562210547	-2.85768331402479	0.0112184083652248	0.0249386754727216	-3.91974860341111
ENSG00000027697	5.07370906192877	5.24041457105001	5.43030556294749	5.49649202877133	5.42545034102968	5.1419574491277	5.57754492844838	4.81599586923116	4.69632635763471	4.82318356361562	4.7023824799859	4.41007027257008	4.92806416212079	4.47501370964013	0.641836950212899	5.01692216843584	6.14233623071536	1.2909959342033e-05	9.47690682460093e-05	2.34520791794788
ENSG00000027847	4.64071315498452	4.56443922517829	4.77018054013658	4.70994248655813	4.53400897591657	4.81793181031213	4.67271863560429	4.47481697642828	4.20494262988847	4.57000253446623	4.21754435113998	3.88591762923311	4.3418453047579	4.51345304532395	0.36207056062818	4.49417552142346	3.3869773412399	0.00366957982314456	0.00972402700359077	-3.23476670726987
ENSG00000027869	1.64131244493057	1.90565866087353	2.11269346147878	2.27618334619037	2.20525595391448	2.67540500293595	2.25332070791932	2.22023265263456	2.38688939098459	2.25482094448071	1.5423027496589	1.81731482841815	1.15142094395101	1.38711150954451	0.333248323699928	1.98785161413682	1.59231306684125	0.130470590299509	0.195778270809435	-6.28174773262752
ENSG00000028116	4.31104803290934	4.06046365874551	4.16826500008661	3.99778140819544	4.12142165904729	4.0121535176714	4.07011340596036	3.56875490113079	3.61548720583092	3.36242934323517	3.70460880175255	3.70999410426907	3.86239413868495	3.82566473121966	0.439592871655825	3.88504142205279	4.85408855097429	0.000165886995805562	0.000749492077701433	-0.168250150333788
ENSG00000028137	1.50390843439609	1.18717240698438	1.28020867214259	2.43787780965191	1.81222711754823	1.41909062203338	2.07161313059811	0.702395014314196	0.671127211838047	1.01289760847569	0.677942708419004	-0.554105678927516	0.371739617198487	-0.661626700596908	1.34320834006336	0.995176283862549	4.62329644061048	0.000267507123522514	0.00111044652127985	0.0747679007258713
ENSG00000028203	3.73036474172317	3.93453426385986	3.98501523450567	3.88522122234996	3.94846409123647	3.780106910822	4.05651324922839	4.18491088377203	3.95974482878672	4.0121315282876	3.92727615628648	4.12229066068638	4.21290354179693	4.25543329888538	-0.196660024035062	3.99963647230193	-2.54914808073345	0.0211923282272393	0.0428671807966977	-5.18364624380163
ENSG00000028277	0.521762136731761	0.359545615469233	0.399387496950053	0.963320674105939	0.685024920556772	1.34390086879299	0.769119875492481	1.08600576616228	0.796650969384006	1.82183042689184	1.31509435847452	0.772090265330224	0.932556691723523	0.851371993575366	-0.347672152668453	0.901261575688642	-1.81895234409862	0.0872909474183899	0.13975508037743	-5.93274517750495
ENSG00000028310	3.11493705097789	2.74371551716968	3.0805101742484	2.88439834987512	2.72767924036337	2.91308410119968	2.94510452023294	3.67968562232563	3.43715724098075	3.14065495162815	3.85625220927013	3.49675352934681	3.91705557181655	3.38692371454978	-0.649166562514045	3.23742227099892	-4.80301257815162	0.000184306251157821	0.000814243478821875	-0.00942261364115637
ENSG00000028528	5.98264320461396	5.99501018471537	5.92132503893183	5.95103291131997	5.78785683074829	5.76907215232401	5.92895632233584	5.64436707695232	5.55534437986252	5.6301878605491	5.69809352663824	5.50297333835065	5.78560178472236	5.57029067017617	0.277469239024886	5.76591109158862	3.9859456336219	0.00102405605803568	0.00336404488052691	-2.16804730950039
ENSG00000028839	4.77824511854993	4.50587605088993	4.89342014325369	4.28393298833287	4.62405931173153	4.45656523080799	4.53075784620826	4.54451334127676	4.56865676627397	4.41126056389736	4.44612638793482	4.17063781242675	4.60297728299171	4.48858970771229	0.117866991052813	4.52182989659199	1.08927954102938	0.291833441217947	0.380126799343283	-7.18296109367055
ENSG00000029153	2.59483746072253	2.36439145718523	2.40249159232345	1.61546447645515	2.22245465832304	1.76677948317826	2.35141711611252	2.70495514342942	2.76537769142311	2.19686981519245	3.0222452691688	2.93230093675643	3.57087215707235	3.0442480734377	-0.712597049385926	2.53962180934146	-3.54872640889438	0.00259975432205839	0.00731428799208801	-2.69017480529887
ENSG00000029363	5.5813836171352	5.90554359816693	5.77405460177253	5.29921234164853	5.65746470195137	5.30262055740707	5.68393641915772	5.70361127824941	5.81034483345519	5.66091821561344	5.62072732806332	5.14097013394827	5.79220575017536	5.86371825325075	-0.0552638683049231	5.62833654499965	-0.466112525141621	0.647287453955106	0.72269843152808	-8.06308772533086
ENSG00000029364	3.78053480519813	3.94166597063521	3.85360352996145	3.80366856952259	3.83382960665305	3.57727138034662	3.76259002584027	3.63868826165329	3.87547245872167	3.49417708650767	3.82165964345866	3.83772881197719	3.90766526231989	3.83516216333024	0.0185345784825981	3.78312268400899	0.227575404406648	0.822799113590525	0.866921141721955	-8.0369072185714
ENSG00000029534	0.0495517008335455	1.11883555048517	0.194602287827193	0.865318059814818	-0.137877520387325	0.841186650962294	0.465888785105324	2.32314768768899	3.02028581497605	3.74731406170814	2.23238678857208	2.60833832999887	2.88774626023472	2.09513045535131	-2.20441039814861	1.59370392236937	-7.86497524916209	5.99788096216986e-07	8.43933054226235e-06	5.81647805918325
ENSG00000029639	4.33696394813547	4.37345126604336	4.77626561853936	4.92043021026691	4.62299776805568	4.69432053489736	4.81871756649018	5.02012401017761	5.2378518124119	4.8678020987957	4.93272096219789	4.65275226354904	3.82707443375645	4.53758607774008	-0.0712104993391316	4.68707561221836	-0.39687507065188	0.696594493081329	0.764150660233696	-7.85373641052128
ENSG00000029725	5.40772505350254	5.08268520341758	4.92530149997313	4.92377506898351	5.03943406051796	4.76220603894019	4.95706266762881	5.17453544423967	4.85483881385334	4.81026636715736	5.24103114694656	5.3472733974294	5.0601206320779	5.46252652649857	-0.123156956625762	5.07491299436904	-1.06925206204313	0.300496059311277	0.389617293904076	-7.49236622364001
ENSG00000029993	7.27314087806734	7.64475255873469	7.56038142909079	7.46564671130304	7.4653213372734	7.4171307929987	7.4629500298996	7.17699259589633	7.23070870375089	7.26994214101313	7.34064308047566	7.25355813516709	6.86538667018881	7.19451986987372	0.280830543820353	7.33007678098094	3.61847489636759	0.00224041975346658	0.00645858569858875	-3.11851542842098
ENSG00000030066	6.17741488847953	5.86353060765836	5.80700877235967	5.60309374237944	5.80396535970467	5.20914877062608	5.7992810182469	4.73635715913604	4.56395974937544	3.98389807227763	5.59192094770675	5.39465846355247	5.6929694793249	5.83552842269227	0.636767277247538	5.4330525323943	2.5838967954304	0.0197436311781722	0.040366157411311	-5.21035451892947
ENSG00000030419	-0.34276300977849	-0.822120488843481	-0.980306411926994	-1.17598099177182	-0.494949942422089	-0.881451852305902	-0.723390627969837	-0.24263892866791	-0.373834193986541	-0.998721743845936	-0.409108525235701	-0.353377824277768	-1.22622622234413	-0.81041195357277	-0.148498862179039	-0.702520194067812	-0.802497682936652	0.433781255556552	0.525122109799129	-7.11383182634525
ENSG00000030582	6.15543737615287	6.33154326286852	6.23724709921612	6.47455344662418	6.1666151069523	6.55420223855573	6.40846836249029	6.76731741366197	6.84424964382012	7.27014091225899	6.67460666416053	6.3598791636207	6.71583704651149	6.47030172490027	-0.394196677605701	6.53074281869958	-3.31377102151632	0.00428790533273742	0.0111038501712228	-3.68624772125574
ENSG00000031003	2.76269693402846	3.14143597342031	2.27754451102688	2.40011258556547	2.62526251731423	2.37837243543207	2.75807920058939	1.91856954497802	2.08452131816346	1.90260823300532	2.23897664033921	2.18212032542191	3.33495193474173	2.60019602027793	0.291224235765338	2.47181772673603	1.4129626635704	0.17642966809002	0.251119809416868	-6.74102828899789
ENSG00000031081	0.694347951565738	0.327990137593516	-0.0780277458990213	0.378830547611	0.413162180335001	0.20781390362407	-0.460281450617523	0.816739956166438	0.600367192387985	0.419538862581967	0.75725775181655	0.45597926654632	0.558000383942587	1.17453949951161	-0.468573242361458	0.447589888369017	-2.77037902094548	0.0134515693782306	0.0291470626495363	-4.25329510799282
ENSG00000031691	4.36192165441472	4.14247368956978	4.53514782539864	4.70622762641785	4.5609638555617	4.26017392160403	4.25183769520937	4.78402020038576	4.68177964348526	3.99845148223587	4.7410756586427	3.96340487618608	4.43877753590591	3.90773166173242	0.031014389228452	4.38099909476786	0.161743815755491	0.873490458310538	0.906556106052059	-7.19070374222524
ENSG00000031698	6.66855278498206	6.66835788045542	6.72477711564948	6.77171257932152	6.91184784382388	6.75859757418878	6.65546507387254	6.86770748573591	7.01201688754047	7.03386631285464	6.89401345823361	6.93677965507115	7.23667140390406	6.9575331572352	-0.254976354152371	6.86413565806205	-3.66425990428691	0.00203197447453091	0.0059564454069161	-2.97117052863029
ENSG00000031823	5.65703368821417	5.82478663922137	5.87211502858742	5.87560532929518	5.69107923503704	5.91488617771458	5.84969268607755	5.71077063106161	5.8117267516808	5.75260138557934	5.62359870997896	5.48395289522796	5.61276800213188	5.61575828417907	0.154278900370183	5.73545538885621	2.24688851150935	0.0387923145348156	0.070924028872351	-5.81771744104815
ENSG00000032219	1.94826450359502	2.08751350863696	1.73075079957682	1.74911113093554	1.91420048013304	1.88837383072695	1.8725122715021	1.87629522768448	2.09314651942146	2.04920560897452	2.43743171067984	1.86153159361207	2.13070562454354	2.28251581875621	-0.209040944726545	1.99439704491276	-1.98970340228579	0.0636266529371572	0.107109265961015	-5.92954413495853
ENSG00000032389	4.47577973139685	4.77058102530575	4.71490932108038	4.9746208450631	4.72518932029121	4.85881266887613	4.7165390995442	4.50283165839591	4.33891697968904	4.62858321190828	4.27000474786561	4.4082702748824	4.3004598446145	4.42611675034497	0.337840196583239	4.57940110566131	3.78033303099278	0.00158644857138546	0.00482595990060797	-2.47963105812162
ENSG00000032444	4.50195038928197	4.84737725253853	5.00584399569974	4.68125001241983	4.94407278659484	5.12454325683167	4.9124151692792	5.2216261915021	5.20826690872922	5.3412983544546	5.006865548007	4.68737360960102	5.24253486278443	5.12150869540348	-0.256819589982884	4.98906621665197	-2.31705914528797	0.0337796245665237	0.0632024305302321	-5.64520789375279
ENSG00000032742	2.13973883042323	2.41931412912645	2.65778540927594	1.66525643155433	2.26759340071125	2.36868873375202	2.77907156136691	1.37743501887067	1.2589506321535	1.31140039734241	1.800804302015	1.33913695916129	2.30762234267394	2.12330153687936	0.688905705217724	1.98686426323616	3.42829990651279	0.00336049771239215	0.00904280735297918	-2.9323088533902
ENSG00000033011	5.27230683054041	4.98210043154406	5.09558633634526	5.0334935692636	4.90266993940347	4.77166912516835	5.01058715643472	4.73982576981689	4.41547224747903	4.14805850726431	4.99199282786972	4.22803723692721	5.71860708611099	5.44155595502196	0.192494413451874	4.91085450137071	0.882956412247743	0.390063855938261	0.48187852117586	-7.22515473509645
ENSG00000033030	3.53103962898212	3.23009788580669	3.07161832663973	3.18480838629952	3.1069012614196	3.14018352463959	3.1626397306214	3.77336903190241	3.99902922506871	4.06059667418379	3.84540483212746	3.94019520905948	4.14176213345553	3.97395227178022	-0.757851115863005	3.58297129442759	-8.70132928885125	1.55510404028429e-07	2.95354519833797e-06	6.9692258075024
ENSG00000033050	5.15845595622921	4.79472012906233	5.0199783544459	5.00019895541426	4.97555700866473	4.99958828568287	4.90815557021106	4.6612210966319	4.72102739169638	4.50507408173535	4.69204286105804	4.51876708066775	5.2686401263031	4.88498261999945	0.226196491836167	4.86488639412874	2.09645363467717	0.0519434270889518	0.0906125055324111	-5.98140082790506
ENSG00000033100	3.25519399177804	3.51412984924732	3.55012428498092	3.75812953821026	3.60328578419871	3.73050353581819	3.54849452866202	3.8366740204394	3.35830902272077	3.1905611315978	3.76415714932949	2.8319143304232	3.51394521528522	2.98073472373491	0.207311427285462	3.45972550760187	1.38621266523833	0.184305915149945	0.260502530866331	-6.88989376503624
ENSG00000033170	2.02387659487971	1.49409499478855	1.71556995586364	1.99551167064293	1.8503463762966	1.81842261972611	2.02777575619587	2.52135303014903	2.09201606145557	2.79126745350029	2.31592625032153	2.82030930667852	1.94414580827533	2.5404703400992	-0.586201871891321	2.13936330134806	-3.94401873818237	0.001119540552096	0.00361334607784682	-2.02161300781808
ENSG00000033178	4.03442319291006	4.00503873817867	3.60222868737761	3.49068608366122	3.58583999736636	3.3437362844212	3.61299175778335	3.86534307689305	3.81285987097638	3.78768915705549	3.96196135537267	4.38581501748936	4.2904832020207	4.26647837898848	-0.387783982487699	3.86039820003533	-2.97445420546909	0.00878629608376667	0.0203575118285787	-4.28593897434201
ENSG00000033327	1.5632103684213	2.18978094024442	1.5201741840191	1.45381869280041	1.43333856850074	1.12965664636842	1.1758744270152	1.75812743713471	1.75936698385656	1.12950204253356	2.22238658603387	2.69854965861484	2.45990294231211	1.851121281145	-0.498257864630246	1.7389150542143	-2.16428205799034	0.0455749539896142	0.0813191318445953	-5.31811733868629
ENSG00000033627	4.51308105831033	4.53346171601241	4.31853736079758	4.48575425778157	4.28417390552669	4.62872462619124	4.41896321864644	3.90844646856395	3.76582472794349	4.06070985249996	4.12673614376185	4.38042833842264	4.36484956068909	4.08796420097087	0.356526080029117	4.27697538829415	3.5889396946821	0.00238609332435665	0.00680439124900301	-3.00823312254881
ENSG00000033800	4.40797941967886	3.93502176625564	3.77844125340032	3.66075054000233	3.97704022494935	3.62973759582711	3.78128026295202	3.83585819838198	3.86739638173226	3.55127900852941	3.91228027534266	3.98231403428906	3.816355716572	4.08480181409888	0.0149052261109386	3.87289546371514	0.125827873059478	0.901403196886092	0.927778292541279	-7.9120741275962
ENSG00000033867	4.68663618249277	4.25846606224459	3.72065058876843	3.54042755863509	4.02087619462369	3.95941835761638	3.91260912481524	4.68698303521457	4.5038976083624	4.77233897292589	4.644986380564	5.10099978379522	4.29847732370024	4.77644831538344	-0.667919610080728	4.34880110636728	-4.37454331398215	0.000450169777391377	0.00170261540106602	-1.43918677052822
ENSG00000034053	2.79572488453538	3.30679642667474	2.81424695799609	2.89706543460242	2.90872878444864	2.96176291613931	3.45175718157845	4.02192545375438	3.34573541938626	3.62137183841458	3.49924628527147	3.95387368838395	3.11589868303962	3.51733219019353	-0.566600786081446	3.30081901031563	-3.60939057982025	0.00228425311362079	0.00656318334416398	-2.67964416979202
ENSG00000034063	5.18830566113917	5.41463770484814	4.92720470108438	4.83176030485345	4.91471923449687	4.42027797735468	4.89948831241637	3.9004023381485	3.584667791513	3.84884379791314	4.85018299830077	3.69548293601192	4.77280686063051	4.52644102540521	0.779194552282949	4.55537297457972	3.79482048878595	0.00153820898619895	0.00469564624304674	-2.43015587701224
ENSG00000034152	5.31100769045714	5.12144402843778	4.92780247789224	5.19174470307444	4.93571562436724	5.22608552214727	5.12248814526165	4.82140951548656	4.81475595014691	4.98422106848766	4.7851160629204	4.66493578569109	4.60846251920643	4.35673979606645	0.401189109619859	4.91942349211738	4.1988712560215	0.000652009636889425	0.00230803545338661	-1.72023719048702
ENSG00000034510	10.5033667883967	10.670040187673	10.5697509845162	10.8437487530286	10.8148720348673	10.8112587935536	10.8786979571673	11.2572084490343	11.5734594759891	11.7643327015121	11.0324952069912	10.885131814553	11.0862322532649	10.4100725248819	-0.417435065811445	10.9357619946735	-2.60815251709326	0.0187888949648075	0.038706777355564	-5.20224134540853
ENSG00000034533	2.30614251286362	1.83392683394309	1.78225975900846	2.16951648585533	1.33745004308247	2.02865051342313	0.924805827810279	1.70993352634248	1.91699664326435	2.03802552983678	1.6499645313651	1.51263828458733	2.1375606903301	1.99066533479267	-0.0734211030346075	1.80989546546466	-0.378261014688265	0.710105281866709	0.775198796806863	-7.47011181439173
ENSG00000034677	2.08139401527698	2.00779779212676	2.24919657847182	2.31497460047865	1.96567330733725	2.11671076117546	2.12232922060486	2.07821633789112	2.02729048003848	2.5650947633433	2.1288126383362	2.33833192961168	2.74323783426431	2.29500469724402	-0.190675493100197	2.21671892544292	-1.56711641916192	0.13624493385963	0.202693691480938	-6.55069086247754
ENSG00000034693	3.30630517139171	3.40582538478262	3.45060492455663	3.4595328116283	3.53457100989031	3.43674464221087	3.54777982019933	3.78705485706271	3.47975942510656	3.25757781607952	3.41927128378855	3.13284620054739	3.63016776495618	3.79152685465532	-0.0557117585582816	3.47425485477543	-0.504029392200477	0.620967821126006	0.699407676376515	-7.7068099031851
ENSG00000034713	6.10103393721337	6.25178687568524	6.15056283422352	6.22911885567804	6.12593668733785	6.25673538987764	6.3274962004653	6.49788811896085	6.51235588474579	6.50080491765834	6.19996914746023	6.19587801130563	6.33055681736727	6.46606119754036	-0.179436041724065	6.2961560625371	-2.30078674823626	0.0348851267045809	0.0649016932316499	-5.58494240103819
ENSG00000035115	2.18813423023703	2.30036237342147	2.32439375206406	2.53275278383897	2.3702404300038	2.71615510234996	2.44160486210253	3.40393335313153	3.49014962712129	3.52810219681067	3.01357527652202	3.27423261446197	2.90308220897431	2.54571537881309	-0.757215382934941	2.78803101356091	-4.89003531753672	0.00015406372132076	0.000708926106689969	0.0356503874816205
ENSG00000035141	4.37121469791482	4.30416418262586	4.5421014333443	4.47629459714671	4.0819414198937	4.40417155184359	4.38919233290882	4.45055499556368	4.14614920923042	4.35685789960755	4.43370806362501	4.12228251483388	4.80339924548991	4.75979103428711	-0.0698657873451998	4.40298736987967	-0.571096551880242	0.575704523013822	0.660467503968445	-7.61905218930062
ENSG00000035403	7.40478380684911	7.47452763222266	7.47132366924824	7.58536953808665	7.79820100742904	7.71375394955079	7.66607057862319	7.90585645995816	8.08276194129592	8.68139495491094	8.18683929699205	8.93078226608176	9.13801048799556	8.04727560183538	-0.838447930298911	8.00621079936282	-4.85475101044933	0.000165660901760828	0.000749492077701433	-0.51333893789467
ENSG00000035499	5.09181714340921	5.43151323198752	5.36900553555743	5.19740535548416	5.2901048950833	5.29963430431388	5.3359546147251	5.63292948742629	5.60488832258848	5.38956351336549	5.55404535344473	5.51211124677046	5.54179451551019	5.65601979261148	-0.267597487092383	5.42191337944841	-3.88507286958401	0.00126916517769899	0.00400492853973929	-2.45803419657979
ENSG00000035664	-1.18608245838574	-1.6365821057189	-1.45814331017426	-1.30762369887074	-1.21810646622651	-1.22563692909362	-1.38533120929447	-0.419912658794312	0.488866257897628	0.643618272033807	0.214662702399677	0.415288203819339	0.11859476633306	0.0780007304272468	-1.55512198594229	-0.5627419931177	-7.53524975695815	1.04651004462567e-06	1.31310038692155e-05	5.71765325176256
ENSG00000035681	3.56155232108575	3.43929212530106	3.35799810784902	3.04054611209794	3.38476491872237	3.41644261198802	3.45368034198751	3.48307362661806	3.2837538349946	3.40572799417071	3.52393294282662	3.57558261213351	3.55983183671369	3.47061242555363	-0.092139100130896	3.42548512943161	-1.06219252233767	0.303593846009151	0.392796927796043	-7.35570095306181
ENSG00000035687	5.6700187710792	5.24655264654174	5.5809441513593	5.57631365818285	5.39588931549837	5.30767858646868	5.57506893133166	5.42502623998459	5.69534304153749	5.48326509263156	5.73427015822589	5.61683300879127	5.91484962500348	5.93180964806216	-0.20739981396375	5.58241877676416	-2.10882789391625	0.0507240005701128	0.0889826766991701	-5.99569746548782
ENSG00000035862	4.77226286124418	5.02265625552886	5.07287881796462	4.91644523866866	4.94081873723881	4.89592113898629	4.95836614801025	4.33026954934475	4.51079854965169	4.90793029404181	4.81142825551671	4.37189099500199	4.7428754677635	3.89060256434545	0.432131202565076	4.72465320523626	3.2740470506541	0.0046655002116609	0.0119168526917366	-3.4471877316586
ENSG00000035928	5.49784594121266	5.22661113597899	5.17187426483858	5.14653397059308	5.2176082678992	5.05863349318411	5.30406732211885	5.40437565477132	5.42822876626123	5.15761649832075	5.44815918897346	5.48829193172101	5.2669632508601	5.32143581743801	-0.128077320076538	5.29558896458367	-1.67777130588859	0.112410717957666	0.172746319225095	-6.79483667602433
ENSG00000036054	3.33974507805506	3.17027253183154	3.0929125635555	2.86654732593689	2.93269155746181	2.75885892989545	3.01962389980291	3.34576448767856	3.37070631480425	3.33952193954749	3.18115261272956	3.2039087127865	3.23810888626466	3.18843363525801	-0.243481665593253	3.14630346254344	-2.65051014110391	0.0172265021742294	0.0359505757823295	-4.83428394897879
ENSG00000036257	4.57553109548041	4.38191474926697	4.53365654717911	4.52230301086	4.4641945970344	4.43116234475129	4.52421769204584	4.49207670518144	4.46663109565486	4.5564268183498	4.36347661266605	4.42027056855096	4.27539693132057	4.42334687771816	0.0620839922655083	4.45932897471856	1.02001240489432	0.322586325407217	0.413066614048526	-7.63591483912147
ENSG00000036549	3.84458374675729	3.80274913986415	3.71139016032166	3.57414121819271	3.86095673801075	3.4947879833643	3.71927310616253	3.79030834350725	3.67532567055179	3.66250517148186	3.92987479966667	3.96348715315906	4.02978932943589	4.02132321884673	-0.154190193306554	3.79146398423733	-1.79922115383881	0.0904754601254646	0.143963501789388	-6.53043126251942
ENSG00000036672	1.11158050047356	1.28161876774037	1.74051179532764	1.44070146575681	1.80410804121331	1.94546155760391	2.11799028216384	1.75933725334822	1.67996957658501	1.44546982825426	1.58142941076221	1.40189357827053	0.983180689593459	1.23392911423919	0.19584469317564	1.53765584723802	1.13964009231006	0.270865435089478	0.357521224430543	-6.9437404316275
ENSG00000037042	3.91794668834847	3.84598372493603	3.82653273730342	4.2495754626961	3.74713960306468	4.30054228867533	4.02834140605154	4.2183929723016	4.11627894902349	4.66506961751729	3.98495214894066	3.87437020990213	3.69502154789286	3.76864735552229	-0.0503316192628001	4.01705676515542	-0.322563405473152	0.751115995456921	0.809083350801503	-7.4996761047344
ENSG00000037241	6.61532529025645	6.59060099279139	6.94747050551283	7.19231682096367	6.79840630535953	6.93984872172768	6.84358483435353	6.7715226682744	6.70076121618738	6.65793973709606	6.21733552405924	6.13353337910163	6.2496686961255	6.28546649935122	0.41154294855657	6.63884151365432	3.17109614144707	0.00580372419218693	0.0143600583742848	-3.66046901218551
ENSG00000037280	1.94176150944407	1.92354068351058	1.90614931606765	1.79257125370093	1.77095764210795	2.3000354434396	1.55259460588666	1.7658887646117	1.99974162454003	2.14458920249687	1.67148207849545	1.75450488033961	1.41439240938036	1.16278509863796	0.190222266166488	1.79292817947567	1.22831894778938	0.23672426659959	0.319468820943736	-6.84735641856138
ENSG00000037474	6.69311688775328	6.67556983911822	6.77768036897279	6.69837831546222	6.71486976715706	6.67176192295262	6.78906767943283	6.76401254425028	6.85205081070068	6.65590407572388	6.67182112605529	6.40483064431511	7.12110107621597	6.97593245956919	-0.0612011834608488	6.74757839411996	-0.669534449056208	0.5125040549445	0.602442230319636	-7.94394273775697
ENSG00000037637	3.68194603148875	3.36291367524157	3.52282639154789	3.51558350208639	3.29160915693416	3.22256421744017	3.42341732576284	2.85789142750332	2.76884645235251	2.86884484702057	2.96876532218954	2.80777370103301	3.31236608127659	3.16973000098	0.464955587347017	3.19821986663267	4.59350633384011	0.000284631838515416	0.00116289161012794	-0.820222319397836
ENSG00000037749	3.49122037515445	3.57603655611937	3.47710381119802	3.34634643351284	3.59779895575955	3.15110367394282	3.39484175524868	3.15034344901782	3.16091306897934	3.16426383954314	3.3980629077619	3.40219677073831	3.71178344398816	3.49234945154837	0.0756345237112495	3.39388317803663	0.734806342845151	0.472870958412231	0.563969861326336	-7.72411026355208
ENSG00000037757	4.23347475463614	3.67357210508813	3.31731070403144	3.77772576978851	3.74099701534825	3.79822214317779	3.76807088199198	4.22735372725797	3.97946075844157	4.11676416093462	3.88449620241553	3.94927556847457	3.64932902284043	4.07076683985572	-0.223791409659647	3.87048711816305	-1.62859072352555	0.12252242209339	0.185567496179523	-6.27699184559184
ENSG00000037897	4.21655989925743	4.35497660685792	4.60887535472372	4.58411397889947	4.52630588935004	4.32954786235428	4.39125055023768	4.29181610839062	4.2077735253819	4.32105618023436	4.30393195189399	3.71004890810818	4.88611145775623	4.64208324591557	0.090351602148977	4.3838893942401	0.624892995464163	0.540669068406889	0.628268400952859	-7.69062304812584
ENSG00000038002	4.12833766139098	4.29187301654679	4.2238607622158	4.41317381923599	4.17420923535886	4.44136401314722	4.69968975377952	2.68823040482496	2.20220867253696	2.41154608423661	2.82665994780745	2.07372810655402	3.0168159287325	2.89086467300681	1.7539770348225	3.46304014852675	11.3458744864045	3.65805681971534e-09	1.66749848512192e-07	11.170340029266
ENSG00000038210	2.64774434979749	2.85207190372809	2.9581915793219	2.54587813102486	2.73238414759046	2.98967482173587	3.14070695497163	2.99755844617089	2.8312450738011	3.32033288455635	2.97960439073758	3.08326594752489	2.89333744801237	2.93442477045753	-0.16273757858993	2.92188720353079	-1.57675095140536	0.134011968807322	0.200252875672673	-6.73935804472377
ENSG00000038219	3.92643928773507	4.03360102335135	3.81989389108546	3.63902650745375	3.80346971051297	3.79268314638557	3.85013529615779	3.93461927526659	3.82012761232217	3.63823057931203	3.84211437800377	3.76340352336805	4.09310985198463	3.85047719129534	-0.0117298332981028	3.84338080530247	-0.149871619551679	0.882700019568258	0.913860321381871	-8.13789268575658
ENSG00000038274	4.9359645873559	5.39607577458927	5.50283766552806	5.28497932014404	5.27048219093939	5.43571539547569	5.15788283530482	5.35160737142991	5.36620065576461	5.62792247483867	5.14905713535005	5.13933049420152	4.94873748883488	5.18478374866532	0.0330753983254928	5.26796979560158	0.310411828470115	0.760171645525824	0.815949298676673	-8.08700274762403
ENSG00000038295	-0.570967668498031	-1.49768171706377	-1.02442239184218	-1.74554381422473	-1.08025028049096	-2.26248845174291	-2.51340700959559	-2.73794267352452	-2.53213733938745	-4.29314001813334	-2.94023364756486	-3.03885872320269	-3.436881864413	-4.04577879050158	1.73568960217777	-2.40855245644183	4.77890717952891	0.000193714277332906	0.000847482555506399	0.486715419002577
ENSG00000038358	5.48979064060756	5.43954374527009	5.39635685677754	5.33630430225608	5.29230471056208	5.45370694342106	5.34577274158965	4.95250351327731	4.93287352405052	4.96213278362181	5.2083761774247	4.65875915664424	5.1458634664719	4.95090463885959	0.422078019173192	5.18322808577387	5.34055946639839	6.17387868364735e-05	0.000332929895696375	0.602266491754673
ENSG00000038382	3.86926136460188	3.76464311853037	3.41751883507778	3.08825955044527	3.33131616395743	3.18228036415646	3.32573661959179	3.30805814050075	3.22237467777463	3.56764267903546	3.31760352775368	3.63715408264854	4.59361907498889	3.59197141963936	-0.182272526984841	3.51553140133588	-0.981112601308013	0.34083986621458	0.432076034964864	-7.64990243929944
ENSG00000038427	5.44580926277851	4.25975601862849	4.383163498493	4.96659795921207	5.17402919878675	4.00758276356098	4.7486801381889	5.97795436245061	5.40059341319439	5.77392705538501	6.06721323526449	5.50051875641614	6.5149499484635	5.57447972355186	-1.12274803544323	5.27108966674105	-5.22266733618531	7.82509919195421e-05	0.000404241435760928	0.284067396703639
ENSG00000038532	1.49841471093359	1.39784532308275	1.15432004296409	1.25149876655904	1.27274505437779	0.814553121779309	1.16313240138084	1.19014921046561	1.35333500670467	1.35756885306841	1.55752339677725	1.22599982584236	2.2626254404971	1.571038208269	-0.288353405153017	1.36219638305013	-1.74601192825869	0.0995771399163498	0.155958482810693	-6.2005331810335
ENSG00000039068	7.07844183663798	6.68233244165746	6.78174752520315	6.62984817351716	6.89869536582142	6.54518152908224	7.05957676750334	6.37745614248236	6.20761024739255	6.39128303054934	6.95773717683988	6.92084415888048	7.15093657141412	7.0181691436323	0.0925003300777139	6.7642757221867	0.624128304357671	0.541158812708751	0.628597433620749	-7.97259516614227
ENSG00000039123	5.88335688641629	5.99011382141658	6.02566584092093	5.98178901002525	6.07815392885341	5.90396011282592	5.99091853564429	5.97601097650663	6.10828800403956	5.70473327482603	6.08334591773406	6.20506087128018	5.95758090103885	6.27264982029388	-0.0649283530254321	6.01154485013013	-0.80745837700553	0.43099893148157	0.522530928883572	-7.8411059989574
ENSG00000039139	-1.90134362365768	-0.691338629947847	-1.64726374830999	-1.5333121443801	-1.58387990919834	-1.53669245262778	-1.82705954163083	-3.13842068053364	-2.82290141718208	-3.01036086953865	-2.63052966882132	-2.39265924304229	-1.05597260097771	-2.15699115278491	0.923360391132234	-1.99490897733094	3.20507913584572	0.00540062341721842	0.013499894765037	-3.03461476746106
ENSG00000039319	2.53692709033175	2.26810648331159	1.72967819774743	1.96509873420079	2.08788872082826	1.97494600775411	1.93774633267014	3.03707916144393	3.07709728942188	2.9151273473008	2.83975213685298	3.63257376523964	2.71825092276501	3.15663811068977	-0.983871115350548	2.56263645003986	-6.8067529995433	3.76821146751639e-06	3.52791552085708e-05	3.66804211753645
ENSG00000039523	1.68032661109141	0.79100202889291	0.595509538429446	1.73527701460318	0.632482360538945	1.78973104924274	1.32063529285581	2.32167340771147	2.78204444778529	3.81625664501253	1.57620462493622	2.04964514918113	2.20624453643676	1.4710992693177	-1.09257023626416	1.76915228400254	-3.23416472375403	0.00507761934710753	0.0127949699945436	-3.21883502079152
ENSG00000039560	5.64386236710472	5.35402245830823	5.45032733465551	5.84288353101616	5.78747870647217	5.47820178657791	5.66327273264136	5.56776452934777	5.93944025111954	5.92825446382449	5.87533049862972	5.59722881509024	6.37704312284682	5.63023241407771	-0.243661664339389	5.72395307226517	-2.03554889094255	0.0583445197054076	0.0998890349324118	-6.23493625066763
ENSG00000039650	6.11218895999504	6.34181713162519	6.66365027227564	6.77768301402017	6.56030500018315	6.98775647232819	6.48016920576151	5.85808478814462	6.11251521337125	5.97269334895788	5.85136591194452	5.78292545707441	5.78421407696506	6.08429172785365	0.644106934503426	6.2406900414643	5.444410893838	5.01761310989928e-05	0.000280778708784295	0.872636918721428
ENSG00000039987	0.555106319520946	0.339939116384589	0.121378406384548	0.395774620321545	0.32583987245713	0.857881228731857	0.113062627488179	1.65670407324302	1.13521717777854	0.88088977442212	1.28604914180728	1.4962678453919	-0.179347802470721	0.479723347544926	-0.573011717289656	0.676034696357561	-2.11179956780672	0.0504350840051621	0.088590866154625	-5.13903886221945
ENSG00000040199	3.47672420907257	3.15904169609174	3.45196950416151	2.94533928717046	3.37790273715307	3.44014545365252	3.44280258106954	2.83347398838314	2.61013455168428	2.69178425147755	3.05966730235182	3.23804490194074	2.84899705489511	2.65443993570865	0.478878742919905	3.08789053248662	4.24350232948186	0.000593329718860253	0.00213021121187261	-1.59886817725352
ENSG00000040275	5.31653806422986	5.48191575578512	5.54036151731921	5.4678351563672	5.47327061389686	5.36885181367925	5.50640782231215	4.60034355210377	5.33117353435937	5.31561324575234	5.12775125396925	4.94011620664912	5.16176607074131	5.2879822067903	0.34682383498323	5.27999477242536	3.36538157092877	0.00384217038037846	0.0101153051480827	-3.54575782566739
ENSG00000040341	3.53794541902228	3.7524680572745	3.42352910969739	3.30483941112609	3.694013816511	3.60694642916604	3.37725654632576	3.58315947651215	3.58544142314369	3.73350005764233	3.48325341559571	3.70411251206864	3.30317644959568	3.57953352362125	-0.0368413760416066	3.54779826052161	-0.410278473837909	0.68693027723257	0.755933852097433	-7.96887786787706
ENSG00000040487	4.08094916335164	3.90040934693991	4.10087228422298	3.92402401313722	3.80169895995643	3.83350031522952	3.94964878156547	4.17751074162613	3.68344269099587	4.43762561505973	4.00129848438629	3.66440329063914	4.36266350057699	4.02604690071901	-0.110931737989195	3.99600672060045	-0.811459843416608	0.428762882319187	0.520545939222626	-7.263466732633
ENSG00000040531	3.4960042940433	3.73639417497393	3.51790201304235	3.38064985123813	3.53222380743718	3.461262554577	3.58049944278939	3.17046241491595	3.00732721068041	3.36079531793585	3.23562798689885	2.94163234081839	4.15931908028249	3.68130907588275	0.162387914077501	3.447243540394	1.01376382629025	0.325470576907518	0.415928432543196	-7.29484407409284
ENSG00000040608	4.50037525145545	4.28920164925785	4.57614976600685	4.55341015256921	4.50883032672947	4.73695055142555	4.64666521349626	4.48401410936323	4.44608498714883	5.01125635985369	4.48005854937502	4.43317960216877	4.19762704341551	3.97667577859571	0.114844602133763	4.48860566720439	0.905858580170402	0.378173192298679	0.470420608146685	-7.50033281430303
ENSG00000040633	6.03047463251627	5.8777889301913	5.97018474051638	5.95565987132968	5.88980704964146	5.90284392375929	5.85785313455866	5.26865212762605	5.29087367040597	5.50046486685614	5.52895161416045	5.03729106403927	5.75064355127471	5.55585262028285	0.509651542044637	5.67266727122561	5.41001658396054	5.37353244748993e-05	0.000297548969146496	0.795716981703416
ENSG00000040933	3.52558242716839	3.59973947448052	3.36188549193059	3.19808863241392	3.41128950759699	2.98819244558931	3.01872155762515	3.24566047843526	3.21137528923761	2.95753831408727	3.70152594764117	3.7483092689138	3.57737789773416	3.56863709845177	-0.131812693554072	3.36528027366471	-0.956784760942037	0.352617132212137	0.444377390319006	-7.46604428140736
ENSG00000041357	7.91700116522897	8.06294896734625	8.15575639464378	8.31490862810677	8.18896354097316	8.19192488634631	8.18215666161188	8.68078793808587	8.89995811964567	8.81887640905299	8.32541252982826	8.4718746962264	8.22611691886956	8.45317512878017	-0.408987436752202	8.34927585605329	-3.96196416017252	0.00107761854899799	0.00350593300183228	-2.36296511229212
ENSG00000041802	4.40782987405433	3.97921937459824	4.12085888619472	4.07274877759832	4.10443273329886	4.03581918681817	4.32751070460628	4.36498008240826	4.19817546388815	4.34917572218649	4.5600616216448	4.60099534867433	5.0062193872871	5.00086442834593	-0.434855255467204	4.36634939940029	-3.30221978800614	0.00439447479056338	0.0113364037041007	-3.55147573700304
ENSG00000041880	3.2978622789163	2.1462788441235	1.99886753081845	2.49499492448416	1.94824613508022	2.10859165995611	2.28086826192883	-0.748814996767708	-0.382034430215134	0.318615050708263	-0.326398595493499	-0.151712075331482	0.211722058047719	0.520807504036339	2.41440233466705	1.12270672502086	9.43129800981713	5.12783222918807e-08	1.29215002197615e-06	8.6258391084898
ENSG00000041982	-1.66709177176004	-3.09586519041302	-2.07721479526647	-2.4921426144934	-2.61206672136868	-2.71360011001036	-2.29064924804278	0.49432295598136	-0.186900782131477	1.19504451183598	0.746557453464737	-0.562511036932075	2.34850862436462	0.136810466904011	-3.0329911481158	-0.912628446990542	-6.20041458023494	1.15646895510131e-05	8.6777951002084e-05	3.14906861745798
ENSG00000041988	3.16721528151377	3.18818614284594	2.81596810017969	3.07026662858503	3.44161256390682	3.27716478546232	2.84723237803735	2.92792133325494	3.27006471319382	2.93470197806478	2.69034664350912	3.0105390474658	3.10492874996057	3.19439965077615	0.0945400006797281	3.06718199976829	0.639359313198365	0.53145002157957	0.619804351537462	-7.10972247734081
ENSG00000042062	-2.08442326492326	-1.67996491927947	-1.79343885089048	-1.26964631874911	-2.70879065458952	-2.58986283901455	-1.71849368211365	0.750674335098914	1.18982271326115	0.730064306764336	0.213845678414481	-0.261389485992878	-0.58728949071309	0.372300344614506	-2.31574922467132	-0.816899437722331	-6.95717306557244	2.87540525554845e-06	2.87800636227633e-05	4.69734129496129
ENSG00000042088	4.69991013180306	4.70032241967152	4.92652991452031	4.98119425592454	5.11031569164589	4.76438898072236	4.91321921915491	4.6799053497289	4.76918638280138	4.72613058681515	4.72500946426884	4.73654289144844	4.39341620401717	4.60759251526176	0.207445619990414	4.7666902862703	2.48606259753482	0.0240843679525873	0.0476868134620043	-5.33141486803806
ENSG00000042286	2.7459181424611	2.32836392523434	2.79791328231025	2.88356427255801	1.92304884280125	2.96728255052509	2.90333107697735	1.71741903771433	2.0825813436012	2.09761667708771	1.70467988956066	1.81130807559473	3.2118167041633	2.55818380632685	0.48416066378533	2.40950197335115	2.04121196557417	0.0577204147417036	0.0990574122703433	-5.50498983247713
ENSG00000042317	0.416240795212675	1.14770146144502	1.32231355182234	1.40816859848791	1.26550945758484	1.54746893131406	1.30110361088612	1.2050201723162	1.63134305660081	1.62836303280106	1.34203093399158	1.37001680444803	0.82255406365651	1.35198713512645	-0.121353004293128	1.26855868612097	-0.705671325044168	0.490330410236209	0.580978526380929	-7.34472983709543
ENSG00000042429	3.33211261418383	3.49006102432892	3.27649343822807	3.18157336361218	3.28019864873017	3.02620699514005	3.33863051626293	2.85062038419842	3.1109811763148	3.2536681358658	3.2446823180003	3.3054079096275	3.58198099524343	3.36427959441073	0.0310668700467014	3.25977836529622	0.289256957973669	0.776022170641601	0.828542760808669	-7.91422798435556
ENSG00000042445	2.86079380953904	2.94297903112363	2.07223034179456	2.26637231648742	2.25617703142993	2.65313113130717	1.26992275169565	3.2616102269241	3.21931616754097	3.27099603042967	3.00800701520754	2.87856496572073	3.28772109464981	3.66929594159864	-0.88370907171919	2.77979413253206	-4.2103471442705	0.000636381301395648	0.0022615227245659	-1.25270992911683
ENSG00000042493	5.80746029205341	6.35892924669125	6.24612096189825	6.20105411317471	6.01061298770575	6.29573277351592	6.24938196493844	5.49387799776471	5.80267766504933	6.14509153071082	5.06024963109239	4.78727986456461	4.66137378411925	4.77620894364533	0.9246252577031	5.7068608397803	4.67420616107633	0.000240638384554892	0.0010148336030553	-0.764673342399197
ENSG00000042753	7.34220943933987	7.6813497892618	7.51432653399544	7.64194625597872	7.5827418056376	7.74456982400338	7.58540171890066	7.91070859603543	7.87482639761685	7.85314731025325	7.5952070078629	7.43154355033048	7.39510378584429	7.58958571884656	-0.0787371708264795	7.62447626670766	-0.820887886429409	0.423523672620987	0.515470661947003	-7.79590523251016
ENSG00000043093	3.00062658735887	3.14238191577798	3.0536443308353	2.59265853024994	2.90974841976576	2.96452077080898	2.92861362457653	3.40272408387487	3.05750554939723	3.17553262177468	3.2102295072885	2.98964486780348	3.28998772763629	3.19722557194979	-0.24657657074495	3.06536029350701	-2.68418159786381	0.0160740717317724	0.0339295052111346	-4.8376778121674
ENSG00000043143	3.27373345715362	3.15701607666048	2.71696257295412	2.59595746426409	2.66418258519355	2.71644686783403	2.63127536035433	2.40411364489002	2.38267541125967	3.1368994800913	2.70257127549125	2.53422864078164	4.35413506259226	2.98395270392709	-0.108562926745498	2.87529647167482	-0.429349544858514	0.673275811228003	0.744204876801019	-7.93524307671063
ENSG00000043355	6.55436811151134	6.64572185498496	6.49118967041313	6.5815870706183	6.83021254666973	6.6048889149524	6.38730975573702	6.82179706186328	6.39375233963925	6.48407354146194	6.90092898279117	7.35340427827785	6.30568054749773	6.26098082296228	-0.0620525882627838	6.6154211070986	-0.428512479783423	0.673872709969719	0.744526575257939	-8.0918688584607
ENSG00000043514	4.39272456410382	4.58389044111929	4.86998079036077	5.14697344171195	4.90363414908749	5.0847836128424	4.89777271546168	4.95809999783586	5.27450935606781	4.91482560208372	4.54396479853342	4.53191478402277	4.47340484871648	4.51896342297381	0.0939176306241754	4.79253160892295	0.657063390757007	0.520287280721852	0.60976567103184	-7.8180305401198
ENSG00000044090	3.35712099126726	3.78486034759713	3.36266704124946	3.59450150844792	3.50844058871837	3.9147356957291	3.47224846319353	3.55072476804993	3.76331515202054	3.85633172786977	3.93309544048272	4.06139459968928	3.33864548825581	3.79071579716383	-0.175485035242837	3.66348554355248	-1.46265611168242	0.162527551081778	0.234485872951199	-6.95791738410011
ENSG00000044115	6.74315051151581	6.81451724243127	6.8258011509459	6.83087140325904	6.79519298385003	6.92767693625291	6.95998094103911	7.05090040611779	7.04855393774169	7.23071370829763	7.03420974022956	7.10654561904801	6.92358534544753	7.02823620497637	-0.217348564570165	6.95142400936805	-3.61983338221669	0.00223393748317656	0.00644295097339857	-3.12854429103324
ENSG00000044446	3.52792799385562	3.73450542044767	3.63435706756473	3.66020711169416	3.5504912023489	3.75359094248105	3.70200492040525	3.56761730700405	3.37430471551407	3.87421363050115	3.58758662323699	3.63750732937116	3.48667017685056	3.54180539126735	0.0739369537221712	3.61662784518162	0.92063754252554	0.370630961475315	0.4623295513084	-7.5793194108333
ENSG00000044459	2.74943969569076	2.29947915019524	2.37558532084775	2.23430589394895	2.14844011585674	2.10356298432991	2.20724481872397	2.3788633460151	2.48501509144532	2.13860949288483	2.17937514613219	2.22164313993079	2.46480657636872	2.26818255508178	-0.00855288450122815	2.30389666624658	-0.0804859497389063	0.93682821165501	0.953595062645573	-7.85556546287927
ENSG00000044574	8.38364610968173	7.73815527008577	8.09236515983605	8.13164451528542	7.97445263880875	7.87208435359434	8.1543571581452	8.09121372511012	8.44473855625457	8.44680309551211	7.55697684510303	7.13115915484102	8.68231050242084	8.34054735522796	-0.0506944113755736	8.07431817427907	-0.254553710387229	0.802243294057317	0.850679833766475	-8.18927035927811
ENSG00000046604	7.01243343637765	6.91934935904892	6.7301297441153	6.59789038217019	6.89449122013805	6.50109121764315	6.82392304726263	6.54176903882948	6.47064804377132	6.39984614200558	7.10059429165751	6.70230480069776	7.13416485626383	6.71275765713665	0.0589746191239868	6.75295665979414	0.487303163754881	0.632515683469927	0.710048734874791	-8.09510061196726
ENSG00000046647	3.90302309265246	3.9912452504294	4.28194394697819	4.11256910352608	4.04762160591598	4.34849981473369	4.27032308427922	4.15998835758894	4.12211822775497	5.0200878054009	3.74160862527236	3.93635564568977	3.14263845578256	3.81830316464403	0.157715986702621	4.06402329861775	0.782157009544637	0.445308088794215	0.536937264584346	-7.5195817494789
ENSG00000046651	2.17110102007101	2.27076194048583	2.57764527603822	2.50200902214814	2.49581247363899	2.78709301143413	2.56855327376751	2.65008554516576	2.82777034840187	3.86596791140259	2.13054818025319	2.16152239528524	2.94412652123487	2.83867019771216	-0.284918065741648	2.62797622264568	-1.30669624560856	0.20940653453818	0.289557706414927	-6.805115977319
ENSG00000046653	5.38961395072956	5.25946898117832	5.41260470094289	5.0446037322818	5.32020475967477	5.46250215848171	5.47564254597066	5.99392925405615	5.20367734076221	6.34641130029682	5.30952458771216	5.24738675205075	5.21531848979632	5.38685635245496	-0.190733475608647	5.43341035045636	-1.17135538518791	0.25825210073312	0.34378063196137	-7.47252953233723
ENSG00000046889	2.79196889172943	2.57613552855516	2.52567033822562	2.46177941277817	2.03665310967863	1.65305282868933	2.54832310931092	3.46608050847693	2.46267030511917	2.52055134499964	3.79676176476851	3.61076628425102	3.07850167625719	3.62696427449974	-0.859095429952151	2.79684852695282	-3.67148757449104	0.0020008906488485	0.00587665060017738	-2.69396476312553
ENSG00000047056	2.6942488156926	2.93428254450698	2.9770803488389	2.98233746875876	3.03052876289182	2.95676897757375	3.01534460373418	2.72993149537635	2.89071338081457	2.62052840476315	2.82846755596565	2.8346242495403	2.78472887790313	2.71113360122572	0.168661954877478	2.85647993482756	2.1081680464539	0.0507883584737589	0.0890699007181728	-5.79839371635785
ENSG00000047188	4.05039167440863	3.55232778484893	3.48292621998794	3.22005409344768	3.18633599746306	3.57113467216153	3.39335978692523	3.27181548149408	3.48121699019968	3.61947975654516	3.45050443394346	4.04777182506282	3.30167105996423	3.08015129470693	0.0309126807220559	3.47922436222567	0.211158822862965	0.835374043793955	0.8762679899178	-8.08758988913013
ENSG00000047230	4.71661452550524	4.51525985731739	4.50549310037082	4.57645378240753	4.66317480347641	4.87740308700158	4.60047009323267	4.76065180196694	4.21182803053136	5.2288864283539	4.45844834787451	5.47985136933536	4.6009960567132	5.28737831678125	-0.222804668745091	4.74877925720487	-1.31059200730327	0.208116505220999	0.28805106570991	-7.23319256778572
ENSG00000047249	4.38843427034356	4.50796932733512	4.76244035104874	4.57242950476661	4.62551453318386	4.40174888294239	4.56862169404317	4.54687797337062	4.2579310927768	4.40530722525884	4.22062252825863	4.052941982346	3.95375836927716	4.01918162085855	0.335649069981129	4.37741281112929	3.34874948761689	0.00398055616317011	0.0104348797361463	-3.4794370551124
ENSG00000047315	6.12272710393023	6.05122265087227	6.06543250941456	5.97137268406548	6.03319458791456	5.87936107981545	6.02305015297295	6.01724131596563	6.0217027941481	5.71622315878965	6.17943495934495	6.04750779393559	6.3488518368025	6.41597396961107	-0.0861325283072842	6.06380689982736	-0.92397983034298	0.368939526201914	0.460597289301825	-7.747265396403
ENSG00000047346	1.33385720068839	2.08606648353891	1.40340470600182	1.59607414383907	1.39544678866828	1.34182596145708	1.4980705908792	2.08321071230804	2.27534208724616	2.46474006418238	1.93740285250679	1.69712164461468	1.49953338469909	1.72852677500195	-0.425668824583995	1.73861595683085	-2.56592494101085	0.0204806864150164	0.0416700826407831	-4.70381958715252
ENSG00000047365	0.0541321546263616	-0.696787436780876	-0.813135467108121	-1.12871210589882	-0.708329899033222	-1.23336710040105	-0.959194940845268	-2.520291964406	-1.9559702972432	-1.34418538060325	-1.11832333199564	-0.597207266998642	-0.430316591581406	-1.25821186996933	0.534646715664343	-1.05070724987418	1.73810650830062	0.100995478089329	0.157834612715103	-5.66550204628338
ENSG00000047410	5.72495780972266	5.73698178109688	5.61504365200499	5.56101543126678	5.72477372146355	5.53202686506716	5.68875425621784	5.52465159145899	5.58485675069963	5.61133345465789	5.74181091392682	5.81420796618049	5.77371089089522	5.80979929826062	-0.0395042936395003	5.67456602735139	-0.594715991284289	0.560178172222001	0.645672334254132	-8.02456459139393
ENSG00000047457	-0.827813475621747	-0.784987426619119	-0.335800244014815	-0.83369313061245	-0.503216887098535	-0.887855275929847	-1.19719681535327	-1.75640462973456	-2.824152629567	-2.46212101642109	-1.37921636216971	-2.50777575052077	-1.16833841177084	-1.89190351526465	1.22340037805491	-1.38289111219274	4.79773671860567	0.000186324562334419	0.000820461739570266	0.465036418410694
ENSG00000047578	2.08294072153069	2.3280407861465	1.87571091366794	2.01599598289954	2.0768283874145	1.96185261154796	2.20644504720451	2.0716599049622	2.14920724812618	2.2364410081277	2.09198166381099	2.33283862976116	2.58249359841419	2.70486651065805	-0.231360410056517	2.19409307244801	-1.99436317470764	0.0630706897599099	0.106349870472134	-5.97158751439074
ENSG00000047579	2.52740364213894	2.90510498813704	3.38883034288017	3.19676218497487	3.15930896128397	3.55791888173284	2.67345196392747	2.58935251612088	3.0733689280791	3.07539919523264	2.52844339821183	2.70156087687358	2.38724734149117	2.64639228698824	0.355842111074082	2.88646753629091	2.10147459436511	0.0514454378943004	0.0899629920418865	-5.64743820225095
ENSG00000047597	-0.151722627023229	-0.35435475833986	-0.0637222172572001	-0.753088207360006	-0.0437596738113131	-0.415027445773114	-0.345295257921635	-0.266982904155776	-1.86822329787778	0.0696674154171659	-0.916446336559574	-0.471938016083377	-0.588104915123412	-0.637218056914559	0.355640017551233	-0.486158307055977	1.48123402545578	0.157567645432894	0.22852190330836	-6.18764925408747
ENSG00000047617	-0.643120228998211	-0.64583199538939	-0.279579491094921	-0.696397916317554	-0.195799402732814	-1.1248691974271	-1.11073442292529	-0.178135933021372	-1.63175457822802	-0.907223847366023	-0.80294829762683	-0.895197181663741	-0.614605930320152	-1.12343652719473	0.183656385648808	-0.774973925021867	0.793663044569529	0.438764421959178	0.530624183194073	-6.81747485200579
ENSG00000047621	2.53628139715142	2.58017175352035	2.56286076371022	2.48158874898016	2.74121878884093	2.51080406243935	2.43272029695842	2.13966354449318	2.10783799862648	2.18227084203483	2.15699191905617	2.24444549340191	2.55917082263921	2.43771727120392	0.284899230590238	2.40526740736118	2.91173398173372	0.0100206702066824	0.0227074245178796	-4.1273723220966
ENSG00000047634	-0.208077436681916	-0.383220491094048	-0.910620850333381	-1.00776745481219	-0.420849399975732	-0.328689382917018	-0.727823889481473	-1.18669135635956	-1.00930868656559	-0.482609272204246	-1.21469058160353	-1.50766949294354	-1.40659719569534	-0.744937187230549	0.526187455102365	-0.824253762707007	2.50700517913701	0.0230851215020151	0.0460303102557382	-4.29380125266216
ENSG00000047644	4.25048410394462	3.03811888124135	3.06197385554099	3.29466014433395	3.63332503571545	3.3356905093876	3.47991099787884	3.21215917062768	3.5778929111523	3.68642553844781	3.97301836331478	4.02744876135734	4.18159775298532	3.64933363255751	-0.319453013274546	3.60014568989182	-1.7400003627557	0.100654101624536	0.157381946412156	-6.42384986311669
ENSG00000047648	-1.30969484105432	-1.67013883485718	-1.53494460870066	-1.05991721741956	-1.76355488995396	-1.32254056375226	-2.22031084946683	-1.9797889119406	-2.41622225947092	-1.49454260395653	-1.86535142538712	-2.84580059113225	-3.20510179635659	-2.30320870704688	0.76678521987664	-1.92793700717826	2.89638182029239	0.0103476178913228	0.0233197765471065	-3.52866652564231
ENSG00000047662	-0.264835238071883	-0.934964642498559	0.452498811551694	-0.187008300644972	-0.0467422552687142	-0.209537996724673	0.159051072832406	-0.247884497531048	-0.371093841142386	0.0439595070373302	-0.481027212062921	-0.620090762415596	-0.880879443462215	-1.4070992472539	0.410440127542502	-0.356832431832531	1.64257763694703	0.119570329117347	0.181820399261273	-5.7782712502785
ENSG00000047849	4.99188957631195	4.77409414811936	4.82056872984063	4.72300943747595	4.79799754643217	4.53878696209648	4.70511292588552	4.87638997533811	4.98634971143513	4.57084521344163	5.47228498768672	5.41996591107343	5.81334117986399	5.33936156977753	-0.448001702532067	4.98785699105562	-2.93745148638467	0.00949535575045775	0.0217396491419905	-4.50962411336655
ENSG00000047932	4.31945248673293	4.06157831983328	4.16461322836983	3.89971252764327	4.24242061998506	4.11257451600108	4.26220594189591	3.90659197850221	3.890912577259	4.0746755931315	3.79705354165331	3.98061937534396	2.65006774490665	4.08545228550701	0.391388183728038	3.9605664811975	2.19310956689887	0.0430925104716299	0.0775741672755816	-5.81007155555195
ENSG00000048028	5.50879700722974	5.36386992785138	5.31493040512806	5.41774505795658	5.16089331305635	5.43590459697914	5.36972809723591	5.41630377881704	5.65976647079945	5.78744323880351	5.49995833133519	5.59350313410781	5.28235592968583	5.49788369391621	-0.164817470172678	5.45064878449301	-2.04305683081794	0.0575184128316032	0.0987825649679244	-6.19687872974166
ENSG00000048052	1.08821003878392	1.05254019834611	1.55642605124893	0.651955651589626	1.63823089521879	1.21538265347501	1.53882328013862	0.976738076514994	0.453517457007899	0.98884663373218	1.61241958501793	1.22330501319307	1.76187584433091	0.44367642559955	0.172551263267461	1.15728198601411	0.809840677396896	0.429666794192325	0.521279361255462	-7.39750070390576
ENSG00000048140	4.66184584967559	4.74287439111555	4.63243462227406	4.58862180799231	4.80670658405937	4.54990281199633	4.65019941903677	4.26707340652276	4.34070379442593	4.18580296266722	4.83851355934682	4.56880389280241	4.61280441821694	4.51833487197194	0.186612666667191	4.568901599436	2.00323161369745	0.0620246957814712	0.104964206389917	-6.21343786268874
ENSG00000048162	5.14761799640309	4.66399298634852	5.24874504941735	5.21708747356923	5.062741130636	5.15155126364926	5.12436799503164	4.73654113351438	5.17007975280314	4.69043982980506	4.34639014950548	4.2743127518738	4.88711306355075	4.99027768327779	0.358495234048044	4.90794701852754	2.67416900403888	0.0164087998384396	0.0345025058410718	-4.91489109519979
ENSG00000048342	2.34716245275999	2.32905027314286	1.90630385108469	1.62239170668148	2.02738366844545	1.89065581726047	1.91814799181404	1.92173093155735	1.65202365777493	1.85923873942636	2.1249791547958	1.9175512434284	2.60188677062759	2.09585201022501	-0.0213772329073603	2.01531130493032	-0.143170717390369	0.887905837813421	0.917688684784914	-7.73402178159161
ENSG00000048392	3.74274010764827	3.32944022415806	3.564803337462	3.79839413484141	3.77186650725597	4.04546474939814	3.89531328692457	5.63991175035862	6.01927324113683	5.62363459430332	5.4594065943477	5.57560820163079	4.90191199906448	5.19133025975151	-1.75075863121357	4.61136421344869	-11.4030735483117	3.39896700685314e-09	1.57896287940494e-07	10.8568553435769
ENSG00000048405	-0.441729021015058	-0.290131257586432	-0.894743040369707	-1.03760949371633	-1.32954127895958	-1.0907481648755	-0.79363420382942	0.568010142475809	0.225790369414531	0.49458746603844	0.430958163108058	0.578165173603935	0.549549218990047	0.545217320627648	-1.32272673990409	-0.177561329006683	-8.22294970307495	3.32992856020718e-07	5.35082552874835e-06	6.70350353124947
ENSG00000048540	1.60779484832334	1.46311726770938	0.798691601982719	1.70862849465471	2.13105123871246	1.44937429204731	0.518958783821888	0.686871873934781	1.48973428074018	-2.13116172132825	2.09934229982504	1.93363527967687	-0.231808459695523	1.3998834846022	0.634481698603152	1.06600811178622	1.28119080210035	0.21800928734083	0.299254604495281	-6.90207245607161
ENSG00000048545	-0.0303354805504134	0.165867610453205	1.16560690208973	0.48784340383768	-0.198302906268326	0.805602265998138	0.358795085942966	2.60385719206293	2.43238117617177	2.22090296173224	2.54156795622544	2.3973081215845	1.76612623144889	2.64393396438165	-1.96252116355408	1.38293960607931	-9.02075740392993	9.49779852163373e-08	2.01039488359659e-06	8.03413048359631
ENSG00000048649	4.55257348636609	4.48996369859316	4.3645396031913	4.12663048730582	4.44105008317501	4.24253898594125	4.30000487145801	4.22306036217647	4.19730312709597	4.33634392893267	4.46429499739635	4.51571702262531	4.21668160483205	4.38936280960154	0.0261696777249014	4.3471475049065	0.32203326723902	0.751510297088795	0.809303324603645	-8.07115492156632
ENSG00000048707	2.12232960709733	1.93433180882414	1.5326968503211	1.60306734660684	1.51004859482209	1.49731315596563	1.71546785309491	2.04596532348611	2.17926277699131	2.05744954056833	2.3576782466986	2.59824788863289	2.91396178353018	2.81138467090879	-0.721473749861779	2.06280038911059	-4.69552507813898	0.00023022152734668	0.000978492109947763	-0.63926694991267
ENSG00000048740	1.24723551814248	1.21181665580772	1.52268734678011	1.0883479832197	1.25460553423962	0.936256372574238	1.16389196396217	2.5583298933739	2.31790516067234	2.92232172109407	2.75020619114813	2.77874851920379	3.58828272557526	2.90639201535661	-1.63443664270172	2.01764482865358	-9.32675404898028	5.98845305385305e-08	1.44614012139773e-06	8.06643018189361
ENSG00000048828	4.8918500068194	4.5374904790437	4.51559115959996	4.42137839312659	4.46544979972559	4.24075814803255	4.34534107384206	4.15102645462795	4.14145954438561	4.15681757844431	4.42383739922228	4.49747780509512	4.70848414232709	4.82900379119362	0.0726205051404376	4.45185469824899	0.582013863425335	0.568500365858932	0.653496217686915	-7.90366130586858
ENSG00000048991	4.96059902157355	4.70115043649568	4.63785022859069	4.57993760088932	4.65583305107418	4.61404786600515	4.58419172662822	4.80419944305967	4.940845098168	4.72164057741664	4.87239010226601	4.98056729128911	5.07248702964863	5.19605019573016	-0.264841551794173	4.80869926205964	-3.14560752986132	0.00612536187251502	0.0150457677800969	-4.03263023782119
ENSG00000049089	-0.288408290802017	-0.790669478574344	-0.62436640523918	0.301070467179569	-0.807798788691167	-0.541698170276207	0.136994227911283	0.731696555566404	1.2393310666775	1.72770448999159	0.843793977087846	0.655623528647022	-0.345593038816529	-0.060620540159769	-1.04950991675211	0.155504257178714	-3.28942792904985	0.00451554865098482	0.0116093668422341	-2.76868066224892
ENSG00000049130	0.230681450499193	-1.03852828508941	-0.380330223061511	-0.810116090001773	-0.379571110211932	-0.959795165966961	-0.636300990111263	2.23264913963884	2.06730404917761	2.40463546020225	1.84434754643249	1.0484585177916	1.74776130933464	1.06542070147025	-2.35258620120221	0.602615450721716	-8.57857220197337	1.88562807724798e-07	3.41517549526565e-06	7.18867944803785
ENSG00000049167	3.22074905980085	3.41411333295974	3.3899223424036	3.30484684411499	3.29832236912948	2.98029061493429	3.05389461792883	3.03617699854713	2.92484951382567	3.10467411529685	3.13081769901394	3.02084187746783	2.75021826143446	3.12609898091363	0.22631908974349	3.12541547341223	2.25849784058489	0.0379178522243074	0.0695655983451982	-5.43966296579036
ENSG00000049192	-0.790968970109271	-0.26218591809987	-0.49494291801803	-0.573066375711293	-0.593382534961342	-0.570230934616514	-0.16895695302511	-0.499493313292253	-1.19593283282421	-2.12818635467277	-0.860990546047142	-1.06661134070984	-2.61504342513028	-1.15948461534148	0.870039591108337	-0.927105502325672	3.25803753198797	0.00482680642316886	0.0122491786856523	-2.99928087917165
ENSG00000049239	1.36832879518878	1.65091790665573	1.57602205501172	1.20006638527582	1.53567228763682	2.1366522674509	1.90772876633363	1.28337491917681	0.987435249741935	0.771992401779067	1.43532489136502	2.23638118111065	0.904537323592898	2.00765549722678	0.262749068557613	1.50014928053904	1.09261523206026	0.290408629573989	0.378635611199252	-6.64663255381462
ENSG00000049245	4.57422552012128	4.91743078527031	4.75980143035873	4.81308921173612	4.94477671325277	4.54342572395659	4.72843155447693	4.26581274204419	4.23541514732204	3.97792313201788	4.48849652933102	4.42118962139344	4.39208009482541	4.48134638616853	0.427572953974281	4.5388174708768	4.0554582218421	0.000883497032600756	0.00296963335647164	-1.74285659837617
ENSG00000049246	4.35378216943648	3.46133109304863	3.67320499073048	3.23866882299318	3.79188837306662	3.17779237525627	3.46004962488191	1.5404805749232	2.06965228005496	1.80772001835289	1.68014116635705	2.70853835149634	0.858207085669767	2.03085660928995	1.78403715738402	2.70373668111127	7.4575841519415	1.19560708345223e-06	1.45955203738185e-05	5.08277993945856
ENSG00000049283	2.12107387893907	2.43848159095467	2.10953223620175	2.06860535484698	1.96477610325126	2.23760048374114	2.44064879330122	1.53801856831786	1.8054435640232	1.17585762279659	1.75011387729371	0.796232927266525	0.751936302941225	1.34828214689601	0.901888597226983	1.75332881791223	5.07979271448063	0.00010451871945032	0.000512735725284096	0.746836887611621
ENSG00000049323	3.96019738148282	4.13678251072671	3.7721464744849	3.34872980705393	3.8976433630289	3.75546406089576	3.90891359401875	3.63103542558684	3.45826158456783	3.85878679169446	4.5020940795594	4.6392491933912	4.17375086640339	3.87425806179849	-0.19110313741101	3.92266522819238	-1.10695388138342	0.284342314074233	0.372121538128762	-7.44803661469467
ENSG00000049449	4.75318984718612	4.67416785238069	4.78950177481212	4.85384772031575	4.98425238410101	4.74552910389275	4.97276501297048	5.88391827763315	5.90474462244508	6.1264425981365	5.84373157004636	6.02672677745802	6.05609072209134	5.37990306842151	-1.06629443036108	5.3567722379922	-10.4765887527881	1.15942011870723e-08	4.17494149845732e-07	9.49869503752232
ENSG00000049541	6.71108039606256	6.89299096748121	7.00280843231415	7.0749816309369	6.96014516196507	6.96930873106602	7.14176114870629	6.5640479572546	6.51584488876026	6.36785418525539	6.44881308314317	5.95920664371941	6.25916514669353	6.39630863262937	0.606779283810202	6.66173692899914	6.44552423032999	7.30530177448815e-06	6.01168545620658e-05	2.81963549539749
ENSG00000049618	4.30388029892243	4.02414210877322	3.88664535029013	3.82425737444074	3.77275500078794	3.7872259694251	3.9479275819535	3.73244889682595	3.47908893609326	3.59785085109121	3.95190595088452	4.18695599638495	4.1978341476615	4.09604717614499	0.0428943580553924	3.91349754569139	0.349542875540276	0.731145544250072	0.792975621018324	-8.07166089349358
ENSG00000049656	6.23506595678321	6.05327132937653	6.16199347968366	5.98172766871636	5.97646433594053	6.10588379853534	6.14088802850289	6.21545946022044	6.2147883822402	6.16416077587926	6.21561372631449	5.96261132641861	6.35382734117982	6.19612184480102	-0.0949625294352199	6.14127696104231	-1.36450353175025	0.190905151455478	0.268365280476394	-7.21628008734354
ENSG00000049759	4.9817821317609	4.98057720438671	5.15680234507581	5.06090266902637	4.75160996684942	4.78792703031298	5.03532906595195	5.22157414650312	5.30431473245405	5.10914512750532	5.44510755535642	5.48802830787928	5.79476623862084	5.27646870013689	-0.414379980598031	5.17102394441572	-4.04820074950098	0.00089721174188457	0.00300659804803885	-2.08579622102538
ENSG00000049860	4.68587681518668	4.43823843053958	4.71140288598468	4.77652995772564	5.10267638922894	4.91708814966063	4.80190006713957	4.77144634023711	4.90790652965587	5.14316929452819	4.62413288773273	4.80793464850711	4.54156320224169	4.62565596945747	0.000784470806487469	4.77539439770185	0.00729680402218218	0.994266378915246	0.995984864014606	-8.09157216348335
ENSG00000049883	4.83382611206472	3.92695128301595	4.39180963791333	4.53073900606701	4.29849070258675	4.15418815339759	4.35266092573295	3.18451062658135	3.08223743013073	2.97845732791924	3.2989775744738	3.24832119895536	2.82668435631417	3.52021201362054	1.19290140969813	3.75914759634097	7.88138790620739	5.83613102131718e-07	8.25948263493622e-06	5.93454763191784
ENSG00000050130	4.5304012222065	4.6000997914755	4.7858786631681	4.76245866195251	4.870291384519	4.5786094024296	4.77276618461781	4.23797807457719	4.27104963326917	4.13091540544168	4.19800581328495	4.01886148908032	4.4842188935047	4.2799207987189	0.464421772545435	4.46581824416042	5.51296785550359	4.37889531821644e-05	0.000250213778957804	1.06835469314378
ENSG00000050165	2.94554078461248	3.23521395201418	2.82696421990191	1.85926886417931	3.13258561596646	2.82439525012978	2.79469026529726	3.20084936631753	3.52626009773736	3.49174301738748	3.46537021474875	3.15738187250663	3.49682040506556	2.75168211252252	-0.493044204285706	3.05062614559909	-2.75413952980136	0.0139118590566452	0.029989592025935	-4.55929030992129
ENSG00000050327	3.20594907862529	2.78300392542454	3.18915504793972	3.19518582397013	2.3772216133561	3.15186576142101	2.67591638605443	3.5110816685335	3.68670991807095	3.63765397050003	3.26537566110061	3.05390742021587	3.38515215859725	3.10054489791982	-0.432962831459545	3.15848023798066	-2.59174300856712	0.0194298393573902	0.0398240232061714	-4.4462683357111
ENSG00000050344	6.72400791502668	6.90466413003385	7.13614511653412	7.10970956188015	6.72756001609889	6.91514378146517	6.89627840633166	6.89069302255821	6.14939942081298	5.83499461751447	6.56459258217917	6.54286357074754	5.59499813334627	6.26003755390504	0.652533843760826	6.58936341631673	4.03396801423486	0.000924735743139825	0.0030886200795548	-2.11813583996942
ENSG00000050393	4.43453479079111	5.13899123640009	4.89531757407587	5.0178205223404	5.02400057925492	4.8615860324504	4.92196860301482	5.53772191773183	5.43989233613571	5.51268581442916	5.38761561518057	5.27469876679683	5.41064772565699	5.19988871763941	-0.49879901054337	5.14695501656415	-4.69675259380431	0.000229635962912896	0.000976895947085936	-0.429787186785669
ENSG00000050405	3.52908815253051	3.53573852342626	3.32116610605653	3.51606843012754	3.19567687484314	3.33083686176341	3.46876112638497	3.77687812726446	4.20239044146085	3.5283802578132	3.9102430996386	4.48934673974392	4.54087099370284	3.73834255107024	-0.619792190603168	3.72027059184475	-4.08178592659154	0.000835498855684638	0.00284125637679177	-1.89359804641819
ENSG00000050426	3.58726548004094	3.27144294835112	3.57694002503112	3.49800391557419	3.56813187147385	3.49989208436852	3.30930437828598	4.165833047677	4.09255326463295	4.07505114832222	3.57226912851816	4.0562615471246	3.3469650772071	3.43692626922105	-0.353363577986292	3.64691715613063	-2.53257524698667	0.0219183734344238	0.0440939707554334	-5.08320963925218
ENSG00000050438	-0.837215162756364	-1.07877128449987	-1.05846322780258	-1.71212724550489	-1.05334353957989	-1.55611988817166	-1.47142710823782	-0.071234574167264	-0.15511036463463	0.476458827667009	-0.0214771390955253	0.340751115017125	0.200676287570881	0.635066923890625	-1.44987257448478	-0.525881170021775	-8.11488077461833	3.97047131414972e-07	6.1151662472148e-06	6.47277708478959
ENSG00000050555	4.53545874614254	4.17868753360598	4.66603939496102	5.17377367165311	4.65942445267191	5.07084098723563	4.82558561444949	3.67479932270731	4.09067983106281	3.8659432181702	4.63728867279828	3.43854998306159	3.39454244514959	3.08147319266737	1.00187842375787	4.23522050473834	4.94938026587033	0.000136400856365129	0.000638759069957672	0.0268111531372535
ENSG00000050748	4.76083363943093	4.68507705910515	4.35437886056956	4.65576488036828	4.45727793681433	4.37819762835731	4.37272244571876	4.9006627206431	4.8202206813044	4.69160756677258	5.03501487530568	4.78644439453409	4.95241460049057	4.99126623048441	-0.359355692332088	4.7029916799928	-3.9567481662462	0.00108963768769409	0.00354124974550727	-2.1280727836273
ENSG00000050767	-0.111045172241265	0.653665790795498	0.396964174277467	0.878395399280037	-0.126292943372684	1.47015303560612	0.470066307381138	3.48984528288796	2.92924662066357	3.80507962367794	3.68345329545078	3.39485316041789	2.77425859060455	2.66588155770239	-2.70961667091314	1.88389462308081	-9.62183300938379	3.87687653550789e-08	1.04856587363703e-06	8.98463854131882
ENSG00000050820	5.66624285263946	5.88647929512649	5.78655882761246	5.95004283980866	5.77931371734948	6.30611279135238	5.95209502774748	6.03805067169638	6.49431564959354	6.70500998383556	5.68884572636331	5.65617878082056	6.24656635892643	5.39072954624635	-0.126891583392141	5.96761014779418	-0.717619286917645	0.483124917564602	0.573893555697713	-7.85124618876832
ENSG00000051009	3.27633489472533	3.47703262972713	3.45296961422328	3.41702216019446	3.41988134164237	3.34639972515297	3.40221196864328	2.93087271823855	2.99574476138709	2.98402741803426	3.24770162504138	3.12938270933076	3.41302257455988	3.42977536219809	0.239684054290387	3.28016996450706	2.51969031509771	0.0224991245587998	0.0450167425620832	-5.04560936150632
ENSG00000051108	4.15278276578209	4.17127872691179	3.63586685391386	3.48916735290832	3.57482319703127	3.53639312450609	3.4467475252341	3.82689783950076	4.10277407650142	4.16352911265622	3.79958283238763	3.88159813509175	4.76867877990392	3.88009296472563	-0.349437537870644	3.88787237764677	-2.08932443961418	0.0526580877094114	0.0917408510608712	-5.79100942498471
ENSG00000051128	3.45256379426984	4.13551541661388	3.77785604545403	4.09470105367493	3.75445421124034	4.70455818238337	3.80134446594431	4.50698795987816	4.38885231598935	5.13897209407165	3.90953147999626	3.78645669860618	3.74035420836124	3.89917309995817	-0.220355885074544	4.07795150188869	-0.992339645720908	0.335498684089284	0.426326423475744	-7.39452035911978
ENSG00000051180	5.94941553849919	5.88404756200287	5.97760373464382	6.11212776257784	6.20945665395584	5.87000532607843	6.11010130981708	5.19379790207552	5.28184565056746	4.93632824532173	5.0068040291368	5.01486117731655	5.13728415362715	4.93522040502941	0.938051708181343	5.54420710361783	11.5588487404988	2.78675428025733e-09	1.35670345380048e-07	11.0921549663367
ENSG00000051341	3.81073037912044	3.82598265246444	3.39101021300355	3.4799872298964	3.66127132035487	3.81528774592676	3.71057794430967	3.20376356701421	3.10692186880768	3.13589650467655	3.17013860441816	3.88230697213345	3.13117118215667	3.43439132741603	0.376197309443666	3.48281696512135	3.15250307648327	0.00603665774682838	0.0148518620247924	-3.97477283560457
ENSG00000051382	4.05237250291123	4.07720103523682	3.8935609285303	3.9026856907191	3.9911199512439	3.70529293260955	3.98363584499259	3.99765067738987	3.9946088667909	3.73333939234444	3.93838735691454	4.3563903763017	3.64966730587029	3.8402755443731	0.0105683406297428	3.93687060044488	0.104844316224655	0.917775398857054	0.939307465480088	-8.07877696315769
ENSG00000051523	7.78394872342859	8.18976649473085	7.88156650400374	7.97598272363921	7.49827633801339	8.42950746869284	7.75275218602371	8.91682287638331	9.07540728146931	9.01197546256253	8.52615248963148	8.27661741802387	8.44279555741897	8.55780384897115	-0.744034399305466	8.30852681235664	-4.78485227282482	0.000191349243883231	0.00084076232754614	-0.37361714016044
ENSG00000051620	4.49270569142173	4.92183753642723	5.27176721401339	5.37849595493926	4.39630009354354	4.83645623716875	5.19240935246101	6.1012424313226	6.51076891023583	5.8969349037398	6.53977213541706	6.45600081977926	6.39524412494499	6.23893189976138	-1.37639170683029	5.61634766465542	-8.79866892019322	1.33644354336867e-07	2.61930022002256e-06	7.27410257441288
ENSG00000051825	0.0516983312783954	0.138863500830534	-0.20288635510637	0.220239257554592	0.456184661860746	0.197585630903679	-0.0342607899611758	0.650268687107702	0.545656549568576	0.916464583023746	0.985850177718333	1.49254552707432	0.730225509095094	1.27160628701803	-0.819532947718966	0.530002968426157	-5.03784095862638	0.000113840870532695	0.000550042570565078	0.508579712452008
ENSG00000052126	3.78943991714018	3.75923920516776	3.64931917639922	3.51692339522277	3.54712599781111	3.60377548840195	3.62233685194629	4.23973707721569	4.12702064084489	4.16476973503509	4.28101474681007	4.2033205976682	4.13961806974898	4.08047253241636	-0.534570781397834	3.90886524513061	-8.06875812785742	4.28200141524142e-07	6.48211930658001e-06	5.8195220327534
ENSG00000052344	6.32271765740779	6.25832027693736	6.07723375942703	6.4269826906218	6.14433524627962	6.35401463812023	6.37704397983537	7.28652437380248	7.02830280590468	7.42890092557164	7.23349250896174	6.93385168984722	6.87404808966814	6.72688988275326	-0.792492205630711	6.67661846608131	-7.57583463860742	9.76458407567458e-07	1.24444767314173e-05	4.88372843497814
ENSG00000052723	4.1520748411148	4.45073657649788	4.27181154646292	4.04012618693755	4.18257039404523	4.10645814169393	4.11724313826344	4.3700763617346	4.19746798160546	4.06454288780676	4.46109376893194	4.38656196852249	4.44765226835437	4.60210947606093	-0.171469559653836	4.27503753843088	-1.80284271841868	0.089883408738065	0.143246165739294	-6.36136064024236
ENSG00000052749	4.56900067839392	4.13241840620189	4.45338682695247	4.3656130584982	4.43756779200658	4.37604998681882	4.37403665508126	4.04263609910956	4.51298162953841	4.32455731420784	4.33556581654352	4.09598828243294	5.13952920329644	4.83606161775993	-0.0828127051065426	4.42824238334584	-0.564982436242387	0.579759645581085	0.664064594999497	-7.95372795494547
ENSG00000052795	1.51367340148353	1.05363843548823	0.839731243567256	0.55895785467214	1.31719403966882	0.668473415362567	1.05549554592807	1.24831574182598	1.16186398284807	1.438781708796	1.60673545521475	1.51859414705892	1.90151336982151	1.67672539064264	-0.511024878998586	1.25426383802704	-3.20175831605881	0.00543876638768423	0.0135757230731142	-3.43878803615211
ENSG00000052802	6.91638520249327	5.90739001434622	6.31660418498989	6.18198841513843	6.30753857930665	5.71341298708873	6.27976221982265	6.97521238462298	6.92120798652736	6.50208890932191	6.15924737446497	6.82242613879595	6.61597134436919	6.98305525225458	-0.48441354350919	6.47159221382448	-2.94066795340413	0.00943157150634732	0.021613944041377	-4.47383414954346
ENSG00000052841	3.31894025587907	3.26496716481079	3.0726089187943	3.39017604408389	3.36263765540633	3.36970224504062	3.35226786934801	3.85574389308168	3.85945393887965	4.05362801792462	3.50841884018055	3.98019696623894	3.94179664779634	3.70919813537596	-0.54182113048126	3.57426689948863	-6.26104309681799	1.03147092898961e-05	7.92552567975537e-05	2.47043735774546
ENSG00000053108	-0.170042951721169	-1.38669993716419	-0.240831553331334	-1.95200975766168	-0.449028253641142	-0.94539171138558	-0.58700569717004	-0.00154745109261389	0.418963286932297	0.487410713330762	0.715204096848495	0.0776174737158484	-0.664198241777443	0.372725474341956	-1.00198322024025	-0.308916750698274	-3.61379086674323	0.00226291498359528	0.00651109651662841	-2.26256312635708
ENSG00000053254	5.23568820719883	4.67095960443447	4.98573761892115	4.80923364215131	4.85349344984285	4.46502875962633	4.72470759098236	5.52920855705608	5.36245584852631	5.16166321316588	5.11872533504829	5.54614272569506	5.18957069403854	5.33655996686147	-0.502413081047046	5.07065537239635	-4.64205427645037	0.000257267645529092	0.00107545302357928	-0.895665755467698
ENSG00000053371	3.96596571182192	4.74461726291237	4.22163838516494	4.28818311472545	4.25201795423232	4.49537345304746	4.49801073867123	4.54154807130245	4.77608539044306	4.54812210249812	4.58083063114326	4.86101117079087	4.65011503301184	4.87677623900279	-0.331864493815663	4.52144966134058	-2.87815241459832	0.0107493136340621	0.0240540349770491	-4.27350138758219
ENSG00000053372	5.73553185271639	5.67471799234833	5.76652898205204	5.65774512785592	5.88142993471806	5.64529580455396	5.71624211287789	5.50548258737874	5.50936215749016	5.37949533966415	5.50498738191319	5.04663673433484	5.91156625559643	5.75443004538325	0.206741943027724	5.62067516492024	1.81157785095458	0.0884694033751338	0.141307232083826	-6.28029707848974
ENSG00000053438	3.96342528723768	0.575601603971931	0.742993934563232	4.69052072843906	-0.0511035337071101	0.683148199574274	1.02239963872513	-0.509920704672948	-0.715376122515418	5.20180937615485	5.46284959118686	3.70366759904081	5.50129349299543	4.78585794966379	-1.62897896457066	2.50408336004697	-1.34234448249254	0.197835961315525	0.276225936121516	-6.50710310123259
ENSG00000053501	3.72942102878327	4.14264220294694	4.27671198926605	4.17777881167752	4.09401451652946	4.19579941989326	3.9718739856741	4.21714169445564	3.64242995449553	3.74312078858708	3.58955825695989	3.68457720403724	3.54659154606776	3.48606756159097	0.375686694658778	3.89269492578319	2.83020409962805	0.0118794647346064	0.0262024221248449	-4.13424229382402
ENSG00000053524	0.398686434935771	0.417959754668436	0.56268225800583	0.199009876519912	0.550069937490037	0.349484427078307	0.528368238612665	1.80135615797031	1.93294697202127	1.66921831961706	1.61452065709051	1.84821795762393	1.73713067195497	0.95793154001741	-1.23367390003463	1.04054165740046	-8.01700154962804	4.66228053432414e-07	6.94548548142706e-06	6.2127913140491
ENSG00000053747	-1.52730010015769	-3.86382569122232	-1.88279270149767	-2.86919516057352	-3.11929427230964	-2.32882667867914	-2.17444197225093	-1.75174844283156	-1.5701446286416	-1.88893933344347	-1.35065814687443	-1.66917873370172	-0.963772469002217	-2.471488140003	-0.880483141364204	-2.10225760508492	-2.74459792844493	0.0141893481330208	0.0305112522398268	-3.88805307599551
ENSG00000053770	4.52634740693256	4.07485787596807	4.07734738878138	4.04581033670533	3.89778769356049	4.08046190421193	4.24001877632266	4.27359774186291	4.24266791772989	4.23329003776697	4.08684754614086	4.07907272482747	4.13077684007859	4.22289037632511	-0.0460900692088586	4.15798389765816	-0.510154585859009	0.616764171255316	0.695896609654997	-7.84416408131273
ENSG00000053900	3.45019557755504	3.33633264902257	3.49026132904952	3.32203911800893	3.57835404869839	3.60601965706825	3.49218231460685	3.93319472497863	3.89734931903629	3.98316070837978	3.74179773315875	3.70076860418199	3.8536619619154	3.87531436643544	-0.386785468099398	3.66147372229256	-5.28836420553984	6.8555108128071e-05	0.000362303178908707	0.589087160689919
ENSG00000053918	0.114736069188386	1.55458047449124	1.44102569133068	1.23955821175097	0.92421792446969	1.68139041843685	1.5076147238297	1.13480242333086	0.982517170654231	0.987656429649485	1.00570332830796	1.56721718446968	0.161557965675395	0.22527138296562	0.349482628916337	1.03770352846791	1.31821799610004	0.205609510077344	0.285224943901054	-6.48941542864188
ENSG00000054116	5.19009685840603	5.16973865260075	5.04769800109499	5.41511728355114	5.48369140380662	5.2462753727968	5.14894799427966	5.25693088067658	5.41079622267665	5.56670328680124	4.84133994315409	5.35306757941053	4.74251412130778	5.24610199774604	0.0396458382830502	5.22278711416492	0.32486361376022	0.749405991182777	0.807551321642125	-8.01079074774493
ENSG00000054118	7.30553614280794	7.60483629709381	7.43606596566678	7.59207978531939	7.64702676233657	7.5749360108523	7.67187016704453	7.42407136646407	7.74056905717813	7.38579193654328	7.30277481512147	7.13306281530645	7.1882893625038	7.18481293503249	0.2103354867215	7.44226595851936	2.20374112100669	0.0422089345507065	0.0762882302371027	-5.83019205895242
ENSG00000054148	5.41652036853306	5.44607113444003	5.73849794785844	6.02293565581683	5.79856722638085	6.22256886930017	5.974730516851	6.04038324129486	6.07623425040645	6.43090054093478	5.53895061016138	5.67907513771294	5.76088364480602	5.70788831646278	-0.0863392493345678	5.84672910435426	-0.563284096090981	0.580888648135078	0.665035813794754	-7.70632841651404
ENSG00000054179	2.54785129601879	2.61427583093847	3.62381061613252	2.70200490464802	2.96442657783032	3.33804877588987	3.52104166728278	3.15422924865042	3.23634406876174	3.15680182112981	2.21109317809959	2.15813783941531	1.72770230676328	1.41429995590795	0.604330182595957	2.74071914910492	2.02087611962843	0.0599901414337009	0.102188944911067	-5.39835716099864
ENSG00000054219	-3.29960807239962	-4.66453706967494	-4.21115071190818	-7.74639078429424	-7.80392803037102	-2.43994863891762	-4.06287049990531	-1.64788392681258	-1.52218647562486	-1.24874879049184	-1.78623231019626	-1.3297965155154	-2.5079891509	-2.02724472633246	-3.10037726827818	-3.30703683595317	-5.03540819095572	0.000114406977329376	0.000552120270053862	1.1264893739403
ENSG00000054267	3.33410003984921	3.13229958197004	3.10408783439227	3.09320354254871	3.22343038344487	3.10785856592915	3.30817298263021	2.71423768908164	3.0437882018631	3.18316246596308	3.19847746626116	3.06709782206918	3.06167930284102	3.03683209920087	0.14601138230872	3.11488771271747	1.77363914606058	0.0947560670436518	0.149717784238386	-6.53461802685205
ENSG00000054277	3.63047777137574	3.2789524297352	2.80927030472797	2.55530712611544	3.1732322195483	2.85109064775327	2.81662065689387	4.37393057304193	4.7443845933752	4.16373805791912	4.65165983848328	4.74273228251863	3.2546636606764	3.97510160587154	-1.24941835464096	3.64436869771685	-5.21818199962834	7.89623979677124e-05	0.000407057918433482	0.682915784007253
ENSG00000054282	1.51356532440265	1.72124582838928	1.6646700525448	1.72797138083896	1.64163017460621	1.58959171583546	1.87766800141646	2.48600770399329	2.55362006914898	2.94132024734559	1.90039705668462	2.06677174959524	2.01501083054972	2.16063019035438	-0.627496541498922	1.99000716612183	-3.93803327700596	0.00113388570985523	0.00365088492315689	-1.79458096444959
ENSG00000054392	-0.144103920136755	-1.06694774670232	-0.627744827734886	-0.32643466438698	1.80571966317756	-1.19380003042126	0.184114180191138	-2.98148900490553	-1.74793304324579	-1.35028610419943	-3.62155845677446	-3.40166395147619	0.147990896731684	-2.77937271474979	1.99588183186789	-1.22167926604522	3.50507174021639	0.00285334979068444	0.00788379575537352	-2.23075500427267
ENSG00000054523	4.58083562767484	4.43003703673903	4.24315607635943	4.06033148336613	4.16890734334907	4.00714316177898	4.21483445078387	3.53938925810596	3.37796546878549	3.02326278902114	4.16873387400809	4.58010097644255	4.28522471909184	4.33580342948348	0.34147249811164	4.07255183535642	1.66639129416288	0.114684347618843	0.175691273077605	-6.8059219711914
ENSG00000054611	3.75292869486486	4.19883445271818	4.1015660050782	3.99794979470388	3.89811916955433	3.88806168352218	3.76820675674959	3.38985683113873	3.21106623367942	3.11220752600842	3.6377115148681	3.45644090347719	3.71789463904432	3.50696844748291	0.50979516780506	3.68841518949216	4.35345653840533	0.000470584418091181	0.00176556194592718	-1.04554212844701
ENSG00000054654	2.96143897636799	3.05478186947569	2.96897053389597	2.4549917338369	2.80177793351297	2.88928165509546	3.0619957515615	2.79818958245142	2.58014370173262	2.80780848779056	3.05375780534608	3.23103524362708	2.4788224167333	2.76645370256683	0.0699901624328514	2.85067495671388	0.589694629486625	0.563460345019353	0.648839371191378	-7.97220348789339
ENSG00000054690	3.8241249251037	3.88160019532854	3.46318770246776	3.37041357492251	3.15902275862154	3.50416553759337	3.70674297164969	3.57062946388794	3.23224136266258	3.50762566247928	3.6173970725594	3.55763259058605	3.98514558473839	3.67134673053142	-0.0318441470450743	3.57509115236658	-0.253112916035302	0.803337462844214	0.851617477595761	-7.93002904522135
ENSG00000054793	2.55698097942773	1.89790797220801	2.19573113210863	1.59094135266459	2.24322279446952	1.34052349939655	2.23547184427385	0.628864648577317	0.436311513972995	0.213989430617437	1.8911304734416	1.85223194868123	2.62921867645672	2.31076639650103	0.574799246556735	1.71594947591409	1.65490467682277	0.117019280673406	0.17856590585206	-6.23198710147408
ENSG00000054965	2.86966980643461	3.19186989373889	3.03432745300372	3.05324459075091	3.13131327973582	2.90749529359415	2.90437404594925	3.37325302617453	3.26311875908518	3.08899659425613	3.5588680350757	3.57512197607913	3.3957831461051	3.27770986445768	-0.35118350093347	3.18751041174577	-3.9415357749321	0.0011254690503872	0.00362767050112887	-2.23152731659746
ENSG00000054967	2.18250422589112	1.24019424726878	1.19806188413363	1.45659603292378	1.78599874918306	1.57963022773021	1.58911902375265	1.43592683214805	1.22570670501873	1.99180777429483	1.55186324607433	0.963463311861472	2.03263531711304	1.84134099203536	-0.000329995986851905	1.57677489781636	-0.00163558050281288	0.998714795861175	0.99912356486902	-7.37821258469015
ENSG00000054983	1.21420116061403	2.17729690649727	1.70841733784529	1.71246072095756	1.59467031797158	1.46603289522007	1.68822757216577	2.27566298717246	2.20524018052268	1.82647336764911	2.81553549653369	2.68124244267375	2.37007651715976	2.78145020160398	-0.765244742431614	2.03692772175621	-4.42570967569613	0.000404297198763218	0.00155276150399089	-0.849344070461764
ENSG00000055044	6.49570177660542	6.52813990478916	6.72280655736915	6.75224274431487	6.84328475218633	6.69659882708447	6.66403457147083	6.65142260257287	6.46143081194902	6.50021645330305	6.3359678695804	6.27239383088591	6.30905757337963	6.10062375207805	0.294393963555402	6.5238515733978	3.44805902928841	0.00322198497148217	0.00876307912578984	-3.43157668471811
ENSG00000055070	5.28327889790777	4.99851455362135	5.02375788764573	5.13649552730768	4.83752884832655	4.85322173898283	4.8828705218021	4.17703463978124	4.11595975535465	3.86077227259526	4.63153569819927	4.29728842649466	4.76480287250233	4.57009184399684	0.655622699376048	4.67379667746559	4.77123798862227	0.000196809440612183	0.000858384173518789	-0.162862038773016
ENSG00000055118	0.767721805114403	1.48661754530116	1.05148554032897	1.3520710375679	0.555152270462144	1.46217017530728	0.583672670079715	1.8256170459661	2.27880779380705	2.11544415801695	1.39070147647787	1.73539669835322	0.506278653861788	1.26698487822131	-0.533455203468332	1.31272298206185	-2.04342126068	0.0574785859572721	0.0987537930104402	-5.5344591117433
ENSG00000055130	6.15327902583406	6.00225966830912	6.04836947257561	5.98961085488528	5.98925958527566	5.91843844113247	5.95529858613816	6.08175761854291	5.90715192133247	6.15923343085108	6.02853454270689	6.1187433347594	6.17003187616998	6.00275371259303	-0.059688046947775	6.03748014793615	-0.94259625870581	0.35961454445967	0.451829113308418	-7.68696054193985
ENSG00000055147	2.38519120068233	2.47721213976508	2.4236580035651	2.22875823707131	2.61948339263873	2.23475372235192	2.32967608615825	1.6167992152887	1.63285084210025	1.73782765800356	1.62164897730818	1.94198595232281	1.83697384803533	1.98366453539991	0.615589028803891	2.0764631293351	6.23489862245432	1.08355826058244e-05	8.23734390352836e-05	2.75308144705397
ENSG00000055163	3.59713915863866	4.03926735586507	3.71929185805257	4.13568550170307	3.78612901239333	3.99905659620807	3.59984561864823	4.25361628786726	4.00175221654088	4.29716413422806	4.29357788029732	4.23097155090487	4.2777568846129	4.32978578902144	-0.399953174868902	4.04007427464155	-4.29997002113795	0.000526691942894348	0.00194018390949368	-1.59109153315372
ENSG00000055208	5.13351659957333	5.20690149420845	5.09414594192678	4.92337489865297	5.0665965250567	4.80001198857949	5.05782289097222	5.04649976894543	5.1585867893167	5.04357122998401	5.25279395873107	5.16222516959048	5.17601048516574	4.96344806594737	-0.0749684306623495	5.07753612904648	-1.01583670601245	0.324511738741647	0.415138992245594	-7.62204553340541
ENSG00000055211	4.39980390653104	4.69743973491202	4.7560855915307	4.74686665458101	4.5779724180474	4.48286621983699	4.92091129543681	4.48752449620541	4.83043736076782	4.73786047904112	4.65685885898662	4.74379071281419	4.44704505772746	4.52850648708096	0.0227133666996746	4.64385494810711	0.233770193148318	0.818066678094986	0.863021801275009	-7.90617994344025
ENSG00000055332	3.66295905259055	3.57841749730309	3.5087876516799	3.41527790730898	3.34800292146685	2.87787888724839	3.49999576093075	3.66318772203511	3.66164741409022	3.62591426844327	3.85100925070132	4.04619494678862	4.06434926952252	4.02296581135824	-0.442128739164809	3.6304705972477	-3.34846987276129	0.00398292439670652	0.0104362268348115	-3.18092178134517
ENSG00000055483	4.88139851435341	4.40738765376225	4.52694531777343	4.3686049699438	4.53553741323532	4.58434430102113	4.62113945175746	4.4143528098273	4.33812467728735	4.38034159166876	4.53332835759288	4.33116913312238	5.00087944819894	4.70661574085199	0.0307584318393745	4.54501209859974	0.276981792669083	0.785267011114214	0.836468124651768	-8.03796859872148
ENSG00000055609	2.69944360715662	2.42048971239316	2.08573881510593	1.69254514108798	2.22117986341651	2.15475129067549	2.25115747790328	2.37962419176013	2.15446591142642	2.12589882811916	2.12095445701878	2.73949375215683	2.53747511780852	2.36800354754775	-0.132922399891069	2.28223012239833	-0.972421140990253	0.345015474563329	0.436414814062594	-7.5384502726842
ENSG00000055732	-4.42620423177463	-5.21058870979923	-5.73644274858263	-4.83480725881216	-3.12521720677664	-3.73717555272453	-5.79361417041852	-0.26594803723463	-0.710072931267504	0.649002503138534	-1.50995430103685	-1.74376848425378	-0.142001171595213	-0.937371581070943	-4.03073102893143	-2.68029742015777	-7.72075477987969	7.6379621985108e-07	1.02157021504586e-05	6.13605009989589
ENSG00000055917	5.44702151986269	5.22714755255672	5.16175744694009	4.99736173656497	5.22230113649462	5.01002356241995	5.24467170486908	5.35372064749855	5.22605286611224	5.18525136132349	5.46277756946673	5.47798030253932	5.25788667392376	5.45963002126287	-0.159142196191007	5.26668457870251	-1.98926634051854	0.0636790256401715	0.107182605596256	-6.29835487249943
ENSG00000056097	5.84833416950195	5.30255429457364	5.35388678186857	5.28255665164256	5.3294959929314	5.20327510560634	5.30219564339584	5.42660243235419	5.52557597044087	5.42204018970923	5.43674858922567	5.72019472995419	5.61004397476044	5.73759103754815	-0.179994341047531	5.46436396882236	-1.88607570731982	0.0771864964625665	0.126081982075681	-6.46388502629909
ENSG00000056277	3.27882340910052	3.21724746571717	2.71219600446894	3.15767017486105	3.24381010404213	2.79235191940188	2.90787876074839	3.56908554826907	3.10613969836203	3.67973392624202	3.11134002824944	3.34329063242013	2.6649860829303	3.04711484897145	-0.178108028666262	3.13083347169889	-1.08329848159075	0.294401050995979	0.382938462292621	-6.95921070706426
ENSG00000056487	3.57156989273229	4.0073228587734	3.66391490232036	3.85527848849599	3.43973833431984	4.12760677687422	4.0459088270764	3.18963319947771	2.95216644770627	3.43592973661039	3.51462266787203	3.56090342101215	2.81420626286502	2.99255822094909	0.621067676629892	3.51224000264894	4.10839204847479	0.000789669816588581	0.00270581963336138	-1.54755087127899
ENSG00000056586	3.17707876485936	3.57122417225656	3.23707650530143	3.16790257793581	3.44634781378713	3.01982672261325	3.27622540779555	3.13896932729562	3.0020017707152	2.93191600956791	3.53031304344693	3.6058414290844	3.45099486914863	3.32563749563563	-0.015140664687963	3.27723970781739	-0.128959929473647	0.898963185410437	0.925971642656603	-8.07011590328965
ENSG00000056661	4.97051441605997	5.07350899724053	4.88918225519844	5.09125393784659	4.97274391524108	5.14449556478365	4.84318103676028	4.90655902928268	4.86642441601763	4.92198097383612	4.71006658219226	4.60924269345367	4.63666205143954	4.66704671338836	0.239582072087373	4.8787758987672	3.01377415470492	0.00808945242016152	0.0190112831010106	-4.20211369278844
ENSG00000056736	2.49202902696796	2.22053798888227	1.99657923672965	2.16420570822572	2.24704855800683	2.54579446568307	2.51579211126094	2.24128147156389	2.25738233499564	2.21888733527879	1.99447228207899	2.35442868652794	2.02051996287393	1.76037206650883	0.188167715406195	2.21638080254175	1.48558695369338	0.156423810982376	0.227133643935397	-6.52636372862708
ENSG00000056972	2.92848458753163	3.15470177426076	2.82828582015575	3.0189025944437	2.68654261027979	3.00123149418325	2.92874028830023	3.89856245487067	4.45865427611068	3.63834011627904	3.70753355131237	3.84550459915973	2.77897217980914	3.69925980195368	-0.773483869324888	3.32669401061789	-3.96989770681799	0.00105959322140901	0.00345838270253932	-2.02749569460047
ENSG00000056998	5.19224571737066	5.14633984359925	5.34600641026797	4.50627994969378	4.97359979998265	5.12765847023447	4.92728542815	5.33742568399516	4.12530449177895	5.52679936155268	5.02650564745202	5.67963187050171	4.79593818387833	5.35058809839835	-0.0841160500513611	5.075829211204	-0.411501488590893	0.686051199636035	0.755103015985728	-7.79475502659996
ENSG00000057019	4.93987258535376	4.51464908213553	4.33345897700619	3.98000168749462	4.27912024266155	3.92060052968795	4.21202993584099	4.14512757808015	3.9214064202249	3.91232540034765	4.4814472814754	4.57043229049921	4.91396766088181	4.87273536334025	-0.0932249015690783	4.35694107393071	-0.506464724327666	0.619294847608398	0.698040154680664	-7.94323724734319
ENSG00000057252	2.27585459946716	1.77215908556101	0.983597882070813	1.68728958489252	1.87807649903688	1.10052263386872	1.26000153022903	0.532560999891821	0.0250984432990413	0.466842239073843	0.783602863750068	0.874908518523703	1.36223378659141	1.1219612491564	0.815481648635075	1.15176499395803	3.4174439698836	0.00343910038407905	0.00921560783237035	-2.70822616086044
ENSG00000057294	2.40037999659057	2.00894906901505	2.92178767555738	2.87804191764254	3.13573589493379	3.04386631666581	2.85657609776627	3.0588086987487	3.58052160865694	3.05314993513618	3.40921481595996	3.26043889635016	4.56024428480642	3.27982303519659	-0.720968813994229	3.1033955887876	-2.98981606152954	0.00850733795348706	0.019828190392932	-3.7904592010783
ENSG00000057608	7.90596025096643	8.12294298934072	8.11004797715623	8.21048825231634	8.19900179752421	8.15354002267684	8.11714420305109	8.46015289464011	8.35337200738308	8.28129707729835	8.3754670870369	8.36601566869969	8.07492995097962	8.324556109644	-0.20234465874036	8.21820830633669	-2.93723815167899	0.00949960111102355	0.0217446860853254	-4.55056957479291
ENSG00000057663	4.42238560032299	4.31879752110552	4.46913872382651	4.47585988461781	4.46628077495093	4.3451819637727	4.40300506999595	4.88575241171937	4.68322689792213	4.90569809087284	4.59784201343015	4.63402097067206	4.49366977733548	4.4517393416041	-0.252984129155939	4.53947136015347	-3.06598571654153	0.00724707442044373	0.0173514606538788	-4.1159346398421
ENSG00000057704	0.244925813754709	-0.425541454146851	0.229321058844845	-0.0329364089208037	0.267904139069161	0.0453170190732748	0.562510438241733	0.293968995998826	0.162285999968359	0.393137384106604	0.18332981959724	0.126000045782904	-0.0837313924077332	-0.501527232533891	0.0372462904732386	0.104640301887741	0.213017130547603	0.833948216464043	0.875074035915499	-7.35025267816302
ENSG00000057757	5.92687104150382	6.08475977474579	6.10877361223232	6.12318827679365	6.14995323376065	6.19742292584843	6.19208311112399	6.20220061344101	6.15394570421357	6.17750159683055	5.83256745739761	5.63783785509831	5.88829368218554	5.84551770614467	0.148773322953724	6.03720832795142	1.61857388202672	0.124674658297569	0.188264921357285	-6.82883645491831
ENSG00000057935	5.76224868690041	5.5177659354741	5.9358047524103	5.73367600326309	5.87177090423102	6.03250430560029	6.00931882565563	5.6369062661209	5.20119495745787	5.71746861895458	5.38997771920376	5.64052337432364	5.18102641939965	5.39037651503818	0.38656912642685	5.64432594885953	3.71725341380904	0.00181482363601427	0.00540054241416373	-2.85889411593311
ENSG00000058056	3.69495810498154	3.44171554354637	3.27208857892018	2.70427267696662	3.19288561605358	2.66187712504834	3.27263292769073	3.28057771502373	2.66303296939663	2.59972789300263	3.70537733870882	4.22336542722288	3.87920874883474	3.84349385911302	-0.28951915773017	3.31680103746499	-1.15796595674131	0.263521854768466	0.349686490883886	-7.18521563304513
ENSG00000058063	2.67892228992809	2.74244378760606	2.29066912725369	2.34767153986083	2.28420848285347	2.28402062263322	2.47622169440706	2.87255422573402	2.92013989555307	3.03178106918645	3.21302398443271	3.40324580564258	2.91030179207598	3.18022580097297	-0.628076653153306	2.75967357986716	-5.74219566926569	2.7896127673121e-05	0.000173723716123758	1.60483048393167
ENSG00000058085	2.58283238152117	1.93537142221482	2.2470351145199	1.82021623001451	2.02328781124034	1.73730975471818	1.88880109012166	2.72616353573997	3.21388901646813	3.131163983369	3.30255817008932	2.75529272027765	4.83980538416903	2.74193466634216	-1.22305616997043	2.63897580577185	-4.07329439544148	0.000850684690840964	0.0028790936311336	-1.79153707494172
ENSG00000058091	4.12423273858961	3.74998745726912	4.53902689211211	4.30924851633092	4.4356497494495	3.0634252809769	4.60355938594889	3.41853500681932	3.31503233990535	2.26990563527175	4.48650734332878	4.0338814658054	4.00744865542845	3.82529288236762	0.475087838615194	3.87012381068598	1.60435377624682	0.127785313501784	0.192222846450404	-6.59472933103966
ENSG00000058262	6.91913780870373	6.71195443252253	6.75187741097258	6.72174856656533	6.57467164684267	6.63992425447388	6.76546351834989	6.7056588112126	6.8046667057821	6.83584331303121	6.72001595927099	6.42312383719856	7.33588111969636	6.82458163993497	-0.0812088329972331	6.7667535017541	-0.76199343524674	0.456921216679773	0.548494735990682	-7.89976021626335
ENSG00000058272	4.31565026102174	4.11255004836504	3.98721655957206	3.85191687943937	4.0115017327877	3.93942397483457	4.01112037331276	4.60439198001812	4.64103889417201	4.6030778546836	4.57029481206232	4.73954195047995	4.66730027229984	4.51686879015795	-0.588059044460316	4.32656388451479	-8.17934788812333	3.5742550821351e-07	5.64964397463199e-06	5.92743243706459
ENSG00000058453	4.90394868873318	5.29895325667552	5.26323446617716	5.23062154163606	5.25503983278166	5.52802112765928	5.03814995562205	4.97031697447805	5.13865202454252	5.26544851907006	4.51704047631817	4.77109621723453	4.63461335060071	5.15044171933723	0.301493651478672	5.06896986791901	2.39621611645226	0.0288541215583647	0.0553219145379421	-5.3828745456658
ENSG00000058600	5.94857139132474	5.68553564057307	5.6887395308958	5.60348357821416	5.74297744102979	5.73592196239799	5.68911526627768	5.84958132259297	5.85413416151782	5.70428137245315	5.84214049544271	5.84234448732924	6.19295763539852	6.06069928190853	-0.179841897391431	5.8171773976683	-2.18260561106523	0.0439822283192198	0.0789306548028935	-5.88478674541304
ENSG00000058668	2.86929699396382	3.31005999370859	2.34353844562734	2.73750591295741	2.57524228096046	2.42751701059817	2.38426604858273	2.31894681655255	2.81659521842158	2.83104154560449	2.75154841329499	3.17740193499806	2.32180599737247	2.65838684254255	-0.0265935596843576	2.68022524679894	-0.165282010546236	0.870749351729459	0.904411193027756	-7.9911480081028
ENSG00000058673	4.19827484767661	4.44749639153565	3.97859750608414	4.00287769193349	3.7350411612396	3.89106323549007	4.09526706635607	4.43369390024339	4.28695954023091	4.19365393995616	4.59964439647616	4.64673203205122	4.58749354556129	4.52972302004017	-0.417125690642415	4.25903701963392	-3.75338118818007	0.0016802693502071	0.00506452656299422	-2.52987521915161
ENSG00000058729	4.56822735557558	4.22817441440166	4.78806583564151	4.5799760692185	4.4692351870344	4.42829427975951	4.56297032892524	3.97223943831445	4.04097163363338	4.09519299500351	3.78079337488114	3.82228513131743	3.94081068724496	4.07579429732877	0.556015069015309	4.23950221630572	6.3768556623554	8.30173175746509e-06	6.63865816163651e-05	2.74162103348967
ENSG00000058799	4.14559595815966	4.24014828878723	4.26847555480369	4.33054762339266	4.30042328525364	4.20154150675532	4.32968684315439	4.54783104649397	4.3636453542398	4.68289091991121	4.57126300113487	4.30692738785201	4.81649524713608	4.5565810109425	-0.291746531326513	4.40443235914407	-3.30314757278174	0.00438581931761612	0.0113188733915831	-3.49936860840159
ENSG00000058804	5.32481424528392	5.28946091069863	5.43808069933886	5.49973281392829	5.64363076606116	5.41218696768534	5.47788327002312	5.63735779155983	5.34879430970276	5.5850630900257	5.54461470823058	5.65534129457512	5.6784843270876	5.83414594173023	-0.172914519278101	5.52639936685223	-2.17598893935536	0.0445513492221596	0.0797169172865193	-5.91733107534784
ENSG00000059122	2.97475757582993	2.74252309956642	2.24217912291579	2.37813761702856	2.8784539573334	2.43142454670778	1.72850955569982	3.06562009934117	2.90923953868151	3.08128956699634	3.36408124829887	3.32716665167171	3.5875759929357	4.0633078249966	-0.856305179342991	2.9124475998574	-3.84568823952636	0.00138020585572005	0.00429299398670298	-1.70724678758934
ENSG00000059145	1.38214680026578	1.36862239439261	0.55999361582815	1.20089063403562	1.2934512313109	1.1507964297063	1.28561644525051	1.44768986315386	1.36021612061799	1.50327541453587	2.14644728481274	1.55393546092741	1.90914522223981	1.6734278725031	-0.475349338484702	1.41683248497005	-2.75517409081521	0.0138820881771309	0.0299360197030227	-4.02226061960804
ENSG00000059378	0.163145735393861	-0.529092970697274	-0.238032608600756	0.0644074251444615	0.978152992406062	-0.0814156370919843	-0.190187152914604	1.65181902741828	1.49107697116785	2.22736683312553	1.20115657863713	1.63064402680428	1.08542710256279	0.803001333432943	-1.43388411948288	0.732676404056327	-5.97326526157866	1.78310120252426e-05	0.000122059194240285	2.52477119565355
ENSG00000059573	6.45837112863039	6.17802978019309	6.37692786096662	6.47996910132867	6.47831018614046	6.47332273042622	6.5164314059817	6.77971482767867	6.8917064426194	6.6605761440443	6.72144688988167	6.71258122672722	6.77639946451667	6.70130020424168	-0.326725703764073	6.58607767095548	-4.98575909830595	0.000126613871936975	0.000599851084213672	-0.176932643788307
ENSG00000059588	4.18105207714536	4.05749257332961	3.84853473314784	3.83362483963515	3.87537489733988	3.66519215745867	3.94323647756399	3.57866612303529	3.47493644330895	4.11039360418856	3.58525348892205	4.19597875304481	3.6603418675655	3.98800843396857	0.116560400460079	3.85700617640387	0.953269357599416	0.354342004367059	0.446079492671854	-7.56458332070145
ENSG00000059691	2.84454298958636	2.45202416239937	2.81831913541805	2.74962144243541	2.69237881666237	2.35420474057525	2.84872591090442	2.3764594313604	2.22379790106442	2.42614579188567	2.44747300444454	2.40097755524445	2.61979733419932	2.50710483031988	0.244675935417518	2.55439807474999	2.41806829561476	0.0276182310011048	0.053266757627211	-5.22995915713141
ENSG00000059728	-0.60727489026508	-0.217828091512948	-1.0051143254352	-0.939160177370603	-0.84404180718118	-1.49312728389521	-1.36247009445758	-0.0124973061447071	-0.990602783280218	-0.262109182965832	-0.759226890732342	-1.15388873066686	0.189781889369884	-1.1237466729519	-0.359503587031121	-0.75580759624927	-1.35887846918544	0.192645773924789	0.270655859914418	-6.32283339203734
ENSG00000059758	2.66715978052235	2.42064361809825	2.20093384757789	2.07919296118849	2.3353392558758	2.00370504186945	2.28612633388434	2.78720333784554	2.73769993877563	2.83264001411613	2.76310472246968	2.7171337788147	2.71791465325074	2.68984811912261	-0.467572052699293	2.51704610024369	-4.84732669246458	0.000168212947800744	0.000757144891894546	-0.167895310791319
ENSG00000059769	3.33633287819089	3.37433551258471	3.54784358212053	3.43183264181716	3.4097983714852	3.48738971975602	3.67635680686903	3.53513405647804	3.64417850722228	3.70560075915615	3.08500215160063	3.05733722369341	3.17637248883402	3.01041334398004	0.14760060218811	3.39128057455629	1.18738740642506	0.252047875156743	0.33699601104391	-7.08864627490106
ENSG00000059804	8.10817894460529	8.26812476096191	8.08501731132698	7.79104764368518	8.04846621524166	7.54475760241858	7.087427538964	7.24191687847936	7.04215964298241	7.03879150240188	7.55576769554206	7.99512606178158	7.94213848059867	7.46473073680181	0.376971251660683	7.65811792969938	1.97724232956752	0.0651351959566151	0.109195657023135	-6.32313092367487
ENSG00000059915	0.0100575110816647	-0.438610377231049	-0.597717500175938	-0.257064280533537	-0.491062858672125	0.776074620405534	-0.168492686188014	1.00299852673021	0.920523564609205	1.11417357092936	0.108837308439442	0.734855041195335	-0.595486867987399	-0.0218482300836298	-0.620003364547522	0.14980266732279	-2.13594622513493	0.0481427726335366	0.0852532643274806	-5.22337232848175
ENSG00000060069	4.96004315698808	4.94757344858707	5.04828690355507	4.97795018536412	5.01523551752973	4.8448580514475	4.96533076886455	4.41364533401829	4.52657054436718	4.30010321434215	4.79899494148263	4.13197572017659	4.96709901118302	4.79719108106377	0.404795413604321	4.76391841992641	3.4439313892927	0.00325044312328493	0.00881258358520135	-3.17558104060134
ENSG00000060138	4.94982176253202	4.84077986410958	4.90575649506752	4.93824108601485	5.09988488142989	5.13330272434794	5.19169287608015	5.73968789925945	5.77254479601956	5.7892596689541	5.55754317761572	5.62617579174814	5.55422944971092	5.34790889002028	-0.618952728264884	5.3176306687793	-7.49497854047482	1.12122802129874e-06	1.38402294596622e-05	4.73302482197179
ENSG00000060140	0.221064029435686	0.649495675009094	0.34299187483716	0.59188759207364	0.382068891757102	-0.25977313566451	0.522193775581963	0.398298896316636	0.169136092724167	-0.157366433236912	0.72514931817554	-0.331816972675135	-0.184759095018241	-0.546566320908025	0.331512262059883	0.180143156314869	1.54968136255638	0.140365627223912	0.207534441874433	-6.04146998952152
ENSG00000060237	5.73645404088456	5.26088552665912	4.84248853439617	4.92971139624248	5.01450816544312	4.85725288908807	4.92930842093461	5.19637092656949	4.97871472109497	5.25841394293584	5.48014291047543	5.76009744455946	5.28344636879239	5.32879077401603	-0.245123824090504	5.20404186157798	-1.76901154483622	0.0955490779491594	0.150716411057441	-6.69157211569425
ENSG00000060339	5.9967258529527	5.49569483071049	5.66099883892371	5.71401905541634	5.76900081167254	5.68894395342388	5.63433423875276	5.87380743162839	5.81832468251813	5.99351160029057	5.82547203591918	5.60622025975028	6.48385670673357	6.18867023665285	-0.262216459541027	5.83925575252467	-2.24695634333736	0.038787151216225	0.070924028872351	-5.84912709684482
ENSG00000060491	4.69709690189209	4.20006042446047	4.58562332466148	4.86846470670333	4.70733930990482	4.89723798979037	5.01410658394011	4.75848676102066	5.37359967150457	5.32217911810065	4.70161473151265	4.63323059068554	4.94527008905761	4.75101167519173	-0.215475656071927	4.81823727703044	-1.47700735252503	0.158684925753528	0.229759009201307	-6.82298592319295
ENSG00000060642	1.919759628219	1.41190082230926	1.70324021126707	2.312058770398	1.27898597644951	1.73369209759579	1.99518853498205	2.44277328284721	2.26408773953896	2.63644615263571	2.07316804118935	2.65140292464268	1.75097415396263	2.04623265893337	-0.503395689388976	2.01570792821218	-2.74104188537321	0.0142941231030223	0.0306940318078484	-4.23309156513616
ENSG00000060656	4.2687420079187	4.07295488967451	4.62515509228032	4.56335038471053	4.61288320814408	4.7697008018967	4.80383095699742	4.46985057597569	4.19282643615851	4.85811137505304	4.83955534288455	4.7732948883406	4.30559536985523	4.28435216124617	0.00107387589582597	4.53144310650972	0.00785384671584204	0.993828679820088	0.995792283040281	-8.1100685413986
ENSG00000060688	5.81270296671382	5.8792705420816	5.746145589424	5.88340587583857	5.65023703978859	5.70755228000474	5.56249312070149	6.17395037838603	6.2041090279009	6.01470805308827	6.18998714171033	6.15141755955281	6.26121825235776	6.25746444939424	-0.430038742233227	5.96390444835308	-6.21035321776241	1.13494733906433e-05	8.53402078492522e-05	2.37437470143649
ENSG00000060718	0.837688646953465	1.60850724757383	2.10587566926857	1.43934367285594	1.67838069457029	1.85971265853797	1.62346548915247	2.3321625646523	2.61356157879868	3.08132363816414	3.22646656971629	2.79750705164104	4.965355283672	1.42772544981622	-1.33818897647209	2.2569340153838	-3.14393184862356	0.00614711057572561	0.0150930971993457	-3.76845171988425
ENSG00000060749	5.18783447561255	4.45138668378615	4.49000184711591	3.95470200804601	4.45352668123506	4.21162083252699	4.49312934187433	4.70143402563635	4.37286276622615	4.5718063278762	4.92841741726489	5.32826319926275	5.1849374053387	5.28791019274553	-0.448234803744276	4.68698808603911	-2.51198069215421	0.0228535692311515	0.0456358968190886	-5.34613797504828
ENSG00000060762	2.56174966542274	2.41308672145848	2.75752731997607	2.33885037070686	2.70084383728895	2.85895430322246	2.52623812418316	3.32331311071811	3.10206387147852	2.97955148482152	2.93764865140494	2.39901984814143	3.61392228307435	3.2804319204217	-0.499633345228249	2.84237153659423	-2.89395333503048	0.0104002768850949	0.0234063923758301	-3.95742296007187
ENSG00000060971	2.84098449239454	2.65141306023177	3.10493555417845	2.75071153097775	2.4989583494548	2.88083492314958	2.85566593816024	2.72793981770468	2.94242941389389	2.85087438341734	2.6926761972591	2.2734296949307	2.84471657379766	2.72647215891936	0.0801226801421762	2.76014586346213	0.708949894876819	0.488346918879619	0.579248645325391	-7.64939270140092
ENSG00000060982	6.37843428842476	6.29364980905012	6.29082583315861	6.10289844670625	6.34126255300234	6.06265359558448	6.04872881917061	6.1065336557724	5.9202991547668	6.04001277017505	6.79099626848241	6.66412979095544	7.02148692596061	6.39163958421633	-0.203174382468411	6.31811082110187	-1.34717533191671	0.196308058250232	0.27465977433769	-7.32098905855839
ENSG00000061273	5.5762848258691	5.74974315890764	5.43860493428211	5.61330885439665	5.55129480546096	5.78981907613098	5.42610279883824	5.65988065305997	5.62432084293136	6.12502198019725	5.552581878792	5.44533059192734	5.79746303858783	5.38629377742297	-0.0627852227836172	5.62400365834317	-0.599504756625529	0.55705750324019	0.643380800145791	-7.95770341729421
ENSG00000061337	1.72182256421856	0.218602705497175	0.60232816156843	0.389735946718094	1.08134951414045	-0.467991242435505	0.438775421177583	0.808053842126025	0.480167841520733	-0.0535355863078067	0.922754291341512	1.72576228181466	1.92965441284237	1.40356305613665	-0.496361410040918	0.800074515025638	-1.40440921762065	0.178917786653367	0.254126313613973	-6.0996527205934
ENSG00000061656	-0.0628443391539637	0.860769759401979	2.40593561105385	1.72200581789579	0.654939328373471	2.44938682265738	2.55447487420827	0.0355363980303436	0.474139793921544	0.73950853198889	0.131661478294032	0.255921720028611	-1.25296719804509	-0.216522213832168	1.51964103236034	0.767996170344497	3.38918165528299	0.00365240176050884	0.00969116673798848	-2.67690690392013
ENSG00000061676	5.98901497426781	5.8846758993483	5.77108800791604	5.64835794854606	5.78497669355599	5.62360095813694	5.71156885114787	6.38164434582527	6.32612184599034	6.44596065890836	6.4919609491214	6.61804532134302	6.39149761544313	6.39367260008075	-0.662354493394751	6.10444190497366	-9.44792424490564	5.00341577189815e-08	1.26867861166192e-06	7.93987657909844
ENSG00000061918	1.67921348518353	2.45170318685248	1.6771078575499	0.984159565772033	1.23752910381977	1.03024661788023	1.30030400080528	0.973382862085644	0.656385332845545	1.13658795868185	0.640284035815156	1.0302159084305	-0.560737606581581	0.74149104421078	0.83297509346157	1.06984809666794	3.06452966423281	0.00726935773755235	0.0173924421120011	-3.53350165870891
ENSG00000061936	4.16019367438117	4.39638145847673	4.57942900726114	4.46843090067842	4.51405857624922	4.66304826948692	4.47437695391732	4.89027295092155	4.98111870853779	5.02334358084006	4.65353697256483	4.81410527466404	4.25081170822836	4.62606519796484	-0.281913961637143	4.60679808815517	-2.4897984252402	0.0239031655549554	0.0474283384364791	-5.35306621338804
ENSG00000061938	2.96075323984704	2.59995475520063	2.54940434916018	2.42917249472619	2.46952838639435	2.64863952945614	2.49219250270362	3.59344707031832	3.61454574584945	4.18273921729905	4.02258846405752	3.70126540659465	3.72822958848343	3.8359302262144	-1.20634434776101	3.20202792687893	-9.8605294506519	2.74629581772874e-08	7.95837295180394e-07	8.98901913303245
ENSG00000061987	2.07437251504626	1.99100234021296	1.68597203674053	1.39600584877943	1.57913628918325	1.46612112433791	1.62338811288908	2.17939364634502	2.26077142840921	2.29723773371446	2.52532883534941	2.89024227301332	2.65707574365049	2.75885536619198	-0.819757014429166	2.09892166384738	-5.87869758585796	2.13968966647904e-05	0.000140261468997036	1.93381345907443
ENSG00000062038	7.28879381185618	7.59096888174638	7.53712917414252	7.54934587085159	7.4808663887346	7.69109713791942	7.41019341011297	7.05880207859711	6.91961484132001	6.83891856979254	7.04928278988008	6.74345740302584	6.91216970044772	6.60588867800563	0.631530526820319	7.1911806240309	7.71677721596303	7.68934705306566e-07	1.02632188719881e-05	5.08151711164613
ENSG00000062194	5.14617152938525	5.22654214716177	5.41106109059085	5.37510171626669	5.49898378451354	5.47478415679556	5.51672432409226	5.71001781979768	5.74753958727241	5.86240724869688	5.47511148043193	5.67335471676662	5.01655181564765	5.27956134650375	-0.159126234280473	5.45813662599449	-1.34613464767582	0.196636405096702	0.274929544679146	-7.26981070038196
ENSG00000062282	2.3214334297046	2.03403611266666	2.55732450411635	2.48559266823103	2.66525525257124	2.52998168753073	2.9190299022874	-0.0265930723729135	0.116909391316174	0.731673589240909	0.141386063809819	0.226892473170478	-0.694924228305895	-0.26710911092189	2.47598267447511	1.26720633307462	12.4279212226041	9.55727125311512e-10	6.09013342521802e-08	12.6621802692717
ENSG00000062370	1.67938227926938	1.41399757757204	1.47655454430966	0.74599905649372	1.11919538204767	0.588222253946936	1.06655653991263	0.149234440491688	0.278082108833496	0.14505478684902	0.921155736072946	1.09824180087725	1.07817890921726	1.36469152987395	0.43788425104092	0.937467638983403	1.87753636098335	0.0784114615412124	0.127774253369674	-5.74068769748409
ENSG00000062485	5.33425952588671	5.46657966897176	5.46971556965365	5.39645793032634	5.29980912215199	5.14926478486824	5.27324844038993	5.25673615106652	5.23893069249262	4.90804762786774	5.49169357918563	5.43983365925586	5.34278344136968	5.49260914824314	0.0311006700258467	5.32571209583784	0.343432978819879	0.735651326285632	0.796372168658047	-8.09476456720971
ENSG00000062598	3.36759515618661	3.4429585437934	3.26917919647779	3.36349960137571	3.33047357636977	3.71240731549051	3.2982173994151	3.35441395168219	3.57425830497846	3.85626845683067	3.18219693442756	3.48253011550436	3.5600941990984	3.52519957087762	-0.103059178812814	3.4513780230363	-1.02607603280312	0.319804923030423	0.410238798292926	-7.47640271249253
ENSG00000062650	5.16453336387248	4.89253718741475	4.88725612092411	4.68080707012971	4.87520638297018	4.61520490670719	4.89812954199449	4.96965638539246	4.93337392970062	4.9630200477978	5.10069944775082	5.10339828891075	5.261120160097	5.26068364762472	-0.226043508373498	4.97183046294908	-2.57314509136013	0.020181478759589	0.0411300699904483	-5.20703503253296
ENSG00000062716	5.58114509902059	5.58841302484812	5.77038546415459	5.83140058452992	5.71143148220334	5.57861525394786	5.67566043559442	5.84875987159811	5.79156279287531	5.83217311340473	5.56866584209922	5.74484547823644	6.09700350193468	5.87802903526653	-0.149928333040356	5.74986364140813	-1.87676140641099	0.0785234799866073	0.127939661970147	-6.41914260274242
ENSG00000062725	3.47162635269409	3.33198178079952	3.15091258538908	2.43228526346215	2.72359934207948	2.61411876254015	2.97349576206925	2.45732536499336	2.46584406140416	2.2312001315943	3.10749933385169	2.99718986402459	3.28721506958817	3.46252069490953	0.104146779163551	2.90762959781425	0.48658782528796	0.63301177842278	0.710409069173228	-7.48623245289591
ENSG00000062822	5.73396346561116	5.74410408356525	5.86823524651811	5.79188607678767	5.74194696554037	5.73152101051324	5.80067569066249	6.06625439426598	6.06040111905044	6.11663306346999	6.37658288676334	6.18521276312602	6.27797095031932	6.46371280048044	-0.446181422601734	5.99707860833384	-5.9671156097142	1.80430049882491e-05	0.000123113217277861	1.89967738852891
ENSG00000063015	1.76770604062115	0.364260827706469	1.62076979751936	0.523408288995369	2.3073192551963	1.05164534810578	1.4756218224564	0.181465384750436	-0.6276983077195	0.829646253854374	1.36947072179567	0.163776489587787	0.458410485087977	-0.13211574536315	0.977396417477878	0.810977618756744	3.01399628158143	0.00808567341972586	0.019009219855415	-3.65497219202765
ENSG00000063046	3.04795111659178	3.27710385228017	2.9376035545451	2.03921730456831	2.8650129946942	2.10761794908256	2.02021390234838	6.82510945413952	6.72385951605835	6.26438210352246	7.38593772426015	7.48855880289191	7.39707637819773	7.68165166524421	-4.49718914435288	4.86152116560177	-13.2609933187713	3.62385584312584e-10	3.08433213053738e-08	13.640989883975
ENSG00000063127	-0.543839243022876	-0.0178083458744998	-1.06330363316681	0.270922267487467	-0.0867324399438818	0.675811667069019	0.203235931551854	-0.55544832825111	-0.109009431453046	0.0141793549110707	-0.429928545814299	-0.500753141736413	-2.24035594234889	-1.29659440113212	0.674155839330281	-0.405687445123181	1.94235300308257	0.0695318043512422	0.115311567074393	-5.29511510783428
ENSG00000063169	3.21419105882114	3.35769426131999	3.2002446003991	3.23184433391375	3.07495916130521	3.41457539725666	3.19586579524766	3.29866518603446	3.5310885504652	3.70404060595109	3.36980596856099	3.17270080121508	3.52869567175456	3.13216695742065	-0.145156357741518	3.3161813106904	-1.48546635511572	0.156455408116666	0.227152424214236	-6.85988946008476
ENSG00000063176	4.90118782937052	5.3577057109405	5.11104821809882	4.83927362574037	4.99054946283029	4.61687504300967	5.0444533380649	3.56190433561931	3.08066627659406	2.91666042611385	3.97990874560455	3.33525409902814	3.71674023329962	3.98318446421364	1.47052098866179	4.24538655775202	8.92197840743563	1.10480296566668e-07	2.26914525420191e-06	7.50190280847847
ENSG00000063180	7.2657207452405	7.34051360026666	6.79694234009956	7.10294199276876	7.43485820682679	7.45528765067351	7.2949626189893	5.91828465677204	5.32063876387232	6.74827725821776	5.59142713353716	6.27126779245794	5.44799091294876	6.42305406749416	1.28981115646799	6.60086912429752	6.83572923220108	3.5760922559455e-06	3.40015611660742e-05	3.68084344442851
ENSG00000063241	4.99575184050749	4.99931883424098	5.19917965677514	5.15641318214201	5.00488212444352	5.90102566906186	5.31618976817397	6.53615074791056	6.55428979991571	6.93405219698999	6.25856418110365	6.2793599223697	5.74921616849953	6.09536319850702	-1.10544304797107	5.78426837790294	-6.1791297013214	1.20399746514938e-05	8.97357816799332e-05	2.48696371736207
ENSG00000063244	8.56106118977663	8.49228534194853	8.58032102139537	8.49434647341782	8.51808824523249	8.62939537001055	8.57189009600553	8.18594719482785	8.37611195731241	8.26143615838764	7.98562777280751	7.91166989323217	8.57062717118586	8.53738242753978	0.288488865996669	8.40544216522001	2.98620741289164	0.00857208081878588	0.0199535315681014	-4.40699749808905
ENSG00000063245	7.17910603184126	7.37913409082178	7.41407166412786	7.33377941578447	7.29209209217183	7.4302741072443	7.33864994433895	7.13202272818893	7.31012021142783	7.3241392324881	7.30133476477058	7.12608923681986	7.04334596516873	7.02087476524653	0.159604254763379	7.25893101788864	2.30115349154325	0.0348598435461906	0.0648645705244895	-5.75396012797987
ENSG00000063322	4.98502286154045	5.16411898690036	5.20087721148966	5.12564135852209	5.17847071118838	5.1477273878211	5.07189360189843	4.53009111268618	4.44471249832497	4.74594942660609	4.80181237441943	4.57050487679061	4.75879409353055	4.7037876981358	0.477836132925374	4.88781458570386	4.67528790764645	0.000240098394941083	0.00101456959097453	-0.225458366146953
ENSG00000063587	2.38521408864416	2.83638529796668	2.17760581052409	2.47232496112824	2.16023452482464	2.07208404948451	2.36007680302832	1.27536783086286	0.848714108360336	0.645963717970833	1.98733233997428	1.99756132468221	1.51662667903519	1.64881238344661	0.934726073040185	1.88459313713807	4.54565993300576	0.000314512422737298	0.00125960207210782	-0.4313095528307
ENSG00000063601	3.40996911812021	3.01754781723894	3.09171465626348	3.09396506770117	2.97943992000605	2.58077313653066	2.72508190645012	2.6824540961694	2.30157238805173	3.22490628100241	3.52801926178093	3.29676511282693	4.29315409184773	3.5380660451507	-0.285554023127109	3.12595920708146	-1.15726014907158	0.263801879976156	0.349916993335345	-7.08039704650628
ENSG00000063660	4.56994157987568	4.66683681308205	4.59820623278591	4.46031925730489	4.45253222076195	4.61903439471967	4.51949092664264	4.58599910799641	4.48829923592514	5.36887290768126	4.57285907854505	4.65116255299694	5.13893714121674	4.46402416110369	-0.196631227934667	4.65403682933129	-1.43373507182067	0.170504501600074	0.24396757770747	-6.82131682267992
ENSG00000063761	2.94301304012263	2.4704773076977	2.76948745606412	2.84637856495791	2.98825626661287	2.4987046352125	2.83718885956624	1.92442644830559	1.94387419528811	2.18293077519513	1.97849298472739	1.93261717202715	1.87303408905708	2.10473004410781	0.770379429792178	2.37811513135302	7.26012770811105	1.68354045251048e-06	1.89550146600416e-05	4.65311180778394
ENSG00000063978	3.87163462753189	3.69373858812353	3.7479941695143	3.60662776860047	3.67759448660522	3.30143021563013	3.70611113035655	2.70963021663362	2.69673252545825	2.00368141532075	3.52900743597523	2.908382106599	3.40748957391273	3.38275498405619	0.707220419416644	3.30305780316556	3.68922078165026	0.00192662779184268	0.00569150166371779	-2.42922877875302
ENSG00000064012	1.17569212360059	0.55121597451496	0.554852635276431	0.893074159346084	0.96438310986383	0.228858518754666	0.90482129473343	0.812867560919786	1.48659889233447	1.9891688673259	1.34503688780756	0.461262344081959	1.45420828101061	1.1869546766187	-0.492124234766873	1.00064252329921	-2.20490809487597	0.0421129753994706	0.0761487184054311	-5.1603081629834
ENSG00000064042	1.00471665626792	-1.14590330447668	-0.133337954244665	0.465289046256002	0.88305944651941	-0.210019594070916	0.67615630225419	2.22917156767744	0.315011787825154	3.75580990200667	0.277992258374666	-0.872229620199277	2.6223623573453	-0.962832885907547	-0.888550774446433	0.636088997544834	-1.28507591734568	0.216681198405392	0.297722608466022	-6.80457173965683
ENSG00000064102	5.33150937431363	4.95881844547933	5.18687506555235	5.5463577428631	5.50114711486964	5.36067022432432	5.28118312379348	5.69956463798435	5.95469414652253	5.62648492907853	5.47992895286901	5.63767717048387	5.09391965699442	5.67447572313804	-0.286608761989676	5.45237902201904	-2.41460087414809	0.0278109523220179	0.0536004910073286	-5.48499171293304
ENSG00000064115	4.51480040252742	4.65243962332897	4.51179038784358	4.83032198023408	4.64163160165131	4.66597050955676	4.63941758667297	5.17499117773396	5.13506824176838	5.31741497968223	4.94756872993127	5.57096645332299	5.20923497021523	5.29943184743305	-0.60202824627766	4.9365034637073	-6.60027032680472	5.48941364111428e-06	4.74851836716432e-05	3.19851121589023
ENSG00000064225	0.969617453872143	1.06883783237639	0.817417504197339	1.12096908661494	1.33422991371805	1.17322470497334	1.25708901116077	1.21392236717431	0.936633222737273	1.11683083594038	0.615134159539418	1.02451176138605	-0.0876613498763674	0.251064985665485	0.377289004867874	0.915130106391395	1.92622997805402	0.0716521632186245	0.118344209327436	-5.65207912031307
ENSG00000064270	-0.537808973283397	0.185047713821239	-0.670879344951929	-0.158066303131903	-0.450233343228091	0.487285344154798	-0.0660734736079507	0.980029031737919	1.18938758213445	0.209432829331246	0.466579610435874	0.674648834469476	-0.0467182656922762	0.604453353976949	-0.745210994168323	0.204791756869029	-3.12962556316709	0.00633590839033002	0.0154537757552518	-3.13027944073428
ENSG00000064300	2.1278622769638	2.69994454680352	1.1577016047708	3.58580496619567	2.41183468879711	2.97966410420882	1.92217496216031	3.36357916709016	3.21519428602814	5.41928058990825	2.88317403362286	3.06703316597983	2.42110322594903	2.73444845864396	-0.870561349418294	2.85634286265159	-2.05128175374923	0.0566256264305378	0.0975085596047079	-5.77095455347346
ENSG00000064309	2.31115308055491	2.25122847417229	2.04677707759228	1.7856505313004	2.00600589137171	2.24284454204804	1.89373139015201	2.59328476423789	2.55935004549702	2.45662298877491	2.80448367433221	2.7783049291272	2.50027269603242	2.28156883728779	-0.486972778963822	2.32223420874865	-4.60126878469127	0.000280064580418073	0.00115079878739648	-0.754133115012499
ENSG00000064313	4.09276316060094	3.98601045505126	3.84105718687601	3.7520173987522	4.00178253157255	3.69220590943975	3.91211856761952	3.92781417008224	3.73810567834048	3.82492758156999	4.11606576922024	4.02336174010106	4.06226345199596	4.10130199303321	-0.0747731050236338	3.93369968530396	-0.880541244709302	0.391332150669185	0.482963932003722	-7.6740738926731
ENSG00000064393	2.21294488300446	2.17825834834637	1.88543934829708	1.42019418691657	2.08833442512362	1.77836076625511	1.82440893108716	2.66293857732123	2.47354655206512	2.36684756161823	2.7788920472688	3.20891403007492	2.82235809489995	2.71413197953341	-0.80829958393007	2.31539783798657	-5.86678216305918	2.18959336151212e-05	0.000142446200623034	1.77586056241483
ENSG00000064419	6.74276955511873	6.6799875497171	6.5669070974038	6.62962234987815	6.60756843629965	6.60762838659929	6.63547752784983	6.28221043258018	6.35006262975412	6.10093035304108	6.3569897504778	6.62346150003529	6.32064453993952	6.46872267314133	0.280833995371014	6.49807019870256	3.85311491397155	0.00135854404152005	0.0042353584859991	-2.59288801424219
ENSG00000064490	4.39190990196051	4.7930850723623	4.65969874804668	4.60552205887933	4.48815069725564	4.6458918054178	4.74911068415502	4.33935244242207	4.32629972354019	4.48290708801727	4.37945247046128	4.07176888609361	4.5092975059851	4.42462010212457	0.260939932970198	4.49050479905153	2.89748240442084	0.0103238383413423	0.0232774057896401	-4.34518418360663
ENSG00000064545	4.78329220186291	5.08738638742536	5.34959504791388	5.05450426330953	5.04471252200772	5.41531231834773	5.29556680620817	5.78708971553318	5.80909083077008	5.93350516837762	5.60735050019933	5.51962101002982	4.99087850711812	5.29165507240297	-0.409555001517456	5.35496859653617	-2.87404830763611	0.0108418163982737	0.0242298471141001	-4.48716665672229
ENSG00000064547	4.16607085613053	3.95548438659768	3.99935229652209	4.00618326592776	4.08225250531733	3.97952189772954	4.01552926725541	4.04937260683429	4.19039242965623	4.14296392812422	4.21908699524472	4.11791465812814	4.61908794211005	4.4431261663974	-0.226612805867179	4.14188137156967	-2.27674582426243	0.0365802948627092	0.0675597524695043	-5.45005377960988
ENSG00000064601	4.23060886653669	4.54985216791541	4.22064883628959	4.43621575399046	4.32758754441751	4.58248949599415	4.31763070956157	4.66895412811678	4.56927292279527	4.88768286199681	4.38861170421053	4.13418796316978	4.78781635889678	4.36051652989353	-0.16091193534635	4.46157684598463	-1.39116036599321	0.182828012023272	0.25874415515526	-6.99895425853886
ENSG00000064607	5.74716189946353	5.83802432864401	5.47681519513911	5.69667273443206	5.70453724110228	5.79104483777194	5.53126240218344	5.83082327615472	5.76767977702959	5.99549937304254	5.62853012221012	6.14254223930224	5.42621742919049	5.91903883950314	-0.131311834009479	5.74970354965495	-1.30402710284528	0.210294035788877	0.290447178753559	-7.32826947795656
ENSG00000064651	2.64400883884484	2.05878201704113	1.6914206865651	1.03796065690116	1.68683074249192	1.36920018302567	1.38651349879836	2.10756478031668	1.71853407736771	1.86039040550737	2.0357944527035	2.09308016629236	2.83171736730813	2.52671078748771	-0.477425698902274	1.93203633290369	-2.16245679691946	0.0457364858206672	0.0815386457895617	-5.63368939923358
ENSG00000064655	0.0206443890166663	0.214344171895272	0.418029436867636	-1.13715103939793	-0.0776421592970227	-0.943604821378843	0.175681260127124	-0.720342844540484	-0.86254168237418	-0.845713480956403	0.113075232714453	-0.784346857733868	-1.06498348577315	-1.07653644410049	0.561982137274064	-0.469363451780802	2.01982706739622	0.0601093943268932	0.102255455090496	-5.17701286779747
ENSG00000064687	2.66537861187759	2.53702900777365	2.6098287071233	2.52729772394546	3.07434398601633	3.36447688967028	2.77644390521089	2.869653768301	3.08179719638804	3.58283982212759	2.64147060090168	2.60795890175662	2.26458056534111	2.59362839040458	-0.000647702118002247	2.79976629120272	-0.00352464207639139	0.997230416499338	0.998132516382684	-7.89848837403723
ENSG00000064692	-0.3618522784974	-0.0744482095955807	0.165286874916941	-0.518581289856117	-0.406760522769338	0.0693401094296671	0.0115595641119066	1.56803243434884	1.07751855422566	1.1351135293403	1.96868285216708	0.450974493560284	0.0949162684869798	-0.478896536253604	-0.98035151809722	0.335777560258258	-2.97242659657085	0.00882377594771984	0.0204365703253469	-3.68517051281043
ENSG00000064703	3.68957023810796	3.54608456125762	3.99348816960199	3.87219485192367	3.79520546576298	3.58513485069084	3.8836660008857	3.43482594079023	3.29005231317173	3.03598400508573	3.49785233156954	3.39806594456281	4.00906652802604	3.80365039524185	0.26222345801611	3.63106011404848	1.96031608444509	0.0672359216947818	0.112207377340901	-6.04830298561283
ENSG00000064726	4.89535917079702	4.71207183228916	4.84134394715032	4.72810700625526	4.52132204354466	4.68706899389459	4.50506272830178	5.39667454936481	5.29298798696252	5.26707605525871	5.36540113751628	5.52823769087763	5.34252257855119	5.32260267747138	-0.660607644327775	5.02898845701681	-8.65266254175556	1.67821037351384e-07	3.10890387458705e-06	6.80771152808818
ENSG00000064763	2.07588933712803	2.12873662811901	2.18815691729301	2.42190260459618	2.37779685472291	2.35490966237883	1.97045089027681	3.8541354584831	3.1557739523764	3.03637174087851	4.03136203187387	3.68248296069629	3.17083033362501	3.46470028357701	-1.26920614349087	2.85096426114464	-7.47747215961083	1.15542800445005e-06	1.41904280950166e-05	5.13046455303264
ENSG00000064932	4.09098320459216	4.02111463857225	4.08374494016557	4.02189591026628	3.84361100223145	4.21093315903312	4.15960355315161	4.00399701844742	4.11057163221387	4.31463401846368	4.41447295723109	4.37260923305322	4.27341942447446	4.20565344041582	-0.174729788464	4.15194600945086	-2.08962821799429	0.0526274533674764	0.0917137363882525	-5.96208147989418
ENSG00000064933	4.23188066814324	4.60636471705267	4.40428943743619	4.24778549735867	4.82380660252487	4.50019602928957	4.6958690102407	4.97043227862969	4.87601212331433	5.12440799004876	4.65646889647157	4.97955793838905	4.51412247887592	5.11014174062967	-0.388061313443741	4.69580967202892	-3.32630220175086	0.00417518578888899	0.0108604800676572	-3.57986958609652
ENSG00000064961	5.84016907773371	6.23517316055833	6.30558899753614	6.4253863007663	6.27708252223192	6.62677107464169	6.28904605226266	6.21734706602299	6.3687358812905	6.4568422726162	5.98713162713642	6.03092329240742	5.18261851755721	5.73443545554403	0.295180079292545	6.14123223559325	1.73965809942359	0.100715721735143	0.157448551350571	-6.58681088388977
ENSG00000064995	5.33514149817732	5.53919465909526	5.65610851908131	5.82486783061694	5.74770499192114	5.72397965218395	5.76883456360441	5.98101281084005	6.01570091650535	5.84246564931394	5.62117845303755	5.50702657024567	5.52392892927683	5.66346945608515	-0.081272009373623	5.69647246428463	-0.785836453893759	0.443208935183957	0.535095322896929	-7.7348392872207
ENSG00000064999	4.27442535117367	4.17332394985579	3.86031451084679	3.86121037047626	3.94232392704722	3.75156788514298	3.88731015512092	3.97886249990215	4.0527506564385	3.70133089605261	4.33914836826238	4.30777426763813	4.32083211742826	4.52584324946713	-0.210415946163812	4.06978701463234	-1.7426582136975	0.100176706671252	0.156716027878638	-6.6350602966659
ENSG00000065000	6.88534469128671	6.78792484304098	6.70134352649327	6.61526922383221	6.66775374324372	6.62497782005486	6.68048097227408	6.67494927184972	6.53835090754633	6.74370097364845	6.87285696922349	6.72286486317266	6.89807524961873	6.87578107466059	-0.051518427002895	6.73497672356756	-0.725679046769421	0.478300008039018	0.569106403152106	-7.91701270961152
ENSG00000065029	3.40422988101169	3.54410216947866	3.58729647881277	3.58136476826167	3.81305910265348	3.77252913513349	3.49469377352332	2.73796322248155	2.92971975047369	2.99932176527087	2.67903508644245	2.59612508791492	2.7998268298999	2.85065683254345	0.803255377957963	3.19928027742157	9.04603664781457	9.13898924167057e-08	1.97567740782189e-06	7.52725738654827
ENSG00000065054	4.418913361436	4.45334101079701	3.99573970652325	5.39579155285713	4.70290632692558	4.72577537756779	4.23868186090942	5.47550020074634	5.47172761054399	5.06880417320232	5.57429237601213	4.78495339415855	4.82471267806406	4.92518351803431	-0.598800221000046	4.86116593912699	-2.60576513768715	0.0188808728590169	0.0388633694515635	-4.096974172442
ENSG00000065057	6.11131572055455	5.81477911940754	6.44665903415033	6.24772066091142	6.34127770691566	6.43764095859979	6.27476489519573	6.51572029529945	6.67900166579304	6.28005954622916	6.55507361795179	6.44935371235277	6.34839727596794	6.52824684631493	-0.239525089207047	6.35928650397458	-2.32410740773704	0.0333110155574063	0.0624408394192502	-5.47213090094273
ENSG00000065060	3.91659349070446	3.72638355617383	3.17875306253583	2.93975306404725	3.39564964028232	2.50130403485391	3.12217385200396	2.30114622777891	2.50832554511704	1.66374416684978	3.50689504523192	3.96903249261833	3.81496047237482	3.92030600446028	0.149089354387397	3.1760729039309	0.433698792702113	0.670178057288656	0.741656404369907	-7.72006967870525
ENSG00000065135	6.18033160432253	6.15215346713013	6.30085086259121	6.20803235103695	6.1762701052955	6.03430636601844	6.12635838096995	5.93784473181087	5.92587003804671	5.95678058246287	5.94182961714936	5.82491396659215	6.24389663806557	6.25827269129611	0.155286221194506	6.09055081448488	1.99676233832547	0.0627861572529867	0.106016970023044	-6.27402259770331
ENSG00000065150	6.27484705201491	6.00934247855569	5.99373677906572	5.82039784584409	6.00552259007517	5.61472058433521	5.91748282579891	6.61174353541822	6.63986452836396	6.54874332785147	6.87062561325191	6.84506516196752	7.08420550247269	6.81129641838465	-0.826240808842496	6.36054244595715	-8.20367208340176	3.43572085702386e-07	5.50212612511019e-06	5.93033669805458
ENSG00000065154	6.12754666805515	6.04111904029412	5.7817322362071	5.98223730372324	5.8419962300605	5.64789206572487	5.81038593221482	5.61878388079223	5.39231602563298	5.64006214138194	5.15055443158498	5.10560490256062	5.18227714495014	5.14578380561652	0.567574933163877	5.6048779863428	5.29232909426323	6.80111095984871e-05	0.000360367094002258	0.596139361781702
ENSG00000065183	5.5145094503173	4.88885162647944	5.19809438488217	5.19334636680205	5.38262325093591	5.02861206944963	5.2029586299406	5.5338512088286	5.61816239338484	5.10451127836362	5.81122601599164	5.63581487877193	6.00233183727123	6.30289704283115	-0.516568897574762	5.45841360244644	-3.43986657281368	0.00327871229658406	0.00886782385816101	-3.3974536618387
ENSG00000065243	4.17138054963771	4.00578556135205	3.83431853022572	3.68135313276836	3.90605308247535	3.67163356671855	3.83439145116365	3.84445094962799	3.75847388898186	3.50127425021965	4.15288021275958	4.30309936777754	4.38562173253423	4.12959608388842	-0.142739884405802	3.94145088286648	-1.07769219942381	0.29682277569564	0.385388308405337	-7.40594652294583
ENSG00000065268	6.58940487572107	6.97362864834035	7.14507133289681	7.09665625626375	6.97096222324748	7.08627912778763	7.18392308733363	6.48317500045779	7.06585730115241	6.66922416192695	6.60147016609311	6.70728217147978	6.23413646954088	6.28083800240747	0.430469953289373	6.79199348747494	3.50851813353781	0.00283246302385079	0.00783497896892908	-3.26983933589921
ENSG00000065308	3.94324936655643	3.23702631116775	3.27679332977425	3.1234914007799	3.26712241069864	2.64930348919339	3.2899134473418	2.95526403829461	3.2370487177886	2.85717317884424	3.64514217707427	3.13127172639204	4.99485362810495	3.84656718669614	-0.283030091762162	3.3895871720505	-0.957866169631527	0.352087697492736	0.443930318676483	-7.07967599042443
ENSG00000065328	5.54843850528971	5.24143769405172	5.29689206031076	5.26444309757941	5.1633209705332	4.82769662924811	5.19589860161018	4.93579876362581	4.74871044278415	4.72413109015329	5.01326941664489	4.58523889251038	5.09484057151151	4.95754730734878	0.351313996177856	5.04269028880013	3.29665628503636	0.00444673325547871	0.0114493739057397	-3.65892218632447
ENSG00000065357	1.80478891010782	1.97821733959726	2.11044877989995	2.37998397213967	1.86508314100542	2.5030168255161	2.29766638411018	1.98186864525217	2.18538529117508	2.36687687123805	1.96849886769076	2.04548676396589	1.89043243825073	1.35189127895764	0.167104341434438	2.05211753635048	1.13023777514916	0.274692212267577	0.361513723562789	-7.20416524971928
ENSG00000065361	4.96915328347819	5.25773424578	5.12722477777552	4.91902667207209	5.10802175751026	5.13220775261199	5.13592130077208	4.39882468772426	4.27847181520237	4.20266910398298	4.5231343156657	4.45309250851936	4.67280879944949	4.47273789888911	0.663779500970797	4.76078777995953	8.39791590757384	2.51231928661681e-07	4.29999214372949e-06	6.28939941387048
ENSG00000065427	8.12326124175645	8.03868130655828	8.22422770249125	8.39882891805879	8.21249667232425	8.31836264685639	8.16881811358698	8.24985551468759	8.36593152835244	8.01913066994816	7.95535964525723	7.8461349390746	7.86256719333169	8.02310963074979	0.165855594113964	8.12905469450242	1.87809616766357	0.0783306308389106	0.127676725316778	-6.48750628200307
ENSG00000065457	4.24817884849611	3.54325422014829	3.3896007320089	3.88027355314864	5.07287317069012	3.90989720240336	3.58022492390692	3.23047239423462	2.79776511116654	2.74389066644264	3.59595249771052	3.75566191215184	3.86924180722634	3.69858265754204	0.544210015657272	3.6654192640912	2.14074994161417	0.047698303147763	0.0845522935641456	-5.43929221924227
ENSG00000065485	4.40246000524408	4.28902039998409	4.35254314757408	4.69934257361785	4.38161742499533	4.56605871728103	4.65817807235925	4.54132169402936	4.85539882559199	4.63655848354993	4.56452780754439	4.45976227108909	4.4647663276927	4.26022419897996	-0.0621620158717686	4.50941285353808	-0.641309637673396	0.530213822810856	0.618718354499609	-7.79429879431037
ENSG00000065491	4.12668973405586	4.09712155977694	4.17302852908693	4.04093518427225	3.99673880010323	3.98172926347618	4.12809128896298	4.01713346979442	3.93336455011857	3.66945305765713	4.22567061710201	4.32308041139374	4.18094226789533	4.48030529062655	-0.0403074587797718	4.09816314459444	-0.350654169069373	0.730327097567906	0.792229153698662	-7.70928947268712
ENSG00000065518	5.21616592521316	5.52743400774001	5.64727554708502	5.87755739843209	5.957623495379	6.02599400508773	5.77132169350468	6.32210481203178	6.02611946806577	6.14377042875467	5.60484235473274	6.24159939057604	5.33596178117933	6.00455166456037	-0.237894837438928	5.8358801408816	-1.50098288086386	0.152433307370639	0.222267375585006	-6.94989871668156
ENSG00000065526	3.9754257683241	3.80073415464984	3.71825188996523	3.75459258925722	3.68452176776307	3.77869332941626	3.73438524978817	3.55727577913483	3.26655454649044	3.47378969268583	3.62883336984172	3.94341164918305	3.8838269264271	3.86428755206165	0.117060298186126	3.71889887607061	1.12272485631192	0.277778911268021	0.364944638281853	-7.34049755102836
ENSG00000065534	2.39476871843984	1.6171416495732	2.00736555523468	1.65713692940156	1.86797008037151	1.74041733688215	2.01073606155912	2.37928466757845	2.4379625810559	1.91943783908183	2.29516371189596	2.61373794527181	1.18428065137131	1.73641952779427	-0.183094380779975	1.99013023253654	-0.924789797973327	0.368530416730676	0.460393042853389	-7.50106423032721
ENSG00000065548	4.7749331179643	4.22475633114229	4.57281843744318	4.4479884948574	4.54740404978779	4.30632761414969	4.39293515021747	6.10967925134808	5.9915882746542	5.72278609580815	5.87407237342667	5.65691573597829	6.06718736414724	5.97901868630607	-1.45497584022327	5.19060078408792	-13.3699793712849	3.20418390135675e-10	2.86750898995684e-08	13.5290782833859
ENSG00000065559	4.06250465284627	3.5845564001971	2.72941437782297	3.08080525957789	2.99253830711148	3.25937504015951	3.31130698026869	2.99358064780411	3.26340186443624	2.64084454433214	3.4763032014064	3.67729183207613	4.18666560855678	4.1123618120998	-0.188015863731338	3.38363932347825	-0.70642519679512	0.489873908573232	0.580720302059492	-6.93405367376199
ENSG00000065600	2.65494051120074	2.73141338298477	2.38404367923337	2.83972318727203	2.58956920693124	3.08864349421449	2.56842137448115	3.76756427761534	3.83649842667527	3.64278989864327	3.60753094896121	3.39306735579359	3.24610503217792	3.66020656641774	-0.889755034473972	3.14360838161444	-7.02688427102012	2.53937887199902e-06	2.59720842446219e-05	4.2796626423459
ENSG00000065613	4.14911203710183	4.03321526173835	3.76714579050328	3.47821713875258	3.77841247849681	3.5298324362585	3.74987302781591	3.96460581026805	4.09636393239517	4.21829708782619	3.87175000714389	4.34802802874321	4.15934650605955	4.06875130907091	-0.321527199051225	3.94378220372673	-3.01046201980232	0.00814600626840098	0.0191252010595502	-4.28891765741457
ENSG00000065615	2.62559004049289	2.81596828796838	3.0065720293534	2.86507242265293	2.88206639498492	2.97802092826706	2.86393655952256	3.0626811774658	3.27865403626063	3.23476510879715	3.05838202048348	3.00946881956024	2.94443803136209	3.161561036564	-0.239105760065717	2.98479834955254	-2.46754051067861	0.0250021349015358	0.0492157502646922	-4.94998353271886
ENSG00000065618	-0.625038702672277	-0.807214176893714	-2.28004950797117	-1.1555938949075	-1.66606546721862	-1.0615844595064	-1.97417728556912	-2.6861813369919	-2.77099998574777	-0.521684454734758	-1.54180583365759	-2.26305307368496	1.3469580678195	-1.54875998710563	0.0634512127558309	-1.39680357848871	0.117254668065978	0.908087247172201	0.932764780600292	-7.10032030736135
ENSG00000065621	3.24336840918232	2.90088568741563	2.96247016122454	3.02778661637607	2.90629358768272	3.02804768855629	2.81499515314469	3.20275946000554	2.77373448859602	2.69100609591121	2.88457292912216	3.0188671030924	1.87867592065862	2.57054826424216	0.267624957822235	2.85028654037217	1.59293092607869	0.130331641019339	0.195618005037166	-6.40436176447617
ENSG00000065665	4.21931965352211	4.04667519745407	3.95225652376629	4.26558269616382	4.11500448106832	4.28104942532215	4.0131102578256	3.96240582816615	3.98347144133783	4.34408320537177	3.77211059223861	4.14008266544534	3.94642166993526	4.14141900100538	0.0880110299491763	4.08449947418734	0.940021311521176	0.360894609707898	0.45306325887105	-7.50751837450629
ENSG00000065675	2.52612459720561	2.46821377594146	2.81547929387581	2.2584683670529	2.50543787899877	2.78670378425654	2.89985726900928	3.04218409291217	3.22290640501564	2.82638275411107	2.85532812926741	3.17351230193968	3.86761409426361	3.17557653411986	-0.564993904422114	2.88741351985499	-3.5622304735148	0.00252595608764558	0.00714132672305097	-2.78857604230991
ENSG00000065717	3.82986964438989	2.6592155828341	3.4481488573625	2.66771060456531	3.44923243768289	4.11575853111232	3.17183903194315	2.62253138517062	2.14843776193297	3.01043310782067	2.63915646223677	2.37243912698544	2.56988090612529	2.59762484438469	0.782542374499951	2.95016273461047	3.47690153969123	0.00302992615388356	0.00829820684494079	-2.84731051538039
ENSG00000065802	4.3823890875791	4.34213060085883	4.2024872063868	4.26936970864988	4.20221194291022	4.25185679385204	4.13346446118273	4.0181243740895	4.17552771079797	4.16015578391801	4.17576074485485	3.96412478775528	3.98303321558547	3.98663402849675	0.192925871138059	4.16051931763696	2.49643825949438	0.0235842910383191	0.0468643928534501	-5.08563934332287
ENSG00000065809	4.26349533619967	3.65203848877805	3.77338614879777	3.65466172588896	3.83424044030619	3.55407724007482	3.73874385162472	3.84068222286251	3.71866452814966	3.50714589841864	4.26814373918739	3.73760574900917	3.69674756146799	3.50285710888633	0.0267372482406687	3.76732071711799	0.214253939336044	0.832999578476896	0.87445556922911	-7.98482267710741
ENSG00000065833	4.28483512320122	3.45671643566469	3.44149658625283	3.64823525707867	3.4310020996406	2.69036207686051	3.24118212188949	3.15626558339797	2.68690427333978	3.35327337675056	2.73584127293764	3.12416801666916	3.90450637991253	3.27331906887645	0.257933958497988	3.31629340517658	1.18765015046713	0.251947150243335	0.336898348232436	-7.13844043652373
ENSG00000065882	4.68170995838141	4.89377803882109	4.74416763996245	4.91245464127958	4.97920011756673	4.88176420476776	5.00958254988177	4.93237107260666	5.27184935682522	5.07246147239332	5.30585044197646	5.41329714727281	4.88662872273996	4.67500519255044	-0.207879913645987	4.9757228969304	-1.95456500216716	0.067963447853832	0.113111325561191	-6.34211207256014
ENSG00000065883	4.16900608618226	3.80620748279791	3.8699395604859	3.67756385310549	3.79570281433304	3.65196121263378	4.0299487059856	4.04233861473306	3.97171160556338	4.16335882717472	4.02317047066201	4.35531904134762	4.28472975308245	4.22483894899119	-0.297220051794405	4.00469978407703	-3.20744724309613	0.00537358443807581	0.0134433496805387	-3.86049832146031
ENSG00000065911	6.58808451148734	6.26705190294757	6.47014364188147	6.12897412732873	6.71190354514614	6.31231169040987	6.30006328693709	7.32276460539546	7.71359502495882	7.31834269093456	7.40090128411627	7.73110113570056	7.49207161542799	7.51047119829571	-1.1034142762663	6.94769859006911	-11.1777099117079	4.54763044823675e-09	1.96273794984005e-07	10.5121651882967
ENSG00000065923	3.23980523154571	2.87040057746104	1.34580607646797	2.09650636112541	2.17009986477339	1.21684376747415	1.73834766546319	2.73441390783461	2.64586613035731	3.11307607350829	3.20587758455834	3.8976267228949	3.48363460616533	4.47499130361998	-1.26839326689832	2.73094970523212	-3.65616044343549	0.00206738218973997	0.00604567723001566	-2.12557888003491
ENSG00000065970	2.94011206114535	2.64770105279754	2.78264118785657	2.87618857588322	2.91991124367955	3.08010944831297	2.52968196123418	2.64134191479951	2.84916684391491	2.51471645345086	2.97581144723462	2.85210939834646	2.35055141870041	2.59964914130948	0.148870533272297	2.75426372490469	1.27818719635564	0.219040419869592	0.300387712702287	-6.99481145298046
ENSG00000065978	3.24884684998193	3.14818617508768	3.57489073513412	3.38147454548709	3.29747311417554	3.4669909138218	3.0435954004459	3.0349472251639	3.69823791918329	2.56993732984821	3.14801927457081	3.14586621687691	2.55464968446597	3.25369019989281	0.258330878303403	3.18334325600971	1.39277819140604	0.182346848349956	0.258153250118333	-6.29075962880808
ENSG00000065989	0.153437993993611	0.0531613257749868	0.48686139109797	0.999066805479462	0.683216809699279	0.880177082183663	1.11033707697107	0.174870869514214	0.191446630956237	0.730473020639018	0.454035499612579	0.982600275790773	0.601173629466795	0.708978724711315	0.0758852745992168	0.586416938277927	0.346502506030937	0.733386427937267	0.794839377954095	-7.02323920579045
ENSG00000066027	4.66812440871472	4.54407507108681	4.46870421616578	4.71288109795883	4.66049146589988	4.45237141798365	4.37878261726279	4.39717147006441	4.49420061428387	4.39270221347327	4.77966744129166	4.92981213644954	4.4830157911166	4.6143837057041	-0.0295541404560318	4.56974169053256	-0.300638556222179	0.767481182746029	0.821260196518544	-7.92059422759386
ENSG00000066032	0.171044484155455	0.392950105404387	0.673078937251297	0.562874452198724	0.0263818799570052	0.66384492991166	0.583332224427635	1.47725131810252	1.42379357630761	1.5775703980106	1.3976894725177	1.05500573059928	-0.141947551424826	0.276389715606033	-0.557004359385972	0.724232833787506	-2.11182813716728	0.0504323137190718	0.088590866154625	-5.44886143278062
ENSG00000066044	5.54546514803766	5.68187050918251	5.67216875332387	5.67071005666404	5.65573793803224	5.78239741000915	5.63685466051898	5.71610012734218	5.66877094489128	5.66539162819043	5.59837476781821	5.60551978144716	5.39381099829376	5.49152682583821	0.0726257501939598	5.62747853925641	1.12663910971538	0.276167521974186	0.363141195975348	-7.53597510707589
ENSG00000066056	-1.80710076133213	-0.970392848071419	-0.924980204432159	-0.124134192028014	-0.997805385893607	-0.342145222467816	-0.699123481620351	0.617639567822612	0.27340589529619	1.90555604849003	0.710241718602242	-0.870171509033673	0.429713753801346	-0.0609402976880635	-1.25029912805445	-0.20430263703963	-3.4352778148482	0.00331091899996158	0.00893705813895151	-2.6755085174048
ENSG00000066084	3.77052211339562	3.30196806206528	3.11330489686255	2.86585437216527	3.1702339162935	2.77465324273249	3.05485414104339	3.6523162308421	3.86719920453616	3.29887161487545	3.83787492943469	4.06101704703817	3.93157089419013	3.96314175085794	-0.654632977302708	3.47595588688091	-4.55612782526129	0.000307712527406267	0.00123889155509814	-0.982127987485674
ENSG00000066117	6.11303905784792	6.39601809666292	6.39245711604332	6.43977477761786	6.36603638543292	6.28307662113348	6.33640994985037	6.0837407793017	5.95761329302868	6.02489183812337	6.32639513613668	6.22523283676723	6.16320448033082	6.24617981944683	0.185905440838977	6.23957644198029	2.54865713231175	0.0212135036290617	0.0428957555523027	-5.28421682070204
ENSG00000066135	5.61443584898904	5.13670401758499	5.24916730212047	5.18483897629912	5.19001510119656	5.1215224884414	5.32677548541212	5.27813716311667	5.16685870092593	5.15833468106974	5.51313747146103	5.64768467463932	5.71247682581373	5.7246223493891	-0.197379503121555	5.35890793474709	-1.78581076343342	0.0926977413150099	0.146923324592393	-6.61085825811918
ENSG00000066136	4.03258477441491	4.38939980733299	4.41598352902112	4.47936946550651	4.55109903602129	4.48133417439586	4.44800743041382	3.96801497040088	3.81430779433685	4.08395684682322	3.79016354787736	3.75594059393286	3.83356396040622	3.62003252519119	0.559229217565129	4.11883988971965	5.9093972628638	2.01646775569334e-05	0.000133892138868214	1.93017498754172
ENSG00000066230	0.853964153151458	0.559897265919835	0.739808390560547	1.28904044097118	-0.0585296362358529	1.08917184809203	0.351427407986711	0.493534299456635	-0.315216312148158	1.63848722399391	-0.81055378158008	1.82628182522214	0.479358756534695	0.83814035786681	0.093499726325464	0.64105801712799	0.26038383673636	0.797820129486555	0.847096641017261	-7.20534683396522
ENSG00000066248	-0.45299713237557	0.912718708218945	0.337447895868567	0.944815999765804	0.855109249857868	0.935575252177349	0.207322075450082	0.973779360722246	1.17680989640359	1.56772307519512	0.359227134082486	1.35047782005451	0.170468081797592	0.421842834615565	-0.323825631699766	0.697165732273868	-1.20356940192355	0.245901526498447	0.330047141487936	-6.64045953068671
ENSG00000066279	4.26790889299037	4.31814116603335	4.08650040430989	3.81103035389695	3.85590976783549	3.82937294607949	3.93396742195772	4.08420024804966	4.41438957519522	4.34939708481193	4.53795682897275	4.7839557251981	4.3965357153517	4.73252960349752	-0.453087046705884	4.2429854095843	-3.88540075709704	0.00126827950831771	0.00400317165345821	-2.43917772812406
ENSG00000066322	4.5111628327263	3.68039965439223	4.1714092584085	3.83184630285542	3.77834781247774	4.05253620964395	4.13197021380185	3.7704433402777	4.07709037693122	4.08145104685474	3.81673657060263	3.50408674983386	4.4478392108929	4.38628128454161	0.0155897320509313	4.01725720458862	0.0960699513234618	0.924633278851471	0.944045938645269	-7.75063008231905
ENSG00000066379	4.48381254796158	4.54697834534291	4.65904135876781	5.2127148148613	4.79541356609012	4.92628796510155	4.72771040984455	5.03627537558947	5.14480541469694	5.0478843298763	4.93417765783393	4.5258289199355	4.44250389331237	4.85086735941834	-0.0848064239817443	4.80959299704519	-0.605842299650337	0.55294183870375	0.639902550048811	-7.58004660731425
ENSG00000066382	-0.611064221186467	-1.00656043680093	-0.84651315487588	-1.58014366440044	-1.32249338639731	-1.26771275674226	-1.29565656031606	0.132766125775805	-0.278283781552727	-1.03070506297931	-0.528523129823143	-1.41979174492809	0.171943405321292	-0.925195851994629	-0.593328633843916	-0.843423872921439	-2.27473363619069	0.0367256028111494	0.0677664208330047	-4.94705666699034
ENSG00000066422	2.27237370913894	1.80219885118381	1.87793537262203	1.98697949303012	2.01175845417607	1.48996436935596	1.82121855938858	1.93675560326176	2.04733578866981	1.68162307504472	2.33964844868994	2.20338089493779	2.40957733068853	2.44042087137105	-0.262923114478525	2.02294077296851	-1.84125214703739	0.0838112573162283	0.135197722040532	-6.07029720540499
ENSG00000066427	4.73900525363531	4.73117161869182	4.77922478123365	4.55873969176392	4.7268649714029	4.74041540197196	4.47131998134293	4.20505062989814	4.58951281404056	4.68844581013497	4.20016612199741	4.28930557458328	3.86612336354026	4.08705228401208	0.410136557713107	4.47659987844637	3.53278351851524	0.00268965312382951	0.00750820370874519	-2.99146749116575
ENSG00000066455	4.82480511502024	4.77776223847139	5.00523440555399	5.11944867389358	5.07636437825547	4.94916405959712	5.01974249917462	5.0979374110009	5.22464866702041	5.11026789126051	4.86456786650169	4.88894762594377	4.88217890747377	4.96829751024925	-0.0399797794157699	4.98638337495834	-0.485583802499044	0.63370838376132	0.710994168395928	-7.91675322400874
ENSG00000066468	4.55467650290002	4.41418739023961	4.96396719855677	4.48853519388694	4.88167093020291	4.90546626105322	5.00362899629457	5.02816355918591	4.75070674744477	4.88671081766223	4.9256057368835	4.61767248890527	4.57586537815979	4.52807762499235	-0.0143968172829378	4.75178105902627	-0.126627316168141	0.900780297182219	0.927294002960737	-8.12736566225762
ENSG00000066557	4.83938436880587	4.75300680154457	4.72508854295314	4.38098687008839	4.74720292075408	4.58816327165194	4.47829706385716	5.11252724977264	5.170924896343	5.33123767387398	4.97970447190135	5.1610604138785	4.92498375056058	5.36211536034074	-0.502055448831067	4.896763118309	-5.41814797969671	5.2871019592538e-05	0.000293564406688312	0.840141313013996
ENSG00000066583	5.07297887028639	5.03044260398881	4.82308017376867	4.91076897534332	5.01904923957224	4.77464868269651	4.53949506883247	5.36529481902677	5.25403321217638	4.91264221467514	5.21147140467636	5.35841771944454	4.92553563724239	5.32973422480416	-0.31507705805449	5.03768520332387	-2.79186730543932	0.012865049142959	0.0280660536151557	-4.42780188607905
ENSG00000066629	3.29383584835041	3.41887292799669	3.28426862687253	3.46123808067521	3.32711467865622	3.10211260359393	3.37402662175466	2.5247793476785	2.22678629579856	2.75082026322449	3.00976704759659	2.50648263164506	3.57824924777343	2.67692873868803	0.564758158067965	3.03823449716459	3.59646076952252	0.00234812345350588	0.00671330011866656	-2.88115440591881
ENSG00000066651	3.95648974302033	3.53746251287059	3.80689162670547	4.02666629700385	4.13738482689885	3.98625115061751	3.60084244973961	4.70101118780417	4.75657705969418	4.66701393576552	4.48377527087525	4.75351951610573	4.28365496375732	4.44011130598807	-0.723056553461656	4.22411798906046	-6.35743477891145	8.60844371837498e-06	6.85241128164433e-05	2.87869734059763
ENSG00000066654	5.41364432549452	5.21157653535627	5.08590515852149	5.23936636487079	4.91245678347971	4.92293219047815	5.33591285588791	4.69058782076509	4.56653652364214	4.00503282806985	5.0108935030519	4.9340788960056	5.10877111478225	5.37254643255072	0.345937626827439	4.98644580949689	2.09958900535409	0.051631940313384	0.0901984133133625	-5.83822890851684
ENSG00000066697	4.50359782855101	4.60756472526434	4.64909833599428	4.29248605319184	4.4982298439895	4.33456188050789	4.41573955186984	4.3239083652986	4.03856216375752	3.98825740052787	4.38007504142888	4.19342221185606	4.73234674342927	4.35513716447493	0.178324428178796	4.37949909358156	1.41356210463883	0.176256358614335	0.250961176964796	-6.59634111924431
ENSG00000066735	5.79845131763729	5.58728529524227	5.13594607978697	4.74403988951794	5.29096463573822	5.21796112643733	5.0069457695134	4.08722792711062	3.8727595042018	3.94497155051849	4.45455238235298	3.88014111745272	4.35714614905232	4.45261363597999	1.10781984866056	4.70221474146731	7.26584714172299	1.66681116438754e-06	1.88251646309429e-05	4.34476241059186
ENSG00000066739	2.3189148128778	2.00292754813451	1.99729109066849	1.89443204538787	1.90622280708206	2.04839639847492	2.07895858466514	2.4338431451329	2.53266833269974	2.50994209267025	2.33859845760351	2.51157301529751	2.73694798734092	2.62063524353226	-0.49117474998156	2.28081082582628	-5.82315956870411	2.38281274414585e-05	0.000152959988971514	1.72108809649382
ENSG00000066777	4.58926145214855	4.17865809272652	4.05095686285483	3.84379327951115	3.96174272499292	3.77808065487759	4.10333998896162	4.63447094311684	4.67848556549588	4.46587309410838	4.88723181844655	5.18655996825872	5.10574975478868	5.13184424469662	-0.798384851571916	4.47114631749892	-5.8883418702135	2.10016096874777e-05	0.000138242613037475	1.69061338746269
ENSG00000066827	1.71774334336542	1.6708614645867	1.43218740361682	1.53297785633755	1.49281817610473	1.31790874841111	1.55481376201193	0.445632146938885	0.82680449784091	0.226776132274787	1.01860738835768	1.08386666817013	1.32991063762113	3.47288240386071	0.350296038742483	1.36598504496418	1.01514292868376	0.324832430525522	0.415418252802998	-7.05227462015549
ENSG00000066855	4.90015005645828	4.83569486588288	5.07854464616736	4.00302787142499	4.84088776337532	4.63703818616142	4.78587470890696	4.24739429679043	4.42062882723027	4.09910823172303	4.12046639718826	4.3880422023761	3.81912623364154	4.06108945390612	0.561649891230076	4.44550526723093	3.91714253659112	0.00118542142240853	0.00378979882640771	-2.29893434857398
ENSG00000066923	-1.01308640967035	-0.759198350245546	-0.277889702443964	0.239408202356252	-0.568094257028038	-0.210346178259927	0.182379101275983	0.645550098660452	0.589891524865235	0.547060314999111	-0.00652622510712275	0.342127512000687	-1.08102905829266	-0.131351161604869	-0.470964481929304	-0.107221756321054	-1.61796306546541	0.124806936092346	0.18837118293402	-5.87174344364891
ENSG00000066926	4.87184906042086	5.02865967624238	4.95344722802921	4.78476024818531	4.75015135746264	4.23978838790936	4.61757643150455	4.55117544006001	4.19538951326362	3.89773868218535	5.12964253493835	4.99080943685479	5.14311379819568	4.79412539939282	0.0675707810644273	4.71058765676035	0.355870559242465	0.72648982797172	0.788699286080082	-7.77000090907317
ENSG00000066933	2.14301634896913	2.07659132171006	2.00820524408663	1.81419412823216	1.84922510246842	1.81996846319546	1.76812163886197	1.95745362949673	2.07255253782651	1.76474897125296	1.9139227032817	2.45256825667795	2.18862748378904	2.26565266574366	-0.164744749080493	2.00677489254231	-1.51158879528707	0.149733901391357	0.218960869137836	-6.80384295433373
ENSG00000067057	5.69049411685308	5.98001616095423	6.70519362370008	6.57732145590744	6.25562165042444	6.88513361523945	6.68550019492799	6.93805917779719	6.8848206172615	7.1240519985343	6.96978228104046	6.71904802742442	7.12265711796888	6.71614428851099	-0.526882077305638	6.66098888046746	-3.3350366396178	0.00409835824227407	0.0106972159911468	-3.66859090926482
ENSG00000067064	3.81962427858874	2.5750557519189	3.7183146160019	1.60096474846592	2.67419936166628	1.99082348243227	2.64295813526707	3.52015844431321	3.60362590043228	2.90920608586231	3.16421651436684	3.5922023493199	4.23477728250009	4.42915119765323	-0.930854548463912	3.17680558205635	-2.86698716771843	0.0110027788517409	0.0245310169270084	-3.94309337733767
ENSG00000067082	3.24543709976684	3.00359081158661	2.89052999252107	2.69796985210933	2.88316793226242	2.51120056968043	2.7347966192339	2.18610453987494	2.49459693510951	2.36083043209902	2.73235240589191	2.70089336555706	3.77101535019645	3.25574020842242	0.0618416513468549	2.81915900816514	0.29142630993834	0.774391917641627	0.827273240552641	-7.69859709286177
ENSG00000067113	4.44123479415985	3.56435521892332	3.99232497515983	4.50937167147237	4.18296142606078	3.93258016501529	4.18873203386489	4.2602889045339	3.97637425248329	5.06944552292781	3.48142188521091	4.0393639243168	3.90173108411464	3.37097511043519	0.085801512206344	4.06508292633421	0.389637822886122	0.701835366792902	0.768514462369447	-7.59668713631796
ENSG00000067141	4.80287415202285	4.84590148812568	4.67963104896595	4.75608268703266	4.9605229618728	4.82705729253363	4.92563379546244	4.47650442456606	4.46362850605635	4.57027262100848	5.03412786092537	4.90933674305365	5.04553548743016	4.71870407758312	0.082887336546583	4.78684379618851	0.825119861818464	0.421185321725053	0.512983743692147	-7.80555067799352
ENSG00000067167	5.4258392719049	5.14336703973463	5.33152175590313	5.18324867046008	5.17116194248166	4.91950052950059	5.24204248263083	5.15168753999402	5.15358764245054	4.98921494213151	5.26963466485482	5.29378620684443	5.78034750652925	5.35129506441774	-0.0848958300034379	5.24330251855987	-0.778276633579541	0.447528580141837	0.539133955152558	-7.81837073166915
ENSG00000067177	0.639803045780152	0.701263948142112	0.824172511540454	0.31808784169752	-0.0441317611230356	0.0415580645394458	0.802521563702392	3.20188076563413	2.98848606298985	2.95813779218279	2.96159454806219	3.27844104164001	3.23993800433278	3.03816580921342	-2.6333935269716	1.78213708845244	-17.6105424301429	4.69651590614607e-12	1.19086031445216e-09	17.9868099584207
ENSG00000067182	5.49749974457614	5.27333524162027	5.05124284295792	5.10262240475875	5.06651387148022	4.99708013727073	5.06843475955124	4.82854909711528	4.80690161925331	4.79304281097798	4.77916307979344	4.84404682493992	5.05213635462765	5.10178242607647	0.263630365650148	5.01873937249995	2.92248689770073	0.00979767505500298	0.0223435456425785	-4.40293799063571
ENSG00000067191	3.14135825295405	3.16945399151961	3.02972881316312	2.70903755169504	2.76621830935056	3.00591270664976	2.71278944747816	2.30992795950008	2.12652710841721	2.0691975754994	1.86207473595853	1.58821727059864	2.38142982447087	2.16432365932331	0.861445125200497	2.5025855147556	6.55111851523739	6.00887695120716e-06	5.11069471510429e-05	3.37506494527442
ENSG00000067208	1.26262370148854	1.05914680533071	0.960275955329498	0.671737056548052	1.09392137985081	0.96219032937161	1.08688168504207	1.63524329372585	1.44095242261663	1.50129223459303	1.34209021308896	1.74079469003179	1.18513683683071	1.52899208803679	-0.46986976528229	1.24794847799179	-4.08325162217809	0.000832905554028351	0.0028371938141839	-1.62042338847723
ENSG00000067221	0.696543088144744	1.80147276757417	1.70327152623442	1.48790874708094	1.6307005112308	1.74355117197352	1.5734740959586	1.93934542730155	2.07036461575452	2.22610539933508	1.18847023865593	1.65184021425758	0.574850711762269	1.58756622378874	-0.0768279123046125	1.56253319564663	-0.308902977634963	0.761298623347413	0.816654816213764	-7.33674760571602
ENSG00000067225	3.67738457423947	4.29369250487056	3.90426846040688	3.8469244198913	3.4145235164878	4.50473584328137	4.00371291563256	4.58295910876363	4.86365362554742	4.72436899815154	4.18460651814309	3.79741239326804	4.98290611505612	4.74596086504969	-0.593107167559283	4.25193641848496	-2.83758125547727	0.0116983801129032	0.0258686381457386	-4.006197556825
ENSG00000067248	5.18420869010186	4.83451555404071	5.06100418648358	4.75624010417838	5.04711765714187	4.63436556849785	5.13599272687941	4.99554677507379	4.98405515292339	5.09229715582981	5.19221137336822	4.76479127034404	5.35038336105554	5.34427726525657	-0.153705504538224	5.02692906008393	-1.40025199821033	0.180137350634617	0.255381676712163	-7.12319669012514
ENSG00000067334	5.59143494987709	5.55111789654179	5.93427165361344	5.87990755779079	5.9174080919959	5.84278397517955	5.87354429040706	6.06107085316391	6.14148257017507	6.12342279075597	5.65242510570444	5.41685744077292	5.69541821241709	5.74781228567298	-0.0373165105291253	5.81635411957629	-0.306774164906615	0.762889599929065	0.817568840427634	-7.87314104037602
ENSG00000067365	4.34766193997029	5.81117140990768	4.85227050307588	5.90322987677272	5.16676484966048	5.98303650045109	4.93266277228209	5.3304354139396	5.41568288141967	5.2347227659957	5.28909962635266	5.20329669961192	4.49099428226849	5.01702834159241	0.15789999947192	5.21271841880719	0.667215342172975	0.513946376106265	0.60384606077704	-7.73371548565353
ENSG00000067369	5.2861007188642	5.06372711262091	4.77107520101322	4.61816993495932	4.86066639015281	4.68395127873373	4.71004092081113	3.99265699155003	3.88463925196133	3.96900359997094	4.34361575427406	4.37101927915847	4.8305411392621	4.77339190266589	0.547153456360692	4.58275710542844	3.54822643937409	0.00260252750675797	0.00731701600479354	-3.2112352647308
ENSG00000067533	3.94771669082233	3.53900103335305	3.87313116459347	3.65792000443037	3.74931799643297	3.74017724948185	3.8474310288385	3.83858041556633	3.71227559803741	3.57422581045911	3.64062172595999	3.41997602222636	3.83459595801339	3.76271228944745	0.0796842065877565	3.72412021340447	0.935070575097406	0.363364509006299	0.455365469431184	-7.6358142514691
ENSG00000067560	8.47777996491672	8.59634477552029	8.54855144904374	8.59997591399719	8.58172011466737	8.53598306918417	8.56394526092159	8.52482817277328	8.63015854645826	8.63302392131482	8.5644060718594	8.66489165690029	8.30860733932531	8.43027964697652	0.0214198873609828	8.54717827884707	0.33818491621858	0.739529510567559	0.799503790470577	-8.1711862290209
ENSG00000067596	5.09680006752723	5.11648700787626	4.73229639762897	5.00126747381216	4.97587438793084	4.89849805954103	5.0798488736306	4.66937203785295	4.58602006252818	4.27217143554126	5.15364765056114	4.89380353303353	5.1788384868543	5.22649307501109	0.13206651155562	4.92010132495211	0.984719885289178	0.339117266271201	0.430116324279574	-7.61143738542863
ENSG00000067606	3.74530958009735	3.8267298366177	3.95120022173326	3.77748389394708	3.71131307460352	4.27934424669934	3.8362525613737	4.20567052970872	4.30276320726176	4.73723963815447	4.04012485413667	4.29589259572921	4.09936830558705	3.90775295999627	-0.345788129811604	4.05117467897472	-2.8280591993113	0.0119326222109948	0.0263006057461096	-4.53394154041631
ENSG00000067704	6.62004743131165	6.24196392133835	6.18992797223987	6.26657484341118	6.02250640138204	6.08349989705937	6.29497063481848	6.40165794005437	6.25784176674434	6.35670952629183	6.29052407934325	6.39800413950458	6.35920921860881	6.61064593858446	-0.13644432715752	6.31386312219233	-1.57333697946698	0.13479964989117	0.201158231832446	-6.95668188895892
ENSG00000067715	4.50833662047931	4.06028284077889	4.35357625640665	4.22274554868795	4.11644048981202	4.12043471414282	4.2195899458192	4.20683100510249	3.80595462813013	3.7379445993745	4.18859685766679	3.81330027326901	4.47322726237518	4.00008417202132	0.191471898685287	4.13052465814759	1.66471817098471	0.115021937870097	0.176158551128345	-6.69777097025468
ENSG00000067798	-4.65268284940437	-5.23128997251859	-5.3895299973957	-6.45009900634425	-4.62301799385854	-5.87982252273589	-8.24868278841504	-1.77645228728296	-1.8694076917067	-1.77325566512457	-0.799208897793395	-1.06321411265187	1.71148737239887	-0.927247678461959	-4.87276206447212	-3.35517314937821	-6.11487910906926	1.36015263500646e-05	9.84795819194746e-05	3.25552110302118
ENSG00000067829	4.14862686521303	4.54160724541282	4.56094976234408	4.69659663233463	4.53866977406497	4.42170682715712	4.27420907323798	4.77096204279212	4.62388818675121	4.80116288294062	4.8963944816282	4.5418683176978	4.681774708916	4.71342368160419	-0.262329056295592	4.58656003443534	-2.73339352338587	0.0145220048208173	0.0310955877329639	-4.61494136797335
ENSG00000067836	5.9834978329485	6.05288874241722	6.17147871488987	6.03545964686892	5.98949867891785	6.35660785105978	6.09272138675985	5.10470733812405	5.53913981318145	5.39589384622787	5.38548317165736	4.66589144895812	5.28841437654601	5.15010765379359	0.889962743799694	5.65798503588217	7.51220753428414	1.08860161372529e-06	1.35197655516842e-05	5.03123493499098
ENSG00000067840	6.28815288288345	6.40874639504973	6.28368041756949	6.88627354227661	5.41546866784449	6.69727808960754	6.72476792294624	7.57078731777225	7.58246537793226	7.71341463749321	7.4091862471397	6.77666796904216	7.26681316188907	7.29262430253402	-0.982884925337358	6.87973763799859	-5.15240925268462	9.01935025843051e-05	0.000454176714916664	0.184671169404886
ENSG00000067900	4.87319191582175	4.80328598713942	4.44043830046396	4.47198031001183	4.64236301032509	4.34668928977253	4.51853776888431	4.90023628893522	4.8676986931853	4.62592573097212	5.23451438184622	5.42251210338489	5.30821552593671	5.31046211462974	-0.511919075109439	4.84043224437922	-4.0270863282345	0.000938348296376102	0.0031220987192984	-2.1477804295798
ENSG00000067955	4.02458777520526	4.17813248880838	3.86125713012982	3.9070968620314	3.87112067316038	4.10972646954807	4.27089163174507	4.61943369581114	4.58133358617975	5.18113457664696	4.45407214609	4.77672682107473	4.59118975386355	4.47653255863449	-0.633919771475184	4.3502311549235	-5.57339549412985	3.8856016851925e-05	0.000227473102984502	1.23857219974178
ENSG00000067992	3.37093340003817	3.091489583744	3.34248579241986	3.56507413109636	3.22089344712865	3.56093920391316	3.4279786603703	4.00369719086229	3.75223145630292	4.134217361464	3.00059926087565	3.74178217356423	2.59447694010404	3.68515881297203	-0.187179237363284	3.46371124391826	-0.884404569788477	0.389304686572676	0.481089859692668	-7.24158838446302
ENSG00000068001	4.41510380998451	4.62312104754294	4.68813226294886	4.76643279220113	4.77307048934878	4.74350510229846	4.72956425355755	4.49299265157527	4.24391168337824	4.47592100258165	4.3668821945942	4.1981106883244	4.09538972997159	4.08378363326109	0.397012566005858	4.47828009582633	4.60616394220233	0.000277222909710157	0.00114172255431101	-0.884070608640202
ENSG00000068024	1.98929938269115	2.03059787722335	1.65513595351346	1.1699169628893	1.34580250003122	1.11813426146936	1.43864544268991	1.30666909869698	1.85024471586364	1.06639268836302	1.81275253595693	2.00862909591177	1.96342283547786	2.25642889306356	-0.212908104742684	1.64371944598868	-1.08391399340943	0.294136055547183	0.382634665676012	-7.13191716684247
ENSG00000068028	2.3599666515077	2.25250355577021	2.49413832807473	2.38371478687528	2.27306161474108	2.44489255344457	2.4626992075493	2.55896362805322	2.81550978267459	2.74730645098106	2.29102626455333	2.60565234362909	2.96467566374463	2.38613999614782	-0.249080683995299	2.50287505912476	-2.20362133404102	0.0422187959498169	0.0762947239057492	-5.47923536595096
ENSG00000068078	3.30571480064367	2.82360224575132	2.73193829464929	2.53532349424517	2.79111380874833	3.76286130322266	3.42046074763686	2.69994338192955	2.82763054048899	4.40844986486757	3.17184674188032	3.24529201256306	3.76619224348637	2.24462871116929	-0.129062844617987	3.12392844223446	-0.455051948864904	0.655059000329954	0.729635132517239	-7.67483646325077
ENSG00000068079	1.7697304953255	1.57204224121051	1.29443232957237	1.4381105130609	2.29692563157279	1.53401431078179	2.30909168007924	0.753938633835755	0.895122807834484	0.684686025590633	0.807816223889122	0.815015790759074	1.20626406743086	1.82871320832657	0.742477242428928	1.37185028280497	3.263170785502	0.00477449462143077	0.0121500515245977	-2.84114128995687
ENSG00000068120	5.15221237423212	5.03453863099367	5.02004406029116	5.28399952874402	5.15299923336683	5.44901269999377	5.20673562072374	6.12902788542502	6.20346940833343	5.94405286397973	6.00164396952108	5.8439746082216	5.8019932122425	5.90475410579862	-0.7884451973563	5.58060415727623	-9.19493862031583	7.2951357460488e-08	1.6752659842483e-06	7.63572638630873
ENSG00000068137	1.26842808445478	1.59913497563516	2.09254538677143	2.70359544425063	1.37212682146629	2.38184148199506	1.43600912550811	3.51484646058808	3.7670978834205	3.93118524677911	3.73787717723572	3.48474535597594	2.65324371290967	2.93164226929424	-1.5777770682298	2.63387995902034	-6.17119594445499	1.22222805978099e-05	9.09274921491104e-05	2.76003624747321
ENSG00000068305	2.67520238633328	2.91158730344941	2.77352723500733	2.7550668724215	2.98313620983406	2.81516787665086	2.93877467584051	2.8345762443209	2.72077128329392	2.73035122535036	3.1514443231091	2.9017462234839	3.09286552436736	2.64547628007359	-0.0349468749002697	2.85212097596686	-0.36205242886944	0.721952044531926	0.784963224405759	-7.81174715061881
ENSG00000068308	5.67985545019199	5.96441077273879	5.89142710432157	6.03445277889222	5.87965539498499	6.0536444707412	5.85132854924402	5.45124594456951	5.35497335251322	5.65895867523165	5.45311064568925	5.24177286796947	5.20395182360576	4.98144132131296	0.573551003967186	5.62144493942904	6.04768535230221	1.54609191330051e-05	0.000108583292999311	2.0352664019861
ENSG00000068323	5.27741102127128	5.3202036111326	5.56639276085332	5.09952838869827	5.28287858108379	5.39342588187622	5.12071611218206	5.89318935289853	5.85759295405642	6.81401551995801	5.56604473828981	5.78353682265759	6.01187623345799	5.58673236170061	-0.634852020504161	5.61239602429404	-4.0504489480534	0.000892940392628303	0.00299475820299782	-2.10116190124179
ENSG00000068354	3.38348129201001	3.72883560882314	3.53849652817175	3.41122908489974	3.14917355923269	3.36102843546954	3.3622527744723	2.31823908333791	1.89013931003426	2.11471663551798	2.28478076426366	2.56134051256906	2.9844377473243	2.72563011506412	1.00438171869781	2.91527010365646	5.97641257921631	1.77235167764174e-05	0.000121528407146916	2.59920149743112
ENSG00000068366	4.94410170683494	4.58413788483075	4.69325218324707	4.1755130671405	4.77759719668395	4.16033657168352	4.52364457519766	5.1517636629063	4.67760892702011	4.99177996832559	4.5888625682743	4.89138744415024	4.86108288708904	5.44144846101891	-0.394567399424113	4.74732265031449	-2.77116960976034	0.0134295402226746	0.0291148795956845	-4.80460027505401
ENSG00000068383	4.0728962211167	3.92224446350003	3.8725625108671	4.06322293004434	3.9808489001045	4.20570036262912	3.95905543323557	3.67642083717351	3.52042146857618	3.78546494370073	3.93640005730776	3.73393429277756	4.05248533684983	3.70419744660772	0.239757809429987	3.89184680032076	2.59108377013206	0.0194560199396786	0.0398651883309476	-4.93074629400792
ENSG00000068394	4.06634719793926	4.44145859385489	4.32016030307727	4.52403844944551	4.30938353452965	4.47535958277188	4.33050484647797	4.63837895349775	4.77808601365483	4.62756730170186	4.56208797257146	4.36965868815561	4.59495952927391	4.77533607691604	-0.263981141636522	4.48666621741913	-2.42439988386701	0.0272695602102297	0.0527759544238334	-4.94108868382125
ENSG00000068400	3.93502083227462	4.01265554390841	4.069457622953	4.04221606253101	3.78330168793669	3.98799739547906	4.08998847639891	4.47164310008804	4.49164295864836	5.18522981595463	4.39362919501177	4.38575504359106	4.50807184003635	4.48505667323822	-0.565562538442991	4.27440473200358	-4.62931856162323	0.000264175190671139	0.00109923974210545	-0.554245604031716
ENSG00000068438	4.56213299670574	4.6354797642264	4.72894009167353	4.85724960658617	4.74445222407475	4.70643094101743	4.80539492207347	5.06762855138822	4.97411975781681	4.56832675213751	5.23366766145976	4.79243057118546	5.02685611970419	5.01814590985433	-0.236381945495095	4.83723256213598	-2.13626183612387	0.0481134540428625	0.0852261459984979	-5.54350462771597
ENSG00000068489	5.4599381646365	5.68747101566169	5.62995116810905	5.28362222917222	5.36011578382188	5.27198026523802	5.34264427544385	5.61046614405685	5.80493621937648	5.12059221634585	6.04552627878705	6.00239541630176	5.97447931187928	6.05160818316091	-0.366760896728866	5.61755190514224	-2.66781688096393	0.0166246121447332	0.0348738632219144	-4.84180253738235
ENSG00000068615	-1.12391658169815	-1.91583677898741	-1.41264106917766	-1.92476063929325	-1.00369237704133	-1.2279076495082	-0.945069470984465	-1.12058639160203	-0.709748389871249	-1.9029336477827	-1.24486810994957	-1.0146751078934	-0.531939077170012	-1.04641069171097	-0.297264665892264	-1.22321328447646	-1.23878404203498	0.232924291086533	0.315482032808168	-6.3280476844162
ENSG00000068650	3.66439184948598	3.51050358929406	3.32365408192581	3.05399043917076	3.50034668846291	2.52723445642187	3.29017001194735	3.01294247408073	2.81825750340582	2.62835280998558	4.01356169270666	4.22200040194763	4.0518777487133	4.21162082246534	-0.305141523926021	3.41635032642956	-1.11765934100332	0.279874623259511	0.36720042696551	-7.30697169424302
ENSG00000068654	5.40542526426674	4.78479664729333	4.91744258577934	4.46944732183412	4.76595069170828	4.43439509701502	4.75709675555273	3.55472871546006	3.59893563032519	4.09721991150101	4.3264058566169	4.43393532506206	5.27683712813876	4.90872607528948	0.477448729568326	4.55223878613164	2.02023336835607	0.0600631818717216	0.102215042114162	-6.19497271713406
ENSG00000068697	7.70236394779119	7.86996613591502	7.81723671736902	8.02362184342382	7.81549080569053	7.85384799071868	7.84366894503961	8.09901502754104	8.0836993364301	8.03189017177276	7.89808805161992	7.7642562977812	7.70291317360122	7.6308831696743	-0.0409738026831254	7.86692440102632	-0.490031224219411	0.630625405742544	0.708318735076828	-8.08069110213245
ENSG00000068724	3.55817119935741	3.76614728511745	3.50400444876418	3.58742990707818	3.59939072073686	3.76235198131397	3.5638694734007	2.93328186485577	3.30962599397382	3.03181073236092	3.41222925763855	3.17024416882881	3.11815491744011	3.10858372245269	0.472147181594526	3.38752111952282	5.51769044238855	4.3381111201496e-05	0.000248232959301085	1.1325073004787
ENSG00000068745	5.03437214439749	5.32813049501751	5.34306852145202	5.3881635038637	5.19993684833979	5.5607421595659	5.3767902777989	4.91825956340749	5.48626781205708	5.36390385161405	5.11807714606271	5.10416607171946	4.86504541100888	4.8678324444963	0.219385780455514	5.21105401791438	2.02329282585127	0.0597162335692773	0.101822118068321	-6.1804459672556
ENSG00000068784	4.15302147225315	4.09414367664206	3.98142939474782	4.02268334044413	4.1583573362855	3.81513543234132	4.10483761434461	3.48500470477003	3.54782651128558	3.31082821090787	3.52802290074332	4.0745387646127	3.92909998307931	4.0704740635812	0.335625575715289	3.87681452900276	2.77494080134865	0.0133249370788715	0.0289138543745668	-4.66443411035535
ENSG00000068793	5.78105398794109	5.97539516796211	5.40787600762147	5.46744118149092	5.68953083215399	5.53007716864435	5.55516086824829	5.64602359148542	5.67479387887298	5.79152022735123	5.30810865474571	5.93805485504481	6.34099201100638	5.63196294348139	-0.134495115445755	5.69557081257501	-1.02352372420788	0.320973576714316	0.411521057852095	-7.63528559373789
ENSG00000068796	5.57881419499751	5.21276386019699	5.08116762574976	4.85548050427777	5.04001849394545	4.51765462001501	4.92025246057659	4.69963934798662	4.8174192000301	4.49911126128236	4.99256253375747	5.07065947405128	5.27269041236665	5.20183050491217	0.0910009608648465	4.98286174958184	0.612405598745464	0.548696820306505	0.635957432620748	-7.93315300244366
ENSG00000068831	3.62782209863951	3.69419765789417	3.12339925720923	3.52289683324098	3.22458847482793	3.81584482724253	3.06132646039916	2.85395261848055	2.98422384049691	3.49364663374301	2.82764787849013	2.50005182893342	2.09904004364259	2.88915155569774	0.650713818271619	3.1226992863527	3.6325130622642	0.00217433096426014	0.00629790151499529	-2.8332362266931
ENSG00000068878	5.70946111213294	5.43347245927198	5.3946973743502	5.47382644132664	5.44280582042532	5.37118259577468	5.431764629198	5.42714194517071	5.65049833626591	5.32036553685107	5.76608743793384	5.68480964112784	5.9146817934117	5.67084358773582	-0.168555325181964	5.54940276506976	-1.90344047321617	0.0747479880068595	0.122542801997776	-6.45967414822555
ENSG00000068885	1.9656488995178	1.68729046163606	1.6449787919329	1.53322105412397	1.61046851544389	1.64142264129877	1.90013157884516	2.26394112215843	2.27275634906517	2.62996979212385	2.27361591379987	2.33414306839608	2.25087956452505	2.62892340274226	-0.661169413032572	2.04552793968638	-6.18195145228355	1.19758173474152e-05	8.93122995927639e-05	2.6785444149146
ENSG00000068903	1.48172129362143	1.27524433463927	1.86884347355128	1.58157958999864	1.54053806142651	1.89740115374751	1.52096788020693	1.63301927340148	1.36944070556898	1.75803403955831	1.08339313917953	1.67028798800149	1.14566228424602	1.47258397558685	0.148678277820897	1.52133694233816	1.02124346352079	0.322020243232272	0.412515354213239	-6.97642167022807
ENSG00000068912	4.63192342378485	4.6402587802877	4.55527246737516	4.69012800954859	4.68361221200245	4.60494265328854	4.63603799380304	5.03753249441015	4.8723786505221	5.08476656137876	4.92310985114305	4.97051729717712	4.96207432803843	4.83200930853644	-0.322339757292621	4.79461171652117	-4.88240791559446	0.000156498128235007	0.000717415713276184	-0.215299193577925
ENSG00000068971	1.6437547315932	1.76944569655821	1.87881339597989	2.33730742860551	1.49846766459973	2.02190583323955	2.1874168017652	2.06982832868739	2.08862543511516	2.33718580272595	2.23267912046511	1.62140428426844	2.41921283287849	1.55029873297183	-0.140459998331138	1.97545329210383	-0.809449891181544	0.429885134892972	0.521440300656005	-7.15929621076548
ENSG00000068976	3.32548476585917	2.71921631573316	2.72114223154075	2.65082782142174	2.75336875790832	3.07938887863232	2.64146293858435	2.2277693888591	1.88385892329181	2.63824829925563	2.46942409816338	1.83633673944784	1.74684388290636	2.01585711091319	0.739413893075993	2.47923072517979	4.70465963578783	0.000225900368093641	0.00096538049750476	-0.296162393464769
ENSG00000069020	-0.13114150224862	-0.0537336401097241	-0.143940789713043	-0.166794706482983	-0.287940122762249	-0.535490744155993	-0.562966476024266	-1.29309932934651	-0.956337673521739	-1.0490501867769	-0.476769300027129	-0.559694545241917	0.94852371354726	-0.746783653856239	0.309400789111325	-0.429658496908575	1.11882330588362	0.279392028862356	0.366707687186858	-6.64030117937399
ENSG00000069188	1.475664271105	2.05518970296839	1.14619612371628	1.37370401635393	1.81379962468199	1.50830787300165	1.61631574066837	-0.0425352318848269	0.0539184491723979	1.25762439173914	0.519486343515076	1.5163569358399	-0.33129112901829	0.329135950033435	1.11228272644551	1.02084807584946	4.50593764429097	0.000341740744218063	0.0013478051192087	-0.647562088072058
ENSG00000069248	6.48466915395197	6.46964187748633	6.45610449117591	6.32716461936657	6.45972623056133	6.13917958222658	6.42639387635241	5.27279585028456	5.31959968578873	4.96734045006136	5.57610041944952	5.60996638015674	5.51489045969024	5.75207575113342	0.964088932968068	5.91254634483469	9.19872886289233	7.25365104354804e-08	1.66888822024619e-06	7.57933197704647
ENSG00000069275	7.65181044589923	7.73007138058152	7.66716126320247	7.49897695249562	7.66519500384948	7.54993445575768	7.72579003748821	8.03241136888857	8.00678631986851	7.95129553307642	8.07154614900479	8.29727257330248	7.47966876064362	7.89411110099677	-0.320230159325987	7.80157366750395	-3.31602696302169	0.00426739290096914	0.0110577898653812	-3.80293010980263
ENSG00000069329	6.08379158664345	6.08923211087405	6.26435866192386	6.34304495606305	6.24307975000283	6.122759252691	6.24392289532234	5.93892668839659	6.05754493188759	6.17951293359344	5.66852154427071	5.99491815932249	6.00998392884461	6.20619863500179	0.189038588577636	6.10327114534556	2.23063966218045	0.040047707979454	0.0729671637451998	-5.75356365434976
ENSG00000069345	6.98617817678584	6.80418351960448	7.01186255629031	6.95314316885665	6.95974347252154	6.82484003834097	6.90952854652132	7.09958909148564	6.84265857288501	6.72338608935546	6.95042830824866	6.86187000730975	6.8863874444217	7.03582743547628	0.00548696777438806	6.91783045915026	0.0781916059170387	0.938625048194718	0.954705453917593	-8.1233275044341
ENSG00000069399	0.472238782702694	0.338917872769149	0.902287540406916	1.2186899907468	0.681047321846911	1.65749241372654	0.802873963589393	0.382034589550387	1.43043749794029	2.02335344194082	0.626341791297229	0.910964328974012	0.180319046076955	0.309203120554068	0.0532457220806212	0.852585835865868	0.184415419328172	0.855956643408521	0.892473940454477	-7.26967577440289
ENSG00000069424	0.759479334141917	0.690145874068636	1.65606395496824	2.36874343932631	1.13800154394547	1.10139111123365	0.830667728266892	0.927907360073498	1.22018033984986	1.58179775506479	1.57615436897735	1.12220367956271	0.425683416740806	0.970616207270414	0.1114837331123	1.16921686524932	0.436623806539994	0.668098156091211	0.73969095404222	-7.31672783501616
ENSG00000069482	6.40181683944216	5.72964196854018	6.59609071430424	7.82264524056214	5.83435572975954	6.36883304328367	6.3525781375144	7.82371417433169	7.76929813348769	9.31312266407007	7.85528562812242	6.82874402736739	8.46698606238128	7.15207528408083	-1.44639860822357	7.16537054623198	-3.89131239506947	0.00125241766999749	0.00396854346824772	-2.145545861282
ENSG00000069493	0.236163581588792	0.233566614455038	0.266328790798376	-0.0925159747012317	-0.0919760878285151	0.576651913691251	0.147486607326826	1.07859985865607	1.25717349816939	1.32008244265275	0.7174037124624	1.00898597048434	-1.50863557953626	-0.413621758969413	-0.292013035336155	0.338263827803557	-0.740225806483392	0.469665007689913	0.560805730265274	-6.85116977418886
ENSG00000069509	4.04163064607876	4.35282473241539	4.06155720632186	4.29210458451113	4.12287507491532	4.13143370453988	4.07854487436392	4.01736954519488	3.85814227327249	4.6185484490415	3.46204879058071	3.4674088739921	3.61548315458789	3.70273685093066	0.336082590699246	3.98733634005332	2.05890964033058	0.0558089298596242	0.0963475865704236	-5.50406089766278
ENSG00000069535	2.37481424586131	2.36719303907207	2.70778014329202	2.35415656344454	2.48934209710469	2.6684291188192	2.34925919390836	1.02990730772573	1.19809463334114	2.92198231137099	0.487893198896139	0.430241182924068	0.159960782872717	0.030096385753503	1.59154303866967	1.68351072888475	5.25615237780314	7.31442219191411e-05	0.000381748852906461	1.06973245761425
ENSG00000069667	-0.242889700188775	-0.64528198250566	-0.14455745125729	-0.593058485455232	-0.505417386311732	-0.378425386042418	-0.58607221985635	0.106264101919982	-0.060865131716239	0.307352368701173	0.000253877330389063	0.504957061178826	0.48698519286329	-0.0917522769529473	-0.627924863358848	-0.131607672735213	-4.47176827805619	0.00036708054419437	0.00143380529633815	-0.629910650663145
ENSG00000069702	1.91610333495984	0.451913100962333	1.05012365749629	0.138762156263278	0.848755714396417	-0.0619347715356247	0.895484074948889	0.192215195174547	-0.31599962630675	-0.124445519911113	0.399441491701962	0.170316949155991	1.00727149595584	0.572318062150657	0.459743527185615	0.510023236815183	1.64620091531129	0.118815601749399	0.18092139232978	-6.18120697450362
ENSG00000069712	0.682149865505906	0.908912171122876	0.54992271306371	0.826648645180176	0.540968009668765	0.626186325150961	0.986846519951303	0.375584707403185	1.1232859995856	1.0994405191821	0.352062482202721	1.17652711654408	-0.717509756895028	0.389676650586526	0.201220578323977	0.637192997732349	0.801963343853937	0.43408162877452	0.525378630053171	-7.05943759982899
ENSG00000069849	6.28458388154635	6.135703732246	6.38762010774693	6.39063002285731	6.43771340253544	6.35732241903338	6.44888141052136	6.92208368569186	6.87243008701586	6.84342211162081	6.73327259733972	6.79441740606271	6.54348854452631	6.57026897364804	-0.407509695288831	6.55155988445658	-5.05252044807833	0.00011048546104836	0.000536599579576851	0.0753846298562539
ENSG00000069869	2.10071286044235	2.12600560185549	1.14199288757247	0.923257278902641	1.08938471745383	0.668016096091607	1.09594447866271	0.788243135984654	0.93858181666265	1.25234475511678	1.04266477715639	1.30613118614959	2.63871328688258	1.5879146488733	-0.0675492746139166	1.33570768055765	-0.230560600156584	0.820517715832535	0.865128108922667	-7.56252811568105
ENSG00000069943	2.64323543060325	2.75920427614032	2.52708895132212	2.7367829632173	3.00459115353979	2.55686182790429	2.53081106123283	2.2795414747908	2.02571963089859	2.34987721674779	2.27306112470507	2.63671976517516	2.16024219042124	1.98295856543835	0.428520410657303	2.46190683086692	3.13321210054522	0.00628804907448171	0.0153555066784745	-3.35349633016195
ENSG00000069966	3.83961992569144	4.2329363769465	4.09615805823449	4.13294891296229	4.02315793739542	4.1434029394173	3.86385298060306	4.09576013467264	3.96869768609175	3.6988306576013	4.30319883178224	4.41859181111275	4.26672687974736	4.07917328889414	-0.0728457402223874	4.08307545865376	-0.633054256720663	0.535457348046836	0.623624101985713	-7.59586885926987
ENSG00000069974	0.981007278969518	1.39029068497242	1.32975723204425	0.999071710125517	1.43176037682461	1.07224824233447	1.09394526156393	1.88274416487166	2.13576709051758	2.0045544346829	1.92548748438648	1.83989303234512	1.79275246301941	1.77194985568947	-0.721596602716977	1.54651637945338	-6.1320546002743	1.31645498427002e-05	9.61650553185191e-05	2.77038769798416
ENSG00000069998	5.71639963202279	5.65861906267178	6.05548609552127	6.04183056050965	5.64250270925048	5.87503593375024	5.99272221073802	6.10261214124278	5.99274828262851	6.02749102636489	5.82003589099934	6.26164441822704	6.01290024549492	6.23349412831079	-0.210784340039385	5.95953730983804	-2.29207821047522	0.0354905387733984	0.0658568908996848	-5.68916583064272
ENSG00000070010	4.96619011509594	4.96833230001927	4.9970958832255	5.29494100443463	5.17079891612447	5.07449887112637	5.00222632503546	5.72733059575305	5.70951366680903	5.66281598089453	5.41791361275455	5.10002878664096	5.80908180156969	5.70582611106054	-0.526267741645526	5.32904242646743	-4.69306515836263	0.000231399587338273	0.000981995947522356	-0.542028260257562
ENSG00000070018	4.33057045662181	3.7558059491355	3.81242825677958	3.54340616442292	3.99328081568639	3.54573453184371	3.90600054062048	3.80952896030685	3.74612347960568	3.49310212069791	4.14186916931929	4.20920462951299	4.21887822224145	4.25992260349371	-0.143377167482339	3.91184685002059	-1.0210384033611	0.322114487541951	0.412592657111459	-7.60495731244917
ENSG00000070019	-6.83471363519942	-4.7653265627304	-2.51558455799341	-1.80276908904613	-4.44984492044117	-1.46600942518234	-1.5814259750951	1.2935642203252	0.877843254532153	1.02957120869183	0.744703121833924	0.224869088474451	0.802973757128894	0.427777007074914	-4.10477959177367	-1.2867408934019	-7.09506636498216	2.25017743839229e-06	2.36706219556375e-05	4.99699882004967
ENSG00000070047	5.28092944827387	5.15177511509939	4.69024889847504	5.17331101857457	5.07325022789778	5.33829660887953	5.27341959227836	4.72024694928692	4.76290022597811	4.67152354683971	4.89191319835568	4.68701063952712	4.85280846176946	4.94129910523177	0.352338456208002	4.96492378831909	3.76094403416411	0.00165339435527676	0.00499713501317941	-2.73377089877099
ENSG00000070061	5.39502215517001	5.22901930382113	4.94605252725141	4.75247757536957	4.99288123124321	5.0950084333914	4.87332447772548	4.46980018757253	4.41015596690752	4.41898928177054	4.54018970218299	4.82946879462043	5.05498876714976	5.28812396451032	0.325624161585615	4.87825016919188	2.30165584768757	0.0348252390300246	0.0648398323748554	-5.70942832844992
ENSG00000070081	2.52307389722609	2.80240463009855	2.59994087340698	2.5513102822252	2.52056768628581	2.54689603941184	2.64625884593766	2.1222632880846	2.36889666844768	2.95460738328396	2.16103492338314	2.11059868606522	2.35948607501165	1.90265502365444	0.319220470269753	2.44071387875163	2.50972479769351	0.0229582804957773	0.0458074150678862	-5.06670617934953
ENSG00000070087	7.04953511088143	7.4185561579575	7.41381703899891	7.45056629246971	7.33637755127081	7.57969091096204	7.34215716735567	7.52272286166092	7.40989197537232	7.29660400894524	7.38604112252627	7.65902068848077	6.67916092351024	6.88834898459729	0.107358392135009	7.31660648535637	0.798728860403827	0.435902665628383	0.527425324919281	-7.8737787691959
ENSG00000070159	0.265024682905781	0.247296237646379	0.198589524001402	-0.012462273807968	-0.0353476801545569	0.161626332828936	0.141160155703632	0.221690564254679	0.643094366578652	1.00172473398558	0.795311769146716	0.926597952997702	0.36780296628788	0.373626483063703	-0.468361347571866	0.378266843959894	-3.2140892293274	0.00529845627204289	0.0132772310658913	-3.27341253999365
ENSG00000070182	-1.71828117857266	-1.4812969214405	-1.59898771300713	-1.3973709787651	-0.811542224301972	-0.688177456082046	-1.19455015469242	-0.293050254802239	0.00939868304395475	0.413798617248767	-0.515373597130298	-0.38436684963769	0.25505590539429	-1.37447788857361	-1.00908868112337	-0.769944429379904	-3.86213031551679	0.00133270727203867	0.00416762081397292	-1.81801329720013
ENSG00000070214	5.26783914744134	5.29932690906656	4.75761683538477	4.45344032451979	4.5801792075552	4.75547623703216	5.03538234877622	4.35110366020109	3.96295729160405	4.14767108276645	4.46213401168839	4.42282807172381	4.38786846544489	4.28848626598559	0.590017723438972	4.58373641851359	4.50433633146242	0.000342887476152099	0.00135145190163445	-1.18608796318163
ENSG00000070269	2.74135069694468	2.45627455292203	2.2511768849062	2.62821853164792	2.56228083570232	2.43404159509587	2.58545743978499	1.87523946361299	2.13862903196859	2.40955810366609	2.00211849874594	2.20649145329714	1.74186534622575	2.27363528995684	0.436634309016253	2.30759555174838	3.86391059243662	0.0013276640129754	0.0041550523789981	-2.23208963402996
ENSG00000070366	4.38417140465442	4.55096127935813	4.46812152221758	4.28448802583528	4.1791155399631	4.34813339942209	4.30917630970012	3.82378852361281	3.8118637880171	4.03911120626572	3.824090129089	3.90197915059034	4.15415259197385	4.161905787363	0.402827719967588	4.16007561843304	4.8912240603417	0.000153687826351176	0.000707737294065448	-0.298515826161369
ENSG00000070367	4.0009228509083	3.85570804416129	3.71811007827187	3.39765177851035	3.65805123896541	3.38302647598903	3.63074520584173	4.15078176196816	3.94738474350971	3.99368334922895	4.10606207047563	4.20522192763273	4.17992170260125	4.06256671873681	-0.431154487711995	3.87784556762866	-4.56665592859346	0.00030102472493025	0.00121800928428393	-0.967896910859506
ENSG00000070371	1.33789108072696	1.87134039785504	1.9946034440793	1.58826110278243	2.03088416061777	2.02978532256652	1.91736325086923	1.94191278364062	2.11232811112612	2.14454928078382	2.29550482322594	2.57863854534113	2.31644118996113	2.18250284248608	-0.396568104750963	2.02442902400443	-3.03520085531084	0.00773275946320817	0.0183389351961626	-3.87183237940345
ENSG00000070413	5.64691366434819	5.63938271854592	5.60035943115252	5.51804546534807	5.41492481330675	5.42730787464917	5.51438185209768	5.04265621286991	5.01377426983193	4.96182041058378	5.34451486280917	4.82049195826075	5.67734980182658	5.3893189765279	0.359159833441684	5.35794587943988	3.17795105497207	0.00572009631006564	0.0141848598593743	-3.99606721454727
ENSG00000070423	6.1501494359276	6.50630214362153	6.79263091764256	6.59113022115432	6.5204718790971	6.99689113111452	6.68969889911192	7.00158857622893	7.12267579314194	7.03219355427555	6.89574107813921	6.26616643036284	6.63293835436886	6.58240107428417	-0.177524959139193	6.69864139203365	-1.23089092820455	0.235785940185538	0.318542643800442	-7.2532356004574
ENSG00000070444	3.14860109065836	3.52736363420095	3.12011221616328	3.07912517435523	3.14766902141583	3.12203408913837	2.86777262612264	2.61169106635995	2.62984822107949	2.58438017444985	2.78497094964843	2.73293866811779	3.20876742941597	2.91455631447983	0.364061229047808	2.96284504825757	2.94146272138537	0.0094158752332132	0.0215901690775128	-4.03225439564514
ENSG00000070476	4.28285445570361	4.26497826137961	4.31179093678068	4.1794997304796	4.03427628470691	4.20281908900009	4.05494884256236	3.3244804274575	3.43107504924487	3.59931420215972	3.67287566954654	3.73118464888691	4.19684159605856	4.26999312172217	0.449262073158402	3.96835230826351	3.32591906588828	0.00417858827672576	0.0108670081017157	-3.44638466658595
ENSG00000070495	2.39321951740229	1.82487707223853	1.88317181452854	1.76362427109424	1.63813569560328	1.74873605148846	1.72343062978959	2.26401979594708	2.07692863762644	2.0673855331994	2.02177536078239	1.9806496171713	2.42776353744639	2.2034675914818	-0.300123859717649	2.0012275089857	-2.48816241950811	0.0239823587803801	0.0475467158683835	-4.96157148265804
ENSG00000070501	4.20822656952524	4.31233712031011	4.35107281494799	4.30210638035925	4.38958853066012	4.3450594980338	4.38446948448792	4.14201854799477	4.24832785179011	4.00880719520191	4.03184008129704	4.01852494975748	3.65935576975592	3.84843197261614	0.334010722779957	4.16072619762413	3.85763242217142	0.00134553516710419	0.0041991047484167	-2.40724111236947
ENSG00000070540	4.04559288605269	3.95750174761686	3.98455634900253	4.19113941215303	4.1620687042558	4.12008846096534	4.21966362911006	4.97475207781413	4.64991204692179	5.25818063893493	4.47854022943012	4.47159845784045	3.53397216581004	3.98667417469929	-0.379932301551475	4.28816007004336	-1.78962722986263	0.0920604734908279	0.146046405481865	-6.28415103211311
ENSG00000070610	5.2767623449583	5.50349592253631	5.17310295439343	5.1451336889465	5.24621432376255	5.37926995761188	5.20365276780769	5.27853657099049	5.21580882505671	5.26413148568008	5.57474466340145	5.6576637142546	5.33850246010572	5.52417851080093	-0.130661491373858	5.34151415645047	-1.52705394529836	0.145869295192928	0.21413281772924	-7.00192704360791
ENSG00000070614	4.93609504997955	4.91820396305835	4.69906343630543	4.62770114983805	4.76430156924863	4.49740745865192	4.66776467572867	4.31685025319689	4.12720557219844	4.09978792389559	4.88791162826519	4.53971215954873	5.28492663687676	4.72005167566217	0.161097643438668	4.64907022517531	1.02804950194541	0.318903398013801	0.409211729807694	-7.61971357337772
ENSG00000070669	6.2257686873973	6.09378112111824	6.14109926901707	6.01472711974498	6.61006589462475	5.92587608220468	5.94821796710174	6.42543987292063	6.76450319767851	6.58259605336898	6.62325201924598	7.13157600893282	7.25498150084505	6.80004526463485	-0.663828366847666	6.46728071848826	-4.98234138596837	0.000127501849378537	0.0006032388979034	-0.153864825015084
ENSG00000070718	4.05326410808571	4.04572385231537	3.83593119331643	3.71632181152889	3.16588474673869	3.52853893020396	3.27421981266017	2.78286823055027	3.10722441072773	3.18534403462668	3.08734450022905	3.10133617216894	3.20261946483858	3.1688950221791	0.579059697929341	3.3753940207264	3.97041259969802	0.00105843392867661	0.00345552557562312	-1.95519589029217
ENSG00000070756	8.04104242296488	7.94060217570474	7.99381329800774	8.15474793533533	7.96139426690289	8.1076639061912	8.00795029593641	8.76126897280753	8.87933527838379	8.78649527577614	8.83007181399006	8.82747982926152	8.59895146239974	8.63470186854959	-0.729822135842266	8.39467991444368	-11.7522145309696	2.184310137412e-09	1.15537717857575e-07	11.1873317972583
ENSG00000070759	2.58800726941312	2.86310695470024	2.79658582215354	2.56311657979013	2.6586430357289	2.79400241891358	2.65273041814278	3.01468556398105	2.91124168342443	2.75666516779135	2.70637637558909	2.73455176003307	1.90831886285889	2.3011141101374	0.0874622078501845	2.66065328733268	0.57250936371401	0.574769578508945	0.659457064482689	-7.56313322221883
ENSG00000070761	5.72365312655833	5.9438268563894	5.91419325327149	6.01829105166808	5.92576783756104	5.95841193368467	5.91342141869899	5.71369512874903	5.85451376636291	5.89174604757448	5.661150373686	5.54592418875895	5.38674842498721	5.27021391345311	0.297022418285276	5.7658255229574	3.06687197838738	0.00723354390734382	0.0173340151400436	-4.09650641701198
ENSG00000070770	5.85726753906883	5.76866450428905	5.55316550077546	5.33714130713455	5.44322074410575	5.32044824010026	5.49799629522583	5.57356038377013	5.82284028588227	5.63537415140317	5.77870889139132	5.66727681663547	5.82615524371035	5.63960869971004	-0.165996911947063	5.62295918594304	-1.7884291982219	0.0922601035460876	0.146344027141852	-6.47872229936263
ENSG00000070778	2.01309551342914	1.95782259056562	1.74909549989347	1.96162741395676	1.70655911022658	1.79991760457997	2.23241683807514	1.83161687974307	1.39998359798216	2.2358036139217	2.66888917235036	2.26254648248833	3.37488714067465	2.18253270897135	-0.365605932630047	2.09834244048988	-1.57314573556478	0.134843889708832	0.201183329369447	-6.60678821628356
ENSG00000070785	4.27567810980299	4.06977199802916	4.23710626065511	4.51947808526999	4.26323623005992	4.18085598217653	4.4068538872891	4.75434335949025	4.81519937974026	4.70924797906841	4.52432467343739	4.67282435018837	4.4918837558819	4.79645511672996	-0.404295088930186	4.47980422627281	-4.70125502331649	0.000227501163411853	0.000969169289424452	-0.577034260524162
ENSG00000070814	6.58022541547829	6.34972055332833	6.40173002331514	6.49706880942264	6.44709080691588	6.52217572842538	6.50725847947699	6.36989253260393	6.50253777699494	6.470143412695	6.29111510441481	6.17758430150174	6.27165004351264	6.31333463537939	0.130138014647639	6.40725197310465	2.02237808221673	0.0598197763830934	0.101955818282962	-6.28566542649138
ENSG00000070882	1.80788667845457	1.35944014721198	1.24976214687285	0.901074097920941	1.2790502731055	1.11506523154435	1.2077099698307	2.41438181354493	2.62837939035909	2.07647148400245	2.4912528667105	2.78179427130375	2.56976247208674	3.09639154817589	-1.3040424406424	1.92703017079459	-7.97918688679032	4.96237908478474e-07	7.27676094468856e-06	6.06175683040496
ENSG00000070886	1.48626943321695	1.25109731992128	1.4524496370156	1.73404049916867	1.4860628317387	1.68274292962826	1.89261914726262	1.26239587164391	1.17603892082799	1.00633972877112	0.809997480246092	1.49328541815571	-0.505835192512347	-0.0179952124863729	0.820123346850416	1.15782205804273	3.14034931246905	0.00619386330023196	0.0151803282777131	-3.32869194190282
ENSG00000070950	3.6511908930337	3.68480454386251	4.19480570386515	4.28583853416464	4.14292278212302	3.66511868755975	4.17755710381812	3.32872567616707	3.26453038422601	3.31878478537451	3.41724621081481	3.53819704741988	3.81764651441374	3.90577476914194	0.450408633474716	3.74236740257035	3.16303597563954	0.00590359566427883	0.0145777759702324	-3.71453919562214
ENSG00000070961	4.25661049928396	3.91125864137171	3.67979154398467	3.36918258040841	3.58982720467447	3.59159910493535	3.63354582969769	3.2651101227914	3.05525757113481	3.16228650593132	3.48160365624215	3.48376796384203	3.26283893978253	3.57375318644282	0.395346084800365	3.52260238218024	3.21134972233356	0.00532931683458338	0.0133518145726048	-3.86293432696866
ENSG00000071051	5.85157854460999	5.9953070848233	5.86474181141367	6.10073131726733	5.65975842223658	5.69102236170403	5.80186225537278	5.8226034060763	6.15410928126778	5.91219245667618	5.72591595750674	5.69276426052277	5.57865507434572	5.50687605231517	0.0814791443863783	5.8112941632956	0.810580869170665	0.429253426261292	0.521037543734535	-7.78171266069017
ENSG00000071054	6.07628081127742	5.91676084461136	5.84571547324647	5.55205469164051	5.74513548187247	5.61781218138405	5.72984457061374	5.30575314863828	5.26460640898592	5.36831924982804	5.74679698360949	5.48863332052065	6.18815676925507	5.63711985643815	0.211753528748837	5.67735641370869	1.64199961709138	0.119691109422172	0.181916809525171	-6.8781755608576
ENSG00000071073	-0.11846435777994	-0.575943623205481	-0.700379555822849	-1.08457542381546	-0.970778987945836	-0.594088132002409	-0.535479705612961	0.678610736591903	0.574535935247053	0.734434809459532	-0.091924272954059	0.468840697865089	0.103821884717648	0.151079073530865	-1.02987694461078	-0.140022208694779	-5.80353425209311	2.47541730373971e-05	0.000157656977869398	2.19069863580979
ENSG00000071127	7.62109402999581	7.62099622918723	7.44814142284748	7.54815933605033	7.72584851765307	7.69482128621512	7.53084081403888	7.64169980162683	7.78673390937547	8.14531460450451	7.79163915796027	7.92394810176654	8.37544153845154	7.64735241675227	-0.303733305624975	7.7501450833161	-2.90404255445247	0.0101831955175779	0.0229943734034214	-4.6242456263231
ENSG00000071189	2.59665234297508	2.68080704269815	2.54228463388648	2.25551418788939	2.5633967951364	2.29815661752122	2.52346110624029	2.34377106995414	2.50710745768639	2.31587253979878	2.56186949238761	2.7465449616226	2.54291007626189	2.66696998856747	-0.0320212039992418	2.51037987947328	-0.346334043295683	0.733510665181344	0.79484631582646	-7.93631535515266
ENSG00000071205	1.92848040263862	1.46514148130299	1.32519645764231	1.57940642466376	0.711392257086009	1.57586040016796	1.53670108134065	1.45378574400615	1.44691581510036	1.61722510642062	1.0587329670381	1.33509947229047	2.25318798320699	1.14487026771315	-0.0334902147963163	1.45942827575844	-0.170493895407335	0.866714708101582	0.901143406142521	-7.54151176524352
ENSG00000071243	1.83513801093062	2.39288129987627	2.25656288812942	1.97592553782567	2.06141608693015	1.94580143003852	1.93932124617736	2.27803143598181	1.96599163915072	2.32052315550407	2.26185255528299	1.69461941701031	2.68724725089851	1.95920297108687	-0.112358876617839	2.11246535177309	-0.769156394703603	0.452774550129863	0.544322308339645	-7.4322838673886
ENSG00000071246	1.12880300421148	1.06548246652212	0.389826607101766	0.762286150797794	1.31902830481736	0.604731139592162	0.881795147183402	-0.0213484923111809	-0.157359659253345	0.428048961093499	1.33183512684951	1.78851442046681	0.618726569659559	1.03724176358774	0.16645117433558	0.79840082216562	0.597890929834573	0.558108141521888	0.644162705502533	-7.1073730099042
ENSG00000071282	-0.194542637449866	-0.115269186493888	0.252211861102847	0.0713003292168478	0.349317242715939	0.913099294796637	-0.345069950447871	3.44844456111851	3.66911615111379	3.9634235269478	4.27387022178305	2.85342357838706	5.20055393165971	2.51112288730478	-3.57145720215057	1.91792870083967	-7.4014791572697	1.31701771674325e-06	1.58093396417748e-05	5.38279718689572
ENSG00000071462	6.0522504583549	5.96237019739353	6.2635722756085	6.31913697438675	6.19224797399737	6.41382636356727	6.11938305679727	6.12988480958637	6.09660705554765	5.99873876936976	5.73247300750026	5.51750610967023	5.81845752649436	5.93097178587841	0.299757597051691	6.03910188315376	2.98705555420726	0.00855682119783613	0.019924444384707	-4.36753223754269
ENSG00000071537	3.07329199823647	2.51254742993916	2.61913011585042	2.61162783235995	2.613877876498	2.54356597845122	2.80062490662891	2.7865057513079	2.92537787843518	2.75614641278065	2.98268485866815	3.00796596872995	3.45455679499597	3.39972778973494	-0.364247259013843	2.86340225661549	-2.91660340816871	0.00991908259993438	0.0225528029747434	-4.39654736896273
ENSG00000071539	6.0150256299197	6.06183439904898	6.17952660294491	6.1575751979884	6.21328984788108	6.1621116023791	6.19768750436638	5.75484792655067	5.93632090120494	5.69889886594934	5.65408125302443	5.63754807213779	5.88641884297985	5.78161317992804	0.375638382144268	5.95262713045026	5.61657926032145	3.56852314892694e-05	0.000212800074696668	1.17978966672541
ENSG00000071553	5.47124090937637	5.40082405930072	5.64565890627934	5.53429508542151	5.48209806201891	5.67676184219146	5.56289027237496	5.39902233337329	5.33179535263763	5.58991890791472	5.12745288510528	5.06931950423138	5.68017149383708	5.22494013787453	0.191312041865811	5.44259926799551	1.99023279554468	0.0635632683194359	0.107046981972583	-6.21226553954573
ENSG00000071564	7.13327572195348	7.30943150793063	7.26888750306324	7.26441634325736	7.38010228611631	7.36851244368609	7.34118741227815	7.37459994172542	7.30434401509118	7.30226897831419	7.55567361541478	7.36404228104623	6.9843868775169	6.94130610521483	0.0345911362732743	7.27803107375777	0.382109141065967	0.707303794220576	0.772833690587901	-8.09430628241025
ENSG00000071575	5.82518833332135	5.24582910224841	5.51298335721065	5.72520428515955	5.6639938190109	5.67216309191785	5.44005122257517	5.88783859815037	5.81741916831954	5.85818188432534	5.37875274257103	5.74240849829991	5.36134741841175	5.51330420266675	-0.0698507676824187	5.61747612315633	-0.634974854058188	0.53423490497981	0.622455775273718	-7.9218275353759
ENSG00000071626	7.99059134721528	8.1627415924848	8.2934162129174	8.34014963276229	8.26200160529075	8.37696140919081	8.30619723555363	8.31147339780036	8.3926250936868	8.43579678000437	8.21332511514574	8.2191684959958	7.9014674046563	8.05953781276267	0.0289490508472863	8.23324665253336	0.330280883565959	0.745384059254411	0.803833899094935	-8.1624048558321
ENSG00000071655	6.18567335480162	6.53326671264221	6.28859106787358	6.34047344748062	6.24357698081146	6.23223208641533	6.3899734061323	5.75911645650794	5.3507552830004	5.78945841925967	5.85480669873492	5.68895076803653	6.10288851674103	5.81694405511038	0.549046793200297	6.04119337525343	5.5196608114194	4.32121116287027e-05	0.000247498640297854	1.10010081624539
ENSG00000071794	5.08964905280582	5.37610824735726	5.34413500879574	5.25921962325272	5.17400633696888	5.35059901553047	5.16687433329494	5.38325451985979	5.35119620395458	5.33625539380986	5.13121000204246	5.42416223138072	3.96357397024698	4.70571624926143	0.211201292963208	5.14685429918298	1.14288365577178	0.269554602633863	0.356239162341643	-7.48923442696634
ENSG00000071859	5.75241263283217	5.59905952932322	6.1131138235672	6.222872763315	6.03502583231754	6.32430133498491	6.07755877021878	6.19125761008327	6.40198856299027	6.58826657677044	5.75205018811302	5.74062996983687	6.04877056587763	5.8396494555352	-0.062917899549892	6.04906840112611	-0.430306888942393	0.67259341922226	0.743653207245106	-7.94845651211875
ENSG00000071889	4.427237359859	4.30992125025428	4.75636613993165	4.68734967357148	4.42218525311702	4.85290727938825	4.56728598906146	4.29409068988099	4.45008121386426	4.51425354267932	4.21605475100793	3.61519561711693	4.16569951786749	3.74153319533155	0.436729368549704	4.35858296235226	3.01426314450531	0.00808113561510843	0.0190022220965001	-3.96772488259231
ENSG00000071894	5.85283380885194	6.116951429063	6.06163600992625	5.96454769860935	5.92834688530583	6.19415188436366	6.01637558079077	5.94621561159141	5.77599636740595	5.79664396276112	5.92875799554874	5.9305112582585	5.89798385368482	5.91659471648344	0.135274877607727	5.95196764733177	2.05680366769166	0.0560333325224938	0.0966428748171584	-6.16658223696667
ENSG00000071967	2.19766727866234	2.28671328441681	2.46209562002553	2.45552491598222	2.5357332474222	2.0484634676759	2.53969870845534	1.38759982983306	1.68671081068929	1.02865728009393	2.22627320120919	1.45165645455925	2.33693222070715	0.708929441280218	0.798284736690457	1.9537611257866	3.89065554032425	0.00125417020405887	0.00397169528637472	-2.02920931203245
ENSG00000071994	4.50122424533714	4.27708097693924	4.41392365225907	4.51559989539312	4.41752006626964	4.61971559105552	4.44428041816581	5.12196268325387	5.27290217775826	4.63102213108956	4.98291473133515	4.72301238479937	4.65602021337803	5.14956569648282	-0.474661649317476	4.69476749025119	-4.05642398355894	0.00088168804009718	0.00296519069798916	-1.82328933857822
ENSG00000072041	2.97371821209603	3.34794482419864	3.39545077500774	3.63415820011761	3.71662749425929	3.28068255402126	3.25620268439776	3.70413430601916	3.69941008428168	2.85938712163884	3.56454123556313	3.88030452907279	3.09092406623323	3.24580976750154	-0.071864033519248	3.40352113245776	-0.457449431913372	0.653370930519352	0.728088042057411	-7.87213762462465
ENSG00000072042	5.64112413051367	5.49177303597479	5.55223193071975	5.61881991626078	5.58563887853518	5.54407744678021	5.81801338918502	6.26904848702481	6.02822017742029	5.92160114405418	6.0188864427788	5.84679418329532	6.22149357476817	6.37987832998424	-0.492162033370766	5.85268579052108	-5.50542693041721	4.44484113005824e-05	0.000253505910936921	0.973359916739932
ENSG00000072062	4.70910892587666	4.77420011927569	4.71443319270505	4.85860862886627	4.75126097953979	4.78565405761439	4.75277026958238	4.41457563428443	4.30581851242391	4.70490038339943	4.75464774165342	4.33832544302566	4.29466882105496	4.5221747724205	0.29539144115378	4.62008196298018	3.34611817141877	0.00400289775109721	0.0104840259368634	-3.39313588484742
ENSG00000072071	5.69458169487117	5.51755653610656	5.18511967472169	4.99388114265786	5.52181625707255	5.32075661668457	5.27952600851011	5.36964948278772	4.93638742451469	5.25579847321761	5.41703471116234	5.48640361691558	4.61503972234434	5.50394246405533	0.136169027799746	5.29267813040158	0.960334717876595	0.350881212199167	0.442592520849421	-7.64585680411339
ENSG00000072110	6.68220073604187	6.61375790030796	6.72724214590302	6.75159539323221	6.81441239470813	6.92174633078653	6.73810420693892	6.56547557254355	6.57495998756232	7.13549901411397	6.64479152665053	6.62055258400703	7.56726932375596	6.77556837936174	-0.0911944503646076	6.7952268211367	-0.676302577255031	0.50830798521023	0.59843456064942	-7.99657185296201
ENSG00000072121	3.10859717448727	2.57239334182578	2.60749813933772	2.52459007789737	2.68522392119907	2.35874902389671	2.62698276471785	2.16563672124982	1.95890651226018	1.84606471376426	2.69814056441983	2.69465986891806	3.09522035519202	2.93246924025711	0.152577472675995	2.56250945853022	0.830751780508601	0.418086320884628	0.510025920766444	-7.69983943423045
ENSG00000072133	3.14522188748382	3.02837516517662	2.68313464020416	2.50961304355274	2.74730375709914	1.82314562969761	2.50644009164997	2.16867035457911	2.48003208992621	1.57671588222217	2.90896522126696	2.99600106966039	2.97183493271651	3.23798308670687	0.00722782235577846	2.62738834656731	0.028966341318742	0.977242235655105	0.983138969264199	-7.65875531125576
ENSG00000072134	4.60402884813399	4.45777565566657	4.54322506779615	4.78167724227638	4.65136731338147	4.89321968519911	4.69374015590091	4.42659931619213	4.34506765674254	4.63972755068458	4.28763630877715	4.4231436321369	3.99125490595226	4.16996625357919	0.33625850513637	4.49345925660138	3.44075494956517	0.00327251319710415	0.00885499291284007	-3.3640280495187
ENSG00000072135	2.00679378327198	2.33944601905488	2.63662369490613	2.32785052051996	2.26271485966682	3.31982814276982	2.33195502017021	2.68433594860144	2.05043895685011	2.38714516080234	2.10256862720746	2.78660809156224	1.75638247416995	1.99557118259333	0.216005944554062	2.35630446301048	1.0459004216644	0.310831361712655	0.400542986067202	-7.06590503452925
ENSG00000072163	-0.808187834028155	-0.66148149558231	0.333156263832305	-0.379398278988899	-0.183322476188748	0.310341636833467	0.20313809343438	-0.430209537649966	0.716077169840692	1.12378096945805	0.734154820946365	0.440301391358788	2.58456141729911	-0.812170093535262	-0.798230723880586	0.226481574787844	-1.82322180180959	0.0866150279871452	0.138873864527934	-5.66825774919028
ENSG00000072195	2.45929605947439	2.87755412164112	2.40767250825632	2.35804393180144	2.38318011228358	3.14440019033545	2.53909304006287	2.56714031063497	2.48587121308681	3.29467721319794	2.30097730081407	2.52340587525341	1.80942905607438	2.14146773982683	0.161049091358931	2.52087204805311	0.866446502263141	0.398788361370756	0.4904661627166	-7.65457466592385
ENSG00000072201	0.141009634115767	-0.188531878047161	0.660323156630343	0.59866446519461	1.01826100044207	0.718787368146524	0.680397908815788	0.706569159464571	0.763405934256867	0.68925935271999	0.319520191526154	-0.0526799263993256	0.0555206367881174	-0.626381626012513	0.242422486369127	0.391723241260129	1.04201465033479	0.312575811358319	0.40255413326208	-6.87521512291683
ENSG00000072210	4.60208720883805	4.51957481347191	4.58742361629978	5.38068839115144	4.33175041407072	4.57881389275445	4.39530618116376	5.40939436816234	5.39861959122381	5.55171862275189	5.41372021414223	5.70208639003435	5.95933036850309	5.5938480649521	-0.952183549088669	5.10174015267999	-6.81814277957354	3.69144270091921e-06	3.47475244492558e-05	3.68960326614512
ENSG00000072274	5.66106483091666	5.48507791339088	5.74389498575669	5.43955881920808	5.53367209441081	5.03409219357075	5.5576669550787	5.99440718510904	6.71273467797344	5.83130446461779	5.97493342881828	6.33002903655352	6.17310716808224	6.57805207486192	-0.735281306724671	5.86068541631063	-5.3016413624809	6.67508444938173e-05	0.000355235910946327	0.479772035558089
ENSG00000072310	5.35097565275925	5.78043087722564	5.6314349317648	5.56831166484533	5.59366387318341	5.64849473575516	5.52227340673277	4.62303801481661	4.72788194616172	4.76577372577614	5.2392905874186	4.69085750760163	5.22181019215052	4.43815677770442	0.770689238930278	5.20017099242114	6.6147548017903	5.34541853562894e-06	4.66707955503155e-05	3.15871957008007
ENSG00000072364	4.57582273524102	4.53192433953981	4.15811425818673	3.95460324186502	4.12382276495453	3.78343267442057	4.14145297472742	4.20167056011094	3.86453208184689	4.00078608982924	4.3798996657052	4.40037582336492	4.68638852644232	4.50733600493644	-0.111336208664242	4.23644012436936	-0.791193425350571	0.440163820267738	0.531999389918436	-7.83550796166033
ENSG00000072401	5.40183015688169	5.19081678880045	5.10947039694532	4.91160209978334	5.18533037003365	5.0505215112987	5.18294471858981	5.60708023485656	5.54907522991034	5.67184296048921	5.35565581236901	5.20220812371329	5.31282701116784	5.45685455422266	-0.302891330597131	5.29914714064727	-3.27808316219267	0.00462568158306181	0.0118325284883239	-3.65973200070456
ENSG00000072415	3.70263284293716	4.05449886021291	3.75659679467895	3.46174498394016	3.69843030489658	3.55544076264985	3.70361182288701	3.66492099268411	3.81042062643156	3.61424665553922	3.83555891963641	3.99666904993606	3.77830279800684	3.56739577680705	-0.0483717077847117	3.72860508508885	-0.511086013329383	0.61612614037492	0.695499096132736	-7.90734522394542
ENSG00000072422	2.68449945910278	2.72604523339283	2.75491650167458	2.71131773755154	2.79326558462711	2.70455602967739	2.8536960881026	2.32481366993907	2.29675422617882	2.19680138570171	2.74392312866109	2.68356865309392	2.52497485266488	2.04085344813715	0.341651781060574	2.57428471417896	3.27027426994455	0.00470302708096311	0.011995084367645	-3.53541351745284
ENSG00000072501	5.97748693940154	5.87948602142511	5.52211196493456	5.2815016036724	5.42108541577959	4.93575162295765	5.4966245544327	5.37258007524819	5.11721653778625	5.85605257202155	5.8511380433074	5.83366360771829	6.34074734310675	6.31159311963038	-0.309693756984029	5.65693138724445	-1.61225318772225	0.126049257253099	0.18998706006532	-6.88399732502347
ENSG00000072506	7.15657439392695	7.1552840170569	7.28278252606516	7.33918986417728	7.19602503720879	7.3984260283203	7.2351908094065	6.98673916351401	6.97776515367879	7.00884454173016	6.81234397242594	6.65738698586382	6.81452440146508	6.71055619288859	0.39942160157907	7.0522595062663	5.38118206549525	5.69194556271369e-05	0.000312057069566614	0.691894742697466
ENSG00000072518	4.79126313802043	4.37788539048307	4.4800717243474	4.52254114714176	4.39287713777001	4.63290779836168	4.45688234193849	4.81224703612998	4.78416499238768	4.66630633964472	4.73223672653705	4.63949970805874	4.82144095695678	4.73103080625901	-0.218767794288851	4.63152537457406	-2.92104522530593	0.00982728999012485	0.022390106040773	-4.42921199277006
ENSG00000072571	6.31876847494663	6.34302624845822	6.48620984311042	6.37494537581424	6.18827789450786	6.36075903841226	6.42720456567016	5.76797700964513	6.0314160553146	5.89247613871725	5.6753781836104	6.13065103043225	5.46766559293921	6.1172347613879	0.489456513845	6.11299930092618	4.98912380596463	0.000125745865600319	0.000596710664452675	-0.148624709073506
ENSG00000072609	3.02486581043766	2.88036333819878	2.80246170493503	3.03131479885893	2.80888890759239	2.96946218752231	2.89833347665388	3.81788972630596	3.8320341391502	3.88237484327611	3.74661301460885	3.15968010326215	3.97096863279135	3.4963415591098	-0.784920624610291	3.3086851601931	-6.05609232130349	1.52145266328399e-05	0.000107286213005965	2.44795900257168
ENSG00000072657	1.72546404554808	-0.516330947506727	1.64784193605787	1.12992251852117	0.161387610023934	1.06991391318531	0.170166028542155	-0.60661556144477	-0.0512037399191354	-1.79512742287847	-0.856487279602274	-0.450178021743999	-0.466486092040342	-0.547149930798158	1.44236128717302	0.043936932567474	3.929136848723	0.00115555058156016	0.00370891511818794	-1.65121714336952
ENSG00000072682	1.04499906281181	0.800011302504308	1.65836747765513	1.74211953284802	0.762358517697147	1.70542860500261	2.43097304571278	0.968690723806641	1.670073884097	2.30685965551277	0.963029109214591	0.842029988692768	1.55693950567181	0.773157041011129	0.159214514091449	1.37321696087418	0.568727268984249	0.577274185129032	0.661831585079639	-7.42883203576964
ENSG00000072736	3.88001953752546	3.76251973151941	3.77128738239614	3.76085748724811	3.64965552311063	3.85794654857752	3.77287808287508	3.9639999412978	4.06946331064686	3.83776054326075	3.86332383448848	3.95980841190564	3.9582040245773	4.14526402948735	-0.190444271609279	3.87521345635118	-2.77303438292709	0.0133777175532278	0.0290128653493114	-4.72124274986892
ENSG00000072756	4.40157754154266	4.20066716133578	4.48785084068337	4.40247965824131	4.55844519083607	4.23853676230399	4.41671635912536	3.80952249902074	3.95185410949452	3.65667034357747	3.79038239235156	3.68947977830465	3.95469463862383	4.01301493436034	0.5452995943451	4.11227801498583	6.39670144982824	8.00002139118655e-06	6.47395348085981e-05	2.88265570951809
ENSG00000072778	6.05953653413718	5.93165759275144	6.11974827393856	6.40983204796327	5.93657753176608	6.28455068106451	6.29079832527317	6.70552017165137	6.57027409318099	7.02899260121777	6.43277123753806	6.44633243682702	6.67847617409165	6.83718270557775	-0.522905752859442	6.40944645764134	-5.00242356114639	0.000122374232683489	0.000582258321341184	-0.0965483811225756
ENSG00000072786	2.89081084750797	2.92644688904836	2.33500596193331	2.63305949737238	2.60024640628275	2.69518852875909	2.59425222950826	3.07574308700641	2.97649406152085	3.43111179562425	3.44974680042894	2.78466815426893	3.42895134003561	2.84271822728002	-0.468779418566779	2.9046031304698	-3.48194153999313	0.00299755428847159	0.00821509417811026	-3.04442530806562
ENSG00000072803	4.81680734527522	4.67977056673811	5.01014066574452	4.82231696686373	4.89774597326704	4.77203020434504	4.94138121544705	4.71955698833507	4.60309211836327	4.65553447784243	4.79906464323855	4.74691735164883	4.47604847671025	4.48142642939056	0.207436323057683	4.74441667308641	2.73067210417697	0.0146039297660048	0.0312452459075094	-4.82825031233237
ENSG00000072818	6.0445276280403	6.09721156235181	6.13142182012591	6.48341141984256	6.13230640181786	6.20859520374288	6.2750075339368	4.11009032941884	4.29195225534674	4.35897399517201	4.69324709183432	3.25546107103337	3.76305758758099	3.68072976668353	2.18684585540248	5.10899954763771	13.6359800627824	2.38111836929061e-10	2.33714448972871e-08	13.7391124304965
ENSG00000072832	6.62252670537755	6.79637888096736	6.81209164519716	6.74450607760704	6.84379266918487	7.08232120802628	6.56514965048755	6.59002351600271	6.59389440308874	6.40549158074643	6.71400686758298	6.223451772203	6.28461374154272	5.92551345201678	0.390679663739609	6.58598301214508	3.43788256421453	0.00329259889351855	0.00889549858668464	-3.45933313794179
ENSG00000072840	1.28517196593695	0.75453390898797	0.374418307894234	0.707921392746686	0.160483674616178	0.251209804661218	0.0769587820169391	1.04061784535756	0.856165972428441	1.26210872855285	1.70754844014294	1.76450534513764	1.9058187922512	1.92161999283074	-0.973604079932834	1.00493449668297	-4.31642746485457	0.000508739118734756	0.00188639623436417	-0.875992695760632
ENSG00000072849	3.25123362213895	3.49847348746816	3.50582014906384	3.39496053516758	3.37032771801734	3.42521978083462	3.4879204541694	3.6583093891933	3.44161773284495	3.55245381572364	3.33636668097266	3.01602998121281	3.96259803861096	3.69142725545324	-0.10599066264599	3.47091133149082	-0.875743249796125	0.393859871548291	0.485382416650912	-7.53598747413454
ENSG00000072864	2.62568860862341	3.33075507490975	3.1388729405904	3.31032073243693	3.46787687852202	3.4588763891639	3.35866146099835	3.48834137773534	3.76992809996113	3.50124603923143	3.27932557094406	3.7805545245533	3.21866742261422	3.47241509239649	-0.259784693411112	3.37153787233434	-1.94828219532841	0.0687663190793316	0.114228861677978	-6.09210613510952
ENSG00000072952	0.640826088868856	1.13119122682726	1.01259723033669	1.09732301053278	1.18806356035801	1.11844744438715	1.4200105336458	1.04099596227249	1.25900453077431	1.08826833256278	0.93486202543439	1.60176938359254	0.403919636108337	1.1345514558013	0.023990705624426	1.07655931582162	0.145777339179064	0.885880154494076	0.915906163807968	-7.62459691455195
ENSG00000072954	2.73078731118363	2.15778238199902	3.11672907696803	2.81001223409712	2.92699742778924	3.15391703914128	2.8049171965538	2.5403447005292	2.24266268542742	2.2471374185764	1.9516833256545	2.46945067546875	1.89332155745738	2.41824928672937	0.560051701262171	2.53314230839822	3.30318613307155	0.00438545994686788	0.0113188733915831	-3.05774954768027
ENSG00000072958	5.07002822172674	5.06546011747132	5.16750262923196	5.15955712999863	5.06213556972707	5.33458580694008	5.07716393114371	4.46119527534277	4.90261964648092	4.93601262879918	4.91035949371524	4.85141749798926	5.54219292835659	5.53628970023721	0.122328643700825	5.07689432694005	0.834772752558373	0.415882764272138	0.507643077319846	-7.54348090852662
ENSG00000073008	2.2554128064703	2.18230418237999	2.29916244565428	2.17578104310544	2.34546556802816	1.73968750765357	2.18142464411799	1.77511828413186	1.84903258729179	2.29866045645178	2.75423502591893	2.62582493105045	3.84797935163723	2.5442892283238	-0.370052843887756	2.34816986158683	-1.3499242706878	0.195442851439912	0.273669459833774	-6.39879437292111
ENSG00000073009	1.76867987282932	2.25063960224564	1.96657028775099	2.14507221638304	1.86459776876009	1.69040421083902	2.24325123467343	2.22223617292423	2.63943564983529	2.21822140336244	2.24000207692269	2.05907204392555	2.91176803636754	2.96020955414895	-0.475762847036083	2.22715429506916	-2.47547302606914	0.024605099819376	0.0485283859830863	-4.46976043270981
ENSG00000073050	5.77366854514488	5.88970923792235	5.93820684863701	6.13329935397622	5.94438538915685	6.3055048433918	5.92576148399883	5.98847134352083	5.89029851368783	5.89396628775733	5.79839214607174	5.5296738908287	5.74257525699102	5.87480889663061	0.172973932031729	5.90205157412257	1.86844732924996	0.07973424993936	0.129600100963134	-6.39812310209065
ENSG00000073060	5.58851009106723	4.9171235822589	5.26613178859774	5.42437207572146	5.40975880486748	5.48308286921258	5.55658800794501	4.80011063747555	4.7533579915527	4.51840023726688	4.97080539384594	4.86535776083202	4.61913725518465	4.71366975135547	0.628622542685783	5.06331473194169	5.97206594345899	1.7872151796311e-05	0.000122203348040956	1.95722405424227
ENSG00000073111	7.35193551002214	7.25741558458141	7.44559864417989	7.18426809305676	7.35156182888001	7.28290751172851	7.44761718286834	6.2928861136554	6.03611213651339	6.044985310712	6.58650911667001	6.13292647100951	6.56506449433579	6.56660439500354	1.01404682960327	6.82474231380119	10.2906421317862	1.4979919318861e-08	4.95436407689828e-07	9.20889344940277
ENSG00000073150	0.991133456252867	0.813986762848316	1.29926347005637	0.535998846643295	0.378527083425298	1.27017720441846	1.24922576198633	0.958427747236892	1.12783565397563	0.62033387358006	1.23364495134366	1.17270524901878	1.63661551076829	1.01910443219567	-0.171275874011661	1.02192714312499	-0.869403744628494	0.397216247505802	0.488977338767383	-6.86808771675338
ENSG00000073169	3.40907835189977	3.6508026190722	3.47078487154577	3.73203208796097	3.63736800492031	3.98034458522152	3.73293959382332	3.8329650702088	4.17951963546687	4.45832492231704	3.87186143906333	3.6210634649368	3.60164207439643	3.54347491648405	-0.20299011425492	3.76587154552265	-1.40616724203279	0.178404075852256	0.253485408264979	-6.82367413940527
ENSG00000073350	4.5013715287215	4.46864056876119	4.46993717133374	4.37275066832194	4.37594418807492	4.56096676599749	4.57435197928043	4.6102457289804	4.74144062260448	4.73942862178211	4.90928456687964	4.87318525920771	4.53663673871747	4.76769563063764	-0.259282613842788	4.60727714566433	-3.36870651287036	0.00381508291418559	0.0100592231690972	-3.43233179828074
ENSG00000073417	0.788822465438622	1.19293657640948	1.30833812423272	1.46757813062134	0.745049853277273	1.62316478968963	1.21073170858508	2.3112161636488	1.87522561759145	2.93761630559338	1.53440261283671	1.98707873272263	1.23666513455975	1.22469364175171	-0.67559488172553	1.53167998978276	-2.68132269961937	0.0161689722971194	0.0341061632284645	-4.39615437508699
ENSG00000073464	2.63270927833787	2.73843410805401	2.47679904001733	2.70287827759207	2.97140859314854	2.14886986534394	2.52282124532782	1.58173350569745	1.6080990873973	1.14471355288777	2.15228182558214	2.22154745044162	2.11133319699257	2.16149074529576	0.735276944866151	2.22679426943687	4.0862885860911	0.000827558034508535	0.00282213752816009	-1.43756010315577
ENSG00000073536	6.08616457148574	6.15269319645995	6.26938419724972	6.37563297307756	6.4810958781782	6.26835062205227	6.19014359620756	5.04289263607575	5.15374838667275	5.22071173058213	5.14378020915314	4.93462337505769	5.37109761629713	5.44622541886621	1.07418399290156	5.72403888624399	12.2198101392257	1.22792416956049e-09	7.32601228809839e-08	11.8904336821364
ENSG00000073584	5.17177088448935	5.45047496473637	5.45440016564766	5.42162081289273	5.4970620236952	5.47244495120864	5.35271751170872	5.60763632509489	5.53774393088901	5.70084503859422	5.33191041283998	5.20537969898793	5.19209186601046	5.32451579489885	-0.0110656750993492	5.40861531297814	-0.124196772831878	0.902674301985638	0.928772417741753	-8.16046404908259
ENSG00000073605	1.46987811047094	-0.264193737883898	0.728697504995631	0.784235227073768	0.174231061744405	1.6734053201696	0.64413348673821	2.62340774067624	2.6439681407873	3.00333640632307	1.79137631722639	2.6356098823333	0.929740930979536	1.37655767686894	-1.38890167492148	1.44388457632167	-3.77087811178863	0.00161874735459548	0.00491316061166624	-2.10917317888483
ENSG00000073614	3.79836204102473	3.4175005568776	3.17536282756688	3.11465902217163	3.20075267053938	2.92637141722304	3.35549109222908	2.77856829920256	2.94861307166193	2.49453364585121	3.55067925516411	3.41146132482655	4.22856527791331	3.94565312852285	-0.0550362478599546	3.31046954505535	-0.236081673182288	0.816302696169176	0.861609584170934	-7.95505597303163
ENSG00000073670	0.436208475621825	0.658277436464044	0.968716204585764	1.11385110575338	1.60797912058261	1.35546381217515	1.2181209821736	0.777084181058866	0.327431876848664	1.02393456562281	1.17137782366003	1.09043920133617	0.329207034885155	1.13519567541527	0.223009067161522	0.943806249727381	1.07833262551704	0.296545398019811	0.385151428801528	-6.78627893411364
ENSG00000073711	2.63419538461241	2.91309404643023	2.85436253750749	2.84421669077186	3.11227274299066	2.65617038990183	3.04620793155854	2.56316188106071	2.42463074870594	2.56508572121432	2.93347573579115	2.61128581644552	2.39735397837611	2.34768490516961	0.316092596506282	2.70737132218117	3.04251358973761	0.00761458078784209	0.0180974541630201	-4.0747179464226
ENSG00000073712	5.73763168982118	5.3876287139568	5.21218005442101	5.03376843234966	5.31799898314192	5.04367974237882	5.10248434443437	5.56239043070654	6.00139940787669	6.11263323129426	5.83475442520631	6.02106099408917	6.67680194744734	5.92833804070428	-0.758411889520109	5.64091074555917	-5.18742560983503	8.40233330246166e-05	0.000429143091163495	0.257200021187566
ENSG00000073792	4.95585156721366	4.65782752632704	4.45766882037775	4.59991032238937	4.76060067776132	4.58515946931801	4.58556382795683	5.43844009998572	5.32111951964175	5.73291960876171	5.57173796640039	5.78443844466568	5.90478435004242	5.46038296226257	-0.948985092259151	5.12974322593602	-8.42956709702013	2.38844901443964e-07	4.13510852841321e-06	6.63868144787137
ENSG00000073803	-0.567942958330371	-2.33786132073849	-2.07643329253652	-1.17882020743944	-1.16500502082943	-1.65823585773956	-1.45447004981424	0.436737981682485	0.186378603811328	0.522730502115977	0.434031078898442	0.40154926703483	0.0607481443836142	0.184244422747712	-1.81887776082713	-0.586596336196691	-8.09838546743534	4.07906763130685e-07	6.22134487977891e-06	6.60831735440596
ENSG00000073849	5.05465883866188	5.01926211408637	4.54965327465309	4.69076105484582	4.84979496380956	4.16824287322757	4.74873851967782	3.80561819395115	3.74117332922562	3.29391568920302	4.76641087296162	4.99828155783231	4.55232761874348	4.86444200881235	0.434947726235499	4.50737720783512	1.81486757958563	0.0879419779038057	0.14065827999298	-6.45385189139956
ENSG00000073910	-0.91666438059463	-0.163142377013055	-0.740590026149992	-1.55310939597584	-0.0499973451207874	-0.670522535271531	-0.388652099678488	0.548592326944473	0.736301205967737	0.521207558198769	1.03774188359982	0.684730700520348	1.3693131653955	0.125029454862816	-1.36464381076579	0.0385884382632243	-5.99163448137727	1.72130184826512e-05	0.00011897131600031	2.49269467170396
ENSG00000073921	4.78706410979641	4.9843711943093	4.9679405919233	5.01649667024647	4.89318555137609	5.06804970191934	4.90917009504326	5.05820411644929	5.24452085001957	5.24024777752062	5.15056729947498	5.4478973364488	5.74246032425413	5.06416875307495	-0.332510253981888	5.11245316941832	-3.37059130703967	0.00379981214372584	0.0100298229454104	-3.58665455050978
ENSG00000073969	4.60129117324927	4.10568441610277	4.40921939066772	4.57489783714444	4.06704575605109	4.40085585938813	4.38254160926283	4.26971718250376	4.2169541953549	4.35899171517573	4.13918009648198	4.03177464002379	4.64801335766411	4.12995185404682	0.103439543768942	4.30972279165124	0.925696350936656	0.368072888982003	0.46008166086063	-7.51730545904293
ENSG00000074047	3.98312115348011	3.51352500543168	3.40030074983165	3.15289063459557	3.3835170900455	3.36569243722762	3.34236054404525	3.10992324455966	3.07905170530739	2.79043964399339	3.613044604836	3.56066555696451	4.31231123051978	3.78845889323934	-0.0195795342574212	3.45680732100553	-0.0982291808802991	0.922945074951614	0.942616808528665	-7.87577264729901
ENSG00000074054	4.06915746082614	3.88000746692187	3.59278584880288	3.39428507590046	3.39560195754207	3.27817473187832	3.69230822229632	3.24539063770587	3.04824428775093	3.15927167481965	3.56843467652929	3.90937059108165	3.74821279580412	3.77632289233368	0.120148826564557	3.55411202287095	0.777480817944707	0.447984824215953	0.539630175725689	-7.73348124188582
ENSG00000074181	5.88850402772724	6.05330916188448	5.66052771036435	5.22876414716545	5.79855702867583	5.64751253551178	5.44121184503805	4.67557278021471	4.9919439412896	5.1475995248264	5.44680940013753	5.20666841543146	5.77311503326533	5.21205578596955	0.467730693005348	5.4408679526787	3.09847839814545	0.00676686603239552	0.016331454784907	-4.18606804257787
ENSG00000074201	5.36358393794836	5.18950176448982	5.54454170000353	5.65667459416736	5.54152676724264	5.5126653751964	5.39995824591192	6.11544108836449	6.13131337776036	6.02966942057411	5.71086049123072	5.85461288075173	5.58101207696712	5.76329926710877	-0.42642992437604	5.67104721340838	-4.32227369035913	0.000502512393890379	0.00186807524313983	-1.55893211004844
ENSG00000074211	2.20136334413221	1.15426854735994	0.981000823092803	1.60571074276643	0.909064005017255	1.46750955668466	0.937822341301021	1.60700104953591	1.85625623860023	2.54431289470594	1.96787756928048	2.35818562639072	2.21930283927215	2.08448311385791	-0.759936519531861	1.70672562085698	-3.67770659430192	0.00197452594750093	0.00581605888359967	-2.24235184447724
ENSG00000074219	7.26659078045831	7.53429891902397	7.4118924446327	7.34445954162876	7.49182842278498	7.18413490838543	7.2403785421633	6.9250798865055	6.61340460937915	6.83631681874447	7.03884511970979	6.76788600157575	7.05620149705874	6.93471152876484	0.471103308791491	7.11757350148684	5.75824805501339	2.70359753730356e-05	0.000169354017635212	1.41467810371562
ENSG00000074266	3.22527731454771	2.78993362423304	2.75423866057294	2.94137127812757	2.79428147040279	3.12063005256062	2.87378806318273	2.93979157231723	2.99801090432627	2.78024268321468	2.67741039325333	3.0517780810924	2.72904380724053	2.85466396096901	0.0664592313244046	2.89503299043149	0.689502497360517	0.500181357646453	0.590466275840444	-7.68877038079453
ENSG00000074317	1.48156898579525	1.21724762520737	2.04617840062629	2.23519721451138	1.96810053934395	1.99442731506282	1.67056359851751	2.5855376254715	2.91313769954225	3.3955713486242	2.4298149442397	2.39389716195951	1.90373361225464	2.14780021443808	-0.731184258037681	2.17019830611389	-3.23183385611214	0.00510278639599039	0.0128424344966086	-3.19393534515145
ENSG00000074319	5.42990586550159	5.72599093687963	5.75638041178326	5.73519429558801	5.69640992426735	5.60847906168644	5.58052217369679	5.74899659139946	5.54442671519531	5.49003372691045	5.44604966542778	5.38579395250015	5.51004629359435	5.57074345464907	0.11747598468154	5.58778379064855	1.55787487805134	0.138416243148597	0.205396744130891	-6.88023686081091
ENSG00000074356	5.62540647524501	5.22904933028047	4.76460404868654	4.90587099951308	5.08284851810544	4.76864369791446	4.86879302471413	4.44042333751196	4.46793876026085	4.55047792814808	4.66196032715546	4.82968157993168	4.88450708004126	4.9734374410246	0.347939509262951	4.86097446775236	2.6129362917039	0.0186058784236864	0.0383882261899792	-5.07585396092992
ENSG00000074370	2.58308590393691	2.36019472946415	2.0342836534168	1.8997880121092	2.12048657539883	2.35900954512708	2.15612938502159	3.61194985756169	3.64142568739608	3.86982984655032	4.41698120545519	3.34157427642974	3.19160900010076	3.82699492149946	-1.46022611608893	2.95809589996199	-7.99469130915304	4.83696025133151e-07	7.16187873709924e-06	6.03039397502325
ENSG00000074410	1.33644725016239	0.996051420131557	2.46029514430076	1.80435399098124	2.63068430795981	1.24029144641167	2.00675388047314	1.0568475281976	1.98419997075444	2.01467816094882	2.24809983333792	1.87227709198679	1.71469855191883	0.98279752072264	0.0774640731761547	1.7391768641634	0.284692977351214	0.779455489274784	0.831660625928237	-7.49187980520355
ENSG00000074416	-0.829956727348061	-1.15169571379731	-0.798794443641721	-0.350541098737835	-0.79949814873411	-0.665850659220703	-1.33978115300822	-1.54453185040293	-1.872315387713	-2.56147765824139	-2.00413711367808	-3.04482089539221	-2.19772140232863	-2.33609106923066	1.36879411951742	-1.53551523724821	5.77226932396725	2.63071162285693e-05	0.000165298870220917	2.43922482397797
ENSG00000074527	-1.05570524368197	-1.29240194246863	-0.527585621749192	-1.35964100136737	-0.427037162366286	-0.73956359790442	-0.73861038329555	-0.397351401631398	-0.104064106830753	0.208678761310086	-1.27726666518487	-0.54316356221339	1.11063703323485	-0.802700362273242	-0.644906662626596	-0.567555375458724	-2.01286179502185	0.0609066464313626	0.10337683774142	-5.22263892785273
ENSG00000074582	4.0849013966897	4.14526421095363	4.00813039991005	4.26424204043012	4.08995104889432	4.31133883193148	4.06160975728156	3.95269586972888	3.95191291616119	4.11943515716365	3.63868393051641	3.8102714553636	4.21450042030092	4.43134244808721	0.123031969002867	4.07744856310091	1.11073874418835	0.2827567854567	0.37041822779943	-7.27118582744279
ENSG00000074590	3.4181536043321	2.9929771504416	3.05954974994007	3.23569944900691	3.13037421166365	2.58803549252826	3.22838438613442	1.73735081504952	2.17181487323562	1.51765896176688	2.8295222665509	2.47514262915421	3.21075996424552	2.00974108295916	0.800460966359264	2.68608318835777	3.6250436134932	0.00220924924884901	0.00638688185457038	-2.58910910452419
ENSG00000074603	3.24435781538305	3.40303494726386	3.07980751695439	3.07290286947252	3.14667485756446	2.89686727899535	2.94573374001054	3.27505759736022	3.19779557211547	2.59208207208498	3.59943716851881	3.41058440981248	3.44612667126557	3.46827518314819	-0.174625826136222	3.19848126428213	-1.25950254203931	0.225541025895297	0.307259886520222	-7.04170421275689
ENSG00000074621	2.09895075908413	2.06511422648638	1.44744424913222	1.77945648614914	1.94924219201456	2.1119526570331	1.60297127177957	1.01501603093292	0.430068421804647	0.729716925234454	1.4844478264981	1.59356026474689	0.790911887530899	1.23665626044571	0.833017527803651	1.45253638991948	4.68191334170011	0.000236818002932726	0.00100254327432842	-0.284798660815369
ENSG00000074695	5.51490569534116	5.56677183025358	5.27669982989534	5.28925578896395	5.44807091139547	5.19647959882578	5.27943145397875	6.01434988779554	6.08476765314004	5.90537019371297	5.80942174395734	5.93516020865159	5.81577756883536	5.97584013872704	-0.567625225303291	5.65087875024814	-7.64850820486544	8.6299630761898e-07	1.13797703792314e-05	5.00080636698728
ENSG00000074696	6.99202875322071	7.32217378827433	7.22185044171825	7.11507625388144	7.39383938936547	6.86169107712611	7.01398446705216	6.85541947354161	6.80195601972163	6.59000469759671	7.24797790894102	7.48819605561091	6.81544888033532	7.04948772385846	0.152479852459786	7.05493820930315	1.20372539066354	0.245842841768049	0.330004767526076	-7.42422338299024
ENSG00000074755	2.50250406235408	2.20742566617316	1.95642979641938	1.90085248083833	1.81869535780399	1.8508627305361	1.67838546058469	2.35892170134189	2.24499435541652	1.85720276695175	2.45429394125188	2.52224255522074	3.09624245436364	2.82113425513414	-0.495375483191886	2.23358482745645	-2.86243620963242	0.0111077464352651	0.0247333300152966	-4.38400657538803
ENSG00000074800	8.56550517731116	8.4823114529588	8.99943139892802	9.07587669072164	8.63763231522597	8.51177663152336	8.91216224917893	8.08640756082203	7.90267536136875	7.50032026098551	8.2245668407751	8.16816114112348	8.63849849443384	8.71602178271039	0.562477853109296	8.45866766843336	3.4465157255546	0.00323259622181172	0.00878408765699272	-3.4817113461299
ENSG00000074842	6.95095228451212	6.8489696367366	7.02644804063667	7.22384722593746	6.93987675216824	6.78255872313884	6.74674442434018	7.61804761706227	7.80791885354031	7.56709785017556	7.46959541603768	7.15338951296562	7.9409063479944	7.66568970414491	-0.677582142434529	7.26728874209935	-5.53988637155408	4.1516149373097e-05	0.000239361939374687	1.30046632441521
ENSG00000074855	4.06045199067972	4.22603230000552	4.04578613336322	4.35186332226381	4.28009244563301	4.67226870466924	4.45685592919885	4.40142947512307	4.21192908821233	4.60497392892857	4.34566351849694	4.17202312239594	4.03497355579332	4.02071281557697	0.0485254300460998	4.27750402359575	0.414040795504886	0.684227483423619	0.753572771762634	-7.83307008423174
ENSG00000074935	2.64999010902247	2.63375321883904	2.72660690242044	2.81252485128419	2.76516466136433	2.67620996889954	2.87407242113186	3.62172482122414	3.59616848199446	3.41415375922309	3.30827306087829	3.77066579155871	3.31540422584776	3.66933680897919	-0.798537348609286	3.13100350590482	-7.31551404491714	1.52863277135834e-06	1.77021783636559e-05	4.90668113346949
ENSG00000074964	3.86331681470242	4.39114432089598	4.18988661366061	4.32560586484262	4.36245531155051	4.53801684652638	4.25130107386587	3.86951325725977	3.88146104460965	4.10870079628874	4.16144039606203	4.00475010844256	3.64249113616085	3.79172451868419	0.357087057881619	4.09870057882516	3.3870846009492	0.00366874210363136	0.00972402700359077	-3.47108748201454
ENSG00000075043	4.07209510752337	4.47886719796177	4.68519855918716	4.58637586936591	4.53747618305677	5.01219660357109	4.77412228419769	4.48890428329212	4.86717703875972	4.97952193080135	4.96443192036309	4.75767831556142	3.41917489094741	3.57242989656823	0.168335167060245	4.51397500579694	0.69898030032798	0.494393062682136	0.585051819728174	-7.75098213742201
ENSG00000075089	4.30866036178703	4.13270915271337	4.27095048381202	4.17956490142079	4.40818600963592	4.23435746792886	4.19186322782527	5.0293080300162	5.00617699741729	4.72143717924408	4.70989164645009	4.72110137348071	4.42710638867472	4.81488035177836	-0.530847237649972	4.51115668372748	-5.4942665926953	4.54432588605327e-05	0.000258332509851258	1.08627941522895
ENSG00000075131	4.54427112571898	4.82159140499707	5.16813144180908	5.24320920478172	5.13407781777101	4.76416289265635	4.89018304866344	4.63859583592979	4.43109015158246	4.12447183426436	4.77690865919604	4.23556354402153	4.6684765867155	4.51031667013169	0.446671534830386	4.71078930130279	3.14056575957937	0.00619102873528482	0.0151803282777131	-3.50191285248208
ENSG00000075142	6.01302535241921	5.93721762905384	6.27310116580593	6.0113697725509	6.21497158205277	6.20714407236218	6.11519272162392	5.95177677559983	5.83086426304186	5.88347899110739	5.54394199592971	5.59264403744993	5.59347477861773	5.52344938931822	0.406181197063063	5.90654660906667	4.69353321586222	0.000231174959961011	0.000981727298564362	-0.756398701291253
ENSG00000075151	5.53767652347747	5.53064294552727	5.49493789876618	5.38186832222607	5.39091246580369	5.4553119876637	5.44784866213684	5.38967006040327	5.26289197212253	5.37672018769201	5.20143460435011	5.5879268323338	5.43672579384455	5.7350515526886	0.0356355339486063	5.44497284350258	0.452307343036154	0.656993849724428	0.731054319345037	-8.07673782833409
ENSG00000075188	5.29236745040288	5.23050203002854	5.52285248715765	5.49479351412612	5.53275720707015	5.5961055544401	5.67382286666443	5.44117493211144	5.53919042910745	5.41592350019965	5.13867510498356	5.26726849020157	5.06664003335245	5.32846144062503	0.163410141481584	5.39575250289078	1.77049096751447	0.0952949265201165	0.150335003328106	-6.5654163378237
ENSG00000075213	4.47261845549901	4.1641979365703	4.20261531599948	4.23326498632606	4.40622454476747	3.82222471372602	4.30071609652988	4.00572359351205	3.8388956720698	3.22436817112089	3.88209920198722	3.52408677882692	3.689558497333	3.96348574170522	0.491499632218157	3.98071997899809	3.95020771407616	0.00110489998378454	0.00357938187453864	-2.27770833037157
ENSG00000075218	4.78165566450987	5.02257088725209	4.6909349388637	4.79145718252244	4.61022552998757	4.91436237357637	4.71144496456039	4.77873055115632	5.07790039350632	4.83223948100799	4.72538539701128	5.17461475335386	4.9986006796279	5.18293557210436	-0.175748190565836	4.8780755977886	-1.88618473855421	0.0771709667791771	0.126073535123405	-6.37124113773704
ENSG00000075223	-3.4935391217651	-1.89391444006645	-1.48644840287992	-1.75870699833373	-3.96295048799257	-2.95643228730748	-3.05212388534162	-0.42700034685318	0.000264072077035493	-2.00724725328896	-0.334561280302498	-2.16123248025343	0.905844882634256	-1.05185295506832	-1.9438558811797	-1.69142149891014	-3.62075415081113	0.00222955452557604	0.00643183411490541	-1.98422930547394
ENSG00000075234	5.1190881473561	5.48464569456899	5.5682154495667	5.43268868896204	5.29666658560839	5.52032090625625	5.3713058304413	4.39569846519171	4.21086991497026	3.77239242841245	4.37438842208544	4.47083164009466	4.47707326532559	4.37797466269097	1.09792774816134	4.84801143582363	9.75400534493926	3.20067741120234e-08	9.08052325681672e-07	8.71416835565935
ENSG00000075239	3.49257996777229	3.61100234900636	4.12045647698249	4.26162256375546	4.39261710271438	3.89050192658917	4.59322971016595	4.75406755830294	4.66812121770617	4.79565510587756	4.40315352240455	4.87862068663714	4.49053633942981	4.38782712742908	-0.584554020551822	4.33857083248381	-3.80761460056207	0.00149683415474886	0.00459353719048118	-2.50836885927507
ENSG00000075240	3.98608177676964	3.93958849401161	3.09254359914617	3.41639390754281	4.1864631965832	3.77877014832468	3.83993964421515	4.01542600242471	3.88197973953645	4.02090247263594	3.67531144414829	4.06073848540996	3.64684024724484	4.25935624146052	-0.188967133067938	3.842881099961	-1.04926564831821	0.309326288079304	0.398941427594915	-6.73367423450068
ENSG00000075275	2.51738427927579	2.87142945587891	2.89290360651257	2.59810533080067	2.41708523745386	2.39037643804373	3.14919141213652	1.95085208425439	1.43898477360338	2.34823110274124	2.40382801222662	2.74619011076616	2.7794860102763	2.3380183817076	0.40155906605662	2.48871901683412	2.11613684759535	0.0500161026330619	0.0880072264199793	-5.69971841603098
ENSG00000075292	5.17719853098857	4.62379531809921	4.74111398685187	4.76573377749947	4.67684569192976	4.70681995639935	4.70738138921258	4.77095599958066	4.71459757810506	5.12967575341037	4.62691050159479	5.08026273620484	4.95636499907997	5.11633701562846	-0.142434658684082	4.84242808818464	-1.3978318733313	0.180850424644304	0.256273200412834	-7.20516812545416
ENSG00000075303	1.92481896942782	1.9661697680085	1.87024219658528	1.62072771192097	1.91066989479461	1.37192420112882	1.29432032436462	2.74323924562478	2.54508133906914	2.13178384013132	2.73118996092525	3.19313824006456	2.46612359260612	3.03049748786922	-0.988630934473085	2.19999476946579	-5.54173599052015	4.1364523922197e-05	0.000238827144524222	1.60054405728411
ENSG00000075336	6.51896102458345	6.36513240408802	6.48766452537029	6.6860103759992	6.45189877500384	6.77243110993891	6.71854082029592	5.83631773287327	5.83131187555626	5.81018436055933	5.36835145178085	5.25175692247884	5.56609343966002	5.48418421272852	0.977475578345501	6.08205993077977	9.10110724393515	8.40571110067138e-08	1.86349562488655e-06	7.58455753623513
ENSG00000075340	6.11210575896799	6.13968675784728	5.98363624567497	5.68892543006328	6.08223474508784	5.84526692334245	5.87184369305591	5.98894269333414	5.98017145698682	5.52484140784732	6.14544554375166	6.32076066999094	5.74609554629325	6.0346749136271	-0.00258876865705115	5.9617594132765	-0.0234132063015189	0.981604178638395	0.986588361553055	-8.19603771419271
ENSG00000075391	3.6682400648492	3.25087820022051	2.94546121350382	2.57418037475808	2.72150033455354	2.56316297127228	2.86446591870006	2.95993320809787	2.78126424320513	2.8199835181684	3.16721237803583	3.17560523907856	3.81922394075513	3.33472343650334	-0.214239577410861	3.04613107440727	-1.15673411951974	0.264010725187684	0.350068039683985	-7.24358319560789
ENSG00000075399	1.86812165078421	2.0046639908039	2.58620878014514	2.87748146936952	1.99644965729581	2.02925075690377	2.05527564754908	1.68278380219065	1.50425291191495	1.7685221051055	1.54546748827826	0.901762893778993	2.02731078568442	2.04946695070794	0.561504511184488	1.92121563503658	2.73036986316813	0.0146130557607212	0.0312575574101472	-4.13724796582461
ENSG00000075413	5.41908392507631	5.32223162210956	5.39889733826713	5.45545243736385	5.4996243898308	5.4761612186113	5.47115320988765	5.7801297053884	5.79355223786311	5.77640994642031	5.49986911122669	5.73226425495823	5.47120830061278	5.65549275490898	-0.238800560058584	5.55368074660894	-3.41340628072727	0.00346879896500497	0.00928292704553112	-3.47350826545646
ENSG00000075415	7.48231918754502	7.65069325712448	7.74371944645626	7.77162637941775	7.64469244098072	7.82589409116739	7.58820985909902	7.85473904237814	7.82290852608848	7.65219011371637	7.68435603327613	7.75835025279122	7.65420188790829	7.587296577062	-0.0440660773206858	7.69437122107223	-0.657272499307569	0.520156227827413	0.609670786680224	-8.0194926662412
ENSG00000075420	3.35339603401992	2.70550622041194	2.62931696430941	2.48141559122023	2.5506051730274	2.43375395963706	2.5337922334058	2.77323958863882	2.85210612142394	2.59445412234049	2.77283885016371	3.06631090161361	3.40888454548622	3.06546568248011	-0.268288051210262	2.80150614201276	-1.85373452267164	0.0819175493225962	0.13267045812446	-6.40519653400137
ENSG00000075426	0.611944106655208	-0.290887660744025	0.495515176880587	-0.0078771354280851	0.0199878810305232	0.347136309554111	0.431757491972223	0.450306551531997	1.2974783392623	0.97892050487885	0.536652419998116	1.27859367381564	3.04407073368504	0.152301505221851	-0.900422703296073	0.667564278451024	-2.36300340308607	0.0308325102086165	0.0584344767351145	-4.72562976072514
ENSG00000075539	1.99152387674772	2.1716284411212	1.60360499687066	1.74784052484285	1.60953660678712	1.83529400310097	1.80281794067824	2.36332576369553	2.42040399007241	2.42765479987387	2.42874225397393	2.83158624379934	2.51945122371608	2.58500493840148	-0.685072810298927	2.16702968597724	-6.79908380938548	3.82083843801054e-06	3.55802789816575e-05	3.59231849953052
ENSG00000075568	3.98364231087584	3.91549349025395	4.00776137660785	3.65361226394099	3.74753404435845	3.64484715612612	3.78320429624265	3.6143656633053	3.51904022611472	3.8541491781232	3.59296467862067	3.76389138673282	4.1818049155679	4.08209938277117	0.0174472509526642	3.81031502640297	0.158152952119124	0.876274068086593	0.908830991280947	-8.04447271159234
ENSG00000075618	1.96885364526294	1.57532241866684	1.80055324452176	1.84388975991302	2.33766526461991	2.28014689163066	2.13141171270362	1.77754351969145	1.67681912037953	2.27646700991806	1.1512565991027	1.20206087021879	1.56673872656713	1.28052467943114	0.425442937166003	1.77637524733054	2.03527462192728	0.0583749007865981	0.099904082818632	-5.15763092009327
ENSG00000075624	11.0818519981302	11.3788023353436	11.2944296493611	11.352229837069	11.3249713605063	11.6010384667998	11.2649925479276	10.9865960563309	11.0894456900266	11.4281780187681	11.0717674064517	11.3578898734488	11.3033384510751	10.7646203197833	0.185350268304832	11.2357251436444	1.85070539761477	0.0823735815788993	0.133302600903707	-6.65953502697909
ENSG00000075643	0.827043339778577	0.583516221289743	0.81273841794065	0.616402133188376	0.533961503150128	1.22002311514101	0.448142743168366	3.39708666336245	3.25299297958661	2.9026045030169	3.79699400504875	4.05687996457236	4.47414271875877	3.69208755645141	-2.93527658607103	2.18675827603243	-10.7344909476369	8.17267915580105e-09	3.17794498419344e-07	10.4494622539692
ENSG00000075651	0.866133044316742	-0.950145153142778	-1.3908381093441	-0.175015728305678	-1.59336943302599	-0.71722906349135	-0.715806924988744	-1.63712557910501	-1.03988203302808	0.0742983496444123	-1.07622271180046	-1.43873312860782	-0.362615686418382	-0.903066267308344	0.258690480985387	-0.789972744614684	0.735979946201866	0.472175582772731	0.563361338881179	-6.9578512077261
ENSG00000075673	-3.50387613308195	-2.51665228591925	-2.69674331669565	-3.91233491645178	-3.96301885421164	-2.98557570214781	-3.64369781213487	0.546929104308352	-0.00809341009750142	0.160380418800532	0.360486256695706	0.585524484431278	-1.03559594899219	-0.252318851318469	-3.35050967545798	-1.63318478334395	-9.29874905974808	6.24388338497302e-08	1.49228610994509e-06	8.60563165892637
ENSG00000075702	5.11657637301759	5.2413983101345	5.09368690428257	5.21757140896422	5.38192176680385	5.28303505238286	5.10062089066965	4.82842562277186	4.78667700498741	4.73813373856988	4.96616152674934	4.87874254663755	4.98356979321391	5.11853610327899	0.305636414564331	5.05250407446173	4.07894821549669	0.000840542938828329	0.00285362569274187	-2.03410491370021
ENSG00000075711	3.97939443445978	3.97548146751352	3.59458295770466	3.90386492560254	3.69160450137423	3.64903000635016	3.67707435205019	3.94130747096543	3.81369082733648	4.11770357426175	3.94401620555179	4.26310753162071	4.44978790139696	4.19802691392928	-0.323952893483854	3.94276236215125	-3.13109637201585	0.00631623855726319	0.0154212516510432	-4.04611425224491
ENSG00000075785	7.14685960221645	7.1923833573162	7.02896784693696	7.17211722648505	6.9587045339434	7.20374764459821	7.05576108660988	7.56109308087053	7.38556388487676	7.62428716691847	6.91158774349547	7.08483864461517	6.90594625652221	7.00965311624147	-0.10359760893804	7.16010794226044	-0.906591507375326	0.377796731667882	0.470015743752406	-7.77357195253187
ENSG00000075790	2.67947698991293	2.75916512510727	2.63792248998291	2.46780717857413	2.53416717722142	2.21657328229632	2.50559931359208	2.45852092112947	2.51264652223006	2.49181578348939	2.21335851041315	2.38450836403381	2.82774271341443	2.55761576925338	0.0433365446714955	2.51763715290362	0.41009461349049	0.687062472330212	0.756010971045205	-7.81250932616541
ENSG00000075826	1.09952573402758	1.42187180916102	1.27699386440267	1.47963153595405	1.37774518666305	1.80224322247119	1.35909249948932	2.43091863070629	1.02132895352011	1.42381414307636	0.362025378000337	0.736943918975896	0.171147822269643	0.648436939069831	0.419018687251965	1.1865514026991	1.5440627839075	0.141715691321375	0.209094639237781	-6.43707193206633
ENSG00000075856	5.56129783344417	5.2794253271352	5.29646935432692	5.27257069791717	5.40884112937143	5.22670932621794	5.36431286635783	5.18179041699825	5.28485826973552	4.99681779466198	5.41133727493896	5.40785744809648	5.37011743739441	5.53645786861924	0.0313523891462726	5.32849021751539	0.375390557477811	0.712197810809272	0.776786410552885	-8.10230754987842
ENSG00000075914	5.18825768875794	5.43970166426984	5.51813760785826	5.64853989739963	5.6187551741338	5.77684553397749	5.53238229859921	6.15937616347672	5.95799404795851	5.81423924511031	5.45588240181457	5.61317275812953	5.32252871636469	5.16152448919476	-0.111203050864758	5.58623840621752	-0.791314525232415	0.440095134335883	0.531987702083322	-7.81107843863525
ENSG00000075945	0.325211752809449	0.632021555623467	0.296136499378497	0.256137042562171	0.655596424846521	-0.0675681851761922	0.2227675216071	0.408997441666191	-0.183493532232412	0.464041993775962	0.430392171065716	0.546670020930105	1.06508166743203	1.27294505531513	-0.246474157989212	0.451781244971695	-1.20014829795285	0.247191286914889	0.331558866325889	-6.67432340642619
ENSG00000075975	4.63664764483886	4.81237206209393	4.78524608618324	4.68728037238015	4.66622375112287	4.81075971923096	4.70343659457634	4.3990850668953	4.53869111010252	4.4339288233253	4.53355855318382	4.55487990860011	4.13983814263886	4.53301990794424	0.288281363104253	4.58821198165118	3.48166187335333	0.00299934152975061	0.00821814177365931	-3.10892335831183
ENSG00000076003	7.26055683153122	7.23964120807248	7.31577451002021	7.20575714390834	7.22441389604881	6.90366500805922	7.27418381180466	6.8284582770278	6.92792156578746	6.4593414484707	7.20078565097871	6.95641294896856	6.88178581030938	6.94573907372064	0.317207142934562	7.04460265605059	3.28698840599556	0.00453901020252449	0.0116499985607182	-3.79667069857447
ENSG00000076043	4.50458139966719	4.4193237980973	4.802554886325	4.67787957485071	4.63219668969627	4.86564741087492	4.56626434086369	5.06063763329116	5.35616886693622	5.51263726945607	4.85572905230368	4.68905978241296	5.337638648175	5.05360860847212	-0.483906722011008	4.88099485438731	-3.95554275935495	0.00109243446592604	0.00354844405785584	-2.27324519577759
ENSG00000076053	3.48258067240834	3.47235667126382	3.40532028232107	3.20856742882042	3.20891271809759	3.28675050293316	3.37506181080447	4.1611206142937	3.98514192483011	4.27006940548852	3.8645352984487	3.86266658778254	4.04631383187822	3.94112554078843	-0.670211554880839	3.68360880643993	-7.74949769181934	7.27715407040164e-07	9.83021555947374e-06	5.36688509132656
ENSG00000076067	1.37149463162311	1.37322906722441	1.27263378441793	1.11238770523651	1.39366582208282	1.2938184264087	1.72740088217101	2.34786151818259	3.17990286770058	2.50710230574783	2.60054746459639	2.6542748299067	4.08175614359305	2.67014901126533	-1.51016057076084	2.11330174715407	-5.64741114766088	3.35859084218141e-05	0.000202865554045608	2.03779511989273
ENSG00000076108	6.06397492724015	5.81429000409289	5.3035940429206	5.1293724742202	5.28211992142022	4.89984023515491	5.25384661353937	4.34448777221601	4.45350127313745	3.94262602470978	5.27677872444462	5.17628866255233	5.33436160012077	5.37653193295074	0.549275420684246	5.11797244348	2.34839435580735	0.0317424350184152	0.059971620088347	-5.65490209244053
ENSG00000076201	4.41256407085759	4.50690543312773	4.55018753644386	4.57933054032787	4.63317405925168	4.8398537192533	4.42376239275261	4.82966875718183	4.80538311602318	4.86967036535051	4.90263022411993	4.88073115128673	4.86004079111101	4.8836634122825	-0.296452246069753	4.71268325495502	-4.24029827311462	0.000597357923418121	0.0021427772725971	-1.70375861056284
ENSG00000076242	5.23964728310314	5.13709455750612	5.29126303371915	4.89962153827939	5.18553558740827	5.04703339675995	5.21466109674337	4.92254621707798	4.88306565775774	4.61312832890354	5.18439429803875	5.20415734364507	5.45096200708326	5.42271817151907	0.0465084215927254	5.12113060839606	0.386037926866489	0.704448052082694	0.770784201585839	-7.98639519288004
ENSG00000076248	7.75968080702139	7.58620645216108	7.70644351655325	7.7206376557732	7.99708963779465	7.50305121162351	7.76400825175737	7.51254872022294	7.30993369677638	7.20471335285616	7.52049873522784	7.41707726160539	7.45799667608789	7.49715617781187	0.300906239954289	7.56836015380521	3.80200101159421	0.00151484846255288	0.00463712792699474	-2.70542972207853
ENSG00000076258	-0.845599777242913	-0.29273015304093	-0.769737473288704	-0.438236269636938	-0.31724605547015	-0.719196420256625	-0.539669585705741	0.932217417083469	1.13237296406247	1.34650437532585	0.235563923737531	0.589258648943768	-0.674522780914839	0.251443366517227	-1.1015167610118	-0.00782698713475168	-3.75085285067044	0.00168935134802292	0.00508560357575734	-1.81830078687061
ENSG00000076321	2.70010440513202	2.410000868336	2.75568168623786	2.69387626955813	2.73301637140144	2.46043393727217	2.70303435233771	2.54521059759882	2.56274178977388	2.43207981133787	2.49854546078988	2.25202502905193	3.09828054946614	3.08739538378721	-0.00833990903774184	2.63803046514865	-0.0603248997916269	0.952628452601987	0.964916852248567	-7.73747385038228
ENSG00000076356	-1.53871985427968	-1.80170451599036	-2.79923935118038	-1.39275157005727	-2.26210502426001	-1.90528424931983	-2.13292021214491	-1.54242644620585	-0.824037071311442	-0.941746486500155	-1.2650273826968	-1.58911783144706	-0.476244033535676	-1.70292756928872	-0.786635019712366	-1.58387511415844	-3.20759401289881	0.00537191302201283	0.0134419312070144	-3.09631708952408
ENSG00000076382	6.167368550553	6.48263232059662	6.47670931377769	6.2232621626302	6.15135846883807	6.16205268016955	6.3375212074385	6.17230038228694	6.22150137879157	6.05545680220409	6.29472745720575	6.45659404283106	6.09001197773182	6.14297392863641	0.081210421216519	6.24531933383509	1.0039998807403	0.330014112959118	0.42071873560547	-7.66090972821882
ENSG00000076513	2.17169791338204	2.40536138829665	2.27089204932845	2.02520180544383	2.12073388864531	2.089738102741	2.24317915804836	2.3169220688222	2.19322151541884	2.35387022239545	2.3187988246619	2.31689285267151	2.28854552568981	2.04566502987558	-0.0734362966755451	2.22576573895864	-0.856443457211759	0.404136448027462	0.495641345117114	-7.47076581592832
ENSG00000076554	2.48008225752531	2.81118530639593	2.94344529453908	2.79278649842276	2.61195245721833	2.90264244854167	3.05529497461292	3.59258044912349	3.98402267645741	3.41224422486553	3.20229106265644	3.26288806085378	3.1497428394725	3.12183793015182	-0.589323734757483	3.09449974863121	-4.29535566646823	0.00053184015071627	0.00195601967385072	-1.37720176526751
ENSG00000076555	0.908697167031491	1.72548741649968	1.15380949534853	1.26026577638441	1.18392973052185	1.56607219479256	1.35049242426108	1.21610933377254	1.15475916644787	1.41059214810797	1.80772853228948	1.62177902083928	1.03062777657958	1.7102258174314	-0.094171105641524	1.36432685716484	-0.624143548157783	0.54114904749145	0.628597433620749	-7.55269313364955
ENSG00000076604	6.28237987623514	6.81695073329409	6.39396200842607	6.69181182880559	6.3900853820243	6.86380235860442	6.50443708638916	6.62789584398149	6.36319432431016	6.50201083863961	6.34287918790116	5.97621176589038	5.87079392702613	6.02147795505496	0.321390848497088	6.40342093689876	2.49874238059798	0.0234745822144467	0.0466845000215736	-5.3786580260435
ENSG00000076650	3.16805501623854	3.20560278127607	3.14163426664447	3.03890742957044	3.32929608588506	3.47532149661062	3.17349068879597	3.10785826251975	3.03720172782712	3.22583013899148	2.77374453122187	2.59301496925875	3.11908832636478	3.10867961287802	0.226785474430721	3.10698038100592	2.01390202717606	0.0607869753202634	0.103199648015473	-5.85683028994293
ENSG00000076662	3.73624031196935	3.57927575671103	3.08370572318145	4.5562711761341	2.95358917895302	4.12658167002137	5.50483541976065	4.34438169020179	4.13949323119418	4.61476958451405	4.65788042044516	3.56569507138219	3.57834674759855	4.05137003303811	-0.183206973103705	4.03517400107893	-0.566549520726698	0.578718897304652	0.663050710636818	-7.55265830684064
ENSG00000076685	3.63362036597179	3.70970897352573	3.50315901702613	3.95275622254423	3.9843296825382	4.05016292559679	3.65507899325294	4.6665604787966	5.39596842062755	5.22077919983849	4.98444729167049	4.6843183654579	5.27547529625949	3.9999227665858	-1.10620400366018	4.33687771426372	-6.02672429166716	1.60934334186757e-05	0.000112377038519048	2.01402566743606
ENSG00000076706	2.72887974669427	2.69276613082721	2.12572967851088	2.65771342635422	1.96297202069615	2.80287498958632	2.41838033278944	3.22372568231722	3.40107235900629	3.97763303002251	3.21181856053832	2.69230908859214	5.25664437841421	2.78358777415567	-1.02474259786519	2.99543622846463	-3.0320430650685	0.00778434441846871	0.0184253706567839	-4.06680089026487
ENSG00000076716	8.49982082895741	7.43778375142587	8.04840354682165	8.50532463867471	8.16604006777574	7.76824912822232	8.01250169079191	8.14167095207275	7.93705896300344	8.63134531376392	8.2628979903214	8.72333644065024	8.93142661551154	8.25047087017781	-0.35159984965061	8.23688077129791	-2.00242832026768	0.0621187906680999	0.105065008507705	-6.33044180997317
ENSG00000076770	0.20430808234641	1.09522201386517	-0.282798547416617	0.347402720428023	0.11911422859345	-0.363704446829615	-0.0335991734976506	0.339429827989852	-0.561419729148487	-0.0396526316966419	-0.103499011661573	-0.0108557334584569	-1.01405891357626	0.21783316901554	0.324612021704513	-0.0061627246462039	1.34896248709241	0.195745216940909	0.274029794730596	-6.6670025240078
ENSG00000076826	3.99008762950647	3.94441186289042	3.81477837439933	3.70874277351925	3.5832680034819	3.93032752878401	3.78967974056893	3.82184722322567	3.86461005992998	4.12623642773611	4.03900950143881	3.84609940496979	4.15192823302759	4.09940201365846	-0.162994937368443	3.90788776979548	-1.84342326458692	0.083479117075944	0.134804873813363	-6.34435448702024
ENSG00000076864	2.4780931918898	3.00988874730018	2.80464241150721	3.25613410152344	2.59106663399324	3.33534920128842	2.98762332158288	2.78757696112631	2.80217663740868	3.01705673424955	2.90517802176947	2.59070285681745	2.09706850947225	2.21412123750919	0.306156556432131	2.77690561195986	1.82597592368651	0.0861814639464201	0.138288015516398	-6.24006560276388
ENSG00000076924	5.39343906628803	5.65615313172946	5.74341640147245	5.79289296339479	5.63126791925365	5.9769576992133	5.6589020770706	5.96705752009374	6.15332072888564	5.92135865497181	5.8034707455798	5.82171985669899	5.58401976042741	5.83418827246872	-0.173831272232315	5.78129748553917	-1.81663151168668	0.08766031873533	0.140327994124385	-6.53136203963042
ENSG00000076944	5.16240776142042	5.60052991649846	5.7606283704716	5.76077357746187	5.54487730247118	5.77351174104096	5.72152023743988	5.37436934956007	5.41850940023685	5.52099477107014	5.53256478506264	5.35570240708923	5.14977236309705	5.26067686450971	0.249076932320795	5.49548848910215	2.45933392138347	0.0254192602926386	0.0498835564369081	-5.29265872556616
ENSG00000076984	4.86440999321717	4.79709768825219	4.83300300181964	4.74512674057809	4.74700226773359	4.70352608047175	4.57250764417483	3.90612521138886	3.72574578130102	3.47165399255682	4.36610945516654	4.21334992803147	4.3865593137116	4.55657422516159	0.663942110135962	4.42062795168323	4.70771108973071	0.000224475410439838	0.000960312907016966	-0.448565318978684
ENSG00000077009	6.81412322531386	6.98665552953515	7.04332245112428	6.19598664338955	8.10862046737458	7.34630358915857	7.25820653849664	6.99377048839364	7.10674401134414	7.7979147827592	6.22222339390498	7.06813246255843	7.53849047888428	6.67555129961126	0.0379344874260354	7.08257466870347	0.14892154010788	0.88343778900013	0.914305782084878	-7.94935339369223
ENSG00000077044	2.88086613983947	3.00354682514548	2.60556719936551	2.4689911652949	2.3808623838664	2.10857888849982	2.52201871154902	2.56026708739427	2.57175465158063	2.7698329130259	2.63999557377194	2.98134024340531	2.90140940425623	3.0178591429769	-0.211507096147286	2.6723493092837	-1.56635869106287	0.136421874775161	0.202907324683916	-6.62246403348107
ENSG00000077063	3.54162031015507	2.99420924057643	3.31995451380495	2.66813388860763	3.46317404824904	3.09940611501651	3.37579867924017	3.08857280865414	2.86393322714468	2.8655484165278	3.40675054513855	3.22378394506093	3.85183628830574	3.12361758418623	-0.00105386814634434	3.2061671150477	-0.00656809129662281	0.994838971428444	0.996410478900385	-8.00141910803782
ENSG00000077080	0.575092280953222	-0.295105510324091	0.446927559825391	0.928729389469197	1.03059750666729	1.13600461505536	0.791394513047279	0.206134541302714	0.0554043599379177	-0.661085081270329	-0.0765361843443697	-0.785403815710804	-0.932258096494282	-1.69880504815678	1.20209578816678	0.0515065021398366	4.03037543843701	0.000931817089644424	0.00310631218791079	-1.21505149074293
ENSG00000077097	6.85285912862669	6.89209655834528	6.74879659328645	6.73276866704667	6.86565147427048	6.80368665681456	6.94458568646003	6.93376560983124	6.8533883494525	6.99562106642599	6.96040277411925	7.22775687295665	6.58401490762545	6.71324167099357	-0.0610485339391538	6.86490257258963	-0.715595686829779	0.484340856871601	0.575169535465338	-7.96010384043005
ENSG00000077147	6.66678477551064	6.44365833987079	6.22839446598919	5.97962812556558	6.18059191794671	5.76534413387157	6.1667907497403	6.18373490321484	5.84577300183394	5.93753784804163	6.58646853212787	6.52736793800717	6.84409439798225	6.64520351760394	-0.164109475793114	6.28581233195046	-1.00063831039142	0.331588729838024	0.422372206264636	-7.62848094782957
ENSG00000077150	3.58161400909226	3.40906347940313	2.96740098023044	3.62433168190243	3.12759652194605	3.76137251582479	3.24027026981127	3.80829913004292	3.686904145956	4.07002191228272	3.54135632160223	3.74320266558786	2.83933428304929	3.08423851736159	-0.143107380321874	3.46321474529236	-0.77855702772125	0.44736789799505	0.539100464009679	-7.51771455877483
ENSG00000077152	5.5040872633926	5.41855810698835	5.80393025881598	5.8376114376187	5.8816574010039	6.03208837802922	5.63599046756531	7.13033726097922	7.0590355917073	7.08639084676935	6.67293807894993	6.8499316976179	6.3477051640216	6.78304201934196	-1.11541686236274	6.28880742662867	-8.33941624316094	2.75931905813048e-07	4.64504457213085e-06	6.36299987868916
ENSG00000077157	0.872742946087732	0.61620940766417	0.106011368596566	0.279865121208296	-0.106933050605523	-0.430394657742499	0.272134543949989	-0.00204761302648326	0.321635923670125	-0.775173695899203	1.01782945853676	0.848701134718098	0.95897047521148	1.38412752111666	-0.305836021017222	0.383119920249012	-0.996704414230913	0.333438170838415	0.424239596202629	-6.72944917251622
ENSG00000077232	5.19573188030986	4.71343710017898	4.47385040565918	4.13916535992331	4.42457004491601	3.97039748156931	4.36366712130967	5.52664822087286	5.43307115947824	5.66346944290286	5.53067907018108	5.47992285867116	5.99380829474202	5.88745083170944	-1.17748713958922	5.05684780517314	-7.67206354573793	8.29250852968272e-07	1.09704479689966e-05	5.04904880849206
ENSG00000077235	6.1503990181583	6.01021616445939	5.95201027460525	5.8084489485893	5.77900314107983	5.75762559502592	5.8706656589345	5.38489003181243	5.42198243733109	5.25900870270308	5.93424856194774	5.74422630724687	6.24467563378403	6.15353534561754	0.169873616962977	5.81935255866395	1.18706322208093	0.252172195986568	0.337064224092047	-7.47232013820968
[truncated: 11,084 more rows]
