# Supplementary material for: A panel of induced pluripotent stem cells from chimpanzees: a resource for comparative functional genomics
Source: eLife journal article supplement (doi:10.7554/elife.07103), 2015-06-23
Supplement: supp [file elife-07103-supp-v1.zip › elife_poa_e07103_Supplementary_File_5.txt]

GO.ID	Term	Annotated	Significant	Expected	classicFisher	BH
GO:0005996	monosaccharide metabolic process	216	110	80.23	2.1e-05	0.12222
GO:0033555	multicellular organismal response to str...	38	26	14.11	8.8e-05	0.16005
GO:0019318	hexose metabolic process	199	100	73.91	9.4e-05	0.16005
GO:0005975	carbohydrate metabolic process	602	267	223.6	0.00011	0.16005
GO:0006006	glucose metabolic process	172	86	63.88	0.00035	0.307628571428571
GO:0003085	negative regulation of systemic arterial...	8	8	2.97	0.00036	0.307628571428571
GO:0007200	phospholipase C-activating G-protein cou...	23	17	8.54	0.00037	0.307628571428571
GO:0048265	response to pain	18	14	6.69	0.00053	0.3492
GO:0003018	vascular process in circulatory system	81	45	30.09	0.00054	0.3492
GO:0046364	monosaccharide biosynthetic process	58	34	21.54	0.00070	0.376061538461538
GO:0044723	single-organism carbohydrate metabolic p...	471	208	174.94	0.00081	0.376061538461538
GO:0035150	regulation of tube size	67	38	24.89	0.00084	0.376061538461538
GO:0050880	regulation of blood vessel size	67	38	24.89	0.00084	0.376061538461538
GO:0046365	monosaccharide catabolic process	75	41	27.86	0.00144	0.57424
GO:0045776	negative regulation of blood pressure	21	15	7.8	0.00148	0.57424
GO:0016051	carbohydrate biosynthetic process	132	66	49.03	0.00162	0.575533333333333
GO:0030855	epithelial cell differentiation	280	128	104	0.00176	0.575533333333333
GO:0071347	cellular response to interleukin-1	29	19	10.77	0.00178	0.575533333333333
GO:0019319	hexose biosynthetic process	54	31	20.06	0.00190	0.582
GO:0006094	gluconeogenesis	50	29	18.57	0.00213	0.61983
GO:0006954	inflammatory response	255	117	94.71	0.00232	0.642971428571429
GO:0007635	chemosensory behavior	6	6	2.23	0.00262	0.662973913043478
GO:0045634	regulation of melanocyte differentiation	6	6	2.23	0.00262	0.662973913043478
GO:0072527	pyrimidine-containing compound metabolic...	53	30	19.69	0.00300	0.712368
GO:0048483	autonomic nervous system development	22	15	8.17	0.00306	0.712368
GO:0019320	hexose catabolic process	71	38	26.37	0.00348	0.748285714285714
GO:0006952	defense response	731	306	271.51	0.00358	0.748285714285714
GO:0002526	acute inflammatory response	45	26	16.71	0.00382	0.748285714285714
GO:0060487	lung epithelial cell differentiation	13	10	4.83	0.00416	0.748285714285714
GO:1901985	positive regulation of protein acetylati...	13	10	4.83	0.00416	0.748285714285714
GO:2000758	positive regulation of peptidyl-lysine a...	13	10	4.83	0.00416	0.748285714285714
GO:1901566	organonitrogen compound biosynthetic pro...	465	200	172.71	0.00446	0.748285714285714
GO:0002532	production of molecular mediator involve...	15	11	5.57	0.00482	0.748285714285714
GO:0046006	regulation of activated T cell prolifera...	15	11	5.57	0.00482	0.748285714285714
GO:0042311	vasodilation	35	21	13	0.00495	0.748285714285714
GO:0006007	glucose catabolic process	61	33	22.66	0.00503	0.748285714285714
GO:0071356	cellular response to tumor necrosis fact...	61	33	22.66	0.00503	0.748285714285714
GO:0050932	regulation of pigment cell differentiati...	8	7	2.97	0.00525	0.748285714285714
GO:0006096	glycolysis	48	27	17.83	0.00536	0.748285714285714
GO:0090066	regulation of anatomical structure size	231	105	85.8	0.00536	0.748285714285714
GO:0043207	response to external biotic stimulus	317	140	117.74	0.00540	0.748285714285714
GO:0051707	response to other organism	317	140	117.74	0.00540	0.748285714285714
GO:0032480	negative regulation of type I interferon...	27	17	10.03	0.00567	0.767427906976744
GO:0034612	response to tumor necrosis factor	75	39	27.86	0.00596	0.77212
GO:0009636	response to toxic substance	91	46	33.8	0.00597	0.77212
GO:0007015	actin filament organization	196	90	72.8	0.00679	0.821784
GO:0010614	negative regulation of cardiac muscle hy...	5	5	1.86	0.00706	0.821784
GO:0010758	regulation of macrophage chemotaxis	5	5	1.86	0.00706	0.821784
GO:0014741	negative regulation of muscle hypertroph...	5	5	1.86	0.00706	0.821784
GO:0043117	positive regulation of vascular permeabi...	5	5	1.86	0.00706	0.821784
GO:0009607	response to biotic stimulus	337	147	125.17	0.00759	0.866152941176471
GO:0009605	response to external stimulus	1070	434	397.42	0.00798	0.887339130434783
GO:0071345	cellular response to cytokine stimulus	278	123	103.26	0.00813	0.887339130434783
GO:0006805	xenobiotic metabolic process	65	34	24.14	0.00880	0.887339130434783
GO:0071466	cellular response to xenobiotic stimulus	65	34	24.14	0.00880	0.887339130434783
GO:0065004	protein-DNA complex assembly	88	44	32.69	0.00903	0.887339130434783
GO:0072528	pyrimidine-containing compound biosynthe...	30	18	11.14	0.00907	0.887339130434783
GO:0050731	positive regulation of peptidyl-tyrosine...	63	33	23.4	0.00951	0.887339130434783
GO:0032101	regulation of response to external stimu...	299	131	111.06	0.00952	0.887339130434783
GO:0060479	lung cell differentiation	14	10	5.2	0.00971	0.887339130434783
GO:0014003	oligodendrocyte development	26	16	9.66	0.00986	0.887339130434783
GO:0006206	pyrimidine nucleobase metabolic process	24	15	8.91	0.01018	0.887339130434783
GO:0050931	pigment cell differentiation	24	15	8.91	0.01018	0.887339130434783
GO:0032755	positive regulation of interleukin-6 pro...	16	11	5.94	0.01026	0.887339130434783
GO:0043388	positive regulation of DNA binding	22	14	8.17	0.01042	0.887339130434783
GO:0060428	lung epithelium development	22	14	8.17	0.01042	0.887339130434783
GO:0061418	regulation of transcription from RNA pol...	22	14	8.17	0.01042	0.887339130434783
GO:0030279	negative regulation of ossification	18	12	6.69	0.01052	0.887339130434783
GO:0050798	activated T cell proliferation	18	12	6.69	0.01052	0.887339130434783
GO:0019233	sensory perception of pain	39	22	14.49	0.01099	0.912285
GO:0006082	organic acid metabolic process	716	295	265.94	0.01119	0.912285
GO:0008217	regulation of blood pressure	82	41	30.46	0.01146	0.912285
GO:0009410	response to xenobiotic stimulus	66	34	24.51	0.01177	0.912285
GO:0006575	cellular modified amino acid metabolic p...	127	60	47.17	0.01210	0.912285
GO:0044283	small molecule biosynthetic process	306	133	113.66	0.01228	0.912285
GO:0002483	antigen processing and presentation of e...	7	6	2.6	0.01250	0.912285
GO:0009595	detection of biotic stimulus	7	6	2.6	0.01250	0.912285
GO:0014850	response to muscle activity	7	6	2.6	0.01250	0.912285
GO:0030730	sequestering of triglyceride	7	6	2.6	0.01250	0.912285
GO:0060359	response to ammonium ion	35	20	13	0.01254	0.912285
GO:0043436	oxoacid metabolic process	710	292	263.71	0.01283	0.921859259259259
GO:0016052	carbohydrate catabolic process	104	50	38.63	0.01417	0.999670588235294
GO:0044711	single-organism biosynthetic process	988	399	366.97	0.01454	0.999670588235294
GO:0051047	positive regulation of secretion	116	55	43.09	0.01454	0.999670588235294
GO:0006333	chromatin assembly or disassembly	90	44	33.43	0.01460	0.999670588235294
GO:0006334	nucleosome assembly	60	31	22.29	0.01496	1
GO:0097306	cellular response to alcohol	40	22	14.86	0.01599	1
GO:0006448	regulation of translational elongation	9	7	3.34	0.01601	1
GO:0023058	adaptation of signaling pathway	9	7	3.34	0.01601	1
GO:0032232	negative regulation of actin filament bu...	9	7	3.34	0.01601	1
GO:0042104	positive regulation of activated T cell ...	9	7	3.34	0.01601	1
GO:0048266	behavioral response to pain	9	7	3.34	0.01601	1
GO:0044724	single-organism carbohydrate catabolic p...	100	48	37.14	0.01657	1
GO:0046134	pyrimidine nucleoside biosynthetic proce...	25	15	9.29	0.01682	1
GO:0061005	cell differentiation involved in kidney ...	25	15	9.29	0.01682	1
GO:0042312	regulation of vasodilation	23	14	8.54	0.01763	1
GO:0035066	positive regulation of histone acetylati...	11	8	4.09	0.01808	1
GO:0048485	sympathetic nervous system development	11	8	4.09	0.01808	1
GO:0060004	reflex	11	8	4.09	0.01808	1
GO:0030318	melanocyte differentiation	21	13	7.8	0.01838	1
GO:0014823	response to activity	19	12	7.06	0.01899	1
GO:0032890	regulation of organic acid transport	19	12	7.06	0.01899	1
GO:0035850	epithelial cell differentiation involved...	19	12	7.06	0.01899	1
GO:2000179	positive regulation of neural precursor ...	19	12	7.06	0.01899	1
GO:0070555	response to interleukin-1	45	24	16.71	0.01930	1
GO:0007417	central nervous system development	510	212	189.43	0.01934	1
GO:0046653	tetrahydrofolate metabolic process	17	11	6.31	0.01940	1
GO:0016053	organic acid biosynthetic process	203	90	75.4	0.02002	1
GO:0046394	carboxylic acid biosynthetic process	203	90	75.4	0.02002	1
GO:0001817	regulation of cytokine production	248	108	92.11	0.02099	1
GO:0051241	negative regulation of multicellular org...	189	84	70.2	0.02243	1
GO:0071822	protein complex subunit organization	930	374	345.42	0.02292	1
GO:0015844	monoamine transport	30	17	11.14	0.02295	1
GO:0032609	interferon-gamma production	30	17	11.14	0.02295	1
GO:0048066	developmental pigmentation	30	17	11.14	0.02295	1
GO:0002064	epithelial cell development	85	41	31.57	0.02324	1
GO:0033002	muscle cell proliferation	64	32	23.77	0.02375	1
GO:0008015	blood circulation	222	97	82.46	0.02504	1
GO:0042752	regulation of circadian rhythm	24	14	8.91	0.02807	1
GO:0009615	response to virus	161	72	59.8	0.02812	1
GO:0001816	cytokine production	278	119	103.26	0.02819	1
GO:0003013	circulatory system process	223	97	82.83	0.02846	1
GO:0008154	actin polymerization or depolymerization	110	51	40.86	0.02897	1
GO:0001820	serotonin secretion	6	5	2.23	0.02925	1
GO:0002031	G-protein coupled receptor internalizati...	6	5	2.23	0.02925	1
GO:0002726	positive regulation of T cell cytokine p...	6	5	2.23	0.02925	1
GO:0006560	proline metabolic process	6	5	2.23	0.02925	1
GO:0006734	NADH metabolic process	6	5	2.23	0.02925	1
GO:0006855	drug transmembrane transport	6	5	2.23	0.02925	1
GO:0009157	deoxyribonucleoside monophosphate biosyn...	6	5	2.23	0.02925	1
GO:0010889	regulation of sequestering of triglyceri...	6	5	2.23	0.02925	1
GO:0019885	antigen processing and presentation of e...	6	5	2.23	0.02925	1
GO:0021534	cell proliferation in hindbrain	6	5	2.23	0.02925	1
GO:0021924	cell proliferation in external granule l...	6	5	2.23	0.02925	1
GO:0021930	cerebellar granule cell precursor prolif...	6	5	2.23	0.02925	1
GO:0032098	regulation of appetite	6	5	2.23	0.02925	1
GO:0035812	renal sodium excretion	6	5	2.23	0.02925	1
GO:0035813	regulation of renal sodium excretion	6	5	2.23	0.02925	1
GO:0035965	cardiolipin acyl-chain remodeling	6	5	2.23	0.02925	1
GO:0036003	positive regulation of transcription fro...	6	5	2.23	0.02925	1
GO:0045760	positive regulation of action potential	6	5	2.23	0.02925	1
GO:0048243	norepinephrine secretion	6	5	2.23	0.02925	1
GO:0048484	enteric nervous system development	6	5	2.23	0.02925	1
GO:0050942	positive regulation of pigment cell diff...	6	5	2.23	0.02925	1
GO:0051955	regulation of amino acid transport	6	5	2.23	0.02925	1
GO:0071361	cellular response to ethanol	6	5	2.23	0.02925	1
GO:0098581	detection of external biotic stimulus	6	5	2.23	0.02925	1
GO:1901339	regulation of store-operated calcium cha...	6	5	2.23	0.02925	1
GO:0006760	folic acid-containing compound metabolic...	22	13	8.17	0.02986	1
GO:0015837	amine transport	22	13	8.17	0.02986	1
GO:0045599	negative regulation of fat cell differen...	22	13	8.17	0.02986	1
GO:0051952	regulation of amine transport	22	13	8.17	0.02986	1
GO:0002065	columnar/cuboidal epithelial cell differ...	51	26	18.94	0.02990	1
GO:0042089	cytokine biosynthetic process	51	26	18.94	0.02990	1
GO:0045471	response to ethanol	65	32	24.14	0.03046	1
GO:0006213	pyrimidine nucleoside metabolic process	33	18	12.26	0.03101	1
GO:0050729	positive regulation of inflammatory resp...	33	18	12.26	0.03101	1
GO:0006949	syncytium formation	20	12	7.43	0.03164	1
GO:0019752	carboxylic acid metabolic process	624	254	231.77	0.03186	1
GO:0031497	chromatin assembly	70	34	26	0.03270	1
GO:0050848	regulation of calcium-mediated signaling	18	11	6.69	0.03335	1
GO:0042221	response to chemical	1988	774	738.39	0.03404	1
GO:0042493	response to drug	232	100	86.17	0.03424	1
GO:0002029	desensitization of G-protein coupled rec...	8	6	2.97	0.03425	1
GO:0019883	antigen processing and presentation of e...	8	6	2.97	0.03425	1
GO:0022401	negative adaptation of signaling pathway	8	6	2.97	0.03425	1
GO:0045117	azole transport	8	6	2.97	0.03425	1
GO:0048857	neural nucleus development	8	6	2.97	0.03425	1
GO:0055078	sodium ion homeostasis	8	6	2.97	0.03425	1
GO:0055114	oxidation-reduction process	394	164	146.34	0.03455	1
GO:0002931	response to ischemia	16	10	5.94	0.03488	1
GO:0015701	bicarbonate transport	16	10	5.94	0.03488	1
GO:0019076	viral release from host cell	16	10	5.94	0.03488	1
GO:0033280	response to vitamin D	16	10	5.94	0.03488	1
GO:0042559	pteridine-containing compound biosynthet...	16	10	5.94	0.03488	1
GO:1901607	alpha-amino acid biosynthetic process	54	27	20.06	0.03597	1
GO:0006103	2-oxoglutarate metabolic process	14	9	5.2	0.03608	1
GO:0042596	fear response	14	9	5.2	0.03608	1
GO:0042558	pteridine-containing compound metabolic ...	29	16	10.77	0.03629	1
GO:0043618	regulation of transcription from RNA pol...	29	16	10.77	0.03629	1
GO:0060563	neuroepithelial cell differentiation	29	16	10.77	0.03629	1
GO:0009396	folic acid-containing compound biosynthe...	10	7	3.71	0.03632	1
GO:0034035	purine ribonucleoside bisphosphate metab...	10	7	3.71	0.03632	1
GO:0042755	eating behavior	10	7	3.71	0.03632	1
GO:0048246	macrophage chemotaxis	10	7	3.71	0.03632	1
GO:0048268	clathrin coat assembly	10	7	3.71	0.03632	1
GO:0050427	3'-phosphoadenosine 5'-phosphosulfate me...	10	7	3.71	0.03632	1
GO:0050850	positive regulation of calcium-mediated ...	10	7	3.71	0.03632	1
GO:0050951	sensory perception of temperature stimul...	10	7	3.71	0.03632	1
GO:0008652	cellular amino acid biosynthetic process	80	38	29.71	0.03658	1
GO:0070997	neuron death	148	66	54.97	0.03659	1
GO:0009263	deoxyribonucleotide biosynthetic process	12	8	4.46	0.03670	1
GO:0032633	interleukin-4 production	12	8	4.46	0.03670	1
GO:0032735	positive regulation of interleukin-12 pr...	12	8	4.46	0.03670	1
GO:0048841	regulation of axon extension involved in...	12	8	4.46	0.03670	1
GO:0051926	negative regulation of calcium ion trans...	12	8	4.46	0.03670	1
GO:0060749	mammary gland alveolus development	12	8	4.46	0.03670	1
GO:0061377	mammary gland lobule development	12	8	4.46	0.03670	1
GO:0019915	lipid storage	38	20	14.11	0.03678	1
GO:0006109	regulation of carbohydrate metabolic pro...	85	40	31.57	0.03825	1
GO:0008277	regulation of G-protein coupled receptor...	85	40	31.57	0.03825	1
GO:0009064	glutamine family amino acid metabolic pr...	45	23	16.71	0.03848	1
GO:0051099	positive regulation of binding	59	29	21.91	0.03908	1
GO:0006022	aminoglycan metabolic process	119	54	44.2	0.03909	1
GO:0042107	cytokine metabolic process	52	26	19.31	0.03914	1
GO:0098542	defense response to other organism	146	65	54.23	0.03920	1
GO:0032649	regulation of interferon-gamma productio...	27	15	10.03	0.03923	1
GO:0010632	regulation of epithelial cell migration	90	42	33.43	0.03975	1
GO:0051046	regulation of secretion	266	113	98.8	0.03977	1
GO:0006520	cellular amino acid metabolic process	332	139	123.31	0.04034	1
GO:0007186	G-protein coupled receptor signaling pat...	294	124	109.2	0.04058	1
GO:0051240	positive regulation of multicellular org...	312	131	115.88	0.04163	1
GO:0048709	oligodendrocyte differentiation	43	22	15.97	0.04189	1
GO:1901605	alpha-amino acid metabolic process	144	64	53.48	0.04200	1
GO:0006414	translational elongation	25	14	9.29	0.04239	1
GO:0010883	regulation of lipid storage	25	14	9.29	0.04239	1
GO:0000187	activation of MAPK activity	88	41	32.69	0.04297	1
GO:0032103	positive regulation of response to exter...	93	43	34.54	0.04439	1
GO:0010634	positive regulation of epithelial cell m...	62	30	23.03	0.04549	1
GO:0019362	pyridine nucleotide metabolic process	41	21	15.23	0.04563	1
GO:0042398	cellular modified amino acid biosyntheti...	41	21	15.23	0.04563	1
GO:0046496	nicotinamide nucleotide metabolic proces...	41	21	15.23	0.04563	1
GO:0000083	regulation of transcription involved in ...	23	13	8.54	0.04576	1
GO:0006732	coenzyme metabolic process	162	71	60.17	0.04618	1
GO:0090130	tissue migration	125	56	46.43	0.04664	1
GO:0002456	T cell mediated immunity	32	17	11.89	0.04733	1
GO:0030193	regulation of blood coagulation	32	17	11.89	0.04733	1
GO:0044070	regulation of anion transport	32	17	11.89	0.04733	1
GO:1900046	regulation of hemostasis	32	17	11.89	0.04733	1
GO:0045444	fat cell differentiation	96	44	35.66	0.04924	1
GO:0048521	negative regulation of behavior	21	12	7.8	0.04933	1
GO:0060612	adipose tissue development	21	12	7.8	0.04933	1
GO:0043523	regulation of neuron apoptotic process	118	53	43.83	0.04940	1
GO:0001667	ameboidal cell migration	170	74	63.14	0.04959	1
GO:0070936	protein K48-linked ubiquitination	39	20	14.49	0.04974	1
GO:0002819	regulation of adaptive immune response	53	26	19.69	0.05033	1
GO:0072524	pyridine-containing compound metabolic p...	46	23	17.09	0.05055	1
GO:0042113	B cell activation	106	48	39.37	0.05141	1
GO:0071824	protein-DNA complex subunit organization	106	48	39.37	0.05141	1
GO:0032623	interleukin-2 production	30	16	11.14	0.05153	1
GO:0001755	neural crest cell migration	19	11	7.06	0.05310	1
GO:0051875	pigment granule localization	19	11	7.06	0.05310	1
GO:0000956	nuclear-transcribed mRNA catabolic proce...	94	43	34.91	0.05313	1
GO:0006487	protein N-linked glycosylation	94	43	34.91	0.05313	1
GO:0006959	humoral immune response	37	19	13.74	0.05425	1
GO:1901214	regulation of neuron death	126	56	46.8	0.05432	1
GO:0070887	cellular response to chemical stimulus	1320	517	490.28	0.05436	1
GO:0006733	oxidoreduction coenzyme metabolic proces...	51	25	18.94	0.05480	1
GO:0007600	sensory perception	221	94	82.08	0.05484	1
GO:0043933	macromolecular complex subunit organizat...	1071	422	397.79	0.05635	1
GO:0001818	negative regulation of cytokine producti...	75	35	27.86	0.05689	1
GO:0042220	response to cocaine	17	10	6.31	0.05700	1
GO:0043114	regulation of vascular permeability	17	10	6.31	0.05700	1
GO:0043278	response to morphine	17	10	6.31	0.05700	1
GO:0048846	axon extension involved in axon guidance	17	10	6.31	0.05700	1
GO:0060420	regulation of heart growth	17	10	6.31	0.05700	1
GO:0061098	positive regulation of protein tyrosine ...	17	10	6.31	0.05700	1
GO:1901685	glutathione derivative metabolic process	17	10	6.31	0.05700	1
GO:1901687	glutathione derivative biosynthetic proc...	17	10	6.31	0.05700	1
GO:1902284	neuron projection extension involved in ...	17	10	6.31	0.05700	1
GO:0010631	epithelial cell migration	124	55	46.06	0.05825	1
GO:0090132	epithelium migration	124	55	46.06	0.05825	1
GO:0051402	neuron apoptotic process	134	59	49.77	0.05911	1
GO:0034341	response to interferon-gamma	68	32	25.26	0.05936	1
GO:0097305	response to alcohol	159	69	59.06	0.06005	1
GO:0007586	digestion	42	21	15.6	0.06012	1
GO:0006536	glutamate metabolic process	15	9	5.57	0.06096	1
GO:0006953	acute-phase response	15	9	5.57	0.06096	1
GO:0010543	regulation of platelet activation	15	9	5.57	0.06096	1
GO:0010611	regulation of cardiac muscle hypertrophy	15	9	5.57	0.06096	1
GO:0014743	regulation of muscle hypertrophy	15	9	5.57	0.06096	1
GO:0015893	drug transport	15	9	5.57	0.06096	1
GO:0019433	triglyceride catabolic process	15	9	5.57	0.06096	1
GO:0038061	NIK/NF-kappaB signaling	15	9	5.57	0.06096	1
GO:0051904	pigment granule transport	15	9	5.57	0.06096	1
GO:0055021	regulation of cardiac muscle tissue grow...	15	9	5.57	0.06096	1
GO:0007229	integrin-mediated signaling pathway	54	26	20.06	0.06365	1
GO:0043620	regulation of DNA-templated transcriptio...	33	17	12.26	0.06468	1
GO:0048678	response to axon injury	33	17	12.26	0.06468	1
GO:0008053	mitochondrial fusion	13	8	4.83	0.06481	1
GO:0019321	pentose metabolic process	13	8	4.83	0.06481	1
GO:0032369	negative regulation of lipid transport	13	8	4.83	0.06481	1
GO:0036151	phosphatidylcholine acyl-chain remodelin...	13	8	4.83	0.06481	1
GO:0046459	short-chain fatty acid metabolic process	13	8	4.83	0.06481	1
GO:0048070	regulation of developmental pigmentation	13	8	4.83	0.06481	1
GO:1902186	regulation of viral release from host ce...	13	8	4.83	0.06481	1
GO:0043255	regulation of carbohydrate biosynthetic ...	47	23	17.46	0.06510	1
GO:0006221	pyrimidine nucleotide biosynthetic proce...	24	13	8.91	0.06666	1
GO:0014896	muscle hypertrophy	24	13	8.91	0.06666	1
GO:0032655	regulation of interleukin-12 production	24	13	8.91	0.06666	1
GO:0035315	hair cell differentiation	24	13	8.91	0.06666	1
GO:0018196	peptidyl-asparagine modification	88	40	32.69	0.06673	1
GO:0000290	deadenylation-dependent decapping of nuc...	5	4	1.86	0.06683	1
GO:0002577	regulation of antigen processing and pre...	5	4	1.86	0.06683	1
GO:0003091	renal water homeostasis	5	4	1.86	0.06683	1
GO:0006561	proline biosynthetic process	5	4	1.86	0.06683	1
GO:0006681	galactosylceramide metabolic process	5	4	1.86	0.06683	1
GO:0007217	tachykinin receptor signaling pathway	5	4	1.86	0.06683	1
GO:0010988	regulation of low-density lipoprotein pa...	5	4	1.86	0.06683	1
GO:0014048	regulation of glutamate secretion	5	4	1.86	0.06683	1
GO:0014061	regulation of norepinephrine secretion	5	4	1.86	0.06683	1
GO:0016045	detection of bacterium	5	4	1.86	0.06683	1
GO:0019372	lipoxygenase pathway	5	4	1.86	0.06683	1
GO:0019374	galactolipid metabolic process	5	4	1.86	0.06683	1
GO:0021936	regulation of cerebellar granule cell pr...	5	4	1.86	0.06683	1
GO:0021940	positive regulation of cerebellar granul...	5	4	1.86	0.06683	1
GO:0030011	maintenance of cell polarity	5	4	1.86	0.06683	1
GO:0031223	auditory behavior	5	4	1.86	0.06683	1
GO:0032237	activation of store-operated calcium cha...	5	4	1.86	0.06683	1
GO:0032776	DNA methylation on cytosine	5	4	1.86	0.06683	1
GO:0033539	fatty acid beta-oxidation using acyl-CoA...	5	4	1.86	0.06683	1
GO:0034036	purine ribonucleoside bisphosphate biosy...	5	4	1.86	0.06683	1
GO:0035809	regulation of urine volume	5	4	1.86	0.06683	1
GO:0035810	positive regulation of urine volume	5	4	1.86	0.06683	1
GO:0035815	positive regulation of renal sodium excr...	5	4	1.86	0.06683	1
GO:0036297	interstrand cross-link repair	5	4	1.86	0.06683	1
GO:0042976	activation of Janus kinase activity	5	4	1.86	0.06683	1
GO:0043032	positive regulation of macrophage activa...	5	4	1.86	0.06683	1
GO:0046826	negative regulation of protein export fr...	5	4	1.86	0.06683	1
GO:0046950	cellular ketone body metabolic process	5	4	1.86	0.06683	1
GO:0048842	positive regulation of axon extension in...	5	4	1.86	0.06683	1
GO:0050428	3'-phosphoadenosine 5'-phosphosulfate bi...	5	4	1.86	0.06683	1
GO:0051156	glucose 6-phosphate metabolic process	5	4	1.86	0.06683	1
GO:0055129	L-proline biosynthetic process	5	4	1.86	0.06683	1
GO:0060666	dichotomous subdivision of terminal unit...	5	4	1.86	0.06683	1
GO:0071027	nuclear RNA surveillance	5	4	1.86	0.06683	1
GO:0071028	nuclear mRNA surveillance	5	4	1.86	0.06683	1
GO:0071539	protein localization to centrosome	5	4	1.86	0.06683	1
GO:0071569	protein ufmylation	5	4	1.86	0.06683	1
GO:0071674	mononuclear cell migration	5	4	1.86	0.06683	1
GO:0071675	regulation of mononuclear cell migration	5	4	1.86	0.06683	1
GO:0085020	protein K6-linked ubiquitination	5	4	1.86	0.06683	1
GO:0097050	type B pancreatic cell apoptotic process	5	4	1.86	0.06683	1
GO:0098543	detection of other organism	5	4	1.86	0.06683	1
GO:1901341	positive regulation of store-operated ca...	5	4	1.86	0.06683	1
GO:2000425	regulation of apoptotic cell clearance	5	4	1.86	0.06683	1
GO:2001300	lipoxin metabolic process	5	4	1.86	0.06683	1
GO:0043648	dicarboxylic acid metabolic process	59	28	21.91	0.06702	1
GO:0006950	response to stress	2114	815	785.19	0.06808	1
GO:0007250	activation of NF-kappaB-inducing kinase ...	11	7	4.09	0.06826	1
GO:0010878	cholesterol storage	11	7	4.09	0.06826	1
GO:0030214	hyaluronan catabolic process	11	7	4.09	0.06826	1
GO:0035886	vascular smooth muscle cell differentiat...	11	7	4.09	0.06826	1
GO:0051953	negative regulation of amine transport	11	7	4.09	0.06826	1
GO:0070098	chemokine-mediated signaling pathway	11	7	4.09	0.06826	1
GO:0071391	cellular response to estrogen stimulus	11	7	4.09	0.06826	1
GO:0072010	glomerular epithelium development	11	7	4.09	0.06826	1
GO:0072311	glomerular epithelial cell differentiati...	11	7	4.09	0.06826	1
GO:0090005	negative regulation of establishment of ...	11	7	4.09	0.06826	1
GO:0090224	regulation of spindle organization	11	7	4.09	0.06826	1
GO:1901186	positive regulation of ERBB signaling pa...	11	7	4.09	0.06826	1
GO:0034097	response to cytokine	343	141	127.4	0.06868	1
GO:0002685	regulation of leukocyte migration	52	25	19.31	0.06931	1
GO:2001243	negative regulation of intrinsic apoptot...	52	25	19.31	0.06931	1
GO:0006893	Golgi to plasma membrane transport	31	16	11.51	0.07071	1
GO:0030810	positive regulation of nucleotide biosyn...	31	16	11.51	0.07071	1
GO:0032835	glomerulus development	31	16	11.51	0.07071	1
GO:1900373	positive regulation of purine nucleotide...	31	16	11.51	0.07071	1
GO:0000301	retrograde transport, vesicle recycling ...	9	6	3.34	0.07073	1
GO:0006837	serotonin transport	9	6	3.34	0.07073	1
GO:0009265	2'-deoxyribonucleotide biosynthetic proc...	9	6	3.34	0.07073	1
GO:0009649	entrainment of circadian clock	9	6	3.34	0.07073	1
GO:0032673	regulation of interleukin-4 production	9	6	3.34	0.07073	1
GO:0035024	negative regulation of Rho protein signa...	9	6	3.34	0.07073	1
GO:0045745	positive regulation of G-protein coupled...	9	6	3.34	0.07073	1
GO:0046385	deoxyribose phosphate biosynthetic proce...	9	6	3.34	0.07073	1
GO:0051930	regulation of sensory perception of pain	9	6	3.34	0.07073	1
GO:0051931	regulation of sensory perception	9	6	3.34	0.07073	1
GO:0071772	response to BMP	9	6	3.34	0.07073	1
GO:0071773	cellular response to BMP stimulus	9	6	3.34	0.07073	1
GO:0090330	regulation of platelet aggregation	9	6	3.34	0.07073	1
GO:0006461	protein complex assembly	748	297	277.82	0.07107	1
GO:0070271	protein complex biogenesis	748	297	277.82	0.07107	1
GO:0002724	regulation of T cell cytokine production	7	5	2.6	0.07111	1
GO:0002820	negative regulation of adaptive immune r...	7	5	2.6	0.07111	1
GO:0006563	L-serine metabolic process	7	5	2.6	0.07111	1
GO:0010996	response to auditory stimulus	7	5	2.6	0.07111	1
GO:0015874	norepinephrine transport	7	5	2.6	0.07111	1
GO:0019227	neuronal action potential propagation	7	5	2.6	0.07111	1
GO:0019934	cGMP-mediated signaling	7	5	2.6	0.07111	1
GO:0043097	pyrimidine nucleoside salvage	7	5	2.6	0.07111	1
GO:0044062	regulation of excretion	7	5	2.6	0.07111	1
GO:0048570	notochord morphogenesis	7	5	2.6	0.07111	1
GO:0048671	negative regulation of collateral sprout...	7	5	2.6	0.07111	1
GO:0050961	detection of temperature stimulus involv...	7	5	2.6	0.07111	1
GO:0050965	detection of temperature stimulus involv...	7	5	2.6	0.07111	1
GO:0051482	positive regulation of cytosolic calcium...	7	5	2.6	0.07111	1
GO:0051497	negative regulation of stress fiber asse...	7	5	2.6	0.07111	1
GO:0051770	positive regulation of nitric-oxide synt...	7	5	2.6	0.07111	1
GO:0072310	glomerular epithelial cell development	7	5	2.6	0.07111	1
GO:0072673	lamellipodium morphogenesis	7	5	2.6	0.07111	1
GO:2000378	negative regulation of reactive oxygen s...	7	5	2.6	0.07111	1
GO:0044262	cellular carbohydrate metabolic process	178	76	66.11	0.07172	1
GO:0032147	activation of protein kinase activity	173	74	64.26	0.07200	1
GO:0006081	cellular aldehyde metabolic process	22	12	8.17	0.07270	1
GO:0043405	regulation of MAP kinase activity	186	79	69.08	0.07540	1
GO:0010675	regulation of cellular carbohydrate meta...	79	36	29.34	0.07620	1
GO:0009617	response to bacterium	166	71	61.66	0.07682	1
GO:0043687	post-translational protein modification	156	67	57.94	0.07731	1
GO:0002821	positive regulation of adaptive immune r...	29	15	10.77	0.07737	1
GO:0014032	neural crest cell development	29	15	10.77	0.07737	1
GO:0032024	positive regulation of insulin secretion	29	15	10.77	0.07737	1
GO:0000184	nuclear-transcribed mRNA catabolic proce...	36	18	13.37	0.07843	1
GO:0007215	glutamate receptor signaling pathway	36	18	13.37	0.07843	1
GO:0007631	feeding behavior	36	18	13.37	0.07843	1
GO:0043271	negative regulation of ion transport	36	18	13.37	0.07843	1
GO:0072073	kidney epithelium development	36	18	13.37	0.07843	1
GO:1901698	response to nitrogen compound	492	198	182.74	0.07926	1
GO:0002711	positive regulation of T cell mediated i...	20	11	7.43	0.07932	1
GO:0007159	leukocyte cell-cell adhesion	20	11	7.43	0.07932	1
GO:0031102	neuron projection regeneration	20	11	7.43	0.07932	1
GO:0030203	glycosaminoglycan metabolic process	114	50	42.34	0.08239	1
GO:0007623	circadian rhythm	60	28	22.29	0.08240	1
GO:0048284	organelle fusion	60	28	22.29	0.08240	1
GO:0072330	monocarboxylic acid biosynthetic process	119	52	44.2	0.08268	1
GO:0050795	regulation of behavior	82	37	30.46	0.08383	1
GO:0046717	acid secretion	41	20	15.23	0.08469	1
GO:0006730	one-carbon metabolic process	27	14	10.03	0.08476	1
GO:0009225	nucleotide-sugar metabolic process	27	14	10.03	0.08476	1
GO:0019369	arachidonic acid metabolic process	27	14	10.03	0.08476	1
GO:0060416	response to growth hormone	27	14	10.03	0.08476	1
GO:0070534	protein K63-linked ubiquitination	27	14	10.03	0.08476	1
GO:0018279	protein N-linked glycosylation via aspar...	87	39	32.31	0.08505	1
GO:0019221	cytokine-mediated signaling pathway	205	86	76.14	0.08650	1
GO:0000768	syncytium formation by plasma membrane f...	18	10	6.69	0.08657	1
GO:0014072	response to isoquinoline alkaloid	18	10	6.69	0.08657	1
GO:0032400	melanosome localization	18	10	6.69	0.08657	1
GO:0050922	negative regulation of chemotaxis	18	10	6.69	0.08657	1
GO:0010243	response to organonitrogen compound	457	184	169.74	0.08667	1
GO:0007420	brain development	382	155	141.88	0.08696	1
GO:0042594	response to starvation	102	45	37.89	0.08747	1
GO:0051607	defense response to virus	112	49	41.6	0.08827	1
GO:0014070	response to organic cyclic compound	390	158	144.85	0.08860	1
GO:0043406	positive regulation of MAP kinase activi...	127	55	47.17	0.08860	1
GO:0048659	smooth muscle cell proliferation	46	22	17.09	0.08978	1
GO:1901215	negative regulation of neuron death	85	38	31.57	0.09165	1
GO:0007338	single fertilization	39	19	14.49	0.09260	1
GO:0021675	nerve development	39	19	14.49	0.09260	1
GO:0031623	receptor internalization	39	19	14.49	0.09260	1
GO:0002708	positive regulation of lymphocyte mediat...	25	13	9.29	0.09296	1
GO:0032615	interleukin-12 production	25	13	9.29	0.09296	1
GO:0032663	regulation of interleukin-2 production	25	13	9.29	0.09296	1
GO:0046503	glycerolipid catabolic process	25	13	9.29	0.09296	1
GO:0010033	response to organic substance	1470	569	545.99	0.09381	1
GO:0006626	protein targeting to mitochondrion	51	24	18.94	0.09391	1
GO:0061041	regulation of wound healing	51	24	18.94	0.09391	1
GO:0014033	neural crest cell differentiation	32	16	11.89	0.09408	1
GO:1902106	negative regulation of leukocyte differe...	32	16	11.89	0.09408	1
GO:2000177	regulation of neural precursor cell prol...	32	16	11.89	0.09408	1
GO:0051258	protein polymerization	130	56	48.28	0.09448	1
GO:0010742	macrophage derived foam cell differentia...	16	9	5.94	0.09449	1
GO:0032729	positive regulation of interferon-gamma ...	16	9	5.94	0.09449	1
GO:0045909	positive regulation of vasodilation	16	9	5.94	0.09449	1
GO:0046461	neutral lipid catabolic process	16	9	5.94	0.09449	1
GO:0046464	acylglycerol catabolic process	16	9	5.94	0.09449	1
GO:0051905	establishment of pigment granule localiz...	16	9	5.94	0.09449	1
GO:0051932	synaptic transmission, GABAergic	16	9	5.94	0.09449	1
GO:0090077	foam cell differentiation	16	9	5.94	0.09449	1
GO:0001959	regulation of cytokine-mediated signalin...	56	26	20.8	0.09727	1
GO:0030856	regulation of epithelial cell differenti...	56	26	20.8	0.09727	1
GO:0034728	nucleosome organization	78	35	28.97	0.09761	1
GO:0002252	immune effector process	301	123	111.8	0.09786	1
GO:0007218	neuropeptide signaling pathway	44	21	16.34	0.09799	1
GO:0042035	regulation of cytokine biosynthetic proc...	44	21	16.34	0.09799	1
GO:0048660	regulation of smooth muscle cell prolife...	44	21	16.34	0.09799	1
GO:0032787	monocarboxylic acid metabolic process	291	119	108.08	0.10024	1
GO:0009611	response to wounding	660	261	245.14	0.10029	1
GO:0032102	negative regulation of response to exter...	98	43	36.4	0.10078	1
GO:0050818	regulation of coagulation	37	18	13.74	0.10134	1
GO:0002709	regulation of T cell mediated immunity	23	12	8.54	0.10210	1
GO:0003300	cardiac muscle hypertrophy	23	12	8.54	0.10210	1
GO:0007140	male meiosis	23	12	8.54	0.10210	1
GO:0014897	striated muscle hypertrophy	23	12	8.54	0.10210	1
GO:0031644	regulation of neurological system proces...	23	12	8.54	0.10210	1
GO:0045921	positive regulation of exocytosis	23	12	8.54	0.10210	1
GO:0060419	heart growth	23	12	8.54	0.10210	1
GO:0051048	negative regulation of secretion	66	30	24.51	0.10220	1
GO:0006740	NADPH regeneration	14	8	5.2	0.10311	1
GO:0007143	female meiosis	14	8	5.2	0.10311	1
GO:0010524	positive regulation of calcium ion trans...	14	8	5.2	0.10311	1
GO:0010743	regulation of macrophage derived foam ce...	14	8	5.2	0.10311	1
GO:0032042	mitochondrial DNA metabolic process	14	8	5.2	0.10311	1
GO:0032402	melanosome transport	14	8	5.2	0.10311	1
GO:0045923	positive regulation of fatty acid metabo...	14	8	5.2	0.10311	1
GO:0070741	response to interleukin-6	14	8	5.2	0.10311	1
GO:1902667	regulation of axon guidance	14	8	5.2	0.10311	1
GO:0060429	epithelium development	483	193	179.4	0.10317	1
GO:0033059	cellular pigmentation	30	15	11.14	0.10322	1
GO:0009100	glycoprotein metabolic process	284	116	105.48	0.10640	1
GO:0015850	organic hydroxy compound transport	81	36	30.09	0.10640	1
GO:0040013	negative regulation of locomotion	126	54	46.8	0.10750	1
GO:0045785	positive regulation of cell adhesion	96	42	35.66	0.10815	1
GO:0044801	single-organism membrane fusion	64	29	23.77	0.11067	1
GO:0032675	regulation of interleukin-6 production	35	17	13	0.11102	1
GO:0042310	vasoconstriction	35	17	13	0.11102	1
GO:0045981	positive regulation of nucleotide metabo...	35	17	13	0.11102	1
GO:1900544	positive regulation of purine nucleotide...	35	17	13	0.11102	1
GO:0006790	sulfur compound metabolic process	182	76	67.6	0.11108	1
GO:0034622	cellular macromolecular complex assembly	466	186	173.08	0.11154	1
GO:0019674	NAD metabolic process	21	11	7.8	0.11230	1
GO:0032312	regulation of ARF GTPase activity	21	11	7.8	0.11230	1
GO:0051937	catecholamine transport	21	11	7.8	0.11230	1
GO:0055017	cardiac muscle tissue growth	21	11	7.8	0.11230	1
GO:0006767	water-soluble vitamin metabolic process	69	31	25.63	0.11237	1
GO:0050920	regulation of chemotaxis	69	31	25.63	0.11237	1
GO:0001662	behavioral fear response	12	7	4.46	0.11244	1
GO:0002209	behavioral defense response	12	7	4.46	0.11244	1
GO:0006266	DNA ligation	12	7	4.46	0.11244	1
GO:0018149	peptide cross-linking	12	7	4.46	0.11244	1
GO:0032048	cardiolipin metabolic process	12	7	4.46	0.11244	1
GO:0036152	phosphatidylethanolamine acyl-chain remo...	12	7	4.46	0.11244	1
GO:0045123	cellular extravasation	12	7	4.46	0.11244	1
GO:0048670	regulation of collateral sprouting	12	7	4.46	0.11244	1
GO:0060384	innervation	12	7	4.46	0.11244	1
GO:1900117	regulation of execution phase of apoptos...	12	7	4.46	0.11244	1
GO:1901222	regulation of NIK/NF-kappaB signaling	12	7	4.46	0.11244	1
GO:0051716	cellular response to stimulus	3717	1409	1380.58	0.11388	1
GO:0006112	energy reserve metabolic process	124	53	46.06	0.11463	1
GO:0010811	positive regulation of cell-substrate ad...	52	24	19.31	0.11500	1
GO:0043901	negative regulation of multi-organism pr...	52	24	19.31	0.11500	1
GO:0043112	receptor metabolic process	84	37	31.2	0.11534	1
GO:0050896	response to stimulus	4537	1714	1685.14	0.11636	1
GO:0055067	monovalent inorganic cation homeostasis	40	19	14.86	0.11700	1
GO:0007270	neuron-neuron synaptic transmission	57	26	21.17	0.11774	1
GO:0071346	cellular response to interferon-gamma	57	26	21.17	0.11774	1
GO:1901293	nucleoside phosphate biosynthetic proces...	198	82	73.54	0.11890	1
GO:0035051	cardiocyte differentiation	62	28	23.03	0.11986	1
GO:0060759	regulation of response to cytokine stimu...	62	28	23.03	0.11986	1
GO:0009719	response to endogenous stimulus	821	321	304.94	0.12024	1
GO:0010906	regulation of glucose metabolic process	67	30	24.89	0.12147	1
GO:0001822	kidney development	127	54	47.17	0.12148	1
GO:0046887	positive regulation of hormone secretion	45	21	16.71	0.12159	1
GO:0002793	positive regulation of peptide secretion	33	16	12.26	0.12176	1
GO:0006809	nitric oxide biosynthetic process	33	16	12.26	0.12176	1
GO:0034644	cellular response to UV	33	16	12.26	0.12176	1
GO:0097006	regulation of plasma lipoprotein particl...	33	16	12.26	0.12176	1
GO:0044710	single-organism metabolic process	3430	1301	1273.98	0.12201	1
GO:0000422	mitochondrion degradation	10	6	3.71	0.12235	1
GO:0001976	neurological system process involved in ...	10	6	3.71	0.12235	1
GO:0002052	positive regulation of neuroblast prolif...	10	6	3.71	0.12235	1
GO:0006182	cGMP biosynthetic process	10	6	3.71	0.12235	1
GO:0007158	neuron cell-cell adhesion	10	6	3.71	0.12235	1
GO:0007340	acrosome reaction	10	6	3.71	0.12235	1
GO:0009070	serine family amino acid biosynthetic pr...	10	6	3.71	0.12235	1
GO:0010829	negative regulation of glucose transport	10	6	3.71	0.12235	1
GO:0010885	regulation of cholesterol storage	10	6	3.71	0.12235	1
GO:0030823	regulation of cGMP metabolic process	10	6	3.71	0.12235	1
GO:0032607	interferon-alpha production	10	6	3.71	0.12235	1
GO:0032647	regulation of interferon-alpha productio...	10	6	3.71	0.12235	1
GO:0032732	positive regulation of interleukin-1 pro...	10	6	3.71	0.12235	1
GO:0032743	positive regulation of interleukin-2 pro...	10	6	3.71	0.12235	1
GO:0042730	fibrinolysis	10	6	3.71	0.12235	1
GO:0045742	positive regulation of epidermal growth ...	10	6	3.71	0.12235	1
GO:0060644	mammary gland epithelial cell differenti...	10	6	3.71	0.12235	1
GO:0061318	renal filtration cell differentiation	10	6	3.71	0.12235	1
GO:0072112	glomerular visceral epithelial cell diff...	10	6	3.71	0.12235	1
GO:0098900	regulation of action potential	10	6	3.71	0.12235	1
GO:2000060	positive regulation of protein ubiquitin...	10	6	3.71	0.12235	1
GO:0051606	detection of stimulus	117	50	43.46	0.12283	1
GO:0090002	establishment of protein localization to...	77	34	28.6	0.12351	1
GO:0000002	mitochondrial genome maintenance	19	10	7.06	0.12375	1
GO:0021545	cranial nerve development	19	10	7.06	0.12375	1
GO:0042491	auditory receptor cell differentiation	19	10	7.06	0.12375	1
GO:0050432	catecholamine secretion	19	10	7.06	0.12375	1
GO:0043524	negative regulation of neuron apoptotic ...	82	36	30.46	0.12407	1
GO:0000722	telomere maintenance via recombination	26	13	9.66	0.12477	1
GO:0002705	positive regulation of leukocyte mediate...	26	13	9.66	0.12477	1
GO:0002824	positive regulation of adaptive immune r...	26	13	9.66	0.12477	1
GO:0043604	amide biosynthetic process	26	13	9.66	0.12477	1
GO:0044763	single-organism cellular process	7103	2663	2638.22	0.12496	1
GO:0009112	nucleobase metabolic process	50	23	18.57	0.12512	1
GO:0055007	cardiac muscle cell differentiation	50	23	18.57	0.12512	1
GO:0009165	nucleotide biosynthetic process	196	81	72.8	0.12541	1
GO:0001666	response to hypoxia	168	70	62.4	0.12673	1
GO:0021954	central nervous system neuron developmen...	38	18	14.11	0.12800	1
GO:0050663	cytokine secretion	38	18	14.11	0.12800	1
GO:0044699	single-organism process	7808	2922	2900.07	0.12848	1
GO:0042787	protein ubiquitination involved in ubiqu...	65	29	24.14	0.13133	1
GO:0000042	protein targeting to Golgi	8	5	2.97	0.13253	1
GO:0006107	oxaloacetate metabolic process	8	5	2.97	0.13253	1
GO:0007638	mechanosensory behavior	8	5	2.97	0.13253	1
GO:0008655	pyrimidine-containing compound salvage	8	5	2.97	0.13253	1
GO:0010560	positive regulation of glycoprotein bios...	8	5	2.97	0.13253	1
GO:0010745	negative regulation of macrophage derive...	8	5	2.97	0.13253	1
GO:0010939	regulation of necrotic cell death	8	5	2.97	0.13253	1
GO:0010984	regulation of lipoprotein particle clear...	8	5	2.97	0.13253	1
GO:0014911	positive regulation of smooth muscle cel...	8	5	2.97	0.13253	1
GO:0016048	detection of temperature stimulus	8	5	2.97	0.13253	1
GO:0019852	L-ascorbic acid metabolic process	8	5	2.97	0.13253	1
GO:0021681	cerebellar granular layer development	8	5	2.97	0.13253	1
GO:0030826	regulation of cGMP biosynthetic process	8	5	2.97	0.13253	1
GO:0032892	positive regulation of organic acid tran...	8	5	2.97	0.13253	1
GO:0035520	monoubiquitinated protein deubiquitinati...	8	5	2.97	0.13253	1
GO:0045719	negative regulation of glycogen biosynth...	8	5	2.97	0.13253	1
GO:0045986	negative regulation of smooth muscle con...	8	5	2.97	0.13253	1
GO:0046085	adenosine metabolic process	8	5	2.97	0.13253	1
GO:0046321	positive regulation of fatty acid oxidat...	8	5	2.97	0.13253	1
GO:0046325	negative regulation of glucose import	8	5	2.97	0.13253	1
GO:0046596	regulation of viral entry into host cell	8	5	2.97	0.13253	1
GO:0048087	positive regulation of developmental pig...	8	5	2.97	0.13253	1
GO:0050995	negative regulation of lipid catabolic p...	8	5	2.97	0.13253	1
GO:0051409	response to nitrosative stress	8	5	2.97	0.13253	1
GO:0060768	regulation of epithelial cell proliferat...	8	5	2.97	0.13253	1
GO:0070874	negative regulation of glycogen metaboli...	8	5	2.97	0.13253	1
GO:0071634	regulation of transforming growth factor...	8	5	2.97	0.13253	1
GO:1900153	positive regulation of nuclear-transcrib...	8	5	2.97	0.13253	1
GO:0036293	response to decreased oxygen levels	171	71	63.51	0.13259	1
GO:0060333	interferon-gamma-mediated signaling path...	43	20	15.97	0.13269	1
GO:0050796	regulation of insulin secretion	100	43	37.14	0.13288	1
GO:0048762	mesenchymal cell differentiation	90	39	33.43	0.13353	1
GO:0014031	mesenchymal cell development	85	37	31.57	0.13359	1
GO:0050679	positive regulation of epithelial cell p...	85	37	31.57	0.13359	1
GO:0006271	DNA strand elongation involved in DNA re...	31	15	11.51	0.13370	1
GO:0006635	fatty acid beta-oxidation	48	22	17.83	0.13619	1
GO:0000279	M phase	17	9	6.31	0.13666	1
GO:0002762	negative regulation of myeloid leukocyte...	17	9	6.31	0.13666	1
GO:0006297	nucleotide-excision repair, DNA gap fill...	17	9	6.31	0.13666	1
GO:0009147	pyrimidine nucleoside triphosphate metab...	17	9	6.31	0.13666	1
GO:0010677	negative regulation of cellular carbohyd...	17	9	6.31	0.13666	1
GO:0045620	negative regulation of lymphocyte differ...	17	9	6.31	0.13666	1
GO:0046068	cGMP metabolic process	17	9	6.31	0.13666	1
GO:0046676	negative regulation of insulin secretion	17	9	6.31	0.13666	1
GO:0072529	pyrimidine-containing compound catabolic...	17	9	6.31	0.13666	1
GO:0090278	negative regulation of peptide hormone s...	17	9	6.31	0.13666	1
GO:0070482	response to oxygen levels	179	74	66.48	0.13693	1
GO:0014075	response to amine	24	12	8.91	0.13753	1
GO:1901700	response to oxygen-containing compound	724	283	268.91	0.13872	1
GO:0016311	dephosphorylation	246	100	91.37	0.13879	1
GO:0090407	organophosphate biosynthetic process	394	157	146.34	0.13989	1
GO:1901137	carbohydrate derivative biosynthetic pro...	488	193	181.25	0.13996	1
GO:0032635	interleukin-6 production	36	17	13.37	0.14017	1
GO:0032200	telomere organization	58	26	21.54	0.14068	1
GO:0006402	mRNA catabolic process	103	44	38.26	0.14143	1
GO:0007187	G-protein coupled receptor signaling pat...	63	28	23.4	0.14199	1
GO:0034440	lipid oxidation	63	28	23.4	0.14199	1
GO:0000090	mitotic anaphase	6	4	2.23	0.14201	1
GO:0002534	cytokine production involved in inflamma...	6	4	2.23	0.14201	1
GO:0006013	mannose metabolic process	6	4	2.23	0.14201	1
GO:0006183	GTP biosynthetic process	6	4	2.23	0.14201	1
GO:0006290	pyrimidine dimer repair	6	4	2.23	0.14201	1
GO:0006388	tRNA splicing, via endonucleolytic cleav...	6	4	2.23	0.14201	1
GO:0007549	dosage compensation	6	4	2.23	0.14201	1
GO:0009120	deoxyribonucleoside metabolic process	6	4	2.23	0.14201	1
GO:0009221	pyrimidine deoxyribonucleotide biosynthe...	6	4	2.23	0.14201	1
GO:0010042	response to manganese ion	6	4	2.23	0.14201	1
GO:0014848	urinary tract smooth muscle contraction	6	4	2.23	0.14201	1
GO:0016082	synaptic vesicle priming	6	4	2.23	0.14201	1
GO:0021548	pons development	6	4	2.23	0.14201	1
GO:0021554	optic nerve development	6	4	2.23	0.14201	1
GO:0021684	cerebellar granular layer formation	6	4	2.23	0.14201	1
GO:0021707	cerebellar granule cell differentiation	6	4	2.23	0.14201	1
GO:0032753	positive regulation of interleukin-4 pro...	6	4	2.23	0.14201	1
GO:0032957	inositol trisphosphate metabolic process	6	4	2.23	0.14201	1
GO:0033206	meiotic cytokinesis	6	4	2.23	0.14201	1
GO:0033683	nucleotide-excision repair, DNA incision	6	4	2.23	0.14201	1
GO:0034389	lipid particle organization	6	4	2.23	0.14201	1
GO:0036150	phosphatidylserine acyl-chain remodeling	6	4	2.23	0.14201	1
GO:0042759	long-chain fatty acid biosynthetic proce...	6	4	2.23	0.14201	1
GO:0045351	type I interferon biosynthetic process	6	4	2.23	0.14201	1
GO:0045722	positive regulation of gluconeogenesis	6	4	2.23	0.14201	1
GO:0045955	negative regulation of calcium ion-depen...	6	4	2.23	0.14201	1
GO:0046007	negative regulation of activated T cell ...	6	4	2.23	0.14201	1
GO:0046541	saliva secretion	6	4	2.23	0.14201	1
GO:0048305	immunoglobulin secretion	6	4	2.23	0.14201	1
GO:0048739	cardiac muscle fiber development	6	4	2.23	0.14201	1
GO:0051608	histamine transport	6	4	2.23	0.14201	1
GO:0051917	regulation of fibrinolysis	6	4	2.23	0.14201	1
GO:0060544	regulation of necroptotic process	6	4	2.23	0.14201	1
GO:0060575	intestinal epithelial cell differentiati...	6	4	2.23	0.14201	1
GO:0060770	negative regulation of epithelial cell p...	6	4	2.23	0.14201	1
GO:0071025	RNA surveillance	6	4	2.23	0.14201	1
GO:0071498	cellular response to fluid shear stress	6	4	2.23	0.14201	1
GO:0071549	cellular response to dexamethasone stimu...	6	4	2.23	0.14201	1
GO:0071600	otic vesicle morphogenesis	6	4	2.23	0.14201	1
GO:0071636	positive regulation of transforming grow...	6	4	2.23	0.14201	1
GO:0071711	basement membrane organization	6	4	2.23	0.14201	1
GO:0072015	glomerular visceral epithelial cell deve...	6	4	2.23	0.14201	1
GO:0072160	nephron tubule epithelial cell different...	6	4	2.23	0.14201	1
GO:0072189	ureter development	6	4	2.23	0.14201	1
GO:0072321	chaperone-mediated protein transport	6	4	2.23	0.14201	1
GO:0097084	vascular smooth muscle cell development	6	4	2.23	0.14201	1
GO:1900125	regulation of hyaluronan biosynthetic pr...	6	4	2.23	0.14201	1
GO:2001214	positive regulation of vasculogenesis	6	4	2.23	0.14201	1
GO:0030041	actin filament polymerization	93	40	34.54	0.14274	1
GO:0043279	response to alkaloid	68	30	25.26	0.14285	1
GO:0044281	small molecule metabolic process	2038	778	756.96	0.14476	1
GO:0032368	regulation of lipid transport	41	19	15.23	0.14489	1
GO:0030804	positive regulation of cyclic nucleotide...	29	14	10.77	0.14702	1
GO:0032104	regulation of response to extracellular ...	29	14	10.77	0.14702	1
GO:0032107	regulation of response to nutrient level...	29	14	10.77	0.14702	1
GO:0048661	positive regulation of smooth muscle cel...	29	14	10.77	0.14702	1
GO:0050707	regulation of cytokine secretion	29	14	10.77	0.14702	1
GO:1901615	organic hydroxy compound metabolic proce...	283	114	105.11	0.14759	1
GO:0043623	cellular protein complex assembly	278	112	103.26	0.14964	1
GO:0030900	forebrain development	216	88	80.23	0.15025	1
GO:0006304	DNA modification	51	23	18.94	0.15076	1
GO:0021782	glial cell development	51	23	18.94	0.15076	1
GO:0072006	nephron development	51	23	18.94	0.15076	1
GO:0002702	positive regulation of production of mol...	15	8	5.57	0.15129	1
GO:0009148	pyrimidine nucleoside triphosphate biosy...	15	8	5.57	0.15129	1
GO:0010922	positive regulation of phosphatase activ...	15	8	5.57	0.15129	1
GO:0032228	regulation of synaptic transmission, GAB...	15	8	5.57	0.15129	1
GO:0032401	establishment of melanosome localization	15	8	5.57	0.15129	1
GO:0032722	positive regulation of chemokine product...	15	8	5.57	0.15129	1
GO:0032760	positive regulation of tumor necrosis fa...	15	8	5.57	0.15129	1
GO:0048668	collateral sprouting	15	8	5.57	0.15129	1
GO:0050433	regulation of catecholamine secretion	15	8	5.57	0.15129	1
GO:0090114	COPII-coated vesicle budding	15	8	5.57	0.15129	1
GO:1902692	regulation of neuroblast proliferation	15	8	5.57	0.15129	1
GO:0022408	negative regulation of cell-cell adhesio...	22	11	8.17	0.15191	1
GO:0030212	hyaluronan metabolic process	22	11	8.17	0.15191	1
GO:0055024	regulation of cardiac muscle tissue deve...	22	11	8.17	0.15191	1
GO:0090503	RNA phosphodiester bond hydrolysis, exon...	22	11	8.17	0.15191	1
GO:0006323	DNA packaging	96	41	35.66	0.15201	1
GO:0030335	positive regulation of cell migration	175	72	65	0.15242	1
GO:0002688	regulation of leukocyte chemotaxis	34	16	12.63	0.15367	1
GO:0022616	DNA strand elongation	34	16	12.63	0.15367	1
GO:0072329	monocarboxylic acid catabolic process	66	29	24.51	0.15416	1
GO:0046883	regulation of hormone secretion	124	52	46.06	0.15432	1
GO:0043900	regulation of multi-organism process	170	70	63.14	0.15433	1
GO:0043270	positive regulation of ion transport	71	31	26.37	0.15441	1
GO:0050900	leukocyte migration	147	61	54.6	0.15509	1
GO:0006091	generation of precursor metabolites and ...	315	126	117	0.15677	1
GO:2000147	positive regulation of cell motility	178	73	66.11	0.15865	1
GO:0002250	adaptive immune response	104	44	38.63	0.16004	1
GO:0001819	positive regulation of cytokine producti...	155	64	57.57	0.16016	1
GO:0003008	system process	764	297	283.77	0.16028	1
GO:0050730	regulation of peptidyl-tyrosine phosphor...	99	42	36.77	0.16133	1
GO:0003382	epithelial cell morphogenesis	27	13	10.03	0.16193	1
GO:0046456	icosanoid biosynthetic process	27	13	10.03	0.16193	1
GO:1901570	fatty acid derivative biosynthetic proce...	27	13	10.03	0.16193	1
GO:1901983	regulation of protein acetylation	27	13	10.03	0.16193	1
GO:2000756	regulation of peptidyl-lysine acetylatio...	27	13	10.03	0.16193	1
GO:0030832	regulation of actin filament length	94	40	34.91	0.16252	1
GO:0040017	positive regulation of locomotion	186	76	69.08	0.16274	1
GO:0030148	sphingolipid biosynthetic process	49	22	18.2	0.16381	1
GO:0006023	aminoglycan biosynthetic process	79	34	29.34	0.16536	1
GO:0030073	insulin secretion	117	49	43.46	0.16568	1
GO:0009266	response to temperature stimulus	74	32	27.49	0.16595	1
GO:0009913	epidermal cell differentiation	74	32	27.49	0.16595	1
GO:0010954	positive regulation of protein processin...	74	32	27.49	0.16595	1
GO:0009566	fertilization	59	26	21.91	0.16603	1
GO:0051186	cofactor metabolic process	207	84	76.88	0.16793	1
GO:0006098	pentose-phosphate shunt	13	7	4.83	0.16800	1
GO:0006862	nucleotide transport	13	7	4.83	0.16800	1
GO:0009084	glutamine family amino acid biosynthetic...	13	7	4.83	0.16800	1
GO:0010324	membrane invagination	13	7	4.83	0.16800	1
GO:0021533	cell differentiation in hindbrain	13	7	4.83	0.16800	1
GO:0031338	regulation of vesicle fusion	13	7	4.83	0.16800	1
GO:0033198	response to ATP	13	7	4.83	0.16800	1
GO:0034110	regulation of homotypic cell-cell adhesi...	13	7	4.83	0.16800	1
GO:0034383	low-density lipoprotein particle clearan...	13	7	4.83	0.16800	1
GO:0044253	positive regulation of multicellular org...	13	7	4.83	0.16800	1
GO:0045880	positive regulation of smoothened signal...	13	7	4.83	0.16800	1
GO:0060043	regulation of cardiac muscle cell prolif...	13	7	4.83	0.16800	1
GO:0071354	cellular response to interleukin-6	13	7	4.83	0.16800	1
GO:2000191	regulation of fatty acid transport	13	7	4.83	0.16800	1
GO:0014855	striated muscle cell proliferation	20	10	7.43	0.16819	1
GO:0046939	nucleotide phosphorylation	20	10	7.43	0.16819	1
GO:0060338	regulation of type I interferon-mediated...	20	10	7.43	0.16819	1
GO:0071398	cellular response to fatty acid	20	10	7.43	0.16819	1
GO:0030801	positive regulation of cyclic nucleotide...	32	15	11.89	0.16866	1
GO:0035872	nucleotide-binding domain, leucine rich ...	32	15	11.89	0.16866	1
GO:0046620	regulation of organ growth	32	15	11.89	0.16866	1
GO:0090277	positive regulation of peptide hormone s...	32	15	11.89	0.16866	1
GO:0009725	response to hormone	473	186	175.68	0.16900	1
GO:0009914	hormone transport	153	63	56.83	0.16922	1
GO:0060249	anatomical structure homeostasis	166	68	61.66	0.17168	1
GO:0009991	response to extracellular stimulus	228	92	84.68	0.17209	1
GO:0007204	positive regulation of cytosolic calcium...	97	41	36.03	0.17222	1
GO:0050877	neurological system process	455	179	169	0.17238	1
GO:0002687	positive regulation of leukocyte migrati...	37	17	13.74	0.17318	1
GO:0042742	defense response to bacterium	37	17	13.74	0.17318	1
GO:0048525	negative regulation of viral process	37	17	13.74	0.17318	1
GO:0048546	digestive tract morphogenesis	37	17	13.74	0.17318	1
GO:0031667	response to nutrient levels	210	85	78	0.17377	1
GO:0002449	lymphocyte mediated immunity	87	37	32.31	0.17509	1
GO:0032231	regulation of actin filament bundle asse...	42	19	15.6	0.17617	1
GO:0045598	regulation of fat cell differentiation	47	21	17.46	0.17805	1
GO:0048144	fibroblast proliferation	47	21	17.46	0.17805	1
GO:2000146	negative regulation of cell motility	110	46	40.86	0.17807	1
GO:0009791	post-embryonic development	72	31	26.74	0.17840	1
GO:0048565	digestive tract development	72	31	26.74	0.17840	1
GO:0071453	cellular response to oxygen levels	72	31	26.74	0.17840	1
GO:0046888	negative regulation of hormone secretion	25	12	9.29	0.17867	1
GO:0090183	regulation of kidney development	25	12	9.29	0.17867	1
GO:0002831	regulation of response to biotic stimulu...	67	29	24.89	0.17911	1
GO:0051101	regulation of DNA binding	52	23	19.31	0.17911	1
GO:0015718	monocarboxylic acid transport	62	27	23.03	0.17952	1
GO:0019395	fatty acid oxidation	62	27	23.03	0.17952	1
GO:0000723	telomere maintenance	57	25	21.17	0.17955	1
GO:0002699	positive regulation of immune effector p...	57	25	21.17	0.17955	1
GO:0050727	regulation of inflammatory response	105	44	39	0.18001	1
GO:0009066	aspartate family amino acid metabolic pr...	30	14	11.14	0.18535	1
GO:0048477	oogenesis	30	14	11.14	0.18535	1
GO:0044272	sulfur compound biosynthetic process	90	38	33.43	0.18559	1
GO:0002228	natural killer cell mediated immunity	18	9	6.69	0.18675	1
GO:0002792	negative regulation of peptide secretion	18	9	6.69	0.18675	1
GO:0009220	pyrimidine ribonucleotide biosynthetic p...	18	9	6.69	0.18675	1
GO:0010823	negative regulation of mitochondrion org...	18	9	6.69	0.18675	1
GO:0042267	natural killer cell mediated cytotoxicit...	18	9	6.69	0.18675	1
GO:0045010	actin nucleation	18	9	6.69	0.18675	1
GO:0070670	response to interleukin-4	18	9	6.69	0.18675	1
GO:0072661	protein targeting to plasma membrane	18	9	6.69	0.18675	1
GO:1900077	negative regulation of cellular response...	18	9	6.69	0.18675	1
GO:0006241	CTP biosynthetic process	11	6	4.09	0.18727	1
GO:0006516	glycoprotein catabolic process	11	6	4.09	0.18727	1
GO:0006684	sphingomyelin metabolic process	11	6	4.09	0.18727	1
GO:0006895	Golgi to endosome transport	11	6	4.09	0.18727	1
GO:0006911	phagocytosis, engulfment	11	6	4.09	0.18727	1
GO:0006978	DNA damage response, signal transduction...	11	6	4.09	0.18727	1
GO:0007141	male meiosis I	11	6	4.09	0.18727	1
GO:0007620	copulation	11	6	4.09	0.18727	1
GO:0010002	cardioblast differentiation	11	6	4.09	0.18727	1
GO:0010884	positive regulation of lipid storage	11	6	4.09	0.18727	1
GO:0010888	negative regulation of lipid storage	11	6	4.09	0.18727	1
GO:0019184	nonribosomal peptide biosynthetic proces...	11	6	4.09	0.18727	1
GO:0021884	forebrain neuron development	11	6	4.09	0.18727	1
GO:0032105	negative regulation of response to extra...	11	6	4.09	0.18727	1
GO:0032108	negative regulation of response to nutri...	11	6	4.09	0.18727	1
GO:0034616	response to laminar fluid shear stress	11	6	4.09	0.18727	1
GO:0043174	nucleoside salvage	11	6	4.09	0.18727	1
GO:0046036	CTP metabolic process	11	6	4.09	0.18727	1
GO:0051767	nitric-oxide synthase biosynthetic proce...	11	6	4.09	0.18727	1
GO:0051769	regulation of nitric-oxide synthase bios...	11	6	4.09	0.18727	1
GO:0097009	energy homeostasis	11	6	4.09	0.18727	1
GO:1902187	negative regulation of viral release fro...	11	6	4.09	0.18727	1
GO:0002697	regulation of immune effector process	131	54	48.66	0.18850	1
GO:0006901	vesicle coating	35	16	13	0.18958	1
GO:0007077	mitotic nuclear envelope disassembly	35	16	13	0.18958	1
GO:0021762	substantia nigra development	35	16	13	0.18958	1
GO:0090003	regulation of establishment of protein l...	35	16	13	0.18958	1
GO:0006955	immune response	686	266	254.8	0.18996	1
GO:0008033	tRNA processing	70	30	26	0.19175	1
GO:0003014	renal system process	40	18	14.86	0.19217	1
GO:0016525	negative regulation of angiogenesis	40	18	14.86	0.19217	1
GO:0060337	type I interferon signaling pathway	40	18	14.86	0.19217	1
GO:0071357	cellular response to type I interferon	40	18	14.86	0.19217	1
GO:0002822	regulation of adaptive immune response b...	45	20	16.71	0.19361	1
GO:0006879	cellular iron ion homeostasis	45	20	16.71	0.19361	1
GO:0001894	tissue homeostasis	98	41	36.4	0.19385	1
GO:0000288	nuclear-transcribed mRNA catabolic proce...	55	24	20.43	0.19419	1
GO:0070588	calcium ion transmembrane transport	55	24	20.43	0.19419	1
GO:0071705	nitrogen compound transport	410	161	152.28	0.19512	1
GO:0008064	regulation of actin polymerization or de...	93	39	34.54	0.19606	1
GO:0051272	positive regulation of cellular componen...	183	74	67.97	0.19608	1
GO:0046879	hormone secretion	152	62	56.46	0.19622	1
GO:0006739	NADP metabolic process	23	11	8.54	0.19756	1
GO:0008334	histone mRNA metabolic process	23	11	8.54	0.19756	1
GO:0008631	intrinsic apoptotic signaling pathway in...	23	11	8.54	0.19756	1
GO:0009069	serine family amino acid metabolic proce...	23	11	8.54	0.19756	1
GO:0032201	telomere maintenance via semi-conservati...	23	11	8.54	0.19756	1
GO:0033209	tumor necrosis factor-mediated signaling...	23	11	8.54	0.19756	1
GO:0035065	regulation of histone acetylation	23	11	8.54	0.19756	1
GO:0045912	negative regulation of carbohydrate meta...	23	11	8.54	0.19756	1
GO:0050906	detection of stimulus involved in sensor...	23	11	8.54	0.19756	1
GO:0050994	regulation of lipid catabolic process	23	11	8.54	0.19756	1
GO:0060396	growth hormone receptor signaling pathwa...	23	11	8.54	0.19756	1
GO:0071378	cellular response to growth hormone stim...	23	11	8.54	0.19756	1
GO:0072376	protein activation cascade	23	11	8.54	0.19756	1
GO:0071902	positive regulation of protein serine/th...	165	67	61.28	0.19785	1
GO:0090087	regulation of peptide transport	111	46	41.23	0.19869	1
GO:0072511	divalent inorganic cation transport	178	72	66.11	0.19901	1
GO:0009267	cellular response to starvation	83	35	30.83	0.20033	1
GO:0006631	fatty acid metabolic process	217	87	80.6	0.20040	1
GO:0030336	negative regulation of cell migration	106	44	39.37	0.20128	1
GO:0006024	glycosaminoglycan biosynthetic process	78	33	28.97	0.20236	1
GO:0006749	glutathione metabolic process	28	13	10.4	0.20399	1
GO:0022600	digestive system process	28	13	10.4	0.20399	1
GO:0046580	negative regulation of Ras protein signa...	28	13	10.4	0.20399	1
GO:0032535	regulation of cellular component size	168	68	62.4	0.20505	1
GO:0036294	cellular response to decreased oxygen le...	68	29	25.26	0.20606	1
GO:0046683	response to organophosphorus	63	27	23.4	0.20766	1
GO:0001909	leukocyte mediated cytotoxicity	33	15	12.26	0.20774	1
GO:0005978	glycogen biosynthetic process	33	15	12.26	0.20774	1
GO:0009250	glucan biosynthetic process	33	15	12.26	0.20774	1
GO:0051928	positive regulation of calcium ion trans...	33	15	12.26	0.20774	1
GO:0051271	negative regulation of cellular componen...	114	47	42.34	0.20801	1
GO:0003197	endocardial cushion development	16	8	5.94	0.20809	1
GO:0009994	oocyte differentiation	16	8	5.94	0.20809	1
GO:0015949	nucleobase-containing small molecule int...	16	8	5.94	0.20809	1
GO:0032897	negative regulation of viral transcripti...	16	8	5.94	0.20809	1
GO:0035036	sperm-egg recognition	16	8	5.94	0.20809	1
GO:0045214	sarcomere organization	16	8	5.94	0.20809	1
GO:0048599	oocyte development	16	8	5.94	0.20809	1
GO:0070265	necrotic cell death	16	8	5.94	0.20809	1
GO:1901099	negative regulation of signal transducti...	16	8	5.94	0.20809	1
GO:2001240	negative regulation of extrinsic apoptot...	16	8	5.94	0.20809	1
GO:0070838	divalent metal ion transport	176	71	65.37	0.20904	1
GO:0071310	cellular response to organic substance	1102	422	409.31	0.20954	1
GO:0065003	macromolecular complex assembly	879	338	326.48	0.20970	1
GO:0001556	oocyte maturation	9	5	3.34	0.20977	1
GO:0002092	positive regulation of receptor internal...	9	5	3.34	0.20977	1
GO:0002369	T cell cytokine production	9	5	3.34	0.20977	1
GO:0003215	cardiac right ventricle morphogenesis	9	5	3.34	0.20977	1
GO:0006491	N-glycan processing	9	5	3.34	0.20977	1
GO:0006553	lysine metabolic process	9	5	3.34	0.20977	1
GO:0006554	lysine catabolic process	9	5	3.34	0.20977	1
GO:0007007	inner mitochondrial membrane organizatio...	9	5	3.34	0.20977	1
GO:0009162	deoxyribonucleoside monophosphate metabo...	9	5	3.34	0.20977	1
GO:0009437	carnitine metabolic process	9	5	3.34	0.20977	1
GO:0009650	UV protection	9	5	3.34	0.20977	1
GO:0010224	response to UV-B	9	5	3.34	0.20977	1
GO:0030213	hyaluronan biosynthetic process	9	5	3.34	0.20977	1
GO:0031579	membrane raft organization	9	5	3.34	0.20977	1
GO:0032727	positive regulation of interferon-alpha ...	9	5	3.34	0.20977	1
GO:0032731	positive regulation of interleukin-1 bet...	9	5	3.34	0.20977	1
GO:0032891	negative regulation of organic acid tran...	9	5	3.34	0.20977	1
GO:0032958	inositol phosphate biosynthetic process	9	5	3.34	0.20977	1
GO:0033631	cell-cell adhesion mediated by integrin	9	5	3.34	0.20977	1
GO:0035418	protein localization to synapse	9	5	3.34	0.20977	1
GO:0035587	purinergic receptor signaling pathway	9	5	3.34	0.20977	1
GO:0035774	positive regulation of insulin secretion...	9	5	3.34	0.20977	1
GO:0035970	peptidyl-threonine dephosphorylation	9	5	3.34	0.20977	1
GO:0039529	RIG-I signaling pathway	9	5	3.34	0.20977	1
GO:0043116	negative regulation of vascular permeabi...	9	5	3.34	0.20977	1
GO:0044058	regulation of digestive system process	9	5	3.34	0.20977	1
GO:0045907	positive regulation of vasoconstriction	9	5	3.34	0.20977	1
GO:0046348	amino sugar catabolic process	9	5	3.34	0.20977	1
GO:0051044	positive regulation of membrane protein ...	9	5	3.34	0.20977	1
GO:0051154	negative regulation of striated muscle c...	9	5	3.34	0.20977	1
GO:0060045	positive regulation of cardiac muscle ce...	9	5	3.34	0.20977	1
GO:0060231	mesenchymal to epithelial transition	9	5	3.34	0.20977	1
GO:0060712	spongiotrophoblast layer development	9	5	3.34	0.20977	1
GO:0060767	epithelial cell proliferation involved i...	9	5	3.34	0.20977	1
GO:0060976	coronary vasculature development	9	5	3.34	0.20977	1
GO:0070498	interleukin-1-mediated signaling pathway	9	5	3.34	0.20977	1
GO:0071044	histone mRNA catabolic process	9	5	3.34	0.20977	1
GO:0071295	cellular response to vitamin	9	5	3.34	0.20977	1
GO:0071599	otic vesicle development	9	5	3.34	0.20977	1
GO:0071604	transforming growth factor beta producti...	9	5	3.34	0.20977	1
GO:0072600	establishment of protein localization to...	9	5	3.34	0.20977	1
GO:0090208	positive regulation of triglyceride meta...	9	5	3.34	0.20977	1
GO:0090279	regulation of calcium ion import	9	5	3.34	0.20977	1
GO:0090303	positive regulation of wound healing	9	5	3.34	0.20977	1
GO:2000114	regulation of establishment of cell pola...	9	5	3.34	0.20977	1
GO:0030808	regulation of nucleotide biosynthetic pr...	53	23	19.69	0.21003	1
GO:0071482	cellular response to light stimulus	53	23	19.69	0.21003	1
GO:1900371	regulation of purine nucleotide biosynth...	53	23	19.69	0.21003	1
GO:0003073	regulation of systemic arterial blood pr...	43	19	15.97	0.21060	1
GO:0006690	icosanoid metabolic process	43	19	15.97	0.21060	1
GO:0010595	positive regulation of endothelial cell ...	43	19	15.97	0.21060	1
GO:1901568	fatty acid derivative metabolic process	43	19	15.97	0.21060	1
GO:0033273	response to vitamin	48	21	17.83	0.21061	1
GO:0002791	regulation of peptide secretion	109	45	40.49	0.21092	1
GO:0048871	multicellular organismal homeostasis	127	52	47.17	0.21100	1
GO:0043062	extracellular structure organization	249	99	92.48	0.21151	1
GO:0032870	cellular response to hormone stimulus	283	112	105.11	0.21206	1
GO:0060541	respiratory system development	122	50	45.31	0.21412	1
GO:0005976	polysaccharide metabolic process	81	34	30.09	0.21418	1
GO:0015711	organic anion transport	192	77	71.31	0.21629	1
GO:0046651	lymphocyte proliferation	99	41	36.77	0.21684	1
GO:0071900	regulation of protein serine/threonine k...	286	113	106.23	0.21736	1
GO:0016054	organic acid catabolic process	148	60	54.97	0.21794	1
GO:0046395	carboxylic acid catabolic process	148	60	54.97	0.21794	1
GO:1901652	response to peptide	273	108	101.4	0.21851	1
GO:0000188	inactivation of MAPK activity	21	10	7.8	0.21899	1
GO:0016241	regulation of macroautophagy	21	10	7.8	0.21899	1
GO:0021955	central nervous system neuron axonogenes...	21	10	7.8	0.21899	1
GO:0030514	negative regulation of BMP signaling pat...	21	10	7.8	0.21899	1
GO:0043470	regulation of carbohydrate catabolic pro...	21	10	7.8	0.21899	1
GO:0043471	regulation of cellular carbohydrate cata...	21	10	7.8	0.21899	1
GO:0046471	phosphatidylglycerol metabolic process	21	10	7.8	0.21899	1
GO:0050982	detection of mechanical stimulus	21	10	7.8	0.21899	1
GO:0070509	calcium ion import	21	10	7.8	0.21899	1
GO:0090311	regulation of protein deacetylation	21	10	7.8	0.21899	1
GO:0002443	leukocyte mediated immunity	112	46	41.6	0.22052	1
GO:0002376	immune system process	1210	462	449.42	0.22098	1
GO:0006641	triglyceride metabolic process	66	28	24.51	0.22139	1
GO:0045862	positive regulation of proteolysis	66	28	24.51	0.22139	1
GO:0071456	cellular response to hypoxia	66	28	24.51	0.22139	1
GO:0040012	regulation of locomotion	365	143	135.57	0.22152	1
GO:0016042	lipid catabolic process	156	63	57.94	0.22238	1
GO:0006816	calcium ion transport	169	68	62.77	0.22295	1
GO:0043473	pigmentation	61	26	22.66	0.22355	1
GO:0043001	Golgi to plasma membrane protein transpo...	26	12	9.66	0.22487	1
GO:0048146	positive regulation of fibroblast prolif...	26	12	9.66	0.22487	1
GO:1901264	carbohydrate derivative transport	26	12	9.66	0.22487	1
GO:0021953	central nervous system neuron differenti...	84	35	31.2	0.22588	1
GO:0009743	response to carbohydrate	102	42	37.89	0.22713	1
GO:0008037	cell recognition	51	22	18.94	0.22717	1
GO:0000387	spliceosomal snRNP assembly	31	14	11.51	0.22788	1
GO:0060113	inner ear receptor cell differentiation	31	14	11.51	0.22788	1
GO:0080134	regulation of response to stress	558	216	207.25	0.22794	1
GO:0001938	positive regulation of endothelial cell ...	46	20	17.09	0.22845	1
GO:0043149	stress fiber assembly	46	20	17.09	0.22845	1
GO:0030397	membrane disassembly	36	16	13.37	0.22911	1
GO:0051081	nuclear envelope disassembly	36	16	13.37	0.22911	1
GO:0055092	sterol homeostasis	36	16	13.37	0.22911	1
GO:0034340	response to type I interferon	41	18	15.23	0.22917	1
GO:0044728	DNA methylation or demethylation	41	18	15.23	0.22917	1
GO:0009101	glycoprotein biosynthetic process	245	97	91	0.22990	1
GO:0007166	cell surface receptor signaling pathway	1606	610	596.5	0.23107	1
GO:0002448	mast cell mediated immunity	14	7	5.2	0.23289	1
GO:0006658	phosphatidylserine metabolic process	14	7	5.2	0.23289	1
GO:0007339	binding of sperm to zona pellucida	14	7	5.2	0.23289	1
GO:0008209	androgen metabolic process	14	7	5.2	0.23289	1
GO:0009268	response to pH	14	7	5.2	0.23289	1
GO:0021697	cerebellar cortex formation	14	7	5.2	0.23289	1
GO:0030903	notochord development	14	7	5.2	0.23289	1
GO:0032611	interleukin-1 beta production	14	7	5.2	0.23289	1
GO:0034314	Arp2/3 complex-mediated actin nucleation	14	7	5.2	0.23289	1
GO:0043043	peptide biosynthetic process	14	7	5.2	0.23289	1
GO:0045687	positive regulation of glial cell differ...	14	7	5.2	0.23289	1
GO:0048207	vesicle targeting, rough ER to cis-Golgi	14	7	5.2	0.23289	1
GO:0048208	COPII vesicle coating	14	7	5.2	0.23289	1
GO:0048713	regulation of oligodendrocyte differenti...	14	7	5.2	0.23289	1
GO:0051383	kinetochore organization	14	7	5.2	0.23289	1
GO:0060026	convergent extension	14	7	5.2	0.23289	1
GO:0071385	cellular response to glucocorticoid stim...	14	7	5.2	0.23289	1
GO:2000243	positive regulation of reproductive proc...	14	7	5.2	0.23289	1
GO:0051924	regulation of calcium ion transport	92	38	34.17	0.23396	1
GO:0043434	response to peptide hormone	261	103	96.94	0.23444	1
GO:0046903	secretion	519	201	192.77	0.23466	1
GO:0006639	acylglycerol metabolic process	69	29	25.63	0.23489	1
GO:0032496	response to lipopolysaccharide	123	50	45.68	0.23573	1
GO:0030198	extracellular matrix organization	248	98	92.11	0.23585	1
GO:0000394	RNA splicing, via endonucleolytic cleava...	7	4	2.6	0.23654	1
GO:0002328	pro-B cell differentiation	7	4	2.6	0.23654	1
GO:0003157	endocardium development	7	4	2.6	0.23654	1
GO:0003181	atrioventricular valve morphogenesis	7	4	2.6	0.23654	1
GO:0006228	UTP biosynthetic process	7	4	2.6	0.23654	1
GO:0006346	methylation-dependent chromatin silencin...	7	4	2.6	0.23654	1
GO:0006582	melanin metabolic process	7	4	2.6	0.23654	1
GO:0006777	Mo-molybdopterin cofactor biosynthetic p...	7	4	2.6	0.23654	1
GO:0007171	activation of transmembrane receptor pro...	7	4	2.6	0.23654	1
GO:0009648	photoperiodism	7	4	2.6	0.23654	1
GO:0010867	positive regulation of triglyceride bios...	7	4	2.6	0.23654	1
GO:0014002	astrocyte development	7	4	2.6	0.23654	1
GO:0014821	phasic smooth muscle contraction	7	4	2.6	0.23654	1
GO:0015695	organic cation transport	7	4	2.6	0.23654	1
GO:0018342	protein prenylation	7	4	2.6	0.23654	1
GO:0019720	Mo-molybdopterin cofactor metabolic proc...	7	4	2.6	0.23654	1
GO:0021683	cerebellar granular layer morphogenesis	7	4	2.6	0.23654	1
GO:0021794	thalamus development	7	4	2.6	0.23654	1
GO:0030502	negative regulation of bone mineralizati...	7	4	2.6	0.23654	1
GO:0032055	negative regulation of translation in re...	7	4	2.6	0.23654	1
GO:0032303	regulation of icosanoid secretion	7	4	2.6	0.23654	1
GO:0032324	molybdopterin cofactor biosynthetic proc...	7	4	2.6	0.23654	1
GO:0032799	low-density lipoprotein receptor particl...	7	4	2.6	0.23654	1
GO:0033604	negative regulation of catecholamine sec...	7	4	2.6	0.23654	1
GO:0035999	tetrahydrofolate interconversion	7	4	2.6	0.23654	1
GO:0036148	phosphatidylglycerol acyl-chain remodeli...	7	4	2.6	0.23654	1
GO:0042069	regulation of catecholamine metabolic pr...	7	4	2.6	0.23654	1
GO:0043089	positive regulation of Cdc42 GTPase acti...	7	4	2.6	0.23654	1
GO:0043267	negative regulation of potassium ion tra...	7	4	2.6	0.23654	1
GO:0043545	molybdopterin cofactor metabolic process	7	4	2.6	0.23654	1
GO:0044550	secondary metabolite biosynthetic proces...	7	4	2.6	0.23654	1
GO:0045741	positive regulation of epidermal growth ...	7	4	2.6	0.23654	1
GO:0046519	sphingoid metabolic process	7	4	2.6	0.23654	1
GO:0046639	negative regulation of alpha-beta T cell...	7	4	2.6	0.23654	1
GO:0048875	chemical homeostasis within a tissue	7	4	2.6	0.23654	1
GO:0050702	interleukin-1 beta secretion	7	4	2.6	0.23654	1
GO:0051189	prosthetic group metabolic process	7	4	2.6	0.23654	1
GO:0051322	anaphase	7	4	2.6	0.23654	1
GO:0051923	sulfation	7	4	2.6	0.23654	1
GO:0051972	regulation of telomerase activity	7	4	2.6	0.23654	1
GO:0060117	auditory receptor cell development	7	4	2.6	0.23654	1
GO:0060236	regulation of mitotic spindle organizati...	7	4	2.6	0.23654	1
GO:0060379	cardiac muscle cell myoblast differentia...	7	4	2.6	0.23654	1
GO:0070633	transepithelial transport	7	4	2.6	0.23654	1
GO:0070884	regulation of calcineurin-NFAT signaling...	7	4	2.6	0.23654	1
GO:0071305	cellular response to vitamin D	7	4	2.6	0.23654	1
GO:0071467	cellular response to pH	7	4	2.6	0.23654	1
GO:0071548	response to dexamethasone	7	4	2.6	0.23654	1
GO:0071679	commissural neuron axon guidance	7	4	2.6	0.23654	1
GO:0090083	regulation of inclusion body assembly	7	4	2.6	0.23654	1
GO:0097354	prenylation	7	4	2.6	0.23654	1
GO:1901030	positive regulation of mitochondrial out...	7	4	2.6	0.23654	1
GO:1901213	regulation of transcription from RNA pol...	7	4	2.6	0.23654	1
GO:2000193	positive regulation of fatty acid transp...	7	4	2.6	0.23654	1
GO:2000725	regulation of cardiac muscle cell differ...	7	4	2.6	0.23654	1
GO:0009888	tissue development	872	334	323.88	0.23950	1
GO:0009062	fatty acid catabolic process	59	25	21.91	0.24061	1
GO:0019722	calcium-mediated signaling	59	25	21.91	0.24061	1
GO:0022607	cellular component assembly	1322	503	491.02	0.24074	1
GO:0050954	sensory perception of mechanical stimulu...	82	34	30.46	0.24098	1
GO:0031669	cellular response to nutrient levels	100	41	37.14	0.24111	1
GO:0042886	amide transport	144	58	53.48	0.24159	1
GO:0030183	B cell differentiation	54	23	20.06	0.24327	1
GO:0043506	regulation of JUN kinase activity	54	23	20.06	0.24327	1
GO:0097529	myeloid leukocyte migration	54	23	20.06	0.24327	1
GO:0000281	mitotic cytokinesis	19	9	7.06	0.24345	1
GO:0000718	nucleotide-excision repair, DNA damage r...	19	9	7.06	0.24345	1
GO:0009409	response to cold	19	9	7.06	0.24345	1
GO:0009988	cell-cell recognition	19	9	7.06	0.24345	1
GO:0018146	keratan sulfate biosynthetic process	19	9	7.06	0.24345	1
GO:0019748	secondary metabolic process	19	9	7.06	0.24345	1
GO:0042133	neurotransmitter metabolic process	19	9	7.06	0.24345	1
GO:0044349	DNA excision	19	9	7.06	0.24345	1
GO:0046173	polyol biosynthetic process	19	9	7.06	0.24345	1
GO:0050715	positive regulation of cytokine secretio...	19	9	7.06	0.24345	1
GO:0060038	cardiac muscle cell proliferation	19	9	7.06	0.24345	1
GO:0070527	platelet aggregation	19	9	7.06	0.24345	1
GO:0072676	lymphocyte migration	19	9	7.06	0.24345	1
GO:0097035	regulation of membrane lipid distributio...	19	9	7.06	0.24345	1
GO:0007160	cell-matrix adhesion	113	46	41.97	0.24346	1
GO:0043123	positive regulation of I-kappaB kinase/N...	113	46	41.97	0.24346	1
GO:0055123	digestive system development	77	32	28.6	0.24455	1
GO:0010001	glial cell differentiation	95	39	35.29	0.24495	1
GO:0048870	cell motility	655	252	243.28	0.24517	1
GO:0051674	localization of cell	655	252	243.28	0.24517	1
GO:0006939	smooth muscle contraction	49	21	18.2	0.24572	1
GO:0035265	organ growth	49	21	18.2	0.24572	1
GO:0070665	positive regulation of leukocyte prolife...	49	21	18.2	0.24572	1
GO:0051017	actin filament bundle assembly	72	30	26.74	0.24814	1
GO:0061572	actin filament bundle organization	72	30	26.74	0.24814	1
GO:0006090	pyruvate metabolic process	24	11	8.91	0.24836	1
GO:0010464	regulation of mesenchymal cell prolifera...	24	11	8.91	0.24836	1
GO:0042339	keratan sulfate metabolic process	24	11	8.91	0.24836	1
GO:0002460	adaptive immune response based on somati...	90	37	33.43	0.24887	1
GO:0009582	detection of abiotic stimulus	90	37	33.43	0.24887	1
GO:0060326	cell chemotaxis	90	37	33.43	0.24887	1
GO:0048511	rhythmic process	121	49	44.94	0.24898	1
GO:0032844	regulation of homeostatic process	173	69	64.26	0.24913	1
GO:0051492	regulation of stress fiber assembly	39	17	14.49	0.24949	1
GO:1990267	response to transition metal nanoparticl...	39	17	14.49	0.24949	1
GO:0051058	negative regulation of small GTPase medi...	29	13	10.77	0.25027	1
GO:0006220	pyrimidine nucleotide metabolic process	34	15	12.63	0.25043	1
GO:0006305	DNA alkylation	34	15	12.63	0.25043	1
GO:0006306	DNA methylation	34	15	12.63	0.25043	1
GO:0032846	positive regulation of homeostatic proce...	34	15	12.63	0.25043	1
GO:0045913	positive regulation of carbohydrate meta...	34	15	12.63	0.25043	1
GO:0060485	mesenchyme development	103	42	38.26	0.25159	1
GO:0006260	DNA replication	249	98	92.48	0.25164	1
GO:0006289	nucleotide-excision repair	67	28	24.89	0.25175	1
GO:0001655	urogenital system development	181	72	67.23	0.25242	1
GO:0006766	vitamin metabolic process	85	35	31.57	0.25288	1
GO:0006399	tRNA metabolic process	116	47	43.09	0.25319	1
GO:1901342	regulation of vasculature development	116	47	43.09	0.25319	1
GO:1901617	organic hydroxy compound biosynthetic pr...	116	47	43.09	0.25319	1
GO:0015833	peptide transport	142	57	52.74	0.25416	1
GO:0032271	regulation of protein polymerization	98	40	36.4	0.25581	1
GO:0072659	protein localization to plasma membrane	98	40	36.4	0.25581	1
GO:0044236	multicellular organismal metabolic proce...	80	33	29.71	0.25697	1
GO:0042439	ethanolamine-containing compound metabol...	57	24	21.17	0.25892	1
GO:0050953	sensory perception of light stimulus	93	38	34.54	0.26015	1
GO:0044242	cellular lipid catabolic process	106	43	39.37	0.26196	1
GO:0045765	regulation of angiogenesis	106	43	39.37	0.26196	1
GO:0090276	regulation of peptide hormone secretion	106	43	39.37	0.26196	1
GO:0002320	lymphoid progenitor cell differentiation	12	6	4.46	0.26210	1
GO:0002437	inflammatory response to antigenic stimu...	12	6	4.46	0.26210	1
GO:0002720	positive regulation of cytokine producti...	12	6	4.46	0.26210	1
GO:0003081	regulation of systemic arterial blood pr...	12	6	4.46	0.26210	1
GO:0003416	endochondral bone growth	12	6	4.46	0.26210	1
GO:0006577	amino-acid betaine metabolic process	12	6	4.46	0.26210	1
GO:0006607	NLS-bearing protein import into nucleus	12	6	4.46	0.26210	1
GO:0009209	pyrimidine ribonucleoside triphosphate b...	12	6	4.46	0.26210	1
GO:0009235	cobalamin metabolic process	12	6	4.46	0.26210	1
GO:0010869	regulation of receptor biosynthetic proc...	12	6	4.46	0.26210	1
GO:0021544	subpallium development	12	6	4.46	0.26210	1
GO:0032309	icosanoid secretion	12	6	4.46	0.26210	1
GO:0033057	multicellular organismal reproductive be...	12	6	4.46	0.26210	1
GO:0034204	lipid translocation	12	6	4.46	0.26210	1
GO:0035235	ionotropic glutamate receptor signaling ...	12	6	4.46	0.26210	1
GO:0035767	endothelial cell chemotaxis	12	6	4.46	0.26210	1
GO:0039528	cytoplasmic pattern recognition receptor...	12	6	4.46	0.26210	1
GO:0042554	superoxide anion generation	12	6	4.46	0.26210	1
GO:0042772	DNA damage response, signal transduction...	12	6	4.46	0.26210	1
GO:0043030	regulation of macrophage activation	12	6	4.46	0.26210	1
GO:0044380	protein localization to cytoskeleton	12	6	4.46	0.26210	1
GO:0045332	phospholipid translocation	12	6	4.46	0.26210	1
GO:0045577	regulation of B cell differentiation	12	6	4.46	0.26210	1
GO:0046341	CDP-diacylglycerol metabolic process	12	6	4.46	0.26210	1
GO:0051382	kinetochore assembly	12	6	4.46	0.26210	1
GO:0060260	regulation of transcription initiation f...	12	6	4.46	0.26210	1
GO:0071715	icosanoid transport	12	6	4.46	0.26210	1
GO:0097300	programmed necrotic cell death	12	6	4.46	0.26210	1
GO:1901571	fatty acid derivative transport	12	6	4.46	0.26210	1
GO:0007188	adenylate cyclase-modulating G-protein c...	52	22	19.31	0.26241	1
GO:0051188	cofactor biosynthetic process	119	48	44.2	0.26283	1
GO:0060627	regulation of vesicle-mediated transport	179	71	66.48	0.26412	1
GO:0010810	regulation of cell-substrate adhesion	88	36	32.69	0.26460	1
GO:0006638	neutral lipid metabolic process	70	29	26	0.26539	1
GO:0032963	collagen metabolic process	70	29	26	0.26539	1
GO:0007292	female gamete generation	47	20	17.46	0.26578	1
GO:0007613	memory	47	20	17.46	0.26578	1
GO:0009408	response to heat	47	20	17.46	0.26578	1
GO:0050864	regulation of B cell activation	47	20	17.46	0.26578	1
GO:0030308	negative regulation of cell growth	101	41	37.51	0.26655	1
GO:0032943	mononuclear cell proliferation	101	41	37.51	0.26655	1
GO:0002237	response to molecule of bacterial origin	127	51	47.17	0.26762	1
GO:0002706	regulation of lymphocyte mediated immuni...	42	18	15.6	0.26892	1
GO:0030216	keratinocyte differentiation	42	18	15.6	0.26892	1
GO:0045446	endothelial cell differentiation	42	18	15.6	0.26892	1
GO:0031347	regulation of defense response	279	109	103.63	0.26904	1
GO:0000730	DNA recombinase assembly	5	3	1.86	0.26929	1
GO:0001696	gastric acid secretion	5	3	1.86	0.26929	1
GO:0001765	membrane raft assembly	5	3	1.86	0.26929	1
GO:0001821	histamine secretion	5	3	1.86	0.26929	1
GO:0002544	chronic inflammatory response	5	3	1.86	0.26929	1
GO:0002551	mast cell chemotaxis	5	3	1.86	0.26929	1
GO:0002674	negative regulation of acute inflammator...	5	3	1.86	0.26929	1
GO:0002689	negative regulation of leukocyte chemota...	5	3	1.86	0.26929	1
GO:0002823	negative regulation of adaptive immune r...	5	3	1.86	0.26929	1
GO:0003161	cardiac conduction system development	5	3	1.86	0.26929	1
GO:0003174	mitral valve development	5	3	1.86	0.26929	1
GO:0003198	epithelial to mesenchymal transition inv...	5	3	1.86	0.26929	1
GO:0003352	regulation of cilium movement	5	3	1.86	0.26929	1
GO:0003402	planar cell polarity pathway involved in...	5	3	1.86	0.26929	1
GO:0006089	lactate metabolic process	5	3	1.86	0.26929	1
GO:0006102	isocitrate metabolic process	5	3	1.86	0.26929	1
GO:0006477	protein sulfation	5	3	1.86	0.26929	1
GO:0006771	riboflavin metabolic process	5	3	1.86	0.26929	1
GO:0007320	insemination	5	3	1.86	0.26929	1
GO:0009189	deoxyribonucleoside diphosphate biosynth...	5	3	1.86	0.26929	1
GO:0009202	deoxyribonucleoside triphosphate biosynt...	5	3	1.86	0.26929	1
GO:0010459	negative regulation of heart rate	5	3	1.86	0.26929	1
GO:0010523	negative regulation of calcium ion trans...	5	3	1.86	0.26929	1
GO:0010606	positive regulation of cytoplasmic mRNA ...	5	3	1.86	0.26929	1
GO:0010886	positive regulation of cholesterol stora...	5	3	1.86	0.26929	1
GO:0010887	negative regulation of cholesterol stora...	5	3	1.86	0.26929	1
GO:0014832	urinary bladder smooth muscle contractio...	5	3	1.86	0.26929	1
GO:0015865	purine nucleotide transport	5	3	1.86	0.26929	1
GO:0015868	purine ribonucleotide transport	5	3	1.86	0.26929	1
GO:0015886	heme transport	5	3	1.86	0.26929	1
GO:0016198	axon choice point recognition	5	3	1.86	0.26929	1
GO:0016233	telomere capping	5	3	1.86	0.26929	1
GO:0018126	protein hydroxylation	5	3	1.86	0.26929	1
GO:0018298	protein-chromophore linkage	5	3	1.86	0.26929	1
GO:0030825	positive regulation of cGMP metabolic pr...	5	3	1.86	0.26929	1
GO:0030916	otic vesicle formation	5	3	1.86	0.26929	1
GO:0031665	negative regulation of lipopolysaccharid...	5	3	1.86	0.26929	1
GO:0032000	positive regulation of fatty acid beta-o...	5	3	1.86	0.26929	1
GO:0032057	negative regulation of translational ini...	5	3	1.86	0.26929	1
GO:0032095	regulation of response to food	5	3	1.86	0.26929	1
GO:0032305	positive regulation of icosanoid secreti...	5	3	1.86	0.26929	1
GO:0032525	somite rostral/caudal axis specification	5	3	1.86	0.26929	1
GO:0032959	inositol trisphosphate biosynthetic proc...	5	3	1.86	0.26929	1
GO:0035095	behavioral response to nicotine	5	3	1.86	0.26929	1
GO:0035561	regulation of chromatin binding	5	3	1.86	0.26929	1
GO:0036149	phosphatidylinositol acyl-chain remodeli...	5	3	1.86	0.26929	1
GO:0036155	acylglycerol acyl-chain remodeling	5	3	1.86	0.26929	1
GO:0039530	MDA-5 signaling pathway	5	3	1.86	0.26929	1
GO:0042407	cristae formation	5	3	1.86	0.26929	1
GO:0042726	flavin-containing compound metabolic pro...	5	3	1.86	0.26929	1
GO:0042997	negative regulation of Golgi to plasma m...	5	3	1.86	0.26929	1
GO:0043153	entrainment of circadian clock by photop...	5	3	1.86	0.26929	1
GO:0043497	regulation of protein heterodimerization...	5	3	1.86	0.26929	1
GO:0045003	double-strand break repair via synthesis...	5	3	1.86	0.26929	1
GO:0045625	regulation of T-helper 1 cell differenti...	5	3	1.86	0.26929	1
GO:0045647	negative regulation of erythrocyte diffe...	5	3	1.86	0.26929	1
GO:0046415	urate metabolic process	5	3	1.86	0.26929	1
GO:0046666	retinal cell programmed cell death	5	3	1.86	0.26929	1
GO:0048102	autophagic cell death	5	3	1.86	0.26929	1
GO:0048319	axial mesoderm morphogenesis	5	3	1.86	0.26929	1
GO:0051103	DNA ligation involved in DNA repair	5	3	1.86	0.26929	1
GO:0051503	adenine nucleotide transport	5	3	1.86	0.26929	1
GO:0051954	positive regulation of amine transport	5	3	1.86	0.26929	1
GO:0060024	rhythmic synaptic transmission	5	3	1.86	0.26929	1
GO:0060028	convergent extension involved in axis el...	5	3	1.86	0.26929	1
GO:0060059	embryonic retina morphogenesis in camera...	5	3	1.86	0.26929	1
GO:0060261	positive regulation of transcription ini...	5	3	1.86	0.26929	1
GO:0060456	positive regulation of digestive system ...	5	3	1.86	0.26929	1
GO:0060502	epithelial cell proliferation involved i...	5	3	1.86	0.26929	1
GO:0060576	intestinal epithelial cell development	5	3	1.86	0.26929	1
GO:0060613	fat pad development	5	3	1.86	0.26929	1
GO:0060947	cardiac vascular smooth muscle cell diff...	5	3	1.86	0.26929	1
GO:0060977	coronary vasculature morphogenesis	5	3	1.86	0.26929	1
GO:0070189	kynurenine metabolic process	5	3	1.86	0.26929	1
GO:0070365	hepatocyte differentiation	5	3	1.86	0.26929	1
GO:0070535	histone H2A K63-linked ubiquitination	5	3	1.86	0.26929	1
GO:0072014	proximal tubule development	5	3	1.86	0.26929	1
GO:0072182	regulation of nephron tubule epithelial ...	5	3	1.86	0.26929	1
GO:0072202	cell differentiation involved in metanep...	5	3	1.86	0.26929	1
GO:0090153	regulation of sphingolipid biosynthetic ...	5	3	1.86	0.26929	1
GO:0090205	positive regulation of cholesterol metab...	5	3	1.86	0.26929	1
GO:0090331	negative regulation of platelet aggregat...	5	3	1.86	0.26929	1
GO:0097531	mast cell migration	5	3	1.86	0.26929	1
GO:1900015	regulation of cytokine production involv...	5	3	1.86	0.26929	1
GO:1900025	negative regulation of substrate adhesio...	5	3	1.86	0.26929	1
GO:1900119	positive regulation of execution phase o...	5	3	1.86	0.26929	1
GO:1901679	nucleotide transmembrane transport	5	3	1.86	0.26929	1
GO:2000188	regulation of cholesterol homeostasis	5	3	1.86	0.26929	1
GO:2000303	regulation of ceramide biosynthetic proc...	5	3	1.86	0.26929	1
GO:2000831	regulation of steroid hormone secretion	5	3	1.86	0.26929	1
GO:0021536	diencephalon development	65	27	24.14	0.26972	1
GO:0009163	nucleoside biosynthetic process	96	39	35.66	0.27127	1
GO:0001913	T cell mediated cytotoxicity	17	8	6.31	0.27159	1
GO:0002066	columnar/cuboidal epithelial cell develo...	17	8	6.31	0.27159	1
GO:0002637	regulation of immunoglobulin production	17	8	6.31	0.27159	1
GO:0003179	heart valve morphogenesis	17	8	6.31	0.27159	1
GO:0021952	central nervous system projection neuron...	17	8	6.31	0.27159	1
GO:0030225	macrophage differentiation	17	8	6.31	0.27159	1
GO:0032488	Cdc42 protein signal transduction	17	8	6.31	0.27159	1
GO:0032489	regulation of Cdc42 protein signal trans...	17	8	6.31	0.27159	1
GO:0032612	interleukin-1 production	17	8	6.31	0.27159	1
GO:0035094	response to nicotine	17	8	6.31	0.27159	1
GO:0044246	regulation of multicellular organismal m...	17	8	6.31	0.27159	1
GO:0045071	negative regulation of viral genome repl...	17	8	6.31	0.27159	1
GO:0045494	photoreceptor cell maintenance	17	8	6.31	0.27159	1
GO:0046132	pyrimidine ribonucleoside biosynthetic p...	17	8	6.31	0.27159	1
GO:0046627	negative regulation of insulin receptor ...	17	8	6.31	0.27159	1
GO:0050869	negative regulation of B cell activation	17	8	6.31	0.27159	1
GO:0052646	alditol phosphate metabolic process	17	8	6.31	0.27159	1
GO:0071526	semaphorin-plexin signaling pathway	17	8	6.31	0.27159	1
GO:0021539	subthalamus development	37	16	13.74	0.27172	1
GO:0045744	negative regulation of G-protein coupled...	37	16	13.74	0.27172	1
GO:0030258	lipid modification	109	44	40.49	0.27222	1
GO:0071216	cellular response to biotic stimulus	78	32	28.97	0.27389	1
GO:0090382	phagosome maturation	32	14	11.89	0.27394	1
GO:0001936	regulation of endothelial cell prolifera...	60	25	22.29	0.27411	1
GO:0000578	embryonic axis specification	22	10	8.17	0.27490	1
GO:0002042	cell migration involved in sprouting ang...	22	10	8.17	0.27490	1
GO:0015988	energy coupled proton transmembrane tran...	22	10	8.17	0.27490	1
GO:0015991	ATP hydrolysis coupled proton transport	22	10	8.17	0.27490	1
GO:0030858	positive regulation of epithelial cell d...	22	10	8.17	0.27490	1
GO:0046686	response to cadmium ion	22	10	8.17	0.27490	1
GO:0002690	positive regulation of leukocyte chemota...	27	12	10.03	0.27523	1
GO:0010463	mesenchymal cell proliferation	27	12	10.03	0.27523	1
GO:0030816	positive regulation of cAMP metabolic pr...	27	12	10.03	0.27523	1
GO:0033865	nucleoside bisphosphate metabolic proces...	27	12	10.03	0.27523	1
GO:0033875	ribonucleoside bisphosphate metabolic pr...	27	12	10.03	0.27523	1
GO:0034032	purine nucleoside bisphosphate metabolic...	27	12	10.03	0.27523	1
GO:0043928	exonucleolytic nuclear-transcribed mRNA ...	27	12	10.03	0.27523	1
GO:0007601	visual perception	91	37	33.8	0.27615	1
GO:0016050	vesicle organization	117	47	43.46	0.27729	1
GO:0031668	cellular response to extracellular stimu...	117	47	43.46	0.27729	1
GO:0044087	regulation of cellular component biogene...	327	127	121.46	0.27749	1
GO:0051262	protein tetramerization	73	30	27.11	0.27874	1
GO:0051494	negative regulation of cytoskeleton orga...	73	30	27.11	0.27874	1
GO:0051091	positive regulation of sequence-specific...	138	55	51.26	0.28086	1
GO:0006633	fatty acid biosynthetic process	86	35	31.94	0.28118	1
GO:0034284	response to monosaccharide	86	35	31.94	0.28118	1
GO:0019932	second-messenger-mediated signaling	99	40	36.77	0.28223	1
GO:2001234	negative regulation of apoptotic signali...	112	45	41.6	0.28236	1
GO:0001676	long-chain fatty acid metabolic process	50	21	18.57	0.28301	1
GO:0032940	secretion by cell	457	176	169.74	0.28307	1
GO:0002790	peptide secretion	133	53	49.4	0.28595	1
GO:0061448	connective tissue development	120	48	44.57	0.28702	1
GO:0043467	regulation of generation of precursor me...	45	19	16.71	0.28747	1
GO:0048145	regulation of fibroblast proliferation	45	19	16.71	0.28747	1
GO:0051289	protein homotetramerization	45	19	16.71	0.28747	1
GO:2000117	negative regulation of cysteine-type end...	45	19	16.71	0.28747	1
GO:0022412	cellular process involved in reproductio...	107	43	39.74	0.28760	1
GO:0051480	cytosolic calcium ion homeostasis	107	43	39.74	0.28760	1
GO:0007498	mesoderm development	63	26	23.4	0.28886	1
GO:0030595	leukocyte chemotaxis	63	26	23.4	0.28886	1
GO:0007605	sensory perception of sound	76	31	28.23	0.29178	1
GO:0002562	somatic diversification of immune recept...	35	15	13	0.29606	1
GO:0016444	somatic cell DNA recombination	35	15	13	0.29606	1
GO:0030433	ER-associated ubiquitin-dependent protei...	35	15	13	0.29606	1
GO:0032011	ARF protein signal transduction	35	15	13	0.29606	1
GO:0032012	regulation of ARF protein signal transdu...	35	15	13	0.29606	1
GO:0032092	positive regulation of protein binding	35	15	13	0.29606	1
GO:0042632	cholesterol homeostasis	35	15	13	0.29606	1
GO:0045087	innate immune response	474	182	176.05	0.29687	1
GO:0006415	translational termination	10	5	3.71	0.29719	1
GO:0006525	arginine metabolic process	10	5	3.71	0.29719	1
GO:0006622	protein targeting to lysosome	10	5	3.71	0.29719	1
GO:0006623	protein targeting to vacuole	10	5	3.71	0.29719	1
GO:0006750	glutathione biosynthetic process	10	5	3.71	0.29719	1
GO:0007567	parturition	10	5	3.71	0.29719	1
GO:0009071	serine family amino acid catabolic proce...	10	5	3.71	0.29719	1
GO:0010225	response to UV-C	10	5	3.71	0.29719	1
GO:0010866	regulation of triglyceride biosynthetic ...	10	5	3.71	0.29719	1
GO:0014829	vascular smooth muscle contraction	10	5	3.71	0.29719	1
GO:0015872	dopamine transport	10	5	3.71	0.29719	1
GO:0016239	positive regulation of macroautophagy	10	5	3.71	0.29719	1
GO:0030194	positive regulation of blood coagulation	10	5	3.71	0.29719	1
GO:0031664	regulation of lipopolysaccharide-mediate...	10	5	3.71	0.29719	1
GO:0033151	V(D)J recombination	10	5	3.71	0.29719	1
GO:0042094	interleukin-2 biosynthetic process	10	5	3.71	0.29719	1
GO:0043558	regulation of translational initiation i...	10	5	3.71	0.29719	1
GO:0043584	nose development	10	5	3.71	0.29719	1
GO:0045671	negative regulation of osteoclast differ...	10	5	3.71	0.29719	1
GO:0045987	positive regulation of smooth muscle con...	10	5	3.71	0.29719	1
GO:0048016	inositol phosphate-mediated signaling	10	5	3.71	0.29719	1
GO:0048557	embryonic digestive tract morphogenesis	10	5	3.71	0.29719	1
GO:0050909	sensory perception of taste	10	5	3.71	0.29719	1
GO:0050919	negative chemotaxis	10	5	3.71	0.29719	1
GO:0070233	negative regulation of T cell apoptotic ...	10	5	3.71	0.29719	1
GO:0070841	inclusion body assembly	10	5	3.71	0.29719	1
GO:0072215	regulation of metanephros development	10	5	3.71	0.29719	1
GO:0072666	establishment of protein localization to...	10	5	3.71	0.29719	1
GO:1900027	regulation of ruffle assembly	10	5	3.71	0.29719	1
GO:1900048	positive regulation of hemostasis	10	5	3.71	0.29719	1
GO:1900151	regulation of nuclear-transcribed mRNA c...	10	5	3.71	0.29719	1
GO:1901659	glycosyl compound biosynthetic process	97	39	36.03	0.29867	1
GO:0006873	cellular ion homeostasis	236	92	87.66	0.29868	1
GO:0005977	glycogen metabolic process	53	22	19.69	0.29958	1
GO:0006073	cellular glucan metabolic process	53	22	19.69	0.29958	1
GO:0022407	regulation of cell-cell adhesion	53	22	19.69	0.29958	1
GO:0044042	glucan metabolic process	53	22	19.69	0.29958	1
GO:0044243	multicellular organismal catabolic proce...	53	22	19.69	0.29958	1
GO:0042102	positive regulation of T cell proliferat...	30	13	11.14	0.29992	1
GO:0045047	protein targeting to ER	30	13	11.14	0.29992	1
GO:0046677	response to antibiotic	30	13	11.14	0.29992	1
GO:0071621	granulocyte chemotaxis	30	13	11.14	0.29992	1
GO:1901653	cellular response to peptide	215	84	79.86	0.30005	1
GO:0050678	regulation of epithelial cell proliferat...	152	60	56.46	0.30155	1
GO:0016477	cell migration	610	233	226.57	0.30299	1
GO:0001954	positive regulation of cell-matrix adhes...	25	11	9.29	0.30312	1
GO:0007588	excretion	25	11	9.29	0.30312	1
GO:0010633	negative regulation of epithelial cell m...	25	11	9.29	0.30312	1
GO:0030004	cellular monovalent inorganic cation hom...	25	11	9.29	0.30312	1
GO:0030819	positive regulation of cAMP biosynthetic...	25	11	9.29	0.30312	1
GO:0032602	chemokine production	25	11	9.29	0.30312	1
GO:0032885	regulation of polysaccharide biosyntheti...	25	11	9.29	0.30312	1
GO:0050764	regulation of phagocytosis	25	11	9.29	0.30312	1
GO:0007162	negative regulation of cell adhesion	66	27	24.51	0.30318	1
GO:0070661	leukocyte proliferation	105	42	39	0.30368	1
GO:0002090	regulation of receptor internalization	15	7	5.57	0.30428	1
GO:0002455	humoral immune response mediated by circ...	15	7	5.57	0.30428	1
GO:0006929	substrate-dependent cell migration	15	7	5.57	0.30428	1
GO:0007520	myoblast fusion	15	7	5.57	0.30428	1
GO:0009067	aspartate family amino acid biosynthetic...	15	7	5.57	0.30428	1
GO:0009072	aromatic amino acid family metabolic pro...	15	7	5.57	0.30428	1
GO:0010043	response to zinc ion	15	7	5.57	0.30428	1
GO:0019400	alditol metabolic process	15	7	5.57	0.30428	1
GO:0021846	cell proliferation in forebrain	15	7	5.57	0.30428	1
GO:0030195	negative regulation of blood coagulation	15	7	5.57	0.30428	1
GO:0031050	dsRNA fragmentation	15	7	5.57	0.30428	1
GO:0031063	regulation of histone deacetylation	15	7	5.57	0.30428	1
GO:0032652	regulation of interleukin-1 production	15	7	5.57	0.30428	1
GO:0033866	nucleoside bisphosphate biosynthetic pro...	15	7	5.57	0.30428	1
GO:0033962	cytoplasmic mRNA processing body assembl...	15	7	5.57	0.30428	1
GO:0034030	ribonucleoside bisphosphate biosynthetic...	15	7	5.57	0.30428	1
GO:0034033	purine nucleoside bisphosphate biosynthe...	15	7	5.57	0.30428	1
GO:0042036	negative regulation of cytokine biosynth...	15	7	5.57	0.30428	1
GO:0042149	cellular response to glucose starvation	15	7	5.57	0.30428	1
GO:0042462	eye photoreceptor cell development	15	7	5.57	0.30428	1
GO:0043088	regulation of Cdc42 GTPase activity	15	7	5.57	0.30428	1
GO:0045005	maintenance of fidelity involved in DNA-...	15	7	5.57	0.30428	1
GO:0045429	positive regulation of nitric oxide bios...	15	7	5.57	0.30428	1
GO:0046320	regulation of fatty acid oxidation	15	7	5.57	0.30428	1
GO:0046854	phosphatidylinositol phosphorylation	15	7	5.57	0.30428	1
GO:0061013	regulation of mRNA catabolic process	15	7	5.57	0.30428	1
GO:0070918	production of small RNA involved in gene...	15	7	5.57	0.30428	1
GO:0071384	cellular response to corticosteroid stim...	15	7	5.57	0.30428	1
GO:1900047	negative regulation of hemostasis	15	7	5.57	0.30428	1
GO:0009063	cellular amino acid catabolic process	79	32	29.34	0.30452	1
GO:0009108	coenzyme biosynthetic process	92	37	34.17	0.30452	1
GO:0006111	regulation of gluconeogenesis	20	9	7.43	0.30503	1
GO:0009081	branched-chain amino acid metabolic proc...	20	9	7.43	0.30503	1
GO:0009218	pyrimidine ribonucleotide metabolic proc...	20	9	7.43	0.30503	1
GO:0010559	regulation of glycoprotein biosynthetic ...	20	9	7.43	0.30503	1
GO:0017158	regulation of calcium ion-dependent exoc...	20	9	7.43	0.30503	1
GO:0032845	negative regulation of homeostatic proce...	20	9	7.43	0.30503	1
GO:0034381	plasma lipoprotein particle clearance	20	9	7.43	0.30503	1
GO:0043276	anoikis	20	9	7.43	0.30503	1
GO:0043299	leukocyte degranulation	20	9	7.43	0.30503	1
GO:0051057	positive regulation of small GTPase medi...	20	9	7.43	0.30503	1
GO:0007286	spermatid development	48	20	17.83	0.30518	1
GO:0042063	gliogenesis	113	45	41.97	0.30810	1
GO:0006508	proteolysis	717	273	266.31	0.30879	1
GO:0050708	regulation of protein secretion	61	25	22.66	0.30922	1
GO:0015849	organic acid transport	134	53	49.77	0.30965	1
GO:0046942	carboxylic acid transport	134	53	49.77	0.30965	1
GO:0018212	peptidyl-tyrosine modification	155	61	57.57	0.30995	1
GO:0046474	glycerophospholipid biosynthetic process	155	61	57.57	0.30995	1
GO:0001656	metanephros development	43	18	15.97	0.31092	1
GO:0006283	transcription-coupled nucleotide-excisio...	43	18	15.97	0.31092	1
GO:0015748	organophosphate ester transport	43	18	15.97	0.31092	1
GO:0043154	negative regulation of cysteine-type end...	43	18	15.97	0.31092	1
GO:0043507	positive regulation of JUN kinase activi...	43	18	15.97	0.31092	1
GO:0043534	blood vessel endothelial cell migration	43	18	15.97	0.31092	1
GO:0046849	bone remodeling	43	18	15.97	0.31092	1
GO:0042127	regulation of cell proliferation	776	295	288.22	0.31271	1
GO:0002703	regulation of leukocyte mediated immunit...	56	23	20.8	0.31552	1
GO:0009142	nucleoside triphosphate biosynthetic pro...	56	23	20.8	0.31552	1
GO:0002429	immune response-activating cell surface ...	129	51	47.91	0.31555	1
GO:0006835	dicarboxylic acid transport	38	16	14.11	0.31678	1
GO:0017156	calcium ion-dependent exocytosis	38	16	14.11	0.31678	1
GO:0007281	germ cell development	82	33	30.46	0.31697	1
GO:0009746	response to hexose	82	33	30.46	0.31697	1
GO:0045017	glycerolipid biosynthetic process	179	70	66.48	0.31716	1
GO:0071375	cellular response to peptide hormone sti...	208	81	77.26	0.31736	1
GO:0008284	positive regulation of cell proliferatio...	412	158	153.03	0.31943	1
GO:0006470	protein dephosphorylation	124	49	46.06	0.32167	1
GO:0030003	cellular cation homeostasis	232	90	86.17	0.32194	1
GO:0010976	positive regulation of neuron projection...	51	21	18.94	0.32211	1
GO:1901699	cellular response to nitrogen compound	322	124	119.6	0.32229	1
GO:0042490	mechanoreceptor differentiation	33	14	12.26	0.32272	1
GO:0002263	cell activation involved in immune respo...	77	31	28.6	0.32361	1
GO:0002366	leukocyte activation involved in immune ...	77	31	28.6	0.32361	1
GO:0055082	cellular chemical homeostasis	285	110	105.86	0.32370	1
GO:2000145	regulation of cell motility	338	130	125.54	0.32377	1
GO:0034138	toll-like receptor 3 signaling pathway	64	26	23.77	0.32380	1
GO:0071222	cellular response to lipopolysaccharide	64	26	23.77	0.32380	1
GO:0018108	peptidyl-tyrosine phosphorylation	153	60	56.83	0.32416	1
GO:0048864	stem cell development	153	60	56.83	0.32416	1
GO:0032956	regulation of actin cytoskeleton organiz...	161	63	59.8	0.32652	1
GO:0060560	developmental growth involved in morphog...	98	39	36.4	0.32700	1
GO:0048232	male gamete generation	227	88	84.31	0.32728	1
GO:0000082	G1/S transition of mitotic cell cycle	198	77	73.54	0.32838	1
GO:0000289	nuclear-transcribed mRNA poly(A) tail sh...	28	12	10.4	0.32866	1
GO:0006270	DNA replication initiation	28	12	10.4	0.32866	1
GO:0006614	SRP-dependent cotranslational protein ta...	28	12	10.4	0.32866	1
GO:0006418	tRNA aminoacylation for protein translat...	46	19	17.09	0.32900	1
GO:0050671	positive regulation of lymphocyte prolif...	46	19	17.09	0.32900	1
GO:0061025	membrane fusion	85	34	31.57	0.32913	1
GO:2000021	regulation of ion homeostasis	85	34	31.57	0.32913	1
GO:2001242	regulation of intrinsic apoptotic signal...	85	34	31.57	0.32913	1
GO:0007568	aging	148	58	54.97	0.33025	1
GO:0031638	zymogen activation	72	29	26.74	0.33057	1
GO:0042098	T cell proliferation	72	29	26.74	0.33057	1
GO:0030799	regulation of cyclic nucleotide metaboli...	59	24	21.91	0.33086	1
GO:0048610	cellular process involved in reproductio...	267	103	99.17	0.33292	1
GO:0051146	striated muscle cell differentiation	135	53	50.14	0.33400	1
GO:0006486	protein glycosylation	193	75	71.68	0.33411	1
GO:0043413	macromolecule glycosylation	193	75	71.68	0.33411	1
GO:0002673	regulation of acute inflammatory respons...	23	10	8.54	0.33438	1
GO:0007189	adenylate cyclase-activating G-protein c...	23	10	8.54	0.33438	1
GO:0007606	sensory perception of chemical stimulus	23	10	8.54	0.33438	1
GO:0007618	mating	23	10	8.54	0.33438	1
GO:0008038	neuron recognition	23	10	8.54	0.33438	1
GO:0030641	regulation of cellular pH	23	10	8.54	0.33438	1
GO:0032570	response to progesterone	23	10	8.54	0.33438	1
GO:0032642	regulation of chemokine production	23	10	8.54	0.33438	1
GO:0045428	regulation of nitric oxide biosynthetic ...	23	10	8.54	0.33438	1
GO:0048640	negative regulation of developmental gro...	23	10	8.54	0.33438	1
GO:0051453	regulation of intracellular pH	23	10	8.54	0.33438	1
GO:0060323	head morphogenesis	23	10	8.54	0.33438	1
GO:0070979	protein K11-linked ubiquitination	23	10	8.54	0.33438	1
GO:2000107	negative regulation of leukocyte apoptot...	23	10	8.54	0.33438	1
GO:0016458	gene silencing	80	32	29.71	0.33622	1
GO:0006026	aminoglycan catabolic process	41	17	15.23	0.33625	1
GO:0032501	multicellular organismal process	3497	1309	1298.87	0.33654	1
GO:0050852	T cell receptor signaling pathway	67	27	24.89	0.33789	1
GO:0050688	regulation of defense response to virus	54	22	20.06	0.33830	1
GO:0052652	cyclic purine nucleotide metabolic proce...	54	22	20.06	0.33830	1
GO:0055088	lipid homeostasis	54	22	20.06	0.33830	1
GO:0051259	protein oligomerization	270	104	100.28	0.33907	1
GO:0051050	positive regulation of transport	339	130	125.91	0.33936	1
GO:0002548	monocyte chemotaxis	18	8	6.69	0.33946	1
GO:0002832	negative regulation of response to bioti...	18	8	6.69	0.33946	1
GO:0003170	heart valve development	18	8	6.69	0.33946	1
GO:0006110	regulation of glycolysis	18	8	6.69	0.33946	1
GO:0007616	long-term memory	18	8	6.69	0.33946	1
GO:0009083	branched-chain amino acid catabolic proc...	18	8	6.69	0.33946	1
GO:0034405	response to fluid shear stress	18	8	6.69	0.33946	1
GO:0046834	lipid phosphorylation	18	8	6.69	0.33946	1
GO:0050819	negative regulation of coagulation	18	8	6.69	0.33946	1
GO:0060334	regulation of interferon-gamma-mediated ...	18	8	6.69	0.33946	1
GO:0072525	pyridine-containing compound biosyntheti...	18	8	6.69	0.33946	1
GO:0000085	mitotic G2 phase	8	4	2.97	0.34055	1
GO:0000733	DNA strand renaturation	8	4	2.97	0.34055	1
GO:0002825	regulation of T-helper 1 type immune res...	8	4	2.97	0.34055	1
GO:0002833	positive regulation of response to bioti...	8	4	2.97	0.34055	1
GO:0003203	endocardial cushion morphogenesis	8	4	2.97	0.34055	1
GO:0003214	cardiac left ventricle morphogenesis	8	4	2.97	0.34055	1
GO:0003417	growth plate cartilage development	8	4	2.97	0.34055	1
GO:0006020	inositol metabolic process	8	4	2.97	0.34055	1
GO:0006268	DNA unwinding involved in DNA replicatio...	8	4	2.97	0.34055	1
GO:0006782	protoporphyrinogen IX biosynthetic proce...	8	4	2.97	0.34055	1
GO:0007252	I-kappaB phosphorylation	8	4	2.97	0.34055	1
GO:0007350	blastoderm segmentation	8	4	2.97	0.34055	1
GO:0007351	tripartite regional subdivision	8	4	2.97	0.34055	1
GO:0007440	foregut morphogenesis	8	4	2.97	0.34055	1
GO:0007494	midgut development	8	4	2.97	0.34055	1
GO:0007512	adult heart development	8	4	2.97	0.34055	1
GO:0008595	anterior/posterior axis specification, e...	8	4	2.97	0.34055	1
GO:0010870	positive regulation of receptor biosynth...	8	4	2.97	0.34055	1
GO:0014046	dopamine secretion	8	4	2.97	0.34055	1
GO:0014059	regulation of dopamine secretion	8	4	2.97	0.34055	1
GO:0021513	spinal cord dorsal/ventral patterning	8	4	2.97	0.34055	1
GO:0021602	cranial nerve morphogenesis	8	4	2.97	0.34055	1
GO:0031116	positive regulation of microtubule polym...	8	4	2.97	0.34055	1
GO:0032495	response to muramyl dipeptide	8	4	2.97	0.34055	1
GO:0032620	interleukin-17 production	8	4	2.97	0.34055	1
GO:0032660	regulation of interleukin-17 production	8	4	2.97	0.34055	1
GO:0032689	negative regulation of interferon-gamma ...	8	4	2.97	0.34055	1
GO:0032863	activation of Rac GTPase activity	8	4	2.97	0.34055	1
GO:0033173	calcineurin-NFAT signaling cascade	8	4	2.97	0.34055	1
GO:0033240	positive regulation of cellular amine me...	8	4	2.97	0.34055	1
GO:0034763	negative regulation of transmembrane tra...	8	4	2.97	0.34055	1
GO:0034766	negative regulation of ion transmembrane...	8	4	2.97	0.34055	1
GO:0042135	neurotransmitter catabolic process	8	4	2.97	0.34055	1
GO:0042573	retinoic acid metabolic process	8	4	2.97	0.34055	1
GO:0043304	regulation of mast cell degranulation	8	4	2.97	0.34055	1
GO:0046051	UTP metabolic process	8	4	2.97	0.34055	1
GO:0046135	pyrimidine nucleoside catabolic process	8	4	2.97	0.34055	1
GO:0048711	positive regulation of astrocyte differe...	8	4	2.97	0.34055	1
GO:0048843	negative regulation of axon extension in...	8	4	2.97	0.34055	1
GO:0050482	arachidonic acid secretion	8	4	2.97	0.34055	1
GO:0051319	G2 phase	8	4	2.97	0.34055	1
GO:0051782	negative regulation of cell division	8	4	2.97	0.34055	1
GO:0055090	acylglycerol homeostasis	8	4	2.97	0.34055	1
GO:0060142	regulation of syncytium formation by pla...	8	4	2.97	0.34055	1
GO:0060600	dichotomous subdivision of an epithelial...	8	4	2.97	0.34055	1
GO:0070168	negative regulation of biomineral tissue...	8	4	2.97	0.34055	1
GO:0070328	triglyceride homeostasis	8	4	2.97	0.34055	1
GO:0072148	epithelial cell fate commitment	8	4	2.97	0.34055	1
GO:0097150	neuronal stem cell maintenance	8	4	2.97	0.34055	1
GO:0097237	cellular response to toxic substance	8	4	2.97	0.34055	1
GO:1902117	positive regulation of organelle assembl...	8	4	2.97	0.34055	1
GO:2001212	regulation of vasculogenesis	8	4	2.97	0.34055	1
GO:0006457	protein folding	159	62	59.06	0.34090	1
GO:0006261	DNA-dependent DNA replication	109	43	40.49	0.34147	1
GO:0001964	startle response	13	6	4.83	0.34275	1
GO:0006071	glycerol metabolic process	13	6	4.83	0.34275	1
GO:0006688	glycosphingolipid biosynthetic process	13	6	4.83	0.34275	1
GO:0007271	synaptic transmission, cholinergic	13	6	4.83	0.34275	1
GO:0007413	axonal fasciculation	13	6	4.83	0.34275	1
GO:0009068	aspartate family amino acid catabolic pr...	13	6	4.83	0.34275	1
GO:0009208	pyrimidine ribonucleoside triphosphate m...	13	6	4.83	0.34275	1
GO:0010762	regulation of fibroblast migration	13	6	4.83	0.34275	1
GO:0030104	water homeostasis	13	6	4.83	0.34275	1
GO:0032651	regulation of interleukin-1 beta product...	13	6	4.83	0.34275	1
GO:0032800	receptor biosynthetic process	13	6	4.83	0.34275	1
GO:0032965	regulation of collagen biosynthetic proc...	13	6	4.83	0.34275	1
GO:0043303	mast cell degranulation	13	6	4.83	0.34275	1
GO:0043555	regulation of translation in response to...	13	6	4.83	0.34275	1
GO:0045649	regulation of macrophage differentiation	13	6	4.83	0.34275	1
GO:0050873	brown fat cell differentiation	13	6	4.83	0.34275	1
GO:0051894	positive regulation of focal adhesion as...	13	6	4.83	0.34275	1
GO:0061014	positive regulation of mRNA catabolic pr...	13	6	4.83	0.34275	1
GO:0072665	protein localization to vacuole	13	6	4.83	0.34275	1
GO:0090207	regulation of triglyceride metabolic pro...	13	6	4.83	0.34275	1
GO:1901890	positive regulation of cell junction ass...	13	6	4.83	0.34275	1
GO:2000058	regulation of protein ubiquitination inv...	13	6	4.83	0.34275	1
GO:2000401	regulation of lymphocyte migration	13	6	4.83	0.34275	1
GO:2000826	regulation of heart morphogenesis	13	6	4.83	0.34275	1
GO:0044259	multicellular organismal macromolecule m...	75	30	27.86	0.34368	1
GO:0050670	regulation of lymphocyte proliferation	75	30	27.86	0.34368	1
GO:0070585	protein localization to mitochondrion	75	30	27.86	0.34368	1
GO:0016485	protein processing	795	301	295.28	0.34382	1
GO:0001906	cell killing	36	15	13.37	0.34388	1
GO:0006312	mitotic recombination	36	15	13.37	0.34388	1
GO:0045638	negative regulation of myeloid cell diff...	36	15	13.37	0.34388	1
GO:0050714	positive regulation of protein secretion	36	15	13.37	0.34388	1
GO:0061097	regulation of protein tyrosine kinase ac...	36	15	13.37	0.34388	1
GO:0072522	purine-containing compound biosynthetic ...	146	57	54.23	0.34529	1
GO:0010594	regulation of endothelial cell migration	62	25	23.03	0.34562	1
GO:0055072	iron ion homeostasis	62	25	23.03	0.34562	1
GO:0032868	response to insulin	183	71	67.97	0.34607	1
GO:0006998	nuclear envelope organization	49	20	18.2	0.34619	1
GO:0006576	cellular biogenic amine metabolic proces...	83	33	30.83	0.34851	1
GO:0043410	positive regulation of MAPK cascade	215	83	79.86	0.35112	1
GO:0051384	response to glucocorticoid	70	28	26	0.35153	1
GO:0006636	unsaturated fatty acid biosynthetic proc...	31	13	11.51	0.35195	1
GO:0006885	regulation of pH	31	13	11.51	0.35195	1
GO:0034508	centromere complex assembly	31	13	11.51	0.35195	1
GO:0072599	establishment of protein localization to...	31	13	11.51	0.35195	1
GO:0046486	glycerolipid metabolic process	231	89	85.8	0.35307	1
GO:0035666	TRIF-dependent toll-like receptor signal...	57	23	21.17	0.35381	1
GO:0097202	activation of cysteine-type endopeptidas...	57	23	21.17	0.35381	1
GO:0006611	protein export from nucleus	44	18	16.34	0.35459	1
GO:0034754	cellular hormone metabolic process	44	18	16.34	0.35459	1
GO:0072001	renal system development	157	61	58.31	0.35571	1
GO:0048592	eye morphogenesis	78	31	28.97	0.35640	1
GO:0050776	regulation of immune response	420	160	156	0.35753	1
GO:0007283	spermatogenesis	226	87	83.94	0.35896	1
GO:0030324	lung development	107	42	39.74	0.35912	1
GO:0030334	regulation of cell migration	319	122	118.48	0.35964	1
GO:0006820	anion transport	234	90	86.91	0.35976	1
GO:0030154	cell differentiation	1868	701	693.82	0.36045	1
GO:0001895	retina homeostasis	26	11	9.66	0.36050	1
GO:0002275	myeloid cell activation involved in immu...	26	11	9.66	0.36050	1
GO:0006940	regulation of smooth muscle contraction	26	11	9.66	0.36050	1
GO:0042044	fluid transport	26	11	9.66	0.36050	1
GO:0071377	cellular response to glucagon stimulus	26	11	9.66	0.36050	1
GO:0072009	nephron epithelium development	26	11	9.66	0.36050	1
GO:0007005	mitochondrion organization	250	96	92.86	0.36118	1
GO:0042692	muscle cell differentiation	189	73	70.2	0.36122	1
GO:0002285	lymphocyte activation involved in immune...	52	21	19.31	0.36254	1
GO:0002761	regulation of myeloid leukocyte differen...	52	21	19.31	0.36254	1
GO:0048515	spermatid differentiation	52	21	19.31	0.36254	1
GO:0010522	regulation of calcium ion transport into...	39	16	14.49	0.36359	1
GO:0030166	proteoglycan biosynthetic process	39	16	14.49	0.36359	1
GO:0006401	RNA catabolic process	123	48	45.68	0.36407	1
GO:0007009	plasma membrane organization	123	48	45.68	0.36407	1
GO:0002682	regulation of immune system process	618	234	229.54	0.36559	1
GO:0051049	regulation of transport	757	286	281.17	0.36621	1
GO:0031589	cell-substrate adhesion	176	68	65.37	0.36658	1
GO:1901564	organonitrogen compound metabolic proces...	1421	534	527.79	0.36664	1
GO:0051493	regulation of cytoskeleton organization	245	94	91	0.36703	1
GO:0097285	cell-type specific apoptotic process	245	94	91	0.36703	1
GO:0010466	negative regulation of peptidase activit...	81	32	30.09	0.36877	1
GO:0030833	regulation of actin filament polymerizat...	81	32	30.09	0.36877	1
GO:0050851	antigen receptor-mediated signaling path...	81	32	30.09	0.36877	1
GO:0030323	respiratory tube development	110	43	40.86	0.36942	1
GO:0001960	negative regulation of cytokine-mediated...	21	9	7.8	0.36956	1
GO:0002053	positive regulation of mesenchymal cell ...	21	9	7.8	0.36956	1
GO:0003044	regulation of systemic arterial blood pr...	21	9	7.8	0.36956	1
GO:0006584	catecholamine metabolic process	21	9	7.8	0.36956	1
GO:0009712	catechol-containing compound metabolic p...	21	9	7.8	0.36956	1
GO:0021696	cerebellar cortex morphogenesis	21	9	7.8	0.36956	1
GO:0032855	positive regulation of Rac GTPase activi...	21	9	7.8	0.36956	1
GO:0033344	cholesterol efflux	21	9	7.8	0.36956	1
GO:0046131	pyrimidine ribonucleoside metabolic proc...	21	9	7.8	0.36956	1
GO:0051898	negative regulation of protein kinase B ...	21	9	7.8	0.36956	1
GO:1902115	regulation of organelle assembly	21	9	7.8	0.36956	1
GO:0019953	sexual reproduction	357	136	132.6	0.37153	1
GO:0030036	actin cytoskeleton organization	357	136	132.6	0.37153	1
GO:0051093	negative regulation of developmental pro...	365	139	135.57	0.37165	1
GO:0019217	regulation of fatty acid metabolic proce...	47	19	17.46	0.37191	1
GO:0031047	gene silencing by RNA	47	19	17.46	0.37191	1
GO:0032946	positive regulation of mononuclear cell ...	47	19	17.46	0.37191	1
GO:0048609	multicellular organismal reproductive pr...	397	151	147.45	0.37196	1
GO:1902533	positive regulation of intracellular sig...	437	166	162.31	0.37203	1
GO:0032879	regulation of localization	1076	405	399.65	0.37205	1
GO:0042384	cilium assembly	89	35	33.06	0.37214	1
GO:0010876	lipid localization	163	63	60.54	0.37219	1
GO:0040011	locomotion	886	334	329.08	0.37274	1
GO:0000096	sulfur amino acid metabolic process	34	14	12.63	0.37333	1
GO:0002753	cytoplasmic pattern recognition receptor...	34	14	12.63	0.37333	1
GO:0006284	base-excision repair	34	14	12.63	0.37333	1
GO:0018958	phenol-containing compound metabolic pro...	34	14	12.63	0.37333	1
GO:0007254	JNK cascade	126	49	46.8	0.37356	1
GO:0010827	regulation of glucose transport	68	27	25.26	0.37357	1
GO:0008654	phospholipid biosynthetic process	179	69	66.48	0.37435	1
GO:0051051	negative regulation of transport	203	78	75.4	0.37683	1
GO:0002768	immune response-regulating cell surface ...	211	81	78.37	0.37750	1
GO:0032944	regulation of mononuclear cell prolifera...	76	30	28.23	0.37752	1
GO:0007155	cell adhesion	619	234	229.91	0.37773	1
GO:0000271	polysaccharide biosynthetic process	55	22	20.43	0.37814	1
GO:0009190	cyclic nucleotide biosynthetic process	55	22	20.43	0.37814	1
GO:0071495	cellular response to endogenous stimulus	587	222	218.03	0.37858	1
GO:0015012	heparan sulfate proteoglycan biosyntheti...	16	7	5.94	0.37910	1
GO:0031103	axon regeneration	16	7	5.94	0.37910	1
GO:0032862	activation of Rho GTPase activity	16	7	5.94	0.37910	1
GO:0044091	membrane biogenesis	16	7	5.94	0.37910	1
GO:0045736	negative regulation of cyclin-dependent ...	16	7	5.94	0.37910	1
GO:0060119	inner ear receptor cell development	16	7	5.94	0.37910	1
GO:0097178	ruffle assembly	16	7	5.94	0.37910	1
GO:1901021	positive regulation of calcium ion trans...	16	7	5.94	0.37910	1
GO:2000514	regulation of CD4-positive, alpha-beta T...	16	7	5.94	0.37910	1
GO:0044707	single-multicellular organism process	3394	1268	1260.61	0.38055	1
GO:0032504	multicellular organism reproduction	403	153	149.68	0.38197	1
GO:0019079	viral genome replication	42	17	15.6	0.38203	1
GO:0044275	cellular carbohydrate catabolic process	42	17	15.6	0.38203	1
GO:0046470	phosphatidylcholine metabolic process	42	17	15.6	0.38203	1
GO:0030072	peptide hormone secretion	129	50	47.91	0.38290	1
GO:0048583	regulation of response to stimulus	1871	701	694.93	0.38294	1
GO:0000291	nuclear-transcribed mRNA catabolic proce...	29	12	10.77	0.38399	1
GO:0006613	cotranslational protein targeting to mem...	29	12	10.77	0.38399	1
GO:0007193	adenylate cyclase-inhibiting G-protein c...	29	12	10.77	0.38399	1
GO:0033627	cell adhesion mediated by integrin	29	12	10.77	0.38399	1
GO:1900076	regulation of cellular response to insul...	29	12	10.77	0.38399	1
GO:0051098	regulation of binding	145	56	53.86	0.38548	1
GO:0051701	interaction with host	71	28	26.37	0.38680	1
GO:0007411	axon guidance	278	106	103.26	0.38695	1
GO:0097485	neuron projection guidance	278	106	103.26	0.38695	1
GO:0045596	negative regulation of cell differentiat...	294	112	109.2	0.38721	1
GO:0038093	Fc receptor signaling pathway	161	62	59.8	0.38747	1
GO:0030574	collagen catabolic process	50	20	18.57	0.38830	1
GO:0030802	regulation of cyclic nucleotide biosynth...	50	20	18.57	0.38830	1
GO:0050921	positive regulation of chemotaxis	50	20	18.57	0.38830	1
GO:0060349	bone morphogenesis	50	20	18.57	0.38830	1
GO:0007165	signal transduction	3035	1134	1127.27	0.38858	1
GO:0002686	negative regulation of leukocyte migrati...	11	5	4.09	0.38879	1
GO:0003094	glomerular filtration	11	5	4.09	0.38879	1
GO:0006004	fucose metabolic process	11	5	4.09	0.38879	1
GO:0006264	mitochondrial DNA replication	11	5	4.09	0.38879	1
GO:0006958	complement activation, classical pathway	11	5	4.09	0.38879	1
GO:0007214	gamma-aminobutyric acid signaling pathwa...	11	5	4.09	0.38879	1
GO:0009074	aromatic amino acid family catabolic pro...	11	5	4.09	0.38879	1
GO:0009110	vitamin biosynthetic process	11	5	4.09	0.38879	1
GO:0009130	pyrimidine nucleoside monophosphate bios...	11	5	4.09	0.38879	1
GO:0009310	amine catabolic process	11	5	4.09	0.38879	1
GO:0009435	NAD biosynthetic process	11	5	4.09	0.38879	1
GO:0010714	positive regulation of collagen metaboli...	11	5	4.09	0.38879	1
GO:0016024	CDP-diacylglycerol biosynthetic process	11	5	4.09	0.38879	1
GO:0017004	cytochrome complex assembly	11	5	4.09	0.38879	1
GO:0021756	striatum development	11	5	4.09	0.38879	1
GO:0022010	central nervous system myelination	11	5	4.09	0.38879	1
GO:0030207	chondroitin sulfate catabolic process	11	5	4.09	0.38879	1
GO:0031297	replication fork processing	11	5	4.09	0.38879	1
GO:0031639	plasminogen activation	11	5	4.09	0.38879	1
GO:0032291	axon ensheathment in central nervous sys...	11	5	4.09	0.38879	1
GO:0032878	regulation of establishment or maintenan...	11	5	4.09	0.38879	1
GO:0032922	circadian regulation of gene expression	11	5	4.09	0.38879	1
GO:0032967	positive regulation of collagen biosynth...	11	5	4.09	0.38879	1
GO:0036315	cellular response to sterol	11	5	4.09	0.38879	1
GO:0042026	protein refolding	11	5	4.09	0.38879	1
GO:0042402	cellular biogenic amine catabolic proces...	11	5	4.09	0.38879	1
GO:0045292	mRNA cis splicing, via spliceosome	11	5	4.09	0.38879	1
GO:0046189	phenol-containing compound biosynthetic ...	11	5	4.09	0.38879	1
GO:0046633	alpha-beta T cell proliferation	11	5	4.09	0.38879	1
GO:0050830	defense response to Gram-positive bacter...	11	5	4.09	0.38879	1
GO:0050891	multicellular organismal water homeostas...	11	5	4.09	0.38879	1
GO:0051180	vitamin transport	11	5	4.09	0.38879	1
GO:0051882	mitochondrial depolarization	11	5	4.09	0.38879	1
GO:0051900	regulation of mitochondrial depolarizati...	11	5	4.09	0.38879	1
GO:0060317	cardiac epithelial to mesenchymal transi...	11	5	4.09	0.38879	1
GO:0061298	retina vasculature development in camera...	11	5	4.09	0.38879	1
GO:0070193	synaptonemal complex organization	11	5	4.09	0.38879	1
GO:0070266	necroptotic process	11	5	4.09	0.38879	1
GO:0071480	cellular response to gamma radiation	11	5	4.09	0.38879	1
GO:0071709	membrane assembly	11	5	4.09	0.38879	1
GO:0071875	adrenergic receptor signaling pathway	11	5	4.09	0.38879	1
GO:0072350	tricarboxylic acid metabolic process	11	5	4.09	0.38879	1
GO:0072583	clathrin-mediated endocytosis	11	5	4.09	0.38879	1
GO:0097205	renal filtration	11	5	4.09	0.38879	1
GO:1990090	cellular response to nerve growth factor...	11	5	4.09	0.38879	1
GO:2000272	negative regulation of receptor activity	11	5	4.09	0.38879	1
GO:0060271	cilium morphogenesis	116	45	43.09	0.38941	1
GO:0006650	glycerophospholipid metabolic process	185	71	68.71	0.38964	1
GO:0044282	small molecule catabolic process	185	71	68.71	0.38964	1
GO:0009749	response to glucose	79	31	29.34	0.38991	1
GO:0070663	regulation of leukocyte proliferation	79	31	29.34	0.38991	1
GO:0022610	biological adhesion	620	234	230.28	0.38998	1
GO:0006164	purine nucleotide biosynthetic process	132	51	49.03	0.39208	1
GO:0009581	detection of external stimulus	87	34	32.31	0.39246	1
GO:0043542	endothelial cell migration	87	34	32.31	0.39246	1
GO:0055080	cation homeostasis	273	104	101.4	0.39292	1
GO:0033619	membrane protein proteolysis	37	15	13.74	0.39308	1
GO:0006665	sphingolipid metabolic process	95	37	35.29	0.39458	1
GO:0002444	myeloid leukocyte mediated immunity	24	10	8.91	0.39583	1
GO:0015682	ferric iron transport	24	10	8.91	0.39583	1
GO:0019229	regulation of vasoconstriction	24	10	8.91	0.39583	1
GO:0030101	natural killer cell activation	24	10	8.91	0.39583	1
GO:0033572	transferrin transport	24	10	8.91	0.39583	1
GO:0038032	termination of G-protein coupled recepto...	24	10	8.91	0.39583	1
GO:0050918	positive chemotaxis	24	10	8.91	0.39583	1
GO:0072512	trivalent inorganic cation transport	24	10	8.91	0.39583	1
GO:0000963	mitochondrial RNA processing	6	3	2.23	0.39658	1
GO:0001886	endothelial cell morphogenesis	6	3	2.23	0.39658	1
GO:0002003	angiotensin maturation	6	3	2.23	0.39658	1
GO:0002181	cytoplasmic translation	6	3	2.23	0.39658	1
GO:0002360	T cell lineage commitment	6	3	2.23	0.39658	1
GO:0002480	antigen processing and presentation of e...	6	3	2.23	0.39658	1
GO:0002643	regulation of tolerance induction	6	3	2.23	0.39658	1
GO:0002707	negative regulation of lymphocyte mediat...	6	3	2.23	0.39658	1
GO:0003093	regulation of glomerular filtration	6	3	2.23	0.39658	1
GO:0003272	endocardial cushion formation	6	3	2.23	0.39658	1
GO:0003337	mesenchymal to epithelial transition inv...	6	3	2.23	0.39658	1
GO:0006273	lagging strand elongation	6	3	2.23	0.39658	1
GO:0006534	cysteine metabolic process	6	3	2.23	0.39658	1
GO:0006569	tryptophan catabolic process	6	3	2.23	0.39658	1
GO:0006578	amino-acid betaine biosynthetic process	6	3	2.23	0.39658	1
GO:0006670	sphingosine metabolic process	6	3	2.23	0.39658	1
GO:0006707	cholesterol catabolic process	6	3	2.23	0.39658	1
GO:0006729	tetrahydrobiopterin biosynthetic process	6	3	2.23	0.39658	1
GO:0007144	female meiosis I	6	3	2.23	0.39658	1
GO:0007216	G-protein coupled glutamate receptor sig...	6	3	2.23	0.39658	1
GO:0007442	hindgut morphogenesis	6	3	2.23	0.39658	1
GO:0008216	spermidine metabolic process	6	3	2.23	0.39658	1
GO:0009133	nucleoside diphosphate biosynthetic proc...	6	3	2.23	0.39658	1
GO:0010452	histone H3-K36 methylation	6	3	2.23	0.39658	1
GO:0010603	regulation of cytoplasmic mRNA processin...	6	3	2.23	0.39658	1
GO:0010715	regulation of extracellular matrix disas...	6	3	2.23	0.39658	1
GO:0010744	positive regulation of macrophage derive...	6	3	2.23	0.39658	1
GO:0010801	negative regulation of peptidyl-threonin...	6	3	2.23	0.39658	1
GO:0014866	skeletal myofibril assembly	6	3	2.23	0.39658	1
GO:0015780	nucleotide-sugar transport	6	3	2.23	0.39658	1
GO:0015911	plasma membrane long-chain fatty acid tr...	6	3	2.23	0.39658	1
GO:0016127	sterol catabolic process	6	3	2.23	0.39658	1
GO:0017121	phospholipid scrambling	6	3	2.23	0.39658	1
GO:0018027	peptidyl-lysine dimethylation	6	3	2.23	0.39658	1
GO:0019388	galactose catabolic process	6	3	2.23	0.39658	1
GO:0019919	peptidyl-arginine methylation, to asymme...	6	3	2.23	0.39658	1
GO:0021984	adenohypophysis development	6	3	2.23	0.39658	1
GO:0022027	interkinetic nuclear migration	6	3	2.23	0.39658	1
GO:0030859	polarized epithelial cell differentiatio...	6	3	2.23	0.39658	1
GO:0031646	positive regulation of neurological syst...	6	3	2.23	0.39658	1
GO:0032049	cardiolipin biosynthetic process	6	3	2.23	0.39658	1
GO:0032703	negative regulation of interleukin-2 pro...	6	3	2.23	0.39658	1
GO:0032926	negative regulation of activin receptor ...	6	3	2.23	0.39658	1
GO:0033033	negative regulation of myeloid cell apop...	6	3	2.23	0.39658	1
GO:0033689	negative regulation of osteoblast prolif...	6	3	2.23	0.39658	1
GO:0034086	maintenance of sister chromatid cohesion	6	3	2.23	0.39658	1
GO:0034088	maintenance of mitotic sister chromatid ...	6	3	2.23	0.39658	1
GO:0034111	negative regulation of homotypic cell-ce...	6	3	2.23	0.39658	1
GO:0034311	diol metabolic process	6	3	2.23	0.39658	1
GO:0034982	mitochondrial protein processing	6	3	2.23	0.39658	1
GO:0035358	regulation of peroxisome proliferator ac...	6	3	2.23	0.39658	1
GO:0035929	steroid hormone secretion	6	3	2.23	0.39658	1
GO:0038180	nerve growth factor signaling pathway	6	3	2.23	0.39658	1
GO:0039531	regulation of viral-induced cytoplasmic ...	6	3	2.23	0.39658	1
GO:0039535	regulation of RIG-I signaling pathway	6	3	2.23	0.39658	1
GO:0042053	regulation of dopamine metabolic process	6	3	2.23	0.39658	1
GO:0042178	xenobiotic catabolic process	6	3	2.23	0.39658	1
GO:0042340	keratan sulfate catabolic process	6	3	2.23	0.39658	1
GO:0042364	water-soluble vitamin biosynthetic proce...	6	3	2.23	0.39658	1
GO:0042436	indole-containing compound catabolic pro...	6	3	2.23	0.39658	1
GO:0042438	melanin biosynthetic process	6	3	2.23	0.39658	1
GO:0042983	amyloid precursor protein biosynthetic p...	6	3	2.23	0.39658	1
GO:0042984	regulation of amyloid precursor protein ...	6	3	2.23	0.39658	1
GO:0043046	DNA methylation involved in gamete gener...	6	3	2.23	0.39658	1
GO:0043084	penile erection	6	3	2.23	0.39658	1
GO:0043249	erythrocyte maturation	6	3	2.23	0.39658	1
GO:0043371	negative regulation of CD4-positive, alp...	6	3	2.23	0.39658	1
GO:0043457	regulation of cellular respiration	6	3	2.23	0.39658	1
GO:0043628	ncRNA 3'-end processing	6	3	2.23	0.39658	1
GO:0044088	regulation of vacuole organization	6	3	2.23	0.39658	1
GO:0044320	cellular response to leptin stimulus	6	3	2.23	0.39658	1
GO:0045623	negative regulation of T-helper cell dif...	6	3	2.23	0.39658	1
GO:0045717	negative regulation of fatty acid biosyn...	6	3	2.23	0.39658	1
GO:0045723	positive regulation of fatty acid biosyn...	6	3	2.23	0.39658	1
GO:0046146	tetrahydrobiopterin metabolic process	6	3	2.23	0.39658	1
GO:0046218	indolalkylamine catabolic process	6	3	2.23	0.39658	1
GO:0046629	gamma-delta T cell activation	6	3	2.23	0.39658	1
GO:0046641	positive regulation of alpha-beta T cell...	6	3	2.23	0.39658	1
GO:0046851	negative regulation of bone remodeling	6	3	2.23	0.39658	1
GO:0048148	behavioral response to cocaine	6	3	2.23	0.39658	1
GO:0048318	axial mesoderm development	6	3	2.23	0.39658	1
GO:0048672	positive regulation of collateral sprout...	6	3	2.23	0.39658	1
GO:0050706	regulation of interleukin-1 beta secreti...	6	3	2.23	0.39658	1
GO:0050716	positive regulation of interleukin-1 sec...	6	3	2.23	0.39658	1
GO:0050718	positive regulation of interleukin-1 bet...	6	3	2.23	0.39658	1
GO:0051589	negative regulation of neurotransmitter ...	6	3	2.23	0.39658	1
GO:0051968	positive regulation of synaptic transmis...	6	3	2.23	0.39658	1
GO:0060242	contact inhibition	6	3	2.23	0.39658	1
GO:0060285	ciliary cell motility	6	3	2.23	0.39658	1
GO:0060340	positive regulation of type I interferon...	6	3	2.23	0.39658	1
GO:0060837	blood vessel endothelial cell differenti...	6	3	2.23	0.39658	1
GO:0061299	retina vasculature morphogenesis in came...	6	3	2.23	0.39658	1
GO:0061525	hindgut development	6	3	2.23	0.39658	1
GO:0070099	regulation of chemokine-mediated signali...	6	3	2.23	0.39658	1
GO:0071392	cellular response to estradiol stimulus	6	3	2.23	0.39658	1
GO:0072224	metanephric glomerulus development	6	3	2.23	0.39658	1
GO:0072283	metanephric renal vesicle morphogenesis	6	3	2.23	0.39658	1
GO:0072393	microtubule anchoring at microtubule org...	6	3	2.23	0.39658	1
GO:0090037	positive regulation of protein kinase C ...	6	3	2.23	0.39658	1
GO:0090051	negative regulation of cell migration in...	6	3	2.23	0.39658	1
GO:0097104	postsynaptic membrane assembly	6	3	2.23	0.39658	1
GO:1900745	positive regulation of p38MAPK cascade	6	3	2.23	0.39658	1
GO:1901623	regulation of lymphocyte chemotaxis	6	3	2.23	0.39658	1
GO:1901678	iron coordination entity transport	6	3	2.23	0.39658	1
GO:1902176	negative regulation of intrinsic apoptot...	6	3	2.23	0.39658	1
GO:2000051	negative regulation of non-canonical Wnt...	6	3	2.23	0.39658	1
GO:2000144	positive regulation of DNA-templated tra...	6	3	2.23	0.39658	1
GO:2000515	negative regulation of CD4-positive, alp...	6	3	2.23	0.39658	1
GO:2000696	regulation of epithelial cell differenti...	6	3	2.23	0.39658	1
GO:2001014	regulation of skeletal muscle cell diffe...	6	3	2.23	0.39658	1
GO:2001267	regulation of cysteine-type endopeptidas...	6	3	2.23	0.39658	1
GO:0051291	protein heterooligomerization	66	26	24.51	0.39668	1
GO:0071219	cellular response to molecule of bacteri...	66	26	24.51	0.39668	1
GO:0021537	telencephalon development	111	43	41.23	0.39785	1
GO:0015980	energy derivation by oxidation of organi...	252	96	93.6	0.39892	1
GO:0006900	membrane budding	45	18	16.71	0.39933	1
GO:0072655	establishment of protein localization to...	74	29	27.49	0.39958	1
GO:0030162	regulation of proteolysis	135	52	50.14	0.40111	1
GO:0000086	G2/M transition of mitotic cell cycle	151	58	56.08	0.40255	1
GO:0044839	cell cycle G2/M phase transition	151	58	56.08	0.40255	1
GO:0070613	regulation of protein processing	159	61	59.06	0.40311	1
GO:0019882	antigen processing and presentation	167	64	62.03	0.40359	1
GO:0008645	hexose transport	90	35	33.43	0.40382	1
GO:0015758	glucose transport	90	35	33.43	0.40382	1
GO:0071478	cellular response to radiation	90	35	33.43	0.40382	1
GO:0032321	positive regulation of Rho GTPase activi...	53	21	19.69	0.40386	1
GO:0032355	response to estradiol	53	21	19.69	0.40386	1
GO:0023061	signal release	215	82	79.86	0.40512	1
GO:0033762	response to glucagon	32	13	11.89	0.40532	1
GO:0034109	homotypic cell-cell adhesion	32	13	11.89	0.40532	1
GO:0045069	regulation of viral genome replication	32	13	11.89	0.40532	1
GO:0097530	granulocyte migration	32	13	11.89	0.40532	1
GO:0010647	positive regulation of cell communicatio...	691	260	256.65	0.40696	1
GO:0017157	regulation of exocytosis	61	24	22.66	0.40726	1
GO:0040029	regulation of gene expression, epigeneti...	114	44	42.34	0.40774	1
GO:0010761	fibroblast migration	19	8	7.06	0.40928	1
GO:0010771	negative regulation of cell morphogenesi...	19	8	7.06	0.40928	1
GO:0014047	glutamate secretion	19	8	7.06	0.40928	1
GO:0022409	positive regulation of cell-cell adhesio...	19	8	7.06	0.40928	1
GO:0032007	negative regulation of TOR signaling	19	8	7.06	0.40928	1
GO:0046427	positive regulation of JAK-STAT cascade	19	8	7.06	0.40928	1
GO:0046850	regulation of bone remodeling	19	8	7.06	0.40928	1
GO:0048260	positive regulation of receptor-mediated...	19	8	7.06	0.40928	1
GO:0055081	anion homeostasis	19	8	7.06	0.40928	1
GO:0060330	regulation of response to interferon-gam...	19	8	7.06	0.40928	1
GO:0090004	positive regulation of establishment of ...	19	8	7.06	0.40928	1
GO:1901655	cellular response to ketone	19	8	7.06	0.40928	1
GO:1902743	regulation of lamellipodium organization	19	8	7.06	0.40928	1
GO:0001935	endothelial cell proliferation	69	27	25.63	0.40988	1
GO:0071103	DNA conformation change	146	56	54.23	0.41048	1
GO:0071774	response to fibroblast growth factor	146	56	54.23	0.41048	1
GO:0042180	cellular ketone metabolic process	154	59	57.2	0.41090	1
GO:0002040	sprouting angiogenesis	40	16	14.86	0.41142	1
GO:0006906	vesicle fusion	40	16	14.86	0.41142	1
GO:0032272	negative regulation of protein polymeriz...	40	16	14.86	0.41142	1
GO:0051084	'de novo' posttranslational protein fold...	40	16	14.86	0.41142	1
GO:0038127	ERBB signaling pathway	170	65	63.14	0.41149	1
GO:0030031	cell projection assembly	210	80	78	0.41203	1
GO:0048585	negative regulation of response to stimu...	662	249	245.88	0.41252	1
GO:0048869	cellular developmental process	2020	755	750.27	0.41298	1
GO:0007610	behavior	357	135	132.6	0.41431	1
GO:0007268	synaptic transmission	440	166	163.43	0.41560	1
GO:0048747	muscle fiber development	48	19	17.83	0.41562	1
GO:0051591	response to cAMP	48	19	17.83	0.41562	1
GO:0071326	cellular response to monosaccharide stim...	48	19	17.83	0.41562	1
GO:0071331	cellular response to hexose stimulus	48	19	17.83	0.41562	1
GO:0019226	transmission of nerve impulse	101	39	37.51	0.41591	1
GO:0046328	regulation of JNK cascade	101	39	37.51	0.41591	1
GO:0071417	cellular response to organonitrogen comp...	293	111	108.83	0.41679	1
GO:0008610	lipid biosynthetic process	400	151	148.57	0.41761	1
GO:0001932	regulation of protein phosphorylation	633	238	235.11	0.41828	1
GO:0043407	negative regulation of MAP kinase activi...	56	22	20.8	0.41865	1
GO:0070374	positive regulation of ERK1 and ERK2 cas...	56	22	20.8	0.41865	1
GO:2000736	regulation of stem cell differentiation	56	22	20.8	0.41865	1
GO:0071396	cellular response to lipid	149	57	55.34	0.41894	1
GO:0007257	activation of JUN kinase activity	27	11	10.03	0.41912	1
GO:0021766	hippocampus development	27	11	10.03	0.41912	1
GO:0032648	regulation of interferon-beta production	27	11	10.03	0.41912	1
GO:0032881	regulation of polysaccharide metabolic p...	27	11	10.03	0.41912	1
GO:0071695	anatomical structure maturation	27	11	10.03	0.41912	1
GO:0002684	positive regulation of immune system pro...	368	139	136.68	0.41920	1
GO:0007399	nervous system development	1293	484	480.25	0.41965	1
GO:0044085	cellular component biogenesis	1433	536	532.25	0.42300	1
GO:0046649	lymphocyte activation	280	106	104	0.42336	1
GO:0010951	negative regulation of endopeptidase act...	80	31	29.71	0.42387	1
GO:0010717	regulation of epithelial to mesenchymal ...	35	14	13	0.42485	1
GO:0002279	mast cell activation involved in immune ...	14	6	5.2	0.42515	1
GO:0006956	complement activation	14	6	5.2	0.42515	1
GO:0007190	activation of adenylate cyclase activity	14	6	5.2	0.42515	1
GO:0010226	response to lithium ion	14	6	5.2	0.42515	1
GO:0010712	regulation of collagen metabolic process	14	6	5.2	0.42515	1
[truncated: 3,821 more rows]
