# Supplementary material for: A panel of induced pluripotent stem cells from chimpanzees: a resource for comparative functional genomics
Source: eLife journal article supplement (doi:10.7554/elife.07103), 2015-06-23
Supplement: supp [file elife-07103-supp-v1.zip › elife_poa_e07103_Supplementary_File_6.txt]

chr	DMR.start	DMR.end	n.probes	Probes.in.DMR	Probe.gene.position	Probe.type	HGNC.gene	Refseq.gene	DMR.type
1	884817	885276	2	cg19923810,cg16993975	TSS1500;TSS1500,TSS1500;TSS1500	Island,Island	KLHL17;NOC2L,KLHL17;NOC2L	NM_198317;NM_015658,NM_198317;NM_015658	hypo.chimp
1	954360	954369	2	cg25774148,cg17021880	Body,Body	Island,Island	AGRN,AGRN	NM_198576,NM_198576	hypo.chimp
1	1040073	1040442	2	cg27302190,cg18025136	5UTR,5UTR	N_Shore,Island	C1orf159,C1orf159	NM_017891,NM_017891	hypo.chimp
1	1218968	1219214	2	cg06818047,cg03003335	Body,Body	Island,Island	ACAP3,ACAP3	NM_030649,NM_030649	hyper.chimp
1	1234903	1234939	2	cg05397202,cg23931819	Body,Body	Island,Island	PUSL1,PUSL1	NM_153339,NM_153339	hypo.chimp
1	1278449	1278789	2	cg11414742,cg15472728	3UTR,3UTR	N_Shore,N_Shore	MXRA8,MXRA8	NM_032348,NM_032348	hypo.chimp
1	1287065	1287439	4	cg21165029,cg03400623,cg22109675,cg15492552	_,_	_,_	_,_	_,_	hyper.chimp
1	1323641	1323899	2	cg24837149,cg16278124	Body;Body;Body;TSS1500;Body,Body;Body;Body;TSS1500;Body	N_Shore,N_Shore	CCNL2;CCNL2;CCNL2;LOC148413;CCNL2,CCNL2;CCNL2;CCNL2;LOC148413;CCNL2	NM_030937;NM_001144868;NM_001144867;NR_015434;NM_001039577,NM_030937;NM_001144868;NM_001144867;NR_015434;NM_001039577	hypo.chimp
1	1359329	1360638	8	cg21837069,cg06444575,cg00702126,cg14667273,cg27391934,cg08589721,cg14271665,cg02896318	TSS1500;TSS1500,TSS1500;TSS1500,TSS1500;TSS1500,TSS1500;TSS1500,TSS1500;TSS1500,TSS200;TSS200,TSS200;TSS200,TSS200;TSS200	N_Shore,N_Shore,N_Shore,N_Shore,N_Shore,N_Shore,Island,Island	VWA1;VWA1,VWA1;VWA1,VWA1;VWA1,VWA1;VWA1,VWA1;VWA1,VWA1;VWA1,VWA1;VWA1,VWA1;VWA1	NM_199121;NM_022834,NM_199121;NM_022834,NM_199121;NM_022834,NM_199121;NM_022834,NM_199121;NM_022834,NM_199121;NM_022834,NM_199121;NM_022834,NM_199121;NM_022834	hyper.chimp
1	1554285	1554288	2	cg00078456,cg18852096	Body;Body;Body;Body;Body;Body,Body;Body;Body;Body;Body;Body	Island,Island	MIB2;MIB2;MIB2;MIB2;MIB2;MIB2,MIB2;MIB2;MIB2;MIB2;MIB2;MIB2	NM_001170687;NM_001170688;NM_080875;NM_001170689;NM_001170686;NR_033183,NM_001170687;NM_001170688;NM_080875;NM_001170689;NM_001170686;NR_033183	hyper.chimp
1	1701045	1701881	2	cg02280859,cg23678594	TSS1500,_	S_Shore,N_Shore	NADK,_	NM_023018,_	hypo.chimp
1	1865640	1865663	2	cg17747265,cg03396347	_,_	Island,Island	_,_	_,_	hypo.chimp
1	2013017	2013118	2	cg16735509,cg02587648	Body;5UTR,Body;5UTR	N_Shelf,N_Shore	PRKCZ;PRKCZ,PRKCZ;PRKCZ	NM_002744;NM_001033581,NM_002744;NM_001033581	hyper.chimp
1	2110899	2111309	3	cg26227225,cg05337761,cg08200543	Body;Body;3UTR,Body;Body;Body,Body;Body;Body	Island,Island,Island	C1orf86;LOC100128003;C1orf86,C1orf86;LOC100128003;C1orf86,C1orf86;LOC100128003;C1orf86	NM_001146310;NR_024445;NM_182533,NM_001146310;NR_024445;NM_182533,NM_001146310;NR_024445;NM_182533
1	3218935	3220469	7	cg16546658,cg10893986,cg09845604,cg15605124,cg16394551,cg15491247,cg17435683	Body;Body,Body;Body,Body;Body,Body;Body,Body;Body,Body;Body,Body;Body	_,_	PRDM16;PRDM16,PRDM16;PRDM16,PRDM16;PRDM16,PRDM16;PRDM16,PRDM16;PRDM16,PRDM16;PRDM16,PRDM16;PRDM16	NM_022114;NM_199454,NM_022114;NM_199454,NM_022114;NM_199454,NM_022114;NM_199454,NM_022114;NM_199454,NM_022114;NM_199454,NM_022114;NM_199454
1	3259112	3259338	2	cg27187555,cg01101873	Body;Body,Body;Body	_,_	PRDM16;PRDM16,PRDM16;PRDM16	NM_022114;NM_199454,NM_022114;NM_199454
1	3298146	3298428	3	cg00087546,cg10956857,cg10573643	Body;Body,Body;Body,Body;Body	N_Shore,N_Shore,N_Shore	PRDM16;PRDM16,PRDM16;PRDM16,PRDM16;PRDM16	NM_022114;NM_199454,NM_022114;NM_199454,NM_022114;NM_199454
1	3299724	3299963	2	cg20671649,cg26846424	Body;Body,Body;Body	N_Shore,Island	PRDM16;PRDM16,PRDM16;PRDM16	NM_022114;NM_199454,NM_022114;NM_199454
1	3639110	3639831	6	cg25196575,cg02924487,cg17804348,cg07178825,cg17986341,cg24845675	Body;Body;3UTR;Body,Body;Body;3UTR;3UTR,Body;Body;3UTR;3UTR,Body;Body;3UTR;3UTR,3UTR;3UTR;3UTR;3UTR,3UTR;3UTR;3UTR;3UTR	N_Shore,Island,Island,Island,S_Shore,S_Shore	TP73;TP73;TP73;TP73,TP73;TP73;TP73;TP73,TP73;TP73;TP73;TP73,TP73;TP73;TP73;TP73,TP73;TP73;TP73;TP73,TP73;TP73;TP73;TP73	NM_001126240;NM_005427;NM_001126242;NM_001126241,NM_001126240;NM_005427;NM_001126242;NM_001126241,NM_001126240;NM_005427;NM_001126242;NM_001126241,NM_001126240;NM_005427;NM_001126242;NM_001126241,NM_001126240;NM_001126242;NM_005427;NM_001126241,NM_001126240;NM_001126242;NM_005427;NM_001126241	hyper.chimp
1	2372634	2373547	2	cg06753057,cg00157179	_,_	_,N_Shelf	_,_	_,_	hypo.chimp
1	2456956	2456960	2	cg06415891,cg20816361	_,_	Island,Island	_,_	_,_	hypo.chimp
1	2826451	2826503	2	cg04979216,cg02394247	_,_	_,_	_,_	_,_	hypo.chimp
1	2927859	2928106	3	cg04716261,cg18123385,cg14365123	TSS200,1stExon;5UTR,1stExon;5UTR	N_Shore,N_Shore,N_Shore	ACTRT2,ACTRT2;ACTRT2,ACTRT2;ACTRT2	NM_080431,NM_080431;NM_080431,NM_080431;NM_080431	hypo.chimp
1	3200185	3200284	2	cg10328768,cg24298696	Body;Body,Body;Body	_,_	PRDM16;PRDM16,PRDM16;PRDM16	NM_022114;NM_199454,NM_022114;NM_199454	hypo.chimp
1	3556810	3557023	5	cg22822803,cg11256802,cg04865841,cg18021902,cg22614891	TSS1500,TSS1500,TSS1500,TSS1500,TSS1500	Island,Island,Island,Island,Island	WDR8,WDR8,WDR8,WDR8,WDR8	NM_017818,NM_017818,NM_017818,NM_017818,NM_017818	hypo.chimp
1	6092575	6092704	3	cg07173934,cg09667775,cg00252804	Body,Body,Body	_,_	CHD5,CHD5,CHD5	NM_015557,NM_015557,NM_015557	hypo.chimp
1	6110473	6110707	3	cg25143235,cg15205435,cg12135344	Body,Body,Body	Island,Island,Island	CHD5,CHD5,CHD5	NM_015557,NM_015557,NM_015557	hyper.chimp
1	6188389	6188481	3	cg03716999,cg24870568,cg17515966	TSS1500,TSS1500,TSS1500	N_Shore,N_Shore,Island	RNF207,RNF207,RNF207	NM_207396,NM_207396,NM_207396	hyper.chimp
1	6376865	6376926	2	cg10967178,cg09273516	TSS1500,TSS1500	S_Shore,S_Shore	ACOT7,ACOT7	NM_007274,NM_007274	hyper.chimp
1	6683966	6684717	2	cg02904365,cg26460931	Body,TSS200	Island,Island	DNAJC11,DNAJC11	NM_018198,NM_018198	hyper.chimp
1	7767322	7767824	4	cg12258811,cg14204433,cg25514503,cg24454741	TSS200,5UTR;1stExon,Body,Body	Island,Island,Island,S_Shore	PER3,PER3;PER3,PER3,PER3	NM_016831,NM_016831;NM_016831,NM_016831,NM_016831
1	7835654	7835668	2	cg21419617,cg10500283	1stExon;Body;5UTR,1stExon;Body;5UTR	_,_	UTS2;UTS2;UTS2,UTS2;UTS2;UTS2	NM_006786;NM_021995;NM_006786,NM_006786;NM_021995;NM_006786
1	8380004	8380345	2	cg05045335,cg20316440	5UTR;Body;Body,5UTR;Body;Body	_,_	RERE;RERE;RERE,RERE;RERE;RERE	NM_001042682;NM_012102;NM_001042681,NM_001042682;NM_012102;NM_001042681
1	8927548	8927642	2	cg24052039,cg13207702	TSS1500,TSS1500	_,_	CA6,CA6	NM_001215,NM_001215
1	9477700	9478278	2	cg08808724,cg13935689	_,_	N_Shore,S_Shore	_,_	_,_
1	9521570	9522261	2	cg13557160,cg07775117	TSS1500,5UTR;1stExon	N_Shore,Island	SLC25A33,SLC25A33;SLC25A33	NM_032315,NM_032315;NM_032315	hypo.chimp
1	9303343	9303387	2	cg06349050,cg19820919	5UTR,5UTR	_,_	SPSB1,SPSB1	NM_025106,NM_025106	hyper.chimp
1	9925306	9925415	2	cg23990535,cg26370409	TSS1500;1stExon;5UTR,TSS1500;TSS200	N_Shore,N_Shore	NMNAT1;LZIC;LZIC,NMNAT1;LZIC	NM_022787;NM_032368;NM_032368,NM_022787;NM_032368
1	9979424	9979440	3	cg10796749,cg14202757,cg20413202	TSS1500,TSS1500,TSS1500	N_Shore,N_Shore,N_Shore	RBP7,RBP7,RBP7	NM_052960,NM_052960,NM_052960
1	10381727	10381733	2	cg05704155,cg25312481	5UTR;1stExon,5UTR;1stExon	Island,Island	PGD;PGD,PGD;PGD	NM_002631;NM_002631,NM_002631;NM_002631
1	10620900	10621381	2	cg20704560,cg02396224	3UTR,3UTR	Island,Island	CASZ1,CASZ1	NM_001079843,NM_001079843
1	10631772	10634282	9	cg16346321,cg18878351,cg19706390,cg09415955,cg22508928,cg19370715,cg27170141,cg10816626,cg15597109	Body;Body,Body;Body,Body;Body,Body;Body,Body;Body,Body;Body,Body;Body,Body;Body,Body;Body	S_Shore,S_Shore,S_Shore,S_Shore,S_Shore,N_Shelf,N_Shelf,N_Shelf,N_Shelf	CASZ1;CASZ1,CASZ1;CASZ1,CASZ1;CASZ1,CASZ1;CASZ1,CASZ1;CASZ1,CASZ1;CASZ1,CASZ1;CASZ1,CASZ1;CASZ1,CASZ1;CASZ1	NM_017766;NM_001079843,NM_017766;NM_001079843,NM_017766;NM_001079843,NM_017766;NM_001079843,NM_017766;NM_001079843,NM_017766;NM_001079843,NM_017766;NM_001079843,NM_017766;NM_001079843,NM_017766;NM_001079843
1	11035563	11035667	2	cg18947360,cg14853169	_,_	_,_	_,_	_,_
1	11663095	11663252	2	cg24718367,cg17189494	Body;Body,5UTR;5UTR	N_Shore,N_Shore	MAD2L2;MAD2L2,MAD2L2;MAD2L2	NM_006341;NM_001127325,NM_001127325;NM_006341
1	15445637	15446044	2	cg13234882,cg00524963	TSS1500,TSS1500	N_Shore,N_Shore	FHAD1,FHAD1	NM_052929,NM_052929
1	15802368	15802973	5	cg13390004,cg24675056,cg01769457,cg15036616,cg19699088	_,_	N_Shore,Island,Island,Island,S_Shore	_,_	_,_
1	16220571	16220582	2	cg11528029,cg16591681	TSS1500;TSS1500,TSS1500;TSS1500	_,_	CLCNKA;CLCNKA,CLCNKA;CLCNKA	NM_004070;NM_001042704,NM_004070;NM_001042704
1	16247355	16247991	3	cg06219995,cg15558527,cg10324630	TSS1500;Body,TSS1500;Body,Body;1stExon;5UTR	_,_	CLCNKB;CLCNKB,CLCNKB;CLCNKB,CLCNKB;CLCNKB;CLCNKB	NM_001165945;NM_000085,NM_001165945;NM_000085,NM_000085;NM_001165945;NM_001165945	hyper.chimp
1	10411875	10412630	2	cg06925060,cg05038881	TSS1500;TSS1500,TSS200;TSS1500;TSS200	N_Shore,N_Shore	APITD1;APITD1,APITD1;APITD1;APITD1	NM_199294;NM_198544,NM_198544;NM_199295;NM_199294	hypo.chimp
1	10711388	10711515	2	cg10234511,cg18437144	5UTR;5UTR,5UTR;5UTR	_,_	CASZ1;CASZ1,CASZ1;CASZ1	NM_001079843;NM_017766,NM_001079843;NM_017766	hypo.chimp
1	11962299	11962301	2	cg09820729,cg18184769	TSS1500;TSS1500,TSS1500;TSS1500	N_Shore,N_Shore	MFN2;MFN2,MFN2;MFN2	NM_014874;NM_001127660,NM_014874;NM_001127660	hypo.chimp
1	12150287	12150514	3	cg26189983,cg00155063,cg09557991	Body,Body,Body	Island,S_Shore,S_Shore	TNFRSF1B,TNFRSF1B,TNFRSF1B	NM_001066,NM_001066,NM_001066	hypo.chimp
1	12489769	12489783	2	cg00057791,cg09686497	Body;TSS200;Body;TSS200,Body;TSS200;Body;TSS200	_,_	VPS13D;SNORA59A;VPS13D;SNORA59B,VPS13D;SNORA59A;VPS13D;SNORA59B	NM_015378;NR_003025;NM_018156;NR_003022,NM_015378;NR_003025;NM_018156;NR_003022	hypo.chimp
1	13781748	13782408	4	cg23954416,cg16590190,cg00831909,cg25286482	TSS1500;TSS1500,TSS1500;TSS1500,TSS1500;TSS1500,TSS1500;TSS1500	N_Shore,N_Shore,Island,Island	PDPN;PDPN,PDPN;PDPN,PDPN;PDPN,PDPN;PDPN	NM_006474;NM_198389,NM_006474;NM_198389,NM_006474;NM_198389,NM_006474;NM_198389	hypo.chimp
1	16551975	16552367	3	cg10623389,cg03978675,cg03586820	TSS1500,TSS1500,TSS1500	S_Shore,S_Shore,S_Shore	FBXO42,FBXO42,FBXO42	NM_018994,NM_018994,NM_018994	hypo.chimp
1	16683257	16683264	2	cg07021523,cg09883381	Body,Body	Island,Island	CROCCL2,CROCCL2	NR_023386,NR_023386	hypo.chimp
1	16830844	16831051	2	cg18895859,cg22732055	TSS1500,TSS1500	_,_	CROCCL1,CROCCL1	NR_026752,NR_026752	hyper.chimp
1	18279211	18279399	3	cg20697066,cg21291759,cg01727764	_,_	_,_	_,_	_,_	hypo.chimp
1	18983509	18983565	2	cg19637330,cg26220594	_,_	Island,S_Shore	_,_	_,_	hyper.chimp
1	19473041	19473656	9	cg15948567,cg20677058,cg13935437,cg18202521,cg12798157,cg11376198,cg09045262,cg18151012,cg09990584	1stExon;1stExon,1stExon;1stExon,TSS200;TSS200,TSS200;TSS200,TSS200;TSS200,TSS200;TSS200,TSS1500;TSS1500,TSS1500;TSS1500,TSS1500;TSS1500	Island,Island,Island,Island,Island,Island,Island,Island,S_Shore	AKR7L;AKR7L,AKR7L;AKR7L,AKR7L;AKR7L,AKR7L;AKR7L,AKR7L;AKR7L,AKR7L;AKR7L,AKR7L;AKR7L,AKR7L;AKR7L,AKR7L;AKR7L	NM_201252;NM_001145289,NM_201252;NM_001145289,NM_001145289;NM_201252,NM_001145289;NM_201252,NM_001145289;NM_201252,NM_001145289;NM_201252,NM_201252;NM_001145289,NM_201252;NM_001145289,NM_201252;NM_001145289	hypo.chimp
1	19487667	19488289	5	cg09028008,cg00690710,cg02910873,cg20253350,cg11233384	1stExon,TSS200,TSS1500,TSS1500,TSS1500	Island,Island,Island,Island,S_Shore	AKR7A3,AKR7A3,AKR7A3,AKR7A3,AKR7A3	NM_012067,NM_012067,NM_012067,NM_012067,NM_012067	hypo.chimp
1	19538033	19538344	3	cg15676500,cg10970798,cg25141181	3UTR,3UTR,3UTR	S_Shore,S_Shore,S_Shore	CAPZB,CAPZB,CAPZB	NM_004930,NM_004930,NM_004930
1	20861177	20861190	2	cg08911391,cg24876897	TSS1500,TSS1500	S_Shore,S_Shore	DDOST,DDOST	NM_005216,NM_005216
1	22792524	22792756	3	cg15597364,cg05266226,cg05269784	Body,Body,Body	Island,Island,Island	EPHA8,EPHA8,EPHA8	NM_020526,NM_020526,NM_020526
1	23152653	23153064	3	cg01647314,cg17974166,cg24444923	_,_	Island,Island,Island	_,_	_,_
1	24101819	24102269	4	cg19276111,cg26404511,cg03611151,cg07967717	5UTR,5UTR,5UTR,5UTR	Island,S_Shore,S_Shore,S_Shore	CNR2,CNR2,CNR2,CNR2	NM_001841,NM_001841,NM_001841,NM_001841
1	25815047	25816025	2	cg04631202,cg26890920	TSS1500,TSS1500	N_Shore,N_Shore	MAN1C1,MAN1C1	NM_020379,NM_020379
1	26419646	26419821	2	cg21300267,cg20616108	_,_	_,_	_,_	_,_
1	26608461	26608741	3	cg09799571,cg06368558,cg26616083	TSS1500,TSS1500,TSS1500	N_Shore,N_Shore,N_Shore	LIN28,LIN28,LIN28	NM_024674,NM_024674,NM_024674
1	26609834	26609849	2	cg14011486,cg18634211	TSS200,TSS200	Island,Island	LIN28,LIN28	NM_024674,NM_024674
1	27159869	27160055	2	cg19125999,cg16574155	TSS1500,TSS1500	S_Shore,S_Shore	C1orf172,C1orf172	NM_152365,NM_152365
1	27540912	27541197	4	cg06745704,cg04608356,cg02576092,cg21604615	TSS200,TSS200,1stExon;5UTR,1stExon;5UTR	_,_	SYTL1,SYTL1,SYTL1;SYTL1,SYTL1;SYTL1	NM_032872,NM_032872,NM_032872;NM_032872,NM_032872;NM_032872
1	27814453	27814773	3	cg22124648,cg13184177,cg23167456	Body;Body;Body,Body;Body;Body,Body;Body;Body	Island,Island,Island	FGR;FGR;FGR,FGR;FGR;FGR,FGR;FGR;FGR	NM_001042729;NM_001042747;NM_005248,NM_001042729;NM_001042747;NM_005248,NM_001042729;NM_001042747;NM_005248
1	27924289	27924358	2	cg18936052,cg02905426	TSS1500;TSS1500;TSS1500;TSS1500;TSS1500,TSS1500;TSS1500;TSS1500;TSS1500;TSS1500	N_Shore,N_Shore	FAM76A;FAM76A;FAM76A;FAM76A;FAM76A,FAM76A;FAM76A;FAM76A;FAM76A;FAM76A	NM_152660;NM_001143913;NM_001143915;NM_001143914;NM_001143912,NM_152660;NM_001143913;NM_001143915;NM_001143914;NM_001143912
1	28527953	28528734	9	cg09024430,cg25371560,cg07574385,cg19364137,cg00972603,cg12630974,cg04889884,cg25716286,cg13577188	TSS200;TSS200,TSS200;TSS200,TSS200;TSS200,TSS200;TSS200,TSS200;TSS200,5UTR;1stExon;1stExon;5UTR,5UTR;1stExon;1stExon;5UTR,5UTR;1stExon;5UTR,5UTR;5UTR	Island,Island,Island,Island,Island,Island,Island,Island,S_Shore	MED18;MED18,MED18;MED18,MED18;MED18,MED18;MED18,MED18;MED18,MED18;MED18;MED18;MED18,MED18;MED18;MED18;MED18,MED18;MED18;MED18,MED18;MED18	NM_001127350;NM_017638,NM_001127350;NM_017638,NM_001127350;NM_017638,NM_001127350;NM_017638,NM_001127350;NM_017638,NM_017638;NM_001127350;NM_017638;NM_001127350,NM_017638;NM_001127350;NM_017638;NM_001127350,NM_017638;NM_017638;NM_001127350,NM_017638;NM_001127350
1	28974436	28974539	2	cg22861340,cg00151709	_,_	Island,Island	_,_	_,_
1	29085693	29086264	4	cg21870545,cg25727366,cg25287272,cg13487185	TSS1500;TSS1500;TSS1500;TSS1500;TSS1500,TSS1500;TSS1500;TSS1500;TSS1500;TSS1500,TSS1500;TSS1500;TSS1500;TSS1500;TSS1500,1stExon;5UTR;5UTR;1stExon;5UTR;5UTR;5UTR;1stExon;1stExon;1stExon	N_Shore,N_Shore,N_Shore,Island	EPB41;EPB41;EPB41;EPB41;EPB41,EPB41;EPB41;EPB41;EPB41;EPB41,EPB41;EPB41;EPB41;EPB41;EPB41,EPB41;EPB41;EPB41;EPB41;EPB41;EPB41;EPB41;EPB41;EPB41;EPB41	NM_001166007;NM_203343;NM_203342;NM_001166005;NM_004437,NM_001166007;NM_203343;NM_203342;NM_001166005;NM_004437,NM_001166007;NM_203343;NM_203342;NM_001166005;NM_004437,NM_203343;NM_001166007;NM_001166005;NM_004437;NM_203343;NM_203342;NM_004437;NM_001166007;NM_203342;NM_001166005	hyper.chimp
1	20015293	20015804	2	cg15505276,cg16021223	TSS1500,TSS1500	_,_	RNF186,RNF186	NM_019062,NM_019062	hypo.chimp
1	20605067	20605141	2	cg05773309,cg26309074	_,_	_,_	_,_	_,_	hypo.chimp
1	22100740	22101169	2	cg00359395,cg24332002	Body,Body	_,_	HSPG2,HSPG2	NM_005529,NM_005529	hypo.chimp
1	23569000	23569884	3	cg15598244,cg16240683,cg16696234	3UTR;Body;TSS200;1stExon,3UTR;Body;1stExon;TSS1500,3UTR;Body;1stExon;TSS1500	S_Shore,S_Shore,S_Shore	C1orf213;C1orf213;ZNF436;C1orf213,C1orf213;C1orf213;C1orf213;ZNF436,C1orf213;C1orf213;C1orf213;ZNF436	NM_138479;NM_001008896;NM_001077195;NM_138479,NM_138479;NM_001008896;NM_138479;NM_001077195,NM_138479;NM_001008896;NM_138479;NM_001077195
1	24311194	24311365	3	cg14564939,cg06548416,cg20254361	1stExon;5UTR,TSS200,TSS200	_,_	MYOM3;MYOM3,MYOM3,MYOM3	NM_152372;NM_152372,NM_152372,NM_152372	hypo.chimp
1	24734191	24734506	4	cg20146241,cg18128887,cg01519464,cg26692749	Body,Body,3UTR,3UTR	N_Shore,Island,Island,Island	RCAN3,RCAN3,RCAN3,RCAN3	NM_013441,NM_013441,NM_013441,NM_013441	hypo.chimp
1	24840769	24840939	2	cg09895325,cg09874213	TSS1500,TSS1500	N_Shore,N_Shore	SRRM1,SRRM1	NM_005839,NM_005839	hypo.chimp
1	26105991	26106296	7	cg11709544,cg09796501,cg26314868,cg20685674,cg19362196,cg23323671,cg08134856	TSS1500;TSS1500;TSS1500;TSS200,TSS1500;TSS1500;TSS1500;TSS200,TSS1500;TSS1500;TSS1500;TSS200,TSS1500;TSS1500;TSS1500;TSS200,TSS1500;TSS1500;TSS1500;TSS1500,TSS1500;TSS1500;TSS1500;TSS1500,TSS1500;TSS1500;TSS1500;TSS1500	Island,Island,Island,Island,Island,Island,S_Shore	STMN1;STMN1;STMN1;STMN1,STMN1;STMN1;STMN1;STMN1,STMN1;STMN1;STMN1;STMN1,STMN1;STMN1;STMN1;STMN1,STMN1;STMN1;STMN1;STMN1,STMN1;STMN1;STMN1;STMN1,STMN1;STMN1;STMN1;STMN1	NM_005563;NM_203401;NM_001145454;NM_203399,NM_005563;NM_203401;NM_001145454;NM_203399,NM_005563;NM_203401;NM_001145454;NM_203399,NM_005563;NM_203401;NM_001145454;NM_203399,NM_005563;NM_203399;NM_203401;NM_001145454,NM_005563;NM_203399;NM_203401;NM_001145454,NM_005563;NM_203399;NM_203401;NM_001145454	hypo.chimp
1	26516821	26517102	3	cg08572767,cg00813993,cg16068833	TSS200;5UTR,5UTR;1stExon;5UTR,5UTR;1stExon	_,_	CD52;UBXN11,UBXN11;CD52;CD52,UBXN11;CD52	NM_001803;NM_145345,NM_145345;NM_001803;NM_001803,NM_145345;NM_001803	hypo.chimp
1	26968754	26968979	2	ch.1.893309F,cg24544309	Body;Body,Body;Body	_,_	ARID1A;ARID1A,ARID1A;ARID1A	NM_006015;NM_139135,NM_006015;NM_139135	hypo.chimp
1	27687312	27688284	2	cg15936990,cg26601722	5UTR,5UTR	N_Shore,N_Shore	WASF2,WASF2	NM_006990,NM_006990	hypo.chimp
1	27766473	27766512	2	cg00594099,cg17110920	5UTR,5UTR	N_Shore,N_Shore	AHDC1,AHDC1	NM_001029882,NM_001029882	hypo.chimp
1	27834333	27834455	3	cg16922167,cg13448978,cg21115433	TSS200,TSS200,TSS200	Island,Island,S_Shore	FGR,FGR,FGR	NM_005248,NM_005248,NM_005248	hypo.chimp
1	28029586	28029598	2	cg08857906,cg15707455	TSS1500;TSS1500;TSS1500,TSS1500;TSS1500;TSS1500	N_Shore,N_Shore	PPP1R8;PPP1R8;PPP1R8,PPP1R8;PPP1R8;PPP1R8	NM_014110;NM_002713;NM_138558,NM_014110;NM_002713;NM_138558	hypo.chimp
1	28114164	28114268	2	cg25410668,cg00292669	TSS1500,TSS1500	S_Shore,S_Shore	RPA2,RPA2	NM_002946,NM_002946	hypo.chimp
1	29011021	29012345	3	cg11413657,cg02785792,cg06779961	TSS1500,Body,Body	N_Shore,Island,S_Shore	OPRD1,OPRD1,OPRD1	NM_000911,NM_000911,NM_000911	hypo.chimp
1	29429603	29430407	2	cg00035847,cg12802086	Body;5UTR,TSS1500;TSS1500	N_Shore,S_Shore	MECR;MECR,MECR;MECR	NM_016011;NM_001024732,NM_001024732;NM_016011
1	29677487	29677638	2	cg24930749,cg02221471	_,_	N_Shore,Island	_,_	_,_
1	30969183	30969805	2	cg26721382,cg18084114	TSS200,TSS1500	S_Shelf,S_Shelf	MATN1,MATN1	NM_002379,NM_002379
1	31827047	31827423	3	cg24253618,cg12905085,cg10574365	_,_	Island,Island,Island	_,_	_,_
1	31943516	31943637	2	cg04852949,cg09255732	TSS1500,TSS1500	S_Shore,S_Shore	COL16A1,COL16A1	NM_001856,NM_001856
1	32010510	32011318	4	cg04878000,cg03774520,cg10505580,cg08160462	_,_	Island,Island,Island,S_Shore	_,_	_,_
1	32529881	32529954	2	cg24468890,cg15713729	TSS1500,TSS1500	N_Shore,N_Shore	HDAC1,HDAC1	NM_004964,NM_004964
1	33863251	33863345	3	cg24728456,cg06901094,cg24005949	Body,Body,Body	Island,Island,Island	CSMD2,CSMD2,CSMD2	NM_052896,NM_052896,NM_052896
1	35812453	35812472	2	cg17474422,cg05845757	Body,Body	Island,Island	TFAP2E,TFAP2E	NM_178548,NM_178548
1	35815020	35815025	2	cg07196426,cg19163067	Body,Body	Island,Island	TFAP2E,TFAP2E	NM_178548,NM_178548
1	35879847	35880812	3	cg11254582,cg12413579,cg21680327	TSS200,TSS1500,TSS1500	Island,S_Shore,S_Shore	PSMB2,PSMB2,PSMB2	NM_002794,NM_002794,NM_002794
1	36169486	36169590	2	cg06765909,cg03397389	1stExon;1stExon;5UTR;5UTR,1stExon;1stExon;5UTR;5UTR	Island,Island	EIF2C3;EIF2C3;EIF2C3;EIF2C3,EIF2C3;EIF2C3;EIF2C3;EIF2C3	NM_177422;NM_024852;NM_177422;NM_024852,NM_177422;NM_024852;NM_177422;NM_024852
1	36338359	36338443	2	cg18931815,cg19046959	1stExon,TSS200	_,_	COL8A2,COL8A2	NM_005202,NM_005202
1	36829356	36829552	2	cg08903855,cg18769374	_,_	_,_	_,_	_,_
1	37493513	37493544	2	cg10105794,cg17465112	_,_	_,_	_,_	_,_
1	37795173	37795305	4	cg21488617,cg21171625,cg14830003,cg16109423	1stExon,1stExon,1stExon,Body	Island,Island,Island,Island	DNALI1,DNALI1,DNALI1,DNALI1	NM_003462,NM_003462,NM_003462,NM_003462
1	38002831	38004812	11	cg12158389,cg12128017,cg18537001,cg21306240,cg06163371,cg00667938,cg21439231,cg26653529,cg01796781,cg00013409,cg10122079	Body;Body,1stExon;5UTR;1stExon;5UTR,TSS200;TSS200,TSS200;TSS200,TSS200;TSS200,TSS1500;TSS1500,TSS1500;TSS1500,TSS1500;TSS1500,TSS1500;TSS1500,TSS1500;TSS1500,TSS1500;TSS1500	Island,Island,Island,Island,Island,S_Shore,S_Shore,S_Shore,S_Shore,S_Shore,S_Shore	EPHA10;EPHA10,EPHA10;EPHA10;EPHA10;EPHA10,EPHA10;EPHA10,EPHA10;EPHA10,EPHA10;EPHA10,EPHA10;EPHA10,EPHA10;EPHA10,EPHA10;EPHA10,EPHA10;EPHA10,EPHA10;EPHA10,EPHA10;EPHA10	NM_173641;NM_001099439,NM_173641;NM_173641;NM_001099439;NM_001099439,NM_001099439;NM_173641,NM_001099439;NM_173641,NM_001099439;NM_173641,NM_001099439;NM_173641,NM_001099439;NM_173641,NM_001099439;NM_173641,NM_001099439;NM_173641,NM_001099439;NM_173641,NM_001099439;NM_173641
1	39041988	39042124	2	cg16992161,cg06556218	_,_	N_Shore,N_Shore	_,_	_,_
1	39112270	39112869	2	cg10557460,cg24051749	TSS1500,TSS1500;Body	S_Shore,S_Shore	MYCBP,MYCBP;GJA9	NM_012333,NM_012333;NM_030772
1	39179974	39180154	2	cg25314315,cg08209422	1stExon;5UTR,TSS200	_,_	RHBDL2;RHBDL2,RHBDL2	NM_017821;NM_017821,NM_017821	hyper.chimp
1	31426942	31427596	5	cg11958060,cg25010788,cg19731891,cg08847173,cg18232347	3UTR,3UTR,Body,Body,Body	N_Shore,Island,Island,Island,S_Shore	NKAIN1,NKAIN1,NKAIN1,NKAIN1,NKAIN1	NM_024522,NM_024522,NM_024522,NM_024522,NM_024522	hypo.chimp
1	31658242	31658328	2	cg17296818,cg26421646	TSS1500,TSS1500	N_Shore,N_Shore	SERINC2,SERINC2	NM_178865,NM_178865	hypo.chimp
1	32600692	32600778	2	cg22045990,cg10249224	1stExon;5UTR;TSS1500,1stExon;5UTR;TSS1500	S_Shore,S_Shore	TSSK3;TSSK3;LOC100128071,TSSK3;TSSK3;LOC100128071	NM_052841;NM_052841;NM_001167676,NM_052841;NM_052841;NM_001167676	hypo.chimp
1	33365728	33365741	2	cg03549856,cg17671608	_,_	Island,Island	_,_	_,_	hypo.chimp
1	33421235	33421321	3	cg25274008,cg25342005,cg15575967	TSS1500,TSS1500,TSS1500	S_Shore,S_Shore,S_Shore	TRIM62,TRIM62,TRIM62	NM_018207,NM_018207,NM_018207	hypo.chimp
1	33514531	33514956	4	cg02972475,cg00007036,cg17422088,cg18238718	Body,Body,Body,Body	Island,Island,Island,Island	ZNF362,ZNF362,ZNF362,ZNF362	NM_152493,NM_152493,NM_152493,NM_152493	hypo.chimp
1	35359175	35359236	2	cg07105947,cg14615266	_,_	Island,S_Shore	_,_	_,_	hypo.chimp
1	36120803	36120865	2	cg01928574,cg27094188	TSS1500,TSS1500	N_Shore,N_Shore	EIF2C1,EIF2C1	NM_012199,NM_012199	hypo.chimp
1	36688291	36688427	2	cg12809031,cg27439456	Body;Body,Body;Body	N_Shore,Island	OSCP1;OSCP1,OSCP1;OSCP1	NM_206837;NM_145047,NM_206837;NM_145047	hypo.chimp
1	37929049	37929526	5	cg24088508,cg12339802,cg27170260,cg06917450,cg22449745	TSS1500,TSS1500,TSS1500,TSS1500,TSS1500;TSS1500	N_Shore,N_Shore,N_Shore,N_Shore,N_Shore	C1orf109,C1orf109,C1orf109,C1orf109,CDCA8;C1orf109	NM_017850,NM_017850,NM_017850,NM_017850,NM_018101;NM_017850	hypo.chimp
1	38233537	38234127	2	cg05202204,cg09847153	_,_	N_Shore,N_Shore	_,_	_,_	hypo.chimp
1	38660012	38660732	2	ch.1.38660012F,ch.1.1224902R	_,_	_,_	_,_	_,_	hypo.chimp
1	39021902	39022020	3	cg11391637,cg18150908,cg26113488	_,_	_,_	_,_	_,_	hypo.chimp
1	39054474	39054590	2	cg13202591,cg19224645	_,_	N_Shore,N_Shore	_,_	_,_	hypo.chimp
1	39798348	39798469	2	cg15110848,cg09165041	TSS1500,TSS1500	_,_	LOC728448,LOC728448	NR_003929,NR_003929	hypo.chimp
1	39909676	39909772	2	cg21280510,cg10052561	Body,Body	Island,Island	NT5C1A,NT5C1A	NM_032526,NM_032526	hypo.chimp
1	39921968	39922019	2	cg25375186,cg13896192	Body,Body	N_Shore,Island	HPCAL4,HPCAL4	NM_016257,NM_016257	hypo.chimp
1	39977823	39977853	2	cg12051614,cg00546153	5UTR;Body;Body,5UTR;Body;Body	S_Shore,S_Shore	PPIE;PPIE;PPIE,PPIE;PPIE;PPIE	NM_203457;NM_006112;NM_203456,NM_203457;NM_006112;NM_203456	hypo.chimp
1	40192886	40193124	2	cg01869896,cg23962483	TSS1500;TSS1500,TSS1500;TSS1500	N_Shore,Island	MFSD2A;MFSD2A,MFSD2A;MFSD2A	NM_032793;NM_001136493,NM_032793;NM_001136493	hypo.chimp
1	40200923	40201810	2	cg01058711,ch.1.1268752F	Body;Body,Body;Body	_,_	MFSD2A;MFSD2A,MFSD2A;MFSD2A	NM_001136493;NM_032793,NM_001136493;NM_032793	hypo.chimp
1	40715212	40715233	2	cg22024760,cg14198472	TSS1500,TSS1500	N_Shore,N_Shore	ZNF642,ZNF642	NM_198494,NM_198494	hyper.chimp
1	40904557	40904609	2	cg24006654,cg08394377	TSS1500,TSS1500	S_Shore,S_Shore	RIMS3,RIMS3	NM_014747,NM_014747	hyper.chimp
1	40929317	40929378	2	cg15986668,cg26783428	TSS1500;TSS1500;TSS1500;Body;TSS1500;TSS1500,TSS1500;TSS1500;TSS1500;Body;TSS1500;TSS1500	N_Shore,N_Shore	NFYC;NFYC;NFYC;LOC100130557;NFYC;NFYC,NFYC;NFYC;NFYC;LOC100130557;NFYC;NFYC	NM_001142587;NM_001142589;NM_001142588;NR_024567;NM_014223;NM_001142590,NM_001142587;NM_001142589;NM_001142588;NR_024567;NM_014223;NM_001142590	hyper.chimp
1	41259995	41260024	2	cg22435441,cg22005565	1stExon;5UTR;TSS200,TSS200;TSS200	S_Shelf,S_Shelf	SLFNL1;SLFNL1;SLFNL1,SLFNL1;SLFNL1	NM_144990;NM_144990;NM_001168247,NM_001168247;NM_144990
1	42156897	42157747	6	cg23762517,cg25607920,cg26038582,cg03884592,cg15937073,cg17098103	1stExon;1stExon;5UTR;5UTR,1stExon;1stExon;5UTR;5UTR,1stExon;1stExon;5UTR;5UTR,1stExon;1stExon;5UTR;5UTR,TSS200;TSS200,TSS1500;TSS1500	S_Shore,S_Shore,S_Shore,S_Shore,S_Shore,S_Shore	HIVEP3;HIVEP3;HIVEP3;HIVEP3,HIVEP3;HIVEP3;HIVEP3;HIVEP3,HIVEP3;HIVEP3;HIVEP3;HIVEP3,HIVEP3;HIVEP3;HIVEP3;HIVEP3,HIVEP3;HIVEP3,HIVEP3;HIVEP3	NM_001127714;NM_024503;NM_024503;NM_001127714,NM_001127714;NM_024503;NM_024503;NM_001127714,NM_001127714;NM_024503;NM_024503;NM_001127714,NM_001127714;NM_024503;NM_024503;NM_001127714,NM_001127714;NM_024503,NM_024503;NM_001127714
1	43306500	43306784	3	cg14207654,cg18153322,cg14780649	_,_	Island,Island,Island	_,_	_,_
1	43524084	43524091	2	cg24464789,cg02990330	TSS1500;TSS1500,TSS1500;TSS1500	_,_	C1orf210;C1orf210,C1orf210;C1orf210	NM_001164829;NM_182517,NM_001164829;NM_182517
1	44174020	44175109	4	cg23212751,cg23954153,cg13606994,cg12908607	TSS1500;Body;Body;Body;Body,Body;Body;Body;Body;Body,Body;Body;Body;Body;Body,3UTR;3UTR;3UTR;3UTR;3UTR	N_Shore,Island,Island,S_Shore	ARTN;ARTN;ARTN;ARTN;ARTN,ARTN;ARTN;ARTN;ARTN;ARTN,ARTN;ARTN;ARTN;ARTN;ARTN,ARTN;ARTN;ARTN;ARTN;ARTN	NM_057160;NM_057091;NM_003976;NM_057090;NM_001136215,NM_057091;NM_003976;NM_057160;NM_057090;NM_001136215,NM_057091;NM_003976;NM_057160;NM_057090;NM_001136215,NM_057160;NM_001136215;NM_003976;NM_057090;NM_057091	hyper.chimp
1	43022890	43023660	4	cg08979126,cg13781744,cg24634568,cg27232866	_,_	N_Shore,N_Shore,Island,Island	_,_	_,_	hypo.chimp
1	43069078	43069113	2	cg25285237,cg12410370	Body;Body,Body;Body	_,_	ERMAP;ERMAP,ERMAP;ERMAP	NM_001017922;NM_018538,NM_001017922;NM_018538	hypo.chimp
1	43244960	43245684	2	cg09476154,cg03343013	_,_	N_Shore,Island	_,_	_,_	hypo.chimp
1	43770881	43771607	2	cg21268658,cg00007221	5UTR;5UTR,5UTR;5UTR	S_Shore,S_Shore	PTPRF;PTPRF,PTPRF;PTPRF	NM_002840;NM_130440,NM_002840;NM_130440	hypo.chimp
1	43804343	43804413	2	cg22875872,cg10881128	Body;Body,Body;Body	Island,Island	PTPRF;PTPRF,PTPRF;PTPRF	NM_002840;NM_130440,NM_002840;NM_130440	hypo.chimp
1	44255883	44256210	2	cg06807641,cg00718029	Body;TSS1500;TSS1500,Body;TSS1500;TSS1500	_,_	SLC6A9;SLC6A9;SLC6A9,SLC6A9;SLC6A9;SLC6A9	NM_001024845;NM_006934;NM_201649,NM_001024845;NM_006934;NM_201649	hypo.chimp
1	44499530	44499824	3	cg14210311,cg04486940,cg16681083	Body,Body,Body	_,_	ERI3,ERI3,ERI3	NM_024066,NM_024066,NM_024066	hypo.chimp
1	44593750	44594061	3	cg04166874,cg02674114,cg21534299	TSS1500,TSS1500,TSS1500	S_Shore,S_Shore,S_Shore	ERI3,ERI3,ERI3	NM_024066,NM_024066,NM_024066	hypo.chimp
1	44855492	44855865	3	cg00150520,cg20944964,cg26098401	Body,Body,Body	Island,Island,Island	RNF220,RNF220,RNF220	NM_018150,NM_018150,NM_018150	hypo.chimp
1	45081966	45082012	2	cg27433934,cg07905537	TSS1500;TSS1500,TSS1500;TSS1500	S_Shore,S_Shore	PTCH2;PTCH2,PTCH2;PTCH2	NM_001166292;NM_003738,NM_001166292;NM_003738	hypo.chimp
1	45565619	45566831	3	cg13951491,cg16593917,cg07708653	1stExon,1stExon,1stExon;3UTR	Island,Island,S_Shore	HPDL,HPDL,HPDL;HPDL	NM_032756,NM_032756,NM_032756;NM_032756
1	45988363	45988466	2	cg17156633,cg09580965	5UTR;5UTR,5UTR;5UTR	N_Shore,N_Shore	IPP;IPP,IPP;IPP	NM_005897;NM_001145349,NM_005897;NM_001145349
1	46404950	46405740	6	cg05322273,cg15711727,cg14796305,cg00041872,cg14709691,cg06974930	_,_	N_Shore,N_Shore,N_Shore,Island,Island,S_Shore	_,_	_,_
1	46632361	46632378	3	cg12671744,cg18261491,cg16267850	TSS200,TSS200,TSS200	Island,Island,Island	FAAH,FAAH,FAAH	NM_001441,NM_001441,NM_001441
1	48225052	48225327	3	cg18376692,cg24090990,cg07202054	_,_	S_Shelf,S_Shelf,S_Shelf	_,_	_,_
1	50286232	50287047	2	cg10989897,cg00322486	TSS200,Body	Island,S_Shore	ELAVL4,ELAVL4	NM_001144777,NM_001144777
1	52271090	52271267	2	cg00691240,cg08855861	Body;1stExon,Body;1stExon	Island,Island	TXNDC12;KTI12,TXNDC12;KTI12	NM_015913;NM_138417,NM_015913;NM_138417
1	53477086	53477566	4	cg04916289,cg26112661,cg18153869,cg13094926	TSS1500,TSS1500,TSS1500,TSS1500	Island,Island,Island,S_Shore	MAGOH,MAGOH,MAGOH,MAGOH	NM_002370,NM_002370,NM_002370,NM_002370
1	55123411	55124247	2	cg20291423,cg27168858	Body,Body	N_Shore,N_Shore	DHCR24,DHCR24	NM_014762,NM_014762
1	62501845	62501982	2	cg07949011,cg11084571	Body,Body	_,_	KANK4,KANK4	NM_181712,NM_181712
1	63556565	63557591	3	cg11923320,cg17941572,cg00597687	_,_	Island,Island,Island	_,_	_,_
1	67545560	67545574	2	cg11132246,cg19745415	TSS200,TSS200	N_Shore,N_Shore	IL12RB2,IL12RB2	NM_001559,NM_001559
1	68072081	68072099	2	cg25189904,cg26764244	TSS1500,TSS1500	S_Shore,S_Shore	GNG12,GNG12	NM_018841,NM_018841
1	71284688	71285073	2	cg06937997,cg23823908	Body;Body;Body;Body;Body;Body;Body;Body;Body;Body,1stExon;Body;1stExon;Body;1stExon;1stExon;Body;1stExon;1stExon;1stExon	N_Shore,Island	PTGER3;PTGER3;PTGER3;PTGER3;PTGER3;PTGER3;PTGER3;PTGER3;PTGER3;PTGER3,PTGER3;PTGER3;PTGER3;PTGER3;PTGER3;PTGER3;PTGER3;PTGER3;PTGER3;PTGER3	NR_028294;NM_198715;NM_198717;NM_198714;NR_028293;NM_198718;NR_028292;NM_001126044;NM_198719;NM_198716,NM_198718;NR_028294;NM_198714;NR_028293;NM_198716;NM_198717;NR_028292;NM_001126044;NM_198719;NM_198715
1	76034890	76035572	8	cg16427752,cg02161115,cg21438018,cg14200364,cg22035229,cg17028301,cg23237611,cg08909961	TSS1500,TSS1500,TSS200,TSS200,1stExon;5UTR,1stExon,1stExon,Body	N_Shore,N_Shore,Island,Island,Island,Island,Island,S_Shore	MSH4,MSH4,MSH4,MSH4,MSH4;MSH4,MSH4,MSH4,MSH4	NM_002440,NM_002440,NM_002440,NM_002440,NM_002440;NM_002440,NM_002440,NM_002440,NM_002440	hypo.chimp
1	46578612	46578742	3	cg08259313,cg10215817,cg02459555	TSS1500,TSS1500,TSS1500	N_Shore,N_Shore,N_Shore	NSUN4,NSUN4,NSUN4	NM_199044,NM_199044,NM_199044	hyper.chimp
1	47428448	47428590	2	cg09258479,cg06619077	TSS200,TSS1500	_,_	PDZK1IP1,PDZK1IP1	NM_005764,NM_005764	hyper.chimp
1	50652147	50652737	2	cg07584563,cg26682922	_,_	N_Shore,N_Shore	_,_	_,_	hyper.chimp
1	51661363	51661549	2	cg12526849,cg24701772	TSS1500;Body,TSS1500;Body	_,_	EPS15;EPS15,EPS15;EPS15	NM_001159969;NM_001981,NM_001159969;NM_001981	hyper.chimp
1	53159791	53160110	2	cg09128567,cg17185953	Body,TSS200	Island,Island	ECHDC2,ECHDC2	NM_018281,NM_018281	hyper.chimp
1	53301559	53301579	2	cg16899892,cg01568973	Body,Body	Island,S_Shore	PODN,PODN	NM_153703,NM_153703	hyper.chimp
1	54786297	54786748	3	cg10266490,cg21448423,cg01802772	TSS200;TSS200,1stExon;5UTR;1stExon;5UTR,Body;Body	_,_	ACOT11;ACOT11,ACOT11;ACOT11;ACOT11;ACOT11,ACOT11;ACOT11	NM_147161;NM_015547,NM_015547;NM_015547;NM_147161;NM_147161,NM_015547;NM_147161	hyper.chimp
1	54953298	54953942	2	cg25284512,cg26433140	TSS1500,TSS200	N_Shore,Island	TTC4,TTC4	NM_004623,NM_004623	hyper.chimp
1	55003295	55003358	2	cg08168431,cg11084629	TSS1500,TSS1500	S_Shore,S_Shore	PARS2,PARS2	NM_152268,NM_152268	hyper.chimp
1	63312793	63312805	2	cg12806613,cg15672853	_,_	_,_	_,_	_,_	hyper.chimp
1	63555014	63555755	2	cg05719140,cg00097228	_,_	Island,Island	_,_	_,_	hyper.chimp
1	65240585	65240605	2	cg15208832,cg00600454	_,_	N_Shore,N_Shore	_,_	_,_	hyper.chimp
1	65385438	65385453	2	cg10380652,cg23013958	TSS1500;TSS1500;TSS1500,TSS1500;TSS1500;TSS1500	N_Shore,N_Shore	AK3L1;AK3L1;AK3L1,AK3L1;AK3L1;AK3L1	NM_013410;NM_203464;NM_001005353,NM_013410;NM_203464;NM_001005353	hyper.chimp
1	66030320	66030610	3	cg08716655,cg04704294,cg16294013	TSS1500;TSS1500,TSS1500;TSS1500,TSS200;TSS1500	N_Shore,N_Shore,N_Shore	PDE4B;PDE4B,PDE4B;PDE4B,PDE4B;PDE4B	NM_002600;NM_001037341,NM_002600;NM_001037341,NM_001037341;NM_002600	hyper.chimp
1	66990261	66990863	2	cg17819635,cg24161501	TSS1500,5UTR	N_Shore,Island	TCTEX1D1,TCTEX1D1	NM_152665,NM_152665
1	67922781	67922988	3	cg23723105,cg02639608,cg01810953	TSS1500,TSS1500,TSS1500	N_Shore,N_Shore,N_Shore	GADD45A,GADD45A,GADD45A	NM_001924,NM_001924,NM_001924
1	70944611	70945074	3	cg10239860,cg19601666,cg20457732	_,_	_,_	_,_	_,_
1	74436268	74436748	5	cg06034096,cg00402366,cg21446242,cg27438756,cg03837750	1stExon;5UTR;TSS1500;TSS1500,1stExon;TSS200;TSS200;5UTR,1stExon;TSS200;TSS200;5UTR,TSS200;TSS200;TSS200,TSS1500;Body;Body	N_Shore,N_Shore,Island,Island,S_Shore	LRRIQ3;LRRIQ3;TNNI3K;FPGT,LRRIQ3;TNNI3K;FPGT;LRRIQ3,LRRIQ3;TNNI3K;FPGT;LRRIQ3,TNNI3K;FPGT;LRRIQ3,LRRIQ3;TNNI3K;FPGT	NM_001105659;NM_001105659;NM_001112808;NM_003838,NM_001105659;NM_001112808;NM_003838;NM_001105659,NM_001105659;NM_001112808;NM_003838;NM_001105659,NM_001112808;NM_003838;NM_001105659,NM_001105659;NM_001112808;NM_003838	hyper.chimp
1	74912169	74912877	2	cg27268184,cg09365529	TSS200,TSS1500	_,_	C1orf173,C1orf173	NM_001002912,NM_001002912	hyper.chimp
1	75366184	75367119	7	cg21009965,cg01971160,cg11196437,cg01185626,cg09222749,cg10249828,cg20594809	TSS1500,TSS1500,TSS1500,TSS200,TSS200,1stExon;5UTR,5UTR	N_Shelf,N_Shelf,N_Shore,N_Shore,N_Shore,N_Shore,N_Shore	LHX8,LHX8,LHX8,LHX8,LHX8,LHX8;LHX8,LHX8	NM_001001933,NM_001001933,NM_001001933,NM_001001933,NM_001001933,NM_001001933;NM_001001933,NM_001001933	hyper.chimp
1	76024224	76024564	2	cg21812670,cg09458394	TSS1500;TSS1500,TSS1500;Body	_,_	SNORD45C;RABGGTB,SNORD45C;RABGGTB	NR_003042;NM_004582,NR_003042;NM_004582	hyper.chimp
1	76026033	76026276	2	cg07774299,cg08702915	Body;TSS200,Body;TSS1500	_,_	RABGGTB;SNORD45A,RABGGTB;SNORD45B	NM_004582;NR_002749,NM_004582;NR_002748	hyper.chimp
1	78283728	78283823	2	cg26263401,cg20785560	TSS1500,TSS1500	N_Shore,N_Shore	GIPC2,GIPC2	NM_017655,NM_017655	hypo.chimp
1	84098773	84099355	9	cg03681926,cg07908237,cg14790630,cg08882038,cg07807165,cg02531516,cg18116902,cg26347197,cg24955204	_,_	N_Shore,N_Shore,Island,Island,Island,Island,Island,Island,Island	_,_	_,_	hyper.chimp
1	84992718	84992830	2	cg20267580,cg09062462	_,_	Island,Island	_,_	_,_	hypo.chimp
1	85496916	85497042	2	cg09385306,cg17737388	Body;Body,Body;Body	N_Shore,N_Shore	C1orf52;C1orf52,C1orf52;C1orf52	NR_024113;NM_198077,NR_024113;NM_198077	hypo.chimp
1	86633735	86633789	2	cg06898830,cg20280835	5UTR;5UTR,5UTR;5UTR	N_Shore,N_Shore	ODF2L;ODF2L,ODF2L;ODF2L	NM_020729;NM_001007022,NM_020729;NM_001007022	hyper.chimp
1	87389730	87389916	3	cg02357336,cg17711365,cg09121047	Body,Body,Body	N_Shore,Island,Island	LOC339524,LOC339524,LOC339524	NR_026989,NR_026989,NR_026989	hyper.chimp
1	89232092	89232117	2	cg14669130,cg11309454	TSS1500;TSS1500;TSS1500;TSS1500,TSS1500;TSS1500;TSS1500;TSS1500	S_Shore,S_Shore	CCBL2;CCBL2;RBMXL1;RBMXL1,CCBL2;CCBL2;RBMXL1;RBMXL1	NM_001008661;NM_001008662;NM_001162536;NM_019610,NM_001008661;NM_001008662;NM_001162536;NM_019610	hyper.chimp
1	90081208	90082193	2	cg24353213,cg01860897	5UTR;5UTR,5UTR;5UTR	N_Shore,Island	LRRC8D;LRRC8D,LRRC8D;LRRC8D	NM_018103;NM_001134479,NM_018103;NM_001134479	hypo.chimp
1	91072819	91074550	11	cg17443359,cg20387429,cg18486235,cg04929703,cg00667862,cg09793883,cg00644823,cg06849504,cg00503383,cg18235734,cg17799946	_,_	N_Shore,N_Shore,N_Shore,N_Shore,N_Shore,N_Shore,Island,Island,Island,Island,S_Shore	_,_	_,_	hyper.chimp
1	91079551	91079665	2	cg16137250,cg10521153	_,_	_,_	_,_	_,_	hyper.chimp
1	92123018	92123156	2	cg17074704,cg26542412	5UTR,5UTR	N_Shore,N_Shore	TGFBR3,TGFBR3	NM_003243,NM_003243	hypo.chimp
1	93023772	93023806	3	cg24312719,cg17140307,cg11226183	Body,Body,Body	S_Shore,S_Shore,S_Shore	EVI5,EVI5,EVI5	NM_005665,NM_005665,NM_005665	hypo.chimp
1	94475686	94476766	3	cg26229607,cg20335213,cg01812146	1stExon;5UTR,TSS1500,TSS1500	Island,S_Shore,S_Shore	ARHGAP29;ARHGAP29,ARHGAP29,ARHGAP29	NM_004815;NM_004815,NM_004815,NM_004815
1	95471415	95472860	7	cg01206378,cg20701556,cg24808901,cg03123541,cg06440946,cg25877054,cg26879578	TSS1500;TSS1500,TSS1500;TSS1500,TSS1500;TSS1500,TSS1500;TSS1500,TSS1500;TSS1500,Body;Body,Body;Body	N_Shore,N_Shore,N_Shore,N_Shore,N_Shore,Island,S_Shore	RWDD3;RWDD3,RWDD3;RWDD3,RWDD3;RWDD3,RWDD3;RWDD3,RWDD3;RWDD3,RWDD3;RWDD3,RWDD3;RWDD3	NM_001128142;NM_015485,NM_001128142;NM_015485,NM_001128142;NM_015485,NM_001128142;NM_015485,NM_001128142;NM_015485,NM_001128142;NM_015485,NM_001128142;NM_015485
1	98282770	98282916	2	cg02658730,cg25372296	_,_	N_Shore,N_Shore	_,_	_,_
1	99241911	99242165	2	cg20318156,cg26034531	Body;Body,Body;Body	N_Shore,N_Shore	LPPR5;LPPR5,LPPR5;LPPR5	NM_001010861;NM_001037317,NM_001010861;NM_001037317
1	99884315	99884437	2	cg07960762,cg24603803	1stExon;5UTR,1stExon;5UTR	_,_	PALMD;PALMD,PALMD;PALMD	NM_017734;NM_017734,NM_017734;NM_017734
1	100275163	100275777	2	cg11347139,cg10820988	TSS1500,TSS1500	N_Shore,N_Shore	HIAT1,HIAT1	NM_033055,NM_033055
1	110474292	110474435	2	cg27432826,cg25207248	_,_	N_Shore,Island	_,_	_,_
1	110752231	110752781	4	cg12702097,cg20982476,cg00410422,cg17164863	TSS200,TSS1500,TSS1500,TSS1500	S_Shore,S_Shore,S_Shore,S_Shore	HBXIP,HBXIP,HBXIP,HBXIP	NM_006402,NM_006402,NM_006402,NM_006402
1	113063011	113063287	3	cg26044038,cg10839663,cg23746359	_,TSS1500;TSS1500	Island,Island,Island	_,FAM19A3;FAM19A3	_,NM_001004440;NM_182759
1	113087920	113088694	5	cg11685510,cg13060157,cg22865470,cg12549600,cg04746890	_,_	Island,Island,Island,Island,Island	_,_	_,_
1	114323298	114323967	2	cg22020227,cg26824174	TSS1500,Body	_,_	OLFML3,OLFML3	NM_020190,NM_020190
1	114498321	114499845	10	cg22646710,cg15976388,cg19901801,cg19874857,cg12804010,cg12097117,cg06620092,cg00764109,cg26426632,cg12728020	TSS1500,TSS1500,TSS1500,TSS1500,TSS1500,TSS1500,TSS1500,TSS1500,TSS1500,_	N_Shore,Island,Island,Island,Island,S_Shore,S_Shore,S_Shore,S_Shore,S_Shore	SYT6,SYT6,SYT6,SYT6,SYT6,SYT6,SYT6,SYT6,SYT6,_	NM_205848,NM_205848,NM_205848,NM_205848,NM_205848,NM_205848,NM_205848,NM_205848,NM_205848,_
1	115199139	115199596	3	cg27332337,cg10440578,cg18396987	1stExon;5UTR,5UTR,5UTR	Island,Island,S_Shore	SYCP1;SYCP1,SYCP1,SYCP1	NM_003176;NM_003176,NM_003176,NM_003176	hyper.chimp
1	94778910	94779127	3	cg07387634,cg12599850,cg06881898	Body,Body,Body	N_Shore,N_Shore,N_Shore	F3,F3,F3	NM_001993,NM_001993,NM_001993	hypo.chimp
1	95057840	95057937	2	cg15571882,cg20817062	TSS1500;TSS1500,TSS1500;TSS1500	N_Shore,N_Shore	SLC44A3;SLC44A3,SLC44A3;SLC44A3	NM_001114106;NM_152369,NM_001114106;NM_152369	hypo.chimp
1	109090572	109090589	2	cg09117878,cg27538385	TSS1500,TSS1500	Island,Island	STXBP3,STXBP3	NM_007269,NM_007269	hypo.chimp
1	109999763	110000649	2	cg21451998,cg22247664	TSS1500;TSS1500;TSS1500,Body;Body;Body	N_Shore,Island	GSTM4;GSTM4;GSTM4,GSTM4;GSTM4;GSTM4	NM_147148;NM_000850;NR_024538,NR_024538;NM_147148;NM_000850	hypo.chimp
1	110553570	110553830	3	cg20966270,cg02193146,cg21217540	_,_	N_Shore,Island,Island	_,_	_,_	hypo.chimp
1	111571188	111571797	2	cg25211348,cg26366091	TSS1500;TSS1500,TSS200;TSS200	_,_	CHI3L2;CHI3L2,CHI3L2;CHI3L2	NM_001025197;NM_004000,NM_001025197;NM_004000	hypo.chimp
1	113194140	113194702	3	cg21883115,cg13966710,cg16256615	_,_	Island,Island,S_Shore	_,_	_,_	hypo.chimp
1	113300672	113301852	3	cg00963079,cg09226792,cg07176692	TSS200;TSS1500,TSS1500;TSS1500,TSS1500	Island,S_Shore,S_Shore	SLC16A1;SLC16A1,SLC16A1;SLC16A1,SLC16A1	NM_003051;NM_001166496,NM_003051;NM_001166496,NM_003051	hypo.chimp
1	114433195	114433485	2	cg02305412,cg06789517	_,3UTR	_,_	_,SYT6	_,NM_205848
1	115823448	115823614	2	cg07790079,cg03324464	_,_	_,_	_,_	_,_
1	116184507	116185157	3	cg17873750,cg23202177,cg02030187	5UTR;1stExon;5UTR,5UTR;1stExon;5UTR,1stExon;TSS1500;5UTR	S_Shore,S_Shore,S_Shore	NHLH2;NHLH2;NHLH2,NHLH2;NHLH2;NHLH2,NHLH2;NHLH2;NHLH2	NM_001111061;NM_001111061;NM_005599,NM_001111061;NM_001111061;NM_005599,NM_005599;NM_001111061;NM_005599	hypo.chimp
1	116914139	116914377	3	cg26313955,cg09584521,cg21039631	Body;Body;Body,Body;Body;Body,Body;Body;Body	N_Shore,N_Shore,N_Shore	CD58;CD58;CD58,CD58;CD58;CD58,CD58;CD58;CD58	NM_001779;NR_026665;NM_001144822,NM_001779;NR_026665;NM_001144822,NM_001779;NR_026665;NM_001144822	hypo.chimp
1	120240448	120240559	3	cg23131777,cg22774211,cg16166968	1stExon,1stExon;5UTR,1stExon;5UTR	N_Shore,Island,Island	ADAM30,ADAM30;ADAM30,ADAM30;ADAM30	NM_021794,NM_021794;NM_021794,NM_021794;NM_021794	hyper.chimp
1	120706686	120706845	3	cg22123542,cg25137968,cg04080517	TSS1500,TSS1500,TSS1500	N_Shore,N_Shore,N_Shore	HIST2H2BA,HIST2H2BA,HIST2H2BA	NR_027337,NR_027337,NR_027337	hypo.chimp
1	143304698	143305464	4	cg22122572,cg26160235,cg03603114,cg09127406	_,_	Island,Island,Island,Island	_,_	_,_	hyper.chimp
1	144219010	144219619	3	cg00986445,cg05660005,cg13131501	1stExon;5UTR,1stExon;5UTR,Body	Island,Island,S_Shore	RBM8A;RBM8A,RBM8A;RBM8A,RBM8A	NM_005105;NM_005105,NM_005105;NM_005105,NM_005105	hypo.chimp
1	144425367	144425500	3	cg06095777,cg11743829,cg25221984	5UTR,5UTR,5UTR	Island,Island,Island	CD160,CD160,CD160	NM_007053,NM_007053,NM_007053
1	145712109	145712250	3	cg08307963,cg17941330,cg26191449	TSS200,TSS200,TSS200	_,_	GJA5,GJA5,GJA5	NM_005266,NM_005266,NM_005266
1	146219447	146219516	3	cg02909688,cg05959459,cg19250989	_,_	N_Shore,Island,Island	_,_	_,_
1	146256104	146257282	5	cg17149103,cg00171578,cg10537450,cg25200152,cg06804778	_,_	N_Shore,Island,Island,S_Shore,S_Shore	_,_	_,_
1	146272796	146273816	5	cg17476910,cg04483163,cg01511022,cg20769700,cg04494789	_,_	N_Shore,N_Shore,Island,Island,S_Shore	_,_	_,_
1	146822271	146822673	4	cg18404366,cg18242427,cg18376472,cg06616806	_,_	Island,Island,Island,Island	_,_	_,_
1	147131253	147132216	3	cg13494933,cg06872981,cg17009073	_,_	Island,Island,S_Shore	_,_	_,_
1	147167747	147169079	3	cg07719261,cg01925498,cg05650810	_,_	N_Shore,N_Shore,Island	_,_	_,_
1	147196694	147196844	2	cg25095697,cg00097790	TSS1500;Body;Body,TSS200;Body;Body	_,_	LOC645166;LOC645166;LOC645166,LOC645166;LOC645166;LOC645166	NR_027354;NR_027356;NR_027355,NR_027354;NR_027356;NR_027355
1	147404132	147405075	3	cg20768669,cg13529755,cg21273659	_,_	N_Shore,Island,S_Shore	_,_	_,_
1	147422399	147423294	2	cg23034922,cg06921319	_,_	N_Shore,Island	_,_	_,_
1	148520466	148522127	12	cg15642292,cg07702853,cg21831898,cg11207983,cg07916884,cg06982544,cg21715963,cg10055771,cg01464052,cg00764612,cg09563216,cg03960066	TSS1500,TSS1500,TSS1500,TSS1500,TSS1500,TSS1500,TSS1500,TSS1500,TSS200,TSS200,1stExon;5UTR,1stExon;5UTR	N_Shore,N_Shore,Island,Island,Island,Island,S_Shore,S_Shore,S_Shore,S_Shore,S_Shore,S_Shore	C1orf51,C1orf51,C1orf51,C1orf51,C1orf51,C1orf51,C1orf51,C1orf51,C1orf51,C1orf51,C1orf51;C1orf51,C1orf51;C1orf51	NM_144697,NM_144697,NM_144697,NM_144697,NM_144697,NM_144697,NM_144697,NM_144697,NM_144697,NM_144697,NM_144697;NM_144697,NM_144697;NM_144697
1	148755068	148755429	2	cg00502963,cg03851496	_,_	S_Shore,S_Shore	_,_	_,_
1	149404243	149404300	2	cg11205312,cg06902698	TSS1500;Body;1stExon,TSS1500;Body;1stExon	_,_	SCNM1;LYSMD1;LYSMD1,SCNM1;LYSMD1;LYSMD1	NM_024041;NM_001136543;NM_212551,NM_024041;NM_001136543;NM_212551
1	150565508	150565665	2	cg13447818,cg10500702	TSS1500,TSS1500	_,_	FLG,FLG	NM_002016,NM_002016
1	150750299	150751010	2	cg01868128,cg00011513	5UTR,3UTR	_,N_Shelf	LCE5A,LCE5A	NM_178438,NM_178438
1	150936609	150937467	3	cg22616525,cg13974761,cg13697387	TSS1500,TSS1500,1stExon;5UTR	_,_	LCE2A,LCE2A,LCE2A;LCE2A	NM_178428,NM_178428,NM_178428;NM_178428	hyper.chimp
1	145010220	145010668	3	cg26152038,cg17856063,cg23019889	_,_	N_Shore,Island,Island	_,_	_,_	hypo.chimp
1	145015281	145015806	2	cg22671717,cg06317351	_,_	N_Shore,N_Shore	_,_	_,_	hypo.chimp
1	147553700	147553927	2	cg19612827,cg10242032	Body,Body	Island,Island	LOC388692,LOC388692	NR_027002,NR_027002	hypo.chimp
1	147665798	147666976	4	cg13962321,cg14497172,cg16519842,cg24437737	1stExon,TSS1500,TSS1500,TSS1500	Island,N_Shore,Island,Island	HIST2H2BF,HIST2H2BF,HIST2H2BF,HIST2H2BF	NM_001024599,NM_001024599,NM_001024599,NM_001024599	hypo.chimp
1	147939249	147939952	3	cg07591519,cg05024121,cg09785984	_,_	Island,Island,Island	_,_	_,_	hypo.chimp
1	148051195	148051835	2	cg12769994,cg08636083	TSS1500;TSS1500,TSS1500;1stExon;TSS1500	N_Shore,Island	HIST2H2BF;HIST2H2BF,HIST2H2BF;HIST2H3D;HIST2H2BF	NM_001024599;NM_001161334,NM_001024599;NM_001123375;NM_001161334	hypo.chimp
1	148138249	148138569	3	cg27541317,cg24364827,cg09045105	Body,Body,Body	Island,Island,Island	BOLA1,BOLA1,BOLA1	NM_016074,NM_016074,NM_016074	hypo.chimp
1	148174937	148175230	3	cg13476072,cg00777271,cg02086349	Body;TSS200,1stExon;TSS1500,5UTR;1stExon;TSS1500	_,_	MTMR11;MTMR11,MTMR11;MTMR11,MTMR11;MTMR11;MTMR11	NM_001145862;NM_181873,NM_001145862;NM_181873,NM_001145862;NM_001145862;NM_181873
1	149220304	149221178	4	cg25468058,cg04144222,cg07337598,cg20437604	TSS1500,TSS1500,TSS1500,1stExon;5UTR	_,_	ANXA9,ANXA9,ANXA9,ANXA9;ANXA9	NM_003568,NM_003568,NM_003568,NM_003568;NM_003568	hypo.chimp
1	149245529	149245716	3	cg07495664,cg01016521,cg06433658	5UTR;1stExon;5UTR;5UTR;5UTR;5UTR;1stExon;1stExon,5UTR;1stExon;5UTR;5UTR;5UTR;5UTR;1stExon;1stExon,5UTR;1stExon;5UTR;5UTR;5UTR;5UTR;1stExon;1stExon	N_Shore,N_Shore,N_Shore	FAM63A;FAM63A;FAM63A;FAM63A;FAM63A;FAM63A;FAM63A;FAM63A,FAM63A;FAM63A;FAM63A;FAM63A;FAM63A;FAM63A;FAM63A;FAM63A,FAM63A;FAM63A;FAM63A;FAM63A;FAM63A;FAM63A;FAM63A;FAM63A	NM_001040217;NM_001163260;NM_018379;NM_001163260;NM_001163259;NM_001163258;NM_001040217;NM_001163259,NM_001040217;NM_001163260;NM_018379;NM_001163260;NM_001163259;NM_001163258;NM_001040217;NM_001163259,NM_001040217;NM_001163260;NM_018379;NM_001163260;NM_001163259;NM_001163258;NM_001040217;NM_001163259
1	149247008	149247035	2	cg21147147,cg09028383	5UTR;TSS1500;5UTR;TSS1500;TSS1500;TSS1500,5UTR;TSS1500;5UTR;TSS1500;TSS1500;TSS1500	N_Shore,N_Shore	FAM63A;PRUNE;FAM63A;FAM63A;FAM63A;FAM63A,FAM63A;PRUNE;FAM63A;FAM63A;FAM63A;FAM63A	NM_018379;NM_021222;NM_001163258;NM_001040217;NM_001163260;NM_001163259,NM_018379;NM_021222;NM_001163258;NM_001040217;NM_001163260;NM_001163259
1	149395686	149395784	2	cg16565154,cg21544402	TSS200,1stExon;5UTR	_,_	TNFAIP8L2,TNFAIP8L2;TNFAIP8L2	NM_024575,NM_024575;NM_024575	hypo.chimp
1	151014096	151014186	2	cg23413307,cg13493250	TSS1500,TSS1500	_,_	LCE1F,LCE1F	NM_178354,NM_178354	hyper.chimp
1	151775499	151775908	2	cg22792473,cg24375627	TSS200,TSS1500	S_Shore,S_Shore	S100A6,S100A6	NM_014624,NM_014624	hypo.chimp
1	151805388	151806028	2	cg22700686,cg02332117	TSS1500,TSS1500	_,_	S100A2,S100A2	NM_005978,NM_005978	hyper.chimp
1	152217467	152217491	2	cg03655142,cg01588224	TSS1500,TSS1500	S_Shore,S_Shore	JTB,JTB	NM_006694,NM_006694	hypo.chimp
1	153252862	153253136	2	cg17588293,cg01782486	5UTR,5UTR	N_Shelf,N_Shelf	ZBTB7B,ZBTB7B	NM_015872,NM_015872	hypo.chimp
1	153320447	153320475	2	cg00449821,cg00267713	Body,Body	Island,Island	EFNA3,EFNA3	NM_004952,NM_004952	hyper.chimp
1	153443861	153444185	2	cg01428953,cg16416987	Body;TSS1500;TSS1500,Body;TSS1500;TSS1500	N_Shore,N_Shore	THBS3;MTX1;MTX1,THBS3;MTX1;MTX1	NM_007112;NM_198883;NM_002455,NM_007112;NM_198883;NM_002455	hypo.chimp
1	153556860	153557921	4	cg24547565,cg15113766,cg15676040,cg22234962	TSS1500;Body;Body;TSS1500;Body,TSS1500;3UTR;3UTR;3UTR;TSS1500;3UTR,TSS200;3UTR;3UTR;3UTR;TSS200;3UTR,5UTR;5UTR;5UTR	N_Shore,N_Shore,N_Shore,N_Shore	RUSC1;FDPS;FDPS;RUSC1;FDPS,RUSC1;C1orf104;FDPS;FDPS;RUSC1;FDPS,RUSC1;C1orf104;FDPS;FDPS;RUSC1;FDPS,RUSC1;RUSC1;C1orf104	NM_001105204;NM_001135822;NM_001135821;NM_001105203;NM_002004,NM_001105204;NM_001039517;NM_002004;NM_001135822;NM_001105203;NM_001135821,NM_001105203;NM_001039517;NM_002004;NM_001135822;NM_001105204;NM_001135821,NM_001105203;NM_001105204;NM_001039517
1	154484605	154484718	3	cg26541780,cg01583940,cg12303685	TSS200;TSS200,TSS1500;TSS200,TSS1500;TSS1500	S_Shelf,S_Shelf,S_Shelf	PAQR6;PAQR6,PAQR6;PAQR6,PAQR6;PAQR6	NM_198406;NM_024897,NM_198406;NM_024897,NM_198406;NM_024897
1	154827767	154827770	2	cg16564525,cg15208197	TSS1500,TSS1500	N_Shore,N_Shore	APOA1BP,APOA1BP	NM_144772,NM_144772
1	158160295	158160685	3	cg03651478,cg22698489,cg16107628	5UTR,5UTR,5UTR	N_Shore,N_Shore,N_Shore	TAGLN2,TAGLN2,TAGLN2	NM_003564,NM_003564,NM_003564	hypo.chimp
1	154430468	154430523	2	cg25208724,cg24450063	5UTR;1stExon,5UTR;1stExon	Island,Island	SLC25A44;SLC25A44,SLC25A44;SLC25A44	NM_014655;NM_014655,NM_014655;NM_014655	hyper.chimp
1	154605263	154605910	8	cg24473450,cg13423770,cg07702888,cg17935233,cg03917423,cg15120454,cg06216293,cg17820306	TSS1500;TSS1500,TSS1500;TSS1500,TSS1500;TSS1500,TSS200;TSS200,1stExon;Body;5UTR,1stExon;Body,Body;Body,Body;Body	N_Shore,Island,Island,Island,Island,Island,Island,S_Shore	RHBG;RHBG,RHBG;RHBG,RHBG;RHBG,RHBG;RHBG,RHBG;RHBG;RHBG,RHBG;RHBG,RHBG;RHBG,RHBG;RHBG	NR_026549;NM_020407,NR_026549;NM_020407,NR_026549;NM_020407,NR_026549;NM_020407,NM_020407;NR_026549;NM_020407,NM_020407;NR_026549,NM_020407;NR_026549,NM_020407;NR_026549
1	154838167	154838222	3	cg11192022,cg06957169,cg14611278	TSS1500;TSS1500,TSS1500;TSS1500,TSS1500;TSS1500	_,_	GPATCH4;GPATCH4,GPATCH4;GPATCH4,GPATCH4;GPATCH4	NM_015590;NM_182679,NM_015590;NM_182679,NM_015590;NM_182679
1	156386019	156386669	5	cg25200182,cg20030310,cg24298311,cg18873957,cg25302284	_,_	N_Shore,Island,Island,Island,S_Shore	_,_	_,_
1	158320313	158320843	4	cg13552867,cg20489026,cg15580417,cg08187246	5UTR,Body,Body,Body	N_Shore,Island,Island,Island	KCNJ9,KCNJ9,KCNJ9,KCNJ9	NM_004983,NM_004983,NM_004983,NM_004983	hyper.chimp
1	158442020	158442598	2	cg20420867,cg11194994	5UTR,5UTR	Island,S_Shore	PEA15,PEA15	NM_003768,NM_003768	hypo.chimp
1	159388678	159389584	2	cg04573771,cg16673712	TSS1500,TSS1500	_,_	UFC1,UFC1	NM_016406,NM_016406	hypo.chimp
1	159438093	159438443	3	cg08850169,cg07580762,cg21691116	5UTR;TSS1500,5UTR;TSS200,5UTR;TSS200	N_Shore,Island,Island	NDUFS2;NDUFS2,NDUFS2;NDUFS2,NDUFS2;NDUFS2	NM_004550;NM_001166159,NM_004550;NM_001166159,NM_004550;NM_001166159
1	161439664	161439886	2	cg24901474,cg02579477	TSS200,TSS1500	_,_	RGS5,RGS5	NM_003617,NM_003617
1	165112245	165112650	2	cg16562251,cg20672205	1stExon;5UTR,TSS1500	Island,S_Shore	TADA1;TADA1,TADA1	NM_053053;NM_053053,NM_053053	hyper.chimp
1	159550270	159550542	5	cg13788685,cg11744295,cg08716396,cg15152945,cg02656741	TSS1500;TSS1500;TSS1500;TSS1500;TSS1500,TSS1500;TSS1500;TSS1500;TSS1500;TSS1500,TSS1500;TSS1500;TSS1500;TSS1500;TSS1500,TSS1500;TSS1500;TSS1500;TSS1500;TSS1500,TSS1500;TSS1500;TSS1500;TSS1500;TSS1500	N_Shore,Island,Island,Island,Island	SDHC;SDHC;LOC642502;SDHC;SDHC,SDHC;SDHC;LOC642502;SDHC;SDHC,SDHC;SDHC;LOC642502;SDHC;SDHC,SDHC;SDHC;LOC642502;SDHC;SDHC,SDHC;SDHC;LOC642502;SDHC;SDHC	NM_001035512;NM_001035513;NM_001089593;NM_001035511;NM_003001,NM_001035512;NM_001035513;NM_001089593;NM_001035511;NM_003001,NM_001035512;NM_001035513;NM_001089593;NM_001035511;NM_003001,NM_001035512;NM_001035513;NM_001089593;NM_001035511;NM_003001,NM_001035512;NM_001035513;NM_001089593;NM_001035511;NM_003001	hypo.chimp
1	159635411	159635571	2	cg23915527,cg03441844	_,_	N_Shore,Island	_,_	_,_	hypo.chimp
1	162947891	162948276	2	cg25148025,cg14031054	Body,Body	_,_	PBX1,PBX1	NM_002585,NM_002585	hypo.chimp
1	163679947	163681664	5	cg07163547,cg00349776,cg08623787,cg12404281,cg17514495	Body;Body,5UTR;5UTR;1stExon;1stExon,TSS200;TSS200,TSS1500;TSS1500,TSS1500;TSS1500	_,_	RXRG;RXRG,RXRG;RXRG;RXRG;RXRG,RXRG;RXRG,RXRG;RXRG,RXRG;RXRG	NM_006917;NM_001009598,NM_001009598;NM_006917;NM_006917;NM_001009598,NM_006917;NM_001009598,NM_006917;NM_001009598,NM_006917;NM_001009598	hypo.chimp
1	165119902	165120239	4	cg03433241,cg11849738,cg26248173,cg15473017	_,_	Island,Island,Island,Island	_,_	_,_	hyper.chimp
1	165357242	165357381	2	cg04138112,cg11236550	Body,Body	Island,Island	DUSP27,DUSP27	NM_001080426,NM_001080426	hyper.chimp
1	165675133	165675822	7	cg01396157,cg21161394,cg02648847,cg12446199,cg06900257,cg12184421,cg11958495	Body;Body,Body;Body,Body;Body,Body;Body,Body;Body,Body;Body,Body;Body	N_Shore,Island,Island,Island,Island,Island,S_Shore	CD247;CD247,CD247;CD247,CD247;CD247,CD247;CD247,CD247;CD247,CD247;CD247,CD247;CD247	NM_198053;NM_000734,NM_198053;NM_000734,NM_198053;NM_000734,NM_198053;NM_000734,NM_198053;NM_000734,NM_198053;NM_000734,NM_198053;NM_000734	hyper.chimp
1	165865145	165865748	4	cg15676719,cg04275362,cg12336540,cg04259326	TSS1500,TSS1500,TSS1500,TSS1500	N_Shore,N_Shore,N_Shore,N_Shore	RCSD1,RCSD1,RCSD1,RCSD1	NM_052862,NM_052862,NM_052862,NM_052862	hypo.chimp
1	165957062	165957350	2	cg04846203,cg01565130	TSS1500;TSS1500;TSS1500,TSS1500;TSS1500;TSS1500	N_Shore,N_Shore	MPZL1;MPZL1;MPZL1,MPZL1;MPZL1;MPZL1	NM_024569;NM_003953;NM_001146191,NM_024569;NM_003953;NM_001146191	hypo.chimp
1	166461570	166461732	2	cg20480045,cg12154153	TSS1500,TSS200	Island,Island	SFT2D2,SFT2D2	NM_199344,NM_199344	hypo.chimp
1	168381666	168381975	2	cg12500707,cg03192897	TSS200,1stExon	_,_	METTL11B,METTL11B	NM_001136107,NM_001136107	hyper.chimp
1	168895480	168896179	3	cg12439157,cg11953609,cg22795586	_,_	N_Shore,N_Shore,N_Shore	_,_	_,_	hyper.chimp
1	172101454	172101888	3	cg06644515,cg14564638,cg03044573	TSS1500;Body;TSS1500;TSS1500;TSS200;TSS1500,Body;TSS1500;TSS200;TSS1500;TSS1500,Body;TSS1500;TSS200;TSS1500;TSS1500	N_Shelf,N_Shore,N_Shore	SNORD47;GAS5;SNORD81;SNORD80;SNORD78;SNORD79,GAS5;SNORD78;SNORD44;SNORD80;SNORD79,GAS5;SNORD78;SNORD44;SNORD80;SNORD79	NR_002746;NR_002578;NR_003938;NR_003940;NR_003944;NR_003939,NR_002578;NR_003944;NR_002750;NR_003940;NR_003939,NR_002578;NR_003944;NR_002750;NR_003940;NR_003939	hypo.chimp
1	173234318	173234767	2	cg04085339,cg16743289	TSS1500;TSS1500,TSS1500;TSS1500	N_Shore,N_Shore	CACYBP;CACYBP,CACYBP;CACYBP	NM_014412;NM_001007214,NM_014412;NM_001007214	hypo.chimp
1	177811778	177812291	2	cg10711209,cg24867790	TSS200,TSS1500	Island,S_Shore	NPHS2,NPHS2	NM_014625,NM_014625	hyper.chimp
1	177978206	177978814	2	cg02634341,cg09683824	TSS1500,TSS200	N_Shore,Island	FAM163A,FAM163A	NM_173509,NM_173509	hyper.chimp
1	178051118	178051343	2	cg25369168,cg05392737	3UTR,3UTR	_,_	FAM163A,FAM163A	NM_173509,NM_173509	hyper.chimp
1	178738830	178738977	2	cg08270031,cg20824549	TSS200,TSS1500	Island,S_Shore	ACBD6,ACBD6	NM_032360,NM_032360	hypo.chimp
1	179323902	179324081	3	cg22801949,cg07969646,cg24915511	TSS1500,TSS200,TSS200	N_Shore,N_Shore,N_Shore	IER5,IER5,IER5	NM_016545,NM_016545,NM_016545	hypo.chimp
1	180823840	180824605	2	cg13372635,cg27563952	TSS1500,_	_,_	RNASEL,_	NM_021133,_	hypo.chimp
1	180839778	180840612	2	cg16824301,cg03517466	Body,TSS1500	N_Shore,S_Shore	RGS16,RGS16	NM_002928,NM_002928	hypo.chimp
1	181074585	181074766	2	cg16243197,cg25133192	TSS1500,TSS1500	N_Shore,N_Shore	DHX9,DHX9	NM_001357,NM_001357	hypo.chimp
1	183553619	183553771	2	cg05377162,cg17297305	TSS1500,TSS1500	S_Shore,S_Shore	IVNS1ABP,IVNS1ABP	NM_006469,NM_006469	hypo.chimp
1	198538735	198538838	3	cg06811094,cg22810423,cg07138399	_,_	S_Shore,S_Shore,S_Shore	_,_	_,_	hyper.chimp
1	199349605	199350082	2	cg17810781,cg18471160	TSS1500,_	N_Shore,Island	CACNA1S,_	NM_000069,_	hyper.chimp
1	199518947	199519357	7	cg02855983,cg08872722,cg17463149,cg19570545,cg09279512,cg09472802,cg22606205	TSS1500;TSS1500,TSS1500;TSS1500,TSS200;TSS200,TSS200;TSS200,TSS200;TSS200,5UTR;5UTR;1stExon;1stExon,5UTR;5UTR;1stExon;1stExon	N_Shore,N_Shore,Island,Island,Island,Island,Island	PKP1;PKP1,PKP1;PKP1,PKP1;PKP1,PKP1;PKP1,PKP1;PKP1,PKP1;PKP1;PKP1;PKP1,PKP1;PKP1;PKP1;PKP1	NM_000299;NM_001005337,NM_000299;NM_001005337,NM_000299;NM_001005337,NM_000299;NM_001005337,NM_000299;NM_001005337,NM_001005337;NM_000299;NM_000299;NM_001005337,NM_001005337;NM_000299;NM_000299;NM_001005337	hyper.chimp
1	201290260	201291082	3	cg00964446,cg14084623,cg01781649	Body,Body,Body	_,_	PPFIA4,PPFIA4,PPFIA4	NM_015053,NM_015053,NM_015053	hyper.chimp
1	201361819	201362671	3	cg10111764,cg24141663,cg11341981	_,TSS1500;TSS1500,TSS1500;TSS1500	N_Shelf,N_Shore,N_Shore	_,ADORA1;ADORA1,ADORA1;ADORA1	_,NM_000674;NM_001048230,NM_000674;NM_001048230	hypo.chimp
1	201540316	201540757	2	cg00567854,cg00860712	TSS1500,TSS1500	N_Shore,N_Shore	BTG2,BTG2	NM_006763,NM_006763	hyper.chimp
1	201542550	201543218	2	cg23371584,cg01798157	Body,3UTR	S_Shore,S_Shore	BTG2,BTG2	NM_006763,NM_006763
1	203666354	203666568	3	cg11980944,cg24339193,cg06849719	_,_	_,_	_,_	_,_
1	207448240	207448400	2	cg09117778,cg17082959	_,_	_,_	_,_	_,_
1	207471673	207471687	2	cg11379081,cg00563824	_,_	Island,Island	_,_	_,_
1	209622356	209622909	4	cg01421119,cg05785348,cg13768174,cg09366861	TSS1500,TSS1500,Body,Body	N_Shore,N_Shore,Island,Island	C1orf97,C1orf97,C1orf97,C1orf97	NR_026761,NR_026761,NR_026761,NR_026761
1	209938785	209939276	2	cg04792270,cg23652484	_,_	_,_	_,_	_,_
1	210071091	210071427	2	cg26659410,cg08892386	TSS1500,TSS1500	S_Shore,S_Shore	LPGAT1,LPGAT1	NM_014873,NM_014873
1	210525349	210525361	2	cg08243778,cg26187514	TSS200,TSS200	Island,Island	PPP2R5A,PPP2R5A	NM_006243,NM_006243
1	211156739	211156863	2	cg15130102,cg12596505	_,_	_,_	_,_	_,_
1	212219332	212219428	2	cg00668303,cg26054764	_,_	N_Shore,N_Shore	_,_	_,_
1	218512602	218512830	5	cg11570585,cg27546195,cg12054080,cg01795562,cg16257868	TSS200,TSS200,TSS1500,TSS1500,TSS1500	S_Shore,S_Shore,S_Shore,S_Shore,S_Shore	RAB3GAP2,RAB3GAP2,RAB3GAP2,RAB3GAP2,RAB3GAP2	NM_012414,NM_012414,NM_012414,NM_012414,NM_012414
1	222595371	222595500	3	cg15988514,cg17296990,cg11231715	_,_	_,_	_,_	_,_
1	223931733	223932110	3	cg16247183,cg14207589,cg01077274	_,_	Island,Island,S_Shore	_,_	_,_
1	226141120	226142372	5	cg11223365,cg14287512,cg10909939,cg12210914,cg10962762	_,_	N_Shore,N_Shore,Island,Island,Island	_,_	_,_
1	226201332	226201556	2	cg04347016,cg22525281	Body,Body	Island,Island	WNT9A,WNT9A	NM_003395,NM_003395
1	226364487	226364598	2	cg22163199,cg08158976	TSS1500;TSS1500;TSS1500;TSS1500;TSS1500;TSS1500;TSS1500;TSS1500,TSS1500;TSS1500;TSS1500;TSS1500;TSS1500;TSS1500;TSS1500;TSS1500	S_Shore,S_Shore	MRPL55;MRPL55;MRPL55;MRPL55;MRPL55;MRPL55;MRPL55;MRPL55,MRPL55;MRPL55;MRPL55;MRPL55;MRPL55;MRPL55;MRPL55;MRPL55	NM_181441;NM_181464;NM_181456;NM_181465;NM_181462;NM_181455;NM_181454;NM_181463,NM_181441;NM_181464;NM_181456;NM_181465;NM_181462;NM_181455;NM_181454;NM_181463
1	226530672	226531017	4	cg13372766,cg10220895,cg04850211,cg05844789	Body;Body,Body;Body,Body;Body,Body;Body	Island,Island,Island,Island	OBSCN;OBSCN,OBSCN;OBSCN,OBSCN;OBSCN,OBSCN;OBSCN	NM_052843;NM_001098623,NM_052843;NM_001098623,NM_052843;NM_001098623,NM_052843;NM_001098623
1	227711023	227711130	3	cg18058949,cg26804128,cg15995216	TSS1500,TSS1500,TSS1500	S_Shore,S_Shore,S_Shore	NUP133,NUP133,NUP133	NM_018230,NM_018230,NM_018230
1	231007613	231008398	8	cg02191044,cg02903907,cg18196782,cg15542798,cg16430166,cg05460318,cg06935979,cg00951395	1stExon,1stExon,1stExon,1stExon,1stExon,1stExon,1stExon,1stExon	N_Shore,Island,Island,Island,Island,Island,Island,S_Shore	KIAA1383,KIAA1383,KIAA1383,KIAA1383,KIAA1383,KIAA1383,KIAA1383,KIAA1383	NM_019090,NM_019090,NM_019090,NM_019090,NM_019090,NM_019090,NM_019090,NM_019090
1	231315332	231315468	2	cg00980058,cg16371229	Body,Body	_,_	PCNXL2,PCNXL2	NM_014801,NM_014801
1	232106601	232106668	2	cg18115428,cg10878114	TSS1500,TSS1500	N_Shore,N_Shore	SLC35F3,SLC35F3	NM_173508,NM_173508
1	238722840	238723290	5	cg25623271,cg01809217,cg02577267,cg22879626,cg04391463	3UTR,Body,Body,Body,Body	N_Shore,Island,Island,Island,Island	GREM2,GREM2,GREM2,GREM2,GREM2	NM_022469,NM_022469,NM_022469,NM_022469,NM_022469	hyper.chimp
1	201729018	201729861	2	cg25384293,cg17267628	TSS1500,TSS200	_,_	OPTC,OPTC	NM_014359,NM_014359	hypo.chimp
1	203592482	203592694	3	cg27529555,cg21996351,cg08159989	5UTR;1stExon,TSS200,TSS200	_,_	KLHDC8A;KLHDC8A,KLHDC8A,KLHDC8A	NM_018203;NM_018203,NM_018203,NM_018203
1	203608963	203608973	2	cg08473693,cg18759595	_,_	_,_	_,_	_,_
1	203828429	203828529	3	cg12481266,cg18271913,cg00855731	Body,Body,Body	S_Shore,S_Shore,S_Shore	MFSD4,MFSD4,MFSD4	NM_181644,NM_181644,NM_181644
1	204874797	204874873	2	cg09328024,cg18759190	TSS1500;TSS1500,TSS1500;TSS1500	N_Shore,N_Shore	DYRK3;DYRK3,DYRK3;DYRK3	NM_001004023;NM_003582,NM_001004023;NM_003582
1	207892354	207892370	2	cg26533764,cg03977657	1stExon;TSS1500;5UTR;TSS200,1stExon;TSS1500;5UTR;TSS200	_,_	LAMB3;LAMB3;LAMB3;LAMB3,LAMB3;LAMB3;LAMB3;LAMB3	NM_000228;NM_001017402;NM_000228;NM_001127641,NM_000228;NM_001017402;NM_000228;NM_001127641
1	208067689	208067902	3	cg09163369,cg23166289,cg04558166	TSS1500,TSS1500,TSS200	N_Shore,N_Shore,Island	C1orf107,C1orf107,C1orf107	NM_014388,NM_014388,NM_014388
1	210754465	210755620	6	cg00019759,cg14988680,cg11968804,cg18147098,cg10533103,cg23075506	_,_	N_Shore,Island,Island,S_Shore,S_Shore,S_Shore	_,_	_,_
1	219130107	219131011	2	cg25464265,cg07903237	_,_	N_Shore,N_Shore	_,_	_,_
1	221382509	221383380	2	cg05858079,cg07538512	5UTR,TSS200	N_Shore,S_Shore	TLR5,TLR5	NM_003268,NM_003268	hypo.chimp
1	224032299	224032301	2	cg00777895,cg15064019	1stExon;1stExon,1stExon;1stExon	Island,Island	SRP9;SRP9,SRP9;SRP9	NM_001130440;NM_003133,NM_001130440;NM_003133	hypo.chimp
1	224079130	224079835	2	cg03337430,cg17468616	TSS1500;5UTR,1stExon;5UTR;5UTR	_,_	EPHX1;EPHX1,EPHX1;EPHX1;EPHX1	NM_000120;NM_001136018,NM_000120;NM_000120;NM_001136018
1	224178996	224179157	2	cg07049680,cg06939851	TSS1500,TSS1500	Island,Island	PYCR2,PYCR2	NM_013328,NM_013328
1	224338422	224339386	2	cg16532282,cg26612648	_,_	Island,S_Shore	_,_	_,_
1	224990880	224990934	2	cg05306109,cg23717186	Body,Body	N_Shore,N_Shore	ITPKB,ITPKB	NM_002221,NM_002221
1	226262402	226262821	2	cg18642177,cg17318529	Body,Body	Island,Island	WNT3A,WNT3A	NM_033131,NM_033131
1	226403804	226404126	3	cg24052475,cg01789576,cg03065165	TSS1500,TSS1500,TSS200	_,_	GJC2,GJC2,GJC2	NM_020435,NM_020435,NM_020435
1	226468659	226468928	2	cg18477163,cg08312035	Body;Body,Body;Body	Island,N_Shore	OBSCN;OBSCN,OBSCN;OBSCN	NM_052843;NM_001098623,NM_052843;NM_001098623
1	226719678	226719759	3	cg07101354,cg20411935,cg23239574	_,_	S_Shore,S_Shore,S_Shore	_,_	_,_
1	229365656	229366019	3	cg03350439,cg17137424,cg07850592	1stExon,1stExon,1stExon	Island,Island,Island	TRIM67,TRIM67,TRIM67	NM_001004342,NM_001004342,NM_001004342
1	233357028	233357747	2	cg19746343,cg10234506	Body,Body;Body	N_Shore,N_Shore	TOMM20,SNORA14B;TOMM20	NM_014765,NR_002956;NM_014765
1	234578169	234578250	2	cg26797158,cg11527988	_,_	Island,Island	_,_	_,_
1	234753187	234753676	5	cg01030476,cg18322510,cg09334514,cg08137948,cg13444964	TSS200;TSS200;5UTR;TSS1500,TSS200;TSS200;5UTR;TSS1500,TSS200;TSS200;5UTR;TSS1500,5UTR;1stExon;5UTR;5UTR;TSS1500;1stExon,5UTR;TSS200;5UTR;5UTR	N_Shore,N_Shore,N_Shore,N_Shore,N_Shore	LGALS8;LGALS8;LGALS8;LGALS8,LGALS8;LGALS8;LGALS8;LGALS8,LGALS8;LGALS8;LGALS8;LGALS8,LGALS8;LGALS8;LGALS8;LGALS8;LGALS8;LGALS8,LGALS8;LGALS8;LGALS8;LGALS8	NM_201543;NM_006499;NM_201545;NM_201544,NM_201543;NM_006499;NM_201545;NM_201544,NM_201543;NM_006499;NM_201545;NM_201544,NM_201543;NM_201543;NM_006499;NM_201545;NM_201544;NM_006499,NM_201543;NM_201544;NM_006499;NM_201545	hypo.chimp
1	234916096	234916855	2	cg10372476,cg21376883	TSS1500,Body	Island,Island	ACTN2,ACTN2	NM_001103,NM_001103	hypo.chimp
1	241704461	241704589	2	cg22514764,cg17110767	Body,Body	Island,Island	SDCCAG8,SDCCAG8	NM_006642,NM_006642	hyper.chimp
1	241720113	241720280	2	cg01833436,cg20059832	Body;3UTR,Body;3UTR	S_Shore,S_Shore	SDCCAG8;AKT3,SDCCAG8;AKT3	NM_006642;NM_181690,NM_006642;NM_181690	hyper.chimp
1	242146737	242146991	2	cg18085407,cg00705059	_,_	N_Shore,N_Shore	_,_	_,_	hyper.chimp
1	242161492	242161558	3	cg13939055,cg00823843,cg13808012	_,_	Island,Island,Island	_,_	_,_	hypo.chimp
1	242281216	242281302	2	cg01105418,cg23829949	1stExon;5UTR,1stExon;5UTR	S_Shore,S_Shore	ZNF238;ZNF238,ZNF238;ZNF238	NM_205768;NM_205768,NM_205768;NM_205768	hypo.chimp
1	242581843	242582645	2	cg26108836,cg08943180	TSS1500,5UTR;1stExon	_,_	C1orf100,C1orf100;C1orf100	NM_001012970,NM_001012970;NM_001012970
1	244997578	244998519	2	cg24633745,cg06613253	3UTR,_	_,_	SCCPDH,_	NM_016002,_	hypo.chimp
1	242959607	242960279	2	cg12726120,cg11053304	_,_	N_Shore,Island	_,_	_,_	hyper.chimp
1	244737349	244737563	3	cg12139096,cg09413723,cg01396391	TSS200,TSS1500,TSS1500	Island,S_Shore,S_Shore	SMYD3,SMYD3,SMYD3	NM_001167740,NM_001167740,NM_001167740	hyper.chimp
1	244926512	244926630	3	cg07044276,cg02951974,cg07018435	_,_	_,_	_,_	_,_	hyper.chimp
1	245603782	245603992	3	cg21397540,cg23226914,cg27305735	_,_	_,_	_,_	_,_	hyper.chimp
1	245869326	245869656	6	cg27543040,cg02518135,cg25220063,cg25017620,cg15829088,cg25007722	_,_	N_Shore,Island,Island,Island,Island,Island	_,_	_,_	hyper.chimp
1	246921901	246921987	2	cg07726288,cg08121453	_,_	Island,Island	_,_	_,_	hypo.chimp
2	37452	37889	4	cg20318662,cg15574509,cg23574281,cg09563102	TSS1500,TSS1500,TSS1500,_	S_Shore,S_Shore,S_Shore,S_Shore	FAM110C,FAM110C,FAM110C,_	NM_001077710,NM_001077710,NM_001077710,_	hypo.chimp
2	372090	372237	2	cg07160793,cg19710238	_,_	_,_	_,_	_,_	hypo.chimp
2	458737	459214	5	cg04709035,cg22490454,cg26349358,cg13973086,cg08031492	_,_	S_Shore,S_Shore,S_Shore,S_Shore,S_Shore	_,_	_,_	hypo.chimp
2	495661	496174	2	cg18524114,cg23063807	_,_	S_Shore,S_Shelf	_,_	_,_	hyper.chimp
2	650692	650856	2	cg04589008,cg02783887	_,_	Island,Island	_,_	_,_	hypo.chimp
2	786359	786536	2	cg07478785,cg02762063	_,_	_,_	_,_	_,_	hypo.chimp
2	918673	918750	2	cg09581060,cg14323539	_,_	_,_	_,_	_,_	hypo.chimp
2	1750415	1750906	2	cg15806569,cg07547403	_,_	_,_	_,_	_,_	hypo.chimp
2	1799322	1799440	2	cg14463068,cg23861841	Body,Body	_,_	MYT1L,MYT1L	NM_015025,NM_015025	hypo.chimp
2	1800740	1801079	2	cg02542953,cg14651742	Body,Body	_,_	MYT1L,MYT1L	NM_015025,NM_015025	hypo.chimp
2	1874198	1874414	2	cg19139320,cg10215032	Body,Body	N_Shore,N_Shore	MYT1L,MYT1L	NM_015025,NM_015025	hypo.chimp
2	2526096	2526124	2	cg14042190,cg03447699	_,_	_,_	_,_	_,_	hyper.chimp
2	3620275	3620742	8	cg18105675,cg10945539,cg19867917,cg09974661,cg00835279,cg17872886,cg16430428,cg26615126	TSS1500;TSS1500,TSS200;TSS200,TSS200;TSS200,TSS200;TSS200,1stExon;5UTR;1stExon;5UTR,1stExon;5UTR;1stExon;5UTR,5UTR;5UTR,5UTR;5UTR	N_Shore,N_Shore,Island,Island,Island,Island,S_Shore,S_Shore	COLEC11;COLEC11,COLEC11;COLEC11,COLEC11;COLEC11,COLEC11;COLEC11,COLEC11;COLEC11;COLEC11;COLEC11,COLEC11;COLEC11;COLEC11;COLEC11,COLEC11;COLEC11,COLEC11;COLEC11	NM_024027;NM_199235,NM_199235;NM_024027,NM_199235;NM_024027,NM_199235;NM_024027,NM_024027;NM_024027;NM_199235;NM_199235,NM_024027;NM_024027;NM_199235;NM_199235,NM_024027;NM_199235,NM_024027;NM_199235	hypo.chimp
2	3728827	3729545	2	cg11857704,cg04695513	_,_	Island,Island	_,_	_,_	hyper.chimp
2	3806161	3806441	2	cg12573791,cg21204020	_,_	_,_	_,_	_,_	hyper.chimp
2	5730709	5731317	3	cg15309953,cg17213402,cg23883058	_,_	N_Shore,Island,S_Shore	_,_	_,_	hyper.chimp
2	6039131	6039558	5	cg14820415,cg22314787,cg14686555,cg22202692,cg13217590	TSS1500,TSS200,TSS200,TSS200,TSS200	_,_	LOC400940,LOC400940,LOC400940,LOC400940,LOC400940	NR_026833,NR_026833,NR_026833,NR_026833,NR_026833	hyper.chimp
2	6975996	6976481	2	cg06023570,cg02414889	5UTR,5UTR	S_Shore,S_Shore	RNF144A,RNF144A	NM_014746,NM_014746	hyper.chimp
2	8699225	8699272	2	cg10403728,cg24073056	_,_	N_Shelf,N_Shelf	_,_	_,_	hypo.chimp
2	9200591	9200721	2	cg26394466,cg05172956	_,_	_,_	_,_	_,_	hyper.chimp
2	9717902	9718007	3	cg15114522,cg14973360,cg19742935	_,_	_,_	_,_	_,_	hypo.chimp
2	10198610	10198619	2	cg02189784,cg19282973	TSS1500,TSS1500	_,_	C2orf48,C2orf48	NM_182626,NM_182626	hypo.chimp
2	10360310	10361090	3	cg16420247,cg13154104,cg12346749	TSS1500;TSS200,TSS200;5UTR,TSS200;5UTR	Island,Island,Island	HPCAL1;HPCAL1,HPCAL1;HPCAL1,HPCAL1;HPCAL1	NM_134421;NM_002149,NM_134421;NM_002149,NM_134421;NM_002149	hyper.chimp
2	11553482	11553745	3	cg22387781,cg01621716,cg24399204	_,_	_,_	_,_	_,_	hypo.chimp
2	11597323	11597537	2	cg13808071,cg17208060	TSS1500;5UTR,1stExon;5UTR;5UTR	_,_	GREB1;GREB1,GREB1;GREB1;GREB1	NM_148903;NM_014668,NM_148903;NM_148903;NM_014668
2	11727132	11727309	2	cg04141164,cg07258474	1stExon,1stExon	Island,Island	NTSR2,NTSR2	NM_012344,NM_012344
2	11907748	11907944	2	cg20863673,cg21959781	_,_	_,_	_,_	_,_
2	16070957	16071776	3	cg05674602,cg24694501,cg01601949	_,_	N_Shore,Island,Island	_,_	_,_
2	20289130	20289161	2	cg15339720,cg13003011	TSS1500;TSS1500,TSS1500;TSS1500	Island,Island	SDC1;SDC1,SDC1;SDC1	NM_002997;NM_001006946,NM_002997;NM_001006946
2	20305460	20305569	2	cg03425348,cg02591356	_,_	_,_	_,_	_,_
2	23499681	23499761	2	cg02176280,cg21350621	5UTR,5UTR	_,_	KLHL29,KLHL29	NM_052920,NM_052920
2	24015760	24016171	3	cg01809281,cg01853276,cg04619854	TSS1500,TSS1500,TSS1500	N_Shore,N_Shore,N_Shore	UBXN2A,UBXN2A,UBXN2A	NM_181713,NM_181713,NM_181713
2	25243889	25244044	4	cg09527270,cg03560973,cg02079741,cg09672383	5UTR;5UTR,5UTR;5UTR,5UTR;5UTR,5UTR;5UTR	N_Shore,N_Shore,N_Shore,N_Shore	POMC;POMC,POMC;POMC,POMC;POMC,POMC;POMC	NM_000939;NM_001035256,NM_000939;NM_001035256,NM_000939;NM_001035256,NM_000939;NM_001035256
2	25439123	25439173	3	cg15575641,cg11309462,cg19512473	_,_	_,_	_,_	_,_
2	27154756	27155447	4	cg19399165,cg15895197,cg22047282,cg20516209	TSS200,1stExon;5UTR,1stExon;5UTR,1stExon	_,N_Shelf,N_Shelf,N_Shelf	EMILIN1,EMILIN1;EMILIN1,EMILIN1;EMILIN1,EMILIN1	NM_007046,NM_007046;NM_007046,NM_007046;NM_007046,NM_007046
2	27289419	27289615	2	cg21420531,cg01620785	TSS1500;Body;TSS1500;5UTR;Body,TSS1500;Body;TSS1500;5UTR;Body	S_Shore,S_Shore	SLC5A6;C2orf28;SLC5A6;C2orf28;C2orf28,SLC5A6;C2orf28;SLC5A6;C2orf28;C2orf28	NR_028323;NM_080592;NM_021095;NM_016085;NM_001170795,NR_028323;NM_080592;NM_021095;NM_016085;NM_001170795
2	27382829	27383485	4	cg05901357,cg17689799,cg20842253,cg01985390	Body;Body,3UTR;3UTR,3UTR;3UTR,3UTR;3UTR	Island,Island,Island,Island	TRIM54;TRIM54,TRIM54;TRIM54,TRIM54;TRIM54,TRIM54;TRIM54	NM_032546;NM_187841,NM_032546;NM_187841,NM_032546;NM_187841,NM_032546;NM_187841
2	27384824	27385039	2	cg22129545,cg09065714	TSS200,TSS1500	Island,S_Shore	UCN,UCN	NM_003353,NM_003353
2	27704934	27705391	2	cg07628841,cg23039201	TSS200;1stExon;TSS200;TSS1500;5UTR;1stExon;TSS200;TSS1500,5UTR;TSS200;Body;5UTR;TSS200;TSS200;Body;1stExon	_,_	GPN1;CCDC121;GPN1;GPN1;CCDC121;CCDC121;GPN1;GPN1,GPN1;CCDC121;GPN1;GPN1;CCDC121;CCDC121;GPN1;GPN1	NM_001145048;NM_001142683;NM_001145047;NR_026735;NM_024584;NM_001142682;NM_001145049;NM_007266,NM_001145049;NM_024584;NR_026735;NM_001145048;NM_001142682;NM_001142683;NM_001145047;NM_007266	hypo.chimp
2	11887529	11888173	2	cg10018519,cg19924948	_,_	_,_	_,_	_,_	hyper.chimp
2	19931965	19932387	4	cg13491250,cg25947878,cg24770624,cg09336406	_,_	Island,Island,Island,Island	_,_	_,_	hyper.chimp
2	24995520	24995621	2	cg26752663,cg16888658	5UTR;1stExon,TSS200	N_Shore,N_Shore	ADCY3;ADCY3,ADCY3	NM_004036;NM_004036,NM_004036
2	26319989	26320955	2	cg08067268,cg09060316	TSS1500;Body,TSS200;1stExon	N_Shore,Island	HADHB;HADHA,HADHB;HADHA	NM_000183;NM_000182,NM_000183;NM_000182
2	26639338	26639550	3	cg17265788,cg22488717,cg24478803	Body,Body,Body	N_Shore,Island,Island	C2orf70,C2orf70,C2orf70	NM_001105519,NM_001105519,NM_001105519
2	27842228	27842362	3	cg25309888,cg20518572,cg07920525	_,_	_,_	_,_	_,_
2	27847748	27847829	2	cg21083314,cg02833916	TSS1500;TSS1500,TSS1500;TSS1500	N_Shore,N_Shore	MRPL33;MRPL33,MRPL33;MRPL33	NM_145330;NM_004891,NM_145330;NM_004891
2	33554421	33555209	5	cg17598334,cg22053452,cg03693861,cg08852759,cg01247919	5UTR;TSS1500,5UTR;TSS200,5UTR;TSS200,5UTR;TSS200,1stExon;5UTR;5UTR	_,_	RASGRP3;RASGRP3,RASGRP3;RASGRP3,RASGRP3;RASGRP3,RASGRP3;RASGRP3,RASGRP3;RASGRP3;RASGRP3	NM_170672;NM_001139488,NM_170672;NM_001139488,NM_170672;NM_001139488,NM_170672;NM_001139488,NM_001139488;NM_001139488;NM_170672
2	38858745	38859338	2	cg15934678,cg26680517	TSS200,5UTR	_,_	GEMIN6,GEMIN6	NM_024775,NM_024775	hyper.chimp
2	28886703	28887556	2	cg20541961,cg26502666	TSS1500;TSS1500,5UTR;5UTR	N_Shore,S_Shore	SPDYA;SPDYA,SPDYA;SPDYA	NM_182756;NM_001142634,NM_182756;NM_001142634	hypo.chimp
2	29996090	29996246	3	cg02165692,cg00643897,cg10179251	Body,Body,Body	N_Shore,N_Shore,N_Shore	ALK,ALK,ALK	NM_004304,NM_004304,NM_004304	hypo.chimp
2	36776590	36777332	2	cg26638266,cg09154591	TSS1500,TSS200	_,_	VIT,VIT	NM_053276,NM_053276	hypo.chimp
2	37237885	37238212	4	cg01617117,cg05332270,cg16795804,cg14126601	TSS200;TSS200,TSS1500;TSS1500,TSS1500;TSS1500,TSS1500;TSS1500	Island,Island,S_Shore,S_Shore	EIF2AK2;EIF2AK2,EIF2AK2;EIF2AK2,EIF2AK2;EIF2AK2,EIF2AK2;EIF2AK2	NM_001135651;NM_002759,NM_002759;NM_001135651,NM_002759;NM_001135651,NM_002759;NM_001135651	hypo.chimp
2	38616218	38616634	2	cg09047034,cg23078928	_,_	N_Shore,Island	_,_	_,_	hypo.chimp
2	39041263	39041510	3	cg07952813,cg17165695,cg03690080	Body;TSS1500,Body;TSS1500,Body;TSS1500	Island,Island,S_Shore	LOC100271715;LOC375196,LOC100271715;LOC375196,LOC100271715;LOC375196	NM_001145451;NR_028386,NM_001145451;NR_028386,NM_001145451;NR_028386	hyper.chimp
2	39518473	39518690	2	cg01893669,cg11491749	TSS1500,TSS1500	S_Shore,S_Shore	MAP4K3,MAP4K3	NM_003618,NM_003618	hypo.chimp
2	39860047	39860065	2	cg22354234,cg20224517	TSS200;TSS200,TSS200;TSS200	S_Shore,S_Shore	THUMPD2;THUMPD2,THUMPD2;THUMPD2	NM_025264;NR_028102,NM_025264;NR_028102	hyper.chimp
2	42573007	42573182	2	cg08398288,cg21129729	Body;Body,Body;Body	N_Shore,N_Shore	KCNG3;KCNG3,KCNG3;KCNG3	NM_133329;NM_172344,NM_133329;NM_172344	hypo.chimp
2	43304469	43304812	2	cg00968638,cg09983326	3UTR,3UTR	N_Shore,N_Shore	ZFP36L2,ZFP36L2	NM_006887,NM_006887	hypo.chimp
2	43756731	43757515	7	cg17110364,cg09325404,cg11267669,cg14230606,cg09132607,cg20563666,cg08726338	Body;1stExon,Body;TSS200,Body;TSS200,Body;TSS200,Body;TSS200,Body;TSS1500,Body;TSS1500	_,_	PLEKHH2;LOC728819,PLEKHH2;LOC728819,PLEKHH2;LOC728819,PLEKHH2;LOC728819,PLEKHH2;LOC728819,PLEKHH2;LOC728819,PLEKHH2;LOC728819	NM_172069;NM_001101330,NM_172069;NM_001101330,NM_172069;NM_001101330,NM_172069;NM_001101330,NM_172069;NM_001101330,NM_172069;NM_001101330,NM_172069;NM_001101330	hypo.chimp
2	43912270	43912770	4	cg13591352,cg14583675,cg18303215,cg15889012	Body,Body,Body,Body	Island,Island,Island,S_Shore	ABCG5,ABCG5,ABCG5,ABCG5	NM_022436,NM_022436,NM_022436,NM_022436	hyper.chimp
2	44248323	44248508	2	cg08134877,cg04920474	TSS1500;TSS1500;TSS1500;TSS1500;TSS1500,TSS1500;TSS1500;TSS1500;TSS1500;TSS1500	N_Shore,Island	PPM1B;PPM1B;PPM1B;PPM1B;PPM1B,PPM1B;PPM1B;PPM1B;PPM1B;PPM1B	NM_001033556;NM_001033557;NM_002706;NM_177969;NM_177968,NM_001033556;NM_001033557;NM_002706;NM_177969;NM_177968	hyper.chimp
2	45251540	45251885	3	cg16619576,cg26779985,cg01572940	_,_	Island,S_Shore,S_Shore	_,_	_,_	hyper.chimp
2	45723742	45724275	2	cg01002570,cg05208381	_,_	N_Shore,Island	_,_	_,_	hyper.chimp
2	47652669	47652909	3	cg04943225,cg14758072,cg10903274	_,_	Island,S_Shore,S_Shore	_,_	_,_	hypo.chimp
2	54789424	54790326	4	cg20454887,cg04181892,cg16642520,cg25122629	_,_	_,_	_,_	_,_	hyper.chimp
2	54803560	54803966	2	cg14709837,cg00261430	_,_	N_Shore,Island	_,_	_,_	hyper.chimp
2	55214503	55214814	2	cg05267204,cg06719604	_,_	_,_	_,_	_,_	hyper.chimp
2	55311926	55312198	2	cg25477606,cg02717117	5UTR;TSS1500;TSS1500;5UTR,5UTR;TSS1500;TSS1500;5UTR	_,_	C2orf63;RPS27A;RPS27A;C2orf63,C2orf63;RPS27A;RPS27A;C2orf63	NM_152385;NM_001135592;NM_002954;NM_001135598,NM_152385;NM_001135592;NM_002954;NM_001135598	hypo.chimp
2	55362609	55362654	2	cg02642298,cg11444607	TSS1500,TSS1500	N_Shore,N_Shore	PRDXDD1P,PRDXDD1P	NR_027258,NR_027258	hyper.chimp
2	55599578	55599832	3	cg04842553,cg23192899,cg13460980	TSS1500,TSS1500,TSS1500	N_Shore,N_Shore,N_Shore	CCDC104,CCDC104,CCDC104	NM_080667,NM_080667,NM_080667	hyper.chimp
2	56263618	56263804	4	cg21995038,cg08456247,cg03896589,cg17611074	TSS1500,TSS1500,TSS1500,TSS1500	N_Shore,N_Shore,N_Shore,N_Shore	CCDC85A,CCDC85A,CCDC85A,CCDC85A	NM_001080433,NM_001080433,NM_001080433,NM_001080433	hypo.chimp
2	58332200	58332248	3	cg03607916,cg25724323,cg09026213	_,_	N_Shore,Island,Island	_,_	_,_	hypo.chimp
2	60534134	60534265	2	cg22445742,cg15241316	Body;Body,Body;Body	_,_	BCL11A;BCL11A,BCL11A;BCL11A	NM_138559;NM_018014,NM_138559;NM_018014	hypo.chimp
2	64938747	64939268	2	cg10017626,cg00810971	_,_	N_Shore,N_Shore	_,_	_,_	hypo.chimp
2	69468449	69468622	3	cg25195673,cg07591442,cg14476487	TSS1500,TSS1500,TSS1500	S_Shore,S_Shore,S_Shore	GFPT1,GFPT1,GFPT1	NM_002056,NM_002056,NM_002056	hypo.chimp
2	70029330	70029797	2	cg18847009,cg22117468	_,_	_,_	_,_	_,_	hypo.chimp
2	70971800	70972331	2	cg07457305,cg13607218	_,_	S_Shore,S_Shelf	_,_	_,_	hyper.chimp
2	71057909	71058907	3	cg27665449,cg04737087,cg05472974	TSS1500;TSS1500,TSS1500;TSS1500,TSS200;TSS200	N_Shore,N_Shore,N_Shore	ANKRD53;ANKRD53,ANKRD53;ANKRD53,ANKRD53;ANKRD53	NM_001115116;NM_024933,NM_001115116;NM_024933,NM_001115116;NM_024933	hyper.chimp
2	71076033	71076064	2	cg07603744,cg23731591	TSS1500,TSS1500	S_Shore,S_Shore	TEX261,TEX261	NM_144582,NM_144582	hyper.chimp
2	71932784	71933117	4	cg07258910,cg21513009,cg25705148,cg01361021	_,_	N_Shore,N_Shore,Island,Island	_,_	_,_	hyper.chimp
2	73723024	73723474	2	cg21376120,cg19565262	5UTR;1stExon,TSS1500	_,_	NAT8;NAT8,NAT8	NM_003960;NM_003960,NM_003960
2	73973600	73973782	2	cg12039197,cg23173910	1stExon;5UTR,5UTR	_,_	ACTG2;ACTG2,ACTG2	NM_001615;NM_001615,NM_001615
2	74006594	74006825	4	cg08971637,cg02478828,cg19752861,cg01629435	TSS1500;TSS1500,TSS1500;TSS1500,TSS1500;TSS1500,TSS1500;TSS1500	N_Shore,N_Shore,N_Shore,N_Shore	DGUOK;DGUOK,DGUOK;DGUOK,DGUOK;DGUOK,DGUOK;DGUOK	NM_080916;NM_080918,NM_080916;NM_080918,NM_080916;NM_080918,NM_080916;NM_080918
2	74636547	74636596	2	cg22989958,cg11800635	Body,Body	S_Shore,S_Shore	DOK1,DOK1	NM_001381,NM_001381
2	75279844	75279875	2	cg11348389,cg15584401	1stExon;1stExon;5UTR;5UTR,1stExon;1stExon;5UTR;5UTR	N_Shore,N_Shore	TACR1;TACR1;TACR1;TACR1,TACR1;TACR1;TACR1;TACR1	NM_001058;NM_015727;NM_015727;NM_001058,NM_001058;NM_015727;NM_015727;NM_001058
2	84987392	84987979	2	cg04797170,cg15034300	_,_	S_Shore,S_Shore	_,_	_,_
2	86869324	86869947	2	cg24345747,cg07152196	Body;Body;Body;Body,Body;Body;Body;Body	N_Shore,Island	CD8A;CD8A;CD8A;CD8A,CD8A;CD8A;CD8A;CD8A	NM_001145873;NM_171827;NM_001768;NR_027353,NM_001145873;NM_171827;NM_001768;NR_027353
2	86872455	86872469	2	cg09318840,cg08506127	TSS200;5UTR;TSS200;TSS200,TSS200;5UTR;TSS200;TSS200	S_Shore,S_Shore	CD8A;CD8A;CD8A;CD8A,CD8A;CD8A;CD8A;CD8A	NR_027353;NM_001145873;NM_171827;NM_001768,NR_027353;NM_001145873;NM_171827;NM_001768
2	88251928	88251988	2	cg04051697,cg10317387	5UTR,5UTR	S_Shore,S_Shore	THNSL2,THNSL2	NM_018271,NM_018271
2	89804121	89804657	2	cg27147762,cg06192818	_,_	_,_	_,_	_,_
2	96303284	96304011	2	ch.2.2007613R,cg00336220	3UTR,3UTR	_,_	CIAO1,SNRNP200	NM_004804,NM_014014
2	96579516	96579575	2	cg16260241,cg04266887	Body,Body	Island,Island	ARID5A,ARID5A	NM_212481,NM_212481
2	105382171	105382689	5	cg06639320,cg22454769,cg13754437,cg19025700,cg03136099	TSS200;TSS200;5UTR;TSS200,TSS200;TSS200;5UTR;TSS200,TSS1500;5UTR;TSS1500;TSS1500,TSS1500;5UTR;TSS1500;TSS1500,TSS1500;5UTR;TSS1500;TSS1500	Island,Island,S_Shore,S_Shore,S_Shore	FHL2;FHL2;FHL2;FHL2,FHL2;FHL2;FHL2;FHL2,FHL2;FHL2;FHL2;FHL2,FHL2;FHL2;FHL2;FHL2,FHL2;FHL2;FHL2;FHL2	NM_001039492;NM_001450;NM_201557;NM_201555,NM_001039492;NM_001450;NM_201557;NM_201555,NM_201555;NM_201557;NM_001450;NM_001039492,NM_201555;NM_201557;NM_001450;NM_001039492,NM_201555;NM_201557;NM_001450;NM_001039492	hypo.chimp
2	73818276	73818280	2	cg22338307,cg00762659	TSS1500,TSS1500	S_Shore,S_Shore	TPRKB,TPRKB	NM_016058,NM_016058	hyper.chimp
2	75791781	75791797	2	cg20704342,cg23051299	TSS200,TSS200	S_Shore,S_Shore	C2orf3,C2orf3	NM_003203,NM_003203	hyper.chimp
2	80403484	80403630	2	cg01146063,cg10579530	Body;Body,Body;Body	S_Shore,S_Shore	CTNNA2;CTNNA2,CTNNA2;CTNNA2	NM_004389;NM_001164883,NM_004389;NM_001164883	hyper.chimp
2	80404924	80405323	2	cg14754187,cg25237113	Body;Body,Body;Body	S_Shore,S_Shelf	CTNNA2;CTNNA2,CTNNA2;CTNNA2	NM_004389;NM_001164883,NM_004389;NM_001164883	hyper.chimp
2	85006884	85007439	2	cg14899357,cg09133363	_,_	_,_	_,_	_,_	hyper.chimp
2	85434889	85435869	4	cg16791210,cg00014085,cg08950745,cg13145437	TSS1500;TSS1500;TSS1500;Body;TSS1500,TSS1500;TSS1500;TSS1500;TSS1500;1stExon,5UTR;5UTR;5UTR;TSS1500;5UTR,5UTR;5UTR;5UTR;TSS1500;5UTR	N_Shore,N_Shore,S_Shore,S_Shore	ELMOD3;ELMOD3;ELMOD3;RETSAT;ELMOD3,ELMOD3;ELMOD3;ELMOD3;ELMOD3;RETSAT,ELMOD3;ELMOD3;ELMOD3;RETSAT;ELMOD3,ELMOD3;ELMOD3;ELMOD3;RETSAT;ELMOD3	NM_001135021;NM_001135022;NM_001135023;NM_017750;NM_032213,NM_001135021;NM_001135022;NM_001135023;NM_032213;NM_017750,NM_001135023;NM_032213;NM_001135022;NM_017750;NM_001135021,NM_001135023;NM_032213;NM_001135022;NM_017750;NM_001135021	hyper.chimp
2	85693018	85693233	2	cg23823732,cg24222817	TSS1500,TSS1500	S_Shore,S_Shore	C2orf68,C2orf68	NM_001013649,NM_001013649	hyper.chimp
2	86276623	86276785	2	cg07610327,cg10973622	TSS1500;TSS1500;TSS1500,TSS1500;TSS1500;TSS1500	S_Shore,S_Shore	IMMT;IMMT;IMMT,IMMT;IMMT;IMMT	NM_001100170;NM_001100169;NM_006839,NM_001100170;NM_001100169;NM_006839	hyper.chimp
2	88708729	88708866	2	cg12434364,cg03202477	TSS1500,TSS1500	S_Shore,S_Shore	EIF2AK3,EIF2AK3	NM_004836,NM_004836	hyper.chimp
2	91140049	91141991	7	cg04181327,cg24536249,cg08501265,cg06550232,cg22509113,cg14362697,cg15358235	_,_	N_Shore,N_Shore,Island,Island,Island,Island,S_Shore	_,_	_,_	hyper.chimp
2	91274358	91275790	3	cg21858899,cg05674692,cg26685975	_,_	N_Shore,Island,S_Shore	_,_	_,_	hyper.chimp
2	96335431	96335589	2	cg13140267,cg18419276	TSS1500,TSS1500	S_Shore,S_Shore	SNRNP200,SNRNP200	NM_014014,NM_014014	hyper.chimp
2	96500235	96500456	3	cg27553926,cg04706655,cg14984341	_,_	_,_	_,_	_,_	hyper.chimp
2	96537440	96537631	4	cg07936672,cg13556639,cg21482745,cg05675316	Body,Body,TSS200,TSS200	N_Shore,N_Shore,Island,Island	NEURL3,NEURL3,NEURL3,NEURL3	NR_026875,NR_026875,NR_026875,NR_026875	hyper.chimp
2	97124472	97125081	2	cg14798656,cg15176895	TSS200,TSS1500	Island,S_Shore	FAHD2B,FAHD2B	NM_199336,NM_199336	hyper.chimp
2	98294796	98295330	2	cg18360347,cg17915676	Body,3UTR	_,_	VWA3B,VWA3B	NM_144992,NM_144992
2	98805965	98806429	4	cg19043574,cg20666917,cg11636504,cg08517455	Body,Body,Body,Body	Island,Island,Island,S_Shore	C2orf55,C2orf55,C2orf55,C2orf55	NM_207362,NM_207362,NM_207362,NM_207362
2	99537290	99537349	2	cg22039234,cg15934776	Body;Body,Body;Body	_,_	AFF3;AFF3,AFF3;AFF3	NM_001025108;NM_002285,NM_001025108;NM_002285
2	102169722	102171008	7	cg15077070,cg22797169,cg14837955,cg08023416,cg13315345,cg01376829,cg00674896	TSS200,TSS200,1stExon;5UTR,5UTR,5UTR,Body,Body	N_Shore,N_Shore,N_Shore,Island,Island,Island,S_Shore	IL1RL2,IL1RL2,IL1RL2;IL1RL2,IL1RL2,IL1RL2,IL1RL2,IL1RL2	NM_003854,NM_003854,NM_003854;NM_003854,NM_003854,NM_003854,NM_003854,NM_003854	hyper.chimp
2	105102049	105102121	2	cg10360071,cg12495283	_,_	_,_	_,_	_,_	hyper.chimp
2	108360743	108360960	4	cg16528895,cg19908768,cg14300730,cg05036173	TSS200,TSS200,TSS200,5UTR;1stExon	_,_	SULT1C4,SULT1C4,SULT1C4,SULT1C4;SULT1C4	NM_006588,NM_006588,NM_006588,NM_006588;NM_006588
2	109730164	109730450	3	cg17866732,cg03552103,cg21537939	TSS1500;TSS1500;1stExon,TSS1500;TSS1500;1stExon,TSS1500;TSS1500;1stExon	Island,Island,Island	SEPT10;SEPT10;ANKRD57,SEPT10;SEPT10;ANKRD57,SEPT10;SEPT10;ANKRD57	NM_144710;NM_178584;NM_023016,NM_144710;NM_178584;NM_023016,NM_144710;NM_178584;NM_023016
2	112612152	112612166	2	cg06024411,cg13886554	TSS1500;TSS1500,TSS1500;TSS1500	N_Shore,N_Shore	FBLN7;FBLN7,FBLN7;FBLN7	NM_001128165;NM_153214,NM_001128165;NM_153214
2	113672726	113672815	2	cg18869127,cg10536276	Body;Body,Body;Body	N_Shore,Island	PSD4;LOC440839,PSD4;LOC440839	NM_012455;NR_029399,NM_012455;NR_029399
2	121061021	121061199	2	cg18989909,cg27114644	_,_	Island,Island	_,_	_,_
2	121184333	121184551	2	cg06388647,cg21151633	_,_	_,_	_,_	_,_
2	121341492	121341678	2	cg26631039,cg21791662	Body,Body	Island,Island	GLI2,GLI2	NM_005270,NM_005270
2	124499713	124499724	2	cg01308258,cg16198087	1stExon,1stExon	Island,Island	CNTNAP5,CNTNAP5	NM_130773,NM_130773
2	127129833	127129839	3	cg17105014,cg08129583,cg25390440	TSS1500;TSS1500,TSS1500;TSS1500,TSS1500;TSS1500	N_Shore,N_Shore,N_Shore	GYPC;GYPC,GYPC;GYPC,GYPC;GYPC	NM_016815;NM_002101,NM_016815;NM_002101,NM_016815;NM_002101
2	128169730	128169915	2	cg25223285,cg11059159	_,_	Island,Island	_,_	_,_
2	129210996	129211028	2	cg10129041,cg03225444	_,_	Island,Island	_,_	_,_
2	130061514	130061825	3	cg05962382,cg05903289,cg19182557	_,_	Island,Island,Island	_,_	_,_
2	130846037	130846938	2	cg20314331,cg12022772	Body;Body,Body;Body	N_Shore,Island	PTPN18;PTPN18,PTPN18;PTPN18	NM_001142370;NM_014369,NM_001142370;NM_014369
2	131200956	131201333	2	cg15305538,cg01164664	_,_	N_Shore,N_Shore	_,_	_,_
2	131898774	131899578	5	cg11925066,cg11003984,cg20148575,cg04921989,cg25442273	_,_	N_Shore,Island,Island,Island,S_Shore	_,_	_,_
2	132275409	132276083	5	cg25953146,cg18782447,cg03747513,cg06193286,cg08026195	5UTR,1stExon;5UTR,1stExon;5UTR,TSS1500,TSS1500	N_Shore,Island,Island,Island,Island	C2orf27B,C2orf27B;C2orf27B,C2orf27B;C2orf27B,C2orf27B,C2orf27B	NM_214461,NM_214461;NM_214461,NM_214461;NM_214461,NM_214461,NM_214461	hyper.chimp
2	108702059	108703101	3	cg08733774,cg02245105,cg23706161	TSS1500,Body,Body	N_Shore,Island,Island	RANBP2,RANBP2,RANBP2	NM_006267,NM_006267,NM_006267	hypo.chimp
2	113121132	113121149	2	cg26703507,cg06121808	Body,Body	S_Shore,S_Shore	SLC20A1,SLC20A1	NM_005415,NM_005415	hypo.chimp
2	114454158	114454200	2	cg26077729,cg27585222	_,_	Island,S_Shore	_,_	_,_	hypo.chimp
2	118332625	118332900	3	cg25619440,cg22762992,cg06940110	_,_	N_Shore,N_Shore,N_Shore	_,_	_,_	hypo.chimp
2	118659311	118659363	2	cg03217115,cg27637303	_,_	N_Shore,N_Shore	_,_	_,_	hypo.chimp
2	120152509	120152900	2	cg24441810,cg23456409	TSS1500;TSS1500;TSS1500,TSS1500;TSS1500;TSS1500	N_Shore,N_Shore	TMEM177;TMEM177;TMEM177,TMEM177;TMEM177;TMEM177	NM_001105198;NM_030577;NM_001105199,NM_001105198;NM_030577;NM_001105199	hypo.chimp
2	121088312	121088534	3	cg11269254,cg23960538,cg01294283	_,_	_,_	_,_	_,_	hypo.chimp
2	121149544	121149640	2	cg09610018,cg12736501	_,_	_,_	_,_	_,_	hypo.chimp
2	130806396	130806519	3	cg15123104,cg18743464,cg26638005	_,_	_,_	_,_	_,_	hypo.chimp
2	133060088	133060127	3	cg17172683,cg11552903,cg18444763	Body,Body,Body	S_Shore,S_Shore,S_Shore	GPR39,GPR39,GPR39	NM_001508,NM_001508,NM_001508	hypo.chimp
2	134502158	134502245	2	cg20512501,cg05146544	_,_	Island,Island	_,_	_,_	hyper.chimp
2	136459930	136460168	3	cg18110444,cg27218212,cg14778622	TSS1500,TSS1500,TSS1500	Island,Island,S_Shore	DARS,DARS,DARS	NM_001349,NM_001349,NM_001349	hypo.chimp
2	138975210	138975214	2	cg03782584,cg10095539	TSS1500,TSS1500	N_Shore,N_Shore	SPOPL,SPOPL	NM_001001664,NM_001001664	hypo.chimp
2	144807284	144807326	2	cg07780074,cg08027199	TSS1500,TSS1500	S_Shore,S_Shore	GTDC1,GTDC1	NM_001164629,NM_001164629	hyper.chimp
2	144863761	144864028	3	cg11299873,cg00025331,cg09398544	Body;Body,Body;Body,Body;Body	Island,Island,S_Shore	ZEB2;ZEB2,ZEB2;ZEB2,ZEB2;ZEB2	NM_014795;NM_001171653,NM_014795;NM_001171653,NM_014795;NM_001171653	hyper.chimp
2	152971534	152972331	2	cg00059089,cg07298347	Body,Body	_,_	FMNL2,FMNL2	NM_052905,NM_052905	hypo.chimp
2	153851923	153852014	2	cg07563363,cg18771570	_,_	_,_	_,_	_,_	hyper.chimp
2	157821717	157822315	2	cg23728060,cg06240690	TSS1500,TSS1500	_,_	GALNT5,GALNT5	NM_014568,NM_014568	hypo.chimp
2	159360059	159360164	2	cg21992932,cg09357934	TSS200,1stExon	_,_	DAPL1,DAPL1	NM_001017920,NM_001017920	hyper.chimp
2	160362332	160363327	3	cg04735129,cg03432176,cg09643312	Body,TSS1500,TSS1500	N_Shore,S_Shore,S_Shore	CD302,CD302,CD302	NM_014880,NM_014880,NM_014880	hypo.chimp
2	160469490	160469868	7	cg02280532,cg18514922,cg00268019,cg14819504,cg01092293,cg10107725,cg15026998	5UTR;1stExon,TSS200,TSS200,TSS200,TSS200,TSS1500,TSS1500	Island,Island,Island,Island,Island,S_Shore,S_Shore	LY75;LY75,LY75,LY75,LY75,LY75,LY75,LY75	NM_002349;NM_002349,NM_002349,NM_002349,NM_002349,NM_002349,NM_002349,NM_002349
2	160835709	160836073	2	cg00897796,cg14258877	_,_	S_Shore,S_Shore	_,_	_,_
2	162883137	162883142	2	cg00531628,cg07348311	5UTR;1stExon,5UTR;1stExon	_,_	IFIH1;IFIH1,IFIH1;IFIH1	NM_022168;NM_022168,NM_022168;NM_022168
2	165187199	165187396	2	cg10508783,cg20886011	TSS1500,TSS1500	S_Shore,S_Shore	GRB14,GRB14	NM_004490,NM_004490
2	166358852	166359621	11	cg15307891,cg25799994,cg22280705,cg05569109,cg24678095,cg24217704,cg10830649,cg13169065,cg20146030,cg25492645,cg02764346	5UTR;1stExon,5UTR;1stExon,5UTR;1stExon,TSS200,TSS200,TSS200,TSS200,TSS200,TSS200,TSS1500,TSS1500	Island,Island,Island,Island,Island,Island,Island,Island,Island,S_Shore,S_Shore	GALNT3;GALNT3,GALNT3;GALNT3,GALNT3;GALNT3,GALNT3,GALNT3,GALNT3,GALNT3,GALNT3,GALNT3,GALNT3,GALNT3	NM_004482;NM_004482,NM_004482;NM_004482,NM_004482;NM_004482,NM_004482,NM_004482,NM_004482,NM_004482,NM_004482,NM_004482,NM_004482,NM_004482	hyper.chimp
2	162072449	162072510	2	cg03687084,cg24695950	_,_	_,_	_,_	_,_	hypo.chimp
2	167175325	167175551	2	cg17591219,cg07297242	_,_	_,_	_,_	_,_	hyper.chimp
2	169366672	169367238	2	cg07116337,cg16960758	5UTR;TSS1500;TSS1500;TSS1500,5UTR;TSS200;TSS200;TSS200	_,_	NOSTRIN;NOSTRIN;NOSTRIN;NOSTRIN,NOSTRIN;NOSTRIN;NOSTRIN;NOSTRIN	NM_001171631;NM_001039724;NM_052946;NM_001171632,NM_001171631;NM_052946;NM_001171632;NM_001039724	hypo.chimp
2	170043969	170044140	3	cg04064028,cg17792658,cg10536369	TSS1500,TSS1500,TSS200	N_Shore,N_Shore,Island	BBS5,BBS5,BBS5	NM_152384,NM_152384,NM_152384	hypo.chimp
2	171277433	171277627	2	cg22699676,cg08386537	Body,Body	N_Shore,N_Shore	LOC440925,LOC440925	NR_027433,NR_027433	hypo.chimp
2	171538560	171539031	3	cg11422521,cg00677479,cg20200080	_,_	Island,Island,S_Shore	_,_	_,_	hyper.chimp
2	172652016	172652639	2	cg06924873,cg03654166	Body,Body	N_Shore,N_Shore	MAP1D,MAP1D	NM_199227,NM_199227	hyper.chimp
2	176645054	176646217	5	cg17835961,cg23429510,cg24798398,cg25180342,cg07694390	_,_	Island,S_Shore,S_Shore,S_Shore,S_Shore	_,_	_,_	hypo.chimp
2	176685531	176686019	3	cg09615505,cg12504882,cg02164225	_,_	Island,Island,S_Shore	_,_	_,_	hypo.chimp
2	176689668	176690588	4	cg25371634,cg02249732,cg10125317,cg25953239	TSS200,1stExon,1stExon,Body	Island,Island,Island,Island	HOXD10,HOXD10,HOXD10,HOXD10	NM_002148,NM_002148,NM_002148,NM_002148	hypo.chimp
2	176693420	176694272	3	cg07460010,cg02164574,cg23068499	_,TSS1500	N_Shore,N_Shore,N_Shore	_,HOXD9	_,NM_014213	hypo.chimp
2	176697595	176697832	3	cg09173768,cg10753836,cg19373813	3UTR,3UTR,3UTR	Island,Island,Island	HOXD9,HOXD9,HOXD9	NM_014213,NM_014213,NM_014213
2	198088429	198088629	5	cg10972865,cg19965941,cg22969808,cg26641578,cg04056179	TSS200;TSS1500;TSS1500,TSS200;TSS1500;TSS1500,TSS200;TSS1500;TSS1500,TSS200;TSS1500;TSS1500,5UTR;1stExon;TSS1500;TSS1500	N_Shore,N_Shore,N_Shore,N_Shore,N_Shore	MOBKL3;MOBKL3;MOBKL3,MOBKL3;MOBKL3;MOBKL3,MOBKL3;MOBKL3;MOBKL3,MOBKL3;MOBKL3;MOBKL3,MOBKL3;MOBKL3;MOBKL3;MOBKL3	NM_199482;NM_001100819;NM_015387,NM_199482;NM_001100819;NM_015387,NM_199482;NM_001100819;NM_015387,NM_199482;NM_001100819;NM_015387,NM_199482;NM_199482;NM_001100819;NM_015387	hypo.chimp
2	177063318	177063623	3	cg13295262,cg10456121,cg15303382	_,_	Island,Island,Island	_,_	_,_	hyper.chimp
2	177126807	177127151	2	cg23561606,cg02284625	_,_	_,_	_,_	_,_	hyper.chimp
2	178126206	178126299	3	cg19255475,cg03700679,cg09773436	TSS1500,TSS1500,TSS1500	Island,S_Shore,S_Shore	TTC30B,TTC30B,TTC30B	NM_152517,NM_152517,NM_152517	hyper.chimp
2	178192202	178192304	2	cg11115143,cg11237792	TSS1500,TSS1500	S_Shore,S_Shore	TTC30A,TTC30A	NM_152275,NM_152275	hyper.chimp
2	179096099	179096310	2	cg04220104,cg17740434	Body,Body	_,_	MIR548N,MIR548N	NR_031666,NR_031666	hyper.chimp
2	182029599	182030031	3	cg05246303,cg25515269,cg25652029	TSS1500,TSS1500,5UTR;1stExon	N_Shore,N_Shore,Island	ITGA4,ITGA4,ITGA4;ITGA4	NM_000885,NM_000885,NM_000885;NM_000885
2	189752749	189753086	5	cg09211763,cg07875385,cg22774472,cg10765212,cg03034070	1stExon;5UTR,1stExon;5UTR,TSS200,TSS200,TSS1500	_,_	COL5A2;COL5A2,COL5A2;COL5A2,COL5A2,COL5A2,COL5A2	NM_000393;NM_000393,NM_000393;NM_000393,NM_000393,NM_000393,NM_000393
2	197737386	197737577	3	cg26132737,cg09496748,cg07683388	Body,Body,Body	Island,Island,Island	ANKRD44,ANKRD44,ANKRD44	NM_153697,NM_153697,NM_153697
2	201690059	201690265	4	cg21012647,cg07476617,cg09643151,cg02829456	5UTR;5UTR,5UTR;5UTR,5UTR;5UTR,5UTR;TSS1500;5UTR	N_Shore,N_Shore,N_Shore,N_Shore	CFLAR;CFLAR,CFLAR;CFLAR,CFLAR;CFLAR,CFLAR;CFLAR;CFLAR	NM_001127184;NM_003879,NM_001127184;NM_003879,NM_001127184;NM_003879,NM_001127184;NM_001127183;NM_003879
2	202354180	202354651	2	cg06538660,cg01813165	TSS200;TSS200,TSS1500;TSS1500	Island,S_Shore	ALS2;ALS2,ALS2;ALS2	NM_020919;NM_001135745,NM_001135745;NM_020919
2	210151556	210152399	2	cg15310568,cg10562586	TSS1500;TSS1500;TSS1500;5UTR,TSS1500;TSS1500;TSS1500;5UTR	_,_	MAP2;MAP2;MAP2;MAP2,MAP2;MAP2;MAP2;MAP2	NM_031847;NM_031845;NM_002374;NM_001039538,NM_031847;NM_031845;NM_002374;NM_001039538
2	214983299	214984218	2	cg18859776,cg10181281	3UTR;TSS1500,TSS1500	_,_	SPAG16;VWC2L,VWC2L	NM_024532;NM_001080500,NM_001080500	hyper.chimp
2	201688749	201689112	2	cg18119407,cg16952751	TSS1500;TSS1500,5UTR;TSS200;1stExon	N_Shore,N_Shore	CFLAR;CFLAR,CFLAR;CFLAR;CFLAR	NM_001127184;NM_003879,NM_001127184;NM_003879;NM_001127184
2	206260089	206260232	2	cg19795793,cg02183001	Body;Body;Body;Body;Body;Body,Body;Body;Body;Body;Body;Body	S_Shore,S_Shore	NRP2;NRP2;NRP2;NRP2;NRP2;NRP2,NRP2;NRP2;NRP2;NRP2;NRP2;NRP2	NM_201279;NM_018534;NM_201264;NM_201267;NM_003872;NM_201266,NM_201279;NM_018534;NM_201264;NM_201267;NM_003872;NM_201266
2	215383674	215383882	2	cg24715680,cg24607575	TSS1500,TSS1500	S_Shore,S_Shore	BARD1,BARD1	NM_000465,NM_000465
2	219180851	219180968	2	cg17980119,cg27369013	TSS200,1stExon;5UTR	_,_	PLCD4,PLCD4;PLCD4	NM_032726,NM_032726;NM_032726	hypo.chimp
2	215884712	215885548	3	cg02319613,cg01280080,cg06525280	TSS1500,Body,Body	N_Shore,S_Shore,S_Shore	ATIC,ATIC,ATIC	NM_004044,NM_004044,NM_004044	hyper.chimp
2	218606736	218607033	4	cg00122854,cg12924402,cg03832522,cg23940612	_,_	Island,Island,Island,Island	_,_	_,_	hyper.chimp
2	219533500	219534389	3	cg16831573,cg12156672,cg08724891	1stExon,3UTR;1stExon,3UTR;1stExon	Island,Island,N_Shore	CDK5R2,CDK5R2;CDK5R2,CDK5R2;CDK5R2	NM_003936,NM_003936;NM_003936,NM_003936;NM_003936	hypo.chimp
2	219567414	219567939	2	cg15780540,cg16938613	TSS1500;TSS1500;TSS1500,_	N_Shore,N_Shore	CRYBA2;CRYBA2;CRYBA2,_	NM_057094;NM_005209;NM_057093,_	hypo.chimp
2	219732850	219732974	2	cg08530484,cg11765003	5UTR,5UTR	N_Shore,N_Shore	NHEJ1,NHEJ1	NM_024782,NM_024782	hypo.chimp
2	219961897	219962207	4	cg21531689,cg00244308,cg22888752,cg27482168	TSS1500,TSS1500,TSS1500,TSS1500	S_Shore,S_Shore,S_Shore,S_Shore	DNPEP,DNPEP,DNPEP,DNPEP	NM_012100,NM_012100,NM_012100,NM_012100	hypo.chimp
2	220056556	220057361	5	cg27252970,cg18131810,cg11841522,cg00495988,cg15415787	Body,Body,Body,Body,Body	N_Shore,N_Shore,N_Shore,N_Shore,Island	SPEG,SPEG,SPEG,SPEG,SPEG	NM_005876,NM_005876,NM_005876,NM_005876,NM_005876	hyper.chimp
2	220058811	220059284	2	cg06351981,cg02557933	Body,Body	S_Shore,S_Shore	SPEG,SPEG	NM_005876,NM_005876	hyper.chimp
2	220069061	220070486	6	cg00680696,cg11361344,cg16918905,cg08801795,cg12458485,cg19930135	_,TSS1500,TSS1500;TSS1500	N_Shore,Island,Island,Island,Island,Island	_,GMPPA,GMPPA;GMPPA	_,NM_013335,NM_013335;NM_205847	hyper.chimp
2	220111015	220111102	2	cg02197228,cg26142972	3UTR;3UTR,3UTR;3UTR	N_Shore,N_Shore	ACCN4;ACCN4,ACCN4;ACCN4	NM_018674;NM_182847,NM_018674;NM_182847	hyper.chimp
2	220126097	220126112	2	cg13782090,cg22212691	Body,Body	Island,Island	OBSL1,OBSL1	NM_015311,NM_015311	hyper.chimp
2	220145138	220145180	3	cg00036871,cg22065526,cg08493959	TSS1500;TSS200,TSS1500;TSS200,TSS1500;TSS200	S_Shore,S_Shore,S_Shore	OBSL1;INHA,OBSL1;INHA,OBSL1;INHA	NM_015311;NM_002191,NM_015311;NM_002191,NM_015311;NM_002191	hypo.chimp
2	222147162	222147222	2	cg02431065,cg08089542	_,_	Island,S_Shore	_,_	_,_	hypo.chimp
2	225015145	225015916	3	cg10193763,cg00754688,cg05299342	_,_	Island,Island,S_Shore	_,_	_,_	hyper.chimp
2	227374043	227374139	3	cg10098888,cg13572511,cg23601397	_,_	S_Shore,S_Shore,S_Shore	_,_	_,_	hyper.chimp
2	229844655	229844754	2	cg02799466,cg06064269	TSS1500;TSS1500,TSS1500;TSS1500	S_Shore,S_Shore	PID1;PID1,PID1;PID1	NM_001100818;NM_017933,NM_001100818;NM_017933	hyper.chimp
2	230493294	230493424	2	cg12048425,cg20959174	5UTR,5UTR	N_Shore,N_Shore	TRIP12,TRIP12	NM_004238,NM_004238	hypo.chimp
2	231423206	231423239	2	cg08917299,cg19610750	_,_	S_Shore,S_Shelf	_,_	_,_	hyper.chimp
2	231437211	231437221	2	cg22177286,cg20333027	TSS1500;TSS1500;TSS1500,TSS1500;TSS1500;TSS1500	N_Shore,N_Shore	ITM2C;ITM2C;ITM2C,ITM2C;ITM2C;ITM2C	NM_030926;NM_001012516;NM_001012514,NM_030926;NM_001012516;NM_001012514	hypo.chimp
2	231763752	231763825	2	cg07929768,cg27383418	_,_	_,_	_,_	_,_	hyper.chimp
2	231966256	231966607	2	cg09494379,cg24172324	_,_	N_Shelf,N_Shore	_,_	_,_	hypo.chimp
2	231967675	231968360	3	cg09004241,cg04286697,cg20954977	TSS1500,TSS1500,TSS1500	N_Shore,N_Shore,Island	B3GNT7,B3GNT7,B3GNT7	NM_145236,NM_145236,NM_145236	hyper.chimp
2	232102946	232103140	2	cg00143376,cg02204630	Body,Body	N_Shore,Island	NMUR1,NMUR1	NM_006056,NM_006056	hyper.chimp
2	232216018	232216086	2	cg10318368,cg17490196	_,_	_,_	_,_	_,_	hypo.chimp
2	232500208	232500259	2	cg07935340,cg22708248	TSS1500,TSS1500	Island,Island	NPPC,NPPC	NM_024409,NM_024409	hyper.chimp
2	232925720	232925861	2	cg18676967,cg25274275	_,_	Island,S_Shore	_,_	_,_	hyper.chimp
2	232958815	232960950	6	cg08690379,cg00706683,cg13138089,cg02812891,cg25560398,cg17204652	Body,Body,TSS200,TSS200,TSS1500,TSS1500	N_Shore,N_Shore,Island,Island,Island,Island	ECEL1P2,ECEL1P2,ECEL1P2,ECEL1P2,ECEL1P2,ECEL1P2	NR_028501,NR_028501,NR_028501,NR_028501,NR_028501,NR_028501	hypo.chimp
2	233059397	233060165	3	cg25317941,cg07503630,cg01228134	Body,5UTR,5UTR	Island,Island,Island	ECEL1,ECEL1,ECEL1	NM_004826,NM_004826,NM_004826	hypo.chimp
2	234024393	234024522	3	cg11612905,cg20300794,cg05711037	Body;Body,Body;Body,Body;Body	_,_	DGKD;DGKD,DGKD;DGKD,DGKD;DGKD	NM_152879;NM_003648,NM_152879;NM_003648,NM_152879;NM_003648	hypo.chimp
2	235067880	235067957	2	cg05204104,cg15016771	3UTR;1stExon,3UTR;1stExon	N_Shore,N_Shore	ARL4C;ARL4C,ARL4C;ARL4C	NM_005737;NM_005737,NM_005737;NM_005737	hypo.chimp
2	235366087	235366119	2	cg10021633,cg14330516	_,_	_,_	_,_	_,_	hyper.chimp
2	235524054	235524380	3	cg13904006,cg08036121,cg27024844	TSS1500,TSS1500,TSS1500	N_Shore,N_Shore,N_Shore	SH3BP4,SH3BP4,SH3BP4	NM_014521,NM_014521,NM_014521	hypo.chimp
2	236066416	236066539	2	cg26176204,cg24768561	TSS1500;TSS1500,TSS1500;TSS1500	N_Shore,Island	AGAP1;AGAP1,AGAP1;AGAP1	NM_014914;NM_001037131,NM_014914;NM_001037131	hypo.chimp
2	236437999	236438903	3	cg02244583,cg19761110,cg03785646	Body;Body,Body;Body,Body;Body	N_Shore,Island,S_Shore	AGAP1;AGAP1,AGAP1;AGAP1,AGAP1;AGAP1	NM_014914;NM_001037131,NM_014914;NM_001037131,NM_014914;NM_001037131	hypo.chimp
2	236477660	236477685	2	cg00340052,cg14015561	Body;Body,Body;Body	_,_	AGAP1;AGAP1,AGAP1;AGAP1	NM_014914;NM_001037131,NM_014914;NM_001037131	hypo.chimp
2	236588061	236589049	5	cg14226755,cg11007962,cg20128773,cg14895183,cg26641996	Body;Body,Body;Body,Body;Body,Body;Body,Body;Body	_,_	AGAP1;AGAP1,AGAP1;AGAP1,AGAP1;AGAP1,AGAP1;AGAP1,AGAP1;AGAP1	NM_014914;NM_001037131,NM_014914;NM_001037131,NM_014914;NM_001037131,NM_014914;NM_001037131,NM_014914;NM_001037131	hyper.chimp
2	238164203	238165064	6	cg01157280,cg16266494,cg04044224,cg12935818,cg06353069,cg10458446	1stExon;5UTR,TSS200,TSS200,TSS200,TSS1500,TSS1500	_,_	RAB17;RAB17,RAB17,RAB17,RAB17,RAB17,RAB17	NM_022449;NM_022449,NM_022449,NM_022449,NM_022449,NM_022449,NM_022449
2	238529274	238529698	3	cg10403784,cg10429608,cg27051315	_,_	Island,Island,Island	_,_	_,_
2	238736938	238737829	3	cg03682366,cg11120927,cg10310682	_,_	Island,Island,Island	_,_	_,_
2	240724685	240725089	9	cg12629245,cg25823214,cg19638398,cg13749477,cg22062537,cg20783424,cg19757382,cg26154534,cg17342071	TSS1500;TSS1500,TSS1500;TSS1500,TSS1500;TSS1500,TSS1500;TSS1500,TSS1500;TSS1500,TSS1500;TSS1500,TSS1500;TSS1500,TSS1500;TSS1500,TSS1500;TSS1500	S_Shore,S_Shore,S_Shore,S_Shore,S_Shore,S_Shore,S_Shore,S_Shore,S_Shore	MYEOV2;MYEOV2,MYEOV2;MYEOV2,MYEOV2;MYEOV2,MYEOV2;MYEOV2,MYEOV2;MYEOV2,MYEOV2;MYEOV2,MYEOV2;MYEOV2,MYEOV2;MYEOV2,MYEOV2;MYEOV2	NM_138336;NM_001163424,NM_138336;NM_001163424,NM_138336;NM_001163424,NM_138336;NM_001163424,NM_138336;NM_001163424,NM_138336;NM_001163424,NM_138336;NM_001163424,NM_138336;NM_001163424,NM_138336;NM_001163424
2	241043854	241044351	4	cg13232118,cg17367832,cg06591185,cg12561497	TSS1500;Body;Body,TSS200;Body;Body,TSS200;Body;Body,Body;Body	N_Shore,Island,Island,Island	MIR149;PP14571;GPC1,MIR149;PP14571;GPC1,MIR149;PP14571;GPC1,PP14571;GPC1	NR_029702;NR_024014;NM_002081,NR_029702;NR_024014;NM_002081,NR_029702;NR_024014;NM_002081,NR_024014;NM_002081
2	241046102	241046159	2	cg25446612,cg08485186	TSS1500;Body,TSS1500;Body	S_Shore,S_Shore	PP14571;GPC1,PP14571;GPC1	NR_024014;NM_002081,NR_024014;NM_002081
2	241108311	241108675	2	cg06476685,cg03743720	Body;Body,Body;Body	Island,Island	ANKMY1;ANKMY1,ANKMY1;ANKMY1	NM_017844;NM_016552,NM_017844;NM_016552
2	241260604	241260742	3	cg22040202,cg01231921,cg23290121	_,_	Island,Island,Island	_,_	_,_
2	241419713	241420004	2	cg10883069,cg08051575	_,_	N_Shore,N_Shore	_,_	_,_
2	241624917	241625331	2	cg10717312,cg07644939	Body,Body	Island,S_Shore	SNED1,SNED1	NM_001080437,NM_001080437
2	241658186	241658261	2	cg19075225,cg17053285	Body,Body	_,_	SNED1,SNED1	NM_001080437,NM_001080437
2	242391528	242392375	5	cg03584389,cg03462699,cg06402816,cg15346191,cg15909951	Body,Body,Body,3UTR,_	Island,Island,Island,Island,Island	GAL3ST2,GAL3ST2,GAL3ST2,GAL3ST2,_	NM_022134,NM_022134,NM_022134,NM_022134,_	hyper.chimp
2	239967522	239967792	3	cg08177681,cg01647308,cg23949574	5UTR,5UTR,5UTR	_,_	HDAC4,HDAC4,HDAC4	NM_006037,NM_006037,NM_006037
2	240304486	240304562	2	cg02156783,cg03521214	_,_	_,_	_,_	_,_
2	240728439	240728730	2	cg09222115,cg19697911	5UTR,5UTR;1stExon	S_Shelf,_	OTOS,OTOS;OTOS	NM_148961,NM_148961;NM_148961
2	241145733	241146336	2	cg25810938,cg27504117	5UTR;5UTR,TSS1500;TSS1500	Island,N_Shore	ANKMY1;ANKMY1,ANKMY1;ANKMY1	NM_016552;NM_017844,NM_017844;NM_016552
2	241550538	241550735	3	cg14684854,cg14059464,cg02699194	_,_	N_Shelf,N_Shelf,N_Shelf	_,_	_,_
2	241676107	241676193	3	cg24269863,cg21773665,cg19390934	Body;Body;Body;Body,Body;Body;Body;Body,Body;Body;Body;Body	_,_	MTERFD2;SNED1;MTERFD2;MTERFD2,MTERFD2;SNED1;MTERFD2;MTERFD2,MTERFD2;SNED1;MTERFD2;MTERFD2	NR_028050;NM_001080437;NR_028051;NR_028049,NR_028050;NM_001080437;NR_028051;NR_028049,NR_028050;NM_001080437;NR_028051;NR_028049
2	242472943	242473387	3	cg09390137,cg03532030,cg02756915	_,_	S_Shore,S_Shore,S_Shore	_,_	_,_
3	3144441	3144547	2	cg15056751,cg12832129	5UTR,5UTR	S_Shore,S_Shore	TRNT1,TRNT1	NM_182916,NM_182916
3	3196595	3196728	2	cg20787969,cg01892727	TSS1500,TSS1500	Island,S_Shore	CRBN,CRBN	NM_016302,NM_016302
3	5002597	5003143	2	cg01607932,cg18471664	_,_	N_Shore,N_Shore	_,_	_,_
3	9860863	9861198	3	cg25498541,cg02397579,cg07691624	TSS200;TSS200,TSS1500;TSS1500,TSS1500;TSS1500	S_Shore,S_Shore,S_Shore	RPUSD3;RPUSD3,RPUSD3;RPUSD3,RPUSD3;RPUSD3	NM_173659;NM_001142547,NM_001142547;NM_173659,NM_001142547;NM_173659
3	13437496	13437903	2	cg14473743,cg06143615	TSS1500,TSS1500	S_Shore,S_Shore	NUP210,NUP210	NM_024923,NM_024923
3	14313925	14314704	4	cg00329101,cg12497374,cg25457886,cg21139046	_,_	N_Shore,Island,Island,S_Shore	_,_	_,_
3	15349538	15349590	2	cg15145672,cg08359336	TSS1500;5UTR,TSS1500;5UTR	S_Shore,S_Shore	SH3BP5;SH3BP5,SH3BP5;SH3BP5	NM_004844;NM_001018009,NM_004844;NM_001018009
3	16191184	16191219	2	cg13606421,cg10453019	TSS200,5UTR;1stExon	_,_	GALNTL2,GALNTL2;GALNTL2	NM_054110,NM_054110;NM_054110	hypo.chimp
2	242398610	242398775	2	cg18095041,cg11706790	TSS1500;TSS1500,TSS200;TSS200	_,_	NEU4;NEU4,NEU4;NEU4	NM_001167601;NM_001167600,NM_001167600;NM_001167601	hyper.chimp
2	242433789	242433943	3	cg16873443,cg06386983,cg11036279	_,_	N_Shore,N_Shore,N_Shore	_,_	_,_	hyper.chimp
3	8784306	8785077	2	cg15317815,cg12695586	Body,5UTR	Island,Island	OXTR,OXTR	NM_000916,NM_000916
3	9860602	9860722	2	cg10683958,cg08101377	1stExon;1stExon,TSS200;TSS200	Island,Island	RPUSD3;RPUSD3,RPUSD3;RPUSD3	NM_173659;NM_001142547,NM_173659;NM_001142547
3	9950156	9951017	3	cg12419067,cg01274625,cg08614528	Body;TSS1500;TSS1500;TSS1500;Body;Body,5UTR;1stExon;5UTR;5UTR,5UTR;1stExon;5UTR;5UTR	Island,S_Shore,S_Shore	IL17RC;CRELD1;CRELD1;CRELD1;IL17RC;IL17RC,CRELD1;CRELD1;CRELD1;CRELD1,CRELD1;CRELD1;CRELD1;CRELD1	NM_153460;NM_015513;NM_001031717;NM_001077415;NM_153461;NM_032732,NM_001031717;NM_015513;NM_015513;NM_001077415,NM_001031717;NM_015513;NM_015513;NM_001077415
3	12174836	12175427	4	cg00314622,cg25982743,cg10958002,cg10173186	Body;Body;Body,1stExon;Body;Body,1stExon;Body;Body,1stExon;Body;5UTR;Body	N_Shore,Island,Island,Island	SYN2;TIMP4;SYN2,TIMP4;SYN2;SYN2,TIMP4;SYN2;SYN2,TIMP4;SYN2;TIMP4;SYN2	NM_133625;NM_003256;NM_003178,NM_003256;NM_133625;NM_003178,NM_003256;NM_133625;NM_003178,NM_003256;NM_133625;NM_003256;NM_003178	hyper.chimp
3	13035741	13035974	4	cg16182936,cg13878677,cg17696731,cg26766694	Body,Body,Body,Body	_,_	IQSEC1,IQSEC1,IQSEC1,IQSEC1	NM_001134382,NM_001134382,NM_001134382,NM_001134382	hyper.chimp
3	13911528	13911754	2	cg18786782,cg06391982	_,_	Island,Island	_,_	_,_	hyper.chimp
3	15538076	15538153	2	cg10127490,cg19279973	1stExon;1stExon,1stExon;5UTR;1stExon;5UTR	_,_	COLQ;COLQ,COLQ;COLQ;COLQ;COLQ	NM_005677;NM_080539,NM_005677;NM_080539;NM_080539;NM_005677	hyper.chimp
3	16552546	16552730	3	cg25146434,cg11492723,cg06213060	_,_	_,_	_,_	_,_	hyper.chimp
3	19950487	19950742	2	cg02329527,cg08219773	1stExon,TSS200	_,_	EFHB,EFHB	NM_144715,NM_144715	hypo.chimp
3	23821696	23821814	2	cg06282059,cg09560953	TSS1500;TSS1500,TSS1500;TSS1500	N_Shore,N_Shore	UBE2E1;UBE2E1,UBE2E1;UBE2E1	NM_003341;NM_182666,NM_003341;NM_182666	hypo.chimp
3	23827503	23828019	2	cg05654049,cg03668982	Body;Body,Body;Body	Island,S_Shore	UBE2E1;UBE2E1,UBE2E1;UBE2E1	NM_003341;NM_182666,NM_003341;NM_182666	hyper.chimp
3	25444129	25444396	2	cg00371702,cg20899354	TSS1500;TSS1500,TSS1500;TSS1500	_,_	RARB;RARB,RARB;RARB	NM_000965;NM_016152,NM_000965;NM_016152	hyper.chimp
3	30911259	30911535	5	cg03629794,cg04556868,cg16856874,cg24350628,cg02741548	TSS200,TSS200,TSS200,TSS1500,TSS1500	Island,S_Shore,S_Shore,S_Shore,S_Shore	GADL1,GADL1,GADL1,GADL1,GADL1	NM_207359,NM_207359,NM_207359,NM_207359,NM_207359	hyper.chimp
3	35760894	35761034	2	cg24102420,cg23220346	TSS200;Body,Body;Body	_,_	MIR128-2;ARPP-21,MIR128-2;ARPP-21	NR_029824;NM_016300,NR_029824;NM_016300	hyper.chimp
3	36961809	36962044	2	cg17445812,cg10333520	TSS1500,TSS1500	Island,Island	TRANK1,TRANK1	NM_014831,NM_014831	hypo.chimp
3	40474412	40474772	2	cg07387813,cg10374202	Body;Body,Body;Body	S_Shore,S_Shore	RPL14;RPL14,RPL14;RPL14	NM_001034996;NM_003973,NM_001034996;NM_003973	hypo.chimp
3	42280195	42281978	7	cg05785565,cg16415785,cg06631317,cg16864658,cg22934295,cg05471845,cg11142705	5UTR,5UTR,5UTR,5UTR,1stExon;5UTR,TSS200,TSS1500	Island,Island,N_Shore,Island,Island,Island,Island	CCK,CCK,CCK,CCK,CCK;CCK,CCK,CCK	NM_000729,NM_000729,NM_000729,NM_000729,NM_000729;NM_000729,NM_000729,NM_000729
3	42821911	42822048	2	cg01996116,cg01293485	TSS1500;TSS1500;TSS1500,TSS1500;TSS1500;TSS1500	S_Shore,S_Shore	HIGD1A;HIGD1A;HIGD1A,HIGD1A;HIGD1A;HIGD1A	NM_014056;NM_001099668;NM_001099669,NM_014056;NM_001099668;NM_001099669
3	42897355	42897864	2	cg02254876,cg20488820	_,_	Island,Island	_,_	_,_
3	44745900	44746178	7	cg07613233,cg15131977,cg10108389,cg24837680,cg02933119,cg17913259,cg06186861	TSS1500,TSS1500,TSS200,TSS200,TSS200,TSS200,5UTR;1stExon	N_Shore,N_Shore,Island,Island,Island,Island,S_Shore	ZNF501,ZNF501,ZNF501,ZNF501,ZNF501,ZNF501,ZNF501;ZNF501	NM_145044,NM_145044,NM_145044,NM_145044,NM_145044,NM_145044,NM_145044;NM_145044	hyper.chimp
3	43121784	43121840	2	cg00008665,cg07145744	5UTR,5UTR	N_Shore,N_Shore	C3orf39,C3orf39	NM_032806,NM_032806	hypo.chimp
3	44701895	44702199	4	cg24824287,cg24869336,cg08999915,cg24158187	_,_	N_Shore,Island,Island,Island	_,_	_,_	hypo.chimp
3	44777553	44777608	3	cg09053247,cg17546649,cg09333631	TSS1500;Body,TSS1500;Body,TSS1500;Body	N_Shore,N_Shore,N_Shore	KIF15;KIAA1143,KIF15;KIAA1143,KIF15;KIAA1143	NM_020242;NM_020696,NM_020242;NM_020696,NM_020242;NM_020696	hypo.chimp
3	44877937	44878067	2	cg16615211,cg24674304	TSS1500;TSS1500,TSS1500;TSS1500	N_Shore,Island	MIR564;TMEM42,MIR564;TMEM42	NR_030290;NM_144638,NR_030290;NM_144638	hypo.chimp
3	45184191	45184256	2	cg19092164,cg15359249	_,_	_,_	_,_	_,_	hyper.chimp
3	45404746	45405093	2	cg04459086,cg10920302	TSS1500,5UTR;1stExon	N_Shore,Island	LARS2,LARS2;LARS2	NM_015340,NM_015340;NM_015340
3	45858863	45859069	2	cg15061025,cg07561552	TSS1500,TSS1500	Island,S_Shore	LZTFL1,LZTFL1	NM_020347,NM_020347
3	46224799	46225028	3	cg13144783,cg12441928,cg07115110	1stExon;5UTR,TSS200,TSS200	_,_	CCR1;CCR1,CCR1,CCR1	NM_001295;NM_001295,NM_001295,NM_001295	hyper.chimp
3	46481108	46481558	9	cg04910591,cg16975587,cg25930780,cg17527798,cg12295918,cg03933131,cg27314002,cg26307117,cg00716083	Body,Body,Body,TSS200,TSS200,TSS200,TSS200,TSS200,TSS200	N_Shore,Island,Island,Island,S_Shore,S_Shore,S_Shore,S_Shore,S_Shore	LTF,LTF,LTF,LTF,LTF,LTF,LTF,LTF,LTF	NM_002343,NM_002343,NM_002343,NM_002343,NM_002343,NM_002343,NM_002343,NM_002343,NM_002343	hyper.chimp
3	46582969	46583183	3	cg24690946,cg25492569,cg11365440	1stExon;5UTR;5UTR,5UTR;TSS200,5UTR;TSS200	S_Shore,S_Shore,S_Shore	LRRC2;LRRC2;LRRC2,LRRC2;LRRC2,LRRC2;LRRC2	NM_024512;NM_024750;NM_024512,NM_024750;NM_024512,NM_024750;NM_024512	hypo.chimp
3	46593329	46593531	2	cg07225641,cg04145539	5UTR;TSS1500,5UTR;TSS1500	Island,Island	LRRC2;TDGF1,LRRC2;TDGF1	NM_024750;NM_003212,NM_024750;NM_003212	hyper.chimp
3	46862199	46862655	2	cg03838680,cg22951056	_,_	N_Shore,Island	_,_	_,_	hyper.chimp
3	46992718	46993690	2	cg07049905,cg12588041	Body,TSS1500	N_Shore,S_Shore	CCDC12,CCDC12	NM_144716,NM_144716	hyper.chimp
3	47396568	47397462	2	cg05796261,cg19454405	TSS1500,TSS200	N_Shore,Island	PTPN23,PTPN23	NM_015466,NM_015466	hyper.chimp
3	47594045	47594117	2	cg00242358,cg07032164	Body,Body	N_Shore,Island	CSPG5,CSPG5	NM_006574,NM_006574	hypo.chimp
3	47596023	47596131	2	cg24899315,cg15988232	TSS1500,TSS1500	Island,Island	CSPG5,CSPG5	NM_006574,NM_006574	hypo.chimp
3	48257107	48257315	3	cg07515271,cg09359349,cg02212772	TSS1500,TSS1500,TSS1500	N_Shore,N_Shore,N_Shore	ZNF589,ZNF589,ZNF589	NM_016089,NM_016089,NM_016089	hypo.chimp
3	48482169	48482600	2	cg14208102,cg09692335	TSS200;TSS200,5UTR;1stExon;1stExon;5UTR	_,_	TREX1;TREX1,TREX1;TREX1;TREX1;TREX1	NM_016381;NM_033629,NM_033629;NM_016381;NM_033629;NM_016381	hyper.chimp
3	48674094	48674641	2	cg10806820,cg06621358	1stExon,1stExon	Island,Island	CELSR3,CELSR3	NM_001407,NM_001407	hyper.chimp
3	49732474	49732480	2	cg05666287,cg05493761	TSS1500;Body,TSS1500;Body	S_Shore,S_Shore	AMIGO3;RNF123,AMIGO3;RNF123	NM_198722;NM_022064,NM_198722;NM_022064	hypo.chimp
3	49922797	49923433	5	cg00943186,cg22470056,cg25159927,cg13283877,cg15825311	Body;Body,Body;Body,Body;Body,Body;Body,Body;Body	Island,Island,Island,Island,Island	MON1A;MON1A,MON1A;MON1A,MON1A;MON1A,MON1A;MON1A,MON1A;MON1A	NM_032355;NM_001142501,NM_032355;NM_001142501,NM_032355;NM_001142501,NM_032355;NM_001142501,NM_032355;NM_001142501	hypo.chimp
3	49942521	49942717	3	cg03484180,cg21583668,cg21813538	TSS200;TSS200,TSS1500;TSS1500,TSS1500;TSS1500	S_Shore,S_Shore,S_Shore	MON1A;MON1A,MON1A;MON1A,MON1A;MON1A	NM_001142501;NM_032355,NM_001142501;NM_032355,NM_001142501;NM_032355	hyper.chimp
3	50285843	50286013	2	cg22973319,cg22037648	Body;Body,Body;Body	Island,Island	SEMA3B;SEMA3B,SEMA3B;SEMA3B	NM_001005914;NM_004636,NM_001005914;NM_004636	hyper.chimp
3	50287393	50288217	2	cg07629965,cg09811393	Body;Body,Body;Body	N_Shore,Island	SEMA3B;SEMA3B,SEMA3B;SEMA3B	NM_001005914;NM_004636,NM_001005914;NM_004636	hypo.chimp
3	50350487	50350500	2	cg02930432,cg09386807	TSS1500;Body;Body;5UTR,TSS1500;Body;Body;5UTR	Island,Island	RASSF1;RASSF1;RASSF1;RASSF1,RASSF1;RASSF1;RASSF1;RASSF1	NM_170713;NM_170714;NM_007182;NM_170712,NM_170713;NM_170714;NM_007182;NM_170712	hypo.chimp
3	51964732	51964804	2	cg08072716,cg01844642	1stExon,1stExon	N_Shore,Island	GPR62,GPR62	NM_080865,NM_080865	hyper.chimp
3	51983722	51983828	3	cg10630880,cg05541640,cg27563048	TSS200;TSS200;TSS1500;TSS200,TSS200;TSS200;TSS1500;TSS200,TSS200;TSS200;TSS1500;TSS200	N_Shore,N_Shore,N_Shore	ABHD14B;ABHD14B;ABHD14A;ABHD14B,ABHD14B;ABHD14B;ABHD14A;ABHD14B,ABHD14B;ABHD14B;ABHD14A;ABHD14B	NR_027476;NM_032750;NM_015407;NM_001146314,NR_027476;NM_032750;NM_015407;NM_001146314,NR_027476;NM_032750;NM_015407;NM_001146314	hypo.chimp
3	52255728	52255742	2	cg02417408,cg08144943	5UTR;5UTR,5UTR;5UTR	S_Shore,S_Shore	PPM1M;PPM1M,PPM1M;PPM1M	NM_144641;NM_001122870,NM_144641;NM_001122870	hypo.chimp
3	52527633	52528473	5	cg18099408,cg15147215,cg08222913,cg21832537,cg18591801	Body,Body,Body,Body,Body	N_Shore,Island,Island,Island,S_Shore	STAB1,STAB1,STAB1,STAB1,STAB1	NM_015136,NM_015136,NM_015136,NM_015136,NM_015136	hyper.chimp
3	52543363	52544137	2	cg05564831,cg22710716	Body;TSS1500,TSS200;TSS1500	Island,N_Shore	NT5DC2;NT5DC2,NT5DC2;NT5DC2	NM_022908;NM_001134231,NM_022908;NM_001134231	hyper.chimp
3	54132687	54132765	2	cg23537887,cg17563235	Body,Body	S_Shore,S_Shore	CACNA2D3,CACNA2D3	NM_018398,NM_018398	hypo.chimp
3	57069444	57069803	2	cg20749059,cg13745870	5UTR;TSS200,1stExon;5UTR;5UTR	_,_	ARHGEF3;SPATA12,SPATA12;ARHGEF3;SPATA12	NM_001128615;NM_181727,NM_181727;NM_001128615;NM_181727
3	57178350	57179210	3	cg02131639,cg18076124,cg18244601	_,_	N_Shore,N_Shore,Island	_,_	_,_
3	58547560	58547934	2	cg11603443,cg16203594	_,_	Island,Island	_,_	_,_
3	64645499	64645555	2	cg22081832,cg25859972	Body,Body	N_Shore,N_Shore	ADAMTS9,ADAMTS9	NM_182920,NM_182920
3	75750725	75751059	2	cg27328797,cg10226952	_,_	Island,Island	_,_	_,_
3	101018840	101019451	2	cg08539350,cg06062590	Body;TSS1500,Body;1stExon;5UTR	N_Shore,Island	MIR548G;C3orf26,MIR548G;C3orf26;C3orf26	NR_031662;NM_032359,NR_031662;NM_032359;NM_032359	hyper.chimp
3	57209880	57210384	2	cg26870874,cg01410553	TSS1500,TSS1500	_,_	HESX1,HESX1	NM_003865,NM_003865	hypo.chimp
3	57654045	57654078	3	cg03648907,cg14598795,cg13011429	TSS200,TSS1500,TSS1500	S_Shore,S_Shore,S_Shore	FAM116A,FAM116A,FAM116A	NM_152678,NM_152678,NM_152678	hypo.chimp
3	63403627	63403947	3	cg05401575,cg11282156,cg19467202	TSS200;Body,5UTR;Body;1stExon,5UTR;Body;1stExon	_,_	SYNPR;SYNPR,SYNPR;SYNPR;SYNPR,SYNPR;SYNPR;SYNPR	NM_144642;NM_001130003,NM_144642;NM_001130003;NM_144642,NM_144642;NM_001130003;NM_144642	hypo.chimp
3	68136061	68136174	2	cg22706186,cg01709518	TSS200,5UTR;1stExon	N_Shelf,N_Shelf	FAM19A1,FAM19A1;FAM19A1	NM_213609,NM_213609;NM_213609
3	72870984	72871172	2	cg27402429,cg25664220	_,_	Island,S_Shore	_,_	_,_
3	113242700	113242788	2	cg11929898,cg19951107	5UTR;Body,5UTR;Body	_,_	TMPRSS7;TMPRSS7,TMPRSS7;TMPRSS7	NM_001042575;NR_026734,NM_001042575;NR_026734
3	115150430	115150499	2	cg06599594,cg17859426	Body,Body	S_Shore,S_Shore	ZDHHC23,ZDHHC23	NM_173570,NM_173570
3	120374401	120374995	3	cg09554513,cg02019333,cg02741226	TSS1500,TSS1500,TSS200	_,_	UPK1B,UPK1B,UPK1B	NM_006952,NM_006952,NM_006952
3	123096086	123096393	2	cg15066489,cg18636558	1stExon;1stExon,Body;Body	_,_	SLC15A2;SLC15A2,SLC15A2;SLC15A2	NM_001145998;NM_021082,NM_001145998;NM_021082
3	123997319	123997504	2	cg02814805,cg10627428	Body,Body	S_Shore,S_Shore	DIRC2,DIRC2	NM_032839,NM_032839
3	127382783	127382798	2	cg20988073,cg08481491	TSS1500,TSS1500	S_Shore,S_Shore	ALDH1L1,ALDH1L1	NM_012190,NM_012190
3	130228327	130229024	2	cg01601299,cg14511273	Body,Body	N_Shore,Island	CCDC48,CCDC48	NM_024768,NM_024768
3	130795592	130795669	2	cg08471739,cg15504747	Body,Body	_,_	PLXND1,PLXND1	NM_015103,NM_015103
3	130890055	130890234	3	cg07619697,cg09610578,cg05679002	1stExon;Body;Body;5UTR,TSS200;Body;Body,TSS200;Body;Body	_,_	TMCC1;TMCC1;TMCC1;TMCC1,TMCC1;TMCC1;TMCC1,TMCC1;TMCC1;TMCC1	NM_015008;NM_001017395;NM_001128224;NM_015008,NM_015008;NM_001017395;NM_001128224,NM_015008;NM_001017395;NM_001128224	hypo.chimp
3	101461807	101462045	2	cg09439920,cg04730047	TSS1500,TSS1500	N_Shore,N_Shore	TBC1D23,TBC1D23	NM_018309,NM_018309	hyper.chimp
3	110540199	110540254	2	cg12443195,cg18560366	TSS1500,TSS1500	_,_	DPPA4,DPPA4	NM_018189,NM_018189	hyper.chimp
3	120236787	120237066	2	cg06491249,cg06162423	TSS1500;Body,TSS1500;Body	S_Shore,S_Shore	IGSF11;IGSF11,IGSF11;IGSF11	NM_001015887;NM_152538,NM_001015887;NM_152538	hyper.chimp
3	121485982	121487081	6	cg04175809,cg24942922,cg00491927,cg15056966,cg01168235,cg15996342	_,_	N_Shore,N_Shore,N_Shore,N_Shore,Island,Island	_,_	_,_	hyper.chimp
3	121551477	121551551	2	cg24629215,cg00495311	TSS1500,TSS1500	S_Shore,S_Shore	LRRC58,LRRC58	NM_001099678,NM_001099678	hyper.chimp
3	122794817	122794854	2	cg12456825,cg07378309	TSS200,TSS200	_,_	FBXO40,FBXO40	NM_016298,NM_016298	hyper.chimp
3	124123315	124124006	5	cg07297832,cg24925929,cg10783060,cg25439655,cg19141448	Body,Body,Body,Body,Body	N_Shore,Island,Island,Island,Island	SEMA5B,SEMA5B,SEMA5B,SEMA5B,SEMA5B	NM_001031702,NM_001031702,NM_001031702,NM_001031702,NM_001031702	hyper.chimp
3	126797298	126797368	2	cg10588770,cg23487015	TSS1500,TSS1500	Island,S_Shore	OSBPL11,OSBPL11	NM_022776,NM_022776	hyper.chimp
3	127490015	127490253	3	cg03438417,cg11830761,cg13708016	_,_	Island,Island,S_Shore	_,_	_,_	hyper.chimp
3	127725554	127725591	2	cg13844011,cg24901725	TSS1500,TSS1500	Island,Island	CHST13,CHST13	NM_152889,NM_152889	hyper.chimp
3	129116961	129117277	4	cg08488841,cg10961186,cg14701491,cg21716282	_,_	Island,Island,Island,Island	_,_	_,_	hyper.chimp
3	129756774	129757485	3	cg16818395,cg25581227,cg17367915	_,_	Island,Island,Island	_,_	_,_	hyper.chimp
3	130047670	130047780	2	cg18531004,cg19129842	_,_	Island,S_Shore	_,_	_,_	hyper.chimp
3	130205205	130205697	4	cg19380499,cg14091208,cg02484127,cg20255667	Body,Body,Body,Body	Island,Island,Island,Island	CCDC48,CCDC48,CCDC48,CCDC48	NM_024768,NM_024768,NM_024768,NM_024768	hyper.chimp
3	130385967	130386099	2	cg04793090,cg21100375	TSS1500;TSS1500;TSS1500;TSS1500;TSS1500;TSS1500,TSS1500;TSS1500;TSS1500;TSS1500;TSS1500;TSS1500	S_Shore,S_Shore	CNBP;CNBP;CNBP;CNBP;CNBP;CNBP,CNBP;CNBP;CNBP;CNBP;CNBP;CNBP	NM_001127195;NM_003418;NM_001127194;NM_001127196;NM_001127192;NM_001127193,NM_001127195;NM_003418;NM_001127194;NM_001127196;NM_001127192;NM_001127193	hyper.chimp
3	130806468	130806631	2	cg02544002,cg04506190	Body,Body	N_Shore,Island	PLXND1,PLXND1	NM_015103,NM_015103	hyper.chimp
3	131949561	131949758	2	cg01571722,cg12153222	TSS1500,TSS1500	S_Shore,S_Shore	PIK3R4,PIK3R4	NM_014602,NM_014602	hyper.chimp
3	132228132	132228529	10	cg21818333,cg04534198,cg17888249,cg17326690,cg25270252,cg16935709,cg13485052,cg22539279,cg18255614,cg08237663	TSS1500;1stExon;5UTR;TSS1500;TSS1500,TSS1500;1stExon;5UTR;TSS1500;TSS1500,TSS200;TSS200;1stExon;5UTR;TSS200,TSS200;TSS200;1stExon;5UTR;TSS200,TSS200;TSS200;1stExon;5UTR;TSS200,TSS200;TSS200;1stExon;5UTR;TSS200,TSS200;TSS200;TSS200;TSS200,TSS200;TSS200;TSS200;TSS200,TSS200;TSS200;TSS200;TSS200,1stExon;5UTR;1stExon;5UTR;1stExon;5UTR;TSS200	Island,Island,Island,Island,Island,Island,Island,Island,Island,Island	NEK11;ASTE1;ASTE1;NEK11;NEK11,NEK11;ASTE1;ASTE1;NEK11;NEK11,NEK11;NEK11;ASTE1;ASTE1;NEK11,NEK11;NEK11;ASTE1;ASTE1;NEK11,NEK11;NEK11;ASTE1;ASTE1;NEK11,NEK11;NEK11;ASTE1;ASTE1;NEK11,NEK11;NEK11;NEK11;ASTE1,NEK11;NEK11;NEK11;ASTE1,NEK11;NEK11;NEK11;ASTE1,NEK11;NEK11;NEK11;NEK11;NEK11;NEK11;ASTE1	NM_024800;NM_014065;NM_014065;NM_001146003;NM_145910,NM_024800;NM_014065;NM_014065;NM_001146003;NM_145910,NM_024800;NM_001146003;NM_014065;NM_014065;NM_145910,NM_024800;NM_001146003;NM_014065;NM_014065;NM_145910,NM_024800;NM_001146003;NM_014065;NM_014065;NM_145910,NM_024800;NM_001146003;NM_014065;NM_014065;NM_145910,NM_024800;NM_001146003;NM_145910;NM_014065,NM_024800;NM_001146003;NM_145910;NM_014065,NM_024800;NM_001146003;NM_145910;NM_014065,NM_145910;NM_024800;NM_001146003;NM_001146003;NM_024800;NM_145910;NM_014065
3	132728299	132728787	2	cg00703276,cg08151596	_,_	N_Shore,S_Shore	_,_	_,_
3	134239411	134239557	3	cg00871560,cg18538340,cg18542368	TSS1500;TSS1500,TSS1500;TSS1500,TSS1500;TSS1500	N_Shore,N_Shore,N_Shore	TMEM108;TMEM108,TMEM108;TMEM108,TMEM108;TMEM108	NM_023943;NM_001136469,NM_023943;NM_001136469,NM_023943;NM_001136469
3	134863898	134864107	2	cg24387198,cg08229532	TSS1500,TSS1500	S_Shore,S_Shore	TOPBP1,TOPBP1	NM_007027,NM_007027
3	135128755	135128785	2	cg00819338,cg07356486	_,_	N_Shore,Island	_,_	_,_
3	138019859	138020546	5	cg22156842,cg10727673,cg10258419,cg02672493,cg13383019	TSS1500;TSS1500;TSS1500,TSS1500;TSS1500;TSS1500,TSS1500;TSS1500;TSS1500,TSS200;TSS200;TSS200,TSS200;TSS200;TSS200	N_Shore,N_Shore,Island,Island,Island	TMEM22;TMEM22;TMEM22,TMEM22;TMEM22;TMEM22,TMEM22;TMEM22;TMEM22,TMEM22;TMEM22;TMEM22,TMEM22;TMEM22;TMEM22	NM_025246;NM_001097599;NM_001097600,NM_025246;NM_001097599;NM_001097600,NM_025246;NM_001097599;NM_001097600,NM_001097599;NM_001097600;NM_025246,NM_001097599;NM_001097600;NM_025246
3	138844216	138844222	2	cg03290530,cg24286765	_,_	_,_	_,_	_,_
3	138961061	138961354	2	cg15554219,cg00440531	_,_	N_Shore,N_Shore	_,_	_,_
3	139635527	139635968	5	cg09373148,cg11209249,cg21075829,cg14983698,cg16802792	TSS1500,TSS1500,TSS1500,TSS200,TSS200	N_Shore,N_Shore,N_Shore,Island,Island	ESYT3,ESYT3,ESYT3,ESYT3,ESYT3	NM_031913,NM_031913,NM_031913,NM_031913,NM_031913
3	147669727	147670396	4	cg24607783,cg24092307,cg04442406,cg02128651	5UTR,5UTR,5UTR,5UTR	N_Shore,Island,Island,Island	PLSCR2,PLSCR2,PLSCR2,PLSCR2	NM_020359,NM_020359,NM_020359,NM_020359
3	148581085	148581275	4	cg11209832,cg25425140,cg12836959,cg02630214	_,_	_,_	_,_	_,_
3	150286181	150286200	2	cg16444198,cg20038789	Body;Body,Body;Body	N_Shore,N_Shore	HLTF;HLTF,HLTF;HLTF	NM_139048;NM_003071,NM_139048;NM_003071
3	154036401	154036885	3	cg06903384,cg14921522,cg03293976	1stExon,1stExon,1stExon	Island,S_Shore,S_Shore	P2RY1,P2RY1,P2RY1	NM_002563,NM_002563,NM_002563
3	155525160	155525305	2	cg04813158,cg15277914	TSS200;TSS200,TSS1500;TSS1500	S_Shore,S_Shore	DHX36;DHX36,DHX36;DHX36	NM_001114397;NM_020865,NM_001114397;NM_020865
3	158743458	158743780	3	cg04682135,cg00301159,cg06827247	TSS1500;TSS1500;TSS1500;TSS1500,TSS1500;TSS1500;TSS1500;TSS1500,TSS200;TSS200;TSS200;TSS200	Island,Island,Island	C3orf55;C3orf55;C3orf55;C3orf55,C3orf55;C3orf55;C3orf55;C3orf55,C3orf55;C3orf55;C3orf55;C3orf55	NM_001130001;NM_001099777;NM_001130002;NR_024016,NM_001130001;NM_001099777;NM_001130002;NR_024016,NM_001099777;NM_001130001;NM_001130002;NR_024016
3	160001582	160001696	3	cg01971181,cg13419925,cg24324441	TSS1500;TSS1500,TSS1500;TSS1500,TSS1500;TSS1500	N_Shore,N_Shore,N_Shore	MFSD1;MFSD1,MFSD1;MFSD1,MFSD1;MFSD1	NM_022736;NM_001167903,NM_022736;NM_001167903,NM_022736;NM_001167903
3	161040246	161040491	3	cg25705519,cg00188627,cg15180789	Body,Body,Body	_,_	SCHIP1,SCHIP1,SCHIP1	NM_014575,NM_014575,NM_014575
3	171014425	171014558	2	cg03369965,cg10994914	TSS1500,_	S_Shore,S_Shore	LRRC34,_	NM_153353,_
3	173648211	173648578	3	cg18875012,cg03587978,cg10109500	1stExon;1stExon,1stExon;1stExon,1stExon;1stExon	Island,Island,Island	GHSR;GHSR,GHSR;GHSR,GHSR;GHSR	NM_198407;NM_004122,NM_198407;NM_004122,NM_198407;NM_004122
3	179736069	179736936	3	cg15736360,cg08812936,cg10634551	TSS1500,TSS200,5UTR;1stExon	_,_	KCNMB2,KCNMB2,KCNMB2;KCNMB2	NM_181361,NM_181361,NM_181361;NM_181361	hyper.chimp
3	135514353	135514638	3	cg01342115,cg25646708,cg12118013	_,_	Island,Island,Island	_,_	_,_	hypo.chimp
3	140143077	140144530	3	cg04687517,cg05131382,cg18005180	_,_	S_Shore,N_Shelf,N_Shore	_,_	_,_	hypo.chimp
3	140149409	140149575	3	cg18755942,cg25509697,cg10554436	TSS1500;Body,TSS1500;Body,TSS1500;Body	N_Shore,N_Shore,N_Shore	FOXL2;C3orf72,FOXL2;C3orf72,FOXL2;C3orf72	NM_023067;NM_001040061,NM_023067;NM_001040061,NM_023067;NM_001040061	hypo.chimp
3	141137973	141138941	2	cg16513416,cg04125341	Body,Body	S_Shore,S_Shore	CLSTN2,CLSTN2	NM_022131,NM_022131	hypo.chimp
3	142613879	142614836	2	cg03060555,cg09025210	5UTR,5UTR	_,_	ZBTB38,ZBTB38	NM_001080412,NM_001080412	hypo.chimp
3	150329440	150329871	2	cg10148280,cg23706994	TSS1500,TSS200	N_Shore,N_Shore	HPS3,HPS3	NM_032383,NM_032383	hypo.chimp
3	151012984	151013031	3	cg13512830,cg10802371,cg12461469	TSS200;TSS200,TSS200;TSS200,TSS200;TSS200	Island,Island,Island	RNF13;RNF13,RNF13;RNF13,RNF13;RNF13	NM_183381;NM_007282,NM_183381;NM_007282,NM_183381;NM_007282	hypo.chimp
3	152517164	152517359	2	cg19926250,cg09432154	5UTR;Body;1stExon,Body;TSS200	_,_	GPR87;MED12L;GPR87,MED12L;GPR87	NM_023915;NM_053002;NM_023915,NM_053002;NM_023915
3	155323069	155323408	2	cg12829666,cg02582963	Body,Body	Island,S_Shore	SGEF,SGEF	NM_015595,NM_015595
3	171166670	171166933	3	cg04561804,cg13888070,cg09436420	Body;TSS1500;Body,Body;TSS1500;Body,Body;TSS1500;Body	N_Shore,N_Shore,N_Shore	LOC100128164;SEC62;LOC100128164,LOC100128164;SEC62;LOC100128164,LOC100128164;SEC62;LOC100128164	NR_024409;NM_003262;NR_027622,NR_024409;NM_003262;NR_027622,NR_024409;NM_003262;NR_027622
3	171560239	171561163	2	cg25446191,cg15627834	5UTR;5UTR;5UTR;1stExon,Body;1stExon;Body	S_Shore,S_Shelf	SKIL;SKIL;SKIL;SKIL,SKIL;SKIL;SKIL	NM_001145097;NM_005414;NM_001145098;NM_001145097,NM_005414;NM_001145097;NM_001145098	hypo.chimp
3	171618894	171620899	4	cg13333304,cg20449692,cg00894757,cg20794824	TSS1500,1stExon,Body,Body	N_Shore,Island,Island,S_Shore	CLDN11,CLDN11,CLDN11,CLDN11	NM_005602,NM_005602,NM_005602,NM_005602	hypo.chimp
3	180461679	180461687	2	cg19436429,cg25262361	TSS1500;Body;TSS1500;Body,TSS1500;Body;TSS1500;Body	Island,Island	KCNMB3;KCNMB3;KCNMB3;KCNMB3,KCNMB3;KCNMB3;KCNMB3;KCNMB3	NM_171829;NM_001163677;NR_028135;NM_171828,NM_171829;NM_001163677;NR_028135;NM_171828	hyper.chimp
3	182895659	182897542	10	cg16246169,cg08196553,cg23978504,cg03880173,cg10263682,cg24267283,cg07304175,cg18562243,cg21453451,cg01530605	Body,Body,Body,Body,Body,Body,Body,Body,Body,Body	N_Shore,Island,Island,Island,Island,Island,S_Shore,S_Shore,S_Shore,S_Shore	SOX2OT,SOX2OT,SOX2OT,SOX2OT,SOX2OT,SOX2OT,SOX2OT,SOX2OT,SOX2OT,SOX2OT	NR_004053,NR_004053,NR_004053,NR_004053,NR_004053,NR_004053,NR_004053,NR_004053,NR_004053,NR_004053	hyper.chimp
3	182904121	182904911	6	cg20691722,cg02213103,cg16276063,cg20675389,cg08488945,cg23165310	Body,Body,Body,Body,Body,Body	_,_	SOX2OT,SOX2OT,SOX2OT,SOX2OT,SOX2OT,SOX2OT	NR_004053,NR_004053,NR_004053,NR_004053,NR_004053,NR_004053	hyper.chimp
3	182924039	182924672	8	cg25109019,cg22920300,cg17894318,cg02650401,cg13294849,cg25960893,cg11324832,cg27622679	Body,Body,Body,Body,Body,Body,Body,Body	N_Shelf,N_Shelf,N_Shelf,N_Shelf,N_Shelf,N_Shelf,N_Shelf,N_Shelf	SOX2OT,SOX2OT,SOX2OT,SOX2OT,SOX2OT,SOX2OT,SOX2OT,SOX2OT	NR_004053,NR_004053,NR_004053,NR_004053,NR_004053,NR_004053,NR_004053,NR_004053	hyper.chimp
3	184181609	184182283	2	cg20699141,cg06292482	TSS1500,TSS1500	S_Shore,S_Shore	DCUN1D1,DCUN1D1	NM_020640,NM_020640	hypo.chimp
3	184316673	184316911	2	cg18163973,cg16876162	_,_	_,_	_,_	_,_	hyper.chimp
3	185385823	185385996	2	cg05629195,cg13491563	TSS1500,TSS1500	N_Shore,N_Shore	ABCF3,ABCF3	NM_018358,NM_018358	hypo.chimp
3	185434899	185434906	2	cg25447717,cg00985388	Body,Body	S_Shelf,S_Shelf	VWA5B2,VWA5B2	NM_138345,NM_138345	hypo.chimp
3	185476405	185477210	8	cg01596834,cg05118764,cg02791331,cg19098796,cg16953297,cg19100138,cg08154107,cg01189038	TSS200;Body;TSS200;TSS200,TSS200;Body;TSS200;TSS200,TSS200;Body;TSS200;TSS200,TSS200;Body;TSS200;TSS200,1stExon;Body;5UTR;5UTR;5UTR;1stExon;1stExon,Body;Body;Body;Body,Body;Body;Body;Body,Body;Body;Body;Body	N_Shore,N_Shore,N_Shore,N_Shore,Island,Island,Island,S_Shore	ECE2;ECE2;ECE2;ECE2,ECE2;ECE2;ECE2;ECE2,ECE2;ECE2;ECE2;ECE2,ECE2;ECE2;ECE2;ECE2,ECE2;ECE2;ECE2;ECE2;ECE2;ECE2;ECE2,ECE2;ECE2;ECE2;ECE2,ECE2;ECE2;ECE2;ECE2,ECE2;ECE2;ECE2;ECE2	NM_001037324;NM_014693;NM_001100121;NM_001100120,NM_001037324;NM_014693;NM_001100121;NM_001100120,NM_001037324;NM_014693;NM_001100121;NM_001100120,NM_001037324;NM_014693;NM_001100121;NM_001100120,NM_001037324;NM_014693;NM_001100121;NM_001037324;NM_001100120;NM_001100121;NM_001100120,NM_001100120;NM_001037324;NM_014693;NM_001100121,NM_001100120;NM_001037324;NM_014693;NM_001100121,NM_001100120;NM_001037324;NM_014693;NM_001100121
3	185692689	185692888	3	cg27305835,cg03470180,cg23166252	_,_	S_Shore,S_Shore,S_Shore	_,_	_,_
3	186454839	186454847	2	cg11935638,cg08095700	TSS1500;TSS1500,TSS1500;TSS1500	S_Shore,S_Shore	EHHADH;EHHADH,EHHADH;EHHADH	NM_001166415;NM_001966,NM_001166415;NM_001966
3	188937133	188937171	2	cg06164260,cg23655939	5UTR;TSS200,5UTR;TSS200	N_Shore,N_Shore	BCL6;BCL6,BCL6;BCL6	NM_001706;NM_001130845,NM_001706;NM_001130845
3	195069958	195070474	3	cg22525069,cg02822788,cg13323489	_,_	N_Shore,Island,Island	_,_	_,_
3	196237638	196238388	2	cg19860353,cg11137156	_,_	_,_	_,_	_,_
3	196910018	196910213	2	cg06277638,cg06085042	TSS1500,TSS1500	_,_	MIR570,MIR570	NR_030296,NR_030296
3	197235143	197235199	2	cg24256810,cg04393693	_,_	_,_	_,_	_,_
3	197427841	197428110	2	cg04981056,cg05473677	1stExon;5UTR,Body	_,_	OSTalpha;OSTalpha,OSTalpha	NM_152672;NM_152672,NM_152672	hyper.chimp
3	185578199	185578670	2	cg11819637,cg09736922	5UTR,TSS200	N_Shelf,N_Shelf	THPO,THPO	NM_000460,NM_000460
3	188165328	188166123	2	cg12632309,cg15026574	5UTR;5UTR,5UTR;5UTR	_,_	ST6GAL1;ST6GAL1,ST6GAL1;ST6GAL1	NM_173216;NM_173217,NM_173216;NM_173217
3	188397996	188398014	2	cg05410198,cg08749917	1stExon;5UTR,1stExon	N_Shelf,N_Shelf	RTP1;RTP1,RTP1	NM_153708;NM_153708,NM_153708	hypo.chimp
3	195332012	195332677	2	cg06012804,cg00271177	_,_	N_Shelf,N_Shore	_,_	_,_	hypo.chimp
3	195470234	195471333	3	cg07065220,cg02523270,cg16932827	_,_	Island,Island,S_Shore	_,_	_,_	hypo.chimp
3	196356584	196357220	2	cg09709457,cg25586848	Body,Body	_,_	C3orf21,C3orf21	NM_152531,NM_152531	hypo.chimp
3	197413786	197413889	2	cg23052855,cg20278854	Body,Body	_,_	ZDHHC19,ZDHHC19	NM_001039617,NM_001039617	hypo.chimp
3	197422598	197423065	2	cg12702506,cg03362494	5UTR;1stExon,TSS1500	S_Shelf,_	ZDHHC19;ZDHHC19,ZDHHC19	NM_001039617;NM_001039617,NM_001039617
3	198731234	198732148	4	cg26396290,cg18163092,cg21853348,cg19798702	Body;Body;Body,Body;Body;Body,Body;Body;Body,Body;Body;Body	_,_	BDH1;BDH1;BDH1,BDH1;BDH1;BDH1,BDH1;BDH1;BDH1,BDH1;BDH1;BDH1	NM_203314;NM_203315;NM_004051,NM_203314;NM_203315;NM_004051,NM_203314;NM_203315;NM_004051,NM_203314;NM_203315;NM_004051
4	665827	665936	2	cg19427345,cg23143502	Body,Body	Island,Island	MFSD7,MFSD7	NM_032219,NM_032219
4	727453	728199	2	cg21445527,cg23486923	Body,Body	N_Shore,N_Shore	PCGF3,PCGF3	NM_006315,NM_006315
4	768336	768827	2	cg02941286,cg06672737	_,3UTR	N_Shore,Island	_,CPLX1	_,NM_006651	hypo.chimp
3	197740029	197740395	3	cg02728595,cg09279988,cg05542785	_,_	Island,Island,Island	_,_	_,_	hyper.chimp
3	197851015	197851391	4	cg24365518,cg00293409,cg23944925,cg26014952	TSS200,5UTR;1stExon,5UTR,5UTR	Island,Island,Island,S_Shore	LRRC33,LRRC33;LRRC33,LRRC33,LRRC33	NM_198565,NM_198565;NM_198565,NM_198565,NM_198565
3	198765865	198767524	7	cg03038685,cg03792768,cg24869195,cg02702614,cg09363194,cg00456086,cg00177496	5UTR;5UTR;5UTR,5UTR;5UTR;5UTR,5UTR;5UTR;5UTR,1stExon;5UTR;5UTR;1stExon;5UTR,TSS200;5UTR;TSS200,TSS1500;TSS1500;5UTR,TSS1500;TSS1500;5UTR	N_Shore,Island,Island,Island,Island,Island,Island	BDH1;BDH1;BDH1,BDH1;BDH1;BDH1,BDH1;BDH1;BDH1,BDH1;BDH1;BDH1;BDH1;BDH1,BDH1;BDH1;BDH1,BDH1;BDH1;BDH1,BDH1;BDH1;BDH1	NM_004051;NM_203314;NM_203315,NM_004051;NM_203314;NM_203315,NM_004051;NM_203314;NM_203315,NM_203314;NM_004051;NM_203314;NM_004051;NM_203315,NM_004051;NM_203315;NM_203314,NM_203314;NM_004051;NM_203315,NM_203314;NM_004051;NM_203315	hyper.chimp
3	199001919	199002381	2	cg03393017,cg12878710	TSS1500,TSS200	N_Shore,Island	LRCH3,LRCH3	NM_032773,NM_032773	hyper.chimp
4	664399	664590	2	cg08555912,cg00723338	Body,Body	N_Shore,N_Shore	MYL5,MYL5	NM_002477,NM_002477	hyper.chimp
4	672184	672834	2	cg13656831,cg24693053	Body,1stExon	N_Shore,Island	MFSD7,MFSD7	NM_032219,NM_032219	hyper.chimp
4	929027	929597	2	cg01437235,cg09216008	5UTR,5UTR	N_Shore,N_Shore	TMEM175,TMEM175	NM_032326,NM_032326	hypo.chimp
4	930614	930644	2	cg15105011,cg23939001	5UTR,5UTR	Island,Island	TMEM175,TMEM175	NM_032326,NM_032326	hypo.chimp
4	968723	969331	3	cg04969220,cg09153458,cg24226891	Body,Body;TSS1500,Body;TSS1500	N_Shore,N_Shore,N_Shore	SLC26A1,SLC26A1;IDUA,SLC26A1;IDUA	NM_134425,NM_134425;NM_000203,NM_134425;NM_000203	hypo.chimp
4	1031044	1031061	2	cg01321174,cg10825234	_,_	N_Shelf,N_Shelf	_,_	_,_	hypo.chimp
4	1097202	1097720	4	cg11118359,cg19563619,cg21397393,cg05924254	1stExon;1stExon,1stExon;5UTR;1stExon;5UTR,TSS200;TSS200,TSS200;TSS200	Island,Island,Island,Island	RNF212;RNF212,RNF212;RNF212;RNF212;RNF212,RNF212;RNF212,RNF212;RNF212	NM_001131034;NM_194439,NM_001131034;NM_001131034;NM_194439;NM_194439,NM_001131034;NM_194439,NM_001131034;NM_194439	hypo.chimp
4	1182458	1182501	2	cg05208416,cg14594485	Body;Body,Body;Body	S_Shelf,S_Shelf	LOC100130872;LOC100130872-SPON2,LOC100130872;LOC100130872-SPON2	NR_024569;NR_033182,NR_024569;NR_033182	hypo.chimp
4	1233849	1234086	4	cg20743744,cg16399632,cg08948841,cg15586393	TSS1500;TSS1500;TSS1500,TSS1500;TSS1500;TSS200,TSS1500;TSS1500;TSS200,TSS1500;TSS1500;TSS200	Island,Island,Island,Island	C4orf42;CTBP1;CTBP1,CTBP1;CTBP1;C4orf42,CTBP1;CTBP1;C4orf42,CTBP1;CTBP1;C4orf42	NM_052861;NM_001328;NM_001012614,NM_001328;NM_001012614;NM_052861,NM_001328;NM_001012614;NM_052861,NM_001328;NM_001012614;NM_052861	hypo.chimp
4	1390869	1392892	7	cg20332645,cg00711088,cg14959580,cg07150669,cg21230162,cg09883255,cg24789180	_,_	Island,Island,Island,Island,N_Shore,N_Shore,N_Shore	_,_	_,_	hypo.chimp
4	1397052	1397989	3	cg03303774,cg06275859,cg26860935	_,_	N_Shore,Island,Island	_,_	_,_	hyper.chimp
4	1491278	1491523	2	cg27311590,cg12456927	_,_	Island,Island	_,_	_,_	hypo.chimp
4	1528698	1528972	2	cg12030941,cg14746767	_,_	S_Shore,S_Shore	_,_	_,_	hyper.chimp
4	1539291	1539979	2	cg08655181,cg13260474	_,_	N_Shore,Island	_,_	_,_	hypo.chimp
4	1654537	1654589	2	cg08833010,cg00972950	5UTR,5UTR	N_Shore,N_Shore	FAM53A,FAM53A	NM_001013622,NM_001013622	hypo.chimp
4	2433812	2433848	2	cg20345948,cg21722242	_,_	Island,Island	_,_	_,_	hypo.chimp
4	3209103	3209121	2	cg23728864,cg11432275	Body,Body	_,_	HTT,HTT	NM_002111,NM_002111	hyper.chimp
4	3343203	3343353	2	cg05617980,cg05154546	Body;Body;Body,Body;Body;Body	N_Shore,N_Shore	RGS12;RGS12;RGS12,RGS12;RGS12;RGS12	NM_198229;NM_198227;NM_002926,NM_198229;NM_198227;NM_002926	hyper.chimp
4	3696053	3696634	3	cg06252028,cg21181942,cg23953110	_,_	_,_	_,_	_,_	hyper.chimp
4	3719211	3719413	3	cg13074295,cg06859969,cg05639690	_,_	S_Shore,S_Shore,S_Shore	_,_	_,_	hyper.chimp
4	4279066	4279551	4	cg12160317,cg14882700,cg05936219,cg11848060	Body,1stExon,TSS200,TSS200	Island,Island,Island,Island	OTOP1,OTOP1,OTOP1,OTOP1	NM_177998,NM_177998,NM_177998,NM_177998	hyper.chimp
4	4814160	4814273	3	cg23139982,cg25097610,cg15192103	_,_	_,_	_,_	_,_	hypo.chimp
4	4908342	4908407	2	cg03196097,cg24139732	_,_	N_Shore,N_Shore	_,_	_,_	hypo.chimp
4	4910861	4912305	3	cg19846622,cg21689228,cg05790982	TSS1500,TSS1500,5UTR;1stExon	Island,N_Shore,Island	MSX1,MSX1,MSX1;MSX1	NM_002448,NM_002448,NM_002448;NM_002448
4	6157922	6158692	7	cg18994250,cg23166781,cg06231140,cg22098660,cg21003654,cg01929855,cg22667835	Body;Body,Body;Body,Body;Body,Body;Body,Body;Body,Body;Body,Body;Body	N_Shore,Island,Island,Island,Island,Island,S_Shore	JAKMIP1;JAKMIP1,JAKMIP1;JAKMIP1,JAKMIP1;JAKMIP1,JAKMIP1;JAKMIP1,JAKMIP1;JAKMIP1,JAKMIP1;JAKMIP1,JAKMIP1;JAKMIP1	NM_144720;NM_001099433,NM_144720;NM_001099433,NM_144720;NM_001099433,NM_144720;NM_001099433,NM_144720;NM_001099433,NM_144720;NM_001099433,NM_144720;NM_001099433
4	7825627	7825668	2	cg07109358,cg06934132	Body;Body;Body,Body;Body;Body	Island,Island	AFAP1;AFAP1;LOC84740,AFAP1;AFAP1;LOC84740	NM_198595;NM_001134647;NR_026892,NM_198595;NM_001134647;NR_026892
4	15080312	15080797	3	cg21329975,cg18470593,cg24225360	TSS1500;TSS1500;TSS1500,TSS200;TSS200;TSS200,5UTR;5UTR;5UTR	_,_	CC2D2A;CC2D2A;CC2D2A,CC2D2A;CC2D2A;CC2D2A,CC2D2A;CC2D2A;CC2D2A	NM_001080522;NM_001164720;NM_020785,NM_001164720;NM_001080522;NM_020785,NM_001164720;NM_020785;NM_001080522	hypo.chimp
4	6298116	6298731	5	cg11115235,cg23893898,cg03925294,cg06424065,cg03877332	_,_	Island,Island,Island,Island,Island	_,_	_,_	hyper.chimp
4	6761562	6762884	8	cg02311456,cg25285658,cg09477006,cg14489884,cg10203523,cg04884618,cg24911064,cg07780086	3UTR,3UTR,1stExon,1stExon;5UTR,TSS200,TSS200,TSS1500,TSS1500	N_Shore,N_Shore,Island,Island,Island,Island,S_Shore,S_Shore	MRFAP1L1,MRFAP1L1,MRFAP1L1,MRFAP1L1;MRFAP1L1,MRFAP1L1,MRFAP1L1,MRFAP1L1,MRFAP1L1	NM_203462,NM_203462,NM_203462,NM_203462;NM_203462,NM_203462,NM_203462,NM_203462,NM_203462
4	7991028	7991326	3	cg25003275,cg14692106,cg20708173	5UTR;5UTR,5UTR;5UTR,5UTR;5UTR	N_Shore,N_Shore,N_Shore	AFAP1;AFAP1,AFAP1;AFAP1,AFAP1;AFAP1	NM_198595;NM_001134647,NM_198595;NM_001134647,NM_198595;NM_001134647
4	8410358	8410399	2	cg12444166,cg09979924	_,_	_,_	_,_	_,_
4	8449637	8449780	2	cg06656551,cg04334422	Body;Body,Body;Body	_,_	ACOX3;ACOX3,ACOX3;ACOX3	NM_001101667;NM_003501,NM_001101667;NM_003501
4	8463269	8463695	4	cg25963412,cg08722675,cg17055207,cg00251622	Body;Body,Body;Body,Body;Body,Body;Body	_,_	ACOX3;ACOX3,ACOX3;ACOX3,ACOX3;ACOX3,ACOX3;ACOX3	NM_001101667;NM_003501,NM_001101667;NM_003501,NM_001101667;NM_003501,NM_001101667;NM_003501
4	9054256	9055182	2	cg02745398,cg26389500	TSS1500,TSS200	_,_	DEFB131,DEFB131	NM_001040448,NM_001040448
4	10069027	10069107	2	cg20332195,cg08745665	TSS1500,TSS1500	S_Shore,S_Shore	ZNF518B,ZNF518B	NM_053042,NM_053042
4	13134703	13135695	2	cg09986292,cg14832317	_,_	Island,Island	_,_	_,_
4	13136808	13136973	2	cg00790371,cg06369785	_,_	N_Shore,N_Shore	_,_	_,_
4	13264997	13265115	4	cg03032456,cg06907870,cg25984034,cg07661848	_,_	_,_	_,_	_,_
4	15549131	15549156	2	cg13726191,cg00800679	TSS200,TSS200	_,_	FGFBP1,FGFBP1	NM_005130,NM_005130
4	17225289	17225330	2	cg02297831,cg14227996	TSS200,TSS200	Island,Island	MED28,MED28	NM_025205,NM_025205
4	25265928	25266726	2	cg09157302,cg21200703	TSS1500,5UTR	N_Shore,S_Shore	SLC34A2,SLC34A2	NM_006424,NM_006424	hyper.chimp
4	15312704	15313697	2	cg06000781,cg18645906	TSS1500,1stExon;5UTR	N_Shore,N_Shore	BST1,BST1;BST1	NM_004334,NM_004334;NM_004334
4	15573841	15574200	4	cg08132711,cg18101225,cg14537800,cg12723011	1stExon,TSS200,TSS200,TSS1500	_,_	FGFBP2,FGFBP2,FGFBP2,FGFBP2	NM_031950,NM_031950,NM_031950,NM_031950
4	17320009	17320120	2	cg03267220,cg17997207	Body,Body	Island,Island	FAM184B,FAM184B	NM_015688,NM_015688
4	23499757	23500694	3	cg02896941,cg09082664,cg20723350	Body,Body,1stExon;5UTR	_,_	PPARGC1A,PPARGC1A,PPARGC1A;PPARGC1A	NM_013261,NM_013261,NM_013261;NM_013261	hypo.chimp
4	26194316	26194489	3	cg15491432,cg19481816,cg15645986	TSS1500,TSS200,TSS200	N_Shore,N_Shore,N_Shore	TBC1D19,TBC1D19,TBC1D19	NM_018317,NM_018317,NM_018317	hyper.chimp
4	35244373	35244441	2	cg11236841,cg19375140	_,_	_,_	_,_	_,_	hyper.chimp
4	39874524	39874876	3	cg20171453,cg05658107,cg26296101	TSS1500,TSS200,TSS200	_,_	RHOH,RHOH,RHOH	NM_004310,NM_004310,NM_004310	hypo.chimp
4	40283310	40283865	2	cg00802478,cg20789700	5UTR,5UTR	_,_	RBM47,RBM47	NM_001098634,NM_001098634	hypo.chimp
4	41056380	41056676	3	cg25740652,cg23653457,cg09018824	TSS1500;TSS1500;TSS1500,TSS1500;TSS1500;TSS1500,TSS1500;TSS1500;TSS1500	N_Shore,N_Shore,N_Shore	LIMCH1;LIMCH1;LIMCH1,LIMCH1;LIMCH1;LIMCH1,LIMCH1;LIMCH1;LIMCH1	NM_001112718;NM_001112717;NM_014988,NM_001112718;NM_001112717;NM_014988,NM_001112718;NM_001112717;NM_014988	hyper.chimp
4	41572876	41574408	4	cg18779296,cg23233843,cg09468051,cg03986858	_,_	N_Shelf,N_Shore,N_Shore,N_Shore	_,_	_,_	hyper.chimp
4	41816863	41816918	2	cg27661315,cg22745397	Body;Body,Body;Body	_,_	BEND4;BEND4,BEND4;BEND4	NM_207406;NM_001159547,NM_207406;NM_001159547	hypo.chimp
4	41850017	41850065	2	cg09098195,cg08702941	TSS1500;TSS1500,TSS1500;TSS1500	S_Shore,S_Shore	BEND4;BEND4,BEND4;BEND4	NM_207406;NM_001159547,NM_207406;NM_001159547	hyper.chimp
4	48603226	48603659	5	cg04961553,cg24308654,cg00332212,cg23545105,cg08942875	5UTR;5UTR,5UTR;5UTR,1stExon;1stExon;5UTR;5UTR,TSS200;TSS200,TSS200;TSS200	Island,Island,Island,Island,S_Shore	OCIAD2;OCIAD2,OCIAD2;OCIAD2,OCIAD2;OCIAD2;OCIAD2;OCIAD2,OCIAD2;OCIAD2,OCIAD2;OCIAD2	NM_152398;NM_001014446,NM_152398;NM_001014446,NM_152398;NM_001014446;NM_152398;NM_001014446,NM_152398;NM_001014446,NM_152398;NM_001014446	hyper.chimp
4	53218239	53218504	2	cg10098221,cg06383135	TSS1500;Body,TSS1500;Body	N_Shore,N_Shore	USP46;USP46,USP46;USP46	NM_001134223;NM_022832,NM_001134223;NM_022832	hyper.chimp
4	53283117	53283607	6	cg19520201,cg22093805,cg15038123,cg02929209,cg20743065,cg14177328	_,_	Island,Island,Island,Island,Island,S_Shore	_,_	_,_	hyper.chimp
4	54794989	54795675	2	cg02645970,cg20831777	5UTR,5UTR	Island,S_Shore	PDGFRA,PDGFRA	NM_006206,NM_006206	hyper.chimp
4	57105831	57105976	2	cg16579049,cg23861655	_,_	Island,Island	_,_	_,_	hyper.chimp
4	57755366	57755530	2	cg26986681,cg17932096	_,_	N_Shore,N_Shore	_,_	_,_	hypo.chimp
4	62065623	62065835	3	cg16225703,cg20299458,cg21814870	Body,Body,Body	Island,Island,Island	LPHN3,LPHN3,LPHN3	NM_015236,NM_015236,NM_015236	hyper.chimp
4	74937842	74938153	3	cg26125600,cg20615832,cg06464962	TSS200,1stExon,Body	N_Shore,Island,Island	PF4V1,PF4V1,PF4V1	NM_002620,NM_002620,NM_002620	hypo.chimp
4	75060773	75060805	2	ch.4.75060773F,ch.4.75060805F	_,_	_,_	_,_	_,_	hypo.chimp
4	75065964	75067256	7	cg01447579,cg15158783,cg21043213,cg06834998,cg05509609,cg13126871,cg14882398	Body,1stExon,1stExon;5UTR,TSS200,TSS200,TSS1500,TSS1500	N_Shore,Island,Island,Island,Island,S_Shore,S_Shore	PF4,PF4,PF4;PF4,PF4,PF4,PF4,PF4	NM_002619,NM_002619,NM_002619;NM_002619,NM_002619,NM_002619,NM_002619,NM_002619
4	77560865	77561812	5	cg03405128,cg02093808,cg20432211,cg04474085,cg02500042	_,_	N_Shore,Island,Island,Island,S_Shore	_,_	_,_
4	79557861	79558120	2	cg02102872,cg14905320	Body;Body,Body;Body	_,_	FRAS1;FRAS1,FRAS1;FRAS1	NM_025074;NM_001166133,NM_025074;NM_001166133
4	81322992	81323719	2	cg05007549,cg15656813	_,_	N_Shore,N_Shore	_,_	_,_
4	83939650	83939653	2	cg27147000,cg20740157	TSS1500;TSS1500,TSS1500;TSS1500	S_Shore,S_Shore	SCD5;SCD5,SCD5;SCD5	NM_024906;NM_001037582,NM_024906;NM_001037582
4	100069687	100070179	8	cg23048334,cg19168309,cg00876501,cg14972143,cg11037477,cg21554861,cg18160135,cg12527684	5UTR;1stExon;5UTR;TSS1500;1stExon,5UTR;1stExon;5UTR;TSS1500;1stExon,5UTR;1stExon;5UTR;TSS1500;1stExon,5UTR;1stExon;5UTR;TSS1500;1stExon,5UTR;1stExon;5UTR;TSS1500;1stExon,5UTR;1stExon;5UTR;TSS1500;1stExon,5UTR;1stExon;5UTR;TSS1500;1stExon,5UTR;1stExon;5UTR;TSS1500;1stExon	S_Shore,S_Shore,S_Shore,S_Shore,S_Shore,S_Shore,S_Shore,S_Shore	EIF4E;EIF4E;EIF4E;EIF4E;EIF4E,EIF4E;EIF4E;EIF4E;EIF4E;EIF4E,EIF4E;EIF4E;EIF4E;EIF4E;EIF4E,EIF4E;EIF4E;EIF4E;EIF4E;EIF4E,EIF4E;EIF4E;EIF4E;EIF4E;EIF4E,EIF4E;EIF4E;EIF4E;EIF4E;EIF4E,EIF4E;EIF4E;EIF4E;EIF4E;EIF4E,EIF4E;EIF4E;EIF4E;EIF4E;EIF4E	NM_001130679;NM_001968;NM_001968;NM_001130678;NM_001130679,NM_001130679;NM_001968;NM_001968;NM_001130678;NM_001130679,NM_001130679;NM_001968;NM_001968;NM_001130678;NM_001130679,NM_001130679;NM_001968;NM_001968;NM_001130678;NM_001130679,NM_001130679;NM_001968;NM_001968;NM_001130678;NM_001130679,NM_001130679;NM_001968;NM_001968;NM_001130678;NM_001130679,NM_001130679;NM_001968;NM_001968;NM_001130678;NM_001130679,NM_001130679;NM_001968;NM_001968;NM_001130678;NM_001130679
4	102559714	102559846	2	cg26639552,cg03582157	_,_	_,_	_,_	_,_
4	104217738	104217946	5	cg01422467,cg09141303,cg18626035,cg04802386,cg14459011	TSS200,TSS200,TSS200,TSS200,TSS1500	S_Shore,S_Shore,S_Shore,S_Shore,S_Shore	NHEDC2,NHEDC2,NHEDC2,NHEDC2,NHEDC2	NM_178833,NM_178833,NM_178833,NM_178833,NM_178833
4	114190066	114190188	2	cg11521427,cg02060584	TSS200;Body;TSS200,TSS200;Body;TSS200	_,_	ANK2;ANK2;ANK2,ANK2;ANK2;ANK2	NM_020977;NM_001127493;NM_001148,NM_020977;NM_001127493;NM_001148
4	114433023	114433898	4	cg02296478,cg08448479,cg21287322,cg23371754	Body;Body;Body,Body;Body;Body,Body;Body;Body,Body;Body;Body	_,_	ANK2;ANK2;ANK2,ANK2;ANK2;ANK2,ANK2;ANK2;ANK2,ANK2;ANK2;ANK2	NM_001148;NM_001127493;NM_020977,NM_001148;NM_001127493;NM_020977,NM_001148;NM_001127493;NM_020977,NM_001148;NM_001127493;NM_020977
4	122904595	122905125	5	cg14654731,cg03077077,cg19737970,cg13640145,cg16790291	5UTR;TSS1500,5UTR;TSS1500,5UTR;TSS1500,TSS200;5UTR,TSS200;5UTR	N_Shore,N_Shore,N_Shore,N_Shore,N_Shore	TMEM155;LOC100192379,TMEM155;LOC100192379,TMEM155;LOC100192379,LOC100192379;TMEM155,LOC100192379;TMEM155	NM_152399;NR_024365,NM_152399;NR_024365,NM_152399;NR_024365,NR_024365;NM_152399,NR_024365;NM_152399	hypo.chimp
4	75183124	75183932	2	cg18356190,cg09745243	Body,TSS200	N_Shore,Island	CXCL2,CXCL2	NM_002089,NM_002089	hyper.chimp
4	79691629	79691667	2	cg19069553,cg06964816	TSS200,TSS200	N_Shore,N_Shore	ANXA3,ANXA3	NM_005139,NM_005139	hyper.chimp
4	84425193	84425223	2	cg19050973,cg26853401	TSS200,TSS200	S_Shore,S_Shore	COQ2,COQ2	NM_015697,NM_015697	hyper.chimp
4	85620782	85621167	2	cg23793104,cg03475509	_,_	N_Shore,N_Shore	_,_	_,_	hyper.chimp
4	85622433	85623123	4	cg10785622,cg25174438,cg24813038,cg13582816	_,_	N_Shore,Island,Island,Island	_,_	_,_	hyper.chimp
4	85624156	85624642	3	cg03554749,cg12351587,cg03988540	_,_	Island,Island,S_Shore	_,_	_,_	hyper.chimp
4	90976401	90976556	3	cg06632027,cg14346243,cg26578617	5UTR;5UTR;5UTR;5UTR,5UTR;5UTR;5UTR;5UTR,5UTR;5UTR;5UTR;5UTR	N_Shore,N_Shore,N_Shore	SNCA;SNCA;SNCA;SNCA,SNCA;SNCA;SNCA;SNCA,SNCA;SNCA;SNCA;SNCA	NM_001146055;NM_000345;NM_001146054;NM_007308,NM_001146055;NM_000345;NM_001146054;NM_007308,NM_001146055;NM_000345;NM_001146054;NM_007308	hyper.chimp
4	100461885	100461980	2	cg15395354,cg05641529	TSS1500,TSS1500	_,_	ADH1B,ADH1B	NM_000668,NM_000668	hyper.chimp
4	102930770	102931420	5	cg20762861,cg25023994,cg00332153,cg27140058,cg14855874	TSS200;TSS200,5UTR;1stExon;1stExon;5UTR,5UTR;1stExon;1stExon;5UTR,Body;Body,Body;Body	N_Shore,N_Shore,Island,S_Shore,S_Shore	BANK1;BANK1,BANK1;BANK1;BANK1;BANK1,BANK1;BANK1;BANK1;BANK1,BANK1;BANK1,BANK1;BANK1	NM_017935;NM_001127507,NM_001127507;NM_017935;NM_001127507;NM_017935,NM_001127507;NM_017935;NM_001127507;NM_017935,NM_001127507;NM_017935,NM_001127507;NM_017935	hyper.chimp
4	110871120	110871271	3	cg12835256,cg18274325,cg16243646	TSS1500,TSS1500,TSS1500	S_Shore,S_Shore,S_Shore	PLA2G12A,PLA2G12A,PLA2G12A	NM_030821,NM_030821,NM_030821	hyper.chimp
4	111751375	111752996	7	cg06374962,cg11416290,cg07349208,cg10699857,cg23404248,cg12652641,cg05103917	_,_	N_Shore,N_Shore,Island,Island,Island,Island,S_Shore	_,_	_,_	hyper.chimp
4	113285740	113285747	2	cg14091589,cg16092834	TSS1500,TSS1500	N_Shore,N_Shore	C4orf32,C4orf32	NM_152400,NM_152400	hyper.chimp
4	113552418	113552718	6	cg08331733,cg04085768,cg11376227,cg21137236,cg27183456,cg02090418	Body;Body,Body;Body,Body;Body,Body;Body,Body;Body,Body;Body	Island,Island,Island,Island,Island,Island	ALPK1;ALPK1,ALPK1;ALPK1,ALPK1;ALPK1,ALPK1;ALPK1,ALPK1;ALPK1,ALPK1;ALPK1	NM_025144;NM_001102406,NM_025144;NM_001102406,NM_025144;NM_001102406,NM_025144;NM_001102406,NM_025144;NM_001102406,NM_025144;NM_001102406	hyper.chimp
4	129200702	129200936	2	cg00574819,cg04760493	TSS1500;TSS1500;TSS1500,TSS1500;TSS1500;TSS1500	N_Shore,N_Shore	LARP1B;LARP1B;LARP1B,LARP1B;LARP1B;LARP1B	NM_178043;NM_032239;NM_018078,NM_178043;NM_032239;NM_018078	hypo.chimp
4	135341860	135342557	4	cg18236571,cg10850791,cg18270926,cg15765486	5UTR,5UTR,TSS1500,TSS1500	_,_	PABPC4L,PABPC4L,PABPC4L,PABPC4L	NM_001114734,NM_001114734,NM_001114734,NM_001114734	hyper.chimp
4	140382569	140382626	2	cg03804609,cg14772087	_,_	_,_	_,_	_,_	hypo.chimp
4	141513435	141513459	2	cg02182440,cg05576648	TSS1500;Body;Body;TSS1500;TSS1500;Body;Body;Body,TSS1500;Body;Body;TSS1500;TSS1500;Body;Body;Body	N_Shore,N_Shore	SCOC;SCOC;SCOC;SCOC;SCOC;SCOC;SCOC;SCOC,SCOC;SCOC;SCOC;SCOC;SCOC;SCOC;SCOC;SCOC	NM_001153552;NM_001153585;NM_032547;NM_001153663;NM_001153484;NM_001153690;NM_001153446;NM_001153635,NM_001153552;NM_001153585;NM_032547;NM_001153663;NM_001153484;NM_001153690;NM_001153446;NM_001153635	hyper.chimp
4	154078893	154079010	2	cg10573530,cg25573635	_,_	S_Shore,S_Shore	_,_	_,_	hypo.chimp
4	154932030	154933519	9	cg25185173,cg06610376,cg00517787,cg14028622,cg06202276,cg17898329,cg18674643,cg22366088,cg15493618	_,_	Island,N_Shore,N_Shore,N_Shore,N_Shore,N_Shore,Island,Island,Island	_,_	_,_	hyper.chimp
4	155881141	155881208	2	cg08271909,cg03065175	_,_	Island,Island	_,_	_,_	hypo.chimp
4	155921859	155921861	2	cg22103164,cg08282428	TSS200,TSS200	Island,Island	RBM46,RBM46	NM_144979,NM_144979	hyper.chimp
4	158345324	158345423	2	cg12726190,cg12560907	_,_	_,_	_,_	_,_	hyper.chimp
4	166118116	166118846	8	cg16691177,cg25147158,cg05767411,cg13023646,cg14038058,cg11512289,cg11955878,cg20233582	5UTR,1stExon;5UTR,TSS200,TSS200,TSS200,TSS200,TSS200,TSS1500	_,_	TRIM61,TRIM61;TRIM61,TRIM61,TRIM61,TRIM61,TRIM61,TRIM61,TRIM61	NM_001012414,NM_001012414;NM_001012414,NM_001012414,NM_001012414,NM_001012414,NM_001012414,NM_001012414,NM_001012414	hyper.chimp
4	174657952	174659483	6	cg08814800,cg17139666,cg02307239,cg06132727,cg04840702,cg08125755	_,_	Island,Island,Island,Island,S_Shore,S_Shore	_,_	_,_	hyper.chimp
4	174668305	174668435	2	cg09867290,cg08733172	_,_	S_Shore,S_Shore	_,_	_,_	hypo.chimp
4	174676678	174677256	2	cg19777067,cg23291886	_,_	Island,S_Shore	_,_	_,_	hyper.chimp
4	175680695	175681057	4	cg13181537,cg05527430,cg04555941,cg01084566	TSS200;TSS1500;TSS1500,TSS200;TSS1500;TSS1500,TSS1500;TSS1500;TSS1500,TSS1500;TSS1500;TSS1500	S_Shore,S_Shore,S_Shore,S_Shore	HPGD;HPGD;HPGD,HPGD;HPGD;HPGD,HPGD;HPGD;HPGD,HPGD;HPGD;HPGD	NR_027332;NM_000860;NM_001145816,NR_027332;NM_000860;NM_001145816,NR_027332;NM_000860;NM_001145816,NR_027332;NM_000860;NM_001145816	hyper.chimp
4	183298824	183300188	7	cg07493858,cg11393122,cg02353258,cg23370946,cg18304448,cg08985979,cg05812452	Body,Body,Body,Body,Body,Body,Body	N_Shore,N_Shore,N_Shore,N_Shore,N_Shore,N_Shore,N_Shore	MGC45800,MGC45800,MGC45800,MGC45800,MGC45800,MGC45800,MGC45800	NR_027107,NR_027107,NR_027107,NR_027107,NR_027107,NR_027107,NR_027107	hypo.chimp
4	184879619	184879911	3	cg26678138,cg22078781,cg08721802	_,_	N_Shore,N_Shore,N_Shore	_,_	_,_	hypo.chimp
4	185145248	185146012	7	cg23573638,cg03189821,cg15859390,cg02968918,cg05986067,cg13966557,cg00058887	Body,Body,Body,Body,Body,Body,Body	_,_	STOX2,STOX2,STOX2,STOX2,STOX2,STOX2,STOX2	NM_020225,NM_020225,NM_020225,NM_020225,NM_020225,NM_020225,NM_020225	hypo.chimp
4	185326913	185327037	2	cg04993089,cg11106865	Body,Body	Island,S_Shore	ENPP6,ENPP6	NM_153343,NM_153343	hypo.chimp
4	185506120	185506293	2	cg16855355,cg06612130	_,_	_,_	_,_	_,_	hyper.chimp
4	185696310	185696389	2	cg14879153,cg11308338	_,_	_,_	_,_	_,_	hyper.chimp
4	186171791	186173472	4	cg00092309,cg12494515,cg23761017,cg22472945	_,_	N_Shelf,N_Shore,N_Shore,N_Shore	_,_	_,_	hyper.chimp
4	186361753	186362498	4	cg01881046,cg22096870,cg04889050,cg03670132	5UTR,TSS1500,TSS1500,TSS1500	Island,Island,Island,S_Shore	KIAA1430,KIAA1430,KIAA1430,KIAA1430	NM_020827,NM_020827,NM_020827,NM_020827
4	187114491	187114544	2	cg20544605,cg19216056	5UTR;1stExon,5UTR;1stExon	_,_	SORBS2;SORBS2,SORBS2;SORBS2	NM_021069;NM_021069,NM_021069;NM_021069
4	187712663	187712885	2	cg02303933,cg22261866	Body,Body	N_Shore,N_Shore	MTNR1A,MTNR1A	NM_005958,NM_005958
4	187827530	187827573	2	cg08288016,cg01880399	Body,Body	_,_	FAT1,FAT1	NM_005245,NM_005245
4	189153490	189155925	11	cg24519147,cg17214381,cg00663077,cg14817655,cg24896649,cg14189571,cg11638298,cg27634344,cg09357276,cg26398286,cg12704432	TSS1500,TSS1500,TSS1500,TSS200,TSS200,1stExon;5UTR,5UTR,5UTR,5UTR,5UTR,5UTR	N_Shore,Island,Island,Island,Island,S_Shore,S_Shore,S_Shore,S_Shore,S_Shore,S_Shelf	ZFP42,ZFP42,ZFP42,ZFP42,ZFP42,ZFP42;ZFP42,ZFP42,ZFP42,ZFP42,ZFP42,ZFP42	NM_174900,NM_174900,NM_174900,NM_174900,NM_174900,NM_174900;NM_174900,NM_174900,NM_174900,NM_174900,NM_174900,NM_174900
4	189190900	189190963	2	cg02571636,cg15474402	_,_	_,_	_,_	_,_
4	189440756	189441290	2	cg16206659,cg24200107	_,_	Island,Island	_,_	_,_
4	190834403	190834736	2	cg21848981,cg07467958	_,_	_,_	_,_	_,_
5	396927	397057	2	cg14714797,cg09338136	Body,Body	Island,Island	AHRR,AHRR	NM_020731,NM_020731
5	558985	559343	2	cg04764584,cg24632646	Body,Body	N_Shore,Island	SLC9A3,SLC9A3	NM_004174,NM_004174
5	747376	747438	2	cg27338935,cg08724510	TSS1500,TSS1500	Island,S_Shore	TPPP,TPPP	NM_007030,NM_007030
5	945724	945775	3	cg26504197,cg02364331,cg21160852	TSS1500;Body;TSS1500;TSS200;1stExon,TSS1500;Body;TSS1500;TSS200;1stExon,TSS200;TSS200;Body;5UTR;TSS200;1stExon	Island,Island,Island	TRIP13;BRD9;TRIP13;BRD9;BRD9,TRIP13;BRD9;TRIP13;BRD9;BRD9,TRIP13;TRIP13;BRD9;BRD9;BRD9;BRD9	NM_004237;NR_027633;NM_001166260;NM_001009877;NM_023924,NM_004237;NR_027633;NM_001166260;NM_001009877;NM_023924,NM_001166260;NM_004237;NR_027633;NM_023924;NM_001009877;NM_023924	hyper.chimp
4	187456424	187456972	3	cg14349977,cg18753646,cg25503913	_,_	Island,Island,S_Shore	_,_	_,_	hypo.chimp
4	187866514	187867015	2	cg10010780,cg05333968	Body,Body	_,_	FAT1,FAT1	NM_005245,NM_005245	hypo.chimp
4	191098923	191099533	4	cg22652960,cg14036097,cg01737532,cg01543582	TSS200,1stExon;5UTR,1stExon,Body	Island,Island,Island,S_Shore	FRG1,FRG1;FRG1,FRG1,FRG1	NM_004477,NM_004477;NM_004477,NM_004477,NM_004477
5	244242	245103	11	cg01239922,cg03553576,cg15351009,cg24696500,cg00607051,cg26866348,cg12711961,cg15730313,cg13787932,cg19858576,cg18443893	TSS1500,TSS1500,TSS200,TSS200,TSS200,TSS200,TSS200,1stExon;5UTR,1stExon,1stExon,1stExon	N_Shore,N_Shore,N_Shore,N_Shore,N_Shore,N_Shore,N_Shore,N_Shore,Island,Island,Island	LRRC14B,LRRC14B,LRRC14B,LRRC14B,LRRC14B,LRRC14B,LRRC14B,LRRC14B;LRRC14B,LRRC14B,LRRC14B,LRRC14B	NM_001080478,NM_001080478,NM_001080478,NM_001080478,NM_001080478,NM_001080478,NM_001080478,NM_001080478;NM_001080478,NM_001080478,NM_001080478,NM_001080478	hypo.chimp
5	272334	272908	2	cg08677715,cg01808736	Body;TSS1500,Body	S_Shore,S_Shore	SDHA;CCDC127,SDHA	NM_004168;NM_145265,NM_004168	hypo.chimp
5	495385	495821	2	cg01890435,cg23239828	TSS1500;3UTR;1stExon,TSS1500;1stExon	N_Shore,Island	EXOC3;C5orf55;C5orf55,EXOC3;C5orf55	NM_007277;NM_138464;NM_138464,NM_007277;NM_138464
5	515141	515447	4	cg11690789,cg25536510,cg08236499,cg16584290	Body,Body,Body,Body	N_Shelf,N_Shelf,N_Shelf,N_Shelf	EXOC3,EXOC3,EXOC3,EXOC3	NM_007277,NM_007277,NM_007277,NM_007277
5	1919120	1919329	2	cg15414975,cg11795015	_,_	_,_	_,_	_,_
5	5548215	5548359	3	cg16698038,cg17921412,cg20772375	_,_	Island,Island,Island	_,_	_,_
5	20024423	20024605	4	cg17523769,cg00566208,cg05676441,cg27122431	TSS1500;TSS1500,TSS1500;TSS1500,TSS1500;TSS1500,TSS1500;TSS1500	_,_	CDH18;CDH18,CDH18;CDH18,CDH18;CDH18,CDH18;CDH18	NM_004934;NM_001167667,NM_004934;NM_001167667,NM_004934;NM_001167667,NM_004934;NM_001167667
5	35266306	35266692	3	cg05877402,cg04977602,cg00220677	1stExon;5UTR,1stExon;5UTR,TSS200	_,_	PRLR;PRLR,PRLR;PRLR,PRLR	NM_000949;NM_000949,NM_000949;NM_000949,NM_000949
5	40792197	40792219	2	cg11301254,cg02588309	TSS1500,TSS1500	S_Shore,S_Shore	TTC33,TTC33	NM_012382,NM_012382
5	41906613	41906815	2	cg21515384,cg02441090	TSS200,TSS1500	Island,S_Shore	OXCT1,OXCT1	NM_000436,NM_000436
5	41961472	41961529	2	cg19374885,cg22359217	Body;Body,Body;Body	Island,S_Shore	FBXO4;FBXO4,FBXO4;FBXO4	NM_012176;NM_033484,NM_012176;NM_033484
5	42979614	42980214	3	cg03124514,cg27649348,cg01025774	_,_	N_Shore,N_Shore,Island	_,_	_,_
5	42985299	42988126	13	cg06843889,cg18244817,cg04159903,cg13930261,cg19814934,cg02413594,cg18787478,cg18260625,cg03780132,cg27605748,cg13864319,cg17757602,cg15936446	_,_	N_Shore,N_Shore,N_Shore,N_Shore,N_Shore,N_Shore,N_Shore,Island,Island,Island,Island,Island,Island	_,_	_,_
5	42989300	42989347	2	cg02282631,cg21587238	_,_	S_Shore,S_Shore	_,_	_,_
5	54215927	54216011	2	cg22277296,cg15722526	_,_	Island,S_Shore	_,_	_,_
5	74382016	74383295	3	cg11926485,cg23175023,cg05483076	_,_	N_Shore,N_Shore,N_Shore	_,_	_,_
5	75939153	75939456	2	cg27631597,cg08604223	Body,Body	_,_	IQGAP2,IQGAP2	NM_006633,NM_006633
5	77181953	77182047	3	cg02455471,cg07743117,cg19489705	_,_	N_Shore,N_Shore,N_Shore	_,_	_,_
5	80632033	80632231	2	cg01241390,cg05175337	Body;Body;TSS1500;TSS1500;TSS1500,Body;Body;TSS1500;TSS1500;TSS1500	N_Shore,N_Shore	RNU5E;RNU5D;ZCCHC9;ZCCHC9;ZCCHC9,RNU5E;RNU5D;ZCCHC9;ZCCHC9;ZCCHC9	NR_002754;NR_002755;NM_032280;NM_001131036;NM_001131035,NR_002754;NR_002755;NM_032280;NM_001131036;NM_001131035
5	101146983	101147665	4	cg17598923,cg18665594,cg10455971,cg12197752	_,_	_,_	_,_	_,_
5	112225763	112225921	2	cg04114590,cg10460168	Body,Body	S_Shore,S_Shore	SRP19,SRP19	NM_003135,NM_003135
5	112852513	112852599	3	cg08759041,cg21806985,cg12855547	TSS200,TSS200,TSS200	S_Shore,S_Shore,S_Shore	MCC,MCC,MCC	NM_001085377,NM_001085377,NM_001085377
5	113418450	113418781	2	cg05495546,cg26792821	_,_	N_Shore,N_Shore	_,_	_,_
5	114542616	114542798	2	cg07469926,cg14132888	Body;Body;Body,Body;Body;Body	Island,Island	TRIM36;TRIM36;TRIM36,TRIM36;TRIM36;TRIM36	NM_018700;NM_001017397;NM_001017398,NM_018700;NM_001017397;NM_001017398
5	114966288	114966358	3	cg21611170,cg08675743,cg15395441	Body;TSS1500;Body,Body;TSS1500;Body,Body;TSS1500;Body	S_Shore,S_Shore,S_Shore	TMED7-TICAM2;TICAM2;TMED7-TICAM2,TMED7-TICAM2;TICAM2;TMED7-TICAM2,TMED7-TICAM2;TICAM2;TMED7-TICAM2	NM_001164468;NM_021649;NM_001164469,NM_001164468;NM_021649;NM_001164469,NM_001164468;NM_021649;NM_001164469
5	125957031	125957570	3	cg00997655,cg22547559,cg03409151	Body,Body,Body	N_Shore,N_Shore,N_Shore	ALDH7A1,ALDH7A1,ALDH7A1	NM_001182,NM_001182,NM_001182
5	125964015	125964045	2	cg00084643,cg17010657	TSS1500,TSS1500	N_Shore,N_Shore	PHAX,PHAX	NM_032177,NM_032177
5	126082037	126082050	2	cg05029100,cg22618924	_,_	_,_	_,_	_,_
5	126436655	126437452	11	cg14340928,cg17848407,cg18710053,cg27097438,cg22905511,cg02304092,cg21113900,cg15405432,cg05001932,cg26972554,cg11850276	5UTR;5UTR,5UTR;5UTR,5UTR;5UTR,5UTR;1stExon;5UTR;1stExon,TSS200;TSS200,TSS200;TSS200,TSS200;TSS200,TSS200;TSS200,TSS200;TSS200,TSS1500;TSS1500,TSS1500;TSS1500	N_Shore,N_Shore,Island,Island,Island,Island,Island,Island,S_Shore,S_Shore,S_Shore	FLJ44606;FLJ44606,FLJ44606;FLJ44606,FLJ44606;FLJ44606,FLJ44606;FLJ44606;FLJ44606;FLJ44606,FLJ44606;FLJ44606,FLJ44606;FLJ44606,FLJ44606;FLJ44606,FLJ44606;FLJ44606,FLJ44606;FLJ44606,FLJ44606;FLJ44606,FLJ44606;FLJ44606	NM_001164478;NM_001164479,NM_001164478;NM_001164479,NM_001164478;NM_001164479,NM_001164478;NM_001164479;NM_001164479;NM_001164478,NM_001164478;NM_001164479,NM_001164478;NM_001164479,NM_001164478;NM_001164479,NM_001164478;NM_001164479,NM_001164478;NM_001164479,NM_001164479;NM_001164478,NM_001164479;NM_001164478
5	127899936	127900228	3	cg04093645,cg15358549,cg26802026	Body,Body,Body	Island,Island,N_Shore	FBN2,FBN2,FBN2	NM_001999,NM_001999,NM_001999
5	132176078	132176605	2	cg22109708,cg11714972	TSS1500,TSS1500	N_Shore,N_Shore	ANKRD43,ANKRD43	NM_175873,NM_175873
5	134900509	134900856	4	cg13336665,cg24899138,cg18362330,cg08285915	TSS1500,TSS1500,TSS1500,TSS1500	S_Shore,S_Shore,S_Shore,S_Shore	NEUROG1,NEUROG1,NEUROG1,NEUROG1	NM_006161,NM_006161,NM_006161,NM_006161
5	135391959	135392248	2	cg10187927,cg09584591	TSS1500,TSS1500	N_Shore,N_Shore	TGFBI,TGFBI	NM_000358,NM_000358
5	137715956	137715989	2	cg19076659,cg05722427	TSS1500,TSS200	N_Shore,N_Shore	KDM3B,KDM3B	NM_016604,NM_016604
5	137905699	137905784	2	cg23057943,cg18920976	Body,Body	N_Shore,N_Shore	ETF1,ETF1	NM_004730,NM_004730
5	138640885	138640929	2	cg15962267,cg20385395	Body;TSS1500;5UTR,Body;TSS1500;5UTR	S_Shelf,S_Shelf	SNHG4;SNORA74A;MATR3,SNHG4;SNORA74A;MATR3	NR_003141;NR_002915;NM_199189,NR_003141;NR_002915;NM_199189
5	139027923	139028332	4	cg24119607,cg07558472,cg26301389,cg07354506	5UTR,5UTR,5UTR,5UTR	N_Shore,Island,Island,Island	CXXC5,CXXC5,CXXC5,CXXC5	NM_016463,NM_016463,NM_016463,NM_016463
5	139998828	139998998	2	cg22721796,cg07780669	TSS1500,TSS200	N_Shore,N_Shore	TMCO6,TMCO6	NM_018502,NM_018502
5	141011479	141011627	2	cg23373626,cg01208614	TSS1500,TSS1500	S_Shore,S_Shore	FCHSD1,FCHSD1	NM_033449,NM_033449
5	141112777	141113576	4	cg25223623,cg02026608,cg21817858,cg20707023	_,_	N_Shore,Island,Island,S_Shore	_,_	_,_
5	142760447	142760886	2	cg17342132,cg08845721	Body;Body;Body;Body;Body;Body;Body,5UTR;5UTR;5UTR;5UTR;5UTR;5UTR;5UTR	N_Shore,N_Shore	NR3C1;NR3C1;NR3C1;NR3C1;NR3C1;NR3C1;NR3C1,NR3C1;NR3C1;NR3C1;NR3C1;NR3C1;NR3C1;NR3C1	NM_001018076;NM_000176;NM_001024094;NM_001020825;NM_001018075;NM_001018077;NM_001018074,NM_001018076;NM_001020825;NM_000176;NM_001018075;NM_001018077;NM_001024094;NM_001018074	hypo.chimp
5	1299291	1300290	2	cg05867884,cg15179011	3UTR,_	Island,S_Shore	SLC6A18,_	NM_182632,_
5	1433611	1433759	3	cg08609839,cg24767731,cg23506313	_,_	_,_	_,_	_,_
5	1686830	1687218	2	cg18250340,cg15951280	Body,TSS200	N_Shore,Island	LOC728613,LOC728613	NR_003713,NR_003713
5	1694619	1694876	2	cg01314810,cg18256985	_,_	N_Shelf,N_Shelf	_,_	_,_
5	1720958	1721417	3	cg26195683,cg16179300,cg14501596	_,_	Island,Island,S_Shore	_,_	_,_
5	1725612	1726510	4	cg03823863,cg15126021,cg12884551,cg25631739	_,_	_,_	_,_	_,_
5	1777892	1778285	3	cg03494017,cg25416334,cg26805720	_,_	N_Shore,Island,Island	_,_	_,_
5	5192510	5192643	4	cg10881764,cg07834743,cg01085224,cg19813025	TSS1500,TSS1500,TSS1500,TSS1500	Island,Island,Island,Island	ADAMTS16,ADAMTS16,ADAMTS16,ADAMTS16	NM_139056,NM_139056,NM_139056,NM_139056
5	5625550	5625628	2	cg26331096,cg12518844	_,_	_,_	_,_	_,_
5	6544754	6545253	3	cg22136403,cg16612423,cg07895206	3UTR,3UTR,3UTR	_,_	UBE2QL1,UBE2QL1,UBE2QL1	NM_001145161,NM_001145161,NM_001145161	hyper.chimp
5	7902836	7903327	2	cg21088420,cg01759761	Body,Body	N_Shore,Island	C5orf49,C5orf49	NM_001089584,NM_001089584	hyper.chimp
5	9600825	9601098	2	cg18334392,cg00722631	TSS1500,TSS1500	S_Shore,S_Shore	SNORD123,SNORD123	NR_003689,NR_003689	hyper.chimp
5	10494490	10494543	2	cg02227605,cg23025223	TSS1500,TSS1500	N_Shore,N_Shore	ROPN1L,ROPN1L	NM_031916,NM_031916	hyper.chimp
5	11438821	11438893	2	cg19438860,cg19576843	Body,Body	S_Shore,S_Shore	CTNND2,CTNND2	NM_001332,NM_001332	hyper.chimp
5	14161369	14161432	2	cg09457131,cg16016281	_,_	_,_	_,_	_,_	hyper.chimp
5	16561920	16562123	2	cg02729303,cg15525848	Body;1stExon;5UTR,Body;TSS200	_,_	FAM134B;FAM134B;FAM134B,FAM134B;FAM134B	NM_001034850;NM_019000;NM_019000,NM_001034850;NM_019000
5	23542495	23542787	2	cg04362002,cg10589310	TSS1500,TSS1500	_,_	PRDM9,PRDM9	NM_020227,NM_020227
5	27508277	27508299	2	cg08221830,cg02003460	_,_	_,_	_,_	_,_
5	30465086	30465190	2	cg00589791,cg18793886	_,_	_,_	_,_	_,_
5	35974432	35974449	2	cg02273827,cg24202119	1stExon;5UTR;5UTR,1stExon;5UTR;5UTR	_,_	CAPSL;CAPSL;CAPSL,CAPSL;CAPSL;CAPSL	NM_001042625;NM_144647;NM_001042625,NM_001042625;NM_144647;NM_001042625
5	36728825	36728915	2	cg08966624,cg18382753	_,_	S_Shelf,S_Shelf	_,_	_,_
5	38882455	38882500	2	cg05955210,cg22473846	5UTR;5UTR,5UTR;5UTR	S_Shore,S_Shore	OSMR;OSMR,OSMR;OSMR	NM_001168355;NM_003999,NM_001168355;NM_003999
5	40877055	40877347	4	cg01784614,cg26818786,cg16250754,cg05981038	TSS200,1stExon,1stExon,1stExon	_,_	CARD6,CARD6,CARD6,CARD6	NM_032587,NM_032587,NM_032587,NM_032587
5	41545109	41545833	2	cg05366204,cg21580846	Body,Body	N_Shore,Island	PLCXD3,PLCXD3	NM_001005473,NM_001005473
5	42792608	42792928	4	cg23688479,cg08952407,cg12585923,cg21929564	TSS200,TSS200,TSS200,5UTR	_,_	CCDC152,CCDC152,CCDC152,CCDC152	NM_001134848,NM_001134848,NM_001134848,NM_001134848	hyper.chimp
5	43080330	43081312	5	cg18254356,cg23435915,cg21245816,cg24921186,cg17427675	Body,Body,Body,Body,_	S_Shore,S_Shore,S_Shore,S_Shore,S_Shelf	LOC153684,LOC153684,LOC153684,LOC153684,_	NR_015447,NR_015447,NR_015447,NR_015447,_	hyper.chimp
5	55153506	55153722	2	cg09165004,cg11182518	_,_	Island,Island	_,_	_,_	hyper.chimp
5	61064022	61064656	5	cg10932486,cg10166889,cg01781963,cg11246233,cg26155338	_,_	_,_	_,_	_,_	hyper.chimp
5	63291443	63291644	2	cg05040472,cg01020744	_,_	N_Shore,N_Shore	_,_	_,_	hyper.chimp
5	63293255	63293697	10	cg04427003,cg04694812,cg02266732,cg16280141,cg08259925,cg09698471,cg11615755,cg15092168,cg07839533,cg13666507	1stExon,TSS200,TSS200,TSS1500,TSS1500,TSS1500,TSS1500,TSS1500,TSS1500,TSS1500	Island,Island,Island,Island,Island,Island,Island,Island,Island,S_Shore	HTR1A,HTR1A,HTR1A,HTR1A,HTR1A,HTR1A,HTR1A,HTR1A,HTR1A,HTR1A	NM_000524,NM_000524,NM_000524,NM_000524,NM_000524,NM_000524,NM_000524,NM_000524,NM_000524,NM_000524	hyper.chimp
5	66497640	66498418	4	cg03883572,cg25399309,cg08743751,cg17278401	Body;Body,Body;Body,Body;Body,Body;Body	S_Shelf,S_Shelf,S_Shelf,S_Shelf	MAST4;MAST4,MAST4;MAST4,MAST4;MAST4,MAST4;MAST4	NM_015183;NM_001164664,NM_015183;NM_001164664,NM_015183;NM_001164664,NM_015183;NM_001164664	hyper.chimp
5	68823452	68823516	2	cg17818912,cg17772163	TSS1500,TSS1500	N_Shore,N_Shore	OCLN,OCLN	NM_002538,NM_002538	hyper.chimp
5	71050613	71050656	2	cg26371061,cg20798152	TSS200,TSS200	N_Shore,N_Shore	CARTPT,CARTPT	NM_004291,NM_004291	hyper.chimp
5	72451443	72451526	2	cg14617041,cg15518950	TSS1500;TSS1500,TSS1500;TSS1500	Island,Island	TMEM171;TMEM171,TMEM171;TMEM171	NM_001161342;NM_173490,NM_001161342;NM_173490	hyper.chimp
5	72545974	72547168	4	cg03317642,cg06679694,cg11937107,cg25016544	_,_	N_Shore,N_Shore,N_Shore,N_Shore	_,_	_,_	hyper.chimp
5	74943348	74943926	5	cg08253296,cg07671805,cg02573091,cg19683494,cg00601450	_,_	Island,Island,S_Shore,S_Shore,S_Shore	_,_	_,_	hyper.chimp
5	76824302	76824351	2	cg14666655,cg02017109	TSS1500,TSS1500	S_Shore,S_Shore	WDR41,WDR41	NM_018268,NM_018268	hyper.chimp
5	77175144	77175248	2	cg03619568,cg24853438	_,_	N_Shore,N_Shore	_,_	_,_	hyper.chimp
5	77841925	77842294	3	cg01283201,cg00869417,cg06759890	5UTR,5UTR,5UTR	Island,Island,S_Shore	LHFPL2,LHFPL2,LHFPL2	NM_005779,NM_005779,NM_005779
5	78317490	78317583	4	cg02582925,cg11541897,cg18828365,cg17845680	1stExon;1stExon;5UTR;5UTR,TSS200;1stExon;5UTR,TSS200;1stExon;5UTR,TSS200;1stExon;5UTR	S_Shore,S_Shore,S_Shore,S_Shore	ARSB;ARSB;ARSB;ARSB,ARSB;ARSB;ARSB,ARSB;ARSB;ARSB,ARSB;ARSB;ARSB	NM_198709;NM_000046;NM_198709;NM_000046,NM_198709;NM_000046;NM_000046,NM_198709;NM_000046;NM_000046,NM_198709;NM_000046;NM_000046	hyper.chimp
5	79588293	79589023	2	cg26908328,cg19683073	TSS1500,TSS1500	S_Shore,S_Shore	SERINC5,SERINC5	NM_178276,NM_178276	hyper.chimp
5	80564365	80564454	2	cg22979433,cg25479732	Body;Body;TSS1500;TSS1500;TSS1500,Body;Body;TSS1500;TSS1500;TSS1500	_,_	RNU5E;RNU5D;CKMT2;CKMT2;CKMT2,RNU5E;RNU5D;CKMT2;CKMT2;CKMT2	NR_002754;NR_002755;NM_001099735;NM_001825;NM_001099736,NR_002754;NR_002755;NM_001099735;NM_001825;NM_001099736	hyper.chimp
5	88053647	88054361	4	cg05654946,cg24831051,cg17245135,cg06040811	3UTR;3UTR,Body;Body,Body;Body,Body;Body	_,_	MEF2C;MEF2C,MEF2C;MEF2C,MEF2C;MEF2C,MEF2C;MEF2C	NM_002397;NM_001131005,NM_001131005;NM_002397,NM_001131005;NM_002397,NM_001131005;NM_002397	hyper.chimp
5	95008086	95008805	7	cg19108718,cg15875068,cg18347650,cg07015725,cg12628956,cg10927068,cg12967370	TSS200;TSS1500;TSS1500,TSS200;TSS200;TSS200,TSS200;TSS200;TSS200,TSS200;TSS200;5UTR,5UTR;5UTR;1stExon;1stExon;5UTR,5UTR;5UTR;1stExon;1stExon;5UTR,5UTR;5UTR;1stExon;1stExon;5UTR	Island,Island,Island,Island,Island,S_Shore,S_Shore	RFESD;RFESD;RFESD,RFESD;RFESD;RFESD,RFESD;RFESD;RFESD,RFESD;RFESD;RFESD,RFESD;RFESD;RFESD;RFESD;RFESD,RFESD;RFESD;RFESD;RFESD;RFESD,RFESD;RFESD;RFESD;RFESD;RFESD	NM_001131066;NM_173362;NM_001131065,NM_001131066;NM_173362;NM_001131065,NM_001131066;NM_173362;NM_001131065,NM_173362;NM_001131065;NM_001131066,NM_001131065;NM_001131066;NM_001131065;NM_173362;NM_173362,NM_001131065;NM_001131066;NM_001131065;NM_173362;NM_173362,NM_001131065;NM_001131066;NM_001131065;NM_173362;NM_173362	hyper.chimp
5	99898786	99899582	6	cg05958659,cg21509130,cg01236506,cg13883256,cg17025142,cg07617175	TSS1500,TSS200,5UTR;1stExon,1stExon,1stExon,Body	N_Shore,Island,Island,Island,Island,Island	FAM174A,FAM174A,FAM174A;FAM174A,FAM174A,FAM174A,FAM174A	NM_198507,NM_198507,NM_198507;NM_198507,NM_198507,NM_198507,NM_198507
5	101660271	101660458	2	cg11009817,cg12864568	TSS200,TSS1500	Island,S_Shore	SLCO4C1,SLCO4C1	NM_180991,NM_180991
5	112658889	112658951	2	cg22149359,cg06512849	TSS1500;Body,TSS1500;Body	S_Shore,S_Shore	MCC;MCC,MCC;MCC	NM_002387;NM_001085377,NM_002387;NM_001085377
5	114626745	114626768	2	cg08987989,cg04000474	TSS1500,TSS1500	S_Shore,S_Shore	PGGT1B,PGGT1B	NM_005023,NM_005023
5	114965434	114965818	3	cg16464045,cg18098750,cg22173752	Body;5UTR;Body,Body;5UTR;Body,Body;1stExon;5UTR;Body	N_Shore,Island,Island	TMED7-TICAM2;TICAM2;TMED7-TICAM2,TMED7-TICAM2;TICAM2;TMED7-TICAM2,TMED7-TICAM2;TICAM2;TICAM2;TMED7-TICAM2	NM_001164468;NM_021649;NM_001164469,NM_001164468;NM_021649;NM_001164469,NM_001164468;NM_021649;NM_021649;NM_001164469	hyper.chimp
5	115725269	115725487	3	cg11312495,cg15203566,cg01145903	_,_	Island,Island,Island	_,_	_,_	hyper.chimp
5	126592505	126592641	3	cg07897069,cg03602014,cg00064778	_,_	N_Shore,N_Shore,N_Shore	_,_	_,_	hyper.chimp
5	131733139	131733965	2	cg24060327,cg16647868	TSS200,Body	Island,S_Shore	SLC22A5,SLC22A5	NM_003060,NM_003060	hyper.chimp
5	133369266	133369811	3	cg22691725,cg25141995,cg17508274	TSS1500,TSS1500,TSS1500	Island,Island,S_Shore	VDAC1,VDAC1,VDAC1	NM_003374,NM_003374,NM_003374	hyper.chimp
5	133477441	133477550	2	cg02148787,cg24093411	TSS1500,TSS1500	Island,Island	TCF7,TCF7	NM_003202,NM_003202	hyper.chimp
5	134238606	134238738	2	cg00046537,cg22570053	Body,Body	S_Shore,S_Shore	TXNDC15,TXNDC15	NM_024715,NM_024715	hyper.chimp
5	138742035	138742236	2	cg26929925,cg11459648	Body;Body,Body;Body	Island,Island	SLC23A1;SLC23A1,SLC23A1;SLC23A1	NM_152685;NM_005847,NM_152685;NM_005847	hyper.chimp
5	138877978	138878158	2	cg02650972,cg01309855	_,_	Island,Island	_,_	_,_	hyper.chimp
5	139148213	139148507	2	cg08911048,cg21211253	_,_	Island,S_Shore	_,_	_,_	hyper.chimp
5	139662959	139663367	2	cg02707576,cg19622675	TSS200,TSS1500	_,_	PFDN1,PFDN1	NM_002622,NM_002622	hyper.chimp
5	139917130	139917534	2	cg26197690,cg02434007	Body,1stExon;5UTR	Island,S_Shore	SRA1,SRA1;SRA1	NM_001035235,NM_001035235;NM_001035235
5	139998893	139999707	2	cg15646382,cg20540806	TSS1500,Body	N_Shore,S_Shore	TMCO6,TMCO6	NM_018502,NM_018502
5	140145871	140146182	2	cg12150457,cg09032973	TSS200;TSS200;TSS200,1stExon;1stExon;1stExon	N_Shore,Island	PCDHA1;PCDHA1;PCDHA1,PCDHA1;PCDHA1;PCDHA1	NM_031411;NM_018900;NM_031410,NM_031410;NM_031411;NM_018900
5	140161105	140161110	2	cg11429969,cg08288811	Body;Body;1stExon;1stExon;Body,Body;Body;1stExon;1stExon;Body	Island,Island	PCDHA2;PCDHA1;PCDHA3;PCDHA3;PCDHA1,PCDHA2;PCDHA1;PCDHA3;PCDHA3;PCDHA1	NM_018905;NM_031411;NM_031497;NM_018906;NM_018900,NM_018905;NM_031411;NM_031497;NM_018906;NM_018900
5	140166764	140167424	4	cg26282566,cg03897860,cg17777676,cg19852211	Body;Body;Body;TSS200;Body;TSS200,Body;Body;Body;1stExon;Body;1stExon;5UTR;5UTR,Body;Body;Body;1stExon;Body;1stExon,Body;Body;Body;1stExon;Body;1stExon	N_Shore,N_Shore,Island,Island	PCDHA2;PCDHA1;PCDHA1;PCDHA4;PCDHA3;PCDHA4,PCDHA2;PCDHA1;PCDHA1;PCDHA4;PCDHA3;PCDHA4;PCDHA4;PCDHA4,PCDHA2;PCDHA1;PCDHA1;PCDHA4;PCDHA3;PCDHA4,PCDHA2;PCDHA1;PCDHA1;PCDHA4;PCDHA3;PCDHA4	NM_018905;NM_031411;NM_018900;NM_018907;NM_018906;NM_031500,NM_018905;NM_031411;NM_018900;NM_031500;NM_018906;NM_018907;NM_031500;NM_018907,NM_018905;NM_031411;NM_018900;NM_018907;NM_018906;NM_031500,NM_018905;NM_031411;NM_018900;NM_018907;NM_018906;NM_031500
5	140201541	140201548	2	cg00504705,cg19596110	Body;Body;Body;Body;Body;1stExon;Body;Body;1stExon;Body;Body,Body;Body;Body;Body;Body;1stExon;Body;Body;1stExon;Body;Body	Island,Island	PCDHA6;PCDHA2;PCDHA1;PCDHA7;PCDHA1;PCDHA8;PCDHA6;PCDHA5;PCDHA8;PCDHA3;PCDHA4,PCDHA6;PCDHA2;PCDHA1;PCDHA7;PCDHA1;PCDHA8;PCDHA6;PCDHA5;PCDHA8;PCDHA3;PCDHA4	NM_031849;NM_018905;NM_031411;NM_018910;NM_018900;NM_018911;NM_018909;NM_018908;NM_031856;NM_018906;NM_018907,NM_031849;NM_018905;NM_031411;NM_018910;NM_018900;NM_018911;NM_018909;NM_018908;NM_031856;NM_018906;NM_018907
5	140215619	140216265	7	cg18283342,cg11595575,cg10519368,cg13592931,cg14676529,cg19810034,cg02829712	Body;Body;Body;Body;Body;Body;Body;TSS200;Body;Body;Body;TSS200;TSS200;Body,Body;Body;Body;Body;Body;Body;Body;TSS200;Body;Body;Body;TSS200;TSS200;Body,Body;Body;Body;Body;Body;Body;Body;TSS200;Body;Body;Body;TSS200;TSS200;Body,Body;Body;Body;Body;Body;Body;Body;TSS200;Body;Body;Body;TSS200;TSS200;Body,Body;Body;Body;Body;Body;Body;Body;TSS200;Body;Body;Body;TSS200;TSS200;Body,Body;Body;Body;1stExon;Body;Body;Body;Body;Body;Body;Body;1stExon;1stExon;Body,Body;Body;Body;1stExon;Body;Body;Body;Body;Body;Body;Body;1stExon;1stExon;Body	N_Shore,N_Shore,N_Shore,N_Shore,N_Shore,Island,N_Shore	PCDHA6;PCDHA2;PCDHA1;PCDHA9;PCDHA7;PCDHA1;PCDHA6;PCDHA10;PCDHA5;PCDHA3;PCDHA4;PCDHA10;PCDHA10;PCDHA8,PCDHA6;PCDHA2;PCDHA1;PCDHA9;PCDHA7;PCDHA1;PCDHA6;PCDHA10;PCDHA5;PCDHA3;PCDHA4;PCDHA10;PCDHA10;PCDHA8,PCDHA6;PCDHA2;PCDHA1;PCDHA9;PCDHA7;PCDHA1;PCDHA6;PCDHA10;PCDHA5;PCDHA3;PCDHA4;PCDHA10;PCDHA10;PCDHA8,PCDHA6;PCDHA2;PCDHA1;PCDHA9;PCDHA7;PCDHA1;PCDHA6;PCDHA10;PCDHA5;PCDHA3;PCDHA4;PCDHA10;PCDHA10;PCDHA8,PCDHA6;PCDHA2;PCDHA1;PCDHA9;PCDHA7;PCDHA1;PCDHA6;PCDHA10;PCDHA5;PCDHA3;PCDHA4;PCDHA10;PCDHA10;PCDHA8,PCDHA6;PCDHA2;PCDHA1;PCDHA10;PCDHA9;PCDHA7;PCDHA1;PCDHA6;PCDHA5;PCDHA3;PCDHA4;PCDHA10;PCDHA10;PCDHA8,PCDHA6;PCDHA2;PCDHA1;PCDHA10;PCDHA9;PCDHA7;PCDHA1;PCDHA6;PCDHA5;PCDHA3;PCDHA4;PCDHA10;PCDHA10;PCDHA8	NM_031849;NM_018905;NM_031411;NM_031857;NM_018910;NM_018900;NM_018909;NM_031860;NM_018908;NM_018906;NM_018907;NM_031859;NM_018901;NM_018911,NM_031849;NM_018905;NM_031411;NM_031857;NM_018910;NM_018900;NM_018909;NM_031860;NM_018908;NM_018906;NM_018907;NM_031859;NM_018901;NM_018911,NM_031849;NM_018905;NM_031411;NM_031857;NM_018910;NM_018900;NM_018909;NM_031860;NM_018908;NM_018906;NM_018907;NM_031859;NM_018901;NM_018911,NM_031849;NM_018905;NM_031411;NM_031857;NM_018910;NM_018900;NM_018909;NM_031860;NM_018908;NM_018906;NM_018907;NM_031859;NM_018901;NM_018911,NM_031849;NM_018905;NM_031411;NM_031857;NM_018910;NM_018900;NM_018909;NM_031860;NM_018908;NM_018906;NM_018907;NM_031859;NM_018901;NM_018911,NM_031849;NM_018905;NM_031411;NM_031860;NM_031857;NM_018910;NM_018900;NM_018909;NM_018908;NM_018906;NM_018907;NM_018901;NM_031859;NM_018911,NM_031849;NM_018905;NM_031411;NM_031860;NM_031857;NM_018910;NM_018900;NM_018909;NM_018908;NM_018906;NM_018907;NM_018901;NM_031859;NM_018911
5	140454585	140455278	4	cg23997185,cg19027827,cg24830494,cg02539074	1stExon,1stExon,1stExon,1stExon	N_Shore,N_Shore,N_Shore,N_Shore	PCDHB2,PCDHB2,PCDHB2,PCDHB2	NM_018936,NM_018936,NM_018936,NM_018936
5	140460163	140460167	2	cg18782991,cg02125910	TSS1500,TSS1500	N_Shore,N_Shore	PCDHB3,PCDHB3	NM_018937,NM_018937
5	140532337	140532347	2	cg24168884,cg25412979	TSS200,TSS200	N_Shore,N_Shore	PCDHB7,PCDHB7	NM_018940,NM_018940
5	140568323	140568565	3	cg15548198,cg17047981,cg19727817	TSS200,TSS200,5UTR;1stExon	N_Shore,N_Shore,N_Shore	PCDHB12,PCDHB12,PCDHB12;PCDHB12	NM_018932,NM_018932,NM_018932;NM_018932	hyper.chimp
5	140605053	140605424	8	cg03572772,cg17023770,cg18664869,cg11368643,cg24951286,cg23941075,cg10757144,cg26380443	TSS1500,TSS1500,TSS200,TSS200,TSS200,TSS200,1stExon,1stExon	N_Shore,N_Shore,N_Shore,N_Shore,N_Shore,N_Shore,N_Shore,N_Shore	PCDHB15,PCDHB15,PCDHB15,PCDHB15,PCDHB15,PCDHB15,PCDHB15,PCDHB15	NM_018935,NM_018935,NM_018935,NM_018935,NM_018935,NM_018935,NM_018935,NM_018935	hyper.chimp
5	140686029	140686168	3	cg21930118,cg02151604,cg16467262	_,_	_,_	_,_	_,_	hyper.chimp
5	140709613	140710112	8	cg13048822,cg03447435,cg17557357,cg25592513,cg21161927,cg12375722,cg21073350,cg08714996	Body;Body;Body;TSS1500;TSS1500,Body;Body;Body;TSS1500;TSS1500,Body;Body;Body;TSS1500;TSS1500,Body;Body;Body;TSS1500;TSS1500,Body;TSS200;Body;TSS200;Body,Body;TSS200;Body;TSS200;Body,Body;TSS200;Body;TSS200;Body,1stExon;Body;Body;1stExon;Body	N_Shore,N_Shore,N_Shore,N_Shore,N_Shore,N_Shore,N_Shore,N_Shore	PCDHGA2;PCDHGA1;PCDHGA3;PCDHGB1;PCDHGB1,PCDHGA2;PCDHGA1;PCDHGA3;PCDHGB1;PCDHGB1,PCDHGA2;PCDHGA1;PCDHGA3;PCDHGB1;PCDHGB1,PCDHGA2;PCDHGA1;PCDHGA3;PCDHGB1;PCDHGB1,PCDHGA2;PCDHGB1;PCDHGA1;PCDHGB1;PCDHGA3,PCDHGA2;PCDHGB1;PCDHGA1;PCDHGB1;PCDHGA3,PCDHGA2;PCDHGB1;PCDHGA1;PCDHGB1;PCDHGA3,PCDHGB1;PCDHGA2;PCDHGA1;PCDHGB1;PCDHGA3	NM_018915;NM_018912;NM_018916;NM_018922;NM_032095,NM_018915;NM_018912;NM_018916;NM_018922;NM_032095,NM_018915;NM_018912;NM_018916;NM_018922;NM_032095,NM_018915;NM_018912;NM_018916;NM_018922;NM_032095,NM_018915;NM_032095;NM_018912;NM_018922;NM_018916,NM_018915;NM_032095;NM_018912;NM_018922;NM_018916,NM_018915;NM_032095;NM_018912;NM_018922;NM_018916,NM_018922;NM_018915;NM_018912;NM_032095;NM_018916	hyper.chimp
5	140838073	140838291	5	cg18858331,cg14672084,cg00589850,cg24024424,cg27639030	Body;Body;Body;Body;Body;Body;Body;Body;1stExon;Body;Body;Body;Body;Body;Body;Body;Body;Body;Body;Body;Body;1stExon;Body,Body;Body;Body;Body;Body;Body;Body;Body;1stExon;Body;Body;Body;Body;Body;Body;Body;Body;Body;Body;Body;Body;1stExon;Body,Body;Body;Body;Body;Body;Body;Body;Body;1stExon;Body;Body;Body;Body;Body;Body;Body;Body;Body;Body;Body;Body;1stExon;Body,Body;Body;Body;Body;Body;Body;Body;Body;1stExon;Body;Body;Body;Body;Body;Body;Body;Body;Body;Body;Body;Body;1stExon;Body,Body;Body;Body;Body;Body;Body;Body;Body;1stExon;Body;Body;Body;Body;Body;Body;Body;Body;Body;Body;Body;Body;1stExon;Body	Island,Island,Island,Island,S_Shore	PCDHGA4;PCDHGA12;PCDHGA11;PCDHGA11;PCDHGA9;PCDHGA1;PCDHGB1;PCDHGB6;PCDHGC3;PCDHGB3;PCDHGB7;PCDHGA6;PCDHGA8;PCDHGA10;PCDHGA5;PCDHGB4;PCDHGA3;PCDHGA2;PCDHGA7;PCDHGB2;PCDHGB5;PCDHGC3;PCDHGC3,PCDHGA4;PCDHGA12;PCDHGA11;PCDHGA11;PCDHGA9;PCDHGA1;PCDHGB1;PCDHGB6;PCDHGC3;PCDHGB3;PCDHGB7;PCDHGA6;PCDHGA8;PCDHGA10;PCDHGA5;PCDHGB4;PCDHGA3;PCDHGA2;PCDHGA7;PCDHGB2;PCDHGB5;PCDHGC3;PCDHGC3,PCDHGA4;PCDHGA12;PCDHGA11;PCDHGA11;PCDHGA9;PCDHGA1;PCDHGB1;PCDHGB6;PCDHGC3;PCDHGB3;PCDHGB7;PCDHGA6;PCDHGA8;PCDHGA10;PCDHGA5;PCDHGB4;PCDHGA3;PCDHGA2;PCDHGA7;PCDHGB2;PCDHGB5;PCDHGC3;PCDHGC3,PCDHGA4;PCDHGA12;PCDHGA11;PCDHGA11;PCDHGA9;PCDHGA1;PCDHGB1;PCDHGB6;PCDHGC3;PCDHGB3;PCDHGB7;PCDHGA6;PCDHGA8;PCDHGA10;PCDHGA5;PCDHGB4;PCDHGA3;PCDHGA2;PCDHGA7;PCDHGB2;PCDHGB5;PCDHGC3;PCDHGC3,PCDHGA4;PCDHGA12;PCDHGA11;PCDHGA11;PCDHGA9;PCDHGA1;PCDHGB1;PCDHGB6;PCDHGC3;PCDHGB3;PCDHGB7;PCDHGA6;PCDHGA8;PCDHGA10;PCDHGA5;PCDHGB4;PCDHGA3;PCDHGA2;PCDHGA7;PCDHGB2;PCDHGB5;PCDHGC3;PCDHGC3	NM_018917;NM_003735;NM_032092;NM_018914;NM_018921;NM_018912;NM_018922;NM_018926;NM_032402;NM_018924;NM_018927;NM_018919;NM_032088;NM_018913;NM_018918;NM_003736;NM_018916;NM_018915;NM_018920;NM_018923;NM_018925;NM_002588;NM_032403,NM_018917;NM_003735;NM_032092;NM_018914;NM_018921;NM_018912;NM_018922;NM_018926;NM_032402;NM_018924;NM_018927;NM_018919;NM_032088;NM_018913;NM_018918;NM_003736;NM_018916;NM_018915;NM_018920;NM_018923;NM_018925;NM_002588;NM_032403,NM_018917;NM_003735;NM_032092;NM_018914;NM_018921;NM_018912;NM_018922;NM_018926;NM_032402;NM_018924;NM_018927;NM_018919;NM_032088;NM_018913;NM_018918;NM_003736;NM_018916;NM_018915;NM_018920;NM_018923;NM_018925;NM_002588;NM_032403,NM_018917;NM_003735;NM_032092;NM_018914;NM_018921;NM_018912;NM_018922;NM_018926;NM_032402;NM_018924;NM_018927;NM_018919;NM_032088;NM_018913;NM_018918;NM_003736;NM_018916;NM_018915;NM_018920;NM_018923;NM_018925;NM_002588;NM_032403,NM_018917;NM_003735;NM_032092;NM_018914;NM_018921;NM_018912;NM_018922;NM_018926;NM_032402;NM_018924;NM_018927;NM_018919;NM_032088;NM_018913;NM_018918;NM_003736;NM_018916;NM_018915;NM_018920;NM_018923;NM_018925;NM_002588;NM_032403	hyper.chimp
5	140851340	140852518	5	cg04964031,cg24619378,cg16032518,cg17297238,cg12487901	Body;Body;Body;Body;Body;Body;Body;Body;1stExon;Body;Body;Body;Body;Body;Body;Body;Body;Body;Body;Body;Body;Body;1stExon;Body;Body,Body;Body;Body;Body;Body;Body;Body;Body;1stExon;Body;Body;Body;Body;Body;Body;Body;Body;Body;Body;Body;Body;Body;Body;Body;Body,Body;Body;Body;Body;Body;Body;Body;Body;Body;Body;Body;Body;Body;Body;Body;Body;Body;Body;Body;Body;Body;Body;Body;Body,Body;Body;Body;Body;Body;Body;Body;Body;Body;Body;Body;Body;Body;Body;Body;Body;Body;Body;Body;Body;Body;Body;Body;Body,Body;Body;Body;Body;Body;Body;Body;Body;Body;Body;Body;Body;Body;Body;Body;Body;Body;Body;Body;Body;Body;Body;Body;Body	Island,Island,Island,Island,Island	PCDHGA4;PCDHGC3;PCDHGA12;PCDHGA11;PCDHGA11;PCDHGA9;PCDHGA1;PCDHGB1;PCDHGC5;PCDHGB6;PCDHGB3;PCDHGB7;PCDHGA6;PCDHGA8;PCDHGA10;PCDHGA5;PCDHGB4;PCDHGC4;PCDHGA3;PCDHGA2;PCDHGA7;PCDHGB2;PCDHGC5;PCDHGB5;PCDHGC3,PCDHGA4;PCDHGC3;PCDHGA12;PCDHGA11;PCDHGA11;PCDHGA9;PCDHGA1;PCDHGB1;PCDHGC5;PCDHGB6;PCDHGB3;PCDHGB7;PCDHGA6;PCDHGA8;PCDHGA10;PCDHGA5;PCDHGB4;PCDHGC4;PCDHGA3;PCDHGA2;PCDHGA7;PCDHGB2;PCDHGC5;PCDHGB5;PCDHGC3,PCDHGA4;PCDHGC3;PCDHGA12;PCDHGA11;PCDHGA11;PCDHGA9;PCDHGA1;PCDHGB1;PCDHGB6;PCDHGB3;PCDHGB7;PCDHGA6;PCDHGA8;PCDHGA10;PCDHGA5;PCDHGB4;PCDHGC4;PCDHGA3;PCDHGA2;PCDHGA7;PCDHGB2;PCDHGC5;PCDHGB5;PCDHGC3,PCDHGA4;PCDHGC3;PCDHGA12;PCDHGA11;PCDHGA11;PCDHGA9;PCDHGA1;PCDHGB1;PCDHGB6;PCDHGB3;PCDHGB7;PCDHGA6;PCDHGA8;PCDHGA10;PCDHGA5;PCDHGB4;PCDHGC4;PCDHGA3;PCDHGA2;PCDHGA7;PCDHGB2;PCDHGC5;PCDHGB5;PCDHGC3,PCDHGA4;PCDHGC3;PCDHGA12;PCDHGA11;PCDHGA11;PCDHGA9;PCDHGA1;PCDHGB1;PCDHGB6;PCDHGB3;PCDHGB7;PCDHGA6;PCDHGA8;PCDHGA10;PCDHGA5;PCDHGB4;PCDHGC4;PCDHGA3;PCDHGA2;PCDHGA7;PCDHGB2;PCDHGC5;PCDHGB5;PCDHGC3	NM_018917;NM_002588;NM_003735;NM_032092;NM_018914;NM_018921;NM_018912;NM_018922;NM_032407;NM_018926;NM_018924;NM_018927;NM_018919;NM_032088;NM_018913;NM_018918;NM_003736;NM_018928;NM_018916;NM_018915;NM_018920;NM_018923;NM_018929;NM_018925;NM_032403,NM_018917;NM_002588;NM_003735;NM_032092;NM_018914;NM_018921;NM_018912;NM_018922;NM_032407;NM_018926;NM_018924;NM_018927;NM_018919;NM_032088;NM_018913;NM_018918;NM_003736;NM_018928;NM_018916;NM_018915;NM_018920;NM_018923;NM_018929;NM_018925;NM_032403,NM_018917;NM_002588;NM_003735;NM_032092;NM_018914;NM_018921;NM_018912;NM_018922;NM_018926;NM_018924;NM_018927;NM_018919;NM_032088;NM_018913;NM_018918;NM_003736;NM_018928;NM_018916;NM_018915;NM_018920;NM_018923;NM_018929;NM_018925;NM_032403,NM_018917;NM_002588;NM_003735;NM_032092;NM_018914;NM_018921;NM_018912;NM_018922;NM_018926;NM_018924;NM_018927;NM_018919;NM_032088;NM_018913;NM_018918;NM_003736;NM_018928;NM_018916;NM_018915;NM_018920;NM_018923;NM_018929;NM_018925;NM_032403,NM_018917;NM_002588;NM_003735;NM_032092;NM_018914;NM_018921;NM_018912;NM_018922;NM_018926;NM_018924;NM_018927;NM_018919;NM_032088;NM_018913;NM_018918;NM_003736;NM_018928;NM_018916;NM_018915;NM_018920;NM_018923;NM_018929;NM_018925;NM_032403	hyper.chimp
5	141328440	141328526	2	cg24777028,cg21867468	TSS1500;TSS1500;TSS1500;TSS1500;5UTR,TSS1500;TSS1500;TSS1500;TSS1500;5UTR	N_Shore,N_Shore	RNF14;RNF14;RNF14;RNF14;RNF14,RNF14;RNF14;RNF14;RNF14;RNF14	NM_183400;NM_183398;NM_004290;NM_183401;NM_183399,NM_183400;NM_183398;NM_004290;NM_183401;NM_183399	hyper.chimp
5	141596249	141596311	2	cg24749559,cg16704344	_,_	_,_	_,_	_,_	hyper.chimp
5	145693891	145694726	7	cg23174616,cg07353303,cg01142710,cg18274480,cg21214293,cg06030695,cg06577446	_,_	Island,Island,Island,Island,Island,S_Shore,S_Shore	_,_	_,_	hyper.chimp
5	148766495	148766570	2	cg02529358,cg01558401	TSS200,TSS200	_,_	LOC728264,LOC728264	NR_027180,NR_027180	hypo.chimp
5	148909078	148909545	3	cg25540816,cg17009869,cg11416874	Body;Body,Body;Body,Body;Body	N_Shore,N_Shore,N_Shore	CSNK1A1;CSNK1A1,CSNK1A1;CSNK1A1,CSNK1A1;CSNK1A1	NM_001025105;NM_001892,NM_001025105;NM_001892,NM_001025105;NM_001892	hypo.chimp
5	149490346	149490930	2	cg04841196,cg02414981	Body,Body	N_Shelf,N_Shore	PDGFRB,PDGFRB	NM_002609,NM_002609	hypo.chimp
5	149649561	149649681	3	cg10483275,cg03893692,cg27244482	5UTR;1stExon;5UTR;1stExon,TSS200;TSS200,TSS200;TSS200	_,_	CAMK2A;CAMK2A;CAMK2A;CAMK2A,CAMK2A;CAMK2A,CAMK2A;CAMK2A	NM_015981;NM_171825;NM_171825;NM_015981,NM_171825;NM_015981,NM_171825;NM_015981	hypo.chimp
5	149716956	149717059	2	cg19910648,cg03708230	TSS1500;TSS1500;TSS1500;TSS1500;TSS1500;TSS1500,TSS1500;TSS1500;TSS1500;TSS1500;TSS1500;TSS1500	N_Shore,N_Shore	TCOF1;TCOF1;TCOF1;TCOF1;TCOF1;TCOF1,TCOF1;TCOF1;TCOF1;TCOF1;TCOF1;TCOF1	NM_001008657;NM_001135244;NM_001135243;NM_001008656;NM_000356;NM_001135245,NM_001008657;NM_001135244;NM_001135243;NM_001008656;NM_000356;NM_001135245	hyper.chimp
5	149772442	149773033	6	cg19928046,cg14484145,cg24548564,cg18664712,cg16591228,cg11619961	1stExon;1stExon;1stExon,TSS200;TSS200;TSS200,TSS200;TSS200;TSS200,TSS200;TSS200;TSS200,TSS200;TSS200;TSS200,TSS1500;TSS1500;TSS1500	_,_	CD74;CD74;CD74,CD74;CD74;CD74,CD74;CD74;CD74,CD74;CD74;CD74,CD74;CD74;CD74,CD74;CD74;CD74	NM_001025158;NM_001025159;NM_004355,NM_004355;NM_001025158;NM_001025159,NM_004355;NM_001025158;NM_001025159,NM_004355;NM_001025158;NM_001025159,NM_004355;NM_001025158;NM_001025159,NM_004355;NM_001025158;NM_001025159	hyper.chimp
5	150119059	150119088	2	cg05973792,cg00245854	TSS1500;TSS1500;TSS1500,TSS1500;TSS1500;TSS1500	S_Shore,S_Shore	DCTN4;DCTN4;DCTN4,DCTN4;DCTN4;DCTN4	NM_016221;NM_001135644;NM_001135643,NM_016221;NM_001135644;NM_001135643	hyper.chimp
5	153762385	153762715	3	cg12847007,cg19601475,cg22023819	Body;TSS1500,Body;TSS1500,Body;TSS1500	N_Shelf,N_Shelf,N_Shelf	GALNT10;GALNT10,GALNT10;GALNT10,GALNT10;GALNT10	NM_198321;NM_017540,NM_198321;NM_017540,NM_198321;NM_017540	hypo.chimp
5	153853151	153853342	2	cg21964928,cg08414643	_,_	Island,Island	_,_	_,_	hyper.chimp
5	154051269	154051859	2	cg05212464,cg11923914	_,_	S_Shore,S_Shore	_,_	_,_	hyper.chimp
5	154072169	154072302	2	cg09088720,cg23613317	TSS1500,TSS1500	_,_	LARP1,LARP1	NM_015315,NM_015315	hyper.chimp
5	157011151	157011459	4	cg12606933,cg04897804,cg07484354,cg07025583	1stExon;1stExon,1stExon;1stExon,1stExon;1stExon,1stExon;1stExon	Island,Island,Island,Island	SOX30;SOX30,SOX30;SOX30,SOX30;SOX30,SOX30;SOX30	NM_007017;NM_178424,NM_007017;NM_178424,NM_007017;NM_178424,NM_007017;NM_178424	hyper.chimp
5	158690931	158691481	2	cg00066816,cg07622001	TSS1500,TSS1500	N_Shore,S_Shore	IL12B,IL12B	NM_002187,NM_002187	hyper.chimp
5	162819009	162819106	2	cg10153031,cg14872580	TSS1500;TSS1500;TSS1500;TSS1500;Body,TSS1500;TSS1500;TSS1500;TSS1500;Body	N_Shore,N_Shore	HMMR;HMMR;HMMR;HMMR;NUDCD2,HMMR;HMMR;HMMR;HMMR;NUDCD2	NM_001142556;NM_001142557;NM_012484;NM_012485;NM_145266,NM_001142556;NM_001142557;NM_012484;NM_012485;NM_145266	hyper.chimp
5	167114340	167114414	2	cg00045762,cg16434098	Body,Body	_,_	ODZ2,ODZ2	NM_001122679,NM_001122679	hypo.chimp
5	168661593	168661845	2	cg18669388,cg27132080	TSS1500,TSS1500	S_Shore,S_Shore	SLIT3,SLIT3	NM_003062,NM_003062	hypo.chimp
5	168662132	168662136	2	cg26570448,cg21545840	TSS1500,TSS1500	S_Shore,S_Shore	SLIT3,SLIT3	NM_003062,NM_003062	hyper.chimp
5	170103824	170104379	5	cg06980654,cg19011063,cg21677976,cg23221885,cg07756196	_,_	Island,Island,Island,Island,S_Shore	_,_	_,_	hyper.chimp
5	170221320	170221335	2	cg08358803,cg01579024	TSS1500,TSS1500	N_Shore,N_Shore	RANBP17,RANBP17	NM_022897,NM_022897	hypo.chimp
5	170696247	170696757	9	cg23036405,cg16025451,cg26497768,cg11611644,cg07682041,cg18275819,cg05995866,cg17255397,cg07418452	_,_	_,_	_,_	_,_	hyper.chimp
5	171027388	171027702	5	cg17535961,cg22006625,cg06635150,cg17024456,cg21490444	_,_	_,_	_,_	_,_	hyper.chimp
5	171548858	171549179	2	cg19782271,cg16675054	TSS1500,TSS1500	S_Shore,S_Shore	STK10,STK10	NM_005990,NM_005990	hyper.chimp
5	172107926	172108460	2	cg07450633,cg09464735	_,_	N_Shore,Island	_,_	_,_	hypo.chimp
5	172318247	172318283	2	cg24884145,cg23193410	Body;Body;TSS1500,Body;Body;TSS1500	Island,Island	LOC100268168;LOC100268168;RPL26L1,LOC100268168;LOC100268168;RPL26L1	NR_026682;NR_026683;NM_016093,NR_026682;NR_026683;NM_016093	hyper.chimp
5	172642966	172643667	4	cg12352302,cg02784694,cg22847391,cg03470094	_,_	N_Shore,N_Shore,Island,Island	_,_	_,_	hypo.chimp
5	173131053	173131208	2	cg11847956,cg10818423	_,_	_,_	_,_	_,_	hyper.chimp
5	173333309	173333343	2	cg19606776,cg25136605	_,_	_,_	_,_	_,_	hyper.chimp
5	173778786	173778914	2	cg12646385,cg14661385	_,_	_,_	_,_	_,_	hyper.chimp
5	174068177	174068367	2	cg09730930,cg07482257	_,_	_,_	_,_	_,_	hypo.chimp
5	175132521	175133160	5	cg00008488,cg10948790,cg12467264,cg02022425,cg04851169	_,_	N_Shore,N_Shore,N_Shore,Island,Island	_,_	_,_	hyper.chimp
5	175554001	175554015	2	cg06572420,cg02208657	_,_	Island,Island	_,_	_,_	hyper.chimp
5	176099360	176099586	2	cg11245681,cg26007189	_,_	N_Shelf,N_Shelf	_,_	_,_	hyper.chimp
5	176235519	176235582	2	cg25429640,cg17449197	Body,Body	N_Shelf,N_Shore	UNC5A,UNC5A	NM_133369,NM_133369	hypo.chimp
5	176381952	176382147	2	cg00127036,cg02530464	TSS1500,TSS200	N_Shore,Island	ZNF346,ZNF346	NM_012279,NM_012279	hyper.chimp
5	176476507	176476654	2	cg00169725,cg22186831	_,_	Island,Island	_,_	_,_	hyper.chimp
5	176869483	176869498	3	cg22108563,cg04131494,cg11463271	TSS200;5UTR;5UTR,TSS200;5UTR;5UTR,TSS200;5UTR;5UTR	_,_	DOK3;DOK3;DOK3,DOK3;DOK3;DOK3,DOK3;DOK3;DOK3	NM_024872;NM_001144876;NM_001144875,NM_024872;NM_001144876;NM_001144875,NM_024872;NM_001144876;NM_001144875	hyper.chimp
5	177303082	177303583	2	cg00549219,cg12513616	_,_	N_Shore,Island	_,_	_,_	hyper.chimp
5	178355769	178355915	2	cg17867333,cg08432971	TSS1500,TSS1500	S_Shore,S_Shore	GRM6,GRM6	NM_000843,NM_000843	hypo.chimp
5	178480469	178481306	4	cg09693926,cg10208897,cg02599361,cg25554190	Body,Body,Body,Body	Island,Island,Island,Island	ADAMTS2,ADAMTS2,ADAMTS2,ADAMTS2	NM_014244,NM_014244,NM_014244,NM_014244	hypo.chimp
5	178526703	178527132	2	cg16991765,cg21183664	Body;Body,Body;Body	Island,Island	ADAMTS2;ADAMTS2,ADAMTS2;ADAMTS2	NM_021599;NM_014244,NM_021599;NM_014244	hyper.chimp
5	178625297	178625412	3	cg01231141,cg10213542,cg06495631	Body;Body,Body;Body,Body;Body	_,_	ADAMTS2;ADAMTS2,ADAMTS2;ADAMTS2,ADAMTS2;ADAMTS2	NM_021599;NM_014244,NM_021599;NM_014244,NM_021599;NM_014244	hyper.chimp
5	178707366	178707798	2	cg01981048,cg20375093	_,_	S_Shore,S_Shelf	_,_	_,_	hyper.chimp
5	178981133	178981573	2	cg20740299,cg20773320	Body,Body	N_Shore,N_Shore	HNRNPH1,HNRNPH1	NM_005520,NM_005520	hypo.chimp
5	178983470	178984174	2	cg24635157,cg11517094	TSS200,TSS1500	Island,Island	HNRNPH1,HNRNPH1	NM_005520,NM_005520	hyper.chimp
5	179153151	179153696	5	cg16361890,cg26683398,cg09629657,cg12200124,cg11394785	TSS1500,TSS1500,TSS200,TSS200,1stExon	N_Shelf,N_Shelf,N_Shore,N_Shore,N_Shore	LTC4S,LTC4S,LTC4S,LTC4S,LTC4S	NM_145867,NM_145867,NM_145867,NM_145867,NM_145867	hypo.chimp
5	179176522	179177058	3	cg11250941,cg06861426,cg24421668	5UTR;5UTR,5UTR;5UTR,5UTR;5UTR	Island,Island,Island	SQSTM1;SQSTM1,SQSTM1;SQSTM1,SQSTM1;SQSTM1	NM_001142298;NM_001142299,NM_001142298;NM_001142299,NM_001142298;NM_001142299	hyper.chimp
5	179178607	179179200	3	cg17602756,cg01152073,cg15126957	5UTR;5UTR,5UTR;5UTR;TSS1500,5UTR;5UTR;TSS1500	N_Shore,N_Shore,N_Shore	SQSTM1;SQSTM1,SQSTM1;SQSTM1;SQSTM1,SQSTM1;SQSTM1;SQSTM1	NM_001142298;NM_001142299,NM_001142298;NM_001142299;NM_003900,NM_001142298;NM_001142299;NM_003900	hyper.chimp
5	179949801	179951101	8	cg26270345,cg00480161,cg13004587,cg16585682,cg18652367,cg07317366,cg09500443,cg10508993	3UTR,3UTR,Body,Body,Body,Body,5UTR;1stExon,TSS200	Island,Island,Island,Island,Island,Island,Island,Island	SCGB3A1,SCGB3A1,SCGB3A1,SCGB3A1,SCGB3A1,SCGB3A1,SCGB3A1;SCGB3A1,SCGB3A1	NM_052863,NM_052863,NM_052863,NM_052863,NM_052863,NM_052863,NM_052863;NM_052863,NM_052863
6	1254779	1255485	2	cg03283080,cg17842822	_,_	N_Shore,N_Shore	_,_	_,_
6	1345479	1346151	2	cg13602065,cg00394763	_,_	_,_	_,_	_,_
6	3008767	3009468	2	cg01606628,cg12534777	_,_	N_Shore,Island	_,_	_,_
6	3020351	3021353	4	cg05141867,cg24886867,cg24303123,cg04099420	_,TSS1500,TSS1500,TSS1500	_,_	_,RIPK1,RIPK1,RIPK1	_,NM_003804,NM_003804,NM_003804
6	6265323	6266363	8	cg16530177,cg27097018,cg24990131,cg14047667,cg04944873,cg01634141,cg03440267,cg20817661	5UTR,5UTR,5UTR,1stExon;5UTR,1stExon;5UTR,TSS200,TSS200,TSS1500	_,_	F13A1,F13A1,F13A1,F13A1;F13A1,F13A1;F13A1,F13A1,F13A1,F13A1	NM_000129,NM_000129,NM_000129,NM_000129;NM_000129,NM_000129;NM_000129,NM_000129,NM_000129,NM_000129	hyper.chimp
5	180163373	180163565	3	cg11316131,cg07137934,cg01835695	1stExon;5UTR;5UTR;5UTR;TSS1500;5UTR,5UTR;TSS200;TSS1500;5UTR;TSS200,5UTR;TSS200;TSS1500;5UTR;TSS200	S_Shore,S_Shore,S_Shore	MGAT1;MGAT1;MGAT1;MGAT1;MGAT1;MGAT1,MGAT1;MGAT1;MGAT1;MGAT1;MGAT1,MGAT1;MGAT1;MGAT1;MGAT1;MGAT1	NM_001114620;NM_001114618;NM_001114619;NM_001114620;NM_002406;NM_001114617,NM_001114618;NM_001114620;NM_002406;NM_001114617;NM_001114619,NM_001114618;NM_001114620;NM_002406;NM_001114617;NM_001114619	hypo.chimp
6	738567	738612	2	cg22983827,cg07247778	_,_	_,_	_,_	_,_	hypo.chimp
6	2787358	2787549	2	cg11393995,cg22977317	TSS1500,TSS1500	S_Shore,S_Shore	SERPINB1,SERPINB1	NM_030666,NM_030666	hypo.chimp
6	3225502	3225557	2	cg20346284,cg12034847	Body;Body,Body;Body	_,_	SLC22A23;SLC22A23,SLC22A23;SLC22A23	NM_021945;NM_015482,NM_021945;NM_015482	hypo.chimp
6	3688283	3688528	2	cg23736055,cg20867963	Body,Body	_,_	C6orf145,C6orf145	NM_183373,NM_183373	hypo.chimp
6	3795731	3795737	2	cg08550317,cg14275511	Body,Body	Island,Island	FAM50B,FAM50B	NM_012135,NM_012135	hypo.chimp
6	6491555	6492073	3	cg05215004,cg25649038,cg02249713	Body,Body,Body	Island,Island,Island	LOC285780,LOC285780,LOC285780	NR_026970,NR_026970,NR_026970	hyper.chimp
6	7205806	7206807	6	cg01785233,cg15365232,cg13323047,cg25155396,cg07357398,cg12668902	_,_	N_Shore,Island,Island,Island,Island,S_Shore	_,_	_,_	hyper.chimp
6	7932387	7932869	2	cg07242427,cg05191435	Body,Body	S_Shore,S_Shore	MGC26597,MGC26597	NR_027712,NR_027712	hypo.chimp
6	11035901	11035955	2	cg05658414,cg15032462	Body,Body	_,_	SYCP2L,SYCP2L	NM_001040274,NM_001040274	hypo.chimp
6	11151354	11151617	2	cg01799681,cg23642061	Body,Body	N_Shore,N_Shore	ELOVL2,ELOVL2	NM_017770,NM_017770	hyper.chimp
6	13536501	13536636	3	cg23336266,cg03606646,cg07113653	Body,Body,Body	_,_	GFOD1,GFOD1,GFOD1	NM_018988,NM_018988,NM_018988	hypo.chimp
6	15508441	15509046	2	cg20605134,cg22570970	Body,Body	_,_	JARID2,JARID2	NM_004973,NM_004973	hypo.chimp
6	18230944	18231143	2	cg06497198,cg18068140	TSS200,TSS1500	Island,S_Shore	NHLRC1,NHLRC1	NM_198586,NM_198586	hyper.chimp
6	25990442	25990569	3	cg03264133,cg12310025,cg03517284	_,_	Island,Island,S_Shore	_,_	_,_	hyper.chimp
6	26128677	26130252	11	cg15945016,cg26504026,cg08797106,cg18911592,cg18357526,cg11661250,cg02841227,cg11724671,cg25040670,cg21029201,cg27120683	TSS1500;TSS200,1stExon;TSS1500,1stExon;TSS1500,1stExon;TSS1500;3UTR,TSS200,TSS200,TSS200,1stExon,1stExon,1stExon,3UTR;1stExon	Island,Island,Island,N_Shore,N_Shore,N_Shore,N_Shore,Island,Island,Island,S_Shore	HIST1H4A;HIST1H3A,HIST1H3A;HIST1H4A,HIST1H3A;HIST1H4A,HIST1H3A;HIST1H4A;HIST1H3A,HIST1H4A,HIST1H4A,HIST1H4A,HIST1H4A,HIST1H4A,HIST1H4A,HIST1H4A;HIST1H4A	NM_003538;NM_003529,NM_003529;NM_003538,NM_003529;NM_003538,NM_003529;NM_003538;NM_003529,NM_003538,NM_003538,NM_003538,NM_003538,NM_003538,NM_003538,NM_003538;NM_003538	hyper.chimp
6	26151525	26153966	12	cg04800585,cg12588279,cg27635394,cg22478210,cg15387132,cg07701237,cg00779304,cg17432453,cg07636178,cg25438963,cg02677388,cg10199913	1stExon,1stExon,1stExon,TSS200,TSS1500;TSS1500,TSS1500;TSS1500,TSS1500;TSS1500,TSS200,TSS200,1stExon,1stExon,1stExon	N_Shore,N_Shore,N_Shore,N_Shore,Island,Island,N_Shore,N_Shore,N_Shore,Island,Island,Island	HIST1H2BB,HIST1H2BB,HIST1H2BB,HIST1H2BB,HIST1H2BB;HIST1H3C,HIST1H2BB;HIST1H3C,HIST1H2BB;HIST1H3C,HIST1H3C,HIST1H3C,HIST1H3C,HIST1H3C,HIST1H3C	NM_021062,NM_021062,NM_021062,NM_021062,NM_021062;NM_003531,NM_021062;NM_003531,NM_021062;NM_003531,NM_003531,NM_003531,NM_003531,NM_003531,NM_003531	hypo.chimp
6	26303467	26304773	6	cg01420254,cg02612650,cg08122386,cg03181300,cg06951627,cg03785755	_,_	N_Shore,N_Shore,N_Shore,N_Shore,N_Shore,N_Shore	_,_	_,_	hypo.chimp
6	26381349	26381380	2	cg12003026,cg21610164	1stExon,1stExon	Island,Island	HIST1H2BI,HIST1H2BI	NM_003525,NM_003525	hypo.chimp
6	26510289	26510755	3	cg26918792,cg15279766,cg01840268	TSS200;TSS200;TSS200;TSS200,1stExon;1stExon;5UTR;1stExon;5UTR;1stExon;5UTR;5UTR,5UTR;5UTR;5UTR;5UTR	_,_	BTN3A1;BTN3A1;BTN3A1;BTN3A1,BTN3A1;BTN3A1;BTN3A1;BTN3A1;BTN3A1;BTN3A1;BTN3A1;BTN3A1,BTN3A1;BTN3A1;BTN3A1;BTN3A1	NM_001145008;NM_194441;NM_001145009;NM_007048,NM_001145009;NM_194441;NM_001145008;NM_001145008;NM_007048;NM_007048;NM_194441;NM_001145009,NM_007048;NM_001145008;NM_194441;NM_001145009	hyper.chimp
6	26630115	26630557	3	cg20250722,cg15790214,cg22040809	Body,Body,Body	Island,Island,Island	HCG11,HCG11,HCG11	NR_026790,NR_026790,NR_026790	hyper.chimp
6	26767910	26767945	2	cg07314043,cg09595356	1stExon;5UTR,TSS200	Island,Island	ZNF322A;ZNF322A,ZNF322A	NM_024639;NM_024639,NM_024639
6	28166703	28167187	7	cg09156207,cg11517269,cg03597347,cg17849569,cg02631126,cg12740337,cg06952873	TSS1500,TSS200,TSS200,TSS200,TSS200,Body,Body	_,_	ZSCAN12L1,ZSCAN12L1,ZSCAN12L1,ZSCAN12L1,ZSCAN12L1,ZSCAN12L1,ZSCAN12L1	NR_024063,NR_024063,NR_024063,NR_024063,NR_024063,NR_024063,NR_024063
6	28554773	28555094	5	cg03350138,cg01792601,cg26968378,cg12584458,cg21903646	_,_	_,_	_,_	_,_
6	28709248	28709498	14	cg16731266,cg07017437,cg25653641,cg22572476,cg19488431,cg27535677,cg22497095,cg26865747,cg03759229,cg13565129,cg20851828,cg14654363,cg00990380,cg12763978	_,_	N_Shore,N_Shore,N_Shore,N_Shore,N_Shore,N_Shore,N_Shore,N_Shore,N_Shore,N_Shore,N_Shore,N_Shore,N_Shore,N_Shore	_,_	_,_
6	28710522	28710646	2	cg20379725,cg12430007	_,_	N_Shore,N_Shore	_,_	_,_
6	28772134	28772169	2	cg22452837,cg10582608	_,_	_,_	_,_	_,_
6	28939088	28940253	5	cg00903577,cg03615240,cg00934882,cg11274428,cg16206744	_,_	N_Shore,Island,S_Shore,S_Shore,S_Shore	_,_	_,_
6	29000397	29000444	2	cg05594872,cg23756442	TSS1500,TSS1500	S_Shore,S_Shore	TRIM27,TRIM27	NM_006510,NM_006510
6	29679053	29679342	2	cg27527874,cg18656132	3UTR;3UTR;3UTR,Body;Body;Body	_,_	GABBR1;GABBR1;GABBR1,GABBR1;GABBR1;GABBR1	NM_021904;NM_021903;NM_001470,NM_021904;NM_021903;NM_001470	hypo.chimp
6	27313795	27314890	4	cg20145610,cg14983586,cg26958615,cg26533311	_,_	_,_	_,_	_,_	hyper.chimp
6	27677650	27679072	4	cg13348458,cg18187198,cg09057517,cg07355745	_,_	_,_	_,_	_,_	hyper.chimp
6	28629775	28629866	5	cg27168780,cg05954411,cg21570182,cg11445094,cg16565902	_,_	_,_	_,_	_,_	hyper.chimp
6	28691950	28692443	17	cg01400884,cg12959558,cg01309870,cg04626491,cg09470274,cg20450471,cg09897374,cg00919411,cg15967709,cg03682719,cg20839206,cg22121557,cg03858673,cg24114014,cg04645150,cg11111740,cg10582827	_,_	Island,Island,Island,Island,Island,Island,Island,Island,Island,Island,Island,Island,Island,Island,Island,Island,S_Shore	_,_	_,_	hyper.chimp
6	28940337	28940550	2	cg07734926,cg23730781	_,_	S_Shore,S_Shore	_,_	_,_	hyper.chimp
6	29628506	29629782	9	cg24567537,cg11935738,cg08065408,cg09641376,cg06343355,cg18342026,cg26131286,cg21153898,cg26142965	_,_	N_Shore,N_Shore,N_Shore,N_Shore,N_Shore,N_Shore,Island,Island,Island	_,_	_,_	hyper.chimp
6	29701361	29702460	5	cg09577455,cg08027810,cg05115679,cg26129669,cg20486877	Body;Body;Body,Body;Body;Body,Body;Body;Body,Body;Body;Body,Body;Body;Body	N_Shore,N_Shore,N_Shore,N_Shore,N_Shore	GABBR1;GABBR1;GABBR1,GABBR1;GABBR1;GABBR1,GABBR1;GABBR1;GABBR1,GABBR1;GABBR1;GABBR1,GABBR1;GABBR1;GABBR1	NM_021904;NM_021903;NM_001470,NM_021904;NM_021903;NM_001470,NM_021904;NM_021903;NM_001470,NM_021904;NM_021903;NM_001470,NM_021904;NM_021903;NM_001470	hypo.chimp
6	29706264	29706674	5	cg14841796,cg08415141,cg09842161,cg20757073,cg21645752	Body;Body,Body;Body,Body;Body,Body;Body,Body;Body	N_Shore,N_Shore,N_Shore,N_Shore,N_Shore	GABBR1;GABBR1,GABBR1;GABBR1,GABBR1;GABBR1,GABBR1;GABBR1,GABBR1;GABBR1	NM_021904;NM_001470,NM_021904;NM_001470,NM_021904;NM_001470,NM_021904;NM_001470,NM_021904;NM_001470	hypo.chimp
6	29743137	29743671	2	cg02475474,cg00359010	3UTR;Body;3UTR;Body;Body;Body;Body;Body;Body;Body;Body,3UTR;Body;3UTR;Body;Body;Body;Body;Body;Body;Body;Body	_,_	MOG;MOG;MOG;MOG;MOG;MOG;MOG;MOG;MOG;MOG;MOG,MOG;MOG;MOG;MOG;MOG;MOG;MOG;MOG;MOG;MOG;MOG	NM_206813;NM_001170418;NM_206814;NM_206811;NM_206810;NM_206809;NM_001170417;NM_001008229;NM_001008228;NM_206812;NM_002433,NM_206813;NM_001170418;NM_206814;NM_206811;NM_206810;NM_206809;NM_001170417;NM_001008229;NM_001008228;NM_206812;NM_002433	hypo.chimp
6	29799705	29800260	4	cg17625506,cg19868007,cg20973396,cg11617938	Body;Body;Body,Body;Body;Body,Body;Body;Body,Body;Body;Body	Island,Island,Island,S_Shore	HLA-F;HLA-F;HLA-F,HLA-F;HLA-F;HLA-F,HLA-F;HLA-F;HLA-F,HLA-F;HLA-F;HLA-F	NM_001098478;NM_001098479;NM_018950,NM_001098478;NM_001098479;NM_018950,NM_001098478;NM_001098479;NM_018950,NM_001098478;NM_001098479;NM_018950	hyper.chimp
6	29868667	29868692	3	cg14652056,cg16640496,cg27012994	Body,Body,Body	Island,Island,Island	HCG4,HCG4,HCG4	NR_002139,NR_002139,NR_002139	hyper.chimp
6	29904084	29904473	2	cg00937691,cg13130352	Body,Body	Island,Island	HLA-G,HLA-G	NM_002127,NM_002127	hypo.chimp
6	29923784	29923881	3	cg24955682,cg11989485,cg25701100	_,_	N_Shelf,N_Shelf,N_Shelf	_,_	_,_	hyper.chimp
6	29963469	29964405	5	cg01362455,cg12481433,cg21549632,cg06902219,cg14245347	Body,Body,Body,Body,Body	Island,Island,Island,Island,Island	HLA-H,HLA-H,HLA-H,HLA-H,HLA-H	NR_001434,NR_001434,NR_001434,NR_001434,NR_001434	hyper.chimp
6	30001584	30003010	19	cg03876548,cg10595298,cg04227238,cg25644740,cg15070894,cg04520169,cg23237314,cg20341836,cg20464195,cg18741404,cg27146486,cg11533881,cg14449180,cg08231349,cg13056744,cg12998850,cg07657192,cg01519225,cg22671410	TSS200,TSS1500,TSS1500,TSS1500,TSS1500,TSS1500,TSS1500,TSS1500,TSS1500,TSS1500,TSS1500,TSS1500,TSS1500,TSS1500,_	N_Shore,N_Shore,N_Shore,Island,Island,Island,Island,Island,Island,Island,Island,Island,Island,Island,Island,Island,Island,Island,Island	HCG4P6,HCG4P6,HCG4P6,HCG4P6,HCG4P6,HCG4P6,HCG4P6,HCG4P6,HCG4P6,HCG4P6,HCG4P6,HCG4P6,HCG4P6,HCG4P6,_	NR_001317,NR_001317,NR_001317,NR_001317,NR_001317,NR_001317,NR_001317,NR_001317,NR_001317,NR_001317,NR_001317,NR_001317,NR_001317,NR_001317,_	hyper.chimp
6	30082062	30082931	3	cg23318893,cg08879910,cg18713646	Body;Body,Body;Body,Body;Body	N_Shore,Island,Island	HLA-J;NCRNA00171,HLA-J;NCRNA00171,HLA-J;NCRNA00171	NR_024240;NR_026751,NR_024240;NR_026751,NR_024240;NR_026751	hyper.chimp
6	30089383	30089448	2	cg12854611,cg04689016	Body,Body	_,_	NCRNA00171,NCRNA00171	NR_026751,NR_026751	hyper.chimp
6	30177192	30177660	3	cg22442895,cg03553308,cg04906656	_,_	N_Shore,N_Shore,N_Shore	_,_	_,_	hyper.chimp
6	30221753	30221804	4	cg10897223,cg08996678,cg13280080,cg04006457	Body,Body,Body,Body	_,_	TRIM40,TRIM40,TRIM40,TRIM40	NM_138700,NM_138700,NM_138700,NM_138700	hypo.chimp
6	30239505	30239549	2	cg03609216,cg02012483	1stExon,1stExon	_,_	TRIM15,TRIM15	NM_033229,NM_033229	hyper.chimp
6	30282683	30283306	4	cg03084824,cg07523043,cg20345556,cg14971718	5UTR,5UTR,5UTR,5UTR	_,_	TRIM26,TRIM26,TRIM26,TRIM26	NM_003449,NM_003449,NM_003449,NM_003449	hypo.chimp
6	30290328	30290497	3	cg16468822,cg10526841,cg08186900	TSS1500,TSS1500,TSS1500	S_Shore,S_Shore,S_Shore	TRIM26,TRIM26,TRIM26	NM_003449,NM_003449,NM_003449	hypo.chimp
6	30334980	30336410	8	cg14296767,cg23721712,cg10605681,cg08958598,cg14183206,cg26993102,cg17835678,cg16722947	TSS1500,Body,Body,Body,Body,Body,Body,Body	N_Shore,Island,Island,Island,Island,Island,Island,S_Shore	HLA-L,HLA-L,HLA-L,HLA-L,HLA-L,HLA-L,HLA-L,HLA-L	NR_027822,NR_027822,NR_027822,NR_027822,NR_027822,NR_027822,NR_027822,NR_027822	hypo.chimp
6	30335921	30336048	4	cg25643819,cg22053904,cg07723510,cg11456756	Body,Body,Body,Body	Island,Island,Island,Island	HLA-L,HLA-L,HLA-L,HLA-L	NR_027822,NR_027822,NR_027822,NR_027822	hyper.chimp
6	30398237	30398422	2	cg12186939,cg26193268	Body;Body,Body;Body	N_Shelf,N_Shelf	HCG18;HCG18,HCG18;HCG18	NR_024052;NR_024053,NR_024052;NR_024053	hyper.chimp
6	30403206	30403445	4	cg27323049,cg20220639,cg19913291,cg06685111	TSS1500;5UTR;5UTR;TSS1500;1stExon,TSS1500;5UTR;5UTR;TSS1500;1stExon,TSS1500;5UTR;5UTR;TSS1500;1stExon,TSS1500;5UTR;5UTR;TSS1500;1stExon	S_Shore,S_Shore,S_Shore,S_Shore	HCG18;TRIM39;TRIM39;HCG18;TRIM39,HCG18;TRIM39;TRIM39;HCG18;TRIM39,HCG18;TRIM39;TRIM39;HCG18;TRIM39,HCG18;TRIM39;TRIM39;HCG18;TRIM39	NR_024053;NM_172016;NM_021253;NR_024052;NM_172016,NR_024053;NM_172016;NM_021253;NR_024052;NM_172016,NR_024053;NM_172016;NM_021253;NR_024052;NM_172016,NR_024053;NM_172016;NM_021253;NR_024052;NM_172016	hypo.chimp
6	30420666	30420797	2	cg00258873,cg22334880	TSS1500,TSS200	N_Shore,N_Shore	RPP21,RPP21	NM_024839,NM_024839	hypo.chimp
6	30539253	30540179	11	cg25580405,cg17333837,cg07005242,cg17412654,cg13375628,cg13694461,cg23658834,cg18804722,cg03126547,cg02994187,cg25559262	_,_	N_Shore,Island,Island,Island,Island,Island,Island,Island,Island,Island,Island	_,_	_,_	hypo.chimp
6	30541402	30542088	4	cg16459276,cg07017214,cg24900923,cg11192541	_,_	N_Shore,N_Shore,Island,Island	_,_	_,_	hypo.chimp
6	30557060	30557526	3	cg15921779,cg15717225,cg05655390	_,_	_,_	_,_	_,_	hypo.chimp
6	30563786	30563943	3	cg16367518,cg08416870,cg10794086	TSS1500,TSS1500,TSS1500	N_Shore,N_Shore,N_Shore	HLA-E,HLA-E,HLA-E	NM_005516,NM_005516,NM_005516	hypo.chimp
6	30565365	30566140	6	cg09676939,cg20444604,cg18183435,cg09620840,cg21176130,cg09326440	Body,Body,Body,Body,Body,Body	Island,Island,Island,Island,Island,Island	HLA-E,HLA-E,HLA-E,HLA-E,HLA-E,HLA-E	NM_005516,NM_005516,NM_005516,NM_005516,NM_005516,NM_005516	hyper.chimp
6	30632318	30632588	2	cg08900874,cg24066072	TSS200;5UTR;TSS200;1stExon,5UTR;5UTR;1stExon;5UTR;1stExon;1stExon	Island,Island	PRR3;GNL1;PRR3;GNL1,PRR3;PRR3;PRR3;GNL1;PRR3;GNL1	NM_001077497;NM_005275;NM_025263;NM_005275,NM_025263;NM_001077497;NM_025263;NM_005275;NM_001077497;NM_005275	hyper.chimp
6	30646568	30646599	2	cg17365962,cg24946044	TSS1500;TSS1500,TSS1500;TSS1500	N_Shore,N_Shore	ABCF1;ABCF1,ABCF1;ABCF1	NM_001090;NM_001025091,NM_001090;NM_001025091	hyper.chimp
6	30722147	30722401	7	cg14352682,cg16583303,cg06182584,cg13011452,cg13253439,cg21291449,cg19666256	TSS1500;TSS1500;TSS1500,TSS1500;TSS1500;TSS1500,TSS1500;TSS1500;TSS1500,TSS1500;TSS1500;TSS1500,TSS1500;TSS1500;TSS1500,TSS1500;TSS1500;TSS1500,TSS1500;TSS1500;TSS1500	N_Shore,N_Shore,N_Shore,N_Shore,N_Shore,N_Shore,N_Shore	C6orf136;C6orf136;C6orf136,C6orf136;C6orf136;C6orf136,C6orf136;C6orf136;C6orf136,C6orf136;C6orf136;C6orf136,C6orf136;C6orf136;C6orf136,C6orf136;C6orf136;C6orf136,C6orf136;C6orf136;C6orf136	NM_001161376;NM_145029;NM_001109938,NM_001161376;NM_145029;NM_001109938,NM_001161376;NM_145029;NM_001109938,NM_001161376;NM_145029;NM_001109938,NM_001161376;NM_145029;NM_001109938,NM_001161376;NM_145029;NM_001109938,NM_001161376;NM_145029;NM_001109938	hypo.chimp
6	30748188	30749199	3	cg05948527,cg13411122,cg20117675	Body;Body,Body;Body,TSS1500;TSS1500	N_Shore,N_Shore,S_Shore	DHX16;DHX16,DHX16;DHX16,DHX16;DHX16	NM_001164239;NM_003587,NM_001164239;NM_003587,NM_001164239;NM_003587	hypo.chimp
6	30754825	30755628	6	cg00663832,cg13054640,cg07076751,cg08420066,cg10426318,cg10145196	Body;Body,Body;Body,Body;Body,Body;Body,Body;Body,Body;Body	_,_	KIAA1949;KIAA1949,KIAA1949;KIAA1949,KIAA1949;KIAA1949,KIAA1949;KIAA1949,KIAA1949;KIAA1949,KIAA1949;KIAA1949	NM_001134870;NM_133471,NM_001134870;NM_133471,NM_001134870;NM_133471,NM_001134870;NM_133471,NM_001134870;NM_133471,NM_001134870;NM_133471	hypo.chimp
6	30759542	30761715	21	cg17476701,cg00587922,cg13036352,cg25659902,cg20690667,cg24967096,cg00221185,cg05098566,cg15768443,cg08887400,cg03953626,cg18586886,cg18427856,cg01413582,cg08253704,cg12105190,cg25980484,cg03052182,cg18335326,cg10098021,cg12197421	Body;Body,Body;Body,Body;Body,Body;1stExon,Body;1stExon,Body;1stExon,Body;1stExon,Body;1stExon,Body;1stExon,Body;1stExon,Body;1stExon,Body;1stExon,Body;1stExon,Body;1stExon,Body;1stExon,Body;1stExon,Body;1stExon,Body;1stExon,Body;1stExon,Body;1stExon,Body;1stExon	N_Shelf,N_Shelf,N_Shelf,N_Shelf,N_Shelf,N_Shelf,N_Shelf,N_Shelf,N_Shelf,N_Shelf,N_Shore,N_Shore,N_Shore,N_Shore,N_Shore,N_Shore,N_Shore,N_Shore,N_Shore,N_Shore,N_Shore	KIAA1949;KIAA1949,KIAA1949;KIAA1949,KIAA1949;KIAA1949,KIAA1949;KIAA1949,KIAA1949;KIAA1949,KIAA1949;KIAA1949,KIAA1949;KIAA1949,KIAA1949;KIAA1949,KIAA1949;KIAA1949,KIAA1949;KIAA1949,KIAA1949;KIAA1949,KIAA1949;KIAA1949,KIAA1949;KIAA1949,KIAA1949;KIAA1949,KIAA1949;KIAA1949,KIAA1949;KIAA1949,KIAA1949;KIAA1949,KIAA1949;KIAA1949,KIAA1949;KIAA1949,KIAA1949;KIAA1949,KIAA1949;KIAA1949	NM_001134870;NM_133471,NM_001134870;NM_133471,NM_001134870;NM_133471,NM_001134870;NM_133471,NM_001134870;NM_133471,NM_001134870;NM_133471,NM_001134870;NM_133471,NM_001134870;NM_133471,NM_001134870;NM_133471,NM_001134870;NM_133471,NM_001134870;NM_133471,NM_001134870;NM_133471,NM_001134870;NM_133471,NM_001134870;NM_133471,NM_001134870;NM_133471,NM_001134870;NM_133471,NM_001134870;NM_133471,NM_001134870;NM_133471,NM_001134870;NM_133471,NM_001134870;NM_133471,NM_001134870;NM_133471	hypo.chimp
6	30765963	30766282	3	cg07448742,cg09703123,cg27214030	Body,Body,Body	S_Shelf,S_Shelf,S_Shelf	NRM,NRM,NRM	NM_007243,NM_007243,NM_007243	hypo.chimp
6	30793614	30793723	3	cg07229198,cg18512512,cg16580700	TSS200,TSS1500,TSS1500	S_Shore,S_Shore,S_Shore	MDC1,MDC1,MDC1	NM_014641,NM_014641,NM_014641	hyper.chimp
6	30796274	30796310	2	cg14861518,cg15482861	1stExon,1stExon	N_Shore,N_Shore	TUBB,TUBB	NM_178014,NM_178014	hypo.chimp
6	30797823	30799963	12	cg26366109,cg25742745,cg06005318,cg27129922,cg22001807,cg24146125,cg07972954,cg11071615,cg19748937,cg17387619,cg07622533,cg07296268	Body,Body,Body,Body,Body,Body,Body,Body,Body,Body,Body,Body	S_Shore,S_Shore,S_Shore,S_Shore,S_Shore,S_Shore,S_Shore,S_Shore,S_Shore,S_Shore,S_Shore,S_Shelf	TUBB,TUBB,TUBB,TUBB,TUBB,TUBB,TUBB,TUBB,TUBB,TUBB,TUBB,TUBB	NM_178014,NM_178014,NM_178014,NM_178014,NM_178014,NM_178014,NM_178014,NM_178014,NM_178014,NM_178014,NM_178014,NM_178014	hypo.chimp
6	30960993	30961587	4	cg13695585,cg22485298,cg25607383,cg11975790	5UTR;5UTR,5UTR;5UTR,5UTR;5UTR,5UTR;5UTR	S_Shore,S_Shore,S_Shore,S_Shore	DDR1;DDR1,DDR1;DDR1,DDR1;DDR1,DDR1;DDR1	NM_013993;NM_001954,NM_013993;NM_001954,NM_013993;NM_001954,NM_013993;NM_001954	hypo.chimp
6	30989787	30990363	5	cg11571001,cg26467571,cg27525647,cg24268004,cg02601318	3UTR;TSS1500;TSS200;TSS200,5UTR;5UTR;Body,5UTR;5UTR;Body,5UTR;5UTR;Body,5UTR;5UTR;Body	Island,S_Shore,S_Shore,S_Shore,S_Shore	GTF2H4;VARS2;VARS2;VARS2,VARS2;VARS2;VARS2,VARS2;VARS2;VARS2,VARS2;VARS2;VARS2,VARS2;VARS2;VARS2	NM_001517;NM_001167734;NM_020442;NM_001167733,NM_001167733;NM_020442;NM_001167734,NM_001167733;NM_020442;NM_001167734,NM_001167733;NM_020442;NM_001167734,NM_001167733;NM_020442;NM_001167734
6	31215300	31215642	2	cg13617087,cg21084702	Body;TSS200,Body;TSS1500	_,_	PSORS1C1;PSORS1C2,PSORS1C1;PSORS1C2	NM_014068;NM_014069,NM_014068;NM_014069
6	31432231	31432259	3	cg14998329,cg09671906,cg13902357	Body,Body,Body	Island,Island,Island	HLA-B,HLA-B,HLA-B	NM_005514,NM_005514,NM_005514
6	31583866	31584258	2	cg07747875,cg11336938	Body,Body	_,_	MICB,MICB	NM_005931,NM_005931
6	31848766	31848957	6	cg05565809,cg10671946,cg10740660,cg22112841,cg27652925,cg13214149	Body,Body,Body,Body,Body,Body	_,_	C6orf27,C6orf27,C6orf27,C6orf27,C6orf27,C6orf27	NM_025258,NM_025258,NM_025258,NM_025258,NM_025258,NM_025258
6	31852524	31852941	7	cg23916646,cg12383352,cg27143082,cg27574980,cg02177648,cg00728602,cg10652641	Body,5UTR,5UTR,5UTR,1stExon;5UTR,1stExon;5UTR,1stExon;5UTR	_,_	C6orf27,C6orf27,C6orf27,C6orf27,C6orf27;C6orf27,C6orf27;C6orf27,C6orf27;C6orf27	NM_025258,NM_025258,NM_025258,NM_025258,NM_025258;NM_025258,NM_025258;NM_025258,NM_025258;NM_025258
6	31905800	31906710	4	cg12796221,cg15043711,cg19860840,cg09782889	3UTR;1stExon,3UTR;1stExon,_	S_Shore,S_Shore,S_Shore,S_Shore	HSPA1B;HSPA1B,HSPA1B;HSPA1B,_	NM_005346;NM_005346,NM_005346;NM_005346,_
6	32837565	32837568	2	cg00755130,cg27160348	Body,Body	Island,Island	HLA-DQB2,HLA-DQB2	NR_003937,NR_003937
6	32873000	32873330	5	cg22050330,cg20067471,cg07056079,cg01423251,cg23090653	_,_	_,_	_,_	_,_
6	32913376	32913855	5	cg12854186,cg13563634,cg23560159,cg10088320,cg11668794	Body;Body,Body;Body,Body;Body,Body;Body,Body;Body	N_Shore,N_Shore,N_Shore,N_Shore,N_Shore	TAP2;TAP2,TAP2;TAP2,TAP2;TAP2,TAP2;TAP2,TAP2;TAP2	NM_000544;NM_018833,NM_000544;NM_018833,NM_000544;NM_018833,NM_000544;NM_018833,NM_000544;NM_018833
6	32928388	32928977	8	cg04773990,cg24154161,cg23880953,cg26700949,cg18436324,cg05412930,cg13403689,cg14925994	Body,Body,TSS1500;TSS1500;Body,TSS1500;TSS1500;Body,TSS1500;TSS1500;Body,TSS1500;TSS1500;Body,TSS1500;TSS1500;Body,TSS1500;TSS1500;1stExon	N_Shore,N_Shore,N_Shore,N_Shore,N_Shore,N_Shore,N_Shore,Island	TAP1,TAP1,PSMB9;PSMB9;TAP1,PSMB9;PSMB9;TAP1,PSMB9;PSMB9;TAP1,PSMB9;PSMB9;TAP1,PSMB9;PSMB9;TAP1,PSMB9;PSMB9;TAP1	NM_000593,NM_000593,NM_002800;NM_148954;NM_000593,NM_002800;NM_148954;NM_000593,NM_002800;NM_148954;NM_000593,NM_002800;NM_148954;NM_000593,NM_002800;NM_148954;NM_000593,NM_002800;NM_148954;NM_000593
6	33028762	33028940	2	cg03520342,cg07151443	1stExon,TSS200	_,_	HLA-DMA,HLA-DMA	NM_006120,NM_006120
6	33085195	33086249	4	cg10397527,cg26168907,cg16914277,cg05408403	Body,Body,TSS1500,TSS1500	S_Shore,S_Shore,S_Shelf,S_Shelf	HLA-DOA,HLA-DOA,HLA-DOA,HLA-DOA	NM_002119,NM_002119,NM_002119,NM_002119
6	33151827	33151954	2	cg22483030,cg12365667	1stExon,Body	_,_	HLA-DPB1,HLA-DPB1	NM_002121,NM_002121
6	33156570	33156857	3	cg14801692,cg02197634,cg25491704	Body,Body,Body	Island,S_Shore,S_Shore	HLA-DPB1,HLA-DPB1,HLA-DPB1	NM_002121,NM_002121,NM_002121
6	33323627	33323816	4	cg12182937,cg12659606,cg10437217,cg16231241	_,_	N_Shore,N_Shore,N_Shore,N_Shore	_,_	_,_
6	33466763	33466979	3	cg26908388,cg25474873,cg15924693	TSS1500,TSS1500,TSS1500	N_Shore,N_Shore,N_Shore	KIFC1,KIFC1,KIFC1	NM_002263,NM_002263,NM_002263
6	34077939	34078144	3	cg26361999,cg17418212,cg01996297	_,_	_,_	_,_	_,_
6	34272051	34272503	5	cg14723664,cg10633931,cg00025877,cg15620384,cg11064935	_,_	N_Shore,Island,Island,Island,Island	_,_	_,_
6	34607367	34607482	3	cg10486974,cg26063721,cg12412902	Body,Body,Body	Island,Island,Island	PACSIN1,PACSIN1,PACSIN1	NM_020804,NM_020804,NM_020804
6	35216899	35217361	3	cg21646955,cg14562060,cg01108476	Body;5UTR,TSS200;TSS200,TSS200;TSS200	Island,Island,Island	TCP11;TCP11,TCP11;TCP11,TCP11;TCP11	NM_001093728;NM_018679,NM_001093728;NM_018679,NM_001093728;NM_018679	hyper.chimp
6	31030960	31031844	2	cg08827454,cg15878568	_,_	N_Shore,S_Shore	_,_	_,_	hypo.chimp
6	31235336	31235506	3	cg09329266,cg21799473,cg23654219	Body;Body;TSS1500,Body;Body;TSS1500,Body;Body	S_Shore,S_Shore,S_Shore	TCF19;TCF19;CCHCR1,TCF19;TCF19;CCHCR1,TCF19;TCF19	NM_001077511;NM_007109;NM_019052,NM_001077511;NM_007109;NM_019052,NM_001077511;NM_007109	hypo.chimp
6	31274076	31274153	2	cg08896715,cg17557540	Body,Body	S_Shore,S_Shore	HCG27,HCG27	NR_026791,NR_026791	hypo.chimp
6	31383530	31384776	9	cg03555881,cg25107000,cg27071793,cg03709428,cg27258561,cg12076350,cg02446475,cg22993154,cg03634778	_,_	N_Shore,N_Shore,N_Shore,N_Shore,N_Shore,N_Shore,N_Shore,S_Shore,S_Shore	_,_	_,_	hypo.chimp
6	31616276	31616297	2	cg11489251,cg24631162	Body;Body,5UTR;5UTR	N_Shore,N_Shore	BAT1;BAT1,BAT1;BAT1	NM_080598;NM_004640,NM_004640;NM_080598	hypo.chimp
6	31723916	31723918	2	cg05554735,cg21784030	Body;Body;Body;Body,Body;Body;Body;Body	N_Shelf,N_Shelf	BAT3;BAT3;BAT3;BAT3,BAT3;BAT3;BAT3;BAT3	NM_004639;NM_080702;NM_080703;NM_001098534,NM_004639;NM_080702;NM_080703;NM_001098534	hypo.chimp
6	31777881	31777984	2	cg14986464,cg08784091	Body,Body	N_Shore,N_Shore	BAT5,BAT5	NM_021160,NM_021160	hypo.chimp
6	31806471	31806701	6	cg03980764,cg18402034,cg03329603,cg14647877,cg12216180,cg04387059	3UTR;TSS1500,Body;TSS1500,Body;TSS1500,Body;TSS1500,Body;TSS1500,Body;TSS1500	S_Shore,S_Shore,S_Shore,S_Shore,S_Shore,S_Shore	CLIC1;DDAH2,CLIC1;DDAH2,CLIC1;DDAH2,CLIC1;DDAH2,CLIC1;DDAH2,CLIC1;DDAH2	NM_001288;NM_013974,NM_001288;NM_013974,NM_001288;NM_013974,NM_001288;NM_013974,NM_001288;NM_013974,NM_001288;NM_013974
6	31813942	31813967	2	cg04789495,cg10563645	_,_	N_Shore,N_Shore	_,_	_,_
6	31815130	31816278	10	cg07801569,cg24536200,cg02737149,cg15984741,cg00071998,cg08888439,cg00868252,cg24500422,cg14658948,cg24932925	TSS1500;TSS1500;TSS1500;TSS1500,5UTR;1stExon;5UTR;5UTR;5UTR,5UTR;5UTR;5UTR;5UTR,5UTR;5UTR;5UTR;5UTR,5UTR;5UTR;5UTR;5UTR,5UTR;5UTR;5UTR;5UTR,Body;Body;Body;Body,Body;Body;Body;Body,Body;Body;Body;Body,Body;Body;Body;Body	N_Shore,Island,Island,Island,Island,Island,Island,Island,Island,Island	MSH5;MSH5;MSH5;MSH5,MSH5;MSH5;MSH5;MSH5;MSH5,MSH5;MSH5;MSH5;MSH5,MSH5;MSH5;MSH5;MSH5,MSH5;MSH5;MSH5;MSH5,MSH5;MSH5;MSH5;MSH5,MSH5;MSH5;MSH5;MSH5,MSH5;MSH5;MSH5;MSH5,MSH5;MSH5;MSH5;MSH5,MSH5;MSH5;MSH5;MSH5	NM_025259;NM_002441;NM_172165;NM_172166,NM_002441;NM_002441;NM_025259;NM_172165;NM_172166,NM_002441;NM_025259;NM_172165;NM_172166,NM_002441;NM_025259;NM_172165;NM_172166,NM_002441;NM_025259;NM_172165;NM_172166,NM_002441;NM_025259;NM_172165;NM_172166,NM_172165;NM_025259;NM_002441;NM_172166,NM_172165;NM_025259;NM_002441;NM_172166,NM_172165;NM_025259;NM_002441;NM_172166,NM_172165;NM_025259;NM_002441;NM_172166
6	31841667	31842380	13	cg16587961,cg09630142,cg02002586,cg03560996,cg12425321,cg10158997,cg05239811,cg13187827,cg19593741,cg25264948,cg10095777,cg23287992,cg00848392	Body,Body,Body,Body,Body,Body,Body,Body,Body,Body,Body,Body,Body	_,_	C6orf27,C6orf27,C6orf27,C6orf27,C6orf27,C6orf27,C6orf27,C6orf27,C6orf27,C6orf27,C6orf27,C6orf27,C6orf27	NM_025258,NM_025258,NM_025258,NM_025258,NM_025258,NM_025258,NM_025258,NM_025258,NM_025258,NM_025258,NM_025258,NM_025258,NM_025258
6	31912718	31912862	2	cg07089321,cg01657995	5UTR;5UTR;TSS200,5UTR;5UTR;Body	S_Shore,S_Shelf	C6orf48;C6orf48;SNORD52,C6orf48;C6orf48;SNORD52	NM_001040437;NM_001040438;NR_002742,NM_001040437;NM_001040438;NR_002742
6	31937819	31938014	8	cg27645345,cg02776448,cg13716619,cg09932747,cg13195955,cg00547425,cg23861803,cg13033814	Body,Body,Body,Body,Body,Body,Body,Body	N_Shore,N_Shore,N_Shore,N_Shore,N_Shore,N_Shore,N_Shore,N_Shore	NEU1,NEU1,NEU1,NEU1,NEU1,NEU1,NEU1,NEU1	NM_000434,NM_000434,NM_000434,NM_000434,NM_000434,NM_000434,NM_000434,NM_000434
6	31940829	31941141	2	cg20961940,cg05686323	Body,Body	S_Shore,S_Shelf	SLC44A4,SLC44A4	NM_025257,NM_025257
6	31974565	31974804	2	cg02760218,cg19577206	TSS1500;TSS1500,TSS1500;TSS1500	N_Shore,N_Shore	EHMT2;EHMT2,EHMT2;EHMT2	NM_006709;NM_025256,NM_006709;NM_025256
6	31978579	31978870	3	cg06540876,cg11953311,cg24051943	TSS1500,TSS1500,TSS1500	S_Shore,S_Shore,S_Shore	ZBTB12,ZBTB12,ZBTB12	NM_181842,NM_181842,NM_181842
6	32046840	32047563	13	cg26837372,cg24870273,cg12776033,cg26029547,cg16190718,cg23906067,cg04142955,cg10914467,cg20194050,cg04149916,cg13069441,cg01067809,cg05258214	TSS200;TSS1500;TSS1500;Body,TSS200;TSS1500;TSS1500;Body,TSS1500;TSS1500;Body;Body,TSS1500;TSS1500;Body;Body,TSS1500;TSS1500;Body;Body,TSS1500;TSS1500;Body;Body,TSS1500;TSS1500;Body;Body,TSS1500;TSS1500;Body;Body,TSS1500;TSS1500;Body;Body,TSS1500;TSS1500;Body;Body,TSS1500;TSS1500;Body;Body,5UTR;TSS200;Body;TSS200,5UTR;TSS200;Body;TSS200	N_Shore,N_Shore,N_Shore,N_Shore,N_Shore,N_Shore,N_Shore,N_Shore,N_Shore,N_Shore,N_Shore,N_Shore,N_Shore	STK19;STK19;STK19;DOM3Z,STK19;STK19;STK19;DOM3Z,STK19;STK19;DOM3Z;STK19,STK19;STK19;DOM3Z;STK19,STK19;STK19;DOM3Z;STK19,STK19;STK19;DOM3Z;STK19,STK19;STK19;DOM3Z;STK19,STK19;STK19;DOM3Z;STK19,STK19;STK19;DOM3Z;STK19,STK19;STK19;DOM3Z;STK19,STK19;STK19;DOM3Z;STK19,DOM3Z;STK19;STK19;STK19,DOM3Z;STK19;STK19;STK19	NR_026717;NM_032454;NM_004197;NM_005510,NR_026717;NM_032454;NM_004197;NM_005510,NM_032454;NM_004197;NM_005510;NR_026717,NM_032454;NM_004197;NM_005510;NR_026717,NM_032454;NM_004197;NM_005510;NR_026717,NM_032454;NM_004197;NM_005510;NR_026717,NM_032454;NM_004197;NM_005510;NR_026717,NM_032454;NM_004197;NM_005510;NR_026717,NM_032454;NM_004197;NM_005510;NR_026717,NM_032454;NM_004197;NM_005510;NR_026717,NM_032454;NM_004197;NM_005510;NR_026717,NM_005510;NM_004197;NR_026717;NM_032454,NM_005510;NM_004197;NR_026717;NM_032454
6	32048834	32049028	2	cg07271361,cg20069688	Body;Body;TSS1500;Body,Body;Body;TSS1500;Body	S_Shore,S_Shore	STK19;STK19;DOM3Z;STK19,STK19;STK19;DOM3Z;STK19	NM_004197;NM_032454;NM_005510;NR_026717,NM_004197;NM_032454;NM_005510;NR_026717
6	32121823	32122717	4	cg20621471,cg09423875,cg08972588,cg25375757	1stExon;5UTR;Body,Body;TSS1500,Body;TSS1500,Body;TSS1500	_,_	TNXB;TNXB;TNXB,TNXB;TNXB,TNXB;TNXB,TNXB;TNXB	NM_032470;NM_032470;NM_019105,NM_019105;NM_032470,NM_019105;NM_032470,NM_019105;NM_032470	hypo.chimp
6	32139798	32140687	2	cg02270895,cg13154622	Body,Body	_,_	TNXB,TNXB	NM_019105,NM_019105	hypo.chimp
6	32162876	32164097	6	cg14161269,cg20471413,cg24055029,cg10812186,cg07315356,cg23186098	Body,Body,Body,Body,Body,Body	N_Shore,Island,Island,Island,S_Shore,S_Shore	TNXB,TNXB,TNXB,TNXB,TNXB,TNXB	NM_019105,NM_019105,NM_019105,NM_019105,NM_019105,NM_019105	hypo.chimp
6	32184248	32184315	2	cg09872737,cg19108771	5UTR,5UTR	_,_	TNXB,TNXB	NM_019105,NM_019105	hypo.chimp
6	32194796	32194880	4	cg10089357,cg07986385,cg17396404,cg12735838	Body;Body,Body;Body,Body;Body,Body;Body	_,_	ATF6B;ATF6B,ATF6B;ATF6B,ATF6B;ATF6B,ATF6B;ATF6B	NM_004381;NM_001136153,NM_004381;NM_001136153,NM_004381;NM_001136153,NM_004381;NM_001136153	hypo.chimp
6	32202823	32203254	9	cg08386009,cg09845996,cg25392500,cg04628692,cg24990564,cg08732684,cg10007927,cg23663129,cg22986222	Body;Body,Body;Body,Body;Body,Body;Body,Body;Body,Body;Body,Body;Body,Body;Body,Body;Body	N_Shelf,N_Shelf,N_Shelf,N_Shelf,N_Shelf,N_Shelf,N_Shelf,N_Shelf,N_Shelf	ATF6B;ATF6B,ATF6B;ATF6B,ATF6B;ATF6B,ATF6B;ATF6B,ATF6B;ATF6B,ATF6B;ATF6B,ATF6B;ATF6B,ATF6B;ATF6B,ATF6B;ATF6B	NM_004381;NM_001136153,NM_004381;NM_001136153,NM_004381;NM_001136153,NM_004381;NM_001136153,NM_004381;NM_001136153,NM_004381;NM_001136153,NM_004381;NM_001136153,NM_004381;NM_001136153,NM_004381;NM_001136153	hypo.chimp
6	32230714	32230933	6	cg21241317,cg04877280,cg06832687,cg27070869,cg00086577,cg04856022	Body;Body,Body;Body,Body;Body,Body;Body,Body;Body,Body;Body	S_Shore,S_Shore,S_Shore,S_Shore,S_Shore,S_Shore	PPT2;PPT2,PPT2;PPT2,PPT2;PPT2,PPT2;PPT2,PPT2;PPT2,PPT2;PPT2	NM_005155;NM_138717,NM_005155;NM_138717,NM_005155;NM_138717,NM_005155;NM_138717,NM_005155;NM_138717,NM_005155;NM_138717	hypo.chimp
6	32241528	32241907	2	cg03353474,cg18699916	5UTR,5UTR	N_Shore,N_Shore	EGFL8,EGFL8	NM_030652,NM_030652	hypo.chimp
6	32261518	32261635	2	cg23463700,cg14538532	3UTR,3UTR	_,_	PBX2,PBX2	NM_002586,NM_002586	hypo.chimp
6	32264049	32265568	11	cg16602460,cg05525649,cg08293075,cg02681370,cg25978487,cg11103845,cg13964363,cg13910855,cg19700006,cg17023707,cg23144563	Body,Body,Body,Body,Body,Body,Body,1stExon,1stExon,1stExon,1stExon	_,_	PBX2,PBX2,PBX2,PBX2,PBX2,PBX2,PBX2,PBX2,PBX2,PBX2,PBX2	NM_002586,NM_002586,NM_002586,NM_002586,NM_002586,NM_002586,NM_002586,NM_002586,NM_002586,NM_002586,NM_002586	hypo.chimp
6	32413084	32414018	3	cg14704780,cg11478766,cg26263563	Body,Body,Body	_,_	C6orf10,C6orf10,C6orf10	NM_006781,NM_006781,NM_006781	hypo.chimp
6	32914677	32914899	2	cg25728415,cg08557029	TSS200;TSS200,TSS1500;TSS1500	S_Shore,S_Shore	TAP2;TAP2,TAP2;TAP2	NM_018833;NM_000544,NM_018833;NM_000544	hypo.chimp
6	33050336	33050786	6	cg16416715,cg26264318,cg25158622,cg26953232,cg24275356,cg17451586	Body;Body,Body;Body,Body;Body,Body;Body,Body;Body,Body;Body	S_Shore,S_Shore,S_Shore,S_Shore,S_Shore,S_Shore	BRD2;BRD2,BRD2;BRD2,BRD2;BRD2,BRD2;BRD2,BRD2;BRD2,BRD2;BRD2	NM_001113182;NM_005104,NM_001113182;NM_005104,NM_001113182;NM_005104,NM_001113182;NM_005104,NM_001113182;NM_005104,NM_001113182;NM_005104	hypo.chimp
6	33161769	33161979	2	cg13921245,cg24583871	Body,Body	_,_	HLA-DPB1,HLA-DPB1	NM_002121,NM_002121	hypo.chimp
6	33196798	33197375	2	cg27494597,cg23917817	Body,Body	S_Shelf,_	HLA-DPB2,HLA-DPB2	NR_001435,NR_001435	hypo.chimp
6	33286920	33287027	3	cg18886197,cg24341537,cg14534739	Body,Body,Body	N_Shelf,N_Shelf,N_Shore	RING1,RING1,RING1	NM_002931,NM_002931,NM_002931	hypo.chimp
6	33324442	33324626	3	cg10151338,cg12495503,cg14599755	_,_	Island,Island,Island	_,_	_,_	hypo.chimp
6	33334626	33334993	2	cg02835481,cg17853071	Body,Body	_,_	VPS52,VPS52	NM_022553,NM_022553	hypo.chimp
6	33351961	33352150	2	cg21986677,cg03702686	TSS1500;Body,TSS1500;Body	N_Shore,N_Shore	B3GALT4;RPS18,B3GALT4;RPS18	NM_003782;NM_022551,NM_003782;NM_022551	hypo.chimp
6	33365947	33366559	7	cg06494670,cg20478120,cg17827614,cg27055685,cg05240178,cg04639931,cg02845534	Body;TSS1500;TSS1500,Body;TSS1500;TSS1500,Body;TSS1500;TSS1500,Body;TSS1500;TSS1500,Body;TSS1500;TSS1500,Body;TSS1500;TSS1500,Body;TSS1500;TSS1500	S_Shore,S_Shore,S_Shore,S_Shore,S_Shore,S_Shore,S_Shore	PFDN6;WDR46;WDR46,PFDN6;WDR46;WDR46,PFDN6;WDR46;WDR46,PFDN6;WDR46;WDR46,PFDN6;WDR46;WDR46,PFDN6;WDR46;WDR46,PFDN6;WDR46;WDR46	NM_014260;NM_001164267;NM_005452,NM_014260;NM_001164267;NM_005452,NM_014260;NM_001164267;NM_005452,NM_014260;NM_001164267;NM_005452,NM_014260;NM_001164267;NM_005452,NM_014260;NM_001164267;NM_005452,NM_014260;NM_001164267;NM_005452	hypo.chimp
6	33392520	33392624	2	cg26922697,cg08421271	Body;Body,Body;Body	N_Shore,N_Shore	ZBTB22;ZBTB22,ZBTB22;ZBTB22	NM_005453;NM_001145338,NM_005453;NM_001145338	hypo.chimp
6	33397638	33397697	3	cg18113453,cg00187059,cg10285420	Body;Body;Body;Body,Body;Body;Body;Body,5UTR;Body;Body;5UTR	N_Shore,N_Shore,N_Shore	DAXX;DAXX;DAXX;DAXX,DAXX;DAXX;DAXX;DAXX,DAXX;DAXX;DAXX;DAXX	NM_001141969;NR_024517;NM_001350;NM_001141970,NM_001141969;NR_024517;NM_001350;NM_001141970,NM_001141969;NR_024517;NM_001141970;NM_001350	hypo.chimp
6	33468473	33468525	2	cg13199639,cg11223101	Body,Body	S_Shore,S_Shore	KIFC1,KIFC1	NM_002263,NM_002263	hypo.chimp
6	33492468	33493061	4	cg01300096,cg14021478,cg23565821,cg25785639	Body;Body;Body;Body;Body,Body;Body;Body;Body;Body,Body;Body;Body;Body;Body,Body;Body;Body;Body;Body	N_Shore,N_Shore,N_Shore,N_Shore	CUTA;CUTA;CUTA;CUTA;CUTA,CUTA;CUTA;CUTA;CUTA;CUTA,CUTA;CUTA;CUTA;CUTA;CUTA,CUTA;CUTA;CUTA;CUTA;CUTA	NM_001014433;NM_001014840;NM_015921;NM_001014838;NM_001014837,NM_001014433;NM_001014840;NM_015921;NM_001014838;NM_001014837,NM_001014433;NM_001014840;NM_015921;NM_001014838;NM_001014837,NM_001014433;NM_001014840;NM_015921;NM_001014838;NM_001014837	hypo.chimp
6	33502424	33504225	9	cg06472065,cg15587013,cg27449651,cg23157971,cg15264710,cg17235827,cg24852032,cg00478874,cg11901544	Body,Body,Body,Body,Body,Body,Body,Body,Body	N_Shore,N_Shore,N_Shore,Island,Island,Island,Island,Island,Island	SYNGAP1,SYNGAP1,SYNGAP1,SYNGAP1,SYNGAP1,SYNGAP1,SYNGAP1,SYNGAP1,SYNGAP1	NM_006772,NM_006772,NM_006772,NM_006772,NM_006772,NM_006772,NM_006772,NM_006772,NM_006772	hypo.chimp
6	33530846	33530973	4	cg00408278,cg20104774,cg22297966,cg17931024	5UTR,Body,Body,Body	S_Shore,S_Shore,S_Shore,S_Shore	ZBTB9,ZBTB9,ZBTB9,ZBTB9	NM_152735,NM_152735,NM_152735,NM_152735
6	33746784	33746900	2	cg06328100,cg16204066	Body,Body	_,_	ITPR3,ITPR3	NM_002224,NM_002224
6	34132340	34132457	3	cg10270430,cg21797718,cg00070899	Body,Body,Body	Island,Island,S_Shore	GRM4,GRM4,GRM4	NM_000841,NM_000841,NM_000841
6	34221921	34222362	2	cg12284521,cg16392860	_,_	Island,S_Shore	_,_	_,_
6	35543671	35543830	2	cg06209740,cg00664084	TSS1500,TSS1500	N_Shore,Island	RPL10A,RPL10A	NM_007104,NM_007104
6	35587328	35588757	7	cg00247631,cg12827262,cg27532732,cg02569698,cg25830052,cg03368787,cg01109227	Body,Body,Body,Body,Body,1stExon,TSS200	N_Shore,Island,Island,Island,S_Shore,S_Shore,S_Shore	TULP1,TULP1,TULP1,TULP1,TULP1,TULP1,TULP1	NM_003322,NM_003322,NM_003322,NM_003322,NM_003322,NM_003322,NM_003322
6	37700849	37700953	2	cg15347434,cg23643980	_,_	_,_	_,_	_,_
6	37884571	37884575	2	cg04581073,cg02192731	_,_	_,_	_,_	_,_
6	42339138	42339180	2	cg17399647,cg17291767	Body,Body	S_Shelf,S_Shelf	TRERF1,TRERF1	NM_033502,NM_033502
6	42896541	42897031	2	cg14378057,cg15679095	TSS1500,5UTR	_,_	KIAA0240,KIAA0240	NM_015349,NM_015349	hypo.chimp
6	36207101	36207173	2	cg17087669,cg25458520	Body,Body	S_Shore,S_Shore	MAPK13,MAPK13	NM_002754,NM_002754	hyper.chimp
6	36517345	36517473	2	cg18748525,cg06422757	5UTR;TSS1500,5UTR;TSS1500	N_Shore,N_Shore	PXT1;KCTD20,PXT1;KCTD20	NM_152990;NM_173562,NM_152990;NM_173562	hyper.chimp
6	40830375	40831016	4	cg17017189,cg12745203,cg24003832,cg23609027	_,_	_,_	_,_	_,_	hyper.chimp
6	41811591	41812186	4	cg06378976,cg23594693,cg09490007,cg02822838	5UTR;TSS1500,5UTR;TSS1500;1stExon,TSS200;TSS1500,TSS1500;TSS1500	S_Shore,S_Shore,S_Shore,S_Shore	TFEB;TFEB,TFEB;TFEB;TFEB,TFEB;TFEB,TFEB;TFEB	NM_001167827;NM_007162,NM_001167827;NM_007162;NM_001167827,NM_001167827;NM_007162,NM_001167827;NM_007162	hyper.chimp
6	42253517	42254121	2	cg06049111,cg19489494	Body,Body	N_Shore,S_Shore	GUCA1A,GUCA1A	NM_000409,NM_000409	hyper.chimp
6	42846999	42847617	3	cg07481320,cg24520538,cg05945608	_,_	_,_	_,_	_,_	hyper.chimp
6	43035261	43035937	2	cg26549425,cg24815792	TSS1500,TSS1500	N_Shore,N_Shore	GNMT,GNMT	NM_018960,NM_018960	hypo.chimp
6	43055230	43055295	2	cg03943357,cg02359409	TSS1500,TSS1500	S_Shore,S_Shore	PEX6,PEX6	NM_000287,NM_000287	hyper.chimp
6	43096900	43097074	2	cg11000707,cg09478591	3UTR;TSS1500,TSS1500	N_Shore,N_Shore	KLHDC3;C6orf153,C6orf153	NM_057161;NM_033112,NM_033112
6	43351923	43352282	2	cg06892548,cg06241901	Body,Body	Island,Island	TTBK1,TTBK1	NM_032538,NM_032538
6	43531735	43532169	3	cg08724369,cg00482398,cg24236938	5UTR;1stExon;TSS1500,TSS1500;TSS1500,TSS1500;TSS1500	S_Shore,S_Shore,S_Shore	DLK2;DLK2;DLK2,DLK2;DLK2,DLK2;DLK2	NM_206539;NM_206539;NM_023932,NM_206539;NM_023932,NM_206539;NM_023932	hypo.chimp
6	44297962	44298707	2	cg00920254,cg04971779	5UTR;TSS1500;TSS1500;5UTR;TSS1500,5UTR;TSS1500;TSS1500;5UTR;TSS1500	N_Shore,N_Shore	SLC29A1;SLC29A1;SLC29A1;SLC29A1;SLC29A1,SLC29A1;SLC29A1;SLC29A1;SLC29A1;SLC29A1	NM_001078174;NM_001078176;NM_001078175;NM_004955;NM_001078177,NM_001078174;NM_001078176;NM_001078175;NM_004955;NM_001078177	hyper.chimp
6	44389326	44389727	2	cg22760420,cg00910127	TSS1500,TSS1500	S_Shore,S_Shore	AARS2,AARS2	NM_020745,NM_020745	hyper.chimp
6	44548300	44548472	2	cg25747655,cg13130022	_,_	_,_	_,_	_,_	hyper.chimp
6	45716916	45717345	2	cg02810149,cg13323416	_,_	_,_	_,_	_,_	hyper.chimp
6	46401530	46401821	2	cg06665622,cg19083007	TSS200,TSS1500	_,_	RCAN2,RCAN2	NM_005822,NM_005822	hypo.chimp
6	46811427	46811513	4	cg03700944,cg19702271,cg16536824,cg11874627	TSS1500;TSS200,TSS1500;TSS200,TSS1500;TSS200,TSS1500;TSS200	S_Shore,S_Shore,S_Shore,S_Shore	PLA2G7;PLA2G7,PLA2G7;PLA2G7,PLA2G7;PLA2G7,PLA2G7;PLA2G7	NM_005084;NM_001168357,NM_005084;NM_001168357,NM_005084;NM_001168357,NM_005084;NM_001168357	hypo.chimp
6	47552658	47552853	2	cg12968598,cg02130027	TSS1500,TSS1500	N_Shore,N_Shore	CD2AP,CD2AP	NM_012120,NM_012120	hyper.chimp
6	50800564	50800721	2	cg25049698,cg05650260	Body,Body	S_Shore,S_Shore	TFAP2D,TFAP2D	NM_172238,NM_172238	hypo.chimp
6	52279932	52279964	2	cg22237300,cg05624930	_,_	Island,Island	_,_	_,_	hyper.chimp
6	52637609	52638139	2	cg26861485,cg19987060	Body;Body,Body;Body	Island,S_Shore	LOC730101;LOC730101,LOC730101;LOC730101	NR_024405;NR_024403,NR_024405;NR_024403	hypo.chimp
6	53321978	53322217	4	cg24524396,cg20419072,cg01865606,cg10410213	TSS200,TSS200,TSS200,TSS1500	Island,Island,S_Shore,S_Shore	ELOVL5,ELOVL5,ELOVL5,ELOVL5	NM_021814,NM_021814,NM_021814,NM_021814	hypo.chimp
6	53638462	53638529	3	cg00536792,cg15658676,cg19801120	1stExon;5UTR,TSS200,TSS200	_,_	KLHL31;KLHL31,KLHL31,KLHL31	NM_001003760;NM_001003760,NM_001003760,NM_001003760
6	63054089	63054656	4	cg22014661,cg04398581,cg23926793,cg02217159	TSS200,TSS1500,TSS1500,TSS1500	Island,S_Shore,S_Shore,S_Shore	KHDRBS2,KHDRBS2,KHDRBS2,KHDRBS2	NM_152688,NM_152688,NM_152688,NM_152688
6	64339398	64339598	3	cg05394244,cg24631428,cg13770399	TSS1500,TSS1500,TSS1500	N_Shore,N_Shore,N_Shore	PTP4A1,PTP4A1,PTP4A1	NM_003463,NM_003463,NM_003463
6	72170043	72170137	2	cg19098437,cg20815778	Body,TSS200	_,_	MIR30A,MIR30A	NR_029504,NR_029504
6	73387018	73387079	2	cg03922126,cg03020545	TSS1500;TSS1500;TSS1500;TSS1500;TSS1500,TSS1500;TSS1500;TSS1500;TSS1500;TSS1500	N_Shore,N_Shore	KCNQ5;KCNQ5;KCNQ5;KCNQ5;KCNQ5,KCNQ5;KCNQ5;KCNQ5;KCNQ5;KCNQ5	NM_001160133;NM_019842;NM_001160134;NM_001160130;NM_001160132,NM_001160133;NM_019842;NM_001160134;NM_001160130;NM_001160132
6	74029799	74029849	2	cg21321162,cg06011334	TSS200,TSS1500	S_Shore,S_Shore	KHDC1,KHDC1	NM_030568,NM_030568
6	74076283	74076351	2	cg08289063,cg19690766	Body,Body	Island,Island	C6orf147,C6orf147	NR_027005,NR_027005
6	74217820	74218863	9	cg08905652,cg16390139,cg27279904,cg00463577,cg24713667,cg20758982,cg17162475,cg05525106,cg09527362	Body,Body,1stExon,1stExon;5UTR,TSS200,TSS200,TSS200,TSS200,TSS200	Island,Island,Island,Island,Island,Island,Island,Island,S_Shore	C6orf150,C6orf150,C6orf150,C6orf150;C6orf150,C6orf150,C6orf150,C6orf150,C6orf150,C6orf150	NM_138441,NM_138441,NM_138441,NM_138441;NM_138441,NM_138441,NM_138441,NM_138441,NM_138441,NM_138441	hyper.chimp
6	57144247	57144422	2	cg03117951,cg25319570	TSS1500,TSS1500	N_Shore,N_Shore	BAG2,BAG2	NM_004282,NM_004282	hypo.chimp
6	70557789	70557802	2	cg01735991,cg01386735	Body,Body	_,_	LMBRD1,LMBRD1	NM_018368,NM_018368	hypo.chimp
6	72354963	72355425	5	cg02778237,cg27384088,cg22827864,cg16115513,cg14389840	_,_	N_Shore,Island,Island,Island,S_Shore	_,_	_,_	hypo.chimp
6	74289990	74290361	3	cg21596313,cg21427300,cg21953307	_,_	Island,Island,S_Shore	_,_	_,_	hyper.chimp
6	80770127	80770301	2	cg24433016,cg08044663	TSS1500;TSS1500,TSS1500;TSS1500	N_Shore,N_Shore	TTK;TTK,TTK;TTK	NM_001166691;NM_003318,NM_001166691;NM_003318	hypo.chimp
6	83129119	83129241	2	cg14192087,cg02405813	TSS1500,TSS1500;TSS1500	N_Shore,N_Shore	TPBG,TPBG;TPBG	NM_006670,NM_001166392;NM_006670	hypo.chimp
6	84625476	84625609	2	cg25917853,cg17068311	TSS1500,TSS1500	N_Shore,N_Shore	CYB5R4,CYB5R4	NM_016230,NM_016230	hyper.chimp
6	84799955	84800019	4	cg11021849,cg19046216,cg25640892,cg10231737	TSS200,TSS200,TSS200,TSS200	N_Shore,N_Shore,N_Shore,N_Shore	MRAP2,MRAP2,MRAP2,MRAP2	NM_138409,NM_138409,NM_138409,NM_138409	hyper.chimp
6	86359527	86359669	3	cg24284910,cg07254821,cg15072625	Body;Body,Body;Body,Body;Body	N_Shore,N_Shore,N_Shore	SNX14;SNX14,SNX14;SNX14,SNX14;SNX14	NM_020468;NM_153816,NM_020468;NM_153816,NM_020468;NM_153816	hyper.chimp
6	88095742	88095750	2	cg22884082,cg23027296	5UTR;TSS200;5UTR,5UTR;TSS200;5UTR	_,_	C6orf162;GJB7;C6orf162,C6orf162;GJB7;C6orf162	NM_001042493;NM_198568;NM_020425,NM_001042493;NM_198568;NM_020425	hyper.chimp
6	89849248	89849396	2	cg14579997,cg21288889	Body,Body	S_Shore,S_Shore	PNRC1,PNRC1	NM_006813,NM_006813	hypo.chimp
6	97451392	97451554	2	cg00950244,cg14161400	Body,Body	N_Shore,N_Shore	NDUFAF4,NDUFAF4	NM_014165,NM_014165	hypo.chimp
6	99402191	99403026	3	cg12287785,cg03244411,cg10120816	_,_	N_Shore,Island,Island	_,_	_,_	hyper.chimp
6	99948962	99948965	2	cg05237015,cg05567646	TSS200,TSS200	S_Shore,S_Shore	COQ3,COQ3	NM_017421,NM_017421	hypo.chimp
6	106540137	106541089	3	cg10251594,cg08190928,cg15676707	_,_	N_Shore,Island,Island	_,_	_,_	hyper.chimp
6	106652677	106653517	8	cg02667677,cg23778363,cg24793124,cg17521665,cg14359052,cg24874254,cg08742502,cg17143179	Body;TSS1500,Body;TSS1500,Body;TSS1500,Body;TSS200,Body;TSS200,Body;TSS200,Body;TSS200,Body;1stExon;5UTR	_,_	PRDM1;PRDM1,PRDM1;PRDM1,PRDM1;PRDM1,PRDM1;PRDM1,PRDM1;PRDM1,PRDM1;PRDM1,PRDM1;PRDM1,PRDM1;PRDM1;PRDM1	NM_001198;NM_182907,NM_001198;NM_182907,NM_001198;NM_182907,NM_001198;NM_182907,NM_001198;NM_182907,NM_001198;NM_182907,NM_001198;NM_182907,NM_001198;NM_182907;NM_182907
6	108549221	108549599	2	cg15190445,cg25782375	_,_	S_Shore,S_Shore	_,_	_,_
6	108551199	108551613	5	cg25323841,cg26298967,cg17176470,cg02532824,cg03707974	_,_	S_Shelf,S_Shelf,S_Shelf,S_Shelf,S_Shelf	_,_	_,_
6	111386186	111386338	3	cg25531478,cg04140496,cg18873593	TSS1500,TSS1500,TSS200	N_Shore,N_Shore,Island	GTF3C6,GTF3C6,GTF3C6	NM_138408,NM_138408,NM_138408
6	116798075	116798958	3	cg15366353,cg12708994,cg09199072	TSS1500;5UTR,TSS1500;5UTR,1stExon;5UTR;5UTR	N_Shore,N_Shore,Island	DSE;DSE,DSE;DSE,DSE;DSE;DSE	NM_013352;NM_001080976,NM_013352;NM_001080976,NM_013352;NM_001080976;NM_013352
6	123142252	123142421	2	cg19097322,cg15042332	TSS200,5UTR;1stExon	_,_	FABP7,FABP7;FABP7	NM_001446,NM_001446;NM_001446	hyper.chimp
6	112188183	112188231	2	cg02816367,cg08061598	5UTR;TSS1500,5UTR;TSS1500	_,_	FYN;FYN,FYN;FYN	NM_002037;NM_153048,NM_002037;NM_153048	hypo.chimp
6	114288379	114288491	2	cg10474881,cg19203457	Body,3UTR	Island,S_Shore	MARCKS,MARCKS	NM_002356,NM_002356
6	119710925	119711071	2	cg08416875,cg19722656	Body,Body	N_Shore,N_Shore	MAN1A1,MAN1A1	NM_005907,NM_005907
6	134540836	134541112	2	cg14905466,cg03762694	TSS200;Body,Body;TSS1500	S_Shore,S_Shore	SGK1;SGK1,SGK1;SGK1	NM_001143677;NM_001143676,NM_001143676;NM_001143677
6	138934604	138934852	3	cg03379797,cg16292132,cg21543918	1stExon,1stExon;5UTR,1stExon;5UTR	_,_	NHSL1,NHSL1;NHSL1,NHSL1;NHSL1	NM_020464,NM_020464;NM_020464,NM_020464;NM_020464
6	150081359	150081460	4	cg06741198,cg10435706,cg26428073,cg01276381	TSS1500,TSS1500,TSS1500,TSS1500	S_Shore,S_Shore,S_Shore,S_Shore	LATS1,LATS1,LATS1,LATS1	NM_004690,NM_004690,NM_004690,NM_004690
6	150112390	150112420	2	cg17940234,cg08634157	TSS200,TSS200	Island,Island	PCMT1,PCMT1	NM_005389,NM_005389
6	151228104	151228204	2	cg05977992,cg06244016	TSS1500,TSS200	N_Shore,N_Shore	MTHFD1L,MTHFD1L	NM_015440,NM_015440
6	154874359	154874537	2	cg09288789,cg20019720	TSS1500,TSS1500	S_Shore,S_Shore	CNKSR3,CNKSR3	NM_173515,NM_173515
6	157948950	157949175	2	cg23707590,cg05750031	Body;Body,Body;Body	_,_	ZDHHC14;ZDHHC14,ZDHHC14;ZDHHC14	NM_153746;NM_024630,NM_153746;NM_024630
6	159004358	159004587	3	cg09245698,cg07637741,cg12934258	Body,Body,Body	_,_	SYTL3,SYTL3,SYTL3	NM_001009991,NM_001009991,NM_001009991
6	160102174	160102614	5	cg17952826,cg15298323,cg06131755,cg25736982,cg05504194	TSS1500,TSS1500,TSS1500,TSS1500,TSS1500	N_Shore,Island,Island,Island,Island	ACAT2,ACAT2,ACAT2,ACAT2,ACAT2	NM_005891,NM_005891,NM_005891,NM_005891,NM_005891
6	167968534	167968772	2	cg00310139,cg22321572	Body,Body	N_Shore,N_Shore	C6orf124,C6orf124	NR_027906,NR_027906
6	168160483	168161247	2	cg15371806,cg16912129	TSS1500;TSS1500,TSS200;TSS200	_,_	KIF25;KIF25,KIF25;KIF25	NM_005355;NM_030615,NM_005355;NM_030615
6	168372896	168373157	2	cg07828140,cg20606489	_,_	Island,Island	_,_	_,_
6	168407109	168407995	2	cg17064754,cg01076861	_,_	_,_	_,_	_,_
6	169806905	169807816	2	cg12761612,cg07385723	Body,Body	Island,N_Shore	WDR27,WDR27	NM_182552,NM_182552
7	578984	579748	4	cg21150288,cg02583740,cg05060486,cg00992090	Body;Body;Body;Body;Body;Body,Body;Body;Body;Body;Body;Body,Body;Body;Body;Body;Body;Body,Body;Body;Body;Body;Body;Body	N_Shore,Island,Island,Island	PRKAR1B;PRKAR1B;PRKAR1B;PRKAR1B;PRKAR1B;PRKAR1B,PRKAR1B;PRKAR1B;PRKAR1B;PRKAR1B;PRKAR1B;PRKAR1B,PRKAR1B;PRKAR1B;PRKAR1B;PRKAR1B;PRKAR1B;PRKAR1B,PRKAR1B;PRKAR1B;PRKAR1B;PRKAR1B;PRKAR1B;PRKAR1B	NM_001164759;NM_001164762;NM_001164758;NM_001164760;NM_001164761;NM_002735,NM_001164759;NM_001164762;NM_001164758;NM_001164760;NM_001164761;NM_002735,NM_001164759;NM_001164762;NM_001164758;NM_001164760;NM_001164761;NM_002735,NM_001164759;NM_001164762;NM_001164758;NM_001164760;NM_001164761;NM_002735
7	607863	608653	2	cg16304656,cg21381845	Body;Body;Body;Body;Body;Body,Body;Body;Body;Body;Body;Body	N_Shelf,N_Shelf	PRKAR1B;PRKAR1B;PRKAR1B;PRKAR1B;PRKAR1B;PRKAR1B,PRKAR1B;PRKAR1B;PRKAR1B;PRKAR1B;PRKAR1B;PRKAR1B	NM_001164759;NM_001164762;NM_001164758;NM_001164760;NM_001164761;NM_002735,NM_001164759;NM_001164762;NM_001164758;NM_001164760;NM_001164761;NM_002735
7	971274	971615	2	cg09363068,cg16245431	3UTR,3UTR	N_Shelf,N_Shelf	COX19,COX19	NM_001031617,NM_001031617
7	1046999	1047870	4	cg00435616,cg12581298,cg24642844,cg21495349	Body;Body;Body,Body;Body;Body,Body;Body;Body,Body;Body;Body	N_Shore,Island,S_Shore,S_Shore	C7orf50;C7orf50;C7orf50,C7orf50;C7orf50;C7orf50,C7orf50;C7orf50;C7orf50,C7orf50;C7orf50;C7orf50	NM_001134395;NM_032350;NM_001134396,NM_001134395;NM_032350;NM_001134396,NM_001134395;NM_032350;NM_001134396,NM_001134395;NM_032350;NM_001134396
7	2389757	2389949	2	cg05985135,cg22348713	_,_	S_Shelf,S_Shelf	_,_	_,_
7	2623645	2623873	2	cg08802482,cg13821785	_,_	_,_	_,_	_,_
7	4119479	4120394	2	cg27381557,cg06372919	Body,Body	N_Shore,Island	SDK1,SDK1	NM_152744,NM_152744
7	4314036	4314633	2	cg11746156,cg06137086	_,_	N_Shore,S_Shore	_,_	_,_
7	4750490	4750616	2	cg13589218,cg10118545	Body,Body	N_Shore,N_Shore	FOXK1,FOXK1	NM_001037165,NM_001037165
7	4843959	4844121	2	cg03697173,cg01847021	Body,Body	S_Shore,S_Shore	RADIL,RADIL	NM_018059,NM_018059
7	5259646	5259859	2	cg16451475,cg06595212	_,_	_,_	_,_	_,_
7	5829184	5830036	2	cg24986544,cg10139889	TSS200,Body	N_Shore,S_Shore	ZNF815,ZNF815	NR_023382,NR_023382
7	6380727	6380734	2	cg05725797,cg06200611	5UTR;5UTR;1stExon;1stExon,5UTR;5UTR;1stExon;1stExon	Island,Island	RAC1;RAC1;RAC1;RAC1,RAC1;RAC1;RAC1;RAC1	NM_006908;NM_018890;NM_006908;NM_018890,NM_006908;NM_018890;NM_006908;NM_018890
7	23212082	23212671	4	cg09755872,cg16180796,cg18081818,cg05407003	_,_	Island,Island,Island,Island	_,_	_,_
7	26157983	26158158	3	cg16882373,cg18844118,cg14534464	TSS1500,TSS1500,TSS1500	N_Shore,N_Shore,N_Shore	NFE2L3,NFE2L3,NFE2L3	NM_004289,NM_004289,NM_004289
7	27135487	27135733	2	cg09574499,cg14042889	Body,Body	N_Shore,N_Shore	HOXA4,HOXA4	NM_002141,NM_002141
7	27137728	27138053	5	cg25967031,cg15196806,cg15624376,cg20161965,cg08203284	TSS1500,TSS1500,TSS1500,TSS1500,TSS1500	S_Shore,S_Shore,S_Shore,S_Shore,S_Shore	HOXA4,HOXA4,HOXA4,HOXA4,HOXA4	NM_002141,NM_002141,NM_002141,NM_002141,NM_002141
7	27150116	27150900	3	cg02916332,cg26023912,cg14882265	TSS1500,TSS1500,TSS1500	Island,Island,Island	HOXA5,HOXA5,HOXA5	NM_019102,NM_019102,NM_019102
7	27159876	27160538	2	cg25727671,cg24389054	3UTR,3UTR	N_Shore,N_Shore	HOXA7,HOXA7	NM_006896,NM_006896
7	27166277	27166481	2	cg21608519,cg08981421	_,_	Island,Island	_,_	_,_
7	27183582	27184131	2	cg09636715,cg15864691	Body,Body	N_Shelf,N_Shore	HOXA10,HOXA10	NM_153715,NM_153715
7	27186574	27187508	2	cg05517976,cg08575233	TSS200,3UTR;TSS1500	S_Shore,S_Shore	HOXA10,HOXA11;HOXA10	NM_153715,NM_005523;NM_153715	hypo.chimp
6	123151440	123151602	3	cg01050920,cg12379307,cg19409187	TSS1500,TSS200,TSS200	N_Shore,N_Shore,N_Shore	SMPDL3A,SMPDL3A,SMPDL3A	NM_006714,NM_006714,NM_006714	hyper.chimp
6	124193152	124193202	2	cg13341412,cg03226666	Body,Body	_,_	NKAIN2,NKAIN2	NM_001040214,NM_001040214	hyper.chimp
6	132313241	132313281	2	cg14623917,cg24684168	Body,Body	Island,Island	CTGF,CTGF	NM_001901,NM_001901	hyper.chimp
6	133176397	133176447	2	cg18384235,cg24658452	TSS1500,TSS1500	N_Shore,N_Shore	RPS12,RPS12	NM_001016,NM_001016	hyper.chimp
6	133602917	133603323	2	cg17348951,cg06525347	TSS1500;TSS1500;TSS1500,TSS1500;TSS1500;TSS1500	N_Shore,N_Shore	EYA4;EYA4;EYA4,EYA4;EYA4;EYA4	NM_172105;NM_172103;NM_004100,NM_172105;NM_172103;NM_004100	hyper.chimp
6	143813474	143813480	2	cg16388791,cg22025132	1stExon;TSS200,1stExon;TSS200	Island,Island	ADAT2;PEX3,ADAT2;PEX3	NM_182503;NM_003630,NM_182503;NM_003630	hyper.chimp
6	144428111	144428208	5	cg09293391,cg25291978,cg04895233,cg25535418,cg10254692	TSS1500;TSS1500,TSS1500;TSS1500,TSS1500;TSS1500,TSS1500;TSS1500,TSS1500;TSS1500	S_Shore,S_Shore,S_Shore,S_Shore,S_Shore	PLAGL1;PLAGL1,PLAGL1;PLAGL1,PLAGL1;PLAGL1,PLAGL1;PLAGL1,PLAGL1;PLAGL1	NM_001080955;NM_001080951,NM_001080955;NM_001080951,NM_001080955;NM_001080951,NM_001080955;NM_001080951,NM_001080955;NM_001080951	hyper.chimp
6	146390309	146392737	14	cg26560871,cg09179079,cg21725954,cg19512268,cg03478199,cg23696752,cg08958294,cg08076125,cg13722123,cg06015218,cg09558195,cg07218663,cg16671069,cg24266105	TSS200;TSS200,TSS200;TSS200,5UTR;1stExon;5UTR;1stExon,5UTR;1stExon;5UTR;1stExon,5UTR;1stExon;5UTR;1stExon,5UTR;5UTR,5UTR;5UTR,5UTR;5UTR,5UTR;5UTR,5UTR;5UTR,5UTR;5UTR,5UTR;5UTR,Body;Body,Body;Body	N_Shore,N_Shore,N_Shore,N_Shore,N_Shore,N_Shore,N_Shore,N_Shore,N_Shore,N_Shore,Island,Island,S_Shore,S_Shore	GRM1;GRM1,GRM1;GRM1,GRM1;GRM1;GRM1;GRM1,GRM1;GRM1;GRM1;GRM1,GRM1;GRM1;GRM1;GRM1,GRM1;GRM1,GRM1;GRM1,GRM1;GRM1,GRM1;GRM1,GRM1;GRM1,GRM1;GRM1,GRM1;GRM1,GRM1;GRM1,GRM1;GRM1	NM_000838;NM_001114329,NM_000838;NM_001114329,NM_001114329;NM_001114329;NM_000838;NM_000838,NM_001114329;NM_001114329;NM_000838;NM_000838,NM_001114329;NM_001114329;NM_000838;NM_000838,NM_001114329;NM_000838,NM_001114329;NM_000838,NM_001114329;NM_000838,NM_001114329;NM_000838,NM_001114329;NM_000838,NM_001114329;NM_000838,NM_001114329;NM_000838,NM_001114329;NM_000838,NM_001114329;NM_000838	hyper.chimp
6	150388414	150388551	3	cg07579404,cg23231670,cg08631427	TSS200,TSS200,TSS200	_,_	RAET1L,RAET1L,RAET1L	NM_130900,NM_130900,NM_130900	hyper.chimp
6	150505110	150505193	2	cg16979070,cg20134151	TSS1500,TSS1500	N_Shore,N_Shore	PPP1R14C,PPP1R14C	NM_030949,NM_030949	hyper.chimp
6	151229030	151229952	2	cg11599612,cg16336494	Body,Body	Island,S_Shore	MTHFD1L,MTHFD1L	NM_015440,NM_015440	hyper.chimp
6	155579593	155579636	3	cg09364590,cg04228709,cg21707172	Body;TSS200,Body;TSS200,Body;TSS200	N_Shelf,N_Shelf,N_Shelf	TIAM2;TIAM2,TIAM2;TIAM2,TIAM2;TIAM2	NM_012454;NM_001010927,NM_012454;NM_001010927,NM_012454;NM_001010927	hyper.chimp
6	155818691	155818867	3	cg21792737,cg07012823,cg21765730	1stExon;5UTR,TSS200,TSS200	_,_	NOX3;NOX3,NOX3,NOX3	NM_015718;NM_015718,NM_015718,NM_015718
6	156759869	156760238	4	cg07292773,cg21795221,cg09056876,cg20021506	_,_	Island,Island,Island,Island	_,_	_,_
6	159280061	159280972	4	cg16073143,cg03739955,cg21583723,cg21497977	_,_	N_Shore,Island,Island,S_Shore	_,_	_,_
6	160473993	160474664	2	cg18105725,cg12197457	Body;Body,Body;Body	N_Shore,Island	SLC22A1;SLC22A1,SLC22A1;SLC22A1	NM_003057;NM_153187,NM_003057;NM_153187
6	161178411	161178446	2	cg09618640,cg15386877	_,_	_,_	_,_	_,_
6	163676921	163677038	2	cg17160525,cg07567256	_,_	_,_	_,_	_,_
6	164208613	164208804	2	cg00056541,cg05681560	_,_	_,_	_,_	_,_
6	166152627	166153054	3	cg24480453,cg04434244,cg05310694	_,_	_,_	_,_	_,_
6	166183618	166183700	2	cg22809491,cg27239981	_,_	N_Shelf,N_Shelf	_,_	_,_
6	166187261	166188173	5	cg05295566,cg02621130,cg00849713,cg06341957,cg16051195	_,_	N_Shore,Island,Island,Island,Island	_,_	_,_
6	166338789	166339128	4	cg21749424,cg19251564,cg20769926,cg08795949	_,_	N_Shelf,N_Shelf,N_Shelf,N_Shelf	_,_	_,_
6	166431176	166431904	2	cg19625866,cg02655195	_,_	_,_	_,_	_,_
6	166990043	166990606	3	cg00271210,cg20486651,cg00278517	Body,Body,Body	_,_	RPS6KA2,RPS6KA2,RPS6KA2	NM_001006932,NM_001006932,NM_001006932
6	167331351	167331496	2	cg12798992,cg17024719	TSS1500;TSS1500,TSS1500;TSS1500	N_Shore,N_Shore	FGFR1OP;FGFR1OP,FGFR1OP;FGFR1OP	NM_194429;NM_007045,NM_194429;NM_007045
6	167683809	167684513	3	cg23136799,cg08066917,cg06157170	_,_	N_Shore,N_Shore,Island	_,_	_,_
6	168178763	168179202	5	cg24246628,cg08476511,cg12003941,cg18319852,cg14316629	Body;Body,Body;Body,Body;Body,Body;Body,Body;Body	Island,Island,Island,S_Shore,S_Shore	KIF25;KIF25,KIF25;KIF25,KIF25;KIF25,KIF25;KIF25,KIF25;KIF25	NM_005355;NM_030615,NM_005355;NM_030615,NM_005355;NM_030615,NM_005355;NM_030615,NM_005355;NM_030615
6	168233243	168233538	3	cg09875471,cg09211372,cg18258564	_,_	_,_	_,_	_,_
6	168245190	168245616	2	cg11347582,cg24993576	_,_	Island,Island	_,_	_,_
6	168668482	168668547	3	cg19641625,cg08495245,cg22333897	Body;Body,Body;Body,Body;Body	_,_	SMOC2;SMOC2,SMOC2;SMOC2,SMOC2;SMOC2	NM_022138;NM_001166412,NM_022138;NM_001166412,NM_022138;NM_001166412
6	169797080	169797257	2	cg11938672,cg18322025	Body,Body	_,N_Shelf	WDR27,WDR27	NM_182552,NM_182552
6	170373292	170373360	2	cg14582154,cg14114043	_,_	S_Shore,S_Shore	_,_	_,_
6	170439251	170439419	2	cg23191576,cg11519760	Body,Body	Island,Island	DLL1,DLL1	NM_005618,NM_005618
7	829302	829325	2	cg07050101,cg01160695	5UTR;5UTR,5UTR;5UTR	Island,Island	UNC84A;UNC84A,UNC84A;UNC84A	NM_001130965;NM_025154,NM_001130965;NM_025154
7	2410274	2410536	2	cg01719895,cg12030710	5UTR,5UTR	Island,Island	CHST12,CHST12	NM_018641,NM_018641
7	2638074	2639723	5	cg19506025,cg15934804,cg23694492,cg09956615,cg09055236	TSS200,Body,Body,Body,Body	Island,S_Shore,S_Shore,S_Shore,S_Shore	TTYH3,TTYH3,TTYH3,TTYH3,TTYH3	NM_025250,NM_025250,NM_025250,NM_025250,NM_025250
7	2647895	2647962	2	cg26551200,cg17550566	Body,Body	_,_	TTYH3,TTYH3	NM_025250,NM_025250
7	4142181	4142391	3	cg11780546,cg06621691,cg13153353	Body;Body,Body;Body,Body;Body	_,_	SDK1;SDK1,SDK1;SDK1,SDK1;SDK1	NR_027816;NM_152744,NR_027816;NM_152744,NR_027816;NM_152744
7	4150502	4150880	2	cg04612959,cg01572891	Body;Body,Body;Body	_,_	SDK1;SDK1,SDK1;SDK1	NR_027816;NM_152744,NR_027816;NM_152744
7	4730969	4731467	2	cg15176413,cg20349812	Body,Body	N_Shore,Island	FOXK1,FOXK1	NM_001037165,NM_001037165
7	5355307	5357637	11	cg12845678,cg18629514,cg06947694,cg20025824,cg18250135,cg25148306,cg04939944,cg04193909,cg17199010,cg10327399,cg10211530	Body,Body,Body,Body,Body,Body,Body,Body,Body,Body,Body	N_Shelf,N_Shelf,N_Shelf,N_Shore,N_Shore,N_Shore,N_Shore,N_Shore,N_Shore,N_Shore,N_Shore	TNRC18,TNRC18,TNRC18,TNRC18,TNRC18,TNRC18,TNRC18,TNRC18,TNRC18,TNRC18,TNRC18	NM_001080495,NM_001080495,NM_001080495,NM_001080495,NM_001080495,NM_001080495,NM_001080495,NM_001080495,NM_001080495,NM_001080495,NM_001080495
7	5501074	5501124	2	cg07147863,cg08719049	Body,Body	Island,Island	FBXL18,FBXL18	NM_024963,NM_024963
7	5828975	5829135	3	cg09184043,cg13750180,cg26457878	TSS1500,TSS1500,TSS200	N_Shore,N_Shore,N_Shore	ZNF815,ZNF815,ZNF815	NR_023382,NR_023382,NR_023382
7	6670058	6670719	5	cg22541520,cg01447112,cg05732750,cg26503073,cg25573915	_,_	Island,Island,Island,Island,S_Shore	_,_	_,_
7	12576459	12576603	2	cg20328736,cg10915772	TSS1500,TSS200	N_Shore,N_Shore	SCIN,SCIN	NM_001112706,NM_001112706
7	20785292	20785453	3	cg25859099,cg23243400,cg05984317	_,_	S_Shore,S_Shore,S_Shore	_,_	_,_
7	22089722	22089840	2	cg19544459,cg23618638	_,_	S_Shore,S_Shore	_,_	_,_
7	23686186	23686207	2	cg18857889,cg04215179	TSS200;TSS200;TSS200,TSS200;TSS200;TSS200	Island,Island	C7orf46;C7orf46;C7orf46,C7orf46;C7orf46;C7orf46	NM_199136;NM_001127364;NM_001127365,NM_199136;NM_001127364;NM_001127365
7	24984965	24985120	3	cg25578967,cg23191354,cg01591025	5UTR;5UTR;5UTR;5UTR,5UTR;5UTR;5UTR;5UTR,5UTR;5UTR;5UTR;5UTR	N_Shore,N_Shore,N_Shore	OSBPL3;OSBPL3;OSBPL3;OSBPL3,OSBPL3;OSBPL3;OSBPL3;OSBPL3,OSBPL3;OSBPL3;OSBPL3;OSBPL3	NM_015550;NM_145322;NM_145320;NM_145321,NM_015550;NM_145322;NM_145320;NM_145321,NM_015550;NM_145322;NM_145320;NM_145321
7	25958877	25959026	3	cg04939200,cg25573884,cg14536372	_,_	S_Shore,S_Shore,S_Shore	_,_	_,_
7	30602287	30602701	4	cg21429551,cg03068497,cg16875104,cg19390658	Body,Body,Body,Body	S_Shore,S_Shore,S_Shore,S_Shore	GARS,GARS,GARS,GARS	NM_002047,NM_002047,NM_002047,NM_002047
7	31140843	31140993	2	cg17844606,cg03453916	_,_	_,_	_,_	_,_
7	34327485	34327577	2	cg20659752,cg05813788	_,_	_,_	_,_	_,_
7	35044607	35044794	2	cg13068698,cg24927974	TSS1500,TSS1500	S_Shore,S_Shore	DPY19L1,DPY19L1	NM_015283,NM_015283
7	35701544	35701833	3	cg06466797,cg23759826,cg11075346	TSS1500,TSS1500,TSS1500	S_Shore,S_Shore,S_Shore	HERPUD2,HERPUD2,HERPUD2	NM_022373,NM_022373,NM_022373
7	37498266	37498343	2	cg06257983,cg22674202	_,_	_,_	_,_	_,_
7	38317463	38317751	4	cg06132400,cg25335841,cg07076816,cg00739278	_,_	Island,Island,Island,Island	_,_	_,_
7	38982069	38982453	2	cg13319711,cg07291445	_,_	Island,Island	_,_	_,_
7	43117693	43118546	5	cg04442388,cg25803632,cg01971676,cg05380503,cg13298841	TSS1500,TSS1500,TSS1500,TSS1500,TSS200	N_Shore,N_Shore,N_Shore,N_Shore,Island	HECW1,HECW1,HECW1,HECW1,HECW1	NM_015052,NM_015052,NM_015052,NM_015052,NM_015052
7	43932143	43932216	3	cg13088374,cg15262984,cg08084737	5UTR;TSS1500,5UTR;TSS1500,5UTR;TSS1500	N_Shore,N_Shore,N_Shore	URGCP;UBE2D4,URGCP;UBE2D4,URGCP;UBE2D4	NM_001077664;NM_015983,NM_001077664;NM_015983,NM_001077664;NM_015983	hyper.chimp
7	27199072	27200005	3	cg10083572,cg04707408,cg21332500	_,_	Island,Island,S_Shore	_,_	_,_	hypo.chimp
7	27464998	27465004	2	cg18466498,cg10766172	_,_	_,_	_,_	_,_	hypo.chimp
7	29996279	29996301	2	cg13366537,cg08551725	TSS1500;TSS200;Body;TSS1500,TSS1500;TSS200;Body;TSS1500	Island,Island	SCRN1;SCRN1;SCRN1;SCRN1,SCRN1;SCRN1;SCRN1;SCRN1	NM_014766;NM_001145513;NM_001145514;NM_001145515,NM_014766;NM_001145513;NM_001145514;NM_001145515	hypo.chimp
7	31341387	31341845	2	cg02872491,cg10413352	_,_	N_Shore,N_Shore	_,_	_,_	hypo.chimp
7	32077762	32077867	2	cg21530649,cg14465747	TSS1500,TSS1500	S_Shore,S_Shore	PDE1C,PDE1C	NM_005020,NM_005020	hypo.chimp
7	44071109	44072289	8	cg21448875,cg07075347,cg26057752,cg16627090,cg12631925,cg23616741,cg21088488,cg01953390	Body,1stExon,1stExon,1stExon,TSS200,TSS1500,TSS1500,TSS1500	N_Shore,Island,Island,Island,S_Shore,S_Shore,S_Shore,S_Shore	PGAM2,PGAM2,PGAM2,PGAM2,PGAM2,PGAM2,PGAM2,PGAM2	NM_000290,NM_000290,NM_000290,NM_000290,NM_000290,NM_000290,NM_000290,NM_000290	hyper.chimp
7	44109815	44109963	2	cg08495088,cg12955216	TSS1500,TSS1500	_,_	AEBP1,AEBP1	NM_001129,NM_001129	hyper.chimp
7	45154427	45154610	2	cg22500876,cg14833891	_,_	_,_	_,_	_,_	hypo.chimp
7	45266141	45266291	3	cg15970595,cg16518614,cg27630885	_,_	_,_	_,_	_,_	hyper.chimp
7	47542669	47543105	2	cg04879211,cg11203616	5UTR,5UTR	N_Shore,Island	TNS3,TNS3	NM_022748,NM_022748	hyper.chimp
7	47750193	47750474	2	cg25134328,cg25783361	_,_	_,_	_,_	_,_	hyper.chimp
7	47998084	47998325	2	cg12434944,cg22796922	Body;Body,Body;Body	_,_	SUNC1;SUNC1,SUNC1;SUNC1	NM_152782;NM_001030019,NM_152782;NM_001030019	hyper.chimp
7	50103087	50103523	6	cg27094076,cg17237506,cg13000496,cg07750378,cg27183007,cg16261619	Body;Body,Body;Body,Body;Body,1stExon;1stExon,TSS200;TSS200,TSS200;TSS200	N_Shore,Island,Island,Island,S_Shore,S_Shore	ZPBP;ZPBP,ZPBP;ZPBP,ZPBP;ZPBP,ZPBP;ZPBP,ZPBP;ZPBP,ZPBP;ZPBP	NM_001159878;NM_007009,NM_001159878;NM_007009,NM_001159878;NM_007009,NM_007009;NM_001159878,NM_001159878;NM_007009,NM_001159878;NM_007009	hyper.chimp
7	51506415	51507172	7	cg07114310,cg02897667,cg10614809,cg06593753,cg07537562,cg08767820,cg16921727	_,_	_,_	_,_	_,_	hyper.chimp
7	52123323	52123983	3	cg11342198,cg24233426,cg18793404	_,_	_,_	_,_	_,_	hyper.chimp
7	53222441	53222477	2	cg17678740,cg25550279	_,_	N_Shore,Island	_,_	_,_	hypo.chimp
7	53254086	53254620	3	cg25573227,cg01019587,cg26344227	_,_	N_Shore,Island,Island	_,_	_,_	hyper.chimp
7	55114568	55114652	2	cg14688342,cg10550611	Body;Body;Body;Body,Body;Body;Body;Body	_,_	EGFR;EGFR;EGFR;EGFR,EGFR;EGFR;EGFR;EGFR	NM_201283;NM_201284;NM_201282;NM_005228,NM_201283;NM_201284;NM_201282;NM_005228	hypo.chimp
7	55192237	55192677	7	cg05530630,cg05898452,cg18071865,cg02316066,cg16589260,cg21808635,cg20706768	Body;Body;Body,Body;Body;Body,Body;Body;Body,Body;Body;Body,Body;Body;Body,Body;Body;Body,Body;Body;Body	_,_	EGFR;EGFR;EGFR,EGFR;EGFR;EGFR,EGFR;EGFR;EGFR,EGFR;EGFR;EGFR,EGFR;EGFR;EGFR,EGFR;EGFR;EGFR,EGFR;EGFR;EGFR	NM_201284;NM_201282;NM_005228,NM_201284;NM_201282;NM_005228,NM_201284;NM_201282;NM_005228,NM_201284;NM_201282;NM_005228,NM_201284;NM_201282;NM_005228,NM_201284;NM_201282;NM_005228,NM_201284;NM_201282;NM_005228	hypo.chimp
7	56128211	56128387	5	cg15666071,cg26422861,cg17603988,cg08370546,cg21940640	TSS200,TSS200,TSS200,TSS200,TSS1500	_,_	PHKG1,PHKG1,PHKG1,PHKG1,PHKG1	NM_006213,NM_006213,NM_006213,NM_006213,NM_006213	hypo.chimp
7	63986175	63987585	7	cg02097674,cg00287974,cg13990351,cg01129004,cg13100965,cg16681239,cg26451415	_,_	N_Shore,N_Shore,N_Shore,N_Shore,Island,Island,Island	_,_	_,_	hyper.chimp
7	65084763	65085057	3	cg09796320,cg15893346,cg18219226	TSS200,TSS1500,TSS1500	Island,S_Shore,S_Shore	GUSB,GUSB,GUSB	NM_000181,NM_000181,NM_000181	hypo.chimp
7	65146297	65147013	4	cg24568150,cg02423318,cg04406873,cg15652178	_,_	N_Shore,Island,Island,Island	_,_	_,_	hyper.chimp
7	65607220	65607573	2	cg18782651,cg10342821	_,_	N_Shore,Island	_,_	_,_	hypo.chimp
7	69932447	69932461	2	cg19560710,cg25795398	_,_	_,_	_,_	_,_	hyper.chimp
7	72476537	72476712	3	cg03492827,cg12210255,cg13598010	_,_	Island,Island,Island	_,_	_,_	hyper.chimp
7	72631465	72631701	3	cg20004424,cg07452164,cg04669894	TSS1500,TSS1500,TSS1500	S_Shore,S_Shore,S_Shore	TBL2,TBL2,TBL2	NM_012453,NM_012453,NM_012453	hypo.chimp
7	72723617	72723690	2	cg24114936,cg15881597	Body,3UTR	S_Shelf,S_Shelf	VPS37D,VPS37D	NM_001077621,NM_001077621
7	72883039	72884342	6	cg21838924,cg15441831,cg16454130,cg04779752,cg17787108,cg02874145	TSS200,TSS200,1stExon;5UTR,1stExon;5UTR,1stExon,3UTR;1stExon	N_Shore,N_Shore,Island,Island,Island,S_Shore	CLDN4,CLDN4,CLDN4;CLDN4,CLDN4;CLDN4,CLDN4,CLDN4;CLDN4	NM_001305,NM_001305,NM_001305;NM_001305,NM_001305;NM_001305,NM_001305,NM_001305;NM_001305	hyper.chimp
7	72821330	72822156	3	cg12169661,cg24419391,cg06101212	3UTR;1stExon,3UTR;1stExon,1stExon	Island,Island,Island	CLDN3;CLDN3,CLDN3;CLDN3,CLDN3	NM_001306;NM_001306,NM_001306;NM_001306,NM_001306	hypo.chimp
7	73424462	73425310	2	cg23933095,cg10052687	Body;Body,Body;Body	N_Shelf,N_Shelf	CLIP2;CLIP2,CLIP2;CLIP2	NM_032421;NM_003388,NM_032421;NM_003388	hypo.chimp
7	75462363	75462635	3	cg06293365,cg15507475,cg03214087	TSS1500,TSS1500,TSS1500	S_Shore,S_Shore,S_Shore	TMEM120A,TMEM120A,TMEM120A	NM_031925,NM_031925,NM_031925	hypo.chimp
7	75617406	75617793	3	cg23604683,cg06827198,cg14329783	_,_	N_Shore,Island,Island	_,_	_,_	hypo.chimp
7	75864789	75865002	3	cg09916572,cg08016802,cg20352798	5UTR;1stExon;Body,5UTR;1stExon;Body,5UTR;1stExon;Body	Island,Island,Island	ZP3;ZP3;SRCRB4D,ZP3;ZP3;SRCRB4D,ZP3;ZP3;SRCRB4D	NM_007155;NM_007155;NM_080744,NM_007155;NM_007155;NM_080744,NM_007155;NM_007155;NM_080744
7	77507633	77507952	4	cg24543015,cg25914921,cg01239112,cg05763154	Body,Body,Body,Body	Island,Island,Island,Island	MAGI2,MAGI2,MAGI2,MAGI2	NM_012301,NM_012301,NM_012301,NM_012301
7	86688293	86688434	3	cg27455578,cg20172885,cg02984009	TSS1500,TSS1500,TSS1500	S_Shore,S_Shore,S_Shore	C7orf23,C7orf23,C7orf23	NM_024315,NM_024315,NM_024315
7	90176491	90176797	2	cg03112433,cg15798153	TSS200,1stExon	_,_	CDK14,CDK14	NM_012395,NM_012395
7	93358463	93358502	2	cg13328713,cg19103770	TSS1500,TSS1500	S_Shore,S_Shore	TFPI2,TFPI2	NM_006528,NM_006528
7	93861244	93861805	2	cg24406898,cg09146903	TSS1500,TSS200	_,_	COL1A2,COL1A2	NM_000089,NM_000089
7	94124199	94124605	4	cg21771834,cg27001184,cg03384175,cg20041873	TSS1500;5UTR;TSS1500;5UTR;TSS1500,TSS1500;5UTR;TSS1500;5UTR;TSS1500,TSS1500;5UTR;TSS1500;5UTR;TSS1500,TSS1500;5UTR;TSS1500;5UTR;TSS1500	Island,Island,Island,S_Shore	SGCE;PEG10;SGCE;PEG10;SGCE,SGCE;PEG10;SGCE;PEG10;SGCE,SGCE;PEG10;SGCE;PEG10;SGCE,SGCE;PEG10;SGCE;PEG10;SGCE	NM_001099401;NM_015068;NM_001099400;NM_001040152;NM_003919,NM_001099401;NM_015068;NM_001099400;NM_001040152;NM_003919,NM_001099401;NM_015068;NM_001099400;NM_001040152;NM_003919,NM_001099401;NM_015068;NM_001099400;NM_001040152;NM_003919
7	94791589	94792080	8	cg07404485,cg05342682,cg04155289,cg19678392,cg21856205,cg17330251,cg01874867,cg20119798	Body,Body,1stExon,1stExon;5UTR,1stExon;5UTR,TSS200,TSS200,TSS1500	N_Shore,N_Shore,Island,Island,Island,Island,S_Shore,S_Shore	PON1,PON1,PON1,PON1;PON1,PON1;PON1,PON1,PON1,PON1	NM_000446,NM_000446,NM_000446,NM_000446;NM_000446,NM_000446;NM_000446,NM_000446,NM_000446,NM_000446
7	94863343	94864184	16	cg22784187,cg08167951,cg23230584,cg08520743,cg08828819,cg15927196,cg15500865,cg25572105,cg25161512,cg11435506,cg27413563,cg04080282,cg26457160,cg10329418,cg27166921,cg08461772	Body,1stExon,TSS200,TSS200,TSS200,TSS1500,TSS1500,TSS1500,TSS1500,TSS1500,TSS1500,TSS1500,TSS1500,TSS1500,TSS1500,TSS1500	N_Shore,Island,Island,Island,Island,Island,Island,Island,Island,Island,Island,Island,Island,S_Shore,S_Shore,S_Shore	PON3,PON3,PON3,PON3,PON3,PON3,PON3,PON3,PON3,PON3,PON3,PON3,PON3,PON3,PON3,PON3	NM_000940,NM_000940,NM_000940,NM_000940,NM_000940,NM_000940,NM_000940,NM_000940,NM_000940,NM_000940,NM_000940,NM_000940,NM_000940,NM_000940,NM_000940,NM_000940
7	97938105	97938355	3	cg06195987,cg11107212,cg15383322	_,_	Island,Island,S_Shore	_,_	_,_
7	98988034	98988047	2	cg24012595,cg14682846	TSS1500,TSS1500	S_Shore,S_Shore	C7orf38,C7orf38	NM_145111,NM_145111
7	99562048	99562180	3	cg24028459,cg26425691,cg24542725	TSS1500,TSS200,TSS200	N_Shore,N_Shore,N_Shore	MBLAC1,MBLAC1,MBLAC1	NM_203397,NM_203397,NM_203397
7	100037888	100037945	4	cg26777475,cg06402330,cg27069566,cg02797569	1stExon;5UTR,1stExon;5UTR,1stExon;5UTR,1stExon;5UTR	N_Shore,N_Shore,N_Shore,N_Shore	PCOLCE;PCOLCE,PCOLCE;PCOLCE,PCOLCE;PCOLCE,PCOLCE;PCOLCE	NM_002593;NM_002593,NM_002593;NM_002593,NM_002593;NM_002593,NM_002593;NM_002593
7	100272919	100273128	2	cg01903971,cg08302003	_,_	Island,Island	_,_	_,_
7	100630780	100632367	6	cg00159289,cg00836662,cg10147075,cg18046464,cg02258703,cg10333402	1stExon,TSS200,TSS1500,TSS1500,TSS1500,TSS1500	N_Shore,N_Shore,Island,Island,Island,Island	MOGAT3,MOGAT3,MOGAT3,MOGAT3,MOGAT3,MOGAT3	NM_178176,NM_178176,NM_178176,NM_178176,NM_178176,NM_178176
7	100708663	100708712	2	cg09403190,cg14846372	_,_	_,_	_,_	_,_
7	101555396	101555594	3	cg11911769,cg09244071,cg15755348	Body;Body;Body,Body;Body;Body,Body;Body;Body	_,_	CUX1;CUX1;CUX1,CUX1;CUX1;CUX1,CUX1;CUX1;CUX1	NM_181500;NM_181552;NM_001913,NM_181500;NM_181552;NM_001913,NM_181500;NM_181552;NM_001913
7	102707559	102708007	3	cg14337134,cg15401523,cg21525314	Body;Body,Body;Body,Body;TSS200	Island,Island,Island	DPY19L2P2;DPY19L2P2,DPY19L2P2;DPY19L2P2,DPY19L2P2;DPY19L2P2	NR_027768;NR_003561,NR_027768;NR_003561,NR_027768;NR_003561
7	103635348	103636038	3	cg12302377,cg02020528,cg00200074	Body;Body,TSS1500;TSS1500,TSS1500;TSS1500	_,_	ORC5L;ORC5L,ORC5L;ORC5L,ORC5L;ORC5L	NM_002553;NM_181747,NM_002553;NM_181747,NM_002553;NM_181747
7	104656425	104656524	2	cg18041893,cg13950905	Body;Body,Body;Body	_,_	SRPK2;SRPK2,SRPK2;SRPK2	NM_182691;NM_182692,NM_182691;NM_182692
7	111818610	111819382	2	cg21761811,cg02507480	_,_	N_Shore,Island	_,_	_,_
7	112218008	112218015	2	cg13391638,cg26371512	TSS1500,TSS1500	S_Shore,S_Shore	TMEM168,TMEM168	NM_022484,NM_022484
7	113842310	113842440	2	cg01306563,cg19655952	1stExon;5UTR;5UTR;1stExon;5UTR;1stExon,1stExon;5UTR;5UTR;1stExon;5UTR;1stExon	_,_	FOXP2;FOXP2;FOXP2;FOXP2;FOXP2;FOXP2,FOXP2;FOXP2;FOXP2;FOXP2;FOXP2;FOXP2	NM_148898;NM_148898;NM_148899;NM_014491;NM_014491;NM_148899,NM_148898;NM_148898;NM_148899;NM_014491;NM_014491;NM_148899
7	124191480	124191708	3	cg26278103,cg23799901,cg27533119	1stExon,1stExon,1stExon	Island,Island,N_Shore	GPR37,GPR37,GPR37	NM_005302,NM_005302,NM_005302
7	127628862	127629163	2	cg21566081,cg19500766	_,_	Island,S_Shore	_,_	_,_
7	127694125	127695120	3	cg00147849,cg11859982,cg21292068	_,_	N_Shelf,N_Shelf,N_Shelf	_,_	_,_
7	127834677	127834688	2	cg07017242,cg16409368	Body;Body;Body;TSS1500;TSS1500;Body;TSS1500,Body;Body;Body;TSS1500;TSS1500;Body;TSS1500	S_Shore,S_Shore	IMPDH1;IMPDH1;IMPDH1;IMPDH1;IMPDH1;IMPDH1;IMPDH1,IMPDH1;IMPDH1;IMPDH1;IMPDH1;IMPDH1;IMPDH1;IMPDH1	NM_001142576;NM_183243;NM_000883;NM_001142573;NM_001142574;NM_001102605;NM_001142575,NM_001142576;NM_183243;NM_000883;NM_001142573;NM_001142574;NM_001102605;NM_001142575
7	128338168	128338203	2	cg04729004,cg07046546	TSS200;TSS200,TSS200;TSS200	S_Shore,S_Shore	KCP;KCP,KCP;KCP	NM_001135914;NM_199349,NM_001135914;NM_199349
7	128571333	128571678	4	cg00566516,cg00269643,cg17405908,cg11303670	TSS1500,TSS1500,TSS1500,TSS1500	N_Shore,N_Shore,N_Shore,N_Shore	TSPAN33,TSPAN33,TSPAN33,TSPAN33	NM_178562,NM_178562,NM_178562,NM_178562
7	129912955	129914107	12	cg22115706,cg04029027,cg02490034,cg11865119,cg09059945,cg01793704,cg16511229,cg02169391,cg08077673,cg01888566,cg05373657,cg15164103	TSS1500,TSS1500,TSS1500,TSS200,TSS200,TSS200,1stExon;5UTR,1stExon;5UTR,5UTR,5UTR,5UTR,5UTR	N_Shore,N_Shore,N_Shore,N_Shore,Island,Island,Island,Island,Island,Island,Island,S_Shore	MEST,MEST,MEST,MEST,MEST,MEST,MEST;MEST,MEST;MEST,MEST,MEST,MEST,MEST	NM_177524,NM_177524,NM_177524,NM_177524,NM_177524,NM_177524,NM_177524;NM_177524,NM_177524;NM_177524,NM_177524,NM_177524,NM_177524,NM_177524
7	140897327	140898102	4	cg11030575,cg24001514,cg25473596,cg07640820	TSS1500,TSS200,TSS200,5UTR	N_Shore,N_Shore,N_Shore,S_Shore	AGK,AGK,AGK,AGK	NM_018238,NM_018238,NM_018238,NM_018238	hyper.chimp
7	81237244	81237683	6	cg06055763,cg08005849,cg23838245,cg06745740,cg22543992,cg15567428	5UTR;1stExon;1stExon;1stExon;5UTR;1stExon;5UTR;5UTR;5UTR;1stExon,5UTR;1stExon;1stExon;1stExon;5UTR;1stExon;5UTR;5UTR;5UTR;1stExon,TSS200;TSS200;TSS200;TSS200;TSS200,TSS200;TSS200;TSS200;TSS200;TSS200,TSS1500;TSS1500;TSS1500;TSS1500;TSS1500,TSS1500;TSS1500;TSS1500;TSS1500;TSS1500	_,_	HGF;HGF;HGF;HGF;HGF;HGF;HGF;HGF;HGF;HGF,HGF;HGF;HGF;HGF;HGF;HGF;HGF;HGF;HGF;HGF,HGF;HGF;HGF;HGF;HGF,HGF;HGF;HGF;HGF;HGF,HGF;HGF;HGF;HGF;HGF,HGF;HGF;HGF;HGF;HGF	NM_001010932;NM_001010934;NM_001010931;NM_000601;NM_001010931;NM_001010933;NM_001010934;NM_001010933;NM_000601;NM_001010932,NM_001010932;NM_001010934;NM_001010931;NM_000601;NM_001010931;NM_001010933;NM_001010934;NM_001010933;NM_000601;NM_001010932,NM_001010932;NM_001010933;NM_001010934;NM_001010931;NM_000601,NM_001010932;NM_001010933;NM_001010934;NM_001010931;NM_000601,NM_001010931;NM_001010932;NM_001010933;NM_001010934;NM_000601,NM_001010931;NM_001010932;NM_001010933;NM_001010934;NM_000601	hypo.chimp
7	83216961	83217040	2	cg11556135,cg11397033	_,_	Island,Island	_,_	_,_	hypo.chimp
7	86434572	86434584	2	cg03360716,cg25955614	Body;Body;TSS1500,Body;Body;TSS1500	_,_	KIAA1324L;KIAA1324L;KIAA1324L,KIAA1324L;KIAA1324L;KIAA1324L	NM_001142749;NR_030672;NM_152748,NM_001142749;NR_030672;NM_152748	hypo.chimp
7	87686079	87686294	3	cg11616676,cg11154552,cg02590886	Body;Body,Body;Body,Body;Body	N_Shore,N_Shore,N_Shore	SRI;SRI,SRI;SRI,SRI;SRI	NM_003130;NM_198901,NM_003130;NM_198901,NM_003130;NM_198901	hypo.chimp
7	91348341	91348383	2	cg16284459,cg01785046	TSS1500,TSS1500	Island,S_Shore	MTERF,MTERF	NM_006980,NM_006980	hypo.chimp
7	94953130	94953168	2	cg21787063,cg19100779	TSS200;TSS200,TSS200;TSS200	_,_	ASB4;ASB4,ASB4;ASB4	NM_145872;NM_016116,NM_145872;NM_016116	hypo.chimp
7	97749874	97750085	2	cg23245481,cg06524039	Body;Body,Body;Body	S_Shore,S_Shore	BRI3;BRI3,BRI3;BRI3	NM_015379;NM_001159491,NM_015379;NM_001159491	hypo.chimp
7	98086815	98087039	4	cg20314490,cg02368096,cg07666532,cg15750986	Body,Body,Body,Body	S_Shore,S_Shore,S_Shore,S_Shore	NPTX2,NPTX2,NPTX2,NPTX2	NM_002523,NM_002523,NM_002523,NM_002523	hypo.chimp
7	98173099	98173386	4	cg02888048,cg06900216,cg25601515,cg26698749	_,_	_,_	_,_	_,_	hypo.chimp
7	98313551	98313745	2	cg20838631,cg05572568	TSS1500,TSS1500	N_Shore,N_Shore	TRRAP,TRRAP	NM_003496,NM_003496	hypo.chimp
7	98905079	98905098	2	cg07241675,cg03476791	_,_	N_Shelf,N_Shelf	_,_	_,_	hypo.chimp
7	99433212	99433594	3	cg22531904,cg14163444,cg14736458	_,_	Island,Island,S_Shore	_,_	_,_	hypo.chimp
7	99604601	99604971	2	cg14392168,cg24616382	TSS1500,TSS1500	N_Shelf,N_Shore	GAL3ST4,GAL3ST4	NM_024637,NM_024637	hypo.chimp
7	99913282	99913338	2	cg13975648,cg05175020	Body,Body	Island,Island	TSC22D4,TSC22D4	NM_030935,NM_030935	hypo.chimp
7	100048484	100048681	3	cg10240853,cg01157261,cg12993791	Body;1stExon;1stExon;Body,Body;Body;Body;Body,Body;Body;Body;Body	Island,Island,S_Shore	MOSPD3;MOSPD3;MOSPD3;MOSPD3,MOSPD3;MOSPD3;MOSPD3;MOSPD3,MOSPD3;MOSPD3;MOSPD3;MOSPD3	NM_001040098;NM_001040099;NM_023948;NM_001040097,NM_001040098;NM_001040099;NM_001040097;NM_023948,NM_001040098;NM_001040099;NM_001040097;NM_023948	hypo.chimp
7	100062493	100062870	2	cg11751434,cg15510373	Body,Body	Island,S_Shore	TFR2,TFR2	NM_003227,NM_003227	hypo.chimp
7	100113998	100114911	2	cg05208895,cg21055462	Body,_	S_Shelf,S_Shelf	GNB2,_	NM_005273,_	hypo.chimp
7	100181019	100181046	2	cg20848291,cg16850897	Body;Body,Body;Body	_,_	ZAN;ZAN,ZAN;ZAN	NM_173059;NM_003386,NM_173059;NM_003386	hypo.chimp
7	100397123	100399595	7	cg03979532,cg19956866,cg03639917,cg25133533,cg13873802,cg20238355,cg03982074	_,TSS1500,TSS1500,TSS200	S_Shore,S_Shore,S_Shore,S_Shore,S_Shore,S_Shelf,S_Shelf	_,MUC12,MUC12,MUC12	_,NM_001164462,NM_001164462,NM_001164462	hypo.chimp
7	100587082	100587456	2	cg24080086,cg07151160	Body,Body	S_Shore,S_Shelf	AP1S1,AP1S1	NM_001283,NM_001283	hypo.chimp
7	101299249	101299651	3	cg15460531,cg19703240,cg14526021	Body;Body;Body,Body;Body;Body,Body;Body;Body	_,_	CUX1;CUX1;CUX1,CUX1;CUX1;CUX1,CUX1;CUX1;CUX1	NM_181500;NM_181552;NM_001913,NM_181500;NM_181552;NM_001913,NM_181500;NM_181552;NM_001913	hypo.chimp
7	101891302	101891812	2	cg03069737,cg07404418	TSS1500;Body,TSS1500;Body	N_Shore,N_Shore	LRWD1;ALKBH4,LRWD1;ALKBH4	NM_152892;NM_017621,NM_152892;NM_017621	hypo.chimp
7	102340529	102340693	5	cg02724472,cg27481555,cg20442697,cg20485874,cg19561297	TSS200;Body;TSS200;Body,5UTR;Body;5UTR;1stExon;1stExon;Body,5UTR;Body;5UTR;1stExon;1stExon;Body,5UTR;Body;5UTR;1stExon;1stExon;Body,5UTR;Body;5UTR;1stExon;1stExon;Body	_,_	LRRC17;FBXL13;LRRC17;FBXL13,LRRC17;FBXL13;LRRC17;LRRC17;LRRC17;FBXL13,LRRC17;FBXL13;LRRC17;LRRC17;LRRC17;FBXL13,LRRC17;FBXL13;LRRC17;LRRC17;LRRC17;FBXL13,LRRC17;FBXL13;LRRC17;LRRC17;LRRC17;FBXL13	NM_005824;NM_145032;NM_001031692;NM_001111038,NM_005824;NM_145032;NM_001031692;NM_005824;NM_001031692;NM_001111038,NM_005824;NM_145032;NM_001031692;NM_005824;NM_001031692;NM_001111038,NM_005824;NM_145032;NM_001031692;NM_005824;NM_001031692;NM_001111038,NM_005824;NM_145032;NM_001031692;NM_005824;NM_001031692;NM_001111038	hypo.chimp
7	123272221	123272288	2	cg00422716,cg08158805	TSS1500,TSS200	_,_	HYAL4,HYAL4	NM_012269,NM_012269	hypo.chimp
7	128364887	128365055	3	cg14349538,cg26616347,cg06630958	TSS1500;TSS1500;TSS1500;TSS1500;TSS1500;TSS1500,TSS1500;TSS1500;TSS1500;TSS1500;TSS1500;TSS1500,TSS200;TSS1500;TSS200;TSS200;TSS200;TSS1500	N_Shore,N_Shore,Island	IRF5;IRF5;IRF5;IRF5;IRF5;IRF5,IRF5;IRF5;IRF5;IRF5;IRF5;IRF5,IRF5;IRF5;IRF5;IRF5;IRF5;IRF5	NM_001098630;NM_032643;NM_001098629;NM_001098628;NM_001098631;NM_002200,NM_001098630;NM_032643;NM_001098629;NM_001098628;NM_001098631;NM_002200,NM_001098630;NM_032643;NM_002200;NM_001098628;NM_001098629;NM_001098631	hypo.chimp
7	128482784	128484219	4	cg11209892,cg24176311,cg04902364,cg21587477	Body;TSS1500,Body;TSS1500,Body;TSS1500,Body	N_Shore,Island,Island,S_Shore	LOC286016;TNPO3,LOC286016;TNPO3,LOC286016;TNPO3,LOC286016	NR_002187;NM_012470,NR_002187;NM_012470,NR_002187;NM_012470,NR_002187	hypo.chimp
7	129211775	129211954	2	cg11627823,cg20218280	_,_	N_Shore,N_Shore	_,_	_,_	hypo.chimp
7	135063389	135063772	6	cg02005755,cg25963505,cg23715104,cg17382310,cg19548649,cg03640993	5UTR;1stExon,TSS200,TSS200,TSS200,TSS200,TSS1500	_,_	SLC13A4;SLC13A4,SLC13A4,SLC13A4,SLC13A4,SLC13A4,SLC13A4	NM_012450;NM_012450,NM_012450,NM_012450,NM_012450,NM_012450,NM_012450
7	135312885	135313514	3	cg23398173,cg21537187,cg22530927	TSS200;TSS200,TSS1500;TSS1500,TSS1500;TSS1500	S_Shore,S_Shore,S_Shore	MTPN;LUZP6,MTPN;LUZP6,MTPN;LUZP6	NM_145808;NM_001128619,NM_145808;NM_001128619,NM_145808;NM_001128619
7	136203628	136203783	3	cg25150440,cg02866106,cg04748704	TSS1500;TSS1500;TSS1500;TSS1500;TSS1500;TSS1500;TSS1500;TSS1500,TSS1500;TSS1500;TSS1500;TSS1500;TSS1500;TSS1500;TSS1500;TSS1500,TSS1500;TSS1500;TSS1500;TSS1500;TSS200;TSS1500;TSS200;TSS1500	N_Shore,N_Shore,N_Shore	CHRM2;CHRM2;CHRM2;CHRM2;CHRM2;CHRM2;CHRM2;CHRM2,CHRM2;CHRM2;CHRM2;CHRM2;CHRM2;CHRM2;CHRM2;CHRM2,CHRM2;CHRM2;CHRM2;CHRM2;CHRM2;CHRM2;CHRM2;CHRM2	NM_001006631;NM_001006627;NM_001006630;NM_001006628;NM_000739;NM_001006626;NM_001006632;NM_001006629,NM_001006631;NM_001006627;NM_001006630;NM_001006628;NM_000739;NM_001006626;NM_001006632;NM_001006629,NM_001006631;NM_001006628;NM_000739;NM_001006626;NM_001006630;NM_001006632;NM_001006627;NM_001006629
7	139575898	139576183	2	cg01003666,cg21056706	_,_	N_Shore,N_Shore	_,_	_,_
7	149894257	149895217	2	cg18342581,cg10777178	TSS1500,TSS200	_,_	GIMAP4,GIMAP4	NM_018326,NM_018326
7	150385014	150385216	2	cg07184237,cg02203833	Body;Body,Body;Body	N_Shore,N_Shore	CDK5;CDK5,CDK5;CDK5	NM_004935;NM_001164410,NM_004935;NM_001164410
7	150386504	150386914	5	cg16218204,cg02328113,cg15879755,cg02723617,cg27384352	TSS1500;TSS1500;TSS1500,TSS1500;TSS1500;TSS1500,TSS1500;TSS1500;TSS1500,TSS1500;TSS1500;TSS1500,TSS1500;TSS1500;TSS1500	N_Shore,N_Shore,N_Shore,N_Shore,N_Shore	CDK5;CDK5;SLC4A2,CDK5;CDK5;SLC4A2,CDK5;CDK5;SLC4A2,CDK5;CDK5;SLC4A2,CDK5;CDK5;SLC4A2	NM_004935;NM_001164410;NM_003040,NM_004935;NM_001164410;NM_003040,NM_004935;NM_001164410;NM_003040,NM_004935;NM_001164410;NM_003040,NM_004935;NM_001164410;NM_003040
7	150389825	150390213	2	cg10842164,cg22168987	5UTR,Body	S_Shore,S_Shore	SLC4A2,SLC4A2	NM_003040,NM_003040	hypo.chimp
7	147667247	147667326	2	cg03892601,cg06730364	Body,Body	N_Shore,N_Shore	CNTNAP2,CNTNAP2	NM_014141,NM_014141	hyper.chimp
7	148612519	148613637	4	cg08280936,cg14570307,cg04109768,cg16322205	Body,Body,Body,Body	N_Shore,Island,Island,S_Shore	ZNF783,ZNF783,ZNF783,ZNF783	NR_015357,NR_015357,NR_015357,NR_015357	hyper.chimp
7	149102817	149102982	2	cg16902863,cg01776278	TSS1500,TSS1500	S_Shore,S_Shore	SSPO,SSPO	NM_198455,NM_198455	hyper.chimp
7	149115731	149115918	2	cg16516272,cg00867835	Body,Body	N_Shelf,N_Shelf	SSPO,SSPO	NM_198455,NM_198455	hyper.chimp
7	149200816	149201061	5	cg19809988,cg12691229,cg23903252,cg06961439,cg09469432	TSS200;TSS200;Body,TSS200;TSS200;Body,TSS200;TSS200;Body,TSS200;TSS200;Body,5UTR;Body;5UTR;1stExon;1stExon	N_Shore,N_Shore,N_Shore,N_Shore,N_Shore	ATP6V0E2;ATP6V0E2;LOC401431,ATP6V0E2;ATP6V0E2;LOC401431,ATP6V0E2;ATP6V0E2;LOC401431,ATP6V0E2;ATP6V0E2;LOC401431,ATP6V0E2;LOC401431;ATP6V0E2;ATP6V0E2;ATP6V0E2	NM_145230;NM_001100592;NR_027040,NM_145230;NM_001100592;NR_027040,NM_145230;NM_001100592;NR_027040,NM_145230;NM_001100592;NR_027040,NM_001100592;NR_027040;NM_145230;NM_145230;NM_001100592	hyper.chimp
7	150129426	150129776	2	cg03964111,cg10409299	TSS200;TSS1500;TSS1500;TSS1500;5UTR,TSS1500;TSS1500;TSS1500;TSS1500;Body	S_Shore,S_Shore	TMEM176B;TMEM176B;TMEM176B;TMEM176B;TMEM176A,TMEM176B;TMEM176B;TMEM176B;TMEM176B;TMEM176A	NM_014020;NM_001101314;NM_001101311;NM_001101312;NM_018487,NM_014020;NM_001101314;NM_001101311;NM_001101312;NM_018487
7	150274848	150275799	6	cg06251500,cg01559770,cg21737698,cg11857646,cg04839131,cg17402325	Body;Body,Body;Body,Body;Body,Body;Body,Body;Body,Body;Body	N_Shore,Island,Island,Island,Island,S_Shore	KCNH2;KCNH2,KCNH2;KCNH2,KCNH2;KCNH2,KCNH2;KCNH2,KCNH2;KCNH2,KCNH2;KCNH2	NM_172057;NM_000238,NM_172057;NM_000238,NM_172057;NM_000238,NM_172057;NM_000238,NM_172057;NM_000238,NM_172057;NM_000238
7	150336805	150337201	3	cg10501602,cg00700487,cg07841866	Body,Body,Body	Island,Island,S_Shore	NOS3,NOS3,NOS3	NM_000603,NM_000603,NM_000603
7	150341380	150342382	4	cg15183092,cg09519327,cg02027878,cg25025646	3UTR;Body,3UTR;Body,3UTR;Body,3UTR;3UTR	Island,Island,Island,S_Shore	ATG9B;NOS3,ATG9B;NOS3,ATG9B;NOS3,NOS3;ATG9B	NM_173681;NM_000603,NM_173681;NM_000603,NM_173681;NM_000603,NM_000603;NM_173681	hyper.chimp
7	150404642	150404933	2	cg06807926,cg18443486	3UTR;3UTR,Body;Body	N_Shelf,N_Shelf	FASTK;FASTK,FASTK;FASTK	NM_006712;NM_033015,NM_033015;NM_006712	hyper.chimp
7	150409657	150410323	11	cg11823624,cg03930004,cg15922246,cg10702041,cg27131953,cg27608032,cg07312641,cg12633680,cg22011804,cg22984132,cg03168922	TSS1500;Body;Body;TSS1500,TSS1500;Body;Body;TSS1500,TSS1500;Body;Body;TSS1500,TSS1500;Body;Body;TSS1500,TSS1500;Body;Body;TSS1500,TSS1500;Body;Body;TSS1500,TSS1500;Body;Body;TSS1500,TSS1500;Body;Body;TSS1500,TSS1500;Body;Body;TSS1500,TSS1500;Body;Body;TSS1500,TSS1500;Body;Body;TSS1500	Island,Island,Island,Island,Island,Island,Island,Island,Island,Island,Island	FASTK;TMUB1;TMUB1;FASTK,FASTK;TMUB1;TMUB1;FASTK,FASTK;TMUB1;TMUB1;FASTK,FASTK;TMUB1;TMUB1;FASTK,FASTK;TMUB1;TMUB1;FASTK,FASTK;TMUB1;TMUB1;FASTK,FASTK;TMUB1;TMUB1;FASTK,FASTK;TMUB1;TMUB1;FASTK,FASTK;TMUB1;TMUB1;FASTK,FASTK;TMUB1;TMUB1;FASTK,FASTK;TMUB1;TMUB1;FASTK	NM_033015;NM_031434;NM_001136044;NM_006712,NM_033015;NM_031434;NM_001136044;NM_006712,NM_033015;NM_031434;NM_001136044;NM_006712,NM_033015;NM_031434;NM_001136044;NM_006712,NM_033015;NM_031434;NM_001136044;NM_006712,NM_033015;NM_031434;NM_001136044;NM_006712,NM_033015;NM_031434;NM_001136044;NM_006712,NM_033015;NM_031434;NM_001136044;NM_006712,NM_033015;NM_031434;NM_001136044;NM_006712,NM_033015;NM_031434;NM_001136044;NM_006712,NM_033015;NM_031434;NM_001136044;NM_006712	hypo.chimp
7	150432690	150432722	2	cg12538435,cg04712895	Body;Body,Body;Body	_,_	AGAP3;AGAP3,AGAP3;AGAP3	NM_001042535;NM_031946,NM_001042535;NM_031946	hyper.chimp
7	150527346	150527382	2	cg02961934,cg06506863	_,_	_,_	_,_	_,_	hypo.chimp
7	150707938	150708834	4	cg19036016,cg22802113,cg21030116,cg02468770	_,_	N_Shore,N_Shore,N_Shore,N_Shore	_,_	_,_	hypo.chimp
7	150788073	150788173	3	cg15935721,cg07748583,cg04567517	_,_	_,_	_,_	_,_	hyper.chimp
7	150848816	150848894	3	cg21134096,cg24531520,cg06603923	TSS1500,TSS1500,TSS1500	Island,S_Shore,S_Shore	RHEB,RHEB,RHEB	NM_005614,NM_005614,NM_005614	hypo.chimp
7	150959049	150959857	2	cg09449988,cg18334211	Body;Body;Body,Body;Body;Body	_,_	PRKAG2;PRKAG2;PRKAG2,PRKAG2;PRKAG2;PRKAG2	NM_016203;NM_001040633;NM_024429,NM_016203;NM_001040633;NM_024429	hyper.chimp
7	151063953	151064259	2	cg10037579,cg01588379	Body;Body,Body;Body	_,_	PRKAG2;PRKAG2,PRKAG2;PRKAG2	NM_016203;NM_001040633,NM_016203;NM_001040633	hyper.chimp
7	151142834	151143631	2	cg09397579,cg26482626	1stExon;5UTR;Body,Body;TSS1500	_,_	PRKAG2;PRKAG2;PRKAG2,PRKAG2;PRKAG2	NM_001040633;NM_001040633;NM_016203,NM_016203;NM_001040633
7	152087512	152087530	2	cg07998951,cg09126741	TSS1500;TSS1500,TSS1500;TSS1500	N_Shore,N_Shore	ACTR3B;ACTR3B,ACTR3B;ACTR3B	NM_020445;NM_001040135,NM_020445;NM_001040135
7	154977092	154977520	3	cg24517467,cg09406004,cg20960833	_,_	Island,Island,S_Shore	_,_	_,_
7	154982733	154983035	2	cg02798848,cg19655177	_,_	_,_	_,_	_,_
7	156125829	156126758	3	cg00292135,cg17170568,cg13258700	Body;TSS1500,TSS200;1stExon;5UTR,TSS1500;5UTR	Island,Island,S_Shore	C7orf13;RNF32,C7orf13;RNF32;RNF32,C7orf13;RNF32	NR_026865;NM_030936,NR_026865;NM_030936;NM_030936,NR_026865;NM_030936
7	156821825	156822191	3	cg23170771,cg14567287,cg12690313	TSS1500;TSS1500,TSS1500;TSS1500,TSS1500;TSS1500	N_Shore,Island,Island	DNAJB6;DNAJB6,DNAJB6;DNAJB6,DNAJB6;DNAJB6	NM_005494;NM_058246,NM_005494;NM_058246,NM_005494;NM_058246
8	206578	206703	3	cg17920646,cg24536782,cg03116837	_,_	Island,Island,Island	_,_	_,_
8	346203	346726	2	cg11995638,cg11898212	TSS1500;TSS1500;TSS1500,TSS200;TSS200;TSS200	N_Shore,Island	FBXO25;FBXO25;FBXO25,FBXO25;FBXO25;FBXO25	NM_183420;NM_012173;NM_183421,NM_183421;NM_183420;NM_012173
8	1100698	1101218	4	cg16922753,cg19530281,cg01788773,cg02640497	_,_	Island,Island,Island,Island	_,_	_,_
8	1636929	1637716	3	cg03591606,cg22763586,cg02690013	Body,3UTR,3UTR	Island,S_Shore,S_Shore	DLGAP2,DLGAP2,DLGAP2	NM_004745,NM_004745,NM_004745
8	1752703	1753688	4	cg25673948,cg11998141,cg18098065,cg01801826	TSS200,TSS200,_	S_Shore,S_Shore,S_Shore,S_Shore	MIR596,MIR596,_	NR_030326,NR_030326,_
8	1776674	1776695	2	cg17458053,cg00783409	5UTR,5UTR	_,_	ARHGEF10,ARHGEF10	NM_014629,NM_014629
8	1980372	1980564	3	cg25541958,cg10452704,cg21547624	TSS200,TSS200,5UTR;1stExon	_,_	MYOM2,MYOM2,MYOM2;MYOM2	NM_003970,NM_003970,NM_003970;NM_003970	hyper.chimp
7	154335990	154337813	6	cg19868468,cg17805068,cg06239616,cg13574820,cg23305129,cg17062938	_,_	N_Shore,N_Shore,Island,Island,S_Shore,S_Shore	_,_	_,_	hypo.chimp
7	154867269	154868101	2	cg10214421,cg12823839	_,_	Island,S_Shore	_,_	_,_	hypo.chimp
7	156478838	156478946	2	cg27576576,cg00943382	_,_	_,_	_,_	_,_	hypo.chimp
7	156764925	156765574	4	cg23704936,cg12837306,cg04936178,cg10349687	_,_	Island,Island,Island,Island	_,_	_,_	hypo.chimp
7	158511993	158512583	2	cg00459992,cg22153799	_,_	S_Shore,N_Shelf	_,_	_,_	hypo.chimp
8	679392	680059	3	cg07249684,cg21198167,cg05269845	_,_	Island,S_Shore,S_Shore	_,_	_,_	hypo.chimp
8	726004	726572	3	cg16584328,cg18196087,cg27627662	_,_	Island,S_Shore,S_Shore	_,_	_,_	hypo.chimp
8	800529	800937	2	cg05973414,cg08123106	_,_	_,_	_,_	_,_	hypo.chimp
8	1391604	1392545	4	cg19722671,cg18167585,cg26864084,cg15305361	_,_	N_Shore,N_Shore,Island,S_Shore	_,_	_,_	hypo.chimp
8	1698453	1698642	2	cg23833896,cg15739309	TSS1500,TSS1500	N_Shore,Island	CLN8,CLN8	NM_018941,NM_018941	hypo.chimp
8	1991217	1991368	3	cg00527552,cg24290751,cg26394687	Body,Body,Body	Island,Island,Island	MYOM2,MYOM2,MYOM2	NM_003970,NM_003970,NM_003970	hypo.chimp
8	3416790	3416888	2	cg11782250,cg15244965	Body,Body	_,_	CSMD1,CSMD1	NM_033225,NM_033225	hypo.chimp
8	6406846	6406978	3	cg20490392,cg25350011,cg04017131	Body;Body;Body;Body,Body;Body;Body;Body,Body;Body;Body;Body	_,_	ANGPT2;ANGPT2;ANGPT2;MCPH1,ANGPT2;ANGPT2;ANGPT2;MCPH1,ANGPT2;ANGPT2;ANGPT2;MCPH1	NM_001118888;NM_001147;NM_001118887;NM_024596,NM_001118888;NM_001147;NM_001118887;NM_024596,NM_001118888;NM_001147;NM_001118887;NM_024596	hypo.chimp
8	6679101	6679289	3	cg07297068,cg24149904,cg21493703	Body,Body,Body	N_Shore,N_Shore,Island	XKR5,XKR5,XKR5	NM_207411,NM_207411,NM_207411	hypo.chimp
8	8617786	8618623	6	cg26100214,cg26708874,cg27095592,cg09820716,cg27044841,cg04654363	_,_	N_Shore,Island,Island,Island,Island,Island	_,_	_,_	hyper.chimp
8	9948892	9948953	2	cg01535726,cg18452600	TSS1500;TSS1500,TSS1500;TSS1500	N_Shore,N_Shore	MSRA;MSRA,MSRA;MSRA	NM_012331;NM_001135670,NM_012331;NM_001135670	hypo.chimp
8	11241292	11241427	3	cg13286698,cg02601489,cg01489256	Body,Body,Body	N_Shore,N_Shore,N_Shore	TDH,TDH,TDH	NR_001578,NR_001578,NR_001578	hypo.chimp
8	11243382	11243419	2	cg03399933,cg03533216	Body,Body	S_Shore,S_Shore	TDH,TDH	NR_001578,NR_001578	hyper.chimp
8	11508099	11509290	5	cg12996100,cg09817024,cg16284953,cg24415728,cg23823894	_,_	N_Shore,S_Shore,S_Shore,S_Shore,S_Shore	_,_	_,_	hypo.chimp
8	11605666	11605765	2	cg17795240,cg26020513	Body,Body	S_Shore,S_Shore	GATA4,GATA4	NM_002052,NM_002052	hyper.chimp
8	11616259	11616422	2	cg16816874,cg03579045	Body,Body	_,_	GATA4,GATA4	NM_002052,NM_002052	hyper.chimp
8	17623774	17624015	2	cg05807467,cg17117049	1stExon;5UTR;Body;5UTR;Body,TSS200;Body;5UTR;Body	_,_	MTUS1;MTUS1;MTUS1;MTUS1;MTUS1,MTUS1;MTUS1;MTUS1;MTUS1	NM_001001931;NM_001001931;NM_001001925;NM_001166393;NM_001001924,NM_001001931;NM_001001925;NM_001166393;NM_001001924
8	18111840	18112050	2	cg15138846,cg21172319	TSS200;TSS200;TSS200;TSS200;TSS200;TSS200;5UTR;TSS200,5UTR;5UTR;5UTR;5UTR;5UTR;5UTR;5UTR;5UTR	_,_	NAT1;NAT1;NAT1;NAT1;NAT1;NAT1;NAT1;NAT1,NAT1;NAT1;NAT1;NAT1;NAT1;NAT1;NAT1;NAT1	NM_001160176;NM_001160175;NM_001160173;NM_000662;NM_001160172;NM_001160171;NM_001160179;NM_001160170,NM_001160171;NM_001160173;NM_001160175;NM_001160170;NM_001160172;NM_001160179;NM_001160176;NM_000662	hyper.chimp
8	18288736	18289567	4	cg24583452,cg24555670,cg23630442,cg15452308	_,_	Island,Island,Island,S_Shore	_,_	_,_	hyper.chimp
8	20203726	20204289	3	cg09772075,cg27655507,cg15631458	_,_	N_Shore,N_Shore,N_Shore	_,_	_,_	hypo.chimp
8	21970470	21971456	2	cg24931658,cg17560136	TSS1500;5UTR;5UTR;5UTR,5UTR;TSS1500;5UTR;5UTR;TSS1500;5UTR	Island,S_Shore	EPB49;EPB49;EPB49;EPB49,EPB49;EPB49;EPB49;EPB49;EPB49;EPB49	NM_001114135;NM_001114136;NM_001114139;NM_001114137,NM_001114135;NM_001978;NM_001114136;NM_001114139;NM_001114138;NM_001114137
8	21972799	21972961	2	cg26392737,cg04662594	1stExon;5UTR;1stExon;5UTR;5UTR;5UTR;5UTR;5UTR,5UTR;5UTR;5UTR;5UTR;5UTR;5UTR	S_Shelf,S_Shelf	EPB49;EPB49;EPB49;EPB49;EPB49;EPB49;EPB49;EPB49,EPB49;EPB49;EPB49;EPB49;EPB49;EPB49	NM_001978;NM_001114136;NM_001114138;NM_001114135;NM_001978;NM_001114138;NM_001114137;NM_001114139,NM_001114135;NM_001114136;NM_001114138;NM_001978;NM_001114139;NM_001114137
8	21980805	21981128	4	cg09562539,cg14746762,cg25985013,cg27315996	Body;Body;Body;Body;Body;Body,Body;Body;Body;Body;Body;Body,Body;Body;Body;Body;Body;Body,Body;Body;Body;Body;Body;Body	S_Shore,S_Shore,S_Shore,S_Shore	EPB49;EPB49;EPB49;EPB49;EPB49;EPB49,EPB49;EPB49;EPB49;EPB49;EPB49;EPB49,EPB49;EPB49;EPB49;EPB49;EPB49;EPB49,EPB49;EPB49;EPB49;EPB49;EPB49;EPB49	NM_001114139;NM_001978;NM_001114135;NM_001114138;NM_001114136;NM_001114137,NM_001114139;NM_001978;NM_001114135;NM_001114138;NM_001114136;NM_001114137,NM_001114139;NM_001978;NM_001114135;NM_001114138;NM_001114136;NM_001114137,NM_001114139;NM_001978;NM_001114135;NM_001114138;NM_001114136;NM_001114137
8	22074025	22074117	2	cg19516009,cg00270259	TSS1500,TSS1500	S_Shelf,S_Shelf	SFTPC,SFTPC	NM_003018,NM_003018
8	22188819	22188937	3	cg21471580,cg02788857,cg18135555	5UTR;1stExon;TSS1500,5UTR;TSS200,5UTR;TSS200	Island,Island,Island	PIWIL2;PIWIL2;PIWIL2,PIWIL2;PIWIL2,PIWIL2;PIWIL2	NM_018068;NM_018068;NM_001135721,NM_018068;NM_001135721,NM_018068;NM_001135721	hyper.chimp
8	22354064	22354185	2	cg13180375,cg16102063	TSS1500,TSS1500	Island,Island	PPP3CC,PPP3CC	NM_005605,NM_005605	hypo.chimp
8	22610772	22611188	2	cg20085265,cg22631350	_,_	S_Shore,S_Shore	_,_	_,_	hyper.chimp
8	22616867	22618414	9	cg12168054,cg26189139,cg17465752,cg10686304,cg26501026,cg03720745,cg01802415,cg22251569,cg10423052	_,_	N_Shore,Island,Island,Island,Island,S_Shore,S_Shore,S_Shore,S_Shore	_,_	_,_	hyper.chimp
8	22791056	22791333	2	cg17836177,cg24494617	Body,Body	_,_	PEBP4,PEBP4	NM_144962,NM_144962	hyper.chimp
8	23201377	23201474	3	cg09364211,cg21551725,cg24842402	TSS200,TSS200,TSS200	N_Shore,N_Shore,Island	R3HCC1,R3HCC1,R3HCC1	NM_001136108,NM_001136108,NM_001136108	hyper.chimp
8	24207417	24207819	3	cg18757155,cg22915945,cg14976447	TSS200;TSS200,1stExon;1stExon;5UTR;5UTR,Body;Body	_,_	ADAM28;ADAM28,ADAM28;ADAM28;ADAM28;ADAM28,ADAM28;ADAM28	NM_014265;NM_021777,NM_021777;NM_014265;NM_014265;NM_021777,NM_021777;NM_014265	hyper.chimp
8	25961728	25962160	2	cg06455149,cg09497201	_,_	Island,S_Shore	_,_	_,_	hypo.chimp
8	27237730	27238039	2	cg23698023,cg00337440	TSS1500;TSS1500;5UTR;5UTR,TSS1500;TSS1500;5UTR;5UTR	N_Shore,N_Shore	PTK2B;PTK2B;PTK2B;PTK2B,PTK2B;PTK2B;PTK2B;PTK2B	NM_173176;NM_173175;NM_004103;NM_173174,NM_173176;NM_173175;NM_004103;NM_173174	hyper.chimp
8	27344217	27344239	2	cg08948225,cg05896926	Body;Body;Body;Body,Body;Body;Body;Body	_,_	PTK2B;PTK2B;PTK2B;PTK2B,PTK2B;PTK2B;PTK2B;PTK2B	NM_173176;NM_173175;NM_173174;NM_004103,NM_173176;NM_173175;NM_173174;NM_004103	hypo.chimp
8	27505633	27506196	2	cg04921824,cg21666367	_,_	N_Shore,S_Shore	_,_	_,_	hypo.chimp
8	27906094	27906238	2	cg13124863,cg16004055	1stExon;5UTR,TSS200	_,_	SCARA5;SCARA5,SCARA5	NM_173833;NM_173833,NM_173833
8	28616386	28616577	4	cg17048233,cg25028855,cg26001764,cg02882487	5UTR,5UTR,5UTR,5UTR	S_Shore,S_Shore,S_Shore,S_Shore	EXTL3,EXTL3,EXTL3,EXTL3	NM_001440,NM_001440,NM_001440,NM_001440
8	29442927	29443552	2	cg21430685,cg13600477	_,_	_,_	_,_	_,_
8	30705380	30705446	2	cg11633204,cg22990888	TSS1500,TSS1500	S_Shore,S_Shore	GSR,GSR	NM_000637,NM_000637
8	30788855	30789802	2	cg09388991,cg26631144	Body;Body,5UTR;1stExon;5UTR;1stExon	N_Shore,Island	PPP2CB;PPP2CB,PPP2CB;PPP2CB;PPP2CB;PPP2CB	NM_004156;NM_001009552,NM_004156;NM_004156;NM_001009552;NM_001009552
8	31011818	31012032	4	cg20786280,cg03438416,cg08494221,cg13969146	TSS1500;5UTR,TSS1500;5UTR,TSS1500;5UTR,TSS1500;5UTR	_,_	PURG;WRN,PURG;WRN,PURG;WRN,PURG;WRN	NM_001015508;NM_000553,NM_001015508;NM_000553,NM_001015508;NM_000553,NM_001015508;NM_000553
8	33460808	33461496	2	cg16456625,cg23663332	TSS1500,TSS1500	N_Shore,N_Shore	MAK16,MAK16	NM_032509,NM_032509
8	37874412	37874713	2	cg03318906,cg14089503	Body;Body,Body;Body	N_Shore,N_Shore	RAB11FIP1;RAB11FIP1,RAB11FIP1;RAB11FIP1	NM_025151;NM_001002814,NM_025151;NM_001002814
8	38441786	38442216	2	cg02043791,cg13278539	5UTR;5UTR;5UTR;5UTR;5UTR;5UTR;5UTR,5UTR;5UTR;5UTR;5UTR;5UTR;5UTR;5UTR	N_Shore,N_Shore	FGFR1;FGFR1;FGFR1;FGFR1;FGFR1;FGFR1;FGFR1,FGFR1;FGFR1;FGFR1;FGFR1;FGFR1;FGFR1;FGFR1	NM_023111;NM_015850;NM_023110;NM_023106;NM_023105;NM_023108;NM_023107,NM_023111;NM_015850;NM_023110;NM_023106;NM_023105;NM_023108;NM_023107
8	38448993	38449897	2	cg17120578,cg18739367	_,_	S_Shelf,_	_,_	_,_
8	38705094	38705340	2	cg14597214,cg15659713	1stExon;5UTR,1stExon;5UTR	_,_	TACC1;TACC1,TACC1;TACC1	NM_001146216;NM_001146216,NM_001146216;NM_001146216
8	39084543	39084649	2	cg03780701,cg16540080	Body,Body	Island,S_Shore	ADAM32,ADAM32	NM_145004,NM_145004
8	41624041	41624150	2	cg10919318,cg25883020	TSS200,TSS200	S_Shore,S_Shore	NKX6-3,NKX6-3	NM_152568,NM_152568
8	42367859	42368084	3	cg17910564,cg03082934,cg17459219	TSS1500;TSS1500,TSS1500;TSS1500,TSS1500;TSS1500	N_Shore,N_Shore,N_Shore	VDAC3;VDAC3,VDAC3;VDAC3,VDAC3;VDAC3	NM_001135694;NM_005662,NM_001135694;NM_005662,NM_001135694;NM_005662
8	43220560	43221625	3	cg23638042,cg04520078,cg04799343	_,_	N_Shore,Island,Island	_,_	_,_
8	47165134	47165266	2	cg09622514,cg23706449	_,_	_,_	_,_	_,_
8	52884355	52884790	6	cg21514857,cg22653915,cg13492337,cg24946253,cg20480642,cg10126372	1stExon,TSS200,TSS200,TSS200,TSS200,TSS1500	_,_	PXDNL,PXDNL,PXDNL,PXDNL,PXDNL,PXDNL	NM_144651,NM_144651,NM_144651,NM_144651,NM_144651,NM_144651
8	53488927	53489475	3	cg11283776,cg14321539,cg02504902	_,_	_,_	_,_	_,_
8	55177400	55177441	2	cg18799069,cg20916578	TSS1500,TSS1500	S_Shore,S_Shore	LYPLA1,LYPLA1	NM_006330,NM_006330
8	55249637	55249953	3	cg11783602,cg06042504,cg20636351	_,_	_,_	_,_	_,_
8	57193378	57193434	2	cg18041277,cg08923114	_,_	Island,Island	_,_	_,_
8	61488506	61488966	3	cg21514735,cg21544713,cg10442355	_,_	_,_	_,_	_,_
8	70567068	70567270	3	cg01225788,cg03613662,cg00541476	5UTR;TSS1500;TSS1500;5UTR,5UTR;TSS1500;TSS1500;5UTR,5UTR;TSS1500;TSS1500;5UTR	_,_	SULF1;SULF1;SULF1;SULF1,SULF1;SULF1;SULF1;SULF1,SULF1;SULF1;SULF1;SULF1	NM_015170;NM_001128206;NM_001128205;NM_001128204,NM_015170;NM_001128206;NM_001128205;NM_001128204,NM_015170;NM_001128206;NM_001128205;NM_001128204
8	71143042	71143899	2	cg18570392,cg19518104	Body,Body	N_Shore,N_Shore	PRDM14,PRDM14	NM_024504,NM_024504
8	74360370	74360764	3	cg10924875,cg17187167,cg00461685	_,_	N_Shore,Island,Island	_,_	_,_
8	78075817	78075876	2	cg01780754,cg00451054	TSS1500;TSS1500,TSS1500;TSS1500	S_Shore,S_Shore	PXMP3;PXMP3,PXMP3;PXMP3	NM_001079867;NM_000318,NM_001079867;NM_000318
8	93143697	93145353	5	cg02473460,cg01851874,cg18457433,cg07120544,cg00045118	Body;Body;5UTR,Body;5UTR;1stExon;5UTR,Body;5UTR;TSS1500,Body;5UTR;TSS1500,Body;5UTR;TSS1500	_,_	RUNX1T1;RUNX1T1;RUNX1T1,RUNX1T1;RUNX1T1;RUNX1T1;RUNX1T1,RUNX1T1;RUNX1T1;RUNX1T1,RUNX1T1;RUNX1T1;RUNX1T1,RUNX1T1;RUNX1T1;RUNX1T1	NM_004349;NM_175634;NM_175635,NM_175634;NM_175635;NM_004349;NM_004349,NM_175634;NM_175635;NM_004349,NM_175634;NM_175635;NM_004349,NM_175634;NM_175635;NM_004349
8	97726248	97727252	5	cg01892689,cg14332120,cg21184172,cg04986675,cg11536940	TSS1500,TSS1500,TSS1500,TSS1500,5UTR	N_Shore,N_Shore,Island,Island,S_Shore	PGCP,PGCP,PGCP,PGCP,PGCP	NM_016134,NM_016134,NM_016134,NM_016134,NM_016134	hypo.chimp
8	32623942	32624507	2	cg05861515,cg11481675	Body;Body;Body;Body;Body;5UTR;Body;Body;Body;Body;Body;Body;Body;1stExon;Body;Body;Body,Body;Body;Body;Body;Body;5UTR;Body;Body;Body;Body;Body;Body;Body;1stExon;Body;Body;Body	_,_	NRG1;NRG1;NRG1;NRG1;NRG1;NRG1;NRG1;NRG1;NRG1;NRG1;NRG1;NRG1;NRG1;NRG1;NRG1;NRG1;NRG1,NRG1;NRG1;NRG1;NRG1;NRG1;NRG1;NRG1;NRG1;NRG1;NRG1;NRG1;NRG1;NRG1;NRG1;NRG1;NRG1;NRG1	NM_013960;NM_001160005;NM_001159995;NM_013957;NM_013956;NM_013959;NM_004495;NM_001159999;NM_013962;NM_001160002;NM_013964;NM_013958;NM_001160008;NM_013959;NM_001160001;NM_001160007;NM_001160004,NM_013960;NM_001160005;NM_001159995;NM_013957;NM_013956;NM_013959;NM_004495;NM_001159999;NM_013962;NM_001160002;NM_013964;NM_013958;NM_001160008;NM_013959;NM_001160001;NM_001160007;NM_001160004	hyper.chimp
8	32904782	32905299	2	cg02143988,cg02617560	_,_	_,_	_,_	_,_	hyper.chimp
8	37724517	37724941	2	cg11496432,cg08247852	Body;Body,TSS1500;Body	_,_	LOC728024;ERLIN2,LOC728024;ERLIN2	NR_003671;NM_007175,NR_003671;NM_007175	hyper.chimp
8	38504965	38505593	3	cg03127563,cg11653466,cg02923831	Body,TSS200,TSS1500	_,_	C8orf86,C8orf86,C8orf86	NM_207412,NM_207412,NM_207412	hyper.chimp
8	38950755	38951885	7	cg18990313,cg12535715,cg16473915,cg15046062,cg27258399,cg04771100,cg00672936	TSS200,1stExon;5UTR,1stExon;5UTR,1stExon,Body,Body,Body	Island,Island,Island,Island,Island,Island,S_Shore	HTRA4,HTRA4;HTRA4,HTRA4;HTRA4,HTRA4,HTRA4,HTRA4,HTRA4	NM_153692,NM_153692;NM_153692,NM_153692;NM_153692,NM_153692,NM_153692,NM_153692,NM_153692	hyper.chimp
8	41286959	41287638	6	cg00000321,cg06166767,cg14824386,cg07935886,cg01074584,cg07122178	TSS1500,TSS1500,TSS1500,TSS1500,TSS1500,TSS1500	S_Shore,S_Shore,S_Shore,S_Shore,S_Shore,S_Shore	SFRP1,SFRP1,SFRP1,SFRP1,SFRP1,SFRP1	NM_003012,NM_003012,NM_003012,NM_003012,NM_003012,NM_003012	hyper.chimp
8	41689779	41689959	2	cg10601625,cg12634208	Body;Body;Body;Body;Body,Body;Body;Body;Body;Body	_,_	ANK1;ANK1;ANK1;ANK1;ANK1,ANK1;ANK1;ANK1;ANK1;ANK1	NM_020476;NM_020475;NM_001142446;NM_020477;NM_000037,NM_020476;NM_020475;NM_001142446;NM_020477;NM_000037	hyper.chimp
8	41852809	41853088	3	cg25052664,cg24800880,cg15333277	Body,Body,Body	Island,Island,S_Shore	ANK1,ANK1,ANK1	NM_001142446,NM_001142446,NM_001142446	hyper.chimp
8	49810132	49810850	3	cg25457832,cg25342894,cg16571825	Body;Body;Body,TSS1500;TSS1500;TSS1500,TSS1500;TSS1500;TSS1500	N_Shore,S_Shore,S_Shore	EFCAB1;EFCAB1;EFCAB1,EFCAB1;EFCAB1;EFCAB1,EFCAB1;EFCAB1;EFCAB1	NM_001142857;NR_024605;NM_024593,NM_001142857;NR_024605;NM_024593,NM_001142857;NR_024605;NM_024593	hyper.chimp
8	49864040	49864895	3	cg26766403,cg27279876,cg09608534	_,_	_,_	_,_	_,_	hyper.chimp
8	54768166	54768341	2	cg03996861,cg05903927	_,_	_,_	_,_	_,_	hyper.chimp
8	55532982	55533922	2	cg11214140,cg15377283	TSS200,Body	Island,Island	SOX17,SOX17	NM_022454,NM_022454	hyper.chimp
8	57014400	57014844	4	cg04132540,cg17643864,cg03388786,cg06248767	5UTR;5UTR,5UTR;5UTR,5UTR;5UTR,5UTR;5UTR	_,_	LYN;LYN,LYN;LYN,LYN;LYN,LYN;LYN	NM_002350;NM_001111097,NM_002350;NM_001111097,NM_002350;NM_001111097,NM_002350;NM_001111097	hyper.chimp
8	57522462	57522546	3	cg27531336,cg09015433,cg23350294	TSS1500;TSS1500,TSS1500;TSS1500,TSS1500;TSS1500	Island,Island,Island	PENK;PENK,PENK;PENK,PENK;PENK	NM_006211;NM_001135690,NM_006211;NM_001135690,NM_006211;NM_001135690	hyper.chimp
8	63776985	63777106	3	cg24340081,cg16998223,cg21047695	Body,Body,Body	_,_	NKAIN3,NKAIN3,NKAIN3	NM_173688,NM_173688,NM_173688	hyper.chimp
8	64161557	64161584	2	cg04163863,cg21461564	TSS1500,TSS1500	S_Shore,S_Shore	TTPA,TTPA	NM_000370,NM_000370	hyper.chimp
8	65653451	65653455	2	cg00405554,cg22884051	TSS1500,TSS1500	N_Shore,N_Shore	LOC401463,LOC401463	NR_015374,NR_015374	hyper.chimp
8	67945421	67945556	2	cg26030713,cg02472291	TSS1500;TSS200;TSS200,1stExon;TSS1500;5UTR;1stExon;5UTR	_,_	C8orf45;C8orf45;C8orf45,C8orf45;C8orf45;C8orf45;C8orf45;C8orf45	NM_001136160;NM_001136161;NM_173518,NM_173518;NM_001136160;NM_001136161;NM_001136161;NM_173518	hyper.chimp
8	71744338	71744342	2	cg05029558,cg27618939	5UTR;TSS1500,5UTR;TSS1500	S_Shore,S_Shore	XKR9;LACTB2,XKR9;LACTB2	NM_001011720;NM_016027,NM_001011720;NM_016027	hyper.chimp
8	73079174	73079701	2	cg24523948,cg00588920	_,_	N_Shore,N_Shore	_,_	_,_	hyper.chimp
8	74445366	74445485	3	cg17118775,cg21550804,cg20982046	_,_	_,_	_,_	_,_	hyper.chimp
8	74822747	74822858	2	cg20646544,cg23686113	TSS1500;TSS1500;TSS1500;TSS1500;TSS1500;TSS1500;TSS1500,TSS1500;TSS1500;TSS1500;TSS1500;TSS1500;TSS1500;TSS1500	S_Shore,S_Shore	STAU2;STAU2;STAU2;STAU2;STAU2;STAU2;STAU2,STAU2;STAU2;STAU2;STAU2;STAU2;STAU2;STAU2	NM_001164381;NM_001164380;NM_001164385;NM_001164382;NM_001164384;NM_014393;NM_001164383,NM_001164381;NM_001164380;NM_001164385;NM_001164382;NM_001164384;NM_014393;NM_001164383	hyper.chimp
8	75425803	75426154	2	cg05501320,cg20546778	Body;5UTR,Body;Body	S_Shore,S_Shore	GDAP1;GDAP1,GDAP1;GDAP1	NM_018972;NM_001040875,NM_018972;NM_001040875
8	92066986	92067161	2	cg00914041,cg17649385	_,_	Island,S_Shore	_,_	_,_
8	94835372	94835522	2	cg23868809,cg08296385	TSS1500;TSS1500;TSS1500,TSS1500;TSS1500;TSS1500	N_Shore,N_Shore	TMEM67;TMEM67;TMEM67,TMEM67;TMEM67;TMEM67	NM_001142301;NR_024522;NM_153704,NM_001142301;NR_024522;NM_153704
8	100055351	100056140	2	cg09059319,cg14968543	_,_	Island,Island	_,_	_,_
8	101417632	101417677	3	cg10334750,cg16450097,cg24450239	_,_	_,_	_,_	_,_
8	101730421	101730709	2	cg14635466,cg25374359	Body,Body	N_Shore,N_Shore	SNX31,SNX31	NM_152628,NM_152628
8	103206349	103206450	2	cg19308132,cg27110054	TSS1500;TSS1500;TSS1500;TSS1500;TSS1500;TSS1500;TSS200,TSS1500;TSS1500;TSS1500;TSS1500;TSS1500;TSS1500;TSS200	S_Shore,S_Shore	NCALD;NCALD;NCALD;NCALD;NCALD;NCALD;NCALD,NCALD;NCALD;NCALD;NCALD;NCALD;NCALD;NCALD	NM_001040627;NM_001040626;NM_001040628;NM_001040624;NM_001040629;NM_001040625;NM_001040630,NM_001040627;NM_001040626;NM_001040628;NM_001040624;NM_001040629;NM_001040625;NM_001040630
8	110727030	110727053	2	cg19571412,cg16891965	5UTR;5UTR;5UTR;TSS200;5UTR;5UTR;TSS200;TSS1500;TSS1500;TSS1500;5UTR;5UTR;5UTR;5UTR,5UTR;5UTR;5UTR;TSS200;5UTR;5UTR;TSS200;TSS1500;TSS1500;TSS1500;5UTR;5UTR;5UTR;5UTR	S_Shore,S_Shore	GOLSYN;GOLSYN;GOLSYN;GOLSYN;GOLSYN;GOLSYN;GOLSYN;GOLSYN;GOLSYN;GOLSYN;GOLSYN;GOLSYN;GOLSYN;GOLSYN,GOLSYN;GOLSYN;GOLSYN;GOLSYN;GOLSYN;GOLSYN;GOLSYN;GOLSYN;GOLSYN;GOLSYN;GOLSYN;GOLSYN;GOLSYN;GOLSYN	NM_001099743;NM_001099749;NM_001099748;NM_001099751;NM_001099745;NM_017786;NM_001099752;NM_001099753;NM_001099754;NM_001099755;NM_001099744;NM_001099746;NM_001099750;NM_001099747,NM_001099743;NM_001099749;NM_001099748;NM_001099751;NM_001099745;NM_017786;NM_001099752;NM_001099753;NM_001099754;NM_001099755;NM_001099744;NM_001099746;NM_001099750;NM_001099747
8	114519523	114520313	4	cg21614735,cg12545721,cg12040201,cg09390350	TSS1500;TSS1500,TSS1500;TSS1500,TSS1500;TSS1500,_	_,_	CSMD3;CSMD3,CSMD3;CSMD3,CSMD3;CSMD3,_	NM_198123;NM_052900,NM_198123;NM_052900,NM_198123;NM_052900,_
8	117847250	117847458	2	cg09305680,cg13005974	TSS1500,TSS1500	N_Shore,N_Shore	UTP23,UTP23	NM_032334,NM_032334
8	118019020	118019425	2	cg08870893,cg21092790	TSS1500,TSS1500	N_Shore,N_Shore	C8orf85,C8orf85	NM_001025357,NM_001025357
8	124124074	124124090	3	cg20684097,cg19987705,cg27121132	TSS1500;TSS1500,TSS1500;TSS1500,TSS1500;TSS1500	S_Shore,S_Shore,S_Shore	DERL1;DERL1,DERL1;DERL1,DERL1;DERL1	NM_001134671;NM_024295,NM_001134671;NM_024295,NM_001134671;NM_024295
8	124286879	124287077	3	cg27053337,cg21215576,cg26820168	Body;Body,Body;Body,Body;Body	N_Shore,N_Shore,N_Shore	FAM83A;FAM83A,FAM83A;FAM83A,FAM83A;FAM83A	NM_032899;NM_207006,NM_032899;NM_207006,NM_032899;NM_207006
8	133273280	133273513	2	cg20650029,cg02609144	Body,Body	_,_	KCNQ3,KCNQ3	NM_004519,NM_004519
8	141590628	141590902	2	cg08877624,cg22610305	1stExon;Body;5UTR,1stExon;Body	Island,Island	CHRAC1;CHRAC1;CHRAC1,CHRAC1;CHRAC1	NM_017444;NR_023360;NM_017444,NM_017444;NR_023360	hyper.chimp
8	105423698	105424231	2	cg08787664,cg02390278	5UTR,5UTR	_,_	TM7SF4,TM7SF4	NM_030788,NM_030788	hypo.chimp
8	105448568	105449161	3	cg23305365,cg07862768,cg20935489	_,_	N_Shore,N_Shore,Island	_,_	_,_	hypo.chimp
8	110443550	110443739	2	cg03012289,cg03668103	TSS1500,TSS200	N_Shore,Island	PKHD1L1,PKHD1L1	NM_177531,NM_177531	hypo.chimp
8	112122315	112122532	2	cg02619464,cg14230692	_,_	_,_	_,_	_,_	hypo.chimp
8	120033811	120033910	3	cg04857420,cg12545993,cg19620294	TSS1500,TSS1500,TSS1500	Island,Island,S_Shore	TNFRSF11B,TNFRSF11B,TNFRSF11B	NM_002546,NM_002546,NM_002546	hypo.chimp
8	134376779	134376910	2	cg17129188,cg20100745	5UTR;5UTR,5UTR;5UTR	N_Shore,N_Shore	NDRG1;NDRG1,NDRG1;NDRG1	NM_001135242;NM_006096,NM_001135242;NM_006096	hypo.chimp
8	141179929	141180262	3	cg00155882,cg22807877,cg08626916	Body;Body,Body;Body,Body;Body	Island,Island,S_Shore	TRAPPC9;TRAPPC9,TRAPPC9;TRAPPC9,TRAPPC9;TRAPPC9	NM_001160372;NM_031466,NM_001160372;NM_031466,NM_001160372;NM_031466	hypo.chimp
8	141317764	141318860	6	cg06900571,cg03918756,cg04404304,cg11152943,cg25229048,cg24388061	Body;Body,Body;Body,Body;Body,Body;Body,Body;Body,Body;Body	_,_	TRAPPC9;TRAPPC9,TRAPPC9;TRAPPC9,TRAPPC9;TRAPPC9,TRAPPC9;TRAPPC9,TRAPPC9;TRAPPC9,TRAPPC9;TRAPPC9	NM_001160372;NM_031466,NM_001160372;NM_031466,NM_001160372;NM_031466,NM_001160372;NM_031466,NM_001160372;NM_031466,NM_001160372;NM_031466	hypo.chimp
8	142163882	142164203	2	cg04497154,cg04124606	_,_	_,_	_,_	_,_	hyper.chimp
8	142587337	142587840	2	cg12034158,cg02122540	TSS1500,TSS1500	_,_	FLJ43860,FLJ43860	NM_207414,NM_207414	hyper.chimp
8	142984556	142984577	2	cg15630458,cg26542567	_,_	S_Shore,S_Shelf	_,_	_,_	hyper.chimp
8	143068094	143068149	2	cg06573787,cg01284666	_,_	_,_	_,_	_,_	hyper.chimp
8	143277350	143277399	2	cg14334488,cg25351599	TSS1500,TSS1500	_,_	NCRNA00051,NCRNA00051	NR_024378,NR_024378	hyper.chimp
8	143542238	143543827	4	cg04134031,cg02478907,cg00713567,cg23189175	TSS200,1stExon,1stExon,Body	N_Shore,Island,Island,S_Shore	BAI1,BAI1,BAI1,BAI1	NM_001702,NM_001702,NM_001702,NM_001702	hyper.chimp
8	143747498	143747547	2	cg09305580,cg04658647	5UTR;5UTR,5UTR;5UTR	N_Shore,N_Shore	JRK;JRK,JRK;JRK	NM_001077527;NM_003724,NM_001077527;NM_003724	hypo.chimp
8	144170857	144171002	2	cg17052170,cg12143168	TSS1500;TSS1500;Body,TSS1500;TSS1500;Body	Island,Island	LY6E;LY6E;LOC100133669,LY6E;LY6E;LOC100133669	NM_001127213;NM_002346;NR_026913,NM_001127213;NM_002346;NR_026913	hypo.chimp
8	144176430	144176634	3	cg03587597,cg16400320,cg12906975	_,_	N_Shore,N_Shore,N_Shore	_,_	_,_	hypo.chimp
8	144192010	144192056	3	cg03058664,cg21015266,cg03029255	TSS200,TSS200,1stExon;5UTR	_,_	C8orf31,C8orf31,C8orf31;C8orf31	NM_173687,NM_173687,NM_173687;NM_173687
8	144438447	144438767	3	cg09076216,cg13283845,cg19657945	_,_	S_Shore,S_Shore,S_Shore	_,_	_,_
8	144523284	144523299	2	cg11988591,cg15118665	Body;TSS1500,Body;TSS1500	S_Shore,S_Shore	RHPN1;C8orf51,RHPN1;C8orf51	NM_052924;NR_026785,NM_052924;NR_026785
8	144720653	144720821	2	cg13462219,cg13399544	Body,Body	Island,Island	C8orf73,C8orf73	NM_001100878,NM_001100878
8	144859754	144860480	4	cg06419093,cg14026325,cg18710908,cg16530595	_,_	Island,Island,Island,Island	_,_	_,_
8	145080098	145080385	3	cg07427475,cg02331830,cg04255391	Body;Body;Body;Body;Body;Body;Body;Body,Body;Body;Body;Body;Body;Body;Body;Body,Body;Body;Body;Body;Body;Body;Body;Body	N_Shore,N_Shore,N_Shore	PLEC1;PLEC1;PLEC1;PLEC1;PLEC1;PLEC1;PLEC1;PLEC1,PLEC1;PLEC1;PLEC1;PLEC1;PLEC1;PLEC1;PLEC1;PLEC1,PLEC1;PLEC1;PLEC1;PLEC1;PLEC1;PLEC1;PLEC1;PLEC1	NM_201378;NM_201384;NM_201382;NM_201381;NM_000445;NM_201380;NM_201383;NM_201379,NM_201378;NM_201384;NM_201382;NM_201381;NM_000445;NM_201380;NM_201383;NM_201379,NM_201378;NM_201384;NM_201382;NM_201381;NM_000445;NM_201380;NM_201383;NM_201379
8	145097047	145097598	2	cg15628518,cg00253228	Body;Body;Body;TSS200,Body;Body;Body;TSS1500	Island,S_Shore	PLEC1;PLEC1;PLEC1;PLEC1,PLEC1;PLEC1;PLEC1;PLEC1	NM_000445;NM_201378;NM_201379;NM_201380,NM_000445;NM_201378;NM_201379;NM_201380
8	145123656	145123783	2	cg00311984,cg14199723	TSS1500;Body,TSS1500;Body	Island,Island	PLEC1;PARP10,PLEC1;PARP10	NM_000445;NM_032789,NM_000445;NM_032789
8	145720695	145721171	3	cg05358723,cg08302650,cg19682134	Body;3UTR,Body;3UTR,3UTR;5UTR	Island,Island,Island	LRRC24;LRRC14,LRRC24;LRRC14,LRRC14;LRRC24	NM_001024678;NM_014665,NM_001024678;NM_014665,NM_014665;NM_001024678
8	145896067	145896898	8	cg00703513,cg20661138,cg15595573,cg17101296,cg01296360,cg11585820,cg09979478,cg03134157	_,_	N_Shore,N_Shore,Island,Island,Island,Island,Island,Island	_,_	_,_
8	145926796	145926832	2	cg06513375,cg21918548	Body,Body	Island,S_Shore	ZNF251,ZNF251	NM_138367,NM_138367
8	145984033	145984596	3	cg05483406,cg08985669,cg02243665	TSS1500,TSS1500,TSS1500	S_Shore,S_Shore,S_Shore	ZNF34,ZNF34,ZNF34	NM_030580,NM_030580,NM_030580
8	146249482	146249599	2	cg13174253,cg04982193	Body,Body	S_Shore,S_Shore	C8orf33,C8orf33	NM_023080,NM_023080
9	980260	981047	3	cg13772514,cg13663644,cg14434922	Body,Body,3UTR	_,_	DMRT3,DMRT3,DMRT3	NM_021240,NM_021240,NM_021240	hypo.chimp
8	144442912	144443154	2	cg02530860,cg11388673	_,_	Island,Island	_,_	_,_	hyper.chimp
8	144533150	144533270	2	cg13074173,cg22914595	Body,Body	Island,Island	RHPN1,RHPN1	NM_052924,NM_052924	hyper.chimp
8	144730770	144731915	6	cg21187068,cg17524265,cg16316162,cg01494348,cg19357499,cg13282195	Body,Body,Body,1stExon,TSS200,TSS1500	N_Shore,Island,Island,Island,Island,S_Shore	NAPRT1,NAPRT1,NAPRT1,NAPRT1,NAPRT1,NAPRT1	NM_145201,NM_145201,NM_145201,NM_145201,NM_145201,NM_145201	hyper.chimp
8	144893629	144894792	5	cg26881677,cg03453469,cg22805436,cg18833573,cg14488605	_,_	N_Shore,N_Shore,Island,Island,Island	_,_	_,_	hyper.chimp
8	144924558	144924861	3	cg03085524,cg03454711,cg04552451	_,_	N_Shore,N_Shore,Island	_,_	_,_	hyper.chimp
8	145024917	145024967	2	cg18153977,cg24337140	_,_	Island,Island	_,_	_,_	hyper.chimp
8	145100245	145100390	2	cg19497517,cg08161931	Body;Body;TSS200,TSS1500;Body;Body	Island,S_Shore	PLEC1;PLEC1;PLEC1,PLEC1;PLEC1;PLEC1	NM_000445;NM_201378;NM_201379,NM_201379;NM_000445;NM_201378	hyper.chimp
8	145176563	145177491	3	cg01193217,cg04594598,cg25223771	_,_	Island,Island,Island	_,_	_,_	hyper.chimp
8	145179000	145179187	2	cg22882523,cg04366687	Body,Body	Island,Island	OPLAH,OPLAH	NM_017570,NM_017570	hyper.chimp
8	145234893	145235124	4	cg07195118,cg26272248,cg14631276,cg06239191	Body,Body,Body,Body	N_Shore,N_Shore,Island,Island	KIAA1875,KIAA1875,KIAA1875,KIAA1875	NR_024207,NR_024207,NR_024207,NR_024207	hyper.chimp
8	145625373	145625443	2	cg01285435,cg05807444	TSS1500;Body;TSS1500,TSS1500;Body;TSS1500	Island,Island	VPS28;NFKBIL2;VPS28,VPS28;NFKBIL2;VPS28	NM_183057;NM_013432;NM_016208,NM_183057;NM_013432;NM_016208	hyper.chimp
8	145718467	145719356	3	cg01099220,cg08872590,cg14739437	3UTR,Body;3UTR,Body;3UTR	Island,Island,Island	LRRC14,LRRC24;LRRC14,LRRC24;LRRC14	NM_014665,NM_001024678;NM_014665,NM_001024678;NM_014665
8	145777081	145777354	2	cg16848524,cg05062087	Body,Body	Island,Island	KIAA1688,KIAA1688	NM_025251,NM_025251
8	145990069	145990916	2	cg19526425,cg01981108	TSS1500,_	S_Shore,S_Shore	RPL8,_	NM_000973,_
8	146248804	146248807	2	cg14844679,cg03332314	Body,Body	Island,Island	C8orf33,C8orf33	NM_023080,NM_023080
9	3171659	3171772	2	cg13416213,cg19327614	_,_	Island,Island	_,_	_,_
9	4652858	4653107	3	cg13696752,cg27204993,cg13763482	Body;1stExon,Body;1stExon,Body;1stExon	Island,Island,S_Shore	C9orf68;PPAPDC2,C9orf68;PPAPDC2,C9orf68;PPAPDC2	NM_001039395;NM_203453,NM_001039395;NM_203453,NM_001039395;NM_203453
9	34799637	34799811	2	cg13740933,cg05137466	_,_	Island,Island	_,_	_,_
9	35655465	35655522	2	cg25826098,cg22880820	TSS200,TSS1500	S_Shore,S_Shore	C9orf100,C9orf100	NM_032818,NM_032818
9	38662315	38662608	2	cg13837857,cg14625731	_,_	_,_	_,_	_,_
9	96441987	96442376	2	cg17814481,cg06705237	5UTR;TSS1500,TSS200;TSS1500	S_Shore,S_Shore	FBP1;FBP1,FBP1;FBP1	NM_001127628;NM_000507,NM_001127628;NM_000507	hyper.chimp
9	36328449	36328497	2	ch.9.691424R,cg13884344	3UTR;3UTR;3UTR;3UTR;3UTR,3UTR;3UTR;3UTR;3UTR;3UTR	_,_	RNF38;RNF38;RNF38;RNF38;RNF38,RNF38;RNF38;RNF38;RNF38;RNF38	NM_194330;NM_194332;NM_022781;NM_194328;NM_194329,NM_194330;NM_194332;NM_022781;NM_194328;NM_194329	hypo.chimp
9	93688495	93688553	2	cg14579957,cg09954631	Body,Body	Island,Island	ROR2,ROR2	NM_004560,NM_004560	hypo.chimp
9	95662932	95663495	3	cg04637727,cg14598338,cg13679303	_,_	Island,Island,S_Shore	_,_	_,_	hypo.chimp
9	97094698	97094704	2	cg02466749,cg14115740	5UTR,5UTR	Island,Island	FANCC,FANCC	NM_000136,NM_000136	hypo.chimp
9	98419853	98420265	2	cg13470160,cg02438545	Body;Body,Body;Body	N_Shore,N_Shore	CDC14B;CDC14B,CDC14B;CDC14B	NM_003671;NM_033331,NM_003671;NM_033331	hypo.chimp
9	99039847	99040285	4	cg14625636,cg13713218,cg19180498,cg25327452	TSS1500,TSS1500,TSS1500,TSS1500	N_Shore,N_Shore,N_Shore,Island	KIAA1529,KIAA1529,KIAA1529,KIAA1529	NM_020893,NM_020893,NM_020893,NM_020893	hyper.chimp
9	99889521	99890212	2	cg19461260,cg11317199	3UTR;3UTR;3UTR;Body,Body;Body;Body;Body	Island,Island	TRIM14;TRIM14;TRIM14;TRIM14,TRIM14;TRIM14;TRIM14;TRIM14	NM_033220;NM_033219;NM_014788;NM_033221,NM_014788;NM_033220;NM_033219;NM_033221
9	122731493	122731671	3	cg21161526,cg04665046,cg14580859	_,_	Island,Island,S_Shore	_,_	_,_
9	126289383	126289570	2	cg14219918,cg01786973	Body,Body	Island,Island	NR5A1,NR5A1	NM_004959,NM_004959
9	126304992	126305169	2	cg02835964,cg13912311	Body,Body	Island,Island	NR5A1,NR5A1	NM_004959,NM_004959
9	129740263	129740897	3	cg14132536,cg23006204,cg00921973	5UTR;1stExon,TSS200,TSS1500	S_Shore,S_Shore,S_Shore	DPM2;DPM2,DPM2,DPM2	NM_003863;NM_003863,NM_003863,NM_003863	hypo.chimp
9	114692645	114692847	2	cg07758904,cg04881348	1stExon,1stExon;5UTR	Island,Island	SLC46A2,SLC46A2;SLC46A2	NM_033051,NM_033051;NM_033051
9	123069693	123069869	3	cg14493637,cg17071957,cg13584244	TSS1500;TSS1500;TSS1500;TSS1500;TSS1500;TSS1500;TSS1500,TSS1500;TSS1500;TSS1500;TSS1500;TSS1500;TSS1500;TSS1500,TSS1500;TSS1500;TSS1500;TSS1500;TSS1500;TSS1500;TSS1500	_,_	GSN;GSN;GSN;GSN;GSN;GSN;GSN,GSN;GSN;GSN;GSN;GSN;GSN;GSN,GSN;GSN;GSN;GSN;GSN;GSN;GSN	NM_001127663;NM_001127667;NM_198252;NM_001127666;NM_001127662;NM_001127665;NM_001127664,NM_001127663;NM_001127667;NM_198252;NM_001127666;NM_001127662;NM_001127665;NM_001127664,NM_001127663;NM_001127667;NM_198252;NM_001127666;NM_001127662;NM_001127665;NM_001127664
9	123537584	123538782	4	cg14416875,cg07949217,cg24015249,cg14594187	Body,Body,Body,Body	N_Shore,N_Shore,Island,Island	DAB2IP,DAB2IP,DAB2IP,DAB2IP	NM_032552,NM_032552,NM_032552,NM_032552
9	124019005	124019895	4	cg14496753,cg01363324,cg14476745,cg01549227	Body;Body,Body;Body,Body;Body,Body;Body	N_Shore,Island,Island,N_Shore	LHX6;LHX6,LHX6;LHX6,LHX6;LHX6,LHX6;LHX6	NM_199160;NM_014368,NM_199160;NM_014368,NM_199160;NM_014368,NM_199160;NM_014368
9	126255490	126255868	4	cg14620572,cg17755352,cg13345318,cg13968218	Body,Body,Body,Body	Island,Island,Island,S_Shore	GPR144,GPR144,GPR144,GPR144	NM_001161808,NM_001161808,NM_001161808,NM_001161808
9	128283731	128284559	2	cg01487409,cg08241360	Body,Body	N_Shore,Island	FAM125B,FAM125B	NM_033446,NM_033446
9	128319366	128319494	2	cg14027891,cg14162086	_,_	S_Shelf,S_Shelf	_,_	_,_
9	130052774	130053144	3	cg08858201,cg12582003,cg14344122	Body;Body,Body;Body,Body;Body	Island,Island,Island	DNM1;DNM1,DNM1;DNM1,DNM1;DNM1	NM_004408;NM_001005336,NM_004408;NM_001005336,NM_004408;NM_001005336
9	132402901	132402916	2	cg13850401,cg07392601	_,_	Island,Island	_,_	_,_
9	132558047	132558509	2	cg14552982,cg14079578	TSS1500,TSS1500	N_Shore,N_Shore	EXOSC2,EXOSC2	NM_014285,NM_014285
9	132990245	132990314	2	cg09553448,cg21213111	TSS1500,TSS1500	N_Shore,N_Shore	NUP214,NUP214	NM_005085,NM_005085
9	134609166	134609321	2	cg14245228,cg14364186	Body,Body	_,_	C9orf98,C9orf98	NM_152572,NM_152572
9	135233369	135233519	2	cg06821107,cg22244122	Body;TSS1500,Body;TSS1500	Island,S_Shore	C9orf96;SURF4,C9orf96;SURF4	NM_153710;NM_033161,NM_153710;NM_033161
9	135313948	135314196	2	cg13413996,cg14110709	Body;Body;Body;TSS1500;TSS1500;Body,Body;TSS1500;3UTR;TSS1500;3UTR;3UTR	N_Shore,N_Shore	ADAMTS13;ADAMTS13;ADAMTS13;C9orf7;C9orf7;ADAMTS13,ADAMTS13;C9orf7;ADAMTS13;C9orf7;ADAMTS13;ADAMTS13	NR_024514;NM_139027;NM_139025;NM_017586;NM_001135775;NM_139026,NR_024514;NM_017586;NM_139027;NM_001135775;NM_139026;NM_139025	hyper.chimp
9	129779659	129780420	2	cg13992008,cg13910681	Body,Body	N_Shelf,N_Shore	FAM102A,FAM102A	NM_001035254,NM_001035254	hypo.chimp
9	130838138	130838398	2	cg14637470,cg00729541	TSS1500,TSS1500	N_Shore,N_Shore	FAM73B,FAM73B	NM_032809,NM_032809	hypo.chimp
9	131122778	131123359	2	cg09975039,cg25073708	TSS1500,5UTR	Island,Island	C9orf106,C9orf106	NM_001012715,NM_001012715
9	131686181	131687170	2	cg00300627,cg13593323	_,_	N_Shore,N_Shore	_,_	_,_
9	132579314	132579475	2	cg10228162,cg14362370	5UTR;1stExon,5UTR;1stExon	S_Shore,S_Shore	ABL1;ABL1,ABL1;ABL1	NM_007313;NM_007313,NM_007313;NM_007313
9	134742942	134743014	2	cg21195491,cg03191962	Body;TSS1500,Body;TSS1500	N_Shore,N_Shore	C9orf98;C9orf9,C9orf98;C9orf9	NM_152572;NM_018956,NM_152572;NM_018956
9	135435246	135435416	2	cg00055726,cg25744056	TSS200,TSS1500	S_Shore,S_Shore	FAM163B,FAM163B	NM_001080515,NM_001080515
9	135436657	135437221	2	cg13814351,cg13692082	TSS1500,_	S_Shelf,N_Shelf	FAM163B,_	NM_001080515,_
9	135716180	135716396	2	cg13928485,cg12747056	Body;Body,Body;Body	N_Shelf,N_Shore	VAV2;VAV2,VAV2;VAV2	NM_001134398;NM_003371,NM_001134398;NM_003371
9	139010739	139010829	2	cg21196488,cg02189785	Body,1stExon;5UTR	S_Shore,S_Shore	CLIC3,CLIC3;CLIC3	NM_004669,NM_004669;NM_004669	hypo.chimp
9	135333664	135333847	3	cg13947653,cg14082398,cg25512587	Body;Body,Body;Body,Body;Body	N_Shore,Island,Island	SLC2A6;SLC2A6,SLC2A6;SLC2A6,SLC2A6;SLC2A6	NM_001145099;NM_017585,NM_001145099;NM_017585,NM_001145099;NM_017585	hyper.chimp
9	135557560	135557966	2	cg13709982,cg27114512	Body;Body,Body;Body	Island,Island	SARDH;SARDH,SARDH;SARDH	NM_001134707;NM_007101,NM_001134707;NM_007101	hyper.chimp
9	137734062	137734128	2	cg00681735,cg21178689	Body,Body	Island,S_Shore	KCNT1,KCNT1	NM_020822,NM_020822	hyper.chimp
9	138127639	138127666	2	cg22747092,cg18768887	TSS1500,TSS1500	Island,Island	NACC2,NACC2	NM_144653,NM_144653	hyper.chimp
9	139091285	139091621	2	cg14006318,cg27336178	TSS1500,TSS200	N_Shore,Island	UAP1L1,UAP1L1	NM_207309,NM_207309	hyper.chimp
9	139237078	139237264	2	cg13825574,cg17457391	TSS1500,_	Island,Island	RNF208,_	NM_031297,_	hyper.chimp
9	139294562	139295040	2	cg02956806,cg14391148	3UTR,3UTR	Island,Island	C9orf167,C9orf167	NM_017723,NM_017723	hypo.chimp
9	139593525	139593696	2	cg12757143,cg13889425	TSS1500,TSS1500	S_Shore,S_Shore	WDR85,WDR85	NM_138778,NM_138778	hypo.chimp
10	449908	449968	2	cg15306863,cg14955916	Body,Body	Island,Island	DIP2C,DIP2C	NM_014974,NM_014974	hypo.chimp
10	527033	527178	2	cg05734675,cg03147470	Body,Body	_,_	DIP2C,DIP2C	NM_014974,NM_014974	hyper.chimp
10	1146212	1146548	2	cg17715243,cg17900199	Body,Body	_,_	WDR37,WDR37	NM_014023,NM_014023	hyper.chimp
10	1558806	1558812	2	cg07308975,cg16706389	Body,Body	_,_	ADARB2,ADARB2	NM_018702,NM_018702	hyper.chimp
10	1641238	1641293	2	cg04513549,cg06403156	Body,Body	_,_	ADARB2,ADARB2	NM_018702,NM_018702	hyper.chimp
10	1680932	1680988	2	cg05407757,cg23375593	Body,Body	_,_	ADARB2,ADARB2	NM_018702,NM_018702	hypo.chimp
10	1771994	1772183	2	cg19964348,cg17572155	_,_	S_Shore,S_Shelf	_,_	_,_	hyper.chimp
10	2954678	2954793	3	cg03734133,cg23612849,cg03549227	_,_	_,_	_,_	_,_	hypo.chimp
10	3225465	3225569	3	cg06107137,cg09577804,cg04778755	_,_	_,_	_,_	_,_	hypo.chimp
10	4183830	4183868	2	cg06183150,cg10503599	_,_	_,_	_,_	_,_	hypo.chimp
10	5774577	5775141	4	cg12506775,cg01476568,cg01126162,cg15704219	5UTR,5UTR,5UTR,5UTR	_,_	C10orf18,C10orf18,C10orf18,C10orf18	NM_017782,NM_017782,NM_017782,NM_017782	hyper.chimp
10	6202733	6202786	2	cg07097725,cg20201177	_,_	_,_	_,_	_,_	hypo.chimp
10	8140569	8140767	2	cg03935183,cg11679455	Body;Body,Body;Body	Island,Island	GATA3;GATA3,GATA3;GATA3	NM_001002295;NM_002051,NM_001002295;NM_002051	hyper.chimp
10	8157032	8157514	3	cg07989490,cg04249642,cg03479211	3UTR;3UTR,_	_,_	GATA3;GATA3,_	NM_002051;NM_001002295,_	hypo.chimp
10	12276839	12277043	2	cg02630694,cg13430851	TSS1500;5UTR,TSS1500;5UTR	N_Shore,N_Shore	CDC123;NUDT5,CDC123;NUDT5	NM_006023;NM_014142,NM_006023;NM_014142	hyper.chimp
10	15451715	15451919	2	cg13905757,cg03120475	Body,Body	N_Shore,N_Shore	FAM171A1,FAM171A1	NM_001010924,NM_001010924	hypo.chimp
10	15802097	15802228	2	cg08361126,cg13492340	TSS1500,TSS1500	Island,S_Shore	ITGA8,ITGA8	NM_003638,NM_003638	hypo.chimp
10	17309649	17310100	4	cg23821329,cg02236650,cg19111999,cg06460869	TSS1500,TSS1500,TSS200,TSS200	N_Shore,N_Shore,N_Shore,N_Shore	VIM,VIM,VIM,VIM	NM_003380,NM_003380,NM_003380,NM_003380	hypo.chimp
10	18589692	18590229	5	cg18959207,cg02635932,cg14357089,cg26576398,cg15720089	1stExon;Body;Body;5UTR;Body;Body;Body;Body,1stExon;Body;Body;5UTR;Body;Body;Body;Body,1stExon;Body;Body;5UTR;Body;Body;Body;Body,1stExon;Body;Body;5UTR;Body;Body;Body;Body,Body;1stExon;Body;Body;Body;Body;Body	_,_	CACNB2;CACNB2;CACNB2;CACNB2;CACNB2;CACNB2;CACNB2;CACNB2,CACNB2;CACNB2;CACNB2;CACNB2;CACNB2;CACNB2;CACNB2;CACNB2,CACNB2;CACNB2;CACNB2;CACNB2;CACNB2;CACNB2;CACNB2;CACNB2,CACNB2;CACNB2;CACNB2;CACNB2;CACNB2;CACNB2;CACNB2;CACNB2,CACNB2;CACNB2;CACNB2;CACNB2;CACNB2;CACNB2;CACNB2	NM_000724;NM_201593;NM_201572;NM_000724;NM_201571;NM_201597;NM_201596;NM_001167945,NM_000724;NM_201593;NM_201572;NM_000724;NM_201571;NM_201597;NM_201596;NM_001167945,NM_000724;NM_201593;NM_201572;NM_000724;NM_201571;NM_201597;NM_201596;NM_001167945,NM_000724;NM_201593;NM_201572;NM_000724;NM_201571;NM_201597;NM_201596;NM_001167945,NM_201571;NM_000724;NM_201593;NM_201597;NM_201572;NM_201596;NM_001167945	hypo.chimp
10	23424053	23424692	2	cg17431739,cg12046168	TSS1500,Body	N_Shore,Island	MSRB2,MSRB2	NM_012228,NM_012228	hyper.chimp
10	29254123	29254197	2	cg15278109,cg22576165	_,_	Island,Island	_,_	_,_	hypo.chimp
10	29932135	29932655	2	cg15856028,cg25426867	5UTR;TSS1500;5UTR,5UTR;TSS1500;5UTR	_,_	SVIL;MIR938;SVIL,SVIL;MIR938;SVIL	NM_021738;NR_030634;NM_003174,NM_021738;NR_030634;NM_003174	hypo.chimp
10	30703432	30703553	3	cg16018729,cg12819931,cg23746239	TSS200,TSS200,TSS200	_,_	LOC729668,LOC729668,LOC729668	NR_003524,NR_003524,NR_003524	hyper.chimp
10	32256037	32256317	4	cg04359828,cg03015672,cg09642378,cg18675610	5UTR,5UTR,5UTR,5UTR	N_Shore,N_Shore,N_Shore,N_Shore	ARHGAP12,ARHGAP12,ARHGAP12,ARHGAP12	NM_018287,NM_018287,NM_018287,NM_018287	hyper.chimp
10	33309618	33309818	3	cg02828768,cg26378680,cg02097843	_,_	Island,Island,Island	_,_	_,_	hyper.chimp
10	33334364	33334783	4	cg09664550,cg25206096,cg23044053,cg07546814	_,_	_,_	_,_	_,_	hyper.chimp
10	34101618	34101711	3	cg25672060,cg02191862,cg08662620	_,_	_,_	_,_	_,_	hyper.chimp
10	42367790	42368671	11	cg26702985,cg19180542,cg14271085,cg27523141,cg17830980,cg12214695,cg08197448,cg02949969,cg17003301,cg09164203,cg27137512	Body,Body,Body,TSS200,TSS200,TSS200,TSS200,TSS200,TSS1500,TSS1500,TSS1500	Island,Island,Island,Island,Island,Island,Island,Island,S_Shore,S_Shore,S_Shore	ZNF37B,ZNF37B,ZNF37B,ZNF37B,ZNF37B,ZNF37B,ZNF37B,ZNF37B,ZNF37B,ZNF37B,ZNF37B	NR_026777,NR_026777,NR_026777,NR_026777,NR_026777,NR_026777,NR_026777,NR_026777,NR_026777,NR_026777,NR_026777	hyper.chimp
10	42583518	42583586	2	cg19318461,cg04923011	_,_	_,_	_,_	_,_	hypo.chimp
10	42681345	42681559	2	cg05248067,cg16279576	_,_	N_Shore,Island	_,_	_,_	hypo.chimp
10	42749309	42749465	2	cg10711775,cg17053251	_,_	Island,Island	_,_	_,_	hyper.chimp
10	43138003	43138917	5	cg23513363,cg14769703,cg02649698,cg15526213,cg10791696	_,_	N_Shore,S_Shore,S_Shore,S_Shore,S_Shore	_,_	_,_	hyper.chimp
10	43177307	43177910	3	cg00377344,cg04766371,cg26255807	_,_	N_Shore,Island,Island	_,_	_,_	hyper.chimp
10	43421726	43421734	2	cg04284122,cg12743727	TSS200,TSS200	N_Shore,N_Shore	ZNF485,ZNF485	NM_145312,NM_145312	hyper.chimp
10	43482787	43483276	4	cg01083633,cg04963514,cg25888561,cg08514530	_,_	N_Shore,Island,Island,Island	_,_	_,_	hyper.chimp
10	44680787	44680886	2	cg03865524,cg10160939	_,_	S_Shore,S_Shore	_,_	_,_	hyper.chimp
10	45410722	45410813	2	cg18980469,cg26476156	TSS1500;TSS1500,TSS1500;TSS1500	S_Shore,S_Shore	MARCH8;MARCH8,MARCH8;MARCH8	NM_001002265;NM_145021,NM_001002265;NM_145021	hypo.chimp
10	45487632	45488557	6	cg18702201,cg20075270,cg23670101,cg02225096,cg22710329,cg07104958	5UTR;5UTR,5UTR;1stExon;1stExon;5UTR,TSS200;TSS200,TSS200;TSS200,TSS200;TSS200,TSS1500;TSS1500	N_Shore,Island,Island,Island,Island,Island	ANUBL1;ANUBL1,ANUBL1;ANUBL1;ANUBL1;ANUBL1,ANUBL1;ANUBL1,ANUBL1;ANUBL1,ANUBL1;ANUBL1,ANUBL1;ANUBL1	NM_174890;NM_001128324,NM_174890;NM_174890;NM_001128324;NM_001128324,NM_001128324;NM_174890,NM_001128324;NM_174890,NM_001128324;NM_174890,NM_001128324;NM_174890	hyper.chimp
10	46391353	46391664	2	cg02616604,cg02632200	TSS1500;TSS1500,TSS1500;TSS1500	Island,S_Shore	SYT15;SYT15,SYT15;SYT15	NM_181519;NM_031912,NM_181519;NM_031912	hypo.chimp
10	46503348	46503638	6	cg17771050,cg04127044,cg25344503,cg02394955,cg25761626,cg06939941	TSS200,TSS200,TSS200,TSS200,TSS200,1stExon;5UTR	Island,Island,Island,Island,Island,Island	PPYR1,PPYR1,PPYR1,PPYR1,PPYR1,PPYR1;PPYR1	NM_005972,NM_005972,NM_005972,NM_005972,NM_005972,NM_005972;NM_005972
10	50491524	50491995	2	cg06737561,cg25207127	TSS1500;5UTR;TSS1500;5UTR;TSS1500;5UTR;TSS1500,TSS200;5UTR;TSS200;5UTR;TSS200;TSS200;5UTR	Island,N_Shore	CHAT;CHAT;CHAT;CHAT;CHAT;CHAT;CHAT,CHAT;CHAT;CHAT;CHAT;CHAT;CHAT;CHAT	NM_020549;NM_020985;NM_001142929;NM_020984;NM_001142934;NM_020986;NM_001142933,NM_001142929;NM_020985;NM_001142933;NM_020984;NM_001142934;NM_020549;NM_020986
10	50645946	50647294	5	cg01365639,cg23570694,cg14156751,cg03202564,cg10882226	_,_	N_Shore,Island,Island,Island,S_Shore	_,_	_,_
10	63479079	63479176	3	cg14789659,cg07520810,cg16401465	Body,Body,Body	_,_	ARID5B,ARID5B,ARID5B	NM_032199,NM_032199,NM_032199
10	64248925	64249065	3	cg22903908,cg20600845,cg01332279	5UTR;1stExon,TSS200,TSS200	S_Shore,S_Shore,S_Shore	EGR2;EGR2,EGR2,EGR2	NM_001136178;NM_001136178,NM_001136178,NM_001136178	hypo.chimp
10	49534606	49534627	2	cg26033293,cg00989323	_,_	Island,S_Shore	_,_	_,_	hyper.chimp
10	49549860	49549920	2	cg07608867,cg04190888	_,_	_,_	_,_	_,_	hyper.chimp
10	50557005	50557218	3	cg05378118,cg16532016,cg14771727	TSS1500;TSS1500,TSS1500;TSS1500,TSS1500;TSS1500	N_Shore,N_Shore,N_Shore	C10orf53;C10orf53,C10orf53;C10orf53,C10orf53;C10orf53	NM_001042427;NM_182554,NM_001042427;NM_182554,NM_001042427;NM_182554	hyper.chimp
10	51234915	51235093	2	cg06860721,cg06682402	TSS200;TSS200;TSS200,TSS200;TSS200;TSS200	N_Shore,Island	NCOA4;NCOA4;NCOA4,NCOA4;NCOA4;NCOA4	NM_001145261;NM_001145263;NM_001145260,NM_001145261;NM_001145263;NM_001145260	hyper.chimp
10	53744530	53745088	5	cg18956393,cg09465786,cg08812555,cg25751172,cg01160882	Body,Body,Body,Body,Body	Island,Island,Island,S_Shore,S_Shore	DKK1,DKK1,DKK1,DKK1,DKK1	NM_012242,NM_012242,NM_012242,NM_012242,NM_012242	hyper.chimp
10	65317098	65317578	2	cg13809095,cg24443446	_,_	_,_	_,_	_,_	hypo.chimp
10	69989651	69989789	3	cg23602092,cg22876739,cg02952701	TSS1500,TSS1500,TSS1500	N_Shore,N_Shore,N_Shore	TET1,TET1,TET1	NM_030625,NM_030625,NM_030625	hyper.chimp
10	71561934	71562793	3	cg18061319,cg25502086,cg01322555	5UTR,5UTR,TSS200	N_Shore,Island,Island	AIFM2,AIFM2,AIFM2	NM_032797,NM_032797,NM_032797	hypo.chimp
10	71835193	71835376	2	cg18721137,cg12565250	Body,Body	S_Shore,S_Shore	EIF4EBP2,EIF4EBP2	NM_004096,NM_004096	hypo.chimp
10	71889757	71889825	2	cg23444264,cg14858616	_,_	S_Shore,S_Shore	_,_	_,_	hypo.chimp
10	71924320	71924329	2	cg25204955,cg01464515	5UTR,5UTR	_,_	KIAA1274,KIAA1274	NM_014431,NM_014431	hyper.chimp
10	72806978	72807014	2	cg06441362,cg25577648	_,_	Island,Island	_,_	_,_	hypo.chimp
10	73149702	73149839	3	cg20390554,cg09637449,cg03456651	5UTR;TSS200;Body,5UTR;TSS200;Body,5UTR;TSS1500;Body	_,_	C10orf105;C10orf105;CDH23,C10orf105;C10orf105;CDH23,C10orf105;C10orf105;CDH23	NM_001168390;NM_001164375;NM_022124,NM_001168390;NM_001164375;NM_022124,NM_001168390;NM_001164375;NM_022124
10	73235446	73235972	5	cg09229668,cg17485681,cg08293528,cg23983208,cg17641566	Body,Body,Body,Body,Body	N_Shore,Island,Island,Island,S_Shore	CDH23,CDH23,CDH23,CDH23,CDH23	NM_022124,NM_022124,NM_022124,NM_022124,NM_022124
10	76243161	76243512	3	cg27102629,cg04359418,cg14906690	_,_	N_Shore,Island,Island	_,_	_,_
10	76530041	76530352	3	cg19591573,cg17292610,cg16221975	Body;TSS1500;Body;3UTR,Body;TSS1500;Body;3UTR,Body;TSS1500;Body;3UTR	_,_	DUSP13;DUSP13;DUSP13;DUSP13,DUSP13;DUSP13;DUSP13;DUSP13,DUSP13;DUSP13;DUSP13;DUSP13	NM_001007273;NM_016364;NM_001007272;NM_001007271,NM_001007273;NM_016364;NM_001007272;NM_001007271,NM_001007273;NM_016364;NM_001007272;NM_001007271	hyper.chimp
10	73704650	73704669	2	cg01839993,cg10592592	Body,Body	Island,Island	DDIT4,DDIT4	NM_019058,NM_019058	hypo.chimp
10	75203145	75203406	3	cg04320760,cg23231163,cg15838173	Body,Body,Body	S_Shore,S_Shore,S_Shore	FUT11,FUT11,FUT11	NM_173540,NM_173540,NM_173540	hypo.chimp
10	77142153	77142164	2	cg20605886,cg24369728	_,_	_,_	_,_	_,_	hyper.chimp
10	77541964	77542294	4	cg24280832,cg04850999,cg26819718,cg05496768	Body,Body,Body,Body	N_Shore,Island,Island,Island	C10orf11,C10orf11,C10orf11,C10orf11	NM_032024,NM_032024,NM_032024,NM_032024	hyper.chimp
10	79140175	79140826	3	cg19094530,cg26248581,cg02775927	_,_	N_Shore,N_Shore,N_Shore	_,_	_,_	hyper.chimp
10	80776718	80776777	2	cg08514558,cg03648155	TSS1500,TSS1500	N_Shore,N_Shore	PPIF,PPIF	NM_005729,NM_005729	hypo.chimp
10	84973281	84973371	2	cg19021428,cg00609367	_,_	_,_	_,_	_,_	hyper.chimp
10	86290380	86290792	4	cg01376839,cg02514686,cg19732605,cg25650076	_,_	Island,Island,Island,Island	_,_	_,_	hyper.chimp
10	88126625	88126929	3	cg12236857,cg08863620,cg26422151	_,_	Island,Island,Island	_,_	_,_	hyper.chimp
10	88418127	88418275	4	cg22715761,cg18286285,cg08300860,cg26338757	TSS1500;TSS200;TSS1500;TSS200;TSS1500;TSS1500,TSS200;TSS200;1stExon;TSS200;5UTR;TSS200;TSS200,TSS200;TSS200;1stExon;TSS200;5UTR;TSS200;TSS200,TSS200;TSS200;1stExon;TSS200;5UTR;TSS200;TSS200	_,_	LDB3;LDB3;LDB3;LDB3;LDB3;LDB3,LDB3;LDB3;LDB3;LDB3;LDB3;LDB3;LDB3,LDB3;LDB3;LDB3;LDB3;LDB3;LDB3;LDB3,LDB3;LDB3;LDB3;LDB3;LDB3;LDB3;LDB3	NM_001080114;NM_001080116;NM_001171611;NM_001171610;NM_001080115;NM_007078,NM_001080115;NM_001080116;NM_001171610;NM_001171611;NM_001171610;NM_001080114;NM_007078,NM_001080115;NM_001080116;NM_001171610;NM_001171611;NM_001171610;NM_001080114;NM_007078,NM_001080115;NM_001080116;NM_001171610;NM_001171611;NM_001171610;NM_001080114;NM_007078
10	88707906	88708373	4	cg05046097,cg23315423,cg03677069,cg21012874	TSS1500;TSS1500,TSS200;TSS1500,1stExon;5UTR;TSS1500,1stExon;5UTR;TSS1500	_,_	MMRN2;SNCG,SNCG;MMRN2,SNCG;SNCG;MMRN2,SNCG;SNCG;MMRN2	NM_024756;NM_003087,NM_003087;NM_024756,NM_003087;NM_003087;NM_024756,NM_003087;NM_003087;NM_024756
10	88717810	88718552	5	cg12261786,cg11805311,cg01754756,cg09573585,cg18602114	TSS1500,TSS200,TSS200,TSS200,Body	N_Shore,Island,Island,Island,Island	C10orf116,C10orf116,C10orf116,C10orf116,C10orf116	NM_006829,NM_006829,NM_006829,NM_006829,NM_006829
10	91141865	91142102	2	cg26974214,cg16395953	TSS1500,TSS200	_,_	IFIT1,IFIT1	NM_001548,NM_001548
10	95316023	95316088	2	cg16671899,cg01488679	TSS1500,TSS1500	N_Shore,N_Shore	GPR120,GPR120	NM_181745,NM_181745
10	95317295	95317644	3	cg05613447,cg15133448,cg08961547	Body,Body,Body	S_Shore,S_Shore,S_Shore	GPR120,GPR120,GPR120	NM_181745,NM_181745,NM_181745
10	95452905	95453114	4	cg06789550,cg20715218,cg20091620,cg07902884	TSS1500,TSS1500,TSS1500,TSS1500	S_Shore,S_Shore,S_Shore,S_Shore	C10orf4,C10orf4,C10orf4,C10orf4	NM_145246,NM_145246,NM_145246,NM_145246
10	97041595	97041603	2	cg11908711,cg25968326	TSS1500,TSS1500	S_Shore,S_Shore	PDLIM1,PDLIM1	NM_020992,NM_020992
10	98936663	98936933	3	cg06569542,cg26164234,cg19478105	TSS1500,TSS1500,TSS1500	S_Shore,S_Shore,S_Shore	SLIT1,SLIT1,SLIT1	NM_003061,NM_003061,NM_003061
10	99150086	99150190	3	cg06359132,cg20016023,cg08345082	Body;Body,Body;Body,Body;Body	N_Shore,N_Shore,N_Shore	RRP12;RRP12,RRP12;RRP12,RRP12;RRP12	NM_001145114;NM_015179,NM_001145114;NM_015179,NM_001145114;NM_015179
10	99175254	99175297	3	cg25603927,cg07151406,cg07221526	TSS1500,TSS1500,TSS1500	N_Shore,N_Shore,N_Shore	PGAM1,PGAM1,PGAM1	NM_002629,NM_002629,NM_002629
10	99333932	99334154	2	cg27428414,cg19023847	TSS200;TSS200,1stExon;5UTR;5UTR;1stExon	_,_	DHDPSL;DHDPSL,DHDPSL;DHDPSL;DHDPSL;DHDPSL	NM_001134670;NM_138413,NM_001134670;NM_001134670;NM_138413;NM_138413
10	99724071	99724144	3	cg11946630,cg07091678,cg19479373	Body,Body,Body	_,_	CRTAC1,CRTAC1,CRTAC1	NM_018058,NM_018058,NM_018058
10	99788385	99788420	3	cg24936799,cg15384383,cg15258447	_,_	_,_	_,_	_,_
10	100164843	100165226	4	cg08397758,cg26618903,cg03852570,cg11185188	1stExon,TSS200,TSS200,TSS1500	_,_	PYROXD2,PYROXD2,PYROXD2,PYROXD2	NM_032709,NM_032709,NM_032709,NM_032709
10	102279875	102280104	2	cg27072683,cg25349900	TSS1500,TSS1500	S_Shore,S_Shore	NDUFB8,NDUFB8	NM_005004,NM_005004
10	102312344	102312684	3	cg20461188,cg23351954,cg15966747	_,_	Island,Island,Island	_,_	_,_
10	102409399	102409554	2	cg07919443,cg00272971	_,_	Island,Island	_,_	_,_
10	102721737	102722155	3	cg01105183,cg15340178,cg23305764	TSS1500,TSS1500,TSS200	S_Shelf,S_Shelf,S_Shelf	SEMA4G,SEMA4G,SEMA4G	NM_017893,NM_017893,NM_017893
10	102750714	102750774	2	cg19499884,cg24760467	5UTR,5UTR	S_Shore,S_Shore	LZTS2,LZTS2	NM_032429,NM_032429
10	102756312	102756448	2	cg19957119,cg18360825	Body,Body	Island,Island	LZTS2,LZTS2	NM_032429,NM_032429
10	102873540	102874077	2	cg02586182,cg26227310	5UTR,5UTR	Island,S_Shore	TLX1NB,TLX1NB	NM_001085398,NM_001085398
10	103060493	103060845	2	cg24472574,cg16819381	_,_	Island,S_Shore	_,_	_,_
10	103316206	103316300	2	cg10081626,cg02072538	_,_	N_Shore,Island	_,_	_,_
10	103578808	103579128	2	cg27387923,cg14789214	Body;Body;Body;Body;Body;Body;Body,Body;Body;Body;Body;Body;Body;Body	N_Shore,Island	KCNIP2;KCNIP2;KCNIP2;KCNIP2;KCNIP2;KCNIP2;KCNIP2,KCNIP2;KCNIP2;KCNIP2;KCNIP2;KCNIP2;KCNIP2;KCNIP2	NM_173195;NM_173191;NM_173193;NM_173194;NM_173192;NM_014591;NM_173197,NM_173195;NM_173191;NM_173193;NM_173194;NM_173192;NM_014591;NM_173197
10	103976235	103976258	2	cg05391011,cg18288462	1stExon;5UTR,1stExon;5UTR	Island,S_Shore	ELOVL3;ELOVL3,ELOVL3;ELOVL3	NM_152310;NM_152310,NM_152310;NM_152310
10	104201286	104201318	3	cg13977486,cg15541611,cg02507296	5UTR;1stExon,TSS200,TSS200	S_Shore,S_Shore,S_Shore	C10orf95;C10orf95,C10orf95,C10orf95	NM_024886;NM_024886,NM_024886,NM_024886	hypo.chimp
10	93795421	93795850	5	cg22800233,cg10530889,cg07028396,cg07571337,cg10403161	_,_	N_Shore,Island,Island,Island,S_Shore	_,_	_,_	hyper.chimp
10	94169789	94170733	5	cg06723904,cg22579265,cg01297808,cg10996327,cg01779383	_,_	N_Shore,Island,Island,Island,Island	_,_	_,_	hyper.chimp
10	94419486	94419510	2	cg00538495,cg15757802	_,_	_,_	_,_	_,_	hyper.chimp
10	95350484	95351376	3	cg06154313,cg24566400,cg12936747	Body,TSS1500,TSS1500	Island,Island,Island	RBP4,RBP4,RBP4	NM_006744,NM_006744,NM_006744	hyper.chimp
10	97505362	97505388	2	cg04451770,cg10381771	TSS1500;TSS200;TSS1500;TSS1500;TSS1500;TSS200;Body,TSS1500;TSS200;TSS1500;TSS1500;TSS1500;TSS200;Body	_,_	ENTPD1;ENTPD1;ENTPD1;ENTPD1;ENTPD1;ENTPD1;ENTPD1,ENTPD1;ENTPD1;ENTPD1;ENTPD1;ENTPD1;ENTPD1;ENTPD1	NM_001164182;NM_001164178;NM_001776;NM_001164183;NM_001164179;NM_001164181;NM_001098175,NM_001164182;NM_001164178;NM_001776;NM_001164183;NM_001164179;NM_001164181;NM_001098175	hyper.chimp
10	97656884	97657234	5	cg13496098,cg13446543,cg17180012,cg25089494,cg11180364	TSS1500,TSS1500,TSS1500,TSS1500,TSS1500	N_Shore,N_Shore,N_Shore,N_Shore,Island	C10orf131,C10orf131,C10orf131,C10orf131,C10orf131	NM_001130446,NM_001130446,NM_001130446,NM_001130446,NM_001130446	hyper.chimp
10	99151099	99151301	2	cg20074007,cg04986413	5UTR;1stExon;1stExon;5UTR,TSS200;TSS200	Island,S_Shore	RRP12;RRP12;RRP12;RRP12,RRP12;RRP12	NM_015179;NM_001145114;NM_015179;NM_001145114,NM_015179;NM_001145114	hyper.chimp
10	102231424	102232124	3	cg05358228,cg04958872,cg04290666	Body,Body,Body	N_Shore,N_Shore,Island	WNT8B,WNT8B,WNT8B	NM_003393,NM_003393,NM_003393	hyper.chimp
10	102579535	102579830	2	cg04436818,cg08823110	3UTR;3UTR;3UTR;3UTR;3UTR,_	N_Shore,N_Shore	PAX2;PAX2;PAX2;PAX2;PAX2,_	NM_003988;NM_000278;NM_003990;NM_003989;NM_003987,_
10	102796861	102796923	2	cg04270401,cg24067118	_,_	N_Shore,N_Shore	_,_	_,_
10	103040310	103040427	2	cg05563662,cg22704845	_,_	N_Shore,N_Shore	_,_	_,_
10	104618949	104619859	3	cg16989281,cg15744005,cg08772003	TSS1500,Body,Body	N_Shore,S_Shore,S_Shore	AS3MT,AS3MT,AS3MT	NM_020682,NM_020682,NM_020682
10	104669458	104670344	3	cg18449062,cg00894378,cg14737131	1stExon;1stExon;1stExon,Body;Body;Body,Body;Body;Body	S_Shore,S_Shore,S_Shore	CNNM2;CNNM2;CNNM2,CNNM2;CNNM2;CNNM2,CNNM2;CNNM2;CNNM2	NM_199077;NM_199076;NM_017649,NM_199077;NM_199076;NM_017649,NM_199077;NM_199076;NM_017649
10	105202046	105202480	5	cg18273501,cg10815165,cg07895149,cg09336982,cg23175074	5UTR;Body;1stExon,TSS200;TSS200,TSS200;TSS200,TSS1500;TSS1500,TSS1500;TSS1500	Island,Island,Island,S_Shore,S_Shore	CALHM2;CALHM2;CALHM2,CALHM2;CALHM2,CALHM2;CALHM2,CALHM2;CALHM2,CALHM2;CALHM2	NM_015916;NR_024552;NM_015916,NM_015916;NR_024552,NM_015916;NR_024552,NR_024552;NM_015916,NR_024552;NM_015916	hyper.chimp
10	104525844	104526042	4	cg15227982,cg25104397,cg14939082,cg27517345	TSS200;Body,5UTR;Body;1stExon,5UTR;Body;1stExon,5UTR;Body;1stExon	_,_	C10orf26;C10orf26,C10orf26;C10orf26;C10orf26,C10orf26;C10orf26;C10orf26,C10orf26;C10orf26;C10orf26	NM_017787;NM_001083913,NM_017787;NM_001083913;NM_017787,NM_017787;NM_001083913;NM_017787,NM_017787;NM_001083913;NM_017787
10	105202610	105202803	3	cg05319515,cg23753748,cg05042708	TSS1500;TSS1500,TSS1500;TSS1500,TSS1500;TSS1500	S_Shore,S_Shore,S_Shore	CALHM2;CALHM2,CALHM2;CALHM2,CALHM2;CALHM2	NR_024552;NM_015916,NR_024552;NM_015916,NR_024552;NM_015916
10	105208761	105208961	2	cg26712428,cg03485533	TSS200,TSS1500	S_Shore,S_Shore	CALHM1,CALHM1	NM_001001412,NM_001001412
10	112394764	112394987	3	cg26725862,cg23362884,cg20639805	Body,Body,Body	S_Shore,S_Shore,S_Shore	RBM20,RBM20,RBM20	NM_001134363,NM_001134363,NM_001134363
10	112620716	112621248	3	cg06431953,cg27408345,cg12191422	TSS200;TSS1500;TSS1500,TSS200;TSS1500;TSS1500,TSS1500;TSS1500;TSS1500	N_Shore,N_Shore,N_Shore	LOC282997;PDCD4;PDCD4,LOC282997;PDCD4;PDCD4,LOC282997;PDCD4;PDCD4	NR_026932;NM_014456;NM_145341,NR_026932;NM_014456;NM_145341,NR_026932;NM_014456;NM_145341
10	115429269	115429273	2	cg10771518,cg03352655	5UTR;TSS200;TSS200;TSS200,5UTR;TSS200;TSS200;TSS200	Island,Island	CASP7;CASP7;CASP7;CASP7,CASP7;CASP7;CASP7;CASP7	NM_033340;NM_033338;NM_001227;NM_033339,NM_033340;NM_033338;NM_001227;NM_033339
10	120344617	120345129	2	cg15748507,cg16196812	Body,5UTR;1stExon	Island,Island	PRLHR,PRLHR;PRLHR	NM_004248,NM_004248;NM_004248	hypo.chimp
10	105410995	105411239	2	cg04388244,cg23985995	Body,Body	Island,S_Shore	SH3PXD2A,SH3PXD2A	NM_014631,NM_014631	hyper.chimp
10	106025121	106025158	2	cg10074506,cg23659134	Body,Body	S_Shore,S_Shore	GSTO2,GSTO2	NM_183239,NM_183239	hyper.chimp
10	106103215	106103260	2	cg18192222,cg05356308	TSS1500,TSS1500	_,_	CCDC147,CCDC147	NM_001008723,NM_001008723	hyper.chimp
10	112434785	112434842	2	cg26292895,cg02747823	Body,Body	_,_	RBM20,RBM20	NM_001134363,NM_001134363	hyper.chimp
10	115850270	115850596	2	cg20703003,cg04526584	_,_	N_Shore,N_Shore	_,_	_,_	hyper.chimp
10	115929014	115929707	4	cg27547703,cg26600802,cg19002907,cg00397764	TSS200,1stExon;5UTR,5UTR,5UTR	Island,Island,S_Shore,S_Shore	TDRD1,TDRD1;TDRD1,TDRD1,TDRD1	NM_198795,NM_198795;NM_198795,NM_198795,NM_198795
10	118755164	118755325	4	cg03449414,cg11079048,cg17136310,cg11772661	TSS200;TSS200,TSS200;TSS200,TSS1500;TSS1500,TSS1500;TSS1500	S_Shore,S_Shore,S_Shore,S_Shore	KIAA1598;KIAA1598,KIAA1598;KIAA1598,KIAA1598;KIAA1598,KIAA1598;KIAA1598	NM_001127211;NM_018330,NM_001127211;NM_018330,NM_018330;NM_001127211,NM_018330;NM_001127211
10	119124772	119125712	3	cg24077454,cg11061177,cg08687958	1stExon;5UTR,1stExon;5UTR,TSS1500	Island,Island,S_Shore	PDZD8;PDZD8,PDZD8;PDZD8,PDZD8	NM_173791;NM_173791,NM_173791;NM_173791,NM_173791
10	119991256	119991292	2	cg22682200,cg12595742	_,_	_,_	_,_	_,_
10	122698888	122699930	4	cg26518861,cg01250603,cg01516005,cg27011456	_,_	Island,S_Shore,S_Shore,S_Shore	_,_	_,_
10	123724879	123725118	2	cg26301297,cg09536375	TSS200;TSS200,TSS1500;TSS1500	S_Shore,S_Shore	NSMCE4A;NSMCE4A,NSMCE4A;NSMCE4A	NM_017615;NM_001167865,NM_001167865;NM_017615
10	123794050	123794065	2	cg09451613,cg26698473	Body;Body,Body;Body	_,_	TACC2;TACC2,TACC2;TACC2	NM_206862;NM_206861,NM_206862;NM_206861
10	123914907	123915533	2	cg14282850,cg15877915	Body;Body;Body;Body,Body;Body;Body;Body	S_Shore,S_Shelf	TACC2;TACC2;TACC2;TACC2,TACC2;TACC2;TACC2;TACC2	NM_206862;NM_006997;NM_206861;NM_206860,NM_206862;NM_006997;NM_206861;NM_206860
10	124629122	124629772	7	cg12474023,cg19634157,cg09019052,cg20072242,cg10241347,cg09533473,cg08779706	TSS200;5UTR;1stExon,Body;TSS200,Body;TSS200,Body;TSS200,Body;TSS200,TSS1500;Body,TSS1500;Body	Island,Island,Island,Island,Island,Island,Island	LOC399815;FAM24B;FAM24B,LOC399815;FAM24B,LOC399815;FAM24B,LOC399815;FAM24B,LOC399815;FAM24B,FAM24B;LOC399815,FAM24B;LOC399815	NR_027282;NM_152644;NM_152644,NR_027282;NM_152644,NR_027282;NM_152644,NR_027282;NM_152644,NR_027282;NM_152644,NM_152644;NR_027282,NM_152644;NR_027282	hyper.chimp
10	123484863	123485001	2	cg09786202,cg15368055	_,_	_,_	_,_	_,_	hypo.chimp
10	123768988	123769352	3	cg07247998,cg04406111,cg04768368	5UTR;5UTR,5UTR;5UTR,5UTR;5UTR	_,_	TACC2;TACC2,TACC2;TACC2,TACC2;TACC2	NM_206862;NM_206861,NM_206862;NM_206861,NM_206862;NM_206861	hypo.chimp
10	124903428	124903436	2	cg04058169,cg23423227	TSS1500;TSS1500,TSS1500;TSS1500	N_Shore,N_Shore	BUB3;BUB3,BUB3;BUB3	NM_004725;NM_001007793,NM_004725;NM_001007793	hyper.chimp
10	125023992	125024808	6	cg01266390,cg18623649,cg14321742,cg03477112,cg07951083,cg18979589	_,_	_,_	_,_	_,_	hyper.chimp
10	126033511	126033539	2	cg19784721,cg18736101	_,_	_,_	_,_	_,_	hyper.chimp
10	126097582	126097600	2	cg03092918,cg03468945	TSS200,TSS200	Island,Island	OAT,OAT	NM_000274,NM_000274	hyper.chimp
10	126175136	126175385	2	cg06817864,cg05720616	Body;Body,Body;Body	_,_	LHPP;LHPP,LHPP;LHPP	NM_022126;NM_001167880,NM_022126;NM_001167880	hypo.chimp
10	126418808	126419257	2	cg26517376,cg23728447	5UTR,5UTR	N_Shelf,N_Shelf	FAM53B,FAM53B	NM_014661,NM_014661	hypo.chimp
10	126782711	126782743	2	cg03576555,cg15970457	5UTR;5UTR,5UTR;5UTR	_,_	CTBP2;CTBP2,CTBP2;CTBP2	NM_001083914;NM_001329,NM_001083914;NM_001329	hyper.chimp
10	127397596	127397669	2	cg19049077,cg26517151	TSS1500,TSS1500	N_Shore,Island	C10orf137,C10orf137	NM_015608,NM_015608	hypo.chimp
10	127574240	127575432	8	cg00267512,cg00770134,cg16889427,cg13175532,cg08472559,cg05292501,cg09487594,cg15383811	TSS1500,TSS1500,TSS1500,TSS200,TSS200,TSS200,1stExon;5UTR,Body	Island,Island,Island,Island,Island,Island,Island,Island	FANK1,FANK1,FANK1,FANK1,FANK1,FANK1,FANK1;FANK1,FANK1	NM_145235,NM_145235,NM_145235,NM_145235,NM_145235,NM_145235,NM_145235;NM_145235,NM_145235
10	128883105	128883177	2	cg23082862,cg25321212	5UTR;Body,5UTR;Body	N_Shore,N_Shore	FAM196A;DOCK1,FAM196A;DOCK1	NM_001039762;NM_001380,NM_001039762;NM_001380
10	129675043	129675054	2	cg16380876,cg07215975	5UTR,5UTR	_,_	PTPRE,PTPRE	NM_006504,NM_006504
10	129838766	129838994	2	cg27576683,cg17401780	_,_	Island,Island	_,_	_,_
10	129898504	129898549	2	cg12487789,cg07998396	_,_	N_Shore,Island	_,_	_,_
10	130436198	130436289	2	cg06733394,cg11045531	_,_	_,_	_,_	_,_
10	131107826	131107885	2	cg23758252,cg08398691	_,_	_,_	_,_	_,_
10	131456938	131457791	2	cg25239156,cg13742952	_,_	_,_	_,_	_,_
10	131559396	131559620	2	cg05636467,cg09252806	Body,Body	S_Shelf,S_Shelf	EBF3,EBF3	NM_001005463,NM_001005463
10	131585084	131585104	2	cg13696436,cg00179795	Body,Body	N_Shore,N_Shore	EBF3,EBF3	NM_001005463,NM_001005463
10	131817335	131817544	3	cg11693285,cg04751558,cg02238549	_,_	Island,Island,S_Shore	_,_	_,_
10	133334910	133334980	2	cg05221664,cg04265961	_,_	_,_	_,_	_,_
10	133646154	133646513	5	cg02886408,cg02388416,cg21762589,cg02835981,cg13599131	TSS1500,TSS1500,TSS1500,TSS1500,TSS1500	Island,Island,Island,Island,Island	BNIP3,BNIP3,BNIP3,BNIP3,BNIP3	NM_004052,NM_004052,NM_004052,NM_004052,NM_004052
10	133996014	133996210	2	cg14039939,cg16259904	1stExon;5UTR;5UTR;5UTR;5UTR,5UTR;5UTR;5UTR;5UTR	Island,S_Shore	LRRC27;LRRC27;LRRC27;LRRC27;LRRC27,LRRC27;LRRC27;LRRC27;LRRC27	NM_001143757;NM_001143757;NM_030626;NM_001143758;NM_001143759,NM_001143757;NM_030626;NM_001143758;NM_001143759
10	134420348	134420369	2	cg25204176,cg23063147	Body,Body	S_Shelf,S_Shelf	INPP5A,INPP5A	NM_005539,NM_005539
10	134449974	134450453	3	cg17259183,cg10171347,cg11342452	TSS1500,TSS1500,TSS1500	Island,Island,Island	NKX6-2,NKX6-2,NKX6-2	NM_177400,NM_177400,NM_177400
10	134455827	134455976	2	cg20515846,cg05950018	_,_	Island,Island	_,_	_,_
10	134894779	134894846	2	cg11464895,cg00646347	Body,Body	Island,Island	UTF1,UTF1	NM_003577,NM_003577
10	134972996	134973057	2	cg07908874,cg19495428	Body;TSS1500,Body;TSS1500	Island,Island	ZNF511;TUBGCP2,ZNF511;TUBGCP2	NM_145806;NM_006659,NM_145806;NM_006659
10	135183795	135184051	4	cg15883382,cg00281977,cg09436743,cg08390786	_,_	Island,Island,Island,Island	_,_	_,_
10	135191518	135193270	9	cg13315147,cg00321709,cg10862468,cg25330361,cg23400446,cg24530264,cg05194426,cg11445109,cg27214960	Body,Body,Body,Body,Body,Body,Body,Body,Body	Island,Island,Island,Island,Island,S_Shore,S_Shore,S_Shore,S_Shore	CYP2E1,CYP2E1,CYP2E1,CYP2E1,CYP2E1,CYP2E1,CYP2E1,CYP2E1,CYP2E1	NM_000773,NM_000773,NM_000773,NM_000773,NM_000773,NM_000773,NM_000773,NM_000773,NM_000773
11	303354	303478	2	cg11694510,cg10552523	TSS1500,TSS1500	S_Shore,N_Shelf	IFITM1,IFITM1	NM_003641,NM_003641
11	305751	306247	2	cg16379091,cg08000731	_,_	Island,Island	_,_	_,_
11	617582	618302	3	cg02218884,cg10730078,cg18714560	TSS1500,TSS1500,TSS1500	Island,Island,S_Shore	SCT,SCT,SCT	NM_021920,NM_021920,NM_021920
11	785582	786434	3	cg22747142,cg02973416,cg13749939	5UTR,5UTR;1stExon,TSS1500	N_Shelf,N_Shore,N_Shore	SLC25A22,SLC25A22;SLC25A22,SLC25A22	NM_024698,NM_024698;NM_024698,NM_024698
11	808466	808903	4	cg20359360,cg14522803,cg24427660,cg18313182	TSS1500,TSS200,TSS200,1stExon;5UTR	N_Shore,N_Shore,N_Shore,N_Shore	PNPLA2,PNPLA2,PNPLA2,PNPLA2;PNPLA2	NM_020376,NM_020376,NM_020376,NM_020376;NM_020376	hypo.chimp
10	127576902	127577243	2	cg02679336,cg10121457	Body,Body	S_Shore,S_Shore	FANK1,FANK1	NM_145235,NM_145235	hyper.chimp
10	130720939	130721152	3	cg14240060,cg12737938,cg26135388	_,_	_,_	_,_	_,_	hyper.chimp
10	131155127	131155686	2	cg14194875,cg02941816	TSS1500,Body	Island,Island	MGMT,MGMT	NM_002412,NM_002412	hyper.chimp
10	133851445	133851718	2	cg19205023,cg10144198	Body,Body	Island,S_Shore	DPYSL4,DPYSL4	NM_006426,NM_006426	hyper.chimp
10	134182373	134182432	2	cg00149455,cg14680921	_,_	_,_	_,_	_,_	hyper.chimp
10	134471935	134472530	3	cg09753644,cg26365014,cg14923370	_,_	N_Shore,N_Shore,Island	_,_	_,_	hyper.chimp
10	134542842	134543087	3	cg17481047,cg17805624,cg14320530	_,_	Island,Island,Island	_,_	_,_	hyper.chimp
10	134640912	134641440	3	cg11194118,cg03753683,cg09784428	_,_	Island,N_Shore,Island	_,_	_,_	hyper.chimp
10	134694433	134694743	3	cg23181554,cg18740429,cg25679864	_,_	Island,Island,Island	_,_	_,_	hyper.chimp
10	134743759	134744038	2	cg10492202,cg18948794	_,_	S_Shore,S_Shore	_,_	_,_	hyper.chimp
10	134910540	134911250	3	cg25154244,cg23400579,cg19348206	_,Body,TSS200	_,_	_,MIR202,MIR202	_,NR_030170,NR_030170	hyper.chimp
10	135190711	135190730	2	cg01465364,cg00436603	TSS200,TSS200	N_Shore,N_Shore	CYP2E1,CYP2E1	NM_000773,NM_000773	hyper.chimp
10	135223637	135224536	3	cg25823128,cg27135915,cg11543126	Body;5UTR;Body,Body;5UTR;Body,Body;5UTR;Body	_,_	SYCE1;SYCE1;SYCE1,SYCE1;SYCE1;SYCE1,SYCE1;SYCE1;SYCE1	NM_001143764;NM_130784;NM_001143763,NM_001143764;NM_130784;NM_001143763,NM_001143764;NM_130784;NM_001143763
11	258923	259468	5	cg02443306,cg13185005,cg10308673,cg11546385,cg02563407	_,_	_,_	_,_	_,_
11	298167	298231	2	cg16187659,cg08843492	5UTR;1stExon,1stExon	N_Shelf,N_Shelf	IFITM2;IFITM2,IFITM2	NM_006435;NM_006435,NM_006435	hyper.chimp
11	309009	309718	2	cg18058077,cg17990365	_,3UTR	Island,S_Shore	_,IFITM3	_,NM_021034
11	358366	358614	6	cg15971656,cg21996245,cg23409699,cg18546477,cg25868831,cg17682432	TSS1500,TSS1500,TSS1500,TSS1500,TSS1500,TSS1500	_,_	B4GALNT4,B4GALNT4,B4GALNT4,B4GALNT4,B4GALNT4,B4GALNT4	NM_178537,NM_178537,NM_178537,NM_178537,NM_178537,NM_178537
11	384199	384289	2	cg08314660,cg18011064	TSS200,1stExon;5UTR	N_Shore,Island	PKP3,PKP3;PKP3	NM_007183,NM_007183;NM_007183	hyper.chimp
11	603632	603792	2	cg16486109,cg17114584	Body;Body;Body,Body;Body;Body	N_Shore,N_Shore	IRF7;IRF7;IRF7,IRF7;IRF7;IRF7	NM_004031;NM_001572;NM_004029,NM_004031;NM_001572;NM_004029	hyper.chimp
11	626167	627038	6	cg23231692,cg14433983,cg06299284,cg08726248,cg23501406,cg15861585	TSS1500,TSS1500,TSS1500,TSS1500,TSS1500,TSS1500	N_Shore,Island,Island,Island,Island,Island	DRD4,DRD4,DRD4,DRD4,DRD4,DRD4	NM_000797,NM_000797,NM_000797,NM_000797,NM_000797,NM_000797	hyper.chimp
11	628404	629423	3	cg03909863,cg05717871,cg03855291	Body,Body,Body	Island,Island,Island	DRD4,DRD4,DRD4	NM_000797,NM_000797,NM_000797	hyper.chimp
11	684704	684717	2	cg16614500,cg19515518	TSS1500;Body;TSS1500,TSS1500;Body;TSS1500	N_Shore,N_Shore	TMEM80;DEAF1;TMEM80,TMEM80;DEAF1;TMEM80	NM_001042463;NM_021008;NM_174940,NM_001042463;NM_021008;NM_174940	hyper.chimp
11	688201	688760	2	cg07161179,cg21191255	Body;Body,Body;Body	S_Shore,S_Shelf	TMEM80;TMEM80,TMEM80;TMEM80	NM_174940;NM_001042463,NM_174940;NM_001042463	hyper.chimp
11	753339	753485	2	cg18089519,cg07199862	Body,Body	_,_	TALDO1,TALDO1	NM_006755,NM_006755	hyper.chimp
11	780177	780795	3	cg14183693,cg11475788,cg09336922	TSS200,TSS1500;3UTR,TSS1500;3UTR	N_Shore,N_Shore,N_Shore	CEND1,CEND1;SLC25A22,CEND1;SLC25A22	NM_016564,NM_016564;NM_024698,NM_016564;NM_024698	hyper.chimp
11	819035	819050	2	cg07535628,cg23600701	Body,Body	N_Shore,N_Shore	EFCAB4A,EFCAB4A	NM_173584,NM_173584	hypo.chimp
11	821584	822357	3	cg12669354,cg22009923,cg03885332	TSS1500;TSS1500;TSS1500;TSS1500;3UTR,TSS1500;TSS1500;TSS1500;TSS1500,TSS1500;TSS1500;TSS1500;TSS1500	Island,Island,Island	CD151;CD151;CD151;CD151;EFCAB4A,CD151;CD151;CD151;CD151,CD151;CD151;CD151;CD151	NM_139030;NM_004357;NM_139029;NM_001039490;NM_173584,NM_139030;NM_004357;NM_139029;NM_001039490,NM_139030;NM_004357;NM_139029;NM_001039490
11	998880	998985	3	cg23699098,cg20764817,cg18550498	Body,Body,Body	N_Shore,N_Shore,N_Shore	AP2A2,AP2A2,AP2A2	NM_012305,NM_012305,NM_012305
11	1420117	1420238	2	cg12186219,cg17429870	Body,Body	N_Shore,N_Shore	BRSK2,BRSK2	NM_003957,NM_003957
11	1978234	1978597	2	cg19177307,cg06982169	_,_	S_Shore,S_Shelf	_,_	_,_
11	2119192	2119506	2	cg20088847,cg24781163	Body;Body;5UTR;TSS1500;Body,Body;Body;5UTR;TSS1500;Body	S_Shore,S_Shore	IGF2AS;INS-IGF2;IGF2;IGF2;IGF2AS,IGF2AS;INS-IGF2;IGF2;IGF2;IGF2AS	NR_028044;NR_003512;NM_001007139;NM_001127598;NR_028043,NR_028044;NR_003512;NM_001007139;NM_001127598;NR_028043
11	2248937	2249881	25	cg02964724,cg27252164,cg20912770,cg05309948,cg15790820,cg06272038,cg10526374,cg13330341,cg14308479,cg07333715,cg01156550,cg21063716,cg26051413,cg13762320,cg11644479,cg05068202,cg20392764,cg04380653,cg07525299,cg12499235,cg24057514,cg06623151,cg09394785,cg04454576,cg10988368	TSS200,TSS200,TSS1500,TSS1500,TSS1500,TSS1500,TSS1500,TSS1500,TSS1500,TSS1500,TSS1500,TSS1500,TSS1500,TSS1500,TSS1500,TSS1500,TSS1500,TSS1500,TSS1500,TSS1500,TSS1500,TSS1500,TSS1500,TSS1500,TSS1500	Island,Island,Island,Island,Island,Island,Island,Island,Island,Island,Island,Island,Island,Island,Island,S_Shore,S_Shore,S_Shore,S_Shore,S_Shore,S_Shore,S_Shore,S_Shore,S_Shore,S_Shore	ASCL2,ASCL2,ASCL2,ASCL2,ASCL2,ASCL2,ASCL2,ASCL2,ASCL2,ASCL2,ASCL2,ASCL2,ASCL2,ASCL2,ASCL2,ASCL2,ASCL2,ASCL2,ASCL2,ASCL2,ASCL2,ASCL2,ASCL2,ASCL2,ASCL2	NM_005170,NM_005170,NM_005170,NM_005170,NM_005170,NM_005170,NM_005170,NM_005170,NM_005170,NM_005170,NM_005170,NM_005170,NM_005170,NM_005170,NM_005170,NM_005170,NM_005170,NM_005170,NM_005170,NM_005170,NM_005170,NM_005170,NM_005170,NM_005170,NM_005170
11	2271621	2271915	2	cg12500951,cg09476073	_,_	_,_	_,_	_,_
11	2279083	2279093	2	cg21027517,cg05509777	Body;TSS1500;Body,Body;TSS1500;Body	_,_	C11orf21;TSPAN32;C11orf21,C11orf21;TSPAN32;C11orf21	NR_024621;NM_139022;NM_001142946,NR_024621;NM_139022;NM_001142946
11	2971055	2971094	2	cg24601835,cg08642707	TSS1500,TSS1500	S_Shore,S_Shore	NAP1L4,NAP1L4	NM_005969,NM_005969
11	3774369	3774425	3	cg09677763,cg24951593,cg19247588	5UTR;TSS1500;5UTR;TSS1500;TSS1500;5UTR;TSS1500;5UTR;TSS1500,5UTR;TSS1500;5UTR;TSS1500;TSS1500;5UTR;TSS1500;5UTR;TSS1500,5UTR;TSS1500;5UTR;TSS1500;TSS1500;5UTR;TSS1500;5UTR;TSS1500	N_Shore,N_Shore,N_Shore	NUP98;PGAP2;NUP98;PGAP2;PGAP2;NUP98;PGAP2;NUP98;PGAP2,NUP98;PGAP2;NUP98;PGAP2;PGAP2;NUP98;PGAP2;NUP98;PGAP2,NUP98;PGAP2;NUP98;PGAP2;PGAP2;NUP98;PGAP2;NUP98;PGAP2	NM_139131;NM_001145439;NM_139132;NR_027015;NM_001145438;NM_005387;NR_027014;NM_016320;NR_027017,NM_139131;NM_001145439;NM_139132;NR_027015;NM_001145438;NM_005387;NR_027014;NM_016320;NR_027017,NM_139131;NM_001145439;NM_139132;NR_027015;NM_001145438;NM_005387;NR_027014;NM_016320;NR_027017
11	4371779	4371821	2	cg07244098,cg09983885	TSS1500,TSS1500	_,_	TRIM21,TRIM21	NM_003141,NM_003141
11	8662157	8662535	3	cg05888947,cg22841667,cg03158561	Body;TSS1500;TSS200,Body;TSS1500;TSS200,Body;TSS1500	S_Shore,S_Shore,S_Shore	RPL27A;SNORA45;SNORA3,RPL27A;SNORA45;SNORA3,RPL27A;SNORA45	NM_000990;NR_002977;NR_002580,NM_000990;NR_002977;NR_002580,NM_000990;NR_002977
11	10486163	10486282	2	cg09761134,cg01522525	_,_	_,_	_,_	_,_
11	14621265	14621567	2	cg18222865,cg03439703	TSS1500;5UTR,TSS1500;5UTR	N_Shore,N_Shore	PDE3B;PSMA1,PDE3B;PSMA1	NM_000922;NM_148976,NM_000922;NM_148976
11	14951137	14951743	7	cg05061471,cg06796866,cg11596897,cg05397812,cg08176386,cg12083965,cg26676559	TSS1500;TSS1500;TSS1500,TSS1500;TSS1500;TSS1500,TSS1500;TSS1500;TSS1500,TSS1500;TSS1500;TSS1500,TSS1500;TSS1500;TSS1500,TSS1500;TSS1500;TSS1500,TSS1500;TSS1500;TSS1500	N_Shore,N_Shore,N_Shore,N_Shore,N_Shore,Island,Island	CALCA;CALCA;CALCA,CALCA;CALCA;CALCA,CALCA;CALCA;CALCA,CALCA;CALCA;CALCA,CALCA;CALCA;CALCA,CALCA;CALCA;CALCA,CALCA;CALCA;CALCA	NM_001741;NM_001033953;NM_001033952,NM_001741;NM_001033953;NM_001033952,NM_001741;NM_001033953;NM_001033952,NM_001741;NM_001033953;NM_001033952,NM_001741;NM_001033953;NM_001033952,NM_001741;NM_001033953;NM_001033952,NM_001741;NM_001033953;NM_001033952
11	18187067	18187597	10	cg26558664,cg10940997,cg02526277,cg09511963,cg12302402,cg05756029,cg13520342,cg15887459,cg05640342,cg01012559	TSS200;TSS200;TSS1500,TSS200;TSS200;TSS1500,TSS200;TSS200;TSS1500,TSS200;TSS200;TSS1500,TSS200;TSS200;TSS1500,Body;TSS200;Body,Body;TSS200;Body,Body;Body;Body,Body;Body;Body,Body;Body;Body	N_Shore,N_Shore,Island,Island,Island,Island,Island,Island,S_Shore,S_Shore	LOC494141;LOC494141;LOC494141,LOC494141;LOC494141;LOC494141,LOC494141;LOC494141;LOC494141,LOC494141;LOC494141;LOC494141,LOC494141;LOC494141;LOC494141,LOC494141;LOC494141;LOC494141,LOC494141;LOC494141;LOC494141,LOC494141;LOC494141;LOC494141,LOC494141;LOC494141;LOC494141,LOC494141;LOC494141;LOC494141	NR_026564;NR_026541;NR_026563,NR_026564;NR_026541;NR_026563,NR_026564;NR_026541;NR_026563,NR_026564;NR_026541;NR_026563,NR_026564;NR_026541;NR_026563,NR_026541;NR_026563;NR_026564,NR_026541;NR_026563;NR_026564,NR_026541;NR_026564;NR_026563,NR_026541;NR_026564;NR_026563,NR_026541;NR_026564;NR_026563
11	18372217	18372456	5	cg19631472,cg15700009,cg02232751,cg09436562,cg03628148	TSS1500;TSS1500;TSS1500;TSS1500;TSS1500,TSS1500;TSS1500;TSS1500;TSS1500;TSS1500,TSS200;TSS200;TSS200;TSS200;TSS200,TSS200;TSS200;TSS200;TSS200;TSS200,TSS200;TSS200;TSS200;TSS200;TSS200	N_Shore,N_Shore,N_Shore,N_Shore,N_Shore	LDHA;LDHA;LDHA;LDHA;LDHA,LDHA;LDHA;LDHA;LDHA;LDHA,LDHA;LDHA;LDHA;LDHA;LDHA,LDHA;LDHA;LDHA;LDHA;LDHA,LDHA;LDHA;LDHA;LDHA;LDHA	NM_005566;NM_001165415;NR_028500;NM_001135239;NM_001165416,NM_005566;NM_001165415;NR_028500;NM_001135239;NM_001165416,NM_001165415;NM_005566;NR_028500;NM_001135239;NM_001165416,NM_001165415;NM_005566;NR_028500;NM_001135239;NM_001165416,NM_001165415;NM_005566;NR_028500;NM_001135239;NM_001165416
11	18390140	18390591	2	cg14332815,cg05740244	TSS1500;TSS1500,5UTR;5UTR	_,_	LDHC;LDHC,LDHC;LDHC	NM_017448;NM_002301,NM_017448;NM_002301
11	18433856	18433955	2	cg14813083,cg18888461	TSS200;TSS200,1stExon;1stExon;5UTR;5UTR	N_Shore,Island	LDHAL6A;LDHAL6A,LDHAL6A;LDHAL6A;LDHAL6A;LDHAL6A	NM_144972;NM_001144071,NM_001144071;NM_144972;NM_144972;NM_001144071
11	18704710	18704743	2	cg16094293,cg01522437	TSS1500,TSS1500	_,_	IGSF22,IGSF22	NM_173588,NM_173588
11	33714989	33716079	5	cg24453664,cg16568681,cg02224369,cg03292992,cg20627971	TSS1500;TSS1500;TSS1500;TSS1500,TSS1500;TSS1500;TSS1500;TSS1500,TSS1500;TSS1500;TSS1500;TSS1500,TSS1500;TSS1500;TSS1500;TSS1500,TSS1500;TSS1500;TSS1500;TSS1500	S_Shore,S_Shore,S_Shore,S_Shore,S_Shore	CD59;CD59;CD59;CD59,CD59;CD59;CD59;CD59,CD59;CD59;CD59;CD59,CD59;CD59;CD59;CD59,CD59;CD59;CD59;CD59	NM_000611;NM_203330;NM_203329;NM_203331,NM_000611;NM_203330;NM_203329;NM_203331,NM_000611;NM_203330;NM_203329;NM_203331,NM_000611;NM_203330;NM_203329;NM_203331,NM_000611;NM_203330;NM_203329;NM_203331
11	36432808	36432848	2	cg14850730,cg08790638	Body;Body;Body;Body,Body;Body;Body;Body	_,_	PRR5L;PRR5L;PRR5L;PRR5L,PRR5L;PRR5L;PRR5L;PRR5L	NM_024841;NM_001160167;NM_001160169;NM_001160168,NM_024841;NM_001160167;NM_001160169;NM_001160168
11	36488858	36488999	2	cg07170183,cg23624321	TSS1500;TSS1500,TSS1500;TSS1500	S_Shore,S_Shore	TRAF6;TRAF6,TRAF6;TRAF6	NM_004620;NM_145803,NM_004620;NM_145803
11	41437934	41438231	4	cg03681834,cg15681577,cg24638253,cg11382417	_,_	_,_	_,_	_,_
11	43247534	43247786	5	cg00233420,cg00258081,cg26999154,cg05920383,cg06013378	_,_	_,_	_,_	_,_
11	43524916	43525498	2	cg09622715,cg15736524	_,_	N_Shore,Island	_,_	_,_
11	43561103	43561845	2	cg17421143,cg01681847	_,_	S_Shore,S_Shelf	_,_	_,_
11	44935572	44935902	2	cg02408252,cg15075597	_,_	Island,S_Shore	_,_	_,_
11	46339138	46339785	4	cg01132064,cg21770622,cg02865822,cg18337963	Body;TSS1500;Body;Body,Body;TSS200;Body;Body,Body;TSS200;Body;Body,1stExon;Body;5UTR;Body;Body	_,_	DGKZ;DGKZ;DGKZ;DGKZ,DGKZ;DGKZ;DGKZ;DGKZ,DGKZ;DGKZ;DGKZ;DGKZ,DGKZ;DGKZ;DGKZ;DGKZ;DGKZ	NM_201533;NM_001105540;NM_003646;NM_201532,NM_201533;NM_001105540;NM_003646;NM_201532,NM_201533;NM_001105540;NM_003646;NM_201532,NM_001105540;NM_201533;NM_001105540;NM_003646;NM_201532	hypo.chimp
11	1287700	1288360	2	cg11259409,cg04699162	Body;TSS1500,Body;TSS1500	Island,S_Shore	LOC255512;TOLLIP,LOC255512;TOLLIP	NR_029409;NM_019009,NR_029409;NM_019009	hyper.chimp
11	1524154	1525563	4	cg27474957,cg19742538,cg06473927,cg02488653	Body,Body,Body,Body	N_Shore,Island,Island,S_Shore	HCCA2,HCCA2,HCCA2,HCCA2	NM_053005,NM_053005,NM_053005,NM_053005	hyper.chimp
11	1848619	1849184	4	cg09989681,cg20331155,cg26868156,cg24024833	5UTR;TSS200;TSS200;Body,5UTR;TSS200;TSS200;Body,5UTR;1stExon;5UTR;Body;1stExon;5UTR,5UTR;5UTR;Body;1stExon;5UTR	Island,Island,Island,S_Shore	LSP1;LSP1;LSP1;LSP1,LSP1;LSP1;LSP1;LSP1,LSP1;LSP1;LSP1;LSP1;LSP1;LSP1,LSP1;LSP1;LSP1;LSP1;LSP1	NM_001013253;NM_001013255;NM_001013254;NM_002339,NM_001013253;NM_001013255;NM_001013254;NM_002339,NM_001013253;NM_001013255;NM_001013254;NM_002339;NM_001013254;NM_001013255,NM_001013253;NM_001013254;NM_002339;NM_001013254;NM_001013255	hyper.chimp
11	1947476	1947641	2	cg14295924,cg21136371	_,_	Island,Island	_,_	_,_	hyper.chimp
11	1976604	1976680	2	cg04817190,cg03996735	TSS1500,TSS1500	S_Shore,S_Shore	H19,H19	NR_002196,NR_002196	hyper.chimp
11	2504858	2504895	2	cg02097203,cg05623526	Body;Body,Body;Body	_,_	KCNQ1;KCNQ1,KCNQ1;KCNQ1	NM_000218;NM_181798,NM_000218;NM_181798	hyper.chimp
11	2511779	2511982	2	cg18729298,cg07824422	Body;Body,Body;Body	N_Shore,Island	KCNQ1;KCNQ1,KCNQ1;KCNQ1	NM_000218;NM_181798,NM_000218;NM_181798	hyper.chimp
11	2678983	2679115	2	cg26963277,cg03654058	TSS1500;Body;Body,TSS1500;Body;Body	S_Shore,S_Shore	KCNQ1OT1;KCNQ1;KCNQ1,KCNQ1OT1;KCNQ1;KCNQ1	NR_002728;NM_000218;NM_181798,NR_002728;NM_000218;NM_181798	hyper.chimp
11	2846178	2847641	34	cg26690742,cg27223805,cg02589685,cg22675922,cg01923099,cg06582202,cg23762359,cg04876474,cg06281297,cg05656180,cg14582642,cg13885561,cg08771706,cg03947814,cg24780501,cg08246619,cg13081704,cg09502866,cg05290058,cg26601317,cg10300188,cg04251368,cg25478600,cg26457809,cg17239974,cg20250981,cg04457979,cg07592963,cg21753226,cg22389375,cg12821804,cg02646491,cg09554951,cg23008562	_,TSS1500,TSS1500,TSS1500,TSS1500,TSS1500,TSS1500,TSS1500,TSS1500,TSS1500,TSS1500,TSS1500,TSS1500,TSS1500,TSS1500,TSS1500,TSS1500,TSS1500,TSS1500,TSS1500,TSS1500,TSS1500,TSS1500,TSS1500,TSS1500,TSS1500,TSS1500,TSS1500,TSS1500,TSS1500,TSS1500,TSS200	N_Shore,N_Shore,N_Shore,N_Shore,N_Shore,N_Shore,N_Shore,N_Shore,N_Shore,N_Shore,N_Shore,Island,Island,Island,Island,Island,Island,Island,Island,Island,Island,Island,Island,Island,Island,Island,Island,Island,Island,Island,Island,Island,Island,Island	_,KCNQ1DN,KCNQ1DN,KCNQ1DN,KCNQ1DN,KCNQ1DN,KCNQ1DN,KCNQ1DN,KCNQ1DN,KCNQ1DN,KCNQ1DN,KCNQ1DN,KCNQ1DN,KCNQ1DN,KCNQ1DN,KCNQ1DN,KCNQ1DN,KCNQ1DN,KCNQ1DN,KCNQ1DN,KCNQ1DN,KCNQ1DN,KCNQ1DN,KCNQ1DN,KCNQ1DN,KCNQ1DN,KCNQ1DN,KCNQ1DN,KCNQ1DN,KCNQ1DN,KCNQ1DN,KCNQ1DN	_,NR_024627,NR_024627,NR_024627,NR_024627,NR_024627,NR_024627,NR_024627,NR_024627,NR_024627,NR_024627,NR_024627,NR_024627,NR_024627,NR_024627,NR_024627,NR_024627,NR_024627,NR_024627,NR_024627,NR_024627,NR_024627,NR_024627,NR_024627,NR_024627,NR_024627,NR_024627,NR_024627,NR_024627,NR_024627,NR_024627,NR_024627	hyper.chimp
11	3143847	3144499	2	cg06131936,cg12537619	TSS1500;TSS1500;TSS1500,TSS1500;TSS1500;TSS1500	S_Shore,S_Shore	OSBPL5;OSBPL5;OSBPL5,OSBPL5;OSBPL5;OSBPL5	NM_001144063;NM_020896;NM_145638,NM_001144063;NM_020896;NM_145638	hyper.chimp
11	5786606	5786738	3	cg12884422,cg03334473,cg11076663	_,_	_,_	_,_	_,_	hyper.chimp
11	6903929	6904128	4	cg04053776,cg02595681,cg14883916,cg12728517	TSS1500,TSS1500,TSS200,TSS200	N_Shore,N_Shore,Island,Island	ZNF215,ZNF215,ZNF215,ZNF215	NM_013250,NM_013250,NM_013250,NM_013250	hyper.chimp
11	6997770	6998563	12	cg04997812,cg05883874,cg12471986,cg08558873,cg21873011,cg22867063,cg11679142,cg09371047,cg11838299,cg17228942,cg15125684,cg07655598	5UTR;TSS1500,5UTR;TSS1500,5UTR;TSS1500;1stExon,5UTR;TSS1500;1stExon,5UTR;TSS200;1stExon,5UTR;TSS200;1stExon,TSS200;TSS200,TSS200;TSS200,1stExon;TSS200;5UTR,1stExon;TSS1500;5UTR,1stExon;TSS1500;5UTR,1stExon;TSS1500;5UTR	Island,Island,Island,Island,Island,Island,Island,Island,Island,Island,Island,S_Shore	ZNF214;NLRP14,ZNF214;NLRP14,ZNF214;NLRP14;ZNF214,ZNF214;NLRP14;ZNF214,ZNF214;NLRP14;ZNF214,ZNF214;NLRP14;ZNF214,ZNF214;NLRP14,ZNF214;NLRP14,NLRP14;ZNF214;NLRP14,NLRP14;ZNF214;NLRP14,NLRP14;ZNF214;NLRP14,NLRP14;ZNF214;NLRP14	NM_013249;NM_176822,NM_013249;NM_176822,NM_013249;NM_176822;NM_013249,NM_013249;NM_176822;NM_013249,NM_013249;NM_176822;NM_013249,NM_013249;NM_176822;NM_013249,NM_013249;NM_176822,NM_013249;NM_176822,NM_176822;NM_013249;NM_176822,NM_176822;NM_013249;NM_176822,NM_176822;NM_013249;NM_176822,NM_176822;NM_013249;NM_176822	hyper.chimp
11	7964930	7965024	3	cg14751503,cg26260789,cg10693065	TSS1500,TSS1500,TSS1500	N_Shore,N_Shore,N_Shore	EIF3F,EIF3F,EIF3F	NM_003754,NM_003754,NM_003754	hyper.chimp
11	8571932	8572748	2	cg26668837,cg00961418	1stExon;5UTR,TSS1500	N_Shore,S_Shore	STK33;STK33,STK33	NM_030906;NM_030906,NM_030906
11	8789483	8789671	3	cg13736131,cg17213154,cg22989033	TSS1500;TSS200;5UTR,TSS1500;TSS200;5UTR,TSS1500;TSS1500;5UTR	_,_	ST5;ST5;ST5,ST5;ST5;ST5,ST5;ST5;ST5	NM_213618;NM_139157;NM_005418,NM_213618;NM_139157;NM_005418,NM_139157;NM_213618;NM_005418	hyper.chimp
11	9068790	9069047	2	cg24733126,cg01081263	Body;Body,Body;Body	N_Shore,Island	SCUBE2;SCUBE2,SCUBE2;SCUBE2	NM_020974;NM_001170690,NM_020974;NM_001170690	hyper.chimp
11	9342414	9343027	2	cg14296990,cg13070366	_,_	Island,S_Shore	_,_	_,_	hyper.chimp
11	14950774	14950806	2	cg12904004,cg13491234	TSS1500;TSS1500;TSS1500,TSS1500;TSS1500;TSS1500	N_Shore,N_Shore	CALCA;CALCA;CALCA,CALCA;CALCA;CALCA	NM_001741;NM_001033953;NM_001033952,NM_001741;NM_001033953;NM_001033952	hyper.chimp
11	15919508	15919743	4	cg07805777,cg03662997,cg05565400,cg20446948	_,_	Island,Island,Island,Island	_,_	_,_	hyper.chimp
11	17717150	17717178	2	cg09557556,cg25033364	Body;Body,Body;Body	S_Shelf,S_Shelf	KCNC1;KCNC1,KCNC1;KCNC1	NM_004976;NM_001112741,NM_004976;NM_001112741	hyper.chimp
11	26972095	26972384	4	cg10418755,cg02565993,cg07042914,cg07777008	TSS200,TSS200,5UTR;1stExon,5UTR;1stExon	_,_	FIBIN,FIBIN,FIBIN;FIBIN,FIBIN;FIBIN	NM_203371,NM_203371,NM_203371;NM_203371,NM_203371;NM_203371	hyper.chimp
11	32378211	32378421	3	cg24325551,cg20449659,cg08575722	Body;Body;Body;Body,Body;Body;Body;Body,Body;Body;Body;Body	_,_	WT1;WT1;WT1;WT1,WT1;WT1;WT1;WT1,WT1;WT1;WT1;WT1	NM_024425;NM_024426;NM_000378;NM_024424,NM_024425;NM_024426;NM_000378;NM_024424,NM_024425;NM_024426;NM_000378;NM_024424	hyper.chimp
11	35639997	35640127	2	cg02760962,cg23681730	TSS1500,TSS1500	N_Shore,N_Shore	TRIM44,TRIM44	NM_017583,NM_017583	hyper.chimp
11	43501076	43501360	2	cg24568548,cg04904059	_,_	S_Shore,S_Shore	_,_	_,_	hyper.chimp
11	45349305	45349349	2	cg11656177,cg24530812	_,_	_,_	_,_	_,_	hyper.chimp
11	45700199	45700347	3	cg01299768,cg16950627,cg16598420	_,_	_,_	_,_	_,_	hyper.chimp
11	45701499	45701548	2	cg20786730,cg15803018	_,_	_,_	_,_	_,_	hyper.chimp
11	45824974	45825077	2	cg15812322,cg07524456	TSS1500;TSS1500,TSS1500;TSS200	N_Shore,N_Shore	CRY2;CRY2,CRY2;CRY2	NM_021117;NM_001127457,NM_021117;NM_001127457	hyper.chimp
11	46216810	46217784	2	cg17144547,cg22789714	_,_	N_Shore,S_Shore	_,_	_,_	hyper.chimp
11	46357998	46358023	2	cg11436767,cg07052627	TSS1500;Body;Body;Body;Body,TSS1500;Body;Body;Body;Body	N_Shore,N_Shore	MDK;DGKZ;DGKZ;DGKZ;DGKZ,MDK;DGKZ;DGKZ;DGKZ;DGKZ	NM_001012334;NM_001105540;NM_201533;NM_003646;NM_201532,NM_001012334;NM_001105540;NM_201533;NM_003646;NM_201532	hypo.chimp
11	46914649	46914667	2	cg07104919,cg24347903	TSS200;TSS200;TSS200;TSS200,TSS200;TSS200;TSS200;TSS200	N_Shore,N_Shore	C11orf49;C11orf49;C11orf49;C11orf49,C11orf49;C11orf49;C11orf49;C11orf49	NM_001003676;NM_001003678;NM_001003677;NM_024113,NM_001003676;NM_001003678;NM_001003677;NM_024113	hyper.chimp
11	47155152	47155333	2	cg22708233,cg04444006	TSS200,TSS1500	Island,Island	ARFGAP2,ARFGAP2	NM_032389,NM_032389	hyper.chimp
11	47192476	47192707	3	cg19486271,cg04848972,cg22081008	TSS1500,TSS1500,TSS1500	N_Shore,N_Shore,N_Shore	DDB2,DDB2,DDB2	NM_000107,NM_000107,NM_000107	hyper.chimp
11	47531854	47531859	2	cg19460817,cg25953688	TSS1500,TSS1500	S_Shore,S_Shore	CUGBP1,CUGBP1	NM_006560,NM_006560	hypo.chimp
11	49026581	49027213	3	cg06842946,cg19304273,cg24442760	_,_	Island,Island,Island	_,_	_,_	hyper.chimp
11	49536593	49536886	3	cg16857801,cg00606739,cg09469643	TSS200,TSS200,Body	_,_	LOC440040,LOC440040,LOC440040	NR_027044,NR_027044,NR_027044	hypo.chimp
11	49538951	49539703	3	cg04206351,cg09413950,cg05259545	Body,Body,Body	_,_	LOC440040,LOC440040,LOC440040	NR_027044,NR_027044,NR_027044	hypo.chimp
11	56761495	56761510	2	cg15355388,cg25072179	Body;1stExon;5UTR,TSS200;TSS200	_,_	APLNR;APLNR;APLNR,APLNR;APLNR	NR_027991;NM_005161;NM_005161,NR_027991;NM_005161
11	56846314	56846646	4	cg13487312,cg20343063,cg00489660,cg12603560	5UTR,5UTR,5UTR,5UTR	N_Shore,N_Shore,N_Shore,N_Shore	TNKS1BP1,TNKS1BP1,TNKS1BP1,TNKS1BP1	NM_033396,NM_033396,NM_033396,NM_033396
11	56988907	56989132	4	cg15641024,cg08081323,cg18048562,cg12528597	Body,Body,Body,Body	Island,Island,Island,Island	RTN4RL2,RTN4RL2,RTN4RL2,RTN4RL2	NM_178570,NM_178570,NM_178570,NM_178570
11	57275940	57275967	2	cg01270709,cg06737912	TSS200,TSS200	N_Shore,N_Shore	BTBD18,BTBD18	NM_001145101,NM_001145101
11	60916178	60916355	5	cg17379860,cg16316624,cg20208600,cg10489124,cg06956048	TSS1500,TSS1500,TSS200,TSS200,TSS200	N_Shore,N_Shore,N_Shore,N_Shore,N_Shore	TMEM216,TMEM216,TMEM216,TMEM216,TMEM216	NM_016499,NM_016499,NM_016499,NM_016499,NM_016499
11	61078831	61080243	4	cg17147820,cg08922201,cg02950427,cg14161454	Body,Body,Body,Body	N_Shore,Island,Island,S_Shore	SYT7,SYT7,SYT7,SYT7	NM_004200,NM_004200,NM_004200,NM_004200
11	62135639	62136075	2	cg12616487,cg07533529	TSS1500;Body,TSS1500;Body	N_Shore,N_Shore	ROM1;EML3,ROM1;EML3	NM_000327;NM_153265,NM_000327;NM_153265
11	62171139	62171362	3	cg05962404,cg12954619,cg16260700	TSS1500;TSS1500;Body,TSS1500;TSS1500;Body,TSS1500;TSS1500;Body	S_Shore,S_Shore,S_Shore	GANAB;GANAB;INTS5,GANAB;GANAB;INTS5,GANAB;GANAB;INTS5	NM_198335;NM_198334;NM_030628,NM_198335;NM_198334;NM_030628,NM_198335;NM_198334;NM_030628
11	62211674	62212406	3	cg03127898,cg03353995,cg01596963	3UTR,Body,Body	Island,Island,Island	LRRN4CL,LRRN4CL,LRRN4CL	NM_203422,NM_203422,NM_203422	hypo.chimp
11	58487933	58488210	4	cg12635602,cg03131724,cg18789929,cg02164335	_,_	Island,Island,Island,S_Shore	_,_	_,_	hyper.chimp
11	58492576	58492680	3	cg23971381,cg00325125,cg25801742	_,_	_,_	_,_	_,_	hyper.chimp
11	58582290	58582446	2	cg23847908,cg06747831	_,_	_,_	_,_	_,_	hyper.chimp
11	58626239	58626651	5	cg15313325,cg01976784,cg26437112,cg11104828,cg16611234	_,_	N_Shore,Island,Island,Island,Island	_,_	_,_	hyper.chimp
11	58630531	58631309	8	cg21833459,cg03004497,cg02404739,cg23633158,cg11139304,cg16540026,cg14859464,cg13864937	TSS1500;TSS1500;TSS1500,TSS1500;TSS1500;TSS1500,TSS200;TSS200;TSS200,TSS200;TSS200;TSS200,TSS200;TSS200;TSS200,TSS200;TSS200;TSS200,1stExon;5UTR;5UTR;1stExon;5UTR;1stExon,1stExon;5UTR;5UTR;1stExon;5UTR;1stExon	Island,Island,S_Shore,S_Shore,S_Shore,S_Shore,S_Shore,S_Shore	FAM111B;FAM111B;FAM111B,FAM111B;FAM111B;FAM111B,FAM111B;FAM111B;FAM111B,FAM111B;FAM111B;FAM111B,FAM111B;FAM111B;FAM111B,FAM111B;FAM111B;FAM111B,FAM111B;FAM111B;FAM111B;FAM111B;FAM111B;FAM111B,FAM111B;FAM111B;FAM111B;FAM111B;FAM111B;FAM111B	NM_001142704;NM_198947;NM_001142703,NM_001142704;NM_198947;NM_001142703,NM_001142703;NM_001142704;NM_198947,NM_001142703;NM_001142704;NM_198947,NM_001142703;NM_001142704;NM_198947,NM_001142703;NM_001142704;NM_198947,NM_001142704;NM_001142704;NM_001142703;NM_198947;NM_198947;NM_001142703,NM_001142704;NM_001142704;NM_001142703;NM_198947;NM_198947;NM_001142703	hyper.chimp
11	59081098	59081163	2	cg16082644,cg04896706	_,_	N_Shelf,N_Shelf	_,_	_,_	hyper.chimp
11	59334927	59335090	2	cg05936604,cg06925083	TSS200,TSS200	Island,S_Shore	MRPL16,MRPL16	NM_017840,NM_017840	hyper.chimp
11	60280681	60281048	2	cg19836423,cg19105504	TSS1500;TSS1500,5UTR;1stExon;5UTR;1stExon	_,_	MS4A15;MS4A15,MS4A15;MS4A15;MS4A15;MS4A15	NM_001098835;NM_152717,NM_001098835;NM_152717;NM_152717;NM_001098835	hyper.chimp
11	60685593	60685677	2	cg12474080,cg25479306	TSS200,TSS200	Island,Island	VPS37C,VPS37C	NM_017966,NM_017966	hyper.chimp
11	61040441	61040710	3	cg00009053,cg17683593,cg10442157	3UTR,3UTR,3UTR	Island,Island,Island	SYT7,SYT7,SYT7	NM_004200,NM_004200,NM_004200
11	61276354	61276363	2	cg08368973,cg15859635	TSS1500,TSS1500	Island,Island	C11orf9,C11orf9	NM_001127392,NM_001127392
11	63509952	63510174	4	cg20778582,cg09685527,cg13684444,cg19233923	5UTR;Body;1stExon,5UTR;Body;1stExon,5UTR;Body;1stExon,5UTR;Body;1stExon	N_Shore,Island,Island,Island	OTUB1;OTUB1;OTUB1,OTUB1;OTUB1;OTUB1,OTUB1;OTUB1;OTUB1,OTUB1;OTUB1;OTUB1	NM_017670;NR_003089;NM_017670,NM_017670;NR_003089;NM_017670,NM_017670;NR_003089;NM_017670,NM_017670;NR_003089;NM_017670
11	63584271	63584455	2	cg04582871,cg18545771	Body,Body	_,_	MACROD1,MACROD1	NM_014067,NM_014067
11	63972956	63973320	2	cg03074692,cg24900869	_,_	N_Shore,S_Shore	_,_	_,_
11	64737657	64737892	5	cg10133725,cg03219657,cg02780017,cg14373018,cg21080921	TSS1500,TSS1500,TSS200,TSS200,TSS200	_,_	SLC22A20,SLC22A20,SLC22A20,SLC22A20,SLC22A20	NM_001004326,NM_001004326,NM_001004326,NM_001004326,NM_001004326
11	64879833	64880086	3	cg16555856,cg27603069,cg23319460	5UTR,Body,Body	N_Shore,Island,Island	TIGD3,TIGD3,TIGD3	NM_145719,NM_145719,NM_145719	hyper.chimp
11	62316289	62316458	2	cg04288036,cg07743764	3UTR;3UTR;TSS1500,3UTR;3UTR;TSS1500	S_Shore,S_Shore	NXF1;NXF1;TMEM223,NXF1;NXF1;TMEM223	NM_001081491;NM_006362;NM_001080501,NM_001081491;NM_006362;NM_001080501	hypo.chimp
11	62377754	62378367	3	cg18159646,cg09448652,cg05512483	TSS1500;TSS1500;Body;Body,TSS200;TSS1500;TSS1500;Body,TSS1500;TSS1500;TSS1500;TSS1500;Body	N_Shelf,N_Shore,N_Shore	SNORD22;SNORD31;SNORD30;SNHG1,SNORD30;SNORD22;SNORD31;SNHG1,SNORD30;SNORD22;SNORD29;SNORD31;SNHG1	NR_000008;NR_002560;NR_002561;NR_003098,NR_002561;NR_000008;NR_002560;NR_003098,NR_002561;NR_000008;NR_002559;NR_002560;NR_003098	hypo.chimp
11	62539937	62540058	3	cg18305416,cg10068408,cg08288703	TSS200,TSS200,TSS200	_,_	SLC22A8,SLC22A8,SLC22A8	NM_004254,NM_004254,NM_004254	hypo.chimp
11	63030119	63030141	2	cg11183156,cg27376024	5UTR;1stExon;5UTR;1stExon;1stExon;5UTR,5UTR;1stExon;5UTR;1stExon;1stExon;5UTR	_,_	LGALS12;LGALS12;LGALS12;LGALS12;LGALS12;LGALS12,LGALS12;LGALS12;LGALS12;LGALS12;LGALS12;LGALS12	NM_001142535;NM_033101;NM_033101;NM_001142535;NM_001142536;NM_001142536,NM_001142535;NM_033101;NM_033101;NM_001142535;NM_001142536;NM_001142536	hypo.chimp
11	63130762	63130797	2	cg03548386,cg05642283	Body;Body,Body;Body	_,_	PLA2G16;PLA2G16,PLA2G16;PLA2G16	NM_001128203;NM_007069,NM_001128203;NM_007069	hypo.chimp
11	63204932	63205031	3	cg17372806,cg15832662,cg04111435	TSS1500;TSS1500;TSS1500;TSS1500,TSS1500;TSS1500;TSS1500;TSS1500,TSS1500;TSS1500;TSS1500;TSS1500	N_Shore,N_Shore,N_Shore	RTN3;RTN3;RTN3;RTN3,RTN3;RTN3;RTN3;RTN3,RTN3;RTN3;RTN3;RTN3	NM_201428;NM_201430;NM_201429;NM_006054,NM_201428;NM_201430;NM_201429;NM_006054,NM_201428;NM_201430;NM_201429;NM_006054	hypo.chimp
11	63432946	63434769	5	cg08669010,cg24769295,cg06982473,cg10689689,cg21609804	Body;Body;Body;Body;Body,Body;Body;Body;Body;Body,Body;Body;Body;Body;Body,3UTR;3UTR;3UTR;3UTR;3UTR,3UTR;3UTR;3UTR;3UTR;3UTR	Island,Island,Island,S_Shore,N_Shore	MARK2;MARK2;MARK2;MARK2;MARK2,MARK2;MARK2;MARK2;MARK2;MARK2,MARK2;MARK2;MARK2;MARK2;MARK2,MARK2;MARK2;MARK2;MARK2;MARK2,MARK2;MARK2;MARK2;MARK2;MARK2	NM_004954;NM_017490;NM_001039469;NM_001163297;NM_001163296,NM_004954;NM_017490;NM_001039469;NM_001163297;NM_001163296,NM_004954;NM_017490;NM_001039469;NM_001163297;NM_001163296,NM_001039469;NM_001163296;NM_004954;NM_017490;NM_001163297,NM_001039469;NM_001163296;NM_004954;NM_017490;NM_001163297	hypo.chimp
11	63522137	63522862	2	cg09687417,cg16499416	Body;3UTR,3UTR	N_Shore,Island	OTUB1;OTUB1,MACROD1	NR_003089;NM_017670,NM_014067	hypo.chimp
11	63662626	63662680	3	cg25819103,cg04725041,cg05697539	Body,Body,Body	_,_	MACROD1,MACROD1,MACROD1	NM_014067,NM_014067,NM_014067	hypo.chimp
11	63771865	63772150	2	cg07773434,cg09587634	TSS1500,TSS1500	Island,S_Shore	PPP1R14B,PPP1R14B	NM_138689,NM_138689	hypo.chimp
11	63824261	63824263	2	cg25168700,cg24027931	TSS200,TSS200	Island,Island	C11orf20,C11orf20	NM_001039496,NM_001039496	hypo.chimp
11	63829966	63830286	3	cg23073111,cg23878768,cg09458820	5UTR,5UTR,5UTR	Island,Island,Island	ESRRA,ESRRA,ESRRA	NM_004451,NM_004451,NM_004451
11	63872741	63872826	2	cg12797157,cg11657323	Body,Body	S_Shelf,S_Shelf	CCDC88B,CCDC88B	NM_032251,NM_032251
11	63933418	63933569	2	cg03071221,cg03507824	_,_	_,_	_,_	_,_
11	64238908	64240267	3	cg19691659,cg27319263,cg12938128	5UTR;5UTR,5UTR;5UTR,5UTR;5UTR	S_Shore,S_Shore,S_Shelf	NRXN2;NRXN2,NRXN2;NRXN2,NRXN2;NRXN2	NM_015080;NM_138732,NM_015080;NM_138732,NM_015080;NM_138732
11	64283765	64283993	5	cg09138437,cg09958483,cg02176069,cg26884581,cg11887214	1stExon;1stExon,1stExon;1stExon,1stExon;1stExon,1stExon;1stExon;5UTR;5UTR,1stExon;1stExon;5UTR;5UTR	_,_	PYGM;PYGM,PYGM;PYGM,PYGM;PYGM,PYGM;PYGM;PYGM;PYGM,PYGM;PYGM;PYGM;PYGM	NM_001164716;NM_005609,NM_001164716;NM_005609,NM_001164716;NM_005609,NM_001164716;NM_005609;NM_001164716;NM_005609,NM_001164716;NM_005609;NM_001164716;NM_005609
11	64708374	64708610	2	cg20138404,cg03241909	Body,Body	Island,Island	CAPN1,CAPN1	NM_005186,NM_005186
11	65131643	65131769	2	cg04798016,cg11392776	Body,Body	Island,Island	MAP3K11,MAP3K11	NM_002419,NM_002419
11	65310236	65310337	2	cg04293602,cg23220533	TSS1500,TSS1500	N_Shore,Island	OVOL1,OVOL1	NM_004561,NM_004561
11	65469402	65470469	4	cg24040948,cg16884601,cg23196081,cg21800989	TSS1500,TSS200,1stExon;5UTR,Body	_,_	TSGA10IP,TSGA10IP,TSGA10IP;TSGA10IP,TSGA10IP	NM_152762,NM_152762,NM_152762;NM_152762,NM_152762	hypo.chimp
11	65001186	65001705	5	cg01286631,cg25992645,cg09946346,cg07420702,cg14002950	_,_	N_Shore,Island,Island,Island,Island	_,_	_,_	hyper.chimp
11	65022260	65022547	3	cg07799005,cg22311458,cg17153055	Body,Body,Body	S_Shore,S_Shore,S_Shore	MALAT1,MALAT1,MALAT1	NR_002819,NR_002819,NR_002819	hyper.chimp
11	65070184	65071489	3	cg04948284,cg24392577,cg21584461	Body;Body;Body,Body;Body;Body,Body;Body;Body	N_Shore,N_Shore,Island	LTBP3;LTBP3;LTBP3,LTBP3;LTBP3;LTBP3,LTBP3;LTBP3;LTBP3	NM_001164266;NM_021070;NM_001130144,NM_001164266;NM_021070;NM_001130144,NM_001164266;NM_021070;NM_001130144	hyper.chimp
11	65170837	65171836	4	cg07982082,cg06464468,cg00083072,cg20450318	Body;Body,Body;Body,Body;Body,Body;Body	Island,Island,Island,S_Shore	SIPA1;SIPA1,SIPA1;SIPA1,SIPA1;SIPA1,SIPA1;SIPA1	NM_153253;NM_006747,NM_153253;NM_006747,NM_153253;NM_006747,NM_153253;NM_006747	hyper.chimp
11	65791257	65791411	2	cg24781737,cg15299835	3UTR;TSS1500;3UTR;3UTR;3UTR,3UTR;TSS1500;3UTR;3UTR;3UTR	N_Shore,Island	KLC2;RAB1B;KLC2;KLC2;KLC2,KLC2;RAB1B;KLC2;KLC2;KLC2	NM_001134774;NM_030981;NM_001134776;NM_022822;NM_001134775,NM_001134774;NM_030981;NM_001134776;NM_022822;NM_001134775	hypo.chimp
11	65859962	65860735	7	cg25635864,cg08931107,cg17066238,cg05049335,cg05998426,cg08995609,cg14550985	Body,Body,1stExon,1stExon;5UTR,1stExon;5UTR,TSS200,TSS200	S_Shore,S_Shore,S_Shore,S_Shore,S_Shore,S_Shore,S_Shore	RIN1,RIN1,RIN1,RIN1;RIN1,RIN1;RIN1,RIN1,RIN1	NM_004292,NM_004292,NM_004292,NM_004292;NM_004292,NM_004292;NM_004292,NM_004292,NM_004292	hyper.chimp
11	65963470	65963623	2	cg01368415,cg16564534	TSS1500;TSS1500;TSS1500,TSS1500;TSS1500;TSS1500	_,_	MRPL11;MRPL11;MRPL11,MRPL11;MRPL11;MRPL11	NM_170739;NM_016050;NM_170738,NM_170739;NM_016050;NM_170738	hypo.chimp
11	66092225	66092869	6	cg06817264,cg03423112,cg17381565,cg05087948,cg23669043,cg24987259	Body,5UTR;1stExon,TSS200,TSS200,TSS200,TSS1500	Island,Island,Island,S_Shore,S_Shore,S_Shore	CTSF,CTSF;CTSF,CTSF,CTSF,CTSF,CTSF	NM_003793,NM_003793;NM_003793,NM_003793,NM_003793,NM_003793,NM_003793
11	67006740	67008253	3	cg15286618,cg19528654,cg20973735	TSS1500,Body,Body	N_Shore,S_Shore,S_Shore	AIP,AIP,AIP	NM_003977,NM_003977,NM_003977
11	67018237	67019569	4	cg20266711,cg11736903,cg09461648,cg03496014	Body;Body,Body;Body,Body;Body,Body;Body	Island,Island,Island,S_Shore	PITPNM1;PITPNM1,PITPNM1;PITPNM1,PITPNM1;PITPNM1,PITPNM1;PITPNM1	NM_001130848;NM_004910,NM_001130848;NM_004910,NM_001130848;NM_004910,NM_001130848;NM_004910
11	67030072	67030083	2	cg08962271,cg04383058	TSS1500;TSS1500,TSS1500;TSS1500	N_Shore,N_Shore	PITPNM1;PITPNM1,PITPNM1;PITPNM1	NM_004910;NM_001130848,NM_004910;NM_001130848
11	67105885	67107239	6	cg07995438,cg19114214,cg25135322,cg25866895,cg14921275,cg09657136	_,TSS1500,TSS1500,TSS1500,TSS1500,TSS1500	N_Shore,N_Shore,N_Shore,N_Shore,N_Shore,N_Shore	_,GSTP1,GSTP1,GSTP1,GSTP1,GSTP1	_,NM_000852,NM_000852,NM_000852,NM_000852,NM_000852
11	67130201	67130553	3	cg21660623,cg17020635,cg19038228	TSS1500;TSS1500,TSS1500;TSS1500,TSS1500;TSS1500	N_Shore,N_Shore,N_Shore	NDUFV1;NDUFV1,NDUFV1;NDUFV1,NDUFV1;NDUFV1	NM_007103;NM_001166102,NM_007103;NM_001166102,NM_007103;NM_001166102
11	67174534	67174716	3	cg11096993,cg01240599,cg04565008	5UTR,5UTR,TSS200	_,_	ACY3,ACY3,ACY3	NM_080658,NM_080658,NM_080658
11	67526980	67527241	2	cg01711344,cg11027221	Body,Body	N_Shore,Island	UNC93B1,UNC93B1	NM_030930,NM_030930
11	67852625	67852741	3	cg07992044,cg24051242,cg12832726	Body,Body,Body	_,_	LRP5,LRP5,LRP5	NM_002335,NM_002335,NM_002335
11	67890907	67890974	2	cg03402922,cg05360160	Body,Body	_,_	LRP5,LRP5	NM_002335,NM_002335
11	68207972	68208275	2	cg23009355,cg02340541	TSS1500,TSS1500	Island,Island	GAL,GAL	NM_015973,NM_015973
11	68378226	68378545	2	cg24488311,cg11245990	_,_	N_Shore,N_Shore	_,_	_,_
11	68676449	68677347	8	cg26213821,cg10486439,cg15175377,cg25903143,cg00317879,cg14036981,cg19584547,cg18168310	_,_	_,N_Shelf	_,_	_,_
11	68773970	68774015	2	cg24778776,cg05205239	_,_	_,_	_,_	_,_
11	68946731	68946751	2	cg24478926,cg17341113	_,_	_,_	_,_	_,_
11	68973440	68973860	4	cg15799461,cg08885142,cg13305406,cg17064090	_,_	_,_	_,_	_,_
11	69229452	69229599	2	cg24454109,cg02513449	TSS1500,TSS1500	S_Shore,S_Shore	FGF19,FGF19	NM_005117,NM_005117
11	71430370	71430645	3	cg26632909,cg03350366,cg17997463	5UTR,5UTR,5UTR	_,_	NUMA1,NUMA1,NUMA1	NM_006185,NM_006185,NM_006185	hypo.chimp
11	66595661	66595767	3	cg22344122,cg18043888,cg00023919	3UTR,3UTR,3UTR	Island,Island,Island	RHOD,RHOD,RHOD	NM_014578,NM_014578,NM_014578
11	66813022	66813824	2	cg15172729,cg03790236	TSS1500;TSS1500,Body;Body	Island,Island	ANKRD13D;ANKRD13D,ANKRD13D;ANKRD13D	NM_207354;NR_030767,NM_207354;NR_030767
11	67139953	67140438	3	cg14500267,cg24690094,cg04647918	_,_	N_Shore,Island,S_Shore	_,_	_,_
11	67144226	67144511	2	cg05233950,cg26428032	_,_	S_Shelf,_	_,_	_,_
11	67528302	67528367	2	cg25756680,cg04108360	TSS200,TSS200	S_Shore,S_Shore	UNC93B1,UNC93B1	NM_030930,NM_030930
11	67534194	67534528	6	cg05620821,cg15322932,cg24390938,cg14871333,cg02331303,cg07730301	TSS200;TSS200;5UTR,TSS200;TSS200;5UTR,TSS200;TSS200;5UTR,TSS200;TSS200;5UTR,1stExon;5UTR;5UTR;1stExon;5UTR,5UTR;5UTR;5UTR	_,_	ALDH3B1;ALDH3B1;ALDH3B1,ALDH3B1;ALDH3B1;ALDH3B1,ALDH3B1;ALDH3B1;ALDH3B1,ALDH3B1;ALDH3B1;ALDH3B1,ALDH3B1;ALDH3B1;ALDH3B1;ALDH3B1;ALDH3B1,ALDH3B1;ALDH3B1;ALDH3B1	NM_001030010;NM_000694;NM_001161473,NM_001030010;NM_000694;NM_001161473,NM_001030010;NM_000694;NM_001161473,NM_001030010;NM_000694;NM_001161473,NM_000694;NM_001030010;NM_000694;NM_001030010;NM_001161473,NM_001030010;NM_000694;NM_001161473
11	68818030	68818049	2	cg08759026,cg20363347	TSS200,TSS200	_,_	MYEOV,MYEOV	NM_138768,NM_138768
11	68995412	68995533	3	cg21408915,cg15442037,cg18498241	_,_	Island,Island,Island	_,_	_,_
11	69298029	69298303	2	cg23854488,cg02409815	Body,Body	Island,Island	FGF4,FGF4	NM_002007,NM_002007
11	69413429	69413464	2	cg14825633,cg04932928	_,_	N_Shelf,N_Shelf	_,_	_,_
11	71501705	71501813	3	cg07596299,cg18441811,cg06680201	TSS1500,TSS1500,TSS1500	S_Shore,S_Shore,S_Shore	C11orf51,C11orf51,C11orf51	NM_014042,NM_014042,NM_014042
11	71822774	71823563	3	cg06872163,cg01693503,cg24209994	1stExon,TSS200,TSS1500	N_Shore,S_Shore,S_Shore	CLPB,CLPB,CLPB	NM_030813,NM_030813,NM_030813
11	72140611	72140979	2	cg21931656,cg07031551	5UTR,5UTR	N_Shore,Island	ARAP1,ARAP1	NM_001040118,NM_001040118
11	73372449	73372516	2	cg11417675,cg22166739	TSS1500,TSS1500	Island,S_Shore	UCP2,UCP2	NM_003355,NM_003355
11	73699996	73700558	4	cg05671350,cg00211630,cg26758986,cg12538950	Body,TSS200,TSS200,TSS1500	N_Shore,S_Shore,S_Shore,S_Shore	P4HA3,P4HA3,P4HA3,P4HA3	NM_182904,NM_182904,NM_182904,NM_182904
11	73855762	73856531	8	cg23189044,cg05789714,cg16105620,cg04574090,cg02595219,cg11775521,cg18838431,cg16839921	5UTR,5UTR;1stExon,TSS200,TSS200,TSS200,TSS200,TSS1500,TSS1500	N_Shore,Island,Island,Island,Island,Island,Island,S_Shore	KCNE3,KCNE3;KCNE3,KCNE3,KCNE3,KCNE3,KCNE3,KCNE3,KCNE3	NM_005472,NM_005472;NM_005472,NM_005472,NM_005472,NM_005472,NM_005472,NM_005472,NM_005472
11	74723915	74724002	3	cg18821418,cg22969079,cg17074821	Body;TSS200;Body,Body;TSS200;Body,Body;TSS200;Body	_,_	ARRB1;MIR326;ARRB1,ARRB1;MIR326;ARRB1,ARRB1;MIR326;ARRB1	NM_020251;NR_029891;NM_004041,NM_020251;NR_029891;NM_004041,NM_020251;NR_029891;NM_004041
11	74739486	74739873	2	cg02449461,cg16036142	Body;Body,Body;Body	N_Shore,Island	ARRB1;ARRB1,ARRB1;ARRB1	NM_020251;NM_004041,NM_020251;NM_004041
11	75541178	75541279	2	cg11926776,cg23279335	_,_	_,_	_,_	_,_
11	76454973	76455443	2	cg25948980,cg01449846	TSS1500,TSS200	N_Shore,Island	CAPN5,CAPN5	NM_004055,NM_004055
11	76516397	76517124	6	cg02420069,cg20062305,cg08036798,cg17957640,cg14708990,cg06334307	TSS1500;TSS1500;TSS1500,TSS200;TSS200;TSS200,TSS200;TSS200;TSS200,TSS200;TSS200;TSS200,TSS200;TSS200;TSS200,1stExon;5UTR;1stExon;5UTR;1stExon;5UTR	_,_	MYO7A;MYO7A;MYO7A,MYO7A;MYO7A;MYO7A,MYO7A;MYO7A;MYO7A,MYO7A;MYO7A;MYO7A,MYO7A;MYO7A;MYO7A,MYO7A;MYO7A;MYO7A;MYO7A;MYO7A;MYO7A	NM_001127180;NM_000260;NM_001127179,NM_001127180;NM_000260;NM_001127179,NM_001127180;NM_000260;NM_001127179,NM_001127180;NM_000260;NM_001127179,NM_001127180;NM_000260;NM_001127179,NM_001127179;NM_001127179;NM_000260;NM_000260;NM_001127180;NM_001127180	hyper.chimp
11	71580767	71580875	2	cg14818960,cg09080444	5UTR;5UTR;5UTR;TSS200,Body;Body;Body;1stExon	_,_	FOLR1;FOLR1;FOLR1;FOLR1,FOLR1;FOLR1;FOLR1;FOLR1	NM_000802;NM_016724;NM_016725;NM_016729,NM_016724;NM_016725;NM_000802;NM_016729
11	72085834	72086042	3	cg16617141,cg00238848,cg27090029	Body;Body;Body,Body;Body;Body,Body;Body;Body	Island,Island,Island	ARAP1;ARAP1;ARAP1,ARAP1;ARAP1;ARAP1,ARAP1;ARAP1;ARAP1	NM_001135190;NM_015242;NM_001040118,NM_001135190;NM_015242;NM_001040118,NM_001135190;NM_015242;NM_001040118
11	72713827	72713895	2	cg06640773,cg06059409	Body,Body	_,_	ARHGEF17,ARHGEF17	NM_014786,NM_014786
11	72764664	72764853	2	cg02855207,cg09573890	TSS1500;TSS1500,TSS1500;TSS200	N_Shore,N_Shore	RELT;RELT,RELT;RELT	NM_032871;NM_152222,NM_032871;NM_152222
11	73037310	73037635	3	cg08823954,cg13361558,cg19478111	5UTR;TSS200;5UTR;Body;Body,5UTR;5UTR;5UTR;Body;Body;1stExon,5UTR;5UTR;5UTR;Body;Body;1stExon	_,_	PLEKHB1;PLEKHB1;PLEKHB1;PLEKHB1;PLEKHB1,PLEKHB1;PLEKHB1;PLEKHB1;PLEKHB1;PLEKHB1;PLEKHB1,PLEKHB1;PLEKHB1;PLEKHB1;PLEKHB1;PLEKHB1;PLEKHB1	NM_001130034;NM_001130036;NM_001130035;NM_001130033;NM_021200,NM_001130034;NM_001130036;NM_001130035;NM_001130033;NM_021200;NM_001130036,NM_001130034;NM_001130036;NM_001130035;NM_001130033;NM_021200;NM_001130036
11	73980660	73980942	2	cg26885816,cg08923614	TSS1500,TSS1500	N_Shore,N_Shore	POLD3,POLD3	NM_006591,NM_006591
11	75157056	75157819	2	cg04374654,cg22173131	TSS1500,Body	N_Shore,Island	DGAT2,DGAT2	NM_032564,NM_032564
11	85015900	85016121	2	cg21787323,cg20275558	TSS1500;5UTR,TSS1500;TSS200	N_Shore,N_Shore	TMEM126B;DLG2,TMEM126B;DLG2	NM_018480;NM_001142699,NM_018480;NM_001142699	hypo.chimp
11	76580640	76580831	2	cg04367164,cg00497905	Body;Body,Body;Body	_,_	MYO7A;MYO7A,MYO7A;MYO7A	NM_000260;NM_001127180,NM_000260;NM_001127180	hyper.chimp
11	78350280	78350748	3	cg12245084,cg12162138,cg17542408	Body,Body,Body	N_Shore,Island,Island	ODZ4,ODZ4,ODZ4	NM_001098816,NM_001098816,NM_001098816	hyper.chimp
11	85054118	85054596	2	cg14994180,cg05864010	TSS1500;TSS1500;TSS1500;TSS1500;TSS1500,TSS1500;TSS1500;TSS1500;TSS1500;TSS1500	S_Shore,S_Shore	CREBZF;CREBZF;CREBZF;CREBZF;CREBZF,CREBZF;CREBZF;CREBZF;CREBZF;CREBZF	NR_028025;NR_028027;NR_028026;NM_001039618;NR_028024,NR_028025;NR_028027;NR_028026;NM_001039618;NR_028024	hypo.chimp
11	85199487	85199943	2	cg27051290,cg26349554	5UTR,TSS200	N_Shore,S_Shore	SYTL2,SYTL2	NM_032943,NM_032943
11	85243944	85244208	3	cg25872744,cg16165120,cg15822411	5UTR;1stExon,5UTR;1stExon,5UTR;1stExon	Island,Island,S_Shore	CCDC83;CCDC83,CCDC83;CCDC83,CCDC83;CCDC83	NM_173556;NM_173556,NM_173556;NM_173556,NM_173556;NM_173556	hyper.chimp
11	85243123	85243207	2	cg15992347,cg13790353	TSS1500,TSS1500	N_Shore,N_Shore	CCDC83,CCDC83	NM_173556,NM_173556	hypo.chimp
11	85763014	85763749	3	cg08897150,cg04573398,cg25500444	TSS1500;TSS1500,1stExon;5UTR;1stExon;5UTR,1stExon;5UTR;1stExon;5UTR	N_Shore,Island,S_Shore	CCDC81;CCDC81,CCDC81;CCDC81;CCDC81;CCDC81,CCDC81;CCDC81;CCDC81;CCDC81	NM_021827;NM_001156474,NM_001156474;NM_001156474;NM_021827;NM_021827,NM_001156474;NM_001156474;NM_021827;NM_021827	hypo.chimp
11	88435740	88436362	4	cg08616516,cg08512142,cg02052905,cg26068283	5UTR,5UTR,5UTR,5UTR;1stExon	_,_	GRM5,GRM5,GRM5,GRM5;GRM5	NM_000842,NM_000842,NM_000842,NM_000842;NM_000842	hypo.chimp
11	88436733	88437083	2	cg04470971,cg18946932	TSS1500,TSS1500	_,_	GRM5,GRM5	NM_000842,NM_000842	hyper.chimp
11	93773663	93773883	2	cg27307378,cg22325703	Body,1stExon	N_Shore,Island	GPR83,GPR83	NM_016540,NM_016540	hyper.chimp
11	93918055	93918105	3	cg05229803,cg11412713,cg08863777	1stExon,1stExon,1stExon	Island,Island,Island	FUT4,FUT4,FUT4	NM_002033,NM_002033,NM_002033	hyper.chimp
11	100960033	100960206	2	cg23644960,cg18137040	TSS200,TSS1500	S_Shore,S_Shore	TRPC6,TRPC6	NM_004621,NM_004621	hyper.chimp
11	101423191	101423785	2	cg23440331,cg19809039	TSS1500,1stExon	N_Shore,S_Shore	C11orf70,C11orf70	NM_032930,NM_032930	hypo.chimp
11	101644602	101644734	3	cg06483452,cg02268748,cg00295604	_,_	N_Shore,Island,Island	_,_	_,_	hyper.chimp
11	101693108	101693235	3	cg14504418,cg14481222,cg23565749	TSS1500;TSS1500,TSS1500;TSS1500,TSS200;TSS200	N_Shore,N_Shore,N_Shore	BIRC3;BIRC3,BIRC3;BIRC3,BIRC3;BIRC3	NM_182962;NM_001165,NM_182962;NM_001165,NM_182962;NM_001165	hypo.chimp
11	102183939	102183989	2	cg10860860,cg08378220	_,_	_,_	_,_	_,_	hyper.chimp
11	102207495	102207624	2	cg09122096,cg02344527	_,_	_,_	_,_	_,_	hyper.chimp
11	106942189	106942261	2	cg09156610,cg14882481	TSS1500,TSS1500	_,_	ALKBH8,ALKBH8	NM_138775,NM_138775	hyper.chimp
11	110089092	110089273	2	cg04417028,cg03110368	TSS1500,TSS1500	Island,S_Shore	ARHGAP20,ARHGAP20	NM_020809,NM_020809	hypo.chimp
11	111287817	111288709	8	cg15545878,cg13084335,cg10048349,cg01158277,cg00514609,cg15204861,cg07476508,cg12947833	TSS200;TSS1500,TSS200;TSS1500,TSS1500;TSS200,TSS1500;TSS200,TSS1500;TSS200,TSS1500;TSS200,TSS1500;TSS200,5UTR;TSS1500;1stExon	_,_	CRYAB;HSPB2,CRYAB;HSPB2,CRYAB;HSPB2,CRYAB;HSPB2,CRYAB;HSPB2,CRYAB;HSPB2,CRYAB;HSPB2,HSPB2;CRYAB;HSPB2	NM_001885;NM_001541,NM_001885;NM_001541,NM_001885;NM_001541,NM_001885;NM_001541,NM_001885;NM_001541,NM_001885;NM_001541,NM_001885;NM_001541,NM_001541;NM_001885;NM_001541
11	111461857	111462868	3	cg04269747,cg19537591,cg16711165	Body;TSS1500;Body,Body;TSS1500;Body,TSS200;TSS200;1stExon	N_Shore,N_Shore,Island	TIMM8B;SDHD;TIMM8B,TIMM8B;SDHD;TIMM8B,TIMM8B;TIMM8B;SDHD	NM_012459;NM_003002;NR_028383,NM_012459;NM_003002;NR_028383,NR_028383;NM_012459;NM_003002
11	117735258	117735305	3	cg24994249,cg20492912,cg09096950	TSS1500,TSS1500,TSS1500	N_Shore,N_Shore,N_Shore	UBE4A,UBE4A,UBE4A	NM_004788,NM_004788,NM_004788
11	117907490	117907750	2	cg15694715,cg19715094	5UTR;5UTR;5UTR;5UTR;5UTR;5UTR,Body;Body;Body;Body;Body;Body	S_Shore,S_Shore	TMEM25;TMEM25;TMEM25;TMEM25;TMEM25;TMEM25,TMEM25;TMEM25;TMEM25;TMEM25;TMEM25;TMEM25	NM_001144035;NM_001144038;NM_001144037;NM_032780;NM_001144034;NM_001144036,NM_001144037;NM_001144036;NM_032780;NM_001144038;NM_001144034;NM_001144035
11	118571816	118572201	3	cg17601287,cg24085502,cg05683451	TSS200,TSS1500,TSS1500	_,_	CCDC153,CCDC153,CCDC153	NM_001145018,NM_001145018,NM_001145018
11	122513618	122513709	2	cg12995113,cg13153466	Body,Body	_,_	ASAM,ASAM	NM_024769,NM_024769
11	122901249	122901803	6	cg03627771,cg26393964,cg14374432,cg01699740,cg13647528,cg06174296	TSS1500,TSS1500,TSS200,TSS200,TSS200,1stExon;5UTR	_,_	GRAMD1B,GRAMD1B,GRAMD1B,GRAMD1B,GRAMD1B,GRAMD1B;GRAMD1B	NM_020716,NM_020716,NM_020716,NM_020716,NM_020716,NM_020716;NM_020716	hypo.chimp
11	111462792	111462806	2	cg03950669,cg13186466	TSS200;TSS200;1stExon;5UTR,TSS200;TSS200;1stExon;5UTR	Island,Island	TIMM8B;TIMM8B;SDHD;SDHD,TIMM8B;TIMM8B;SDHD;SDHD	NR_028383;NM_012459;NM_003002;NM_003002,NR_028383;NM_012459;NM_003002;NM_003002	hyper.chimp
11	112336891	112336938	2	cg20783319,cg22173837	TSS1500;TSS1500;TSS1500,TSS1500;TSS1500;TSS1500	N_Shore,N_Shore	NCAM1;NCAM1;NCAM1,NCAM1;NCAM1;NCAM1	NM_001076682;NM_181351;NM_000615,NM_001076682;NM_181351;NM_000615	hyper.chimp
11	113350697	113351227	2	cg00078348,cg23764129	TSS1500;TSS1500,1stExon;5UTR;5UTR;1stExon	_,_	HTR3A;HTR3A,HTR3A;HTR3A;HTR3A;HTR3A	NM_213621;NM_000869,NM_000869;NM_213621;NM_000869;NM_213621	hyper.chimp
11	113775773	113776684	2	cg20303232,cg11907564	Body;TSS1500,TSS1500;1stExon	N_Shore,Island	C11orf71;RBM7,C11orf71;RBM7	NM_019021;NM_016090,NM_019021;NM_016090	hyper.chimp
11	116163871	116164063	2	cg14371153,cg27192902	1stExon,TSS200	Island,Island	ZNF259,ZNF259	NM_003904,NM_003904	hyper.chimp
11	116819917	116819969	2	cg23739457,cg09519504	Body,Body	_,_	DSCAML1,DSCAML1	NM_020693,NM_020693	hyper.chimp
11	117170605	117170832	3	cg26434090,cg14249078,cg06468072	Body,Body,Body	N_Shore,N_Shore,N_Shore	DSCAML1,DSCAML1,DSCAML1	NM_020693,NM_020693,NM_020693	hyper.chimp
11	117253696	117253722	2	cg10719604,cg11171549	TSS1500;TSS1500;TSS1500;TSS1500;TSS1500,TSS1500;TSS1500;TSS1500;TSS1500;TSS1500	S_Shore,S_Shore	FXYD6;FXYD6;FXYD6;FXYD6;FXYD6,FXYD6;FXYD6;FXYD6;FXYD6;FXYD6	NM_001164836;NM_001164831;NM_022003;NM_001164832;NM_001164837,NM_001164836;NM_001164831;NM_022003;NM_001164832;NM_001164837	hyper.chimp
11	117520794	117521075	2	cg19926902,cg25329844	Body;5UTR;Body;Body,Body;1stExon;5UTR;Body;Body	N_Shore,N_Shore	SCN4B;SCN4B;SCN4B;SCN4B,SCN4B;SCN4B;SCN4B;SCN4B;SCN4B	NM_001142348;NM_001142349;NM_174934;NR_024527,NM_001142348;NM_001142349;NM_001142349;NM_174934;NR_024527	hyper.chimp
11	117527527	117527817	2	cg05008975,cg22251955	Body;Body,Body;Body	N_Shore,N_Shore	SCN4B;SCN4B,SCN4B;SCN4B	NM_001142348;NM_174934,NM_001142348;NM_174934	hyper.chimp
11	118714971	118715501	2	cg19002131,cg02771202	3UTR;3UTR,Body;3UTR	N_Shore,Island	C1QTNF5;MFRP,C1QTNF5;MFRP	NM_015645;NM_031433,NM_015645;NM_031433
11	118793962	118794200	2	cg25491905,cg10055265	3UTR,3UTR	N_Shelf,N_Shelf	THY1,THY1	NM_006288,NM_006288
11	119892512	119893042	3	cg06995068,cg07415423,cg07353266	_,_	_,_	_,_	_,_
11	121578421	121579221	3	cg18730174,cg08087655,cg10262710	Body,Body,TSS1500	_,_	LOC399959,LOC399959,LOC399959	NR_024430,NR_024430,NR_024430
11	124252382	124252454	2	cg01253160,cg17272642	Body,Body	S_Shore,S_Shore	ROBO3,ROBO3	NM_022370,NM_022370
11	125960806	125961329	4	cg03387585,cg16948827,cg16628183,cg06230206	Body;Body,Body;Body,Body;Body,Body;Body	_,_	KIRREL3;KIRREL3,KIRREL3;KIRREL3,KIRREL3;KIRREL3,KIRREL3;KIRREL3	NM_001161707;NM_032531,NM_001161707;NM_032531,NM_001161707;NM_032531,NM_001161707;NM_032531
11	128199171	128199889	7	cg15509024,cg13019868,cg16777618,cg09813060,cg07690882,cg20933297,cg09971562	_,_	N_Shore,Island,Island,Island,Island,Island,Island	_,_	_,_
11	128277565	128277765	2	cg19979370,cg27292710	5UTR;3UTR,5UTR;Body	_,_	KCNJ5;C11orf45,KCNJ5;C11orf45	NM_000890;NM_145013,NM_000890;NM_145013	hyper.chimp
11	122935785	122936372	5	cg08335254,cg12461287,cg23710751,cg05543458,cg17637327	Body,Body,Body,Body,Body	_,_	GRAMD1B,GRAMD1B,GRAMD1B,GRAMD1B,GRAMD1B	NM_020716,NM_020716,NM_020716,NM_020716,NM_020716	hypo.chimp
11	124611266	124611345	3	cg03252786,cg04164023,cg07747661	5UTR,5UTR,5UTR	_,_	PKNOX2,PKNOX2,PKNOX2	NM_022062,NM_022062,NM_022062
11	124871716	124871800	2	cg23366166,cg19433435	TSS1500;TSS1500,TSS1500;TSS1500	S_Shore,S_Shore	FEZ1;FEZ1,FEZ1;FEZ1	NM_022549;NM_005103,NM_022549;NM_005103
11	125678456	125678778	4	cg10499172,cg20559217,cg22911867,cg13877106	TSS1500,TSS200,TSS200,TSS200	N_Shore,N_Shore,Island,Island	DCPS,DCPS,DCPS,DCPS	NM_014026,NM_014026,NM_014026,NM_014026
11	127896481	127896704	3	cg26559804,cg26503877,cg11588197	Body;Body;Body,Body;Body;Body,Body;Body;Body	N_Shore,N_Shore,N_Shore	ETS1;ETS1;ETS1,ETS1;ETS1;ETS1,ETS1;ETS1;ETS1	NM_001143820;NM_001162422;NM_005238,NM_001143820;NM_001162422;NM_005238,NM_001143820;NM_001162422;NM_005238
11	129824901	129824946	2	cg12444117,cg12007053	1stExon,1stExon	Island,Island	ADAMTS15,ADAMTS15	NM_139055,NM_139055
11	132087698	132087850	2	cg13593391,cg26337816	Body;Body,Body;Body	_,_	OPCML;OPCML,OPCML;OPCML	NM_002545;NM_001012393,NM_002545;NM_001012393
11	132954339	132954737	3	cg15619177,cg12115882,cg02841651	_,_	_,_	_,_	_,_
11	133303056	133303121	2	cg09843573,cg02046143	Body,Body	N_Shelf,N_Shelf	IGSF9B,IGSF9B	NM_014987,NM_014987
11	133878370	133878591	3	cg00402352,cg24996315,cg10866445	_,_	_,_	_,_	_,_
12	1808229	1808417	2	cg03882634,cg01214459	Body;Body;Body;Body,Body;Body;Body;Body	_,_	LRTM2;LRTM2;CACNA2D4;LRTM2,LRTM2;LRTM2;CACNA2D4;LRTM2	NM_001163925;NM_001039029;NM_172364;NM_001163926,NM_001163925;NM_001039029;NM_172364;NM_001163926
12	1919234	1919340	2	cg19244722,cg22486621	_,_	_,_	_,_	_,_
12	2814163	2814697	3	cg00830029,cg06997549,cg02852959	1stExon,5UTR;1stExon,TSS1500	_,_	NRIP2,NRIP2;NRIP2,NRIP2	NM_031474,NM_031474;NM_031474,NM_031474	hypo.chimp
11	128655492	128655539	2	cg26812411,cg05428701	_,_	S_Shore,S_Shore	_,_	_,_	hyper.chimp
11	131284679	131284814	3	cg08097520,cg27644715,cg25642917	TSS1500;TSS1500;TSS1500;Body,TSS1500;TSS1500;TSS1500;Body,TSS1500;TSS1500;TSS1500;Body	N_Shore,N_Shore,N_Shore	NTM;NTM;NTM;NTM,NTM;NTM;NTM;NTM,NTM;NTM;NTM;NTM	NM_016522;NM_001144059;NM_001144058;NM_001048209,NM_016522;NM_001144059;NM_001144058;NM_001048209,NM_016522;NM_001144059;NM_001144058;NM_001048209	hyper.chimp
11	132458449	132458619	2	cg11687330,cg08327706	Body,Body	Island,S_Shore	OPCML,OPCML	NM_001012393,NM_001012393	hyper.chimp
11	133306010	133306123	2	cg03392386,cg18057887	Body,Body	Island,Island	IGSF9B,IGSF9B	NM_014987,NM_014987	hyper.chimp
11	133326047	133326462	4	cg01152015,cg19180056,cg03326252,cg19907915	Body,Body,Body,Body	_,_	IGSF9B,IGSF9B,IGSF9B,IGSF9B	NM_014987,NM_014987,NM_014987,NM_014987	hyper.chimp
11	133599830	133599861	2	cg14093526,cg12977318	1stExon;5UTR;TSS200,1stExon;5UTR;TSS1500	Island,Island	VPS26B;VPS26B;NCAPD3,VPS26B;VPS26B;NCAPD3	NM_052875;NM_052875;NM_015261,NM_052875;NM_052875;NM_015261	hyper.chimp
11	133841618	133841686	3	cg11464290,cg14123920,cg00672147	_,_	Island,Island,Island	_,_	_,_	hyper.chimp
12	118557	119547	5	cg00292513,cg25396728,cg10356759,cg18435000,cg10071059	Body;Body,Body;Body,Body;Body,Body;Body,Body;Body	Island,Island,S_Shore,S_Shore,S_Shore	IQSEC3;IQSEC3,IQSEC3;IQSEC3,IQSEC3;IQSEC3,IQSEC3;IQSEC3,IQSEC3;IQSEC3	NM_001170738;NM_015232,NM_001170738;NM_015232,NM_001170738;NM_015232,NM_001170738;NM_015232,NM_001170738;NM_015232	hyper.chimp
12	192475	193092	2	cg11280858,cg12415569	5UTR;5UTR;5UTR,5UTR;1stExon;TSS1500;5UTR	_,_	SLC6A12;SLC6A12;SLC6A12,SLC6A12;SLC6A12;SLC6A12;SLC6A12	NM_001122847;NM_003044;NM_001122848,NM_001122847;NM_001122847;NM_003044;NM_001122848
12	610241	610599	3	cg14911689,cg26654770,cg01201512	Body,Body,Body	_,_	NINJ2,NINJ2,NINJ2	NM_016533,NM_016533,NM_016533
12	2604466	2604852	2	cg23475725,cg21793437	Body;Body;Body;Body;Body;Body;Body;Body;Body;Body;Body;Body;Body;Body;Body;Body;Body;Body;Body;Body;Body;Body;Body,Body;Body;Body;Body;Body;Body;Body;Body;Body;Body;Body;Body;Body;Body;Body;Body;Body;Body;Body;Body;Body;Body;Body	_,_	CACNA1C;CACNA1C;CACNA1C;CACNA1C;CACNA1C;CACNA1C;CACNA1C;CACNA1C;CACNA1C;CACNA1C;CACNA1C;CACNA1C;CACNA1C;CACNA1C;CACNA1C;CACNA1C;CACNA1C;CACNA1C;CACNA1C;CACNA1C;CACNA1C;CACNA1C;CACNA1C,CACNA1C;CACNA1C;CACNA1C;CACNA1C;CACNA1C;CACNA1C;CACNA1C;CACNA1C;CACNA1C;CACNA1C;CACNA1C;CACNA1C;CACNA1C;CACNA1C;CACNA1C;CACNA1C;CACNA1C;CACNA1C;CACNA1C;CACNA1C;CACNA1C;CACNA1C;CACNA1C	NM_001129844;NM_001129827;NM_001129839;NM_001129834;NM_001129841;NM_000719;NM_001129830;NM_001167625;NM_001129843;NM_001167624;NM_001129835;NM_001129837;NM_001167623;NM_001129840;NM_199460;NM_001129833;NM_001129832;NM_001129829;NM_001129846;NM_001129836;NM_001129838;NM_001129831;NM_001129842,NM_001129844;NM_001129827;NM_001129839;NM_001129834;NM_001129841;NM_000719;NM_001129830;NM_001167625;NM_001129843;NM_001167624;NM_001129835;NM_001129837;NM_001167623;NM_001129840;NM_199460;NM_001129833;NM_001129832;NM_001129829;NM_001129846;NM_001129836;NM_001129838;NM_001129831;NM_001129842
12	2857218	2857399	2	cg18470891,cg08822635	TSS1500;Body;Body;TSS1500;TSS1500;Body,TSS1500;Body;Body;TSS1500;TSS1500;Body	S_Shore,S_Shore	FOXM1;C12orf32;C12orf32;FOXM1;FOXM1;C12orf32,FOXM1;C12orf32;C12orf32;FOXM1;FOXM1;C12orf32	NM_021953;NR_027363;NR_027365;NM_202003;NM_202002;NR_027364,NM_021953;NR_027363;NR_027365;NM_202003;NM_202002;NR_027364
12	3279666	3279727	2	cg19978540,cg26643128	_,_	_,_	_,_	_,_
12	3436357	3436394	2	cg04941278,cg16746589	_,_	_,_	_,_	_,_
12	6036077	6036434	3	cg26819609,cg04053108,cg20837463	Body,Body,Body	N_Shore,Island,Island	VWF,VWF,VWF	NM_000552,NM_000552,NM_000552
12	6353969	6354990	4	cg16048383,cg18738906,cg00773370,cg11785537	Body;Body;1stExon,Body;Body;1stExon,Body;Body;1stExon,Body;TSS1500;1stExon;5UTR	_,_	SCNN1A;SCNN1A;SCNN1A,SCNN1A;SCNN1A;SCNN1A,SCNN1A;SCNN1A;SCNN1A,SCNN1A;SCNN1A;SCNN1A;SCNN1A	NM_001159575;NM_001038;NM_001159576,NM_001159575;NM_001038;NM_001159576,NM_001159575;NM_001038;NM_001159576,NM_001159575;NM_001159576;NM_001038;NM_001038	hyper.chimp
12	3242147	3242169	3	cg14774511,cg07915730,cg17517613	Body;Body,Body;Body,Body;Body	_,_	TSPAN9;TSPAN9,TSPAN9;TSPAN9,TSPAN9;TSPAN9	NM_006675;NM_001168320,NM_006675;NM_001168320,NM_006675;NM_001168320	hypo.chimp
12	3900185	3900268	2	cg26863534,cg06782204	_,_	_,_	_,_	_,_	hypo.chimp
12	4890463	4891348	3	cg26590537,cg08832227,cg02793415	5UTR,Body,Body	Island,Island,Island	KCNA1,KCNA1,KCNA1	NM_000217,NM_000217,NM_000217
12	6356142	6357313	4	cg07933926,cg18883951,cg22245858,cg09680149	Body;TSS1500;TSS1500,TSS200,TSS200,TSS1500	_,_	SCNN1A;SCNN1A;SCNN1A,SCNN1A,SCNN1A,SCNN1A	NM_001159575;NM_001159576;NM_001038,NM_001159575,NM_001159575,NM_001159575
12	6431613	6431808	2	cg03954861,cg22140363	1stExon;TSS1500;5UTR,Body;TSS1500	_,_	TAPBPL;LOC678655;TAPBPL,TAPBPL;LOC678655	NM_018009;NR_015382;NM_018009,NM_018009;NR_015382	hypo.chimp
12	6363264	6363539	4	cg23079808,cg07648238,cg08740698,cg10452531	TSS1500,TSS200,TSS200,TSS200	Island,Island,Island,Island	LTBR,LTBR,LTBR,LTBR	NM_002342,NM_002342,NM_002342,NM_002342	hyper.chimp
12	6519031	6520157	4	cg11053466,cg02149069,cg02954562,cg12209075	3UTR;3UTR;3UTR,Body;Body;Body,Body;Body;Body,Body;Body;Body	N_Shore,Island,Island,Island	IFFO1;IFFO1;IFFO1,IFFO1;IFFO1;IFFO1,IFFO1;IFFO1;IFFO1,IFFO1;IFFO1;IFFO1	NM_080730;NM_080731;NM_001039670,NM_080730;NM_001039670;NM_080731,NM_080730;NM_001039670;NM_080731,NM_080730;NM_001039670;NM_080731
12	6751856	6752344	5	cg02695343,cg10500147,cg17213699,cg19872463,cg01820374	TSS200,TSS200,TSS200,TSS200,Body	N_Shore,N_Shore,N_Shore,N_Shore,N_Shore	LAG3,LAG3,LAG3,LAG3,LAG3	NM_002286,NM_002286,NM_002286,NM_002286,NM_002286
12	6829918	6830303	2	cg27042065,cg27181013	Body,TSS1500;TSS1500;Body	N_Shore,N_Shore	CDCA3,USP5;USP5;CDCA3	NM_031299,NM_001098536;NM_003481;NM_031299
12	6846030	6846390	2	cg15325042,cg01607849	TSS1500;3UTR;TSS1500;3UTR,TSS1500;TSS1500;TSS1500	N_Shore,N_Shore	TPI1;USP5;TPI1;USP5,TPI1;TPI1;TPI1	NM_001159287;NM_001098536;NM_000365;NM_003481,NM_001159287;NR_027483;NM_000365
12	6863841	6864197	2	cg08965744,cg09719850	Body,_	_,_	RPL13P5,_	NR_002803,_
12	6940823	6940993	3	cg19942083,cg07114810,cg12498580	_,_	_,_	_,_	_,_
12	7153246	7153413	2	cg22593785,cg01074767	TSS200;Body,TSS1500;Body	_,_	C1RL;LOC283314,C1RL;LOC283314	NM_016546;NR_026947,NM_016546;NR_026947
12	9118440	9118504	4	cg11139127,cg08012045,cg27166707,cg26665904	Body,Body,Body,Body	_,_	A2M,A2M,A2M,A2M	NM_000014,NM_000014,NM_000014,NM_000014
12	12759957	12760250	2	cg24274665,cg06197769	_,TSS1500	N_Shore,N_Shore	_,CDKN1B	_,NM_004064
12	12763019	12763953	5	cg09740133,cg15455156,cg11728497,cg26386886,cg13289884	Body,Body,3UTR,3UTR,3UTR	S_Shore,S_Shore,S_Shore,S_Shore,S_Shore	CDKN1B,CDKN1B,CDKN1B,CDKN1B,CDKN1B	NM_004064,NM_004064,NM_004064,NM_004064,NM_004064	hypo.chimp
12	6626349	6627012	4	cg25683185,cg12216208,cg10282807,cg23983517	Body,Body,1stExon;5UTR,TSS200	Island,Island,Island,S_Shore	ACRBP,ACRBP,ACRBP;ACRBP,ACRBP	NM_032489,NM_032489,NM_032489;NM_032489,NM_032489
12	6803583	6803712	2	cg13987192,cg27310594	Body;Body,Body;Body	Island,Island	GPR162;GPR162,GPR162;GPR162	NM_019858;NM_014449,NM_019858;NM_014449
12	6925414	6926269	2	cg22335340,cg04956511	TSS1500;3UTR,Body	S_Shore,S_Shelf	PTPN6;C12orf57,PTPN6	NM_080548;NM_138425,NM_080548	hyper.chimp
12	6942988	6943440	2	cg27534624,cg23067082	TSS1500;TSS200,TSS200	_,_	MIR141;MIR200C,MIR141	NR_029682;NR_029779,NR_029682	hyper.chimp
12	7136171	7137031	2	cg08799922,cg15776355	1stExon;5UTR,TSS1500	_,_	C1R;C1R,C1R	NM_001733;NM_001733,NM_001733
12	7483674	7483776	2	cg08215400,cg10930513	Body,Body	Island,Island	CD163L1,CD163L1	NM_174941,NM_174941
12	7832119	7832310	2	cg12688240,cg01734240	TSS1500,TSS1500	_,_	NANOG,NANOG	NM_024865,NM_024865
12	8125281	8125813	2	cg11501644,cg13443953	TSS1500;TSS1500,TSS1500;TSS1500	N_Shore,N_Shore	NECAP1;NECAP1,NECAP1;NECAP1	NM_015509;NR_024260,NM_015509;NR_024260
12	8725381	8725418	3	cg01437161,cg19747195,cg02141084	_,_	_,_	_,_	_,_
12	10142803	10142841	2	cg02507181,cg13354523	5UTR;1stExon,5UTR;1stExon	_,_	CLEC1A;CLEC1A,CLEC1A;CLEC1A	NM_016511;NM_016511,NM_016511;NM_016511
12	12857151	12857298	3	cg14463304,cg06311804,cg21196265	TSS1500;TSS1500,TSS1500;TSS1500,TSS1500;TSS1500	N_Shore,N_Shore,N_Shore	DDX47;DDX47,DDX47;DDX47,DDX47;DDX47	NM_201224;NM_016355,NM_201224;NM_016355,NM_201224;NM_016355
12	16404162	16404261	2	cg00874480,cg15284911	Body;Body;Body;Body,Body;Body;Body;Body	_,_	MGST1;MGST1;MGST1;MGST1,MGST1;MGST1;MGST1;MGST1	NM_145792;NM_145791;NM_020300;NM_145764,NM_145792;NM_145791;NM_020300;NM_145764
12	16654056	16654414	2	cg05163329,cg03163184	_,_	_,_	_,_	_,_
12	19827878	19827930	2	cg07238058,cg16436164	_,_	_,_	_,_	_,_
12	25239519	25239528	2	cg00493755,cg22349126	1stExon;TSS200;TSS200;5UTR;TSS200,1stExon;TSS200;TSS200;5UTR;TSS200	Island,Island	LYRM5;CASC1;CASC1;LYRM5;CASC1,LYRM5;CASC1;CASC1;LYRM5;CASC1	NM_001001660;NM_001082973;NM_001082972;NM_001001660;NM_018272,NM_001001660;NM_001082973;NM_001082972;NM_001001660;NM_018272
12	29194451	29194486	2	cg07684519,cg06152945	_,_	S_Shore,S_Shore	_,_	_,_
12	29827753	29828455	2	cg13434308,cg13239483	5UTR,5UTR	Island,Island	TMTC1,TMTC1	NM_175861,NM_175861
12	30245224	30245930	3	cg14031402,cg06634914,cg03637696	_,_	Island,Island,S_Shore	_,_	_,_
12	34208836	34209382	2	cg25155766,cg11386866	_,_	N_Shelf,N_Shore	_,_	_,_
12	34422989	34423365	2	cg21268144,cg18920494	_,_	_,_	_,_	_,_
12	34439197	34439361	2	cg03307659,cg02770073	_,_	_,_	_,_	_,_
12	37824871	37825825	4	cg03562770,cg00896347,cg03468072,cg09571762	_,_	Island,Island,Island,S_Shore	_,_	_,_
12	39371553	39372168	2	cg25178439,cg09143195	TSS1500;TSS1500,TSS1500;TSS1500	N_Shore,N_Shore	CNTN1;CNTN1,CNTN1;CNTN1	NM_175038;NM_001843,NM_175038;NM_001843
12	40825085	40825779	3	cg22968445,cg17420585,cg01256987	TSS200;TSS200,TSS1500;TSS1500,TSS1500;TSS1500	Island,S_Shore,S_Shore	GXYLT1;GXYLT1,GXYLT1;GXYLT1,GXYLT1;GXYLT1	NM_173601;NM_001099650,NM_173601;NM_001099650,NM_173601;NM_001099650
12	45505893	45506359	12	cg15584813,cg04053798,cg11146691,cg17501823,cg21428710,cg22049899,cg07601320,cg11331445,cg14671384,cg18064171,cg07102229,cg04094478	5UTR;5UTR,1stExon;5UTR;1stExon;5UTR,1stExon;5UTR;1stExon;5UTR,TSS200;TSS200,TSS200;TSS200,TSS200;TSS200,TSS200;TSS200,TSS200;TSS200,TSS200;TSS200,TSS200;TSS200,TSS200;TSS200,TSS1500;TSS1500	_,_	SLC38A4;SLC38A4,SLC38A4;SLC38A4;SLC38A4;SLC38A4,SLC38A4;SLC38A4;SLC38A4;SLC38A4,SLC38A4;SLC38A4,SLC38A4;SLC38A4,SLC38A4;SLC38A4,SLC38A4;SLC38A4,SLC38A4;SLC38A4,SLC38A4;SLC38A4,SLC38A4;SLC38A4,SLC38A4;SLC38A4,SLC38A4;SLC38A4	NM_018018;NM_001143824,NM_018018;NM_018018;NM_001143824;NM_001143824,NM_018018;NM_018018;NM_001143824;NM_001143824,NM_001143824;NM_018018,NM_001143824;NM_018018,NM_001143824;NM_018018,NM_001143824;NM_018018,NM_001143824;NM_018018,NM_001143824;NM_018018,NM_001143824;NM_018018,NM_001143824;NM_018018,NM_018018;NM_001143824
12	45512246	45512720	6	cg09792000,cg08005660,cg12075247,cg12091498,cg07288557,cg08730239	_,_	S_Shore,S_Shore,S_Shore,S_Shore,S_Shore,S_Shore	_,_	_,_
12	46438471	46438782	5	cg21166775,cg06850996,cg20563854,cg14854517,cg09114799	1stExon;TSS200;5UTR;Body,1stExon;5UTR;TSS200;TSS200,1stExon;5UTR;TSS1500;TSS200,1stExon;5UTR;TSS1500;TSS200,1stExon;5UTR;TSS1500;TSS1500	N_Shore,N_Shore,N_Shore,N_Shore,N_Shore	RAPGEF3;RAPGEF3;RAPGEF3;RAPGEF3,RAPGEF3;RAPGEF3;RAPGEF3;RAPGEF3,RAPGEF3;RAPGEF3;RAPGEF3;RAPGEF3,RAPGEF3;RAPGEF3;RAPGEF3;RAPGEF3,RAPGEF3;RAPGEF3;RAPGEF3;RAPGEF3	NM_006105;NM_001098532;NM_006105;NM_001098531,NM_001098531;NM_001098531;NM_001098532;NM_006105,NM_001098531;NM_001098531;NM_001098532;NM_006105,NM_001098531;NM_001098531;NM_001098532;NM_006105,NM_001098531;NM_001098531;NM_006105;NM_001098532	hyper.chimp
12	12829428	12829692	3	cg07091544,cg10635645,cg16747828	Body;TSS1500,Body;TSS200,Body;TSS200	N_Shore,N_Shore,N_Shore	APOLD1;APOLD1,APOLD1;APOLD1,APOLD1;APOLD1	NM_001130415;NM_030817,NM_001130415;NM_030817,NM_001130415;NM_030817	hypo.chimp
12	12830981	12831657	2	cg10567273,cg05693982	Body;Body,Body;Body	Island,Island	APOLD1;APOLD1,APOLD1;APOLD1	NM_001130415;NM_030817,NM_001130415;NM_030817	hypo.chimp
12	21481572	21481899	2	cg21962791,cg13000219	TSS1500,1stExon;5UTR	N_Shore,Island	PYROXD1,PYROXD1;PYROXD1	NM_024854,NM_024854;NM_024854
12	21986597	21986744	2	cg06951626,cg26334627	_,_	Island,S_Shore	_,_	_,_
12	30867616	30868134	2	cg19795817,cg22243918	_,_	S_Shore,S_Shore	_,_	_,_
12	31703972	31704061	2	cg08647727,cg11649679	1stExon;5UTR;5UTR;5UTR,5UTR;5UTR;5UTR	_,_	C12orf72;C12orf72;C12orf72;C12orf72,C12orf72;C12orf72;C12orf72	NM_001135863;NM_173802;NM_001135864;NM_001135863,NM_173802;NM_001135864;NM_001135863
12	33482104	33482772	2	cg21043657,cg18232816	Body,Body	N_Shore,N_Shore	SYT10,SYT10	NM_198992,NM_198992
12	45759010	45759077	3	cg01354296,cg24458009,cg18893793	Body;Body,Body;Body,5UTR;5UTR	N_Shore,N_Shore,N_Shore	AMIGO2;AMIGO2,AMIGO2;AMIGO2,AMIGO2;AMIGO2	NM_001143668;NM_181847,NM_001143668;NM_181847,NM_181847;NM_001143668
12	47812307	47813045	2	cg13709639,cg14483935	TSS1500,TSS1500	S_Shore,S_Shore	TUBA1B,TUBA1B	NM_006082,NM_006082
12	48014417	48014510	2	cg03318924,cg12374506	Body,Body	N_Shore,N_Shore	C1QL4,C1QL4	NM_001008223,NM_001008223
12	48302196	48302760	3	cg20119464,cg13188416,cg06656027	TSS1500,TSS1500,TSS1500	N_Shore,N_Shore,N_Shore	PRPF40B,PRPF40B,PRPF40B	NM_012272,NM_012272,NM_012272
12	48583848	48583855	2	cg27188703,cg16115588	1stExon;5UTR,1stExon;5UTR	Island,Island	FAIM2;FAIM2,FAIM2;FAIM2	NM_012306;NM_012306,NM_012306;NM_012306
[truncated: 249,610 more chars]
