# Supplementary material for: A panel of induced pluripotent stem cells from chimpanzees: a resource for comparative functional genomics
Source: eLife journal article supplement (doi:10.7554/elife.07103), 2015-06-23
Supplement: supp [file elife-07103-supp-v1.zip › elife_poa_e07103_Supplementary_File_8.txt]

GO.ID	Term	Significant.genes.in.all.DMRs	Expected.genes.in.all.DMRs	fisher.P.Val.genes.in.all.DMRs	adj.P.Val.genes.in.all.DMRs	Significant.genes.in.promoter.DMRs	Expected.genes.in.promoter.DMRs	fisher.P.Val.genes.in.promoter.DMRs	adj.P.Val.genes.in.promoter.DMRs	Significant.genes.in.body.DMRs	Expected.genes.in.body.DMRs	classicFisher.genes.in.body.DMRs	BH.genes.in.body.DMRs	Significant.genes.in.mixed.DMRs	Expected.genes.in.mixed.DMRs	classicFisher.genes.in.mixed.DMRs	BH.genes.in.mixed.DMRs
GO:0007611	learning or memory	46	22.26	6.8e-07	0.00281778	13	8.23	0.06801	1	26	10.36	1.1e-05	0.00270346153846154	10	4.93	0.02571	1
GO:0050890	cognition	48	23.79	8.4e-07	0.00281778	14	8.78	0.05609	1	27	11.14	1.4e-05	0.003195	10	5.31	0.03992	1
GO:0044708	single-organism behavior	73	42.84	2.1e-06	0.0046963	22	15.61	0.0649	1	37	19.96	0.00019	0.0233480769230769	17	9.44	0.01369	1
GO:0007610	behavior	107	71.36	6.9e-06	0.011573025	31	26.71	0.21637	1	55	32.57	7.7e-05	0.011715	21	15.58	0.10026	1
GO:0043551	regulation of phosphatidylinositol 3-kin...	13	4.03	5.4e-05	0.0637355	1	1.4	0.76519	1	12	1.96	1.4e-07	0.0002955375	1	0.91	0.60496	1
GO:0044699	single-organism process	1405	1349.43	5.7e-05	0.0637355	499	498.16	0.48925	1	624	593.74	0.00108	0.069012	299	281.72	0.00604	1
GO:0050877	neurological system process	134	98.21	7e-05	0.06709	43	36.29	0.13701	1	65	43.14	5e-04	0.0431756756756757	31	20.93	0.01771	1
GO:0043550	regulation of lipid kinase activity	14	4.73	8.7e-05	0.072960375	2	1.71	0.51633	1	12	2.31	1.1e-06	0.00058575	1	1.1	0.67457	1
GO:0007267	cell-cell signaling	182	141.47	0.00012	0.087217	51	53.49	0.66526	1	104	63.94	2.6e-07	0.0002955375	33	31.09	0.38469	1
GO:0044707	single-multicellular organism process	722	653.92	0.00013	0.087217	232	242.49	0.8262	1	352	289.87	7.6e-07	0.0004473	148	138.42	0.1538	1
GO:0043552	positive regulation of phosphatidylinosi...	11	3.34	0.00016	0.0975854545454545	1	1.16	0.69783	1	10	1.61	1.3e-06	0.000593357142857143	1	0.76	0.53875	1
GO:0032501	multicellular organismal process	739	673.95	0.00026	0.129387857142857	238	249.63	0.84896	1	357	298.62	3.4e-06	0.001278	152	142.36	0.15331	1
GO:0090218	positive regulation of lipid kinase acti...	11	3.48	0.00025	0.129387857142857	1	1.22	0.71629	1	10	1.68	2.1e-06	0.0008946	1	0.8	0.55627	1
GO:2000727	positive regulation of cardiac muscle ce...	5	0.83	0.00027	0.129387857142857	NA	NA	NA	NA	4	0.42	0.00032	0.0334714285714286	0	0.19	1	1
GO:0007399	nervous system development	273	227.29	0.00032	0.142072941176471	82	85.26	0.67123	1	155	106.66	3.5e-07	0.0002955375	42	51.18	0.93566	1
GO:0048856	anatomical structure development	573	512.87	0.00035	0.142072941176471	188	191.51	0.63931	1	292	231.25	4.9e-07	0.0003479	106	111.12	0.74464	1
GO:0050896	response to stimulus	867	802.76	0.00036	0.142072941176471	296	297.75	0.57456	1	395	352.69	0.00063	0.05032125	191	168.48	0.00756	1
GO:0044763	single-organism cellular process	1274	1218.95	0.00044	0.163997777777778	459	451.5	0.25268	1	560	538.2	0.02899	0.365538188976378	270	256.24	0.04402	1
GO:0003008	system process	203	164.42	0.00049	0.1643705	66	61.42	0.28159	1	94	71.85	0.00345	0.128908092485549	46	35.22	0.03461	1
GO:0007268	synaptic transmission	117	87.63	0.00049	0.1643705	28	33.67	0.8721	1	72	40.9	1.3e-06	0.000593357142857143	20	20.13	0.54628	1
GO:0032502	developmental process	633	573.93	0.00059	0.179923181818182	204	213.89	0.81854	1	314	258.14	5.4e-06	0.0017253	125	123.82	0.46695	1
GO:0051179	localization	598	539.72	0.00058	0.179923181818182	202	201.57	0.50069	1	293	240.49	1.3e-05	0.00307666666666667	121	115.14	0.26464	1
GO:0001662	behavioral fear response	10	3.34	8e-04	0.198785185185185	6	1.28	0.00124	1	3	1.61	0.21542	0.786590742857143	3	0.87	0.05458	1
GO:0002209	behavioral defense response	10	3.34	8e-04	0.198785185185185	6	1.28	0.00124	1	3	1.61	0.21542	0.786590742857143	3	0.87	0.05458	1
GO:0030182	neuron differentiation	170	135.76	0.00075	0.198785185185185	44	50.56	0.85847	1	106	64.99	1.7e-07	0.0002955375	25	30.78	0.88953	1
GO:0042596	fear response	11	3.89	8e-04	0.198785185185185	7	1.52	0.00055	1	3	1.89	0.29254	0.861801018600531	3	1.02	0.0808	1
GO:0048525	negative regulation of viral process	17	7.51	0.00072	0.198785185185185	10	2.99	0.00062	1	6	3.08	0.08444	0.543922983870968	1	1.48	0.77921	1
GO:0044767	single-organism developmental process	625	568.37	0.00092	0.205742666666667	200	211.69	0.85809	1	311	255.48	5.8e-06	0.00176485714285714	123	122.53	0.49937	1
GO:0048666	neuron development	139	108.5	0.00091	0.205742666666667	31	40.01	0.94992	1	91	52.24	7.3e-08	0.0002955375	22	24.53	0.7358	1
GO:0070838	divalent metal ion transport	54	35.47	0.00088	0.205742666666667	14	13.3	0.46071	1	31	15.76	0.00021	0.02485	11	7.7	0.14859	1
GO:0006810	transport	478	427.18	0.00126	0.214688	166	159.24	0.27429	1	230	189.23	0.00026	0.0286448275862069	101	90.76	0.11273	1
GO:0006816	calcium ion transport	52	34.36	0.00124	0.214688	13	12.81	0.51936	1	30	15.27	0.00027	0.0292423728813559	11	7.43	0.1253	1
GO:0007129	synapsis	10	3.48	0.00117	0.214688	2	1.28	0.36953	1	4	1.4	0.04703	0.436804796511628	4	0.68	0.00407	1
GO:0007275	multicellular organismal development	561	506.61	0.00104	0.214688	173	189.07	0.93377	1	291	228.73	2.5e-07	0.0002955375	108	109.56	0.59393	1
GO:0022008	neurogenesis	190	155.52	0.00127	0.214688	53	58.06	0.78399	1	116	74.09	3.7e-07	0.0002955375	27	35.41	0.95087	1
GO:0030154	cell differentiation	406	357.91	0.00123	0.214688	125	133.38	0.81509	1	213	162.97	4.4e-06	0.00147978947368421	74	78.02	0.72134	1
GO:0048468	cell development	240	201	0.00109	0.214688	69	75.08	0.79747	1	136	94.47	3.7e-06	0.0013135	43	45.3	0.67047	1
GO:0048731	system development	493	440.81	0.00106	0.214688	157	164.24	0.76634	1	259	199.1	2.8e-07	0.0002955375	89	95.31	0.79808	1
GO:0048869	cellular developmental process	428	378.64	0.00114	0.214688	138	141.62	0.65582	1	218	172.21	3.1e-05	0.00600272727272727	79	82.8	0.70748	1
GO:0072511	divalent inorganic cation transport	54	36.03	0.00128	0.214688	14	13.48	0.48158	1	31	15.9	0.00025	0.0280263157894737	11	7.77	0.15564	1
GO:0007612	learning	25	13.49	0.00135	0.220906097560976	8	5	0.12595	1	17	6.37	0.00017	0.0213	3	3	0.58097	1
GO:0006812	cation transport	120	92.78	0.00142	0.221553023255814	30	35.07	0.84146	1	61	40.62	0.00081	0.056878021978022	33	19.9	0.0028	1
GO:0006936	muscle contraction	54	36.17	0.0014	0.221553023255814	18	13.66	0.14004	1	27	16.6	0.00826	0.212828225806452	10	8.19	0.30371	1
GO:0051234	establishment of localization	486	435.81	0.00151	0.230240681818182	170	162.54	0.25393	1	233	193.22	0.00038	0.0357088235294118	102	92.66	0.13665	1
GO:0071705	nitrogen compound transport	95	71.08	0.00156	0.232578666666667	33	26.47	0.1103	1	38	31.65	0.13616	0.664169770992366	25	15.28	0.01038	1
GO:0006140	regulation of nucleotide metabolic proce...	81	59.26	0.00177	0.241524	32	21.96	0.02015	1	39	26.89	0.01185	0.246118064516129	13	13.16	0.55873	1
GO:0006811	ion transport	174	141.88	0.00173	0.241524	52	52.82	0.57072	1	86	62.26	0.00108	0.069012	45	30.25	0.00426	1
GO:0006950	response to stress	415	368.34	0.0018	0.241524	154	137.71	0.05852	1	183	161.15	0.02509	0.341702542372881	91	77.83	0.04969	1
GO:0043089	positive regulation of Cdc42 GTPase acti...	4	0.7	0.00166	0.241524	NA	NA	NA	NA	NA	NA	NA	NA	NA	NA	NA	NA
GO:0043901	negative regulation of multi-organism pr...	22	11.55	0.00174	0.241524	12	4.57	0.0018	1	7	4.69	0.18711	0.748674326862868	3	2.27	0.39885	1
GO:0003012	muscle system process	60	41.87	0.0022	0.24844265625	18	15.67	0.30498	1	31	19.05	0.00484	0.159420618556701	12	9.44	0.23601	1
GO:0023052	signaling	648	595.91	0.00228	0.24844265625	212	224.13	0.86364	1	322	266.97	8.1e-06	0.00209592	127	129.16	0.61754	1
GO:0030001	metal ion transport	99	75.53	0.00237	0.24844265625	25	28.54	0.78542	1	52	33.34	0.00083	0.0576489130434783	26	16.38	0.01304	1
GO:0042221	response to chemical	414	367.92	0.00202	0.24844265625	126	136.92	0.8743	1	202	163.81	0.00034	0.033946875	91	78.97	0.06736	1
GO:0043467	regulation of generation of precursor me...	15	6.82	0.002	0.24844265625	5	2.44	0.09408	1	8	3.29	0.01532	0.277322379603399	3	1.52	0.19258	1
GO:0044700	single organism signaling	648	595.91	0.00228	0.24844265625	212	224.13	0.86364	1	322	266.97	8.1e-06	0.00209592	127	129.16	0.61754	1
GO:0044765	single-organism transport	405	359.58	0.00214	0.24844265625	134	134.66	0.54346	1	192	158.69	0.00135	0.0775538461538462	93	76.73	0.02018	1
GO:0048585	negative regulation of response to stimu...	144	115.32	0.00212	0.24844265625	48	43.61	0.25992	1	69	53.08	0.01347	0.263298795180723	30	25.93	0.22496	1
GO:0048699	generation of neurons	179	147.17	0.00216	0.24844265625	50	54.77	0.77727	1	110	70.24	7.7e-07	0.0004473	25	33.44	0.95603	1
GO:0051093	negative regulation of developmental pro...	96	72.89	0.00235	0.24844265625	28	27.99	0.52876	1	49	33.27	0.00382	0.13411978021978	21	16.42	0.14647	1
GO:0072593	reactive oxygen species metabolic proces...	26	14.61	0.00204	0.24844265625	7	5.37	0.28953	1	14	6.58	0.00559	0.170881900452489	4	3.11	0.37764	1
GO:1900542	regulation of purine nucleotide metaboli...	80	58.84	0.00219	0.24844265625	31	21.77	0.02921	1	39	26.68	0.0105	0.236475	13	13.04	0.54586	1
GO:1902105	regulation of leukocyte differentiation	37	23.09	0.00213	0.24844265625	8	8.66	0.64295	1	20	9.66	0.00145	0.078521186440678	10	4.66	0.01823	1
GO:2000725	regulation of cardiac muscle cell differ...	7	2.09	0.0023	0.24844265625	2	0.79	0.18605	1	5	0.98	0.00195	0.096593023255814	0	0.49	1	1
GO:0006110	regulation of glycolysis	8	2.64	0.00249	0.257006307692308	1	0.98	0.63492	1	5	1.26	0.00661	0.182848051948052	3	0.64	0.02474	1
GO:0006887	exocytosis	54	37.14	0.00258	0.262260909090909	10	13.84	0.89325	1	33	16.6	0.00011	0.01464375	14	7.92	0.02767	1
GO:0033555	multicellular organismal response to str...	17	8.35	0.00262	0.262351940298507	9	3.42	0.00634	1	5	3.99	0.36939	0.896399366420275	4	2.16	0.16928	1
GO:0006928	cellular component movement	222	187.79	0.00283	0.279212794117647	67	71.17	0.72548	1	122	86.42	3.3e-05	0.00602485714285714	40	41.89	0.65011	1
GO:0010939	regulation of necrotic cell death	6	1.67	0.00313	0.295762957746479	4	0.73	0.00457	1	0	0.7	1	1	1	0.38	0.3207	1
GO:0017156	calcium ion-dependent exocytosis	15	7.09	0.00308	0.295762957746479	4	2.62	0.26598	1	11	3.01	0.00013	0.016614	1	1.44	0.77047	1
GO:0048148	behavioral response to cocaine	6	1.67	0.00313	0.295762957746479	2	0.55	0.10055	1	3	0.84	0.04675	0.436804796511628	2	0.38	0.05273	1
GO:0007154	cell communication	654	603.84	0.00322	0.295931232876712	215	226.88	0.85808	1	323	270.68	2.2e-05	0.00453483870967742	129	130.87	0.6045	1
GO:0097028	dendritic cell differentiation	10	3.89	0.00318	0.295931232876712	2	1.4	0.4136	1	7	1.75	0.00126	0.0752467289719626	0	0.83	1	1
GO:0009987	cellular process	1514	1483.24	0.00334	0.302811621621622	559	548.6	0.07875	1	661	655.3	0.24955	0.846065015479876	317	311.14	0.15059	1
GO:0030325	adrenal gland development	9	3.34	0.00348	0.307201578947368	1	1.28	0.73363	1	7	1.47	0.00039	0.0361173913043478	0	0.68	1	1
GO:0045909	positive regulation of vasodilation	9	3.34	0.00348	0.307201578947368	4	1.1	0.02112	1	5	1.47	0.01319	0.261751863354037	0	0.68	1	1
GO:0002703	regulation of leukocyte mediated immunit...	23	12.94	0.00365	0.313946794871795	8	5	0.12595	1	16	5.25	4.9e-05	0.00846243243243243	3	2.58	0.47937	1
GO:0051239	regulation of multicellular organismal p...	274	237.45	0.00361	0.313946794871795	91	89.41	0.44402	1	143	106.8	9e-05	0.0130704545454545	47	51.94	0.79688	1
GO:0007166	cell surface receptor signaling pathway	345	305.05	0.00384	0.31417756097561	108	114.54	0.77307	1	180	137.54	3.2e-05	0.00601411764705882	64	66.38	0.65199	1
GO:0051129	negative regulation of cellular componen...	67	48.82	0.00383	0.31417756097561	22	18.54	0.23066	1	39	22.48	5e-04	0.0431756756756757	8	11.03	0.86796	1
GO:0070509	calcium ion import	11	4.59	0.00373	0.31417756097561	3	1.77	0.25882	1	6	1.89	0.0096	0.229707434944238	2	0.95	0.24457	1
GO:2000377	regulation of reactive oxygen species me...	15	7.23	0.00379	0.31417756097561	5	2.56	0.11039	1	7	3.22	0.03942	0.423444	2	1.52	0.45135	1
GO:0006007	glucose catabolic process	18	9.46	0.00446	0.340024318181818	2	3.23	0.84256	1	9	4.34	0.02771	0.359892073170732	8	2.09	0.00101	1
GO:0035630	bone mineralization involved in bone mat...	4	0.83	0.00443	0.340024318181818	1	0.37	0.31454	1	1	0.35	0.30449	0.861801018600531	2	0.23	0.01943	1
GO:0045820	negative regulation of glycolysis	4	0.83	0.00443	0.340024318181818	0	0.37	1	1	3	0.42	0.00583	0.170881900452489	1	0.23	0.20702	1
GO:0060406	positive regulation of penile erection	4	0.83	0.00443	0.340024318181818	NA	NA	NA	NA	3	0.42	0.00583	0.170881900452489	NA	NA	NA	NA
GO:0060453	regulation of gastric acid secretion	4	0.83	0.00443	0.340024318181818	1	0.3	0.27	1	2	0.42	0.06082	0.484588279301746	1	0.19	0.17576	1
GO:0070192	chromosome organization involved in meio...	10	4.03	0.00426	0.340024318181818	2	1.4	0.4136	1	4	1.61	0.07295	0.524353768278965	4	0.8	0.00728	1
GO:1902106	negative regulation of leukocyte differe...	15	7.37	0.00462	0.348264943820225	4	2.93	0.33585	1	9	2.94	0.00211	0.103410687022901	3	1.48	0.18291	1
GO:0009605	response to external stimulus	250	216.03	0.00474	0.353340666666667	84	80.26	0.34035	1	120	94.19	0.00241	0.109672340425532	51	45.23	0.19408	1
GO:0042312	regulation of vasodilation	11	4.73	0.00483	0.356093076923077	5	1.71	0.02536	1	6	2.03	0.01368	0.263298795180723	0	0.99	1	1
GO:0009914	hormone transport	46	31.58	0.00494	0.360244130434783	16	11.95	0.14314	1	22	14.36	0.02963	0.371246470588235	8	7.13	0.42075	1
GO:0019722	calcium-mediated signaling	22	12.52	0.00512	0.36060875	8	4.88	0.1135	1	12	5.25	0.00559	0.170881900452489	5	2.81	0.14873	1
GO:0042391	regulation of membrane potential	58	41.73	0.00516	0.36060875	16	16.04	0.54183	1	35	19.26	0.00041	0.0374271428571429	8	9.55	0.7456	1
GO:0042772	DNA damage response, signal transduction...	6	1.81	0.00513	0.36060875	2	0.49	0.0814	1	3	0.84	0.04675	0.436804796511628	1	0.34	0.2939	1
GO:0071310	cellular response to organic substance	228	195.72	0.00512	0.36060875	74	73.37	0.48763	1	108	87.75	0.01128	0.244336271186441	52	43.03	0.08205	1
GO:0030826	regulation of cGMP biosynthetic process	7	2.36	0.0054	0.373490721649485	1	0.73	0.53026	1	6	1.05	0.00033	0.0334714285714286	1	0.49	0.39515	1
GO:0009628	response to abiotic stimulus	134	109.19	0.0056	0.375704	46	40.86	0.2166	1	61	49.23	0.04537	0.436804796511628	31	23.92	0.08119	1
GO:0046580	negative regulation of Ras protein signa...	10	4.17	0.0056	0.375704	1	1.59	0.80568	1	6	1.96	0.01151	0.244633663366337	3	1.02	0.0808	1
GO:0050848	regulation of calcium-mediated signaling	10	4.17	0.0056	0.375704	4	1.59	0.07046	1	4	1.54	0.06364	0.492865496368039	3	0.8	0.04331	1
GO:0001101	response to acid	47	32.97	0.00688	0.403056076923077	15	12.56	0.27509	1	25	14.64	0.0059	0.170881900452489	9	7.2	0.29444	1
GO:0002521	leukocyte differentiation	61	45.07	0.00761	0.403056076923077	14	16.71	0.79127	1	32	19.4	0.00345	0.128908092485549	17	9.55	0.01526	1
GO:0002697	regulation of immune effector process	42	28.65	0.00628	0.403056076923077	13	11.04	0.31111	1	24	12.26	0.00114	0.0714176470588235	9	5.91	0.1381	1
GO:0006029	proteoglycan metabolic process	20	11.27	0.00657	0.403056076923077	8	4.09	0.05007	1	7	5.11	0.24894	0.846065015479876	6	2.43	0.03368	1
GO:0006091	generation of precursor metabolites and ...	62	45.9	0.00751	0.403056076923077	23	17.08	0.08875	1	23	20.38	0.30232	0.861801018600531	16	10.12	0.04708	1
GO:0007131	reciprocal meiotic recombination	10	4.31	0.00726	0.403056076923077	3	1.46	0.17757	1	3	1.96	0.31219	0.863907003891051	4	0.91	0.01183	1
GO:0007186	G-protein coupled receptor signaling pat...	96	75.53	0.00679	0.403056076923077	26	28.6	0.72471	1	49	32.85	0.00297	0.121846583850932	18	16	0.33629	1
GO:0007218	neuropeptide signaling pathway	21	12.1	0.00716	0.403056076923077	10	4.57	0.01519	1	7	5.11	0.24894	0.846065015479876	4	2.54	0.24865	1
GO:0010033	response to organic substance	301	265.68	0.0065	0.403056076923077	96	99.41	0.66773	1	145	118.64	0.00419	0.141661904761905	69	57.78	0.05967	1
GO:0019320	hexose catabolic process	20	11.27	0.00657	0.403056076923077	3	3.78	0.73807	1	10	5.18	0.03277	0.389625551470588	8	2.39	0.00247	1
GO:0023061	signal release	59	43.4	0.0078	0.403056076923077	19	16.71	0.31357	1	29	20.1	0.02905	0.365538188976378	12	10.05	0.30466	1
GO:0030029	actin filament-based process	86	66.63	0.00673	0.403056076923077	20	24.58	0.86119	1	51	30.81	0.00023	0.0262446428571429	21	14.75	0.06467	1
GO:0030279	negative regulation of ossification	9	3.62	0.00641	0.403056076923077	3	1.28	0.13296	1	5	1.68	0.02316	0.328872	2	0.8	0.18823	1
GO:0032101	regulation of response to external stimu...	85	66.07	0.00766	0.403056076923077	26	25.07	0.45251	1	38	28.57	0.04277	0.423721395348837	23	14.14	0.0146	1
GO:0035825	reciprocal DNA recombination	10	4.31	0.00726	0.403056076923077	3	1.46	0.17757	1	3	1.96	0.31219	0.863907003891051	4	0.91	0.01183	1
GO:0040011	locomotion	196	167.34	0.00744	0.403056076923077	58	63.31	0.78521	1	109	76.48	6.3e-05	0.0103223076923077	33	37	0.78561	1
GO:0043207	response to external biotic stimulus	92	72.05	0.00701	0.403056076923077	36	26.59	0.03844	1	40	29.34	0.02741	0.358179754601227	15	13.84	0.41155	1
GO:0043255	regulation of carbohydrate biosynthetic ...	16	8.49	0.00781	0.403056076923077	4	3.29	0.42035	1	9	3.85	0.01339	0.263298795180723	4	1.97	0.13361	1
GO:0045596	negative regulation of cell differentiat...	78	59.67	0.00699	0.403056076923077	24	23.11	0.45473	1	42	27.17	0.00305	0.121846583850932	14	13.57	0.49202	1
GO:0046851	negative regulation of bone remodeling	5	1.39	0.0071	0.403056076923077	4	0.61	0.00214	1	1	0.7	0.51635	0.963069614711033	0	0.38	1	1
GO:0046879	hormone secretion	45	31.3	0.00689	0.403056076923077	16	11.95	0.14314	1	21	14.22	0.04627	0.436804796511628	8	7.09	0.41493	1
GO:0048583	regulation of response to stimulus	368	330.23	0.00717	0.403056076923077	118	122.83	0.70864	1	184	148.12	0.00048	0.0426	77	70.97	0.22452	1
GO:0048705	skeletal system morphogenesis	38	25.59	0.00729	0.403056076923077	11	9.45	0.34611	1	25	12.33	0.00054	0.0442384615384615	5	5.99	0.72112	1
GO:0051058	negative regulation of small GTPase medi...	10	4.31	0.00726	0.403056076923077	1	1.65	0.81756	1	6	2.03	0.01368	0.263298795180723	3	1.06	0.08807	1
GO:0051248	negative regulation of protein metabolic...	82	63.43	0.00769	0.403056076923077	29	24.09	0.17106	1	47	29.9	0.00125	0.0752467289719626	12	14.48	0.78928	1
GO:0051707	response to other organism	92	72.05	0.00701	0.403056076923077	36	26.59	0.03844	1	40	29.34	0.02741	0.358179754601227	15	13.84	0.41155	1
GO:0060079	regulation of excitatory postsynaptic me...	11	5.01	0.0078	0.403056076923077	2	1.71	0.51633	1	9	2.45	0.00052	0.0439831168831169	1	1.14	0.68694	1
GO:0060337	type I interferon signaling pathway	16	8.49	0.00781	0.403056076923077	8	3.42	0.01944	1	7	3.99	0.10159	0.586780035492458	1	2.05	0.87672	1
GO:0070482	response to oxygen levels	45	31.3	0.00689	0.403056076923077	20	11.89	0.01544	1	20	14.78	0.1024	0.586780035492458	9	7.32	0.31016	1
GO:0070887	cellular response to chemical stimulus	276	242.59	0.00744	0.403056076923077	88	90.39	0.6288	1	128	107.36	0.01592	0.282210410958904	62	52.2	0.0793	1
GO:0008306	associative learning	15	7.79	0.00802	0.404557744360902	6	2.93	0.07003	1	10	3.64	0.00286	0.120232894736842	1	1.71	0.8251	1
GO:0035455	response to interferon-alpha	6	1.95	0.00793	0.404557744360902	3	0.79	0.0408	1	2	0.84	0.20341	0.761446924428822	0	0.42	1	1
GO:2000736	regulation of stem cell differentiation	19	10.71	0.008	0.404557744360902	6	4.03	0.21333	1	12	5.11	0.00447	0.150333157894737	1	2.5	0.92271	1
GO:0030168	platelet activation	41	28.24	0.0081	0.405544029850746	4	10.67	0.99504	1	24	12.89	0.00227	0.106656617647059	13	6.33	0.01086	1
GO:0007127	meiosis I	16	8.62	0.0092	0.408760264900662	6	3.11	0.08844	1	5	3.85	0.34096	0.874768965517241	5	1.82	0.03434	1
GO:0007613	memory	17	9.32	0.00882	0.408760264900662	4	3.66	0.50208	1	11	4.27	0.00306	0.121846583850932	3	2.09	0.34681	1
GO:0010959	regulation of metal ion transport	40	27.54	0.0088	0.408760264900662	14	10.67	0.18108	1	19	12.4	0.04104	0.423710747663551	9	6.37	0.18763	1
GO:0014832	urinary bladder smooth muscle contractio...	4	0.97	0.00919	0.408760264900662	0	0.43	1	1	3	0.49	0.00967	0.229707434944238	1	0.27	0.2371	1
GO:0015833	peptide transport	41	28.38	0.00882	0.408760264900662	17	10.8	0.04194	1	17	13.03	0.15648	0.698259217877095	7	6.44	0.46677	1
GO:0033689	negative regulation of osteoblast prolif...	4	0.97	0.00919	0.408760264900662	2	0.43	0.06356	1	1	0.49	0.39854	0.896399366420275	1	0.27	0.2371	1
GO:0043457	regulation of cellular respiration	4	0.97	0.00919	0.408760264900662	NA	NA	NA	NA	4	0.49	7e-04	0.0545487804878049	NA	NA	NA	NA
GO:0044724	single-organism carbohydrate catabolic p...	26	16.14	0.00841	0.408760264900662	6	5.67	0.50436	1	12	7.07	0.04926	0.450316738197425	9	3.45	0.0074	1
GO:0046365	monosaccharide catabolic process	20	11.55	0.00871	0.408760264900662	3	3.9	0.75747	1	10	5.32	0.03847	0.415242060810811	8	2.46	0.00301	1
GO:0046597	negative regulation of viral entry into ...	4	0.97	0.00919	0.408760264900662	2	0.43	0.06356	1	2	0.42	0.06082	0.484588279301746	0	0.23	1	1
GO:0046903	secretion	128	105.3	0.00914	0.408760264900662	35	40.01	0.82314	1	65	46.57	0.00346	0.128908092485549	33	22.48	0.01654	1
GO:0051272	positive regulation of cellular componen...	47	33.38	0.0087	0.408760264900662	14	12.69	0.39086	1	25	14.92	0.00749	0.201365546218487	10	7.35	0.2016	1
GO:0051924	regulation of calcium ion transport	30	19.34	0.00857	0.408760264900662	11	7.56	0.13504	1	16	8.54	0.01091	0.239187328767123	5	4.4	0.4503	1
GO:0071357	cellular response to type I interferon	16	8.62	0.0092	0.408760264900662	8	3.48	0.02145	1	7	3.99	0.10159	0.586780035492458	1	2.05	0.87672	1
GO:0072102	glomerulus morphogenesis	4	0.97	0.00919	0.408760264900662	0	0.37	1	1	4	0.49	7e-04	0.0545487804878049	0	0.27	1	1
GO:0090244	Wnt signaling pathway involved in somito...	4	0.97	0.00919	0.408760264900662	1	0.43	0.35637	1	3	0.49	0.00967	0.229707434944238	0	0.27	1	1
GO:2000379	positive regulation of reactive oxygen s...	9	3.76	0.00845	0.408760264900662	4	1.28	0.03577	1	4	1.75	0.09349	0.575530924855491	1	0.8	0.55627	1
GO:0031175	neuron projection development	116	94.45	0.00934	0.410432941176471	27	34.64	0.93341	1	77	45.73	3.1e-06	0.0012380625	14	21.34	0.96937	1
GO:0032940	secretion by cell	114	92.64	0.00936	0.410432941176471	31	34.95	0.78561	1	60	41.11	0.00178	0.0909936	27	19.71	0.05905	1
GO:0030335	positive regulation of cell migration	45	31.85	0.00949	0.413431233766234	13	12.08	0.43296	1	25	14.15	0.00379	0.13411978021978	9	6.98	0.26368	1
GO:0006801	superoxide metabolic process	11	5.15	0.00973	0.414853987341772	2	1.77	0.5354	1	7	2.38	0.00816	0.212396356275304	2	1.06	0.28727	1
GO:0031644	regulation of neurological system proces...	11	5.15	0.00973	0.414853987341772	4	2.01	0.13906	1	4	2.17	0.16865	0.723270805369127	3	1.1	0.0956	1
GO:0034097	response to cytokine	84	65.8	0.00971	0.414853987341772	36	25.19	0.01883	1	29	28.29	0.47312	0.943680638297872	19	14.22	0.12068	1
GO:0050654	chondroitin sulfate proteoglycan metabol...	14	7.23	0.00977	0.414853987341772	6	2.56	0.04052	1	5	3.43	0.2574	0.847391035548686	4	1.63	0.07878	1
GO:0007631	feeding behavior	20	11.68	0.00998	0.415874658385093	8	4.39	0.07083	1	8	4.97	0.12205	0.637799060297572	2	2.35	0.6875	1
GO:0043269	regulation of ion transport	56	41.31	0.00993	0.415874658385093	21	15.49	0.09549	1	26	18.63	0.05227	0.472426166902404	11	9.17	0.31149	1
GO:0051899	membrane depolarization	20	11.68	0.00998	0.415874658385093	4	4.09	0.59043	1	14	5.67	0.00136	0.0775538461538462	3	2.54	0.46956	1
GO:0016337	cell-cell adhesion	67	51.05	0.01078	0.424644797687861	16	18.6	0.77015	1	38	23.18	0.00169	0.0877975609756098	14	10.77	0.19048	1
GO:0030808	regulation of nucleotide biosynthetic pr...	24	14.88	0.01095	0.424644797687861	12	5.55	0.00899	1	11	6.65	0.06752	0.511713547646384	3	3.37	0.66173	1
GO:0031348	negative regulation of defense response	21	12.52	0.01066	0.424644797687861	10	4.82	0.02127	1	9	5.53	0.09984	0.586780035492458	4	2.84	0.31683	1
GO:0031641	regulation of myelination	7	2.64	0.01087	0.424644797687861	4	1.1	0.02112	1	2	1.12	0.30998	0.863834365460096	0	0.57	1	1
GO:0032897	negative regulation of viral transcripti...	7	2.64	0.01087	0.424644797687861	4	0.98	0.01384	1	2	0.98	0.2566	0.846065015479876	0	0.42	1	1
GO:0034340	response to type I interferon	16	8.76	0.01078	0.424644797687861	8	3.54	0.0236	1	7	4.06	0.10897	0.606021148825065	1	2.09	0.88142	1
GO:0044766	multi-organism transport	9	3.89	0.01095	0.424644797687861	5	1.34	0.00918	1	4	1.75	0.09349	0.575530924855491	1	0.76	0.53875	1
GO:0046794	transport of virus	9	3.89	0.01095	0.424644797687861	5	1.34	0.00918	1	4	1.75	0.09349	0.575530924855491	1	0.76	0.53875	1
GO:0050869	negative regulation of B cell activation	7	2.64	0.01087	0.424644797687861	3	1.04	0.0811	1	2	0.98	0.2566	0.846065015479876	2	0.53	0.09662	1
GO:0075733	intracellular transport of virus	9	3.89	0.01095	0.424644797687861	5	1.34	0.00918	1	4	1.75	0.09349	0.575530924855491	1	0.76	0.53875	1
GO:1900371	regulation of purine nucleotide biosynth...	24	14.88	0.01095	0.424644797687861	12	5.55	0.00899	1	11	6.65	0.06752	0.511713547646384	3	3.37	0.66173	1
GO:1902583	multi-organism intracellular transport	9	3.89	0.01095	0.424644797687861	5	1.34	0.00918	1	4	1.75	0.09349	0.575530924855491	1	0.76	0.53875	1
GO:0002683	negative regulation of immune system pro...	35	23.79	0.01117	0.428202841530055	14	8.97	0.06443	1	16	10.22	0.04915	0.449954871060172	7	4.93	0.22323	1
GO:0009607	response to biotic stimulus	94	75.12	0.01117	0.428202841530055	38	27.51	0.02599	1	40	30.53	0.0468	0.436804796511628	15	14.33	0.46589	1
GO:0030207	chondroitin sulfate catabolic process	5	1.53	0.01154	0.428202841530055	3	0.55	0.01437	1	1	0.63	0.47989	0.943680638297872	2	0.34	0.04325	1
GO:0030208	dermatan sulfate biosynthetic process	5	1.53	0.01154	0.428202841530055	2	0.55	0.10055	1	2	0.77	0.1773	0.729988043478261	2	0.42	0.06287	1
GO:0032102	negative regulation of response to exter...	30	19.75	0.0116	0.428202841530055	12	7.62	0.07882	1	11	8.89	0.27582	0.861801018600531	8	4.51	0.08218	1
GO:0033137	negative regulation of peptidyl-serine p...	6	2.09	0.01168	0.428202841530055	3	0.85	0.04965	1	3	0.98	0.06975	0.511713547646384	1	0.53	0.41811	1
GO:0034104	negative regulation of tissue remodeling	5	1.53	0.01154	0.428202841530055	4	0.61	0.00214	1	1	0.77	0.55025	0.987402461538462	0	0.38	1	1
GO:0043931	ossification involved in bone maturation	5	1.53	0.01154	0.428202841530055	1	0.49	0.39565	1	2	0.7	0.15178	0.692272805139186	2	0.3	0.03449	1
GO:0046596	regulation of viral entry into host cell	5	1.53	0.01154	0.428202841530055	3	0.67	0.02577	1	2	0.63	0.12709	0.637799060297572	0	0.34	1	1
GO:0071470	cellular response to osmotic stress	6	2.09	0.01168	0.428202841530055	3	0.85	0.04965	1	0	0.84	1	1	2	0.49	0.08488	1
GO:0010817	regulation of hormone levels	64	48.69	0.01207	0.438058235294118	20	17.75	0.32161	1	33	21.29	0.00777	0.20687625	11	10.2	0.44251	1
GO:0042886	amide transport	41	28.93	0.01221	0.438058235294118	17	10.98	0.0479	1	17	13.17	0.1669	0.723270805369127	7	6.52	0.47907	1
GO:0050793	regulation of developmental process	228	199.47	0.01216	0.438058235294118	71	75.93	0.75181	1	120	90.41	0.00053	0.0439831168831169	40	44.32	0.78347	1
GO:1901700	response to oxygen-containing compound	167	142.3	0.01221	0.438058235294118	51	52.94	0.6354	1	84	63.31	0.00389	0.135092934782609	38	30.75	0.099	1
GO:0002252	immune effector process	80	62.87	0.01237	0.439102275132275	28	24.21	0.23629	1	39	26.75	0.01093	0.239187328767123	17	12.97	0.15359	1
GO:0002682	regulation of immune system process	150	126.58	0.01237	0.439102275132275	45	47.63	0.6819	1	79	54.63	0.00045	0.0405	30	26.54	0.26529	1
GO:0009653	anatomical structure morphogenesis	299	267.08	0.01252	0.442087789473684	92	99.96	0.8301	1	168	123.47	6.8e-06	0.00197509090909091	49	59.71	0.95103	1
GO:0030799	regulation of cyclic nucleotide metaboli...	25	15.86	0.0127	0.443001494845361	11	5.98	0.03588	1	10	7.07	0.16862	0.723270805369127	6	3.6	0.15128	1
GO:0043470	regulation of carbohydrate catabolic pro...	8	3.34	0.01281	0.443001494845361	1	1.22	0.71629	1	5	1.61	0.01942	0.305212776412776	3	0.8	0.04331	1
GO:0043471	regulation of cellular carbohydrate cata...	8	3.34	0.01281	0.443001494845361	1	1.22	0.71629	1	5	1.61	0.01942	0.305212776412776	3	0.8	0.04331	1
GO:0043547	positive regulation of GTPase activity	30	19.89	0.01278	0.443001494845361	8	6.89	0.38445	1	17	9.03	0.00845	0.213673517786561	5	4.28	0.42782	1
GO:0019932	second-messenger-mediated signaling	32	21.56	0.01308	0.44658898989899	9	7.93	0.39699	1	18	9.52	0.00655	0.182848051948052	8	4.89	0.11657	1
GO:0044057	regulation of system process	59	44.51	0.01314	0.44658898989899	21	17.08	0.19032	1	31	20.17	0.01087	0.239187328767123	9	10.27	0.70554	1
GO:0051607	defense response to virus	33	22.4	0.01318	0.44658898989899	14	8.78	0.05609	1	14	9.73	0.1075	0.60203768624014	5	4.66	0.50175	1
GO:0051928	positive regulation of calcium ion trans...	15	8.21	0.01318	0.44658898989899	5	3.23	0.22031	1	8	3.5	0.02178	0.319789795918367	2	1.74	0.52522	1
GO:0044093	positive regulation of molecular functio...	165	140.77	0.01328	0.447716180904523	54	52.63	0.44171	1	88	64.08	0.00113	0.0714176470588235	30	30.82	0.59153	1
GO:0006096	glycolysis	14	7.51	0.01374	0.454248390243902	2	2.68	0.75865	1	5	3.43	0.2574	0.847391035548686	8	1.78	0.00034	1
GO:0006979	response to oxidative stress	46	33.38	0.01372	0.454248390243902	17	12.93	0.15021	1	21	14.92	0.07003	0.512589130434783	8	7.43	0.46705	1
GO:0034220	ion transmembrane transport	82	64.96	0.01385	0.454248390243902	27	23.72	0.26814	1	40	28.36	0.01675	0.285170744680851	21	13.69	0.03352	1
GO:0055085	transmembrane transport	131	109.47	0.01388	0.454248390243902	43	39.64	0.30828	1	62	47.62	0.01806	0.297004591836735	32	22.94	0.03406	1
GO:1901701	cellular response to oxygen-containing c...	111	91.11	0.01368	0.454248390243902	34	33.91	0.52035	1	56	41.04	0.0101	0.234529032258065	26	19.98	0.1003	1
GO:2000147	positive regulation of cell motility	45	32.55	0.01385	0.454248390243902	13	12.32	0.46199	1	25	14.5	0.00522	0.164314285714286	9	7.13	0.28408	1
GO:0048513	organ development	352	318.54	0.01401	0.45627713592233	114	118.87	0.71225	1	182	142.66	0.00012	0.0156489795918367	68	68.62	0.55633	1
GO:0001501	skeletal system development	67	51.75	0.01444	0.462282047619048	25	19.15	0.10297	1	35	23.95	0.01487	0.273043965517241	9	11.68	0.83238	1
GO:0002790	peptide secretion	38	26.71	0.01447	0.462282047619048	14	10.31	0.15027	1	16	12.26	0.16506	0.720303481228669	7	6.14	0.41701	1
GO:0051240	positive regulation of multicellular org...	87	69.55	0.01441	0.462282047619048	29	26.23	0.31208	1	42	30.6	0.02195	0.319789795918367	16	14.98	0.42913	1
GO:0051716	cellular response to stimulus	678	637.23	0.0143	0.462282047619048	227	237.49	0.82704	1	322	283.49	0.00142	0.0775538461538462	138	136.06	0.43443	1
GO:0002832	negative regulation of response to bioti...	7	2.78	0.01475	0.462419392523365	3	1.1	0.0931	1	1	1.4	0.76625	1	3	0.72	0.03335	1
GO:0002886	regulation of myeloid leukocyte mediated...	7	2.78	0.01475	0.462419392523365	2	1.1	0.30121	1	6	1.19	0.00073	0.0548788235294118	0	0.61	1	1
GO:0042177	negative regulation of protein catabolic...	11	5.42	0.01469	0.462419392523365	0	2.01	1	1	9	2.59	0.00081	0.056878021978022	2	1.25	0.35761	1
GO:0051180	vitamin transport	7	2.78	0.01475	0.462419392523365	1	1.1	0.67816	1	3	0.98	0.06975	0.511713547646384	3	0.49	0.01164	1
GO:0051270	regulation of cellular component movemen...	85	67.88	0.01507	0.470254093023256	26	25.31	0.47294	1	50	31.09	0.00053	0.0439831168831169	14	14.94	0.63855	1
GO:0009615	response to virus	43	31.02	0.01517	0.471183009259259	22	11.89	0.0038	1	17	13.66	0.20608	0.769188785046729	5	6.48	0.78245	1
GO:0060348	bone development	24	15.3	0.01531	0.473340046082949	5	5.73	0.68675	1	14	7.21	0.01236	0.251529936305733	5	3.64	0.29934	1
GO:0006112	energy reserve metabolic process	31	21	0.01557	0.479170321100917	13	7.75	0.04568	1	14	9.1	0.07055	0.513456150341686	4	4.66	0.69141	1
GO:0002443	leukocyte mediated immunity	37	26.01	0.01573	0.481523227272727	12	9.7	0.26353	1	22	10.57	8e-04	0.056878021978022	7	4.97	0.22882	1
GO:0030030	cell projection organization	149	126.58	0.01579	0.481523227272727	47	46.96	0.52112	1	86	60.09	0.00035	0.034334328358209	20	28.51	0.96894	1
GO:0001775	cell activation	117	97.09	0.0159	0.48268371040724	25	36.41	0.98588	1	62	42.51	0.00153	0.0814725	32	20.74	0.00926	1
GO:0001714	endodermal cell fate specification	4	1.11	0.01638	0.484111982378855	1	0.49	0.39565	1	2	0.42	0.06082	0.484588279301746	1	0.27	0.2371	1
GO:0014848	urinary tract smooth muscle contraction	4	1.11	0.01638	0.484111982378855	0	0.49	1	1	3	0.56	0.01468	0.271113294797688	1	0.3	0.26605	1
GO:0044281	small molecule metabolic process	355	322.3	0.01626	0.484111982378855	139	118.32	0.01775	1	136	141.68	0.72392	1	83	67.82	0.02312	1
GO:0060405	regulation of penile erection	4	1.11	0.01638	0.484111982378855	1	0.37	0.31454	1	3	0.56	0.01468	0.271113294797688	1	0.23	0.20702	1
GO:0061564	axon development	86	68.99	0.01624	0.484111982378855	17	25.74	0.9779	1	60	33.83	8.2e-06	0.00209592	11	16.07	0.93359	1
GO:0071871	response to epinephrine	4	1.11	0.01638	0.484111982378855	1	0.37	0.31454	1	3	0.49	0.00967	0.229707434944238	0	0.3	1	1
GO:0045620	negative regulation of lymphocyte differ...	8	3.48	0.01659	0.486036288209607	2	1.4	0.4136	1	4	1.4	0.04703	0.436804796511628	3	0.68	0.02888	1
GO:0050650	chondroitin sulfate proteoglycan biosynt...	8	3.48	0.01659	0.486036288209607	3	1.22	0.11907	1	3	1.68	0.23435	0.813414720260728	3	0.83	0.04879	1
GO:0000038	very long-chain fatty acid metabolic pro...	7	2.92	0.01953	0.489666946308725	4	1.1	0.02112	1	4	1.26	0.03317	0.389625551470588	0	0.61	1	1
GO:0002062	chondrocyte differentiation	18	10.99	0.02175	0.489666946308725	7	4.15	0.11925	1	9	5.25	0.07758	0.537317342799189	2	2.69	0.75698	1
GO:0003413	chondrocyte differentiation involved in ...	3	0.7	0.02159	0.489666946308725	2	0.3	0.03283	1	1	0.35	0.30449	0.861801018600531	0	0.19	1	1
GO:0006182	cGMP biosynthetic process	7	2.92	0.01953	0.489666946308725	1	0.98	0.63492	1	6	1.19	0.00073	0.0548788235294118	1	0.57	0.44021	1
GO:0006952	defense response	184	159.83	0.01808	0.489666946308725	69	59.04	0.09247	1	84	65.97	0.01117	0.243211224489796	34	31.24	0.32561	1
GO:0006971	hypotonic response	3	0.7	0.02159	0.489666946308725	1	0.3	0.27	1	NA	NA	NA	NA	NA	NA	NA	NA
GO:0006978	DNA damage response, signal transduction...	5	1.67	0.01755	0.489666946308725	2	0.49	0.0814	1	2	0.77	0.1773	0.729988043478261	1	0.3	0.26605	1
GO:0007411	axon guidance	61	47.02	0.01818	0.489666946308725	13	17.5	0.89925	1	42	23.04	1e-04	0.0135957446808511	8	10.96	0.86311	1
GO:0007599	hemostasis	77	61.62	0.0209	0.489666946308725	15	23.05	0.9754	1	41	27.59	0.00673	0.184569527896996	23	13.69	0.01017	1
GO:0009118	regulation of nucleoside metabolic proce...	58	44.37	0.01814	0.489666946308725	20	16.1	0.18544	1	31	20.31	0.01194	0.246118064516129	9	9.78	0.64909	1
GO:0009157	deoxyribonucleoside monophosphate biosyn...	3	0.7	0.02159	0.489666946308725	NA	NA	NA	NA	1	0.35	0.30449	0.861801018600531	NA	NA	NA	NA
GO:0009895	negative regulation of catabolic process	20	12.38	0.0187	0.489666946308725	3	4.7	0.85677	1	14	5.67	0.00136	0.0775538461538462	3	2.81	0.53632	1
GO:0010940	positive regulation of necrotic cell dea...	3	0.7	0.02159	0.489666946308725	2	0.3	0.03283	1	NA	NA	NA	NA	NA	NA	NA	NA
GO:0015851	nucleobase transport	3	0.7	0.02159	0.489666946308725	1	0.3	0.27	1	NA	NA	NA	NA	NA	NA	NA	NA
GO:0016052	carbohydrate catabolic process	26	17.11	0.01776	0.489666946308725	6	6.1	0.57641	1	12	7.42	0.06655	0.510360215053763	9	3.64	0.01039	1
GO:0016925	protein sumoylation	9	4.31	0.02175	0.489666946308725	0	1.65	1	1	6	2.1	0.01612	0.282210410958904	3	0.99	0.07381	1
GO:0019060	intracellular transport of viral protein...	3	0.7	0.02159	0.489666946308725	NA	NA	NA	NA	1	0.35	0.30449	0.861801018600531	NA	NA	NA	NA
GO:0019233	sensory perception of pain	17	10.02	0.0181	0.489666946308725	5	3.66	0.30254	1	5	4.41	0.45418	0.943680638297872	7	2.27	0.00727	1
GO:0019368	fatty acid elongation, unsaturated fatty...	3	0.7	0.02159	0.489666946308725	NA	NA	NA	NA	2	0.35	0.04249	0.423710747663551	NA	NA	NA	NA
GO:0021756	striatum development	5	1.67	0.01755	0.489666946308725	1	0.67	0.49971	1	4	0.84	0.0075	0.201365546218487	0	0.45	1	1
GO:0023019	signal transduction involved in regulati...	7	2.92	0.01953	0.489666946308725	1	1.22	0.71629	1	3	1.47	0.17867	0.729988043478261	3	0.76	0.03817	1
GO:0030091	protein repair	3	0.7	0.02159	0.489666946308725	2	0.3	0.03283	1	0	0.35	1	1	1	0.19	0.17576	1
GO:0030097	hemopoiesis	86	69.41	0.01874	0.489666946308725	22	26.04	0.82546	1	47	30.88	0.00242	0.109672340425532	20	15.13	0.12256	1
GO:0030166	proteoglycan biosynthetic process	12	6.26	0.0174	0.489666946308725	4	2.32	0.1994	1	5	2.87	0.15647	0.698259217877095	4	1.4	0.05016	1
GO:0030204	chondroitin sulfate metabolic process	13	6.96	0.01683	0.489666946308725	6	2.44	0.03282	1	5	3.36	0.24394	0.834909801821103	3	1.55	0.20238	1
GO:0030205	dermatan sulfate metabolic process	5	1.67	0.01755	0.489666946308725	2	0.55	0.10055	1	2	0.84	0.20341	0.761446924428822	2	0.42	0.06287	1
GO:0030278	regulation of ossification	30	20.45	0.01852	0.489666946308725	8	7.75	0.51503	1	15	9.59	0.0559	0.484588279301746	8	4.74	0.10199	1
GO:0030308	negative regulation of cell growth	27	17.94	0.01803	0.489666946308725	5	6.71	0.809	1	16	8.47	0.01011	0.234529032258065	6	4.13	0.23223	1
GO:0030431	sleep	8	3.62	0.02112	0.489666946308725	1	1.34	0.74991	1	5	1.54	0.0161	0.282210410958904	2	0.72	0.16081	1
GO:0030500	regulation of bone mineralization	14	7.79	0.01884	0.489666946308725	3	3.11	0.60924	1	7	3.64	0.06899	0.511713547646384	5	1.9	0.03999	1
GO:0030581	symbiont intracellular protein transport...	3	0.7	0.02159	0.489666946308725	NA	NA	NA	NA	1	0.35	0.30449	0.861801018600531	NA	NA	NA	NA
GO:0030823	regulation of cGMP metabolic process	7	2.92	0.01953	0.489666946308725	1	0.98	0.63492	1	6	1.33	0.00142	0.0775538461538462	1	0.64	0.48192	1
GO:0032970	regulation of actin filament-based proce...	43	31.44	0.01885	0.489666946308725	10	11.83	0.75325	1	29	15.2	0.00056	0.0452962025316456	8	7.43	0.46705	1
GO:0032989	cellular component morphogenesis	156	133.96	0.01959	0.489666946308725	40	50.01	0.94889	1	93	63.17	7.1e-05	0.0110656097560976	29	30.37	0.63314	1
GO:0033124	regulation of GTP catabolic process	53	40.2	0.01983	0.489666946308725	17	14.58	0.28988	1	29	18.63	0.01143	0.244633663366337	9	8.99	0.54659	1
GO:0034405	response to fluid shear stress	7	2.92	0.01953	0.489666946308725	1	1.22	0.71629	1	6	1.33	0.00142	0.0775538461538462	0	0.72	1	1
GO:0034755	iron ion transmembrane transport	3	0.7	0.02159	0.489666946308725	1	0.3	0.27	1	1	0.35	0.30449	0.861801018600531	1	0.19	0.17576	1
GO:0035412	regulation of catenin import into nucleu...	7	2.92	0.01953	0.489666946308725	0	1.1	1	1	6	1.33	0.00142	0.0775538461538462	1	0.68	0.5016	1
GO:0042311	vasodilation	14	7.79	0.01884	0.489666946308725	6	2.81	0.05911	1	7	3.5	0.05798	0.484588279301746	1	1.71	0.8251	1
GO:0043087	regulation of GTPase activity	53	40.06	0.01864	0.489666946308725	17	14.52	0.28404	1	29	18.56	0.01088	0.239187328767123	9	8.95	0.54142	1
GO:0043270	positive regulation of ion transport	26	17.11	0.01776	0.489666946308725	9	6.77	0.23552	1	14	7.56	0.01822	0.297004591836735	4	3.83	0.53663	1
GO:0043900	regulation of multi-organism process	42	30.74	0.02047	0.489666946308725	17	11.47	0.06667	1	18	13.59	0.13444	0.656782568807339	8	6.14	0.2722	1
GO:0045981	positive regulation of nucleotide metabo...	17	10.15	0.02063	0.489666946308725	7	3.72	0.07657	1	6	4.55	0.30278	0.861801018600531	3	2.27	0.39885	1
GO:0046719	regulation by virus of viral protein lev...	3	0.7	0.02159	0.489666946308725	NA	NA	NA	NA	1	0.35	0.30449	0.861801018600531	NA	NA	NA	NA
GO:0050803	regulation of synapse structure and acti...	14	7.79	0.01884	0.489666946308725	2	2.74	0.7696	1	9	3.78	0.01191	0.246118064516129	2	1.71	0.51338	1
GO:0050808	synapse organization	28	18.78	0.01824	0.489666946308725	6	6.59	0.6518	1	18	8.96	0.00344	0.128908092485549	3	3.98	0.7664	1
GO:0050866	negative regulation of cell activation	22	14.05	0.02002	0.489666946308725	5	5.43	0.63932	1	12	5.88	0.01363	0.263298795180723	6	2.88	0.06779	1
GO:0050878	regulation of body fluid levels	92	74.98	0.0196	0.489666946308725	21	28.05	0.93909	1	46	33.34	0.01557	0.281051694915254	27	16.57	0.0083	1
GO:0051056	regulation of small GTPase mediated sign...	61	47.29	0.02038	0.489666946308725	14	16.95	0.8081	1	36	22.27	0.00281	0.118913245033113	14	10.46	0.16421	1
GO:0051146	striated muscle cell differentiation	36	25.73	0.02166	0.489666946308725	10	9.76	0.51528	1	21	11.91	0.00775	0.20687625	6	5.88	0.53824	1
GO:0051708	intracellular protein transport in other...	3	0.7	0.02159	0.489666946308725	NA	NA	NA	NA	1	0.35	0.30449	0.861801018600531	NA	NA	NA	NA
GO:0055114	oxidation-reduction process	78	62.04	0.0176	0.489666946308725	29	22.81	0.10761	1	34	26.89	0.09211	0.57478798828125	16	13.12	0.2401	1
GO:0060078	regulation of postsynaptic membrane pote...	11	5.56	0.01778	0.489666946308725	2	1.83	0.55395	1	9	2.73	0.00121	0.0743451923076923	1	1.25	0.72133	1
GO:0060912	cardiac cell fate specification	3	0.7	0.02159	0.489666946308725	0	0.3	1	1	2	0.35	0.04249	0.423710747663551	1	0.19	0.17576	1
GO:0070977	bone maturation	5	1.67	0.01755	0.489666946308725	1	0.55	0.43254	1	2	0.77	0.1773	0.729988043478261	2	0.34	0.04325	1
GO:0071222	cellular response to lipopolysaccharide	21	13.35	0.02169	0.489666946308725	7	4.94	0.2235	1	9	5.53	0.09984	0.586780035492458	5	2.62	0.1202	1
GO:0071345	cellular response to cytokine stimulus	70	55.08	0.01888	0.489666946308725	30	21.04	0.03106	1	23	23.81	0.60113	1	17	11.98	0.09218	1
GO:0072103	glomerulus vasculature morphogenesis	3	0.7	0.02159	0.489666946308725	0	0.3	1	1	3	0.35	0.00307	0.121846583850932	0	0.19	1	1
GO:0072104	glomerular capillary formation	3	0.7	0.02159	0.489666946308725	0	0.3	1	1	3	0.35	0.00307	0.121846583850932	0	0.19	1	1
GO:0090245	axis elongation involved in somitogenesi...	3	0.7	0.02159	0.489666946308725	1	0.3	0.27	1	2	0.35	0.04249	0.423710747663551	0	0.19	1	1
GO:0097485	neuron projection guidance	61	47.02	0.01818	0.489666946308725	13	17.5	0.89925	1	42	23.04	1e-04	0.0135957446808511	8	10.96	0.86311	1
GO:1900119	positive regulation of execution phase o...	3	0.7	0.02159	0.489666946308725	2	0.3	0.03283	1	0	0.35	1	1	1	0.19	0.17576	1
GO:1900544	positive regulation of purine nucleotide...	17	10.15	0.02063	0.489666946308725	7	3.72	0.07657	1	6	4.55	0.30278	0.861801018600531	3	2.27	0.39885	1
GO:1901386	negative regulation of voltage-gated cal...	3	0.7	0.02159	0.489666946308725	NA	NA	NA	NA	1	0.35	0.30449	0.861801018600531	1	0.19	0.17576	1
GO:1902231	positive regulation of intrinsic apoptot...	3	0.7	0.02159	0.489666946308725	1	0.3	0.27	1	2	0.35	0.04249	0.423710747663551	0	0.19	1	1
GO:1902253	regulation of intrinsic apoptotic signal...	5	1.67	0.01755	0.489666946308725	1	0.61	0.46718	1	1	0.77	0.55025	0.987402461538462	3	0.38	0.00531	1
GO:2000026	regulation of multicellular organismal d...	176	152.59	0.01926	0.489666946308725	49	57.76	0.90914	1	100	69.47	9e-05	0.0130704545454545	29	33.63	0.82835	1
GO:2001198	regulation of dendritic cell differentia...	3	0.7	0.02159	0.489666946308725	NA	NA	NA	NA	NA	NA	NA	NA	NA	NA	NA	NA
GO:2001267	regulation of cysteine-type endopeptidas...	3	0.7	0.02159	0.489666946308725	NA	NA	NA	NA	1	0.35	0.30449	0.861801018600531	NA	NA	NA	NA
GO:0036293	response to decreased oxygen levels	41	30.05	0.02223	0.498799565217391	17	11.34	0.06157	1	19	14.29	0.12353	0.637799060297572	9	7.01	0.26874	1
GO:0033688	regulation of osteoblast proliferation	6	2.36	0.0226	0.503732225913621	3	0.91	0.05933	1	1	1.19	0.70925	1	2	0.57	0.10879	1
GO:0042554	superoxide anion generation	6	2.36	0.0226	0.503732225913621	1	0.85	0.58588	1	3	1.05	0.08281	0.537317342799189	2	0.53	0.09662	1
GO:0051704	multi-organism process	245	218.67	0.02268	0.503841456953642	97	80.93	0.02966	1	103	94.19	0.17035	0.728118060200669	46	44.85	0.45042	1
GO:0030072	peptide hormone secretion	36	25.87	0.02338	0.51767795379538	13	10	0.20095	1	16	11.91	0.13897	0.675299087452471	6	5.95	0.55091	1
GO:0010976	positive regulation of neuron projection...	15	8.76	0.02367	0.522375098684211	3	3.29	0.64814	1	11	3.92	0.0015	0.080546218487395	2	1.93	0.58146	1
GO:0000902	cell morphogenesis	146	125.75	0.02572	0.527562314540059	38	46.84	0.93205	1	89	59.74	6.7e-05	0.01070325	25	28.66	0.79391	1
GO:0002092	positive regulation of receptor internal...	5	1.81	0.02531	0.527562314540059	0	0.67	1	1	5	0.84	0.00087	0.0597774193548387	0	0.42	1	1
GO:0002480	antigen processing and presentation of e...	4	1.25	0.02628	0.527562314540059	1	0.43	0.35637	1	4	0.63	0.00226	0.106656617647059	0	0.27	1	1
GO:0002761	regulation of myeloid leukocyte differen...	18	11.13	0.02453	0.527562314540059	6	4.27	0.25384	1	9	4.62	0.03955	0.423444	3	2.24	0.38851	1
GO:0007165	signal transduction	566	530.95	0.02528	0.527562314540059	186	198.82	0.88311	1	281	237.2	0.00022	0.02556	110	114.3	0.71129	1
GO:0010454	negative regulation of cell fate commitm...	5	1.81	0.02531	0.527562314540059	2	0.79	0.18605	1	2	0.84	0.20341	0.761446924428822	1	0.45	0.37128	1
GO:0015980	energy derivation by oxidation of organi...	48	36.31	0.02448	0.527562314540059	19	13.54	0.0844	1	21	16.04	0.12325	0.637799060297572	8	8	0.55127	1
GO:0017158	regulation of calcium ion-dependent exoc...	8	3.76	0.02645	0.527562314540059	1	1.34	0.74991	1	7	1.61	0.00073	0.0548788235294118	0	0.76	1	1
GO:0019048	modulation by virus of host morphology o...	7	3.06	0.0253	0.527562314540059	4	1.1	0.02112	1	3	1.54	0.19684	0.761446924428822	1	0.68	0.5016	1
GO:0030206	chondroitin sulfate biosynthetic process	7	3.06	0.0253	0.527562314540059	3	1.04	0.0811	1	3	1.54	0.19684	0.761446924428822	2	0.72	0.16081	1
GO:0030828	positive regulation of cGMP biosynthetic...	4	1.25	0.02628	0.527562314540059	1	0.43	0.35637	1	3	0.63	0.02088	0.31100979020979	0	0.3	1	1
GO:0031115	negative regulation of microtubule polym...	4	1.25	0.02628	0.527562314540059	1	0.43	0.35637	1	3	0.56	0.01468	0.271113294797688	0	0.27	1	1
GO:0032232	negative regulation of actin filament bu...	4	1.25	0.02628	0.527562314540059	0	0.37	1	1	4	0.63	0.00226	0.106656617647059	0	0.23	1	1
GO:0032459	regulation of protein oligomerization	7	3.06	0.0253	0.527562314540059	2	1.22	0.347	1	3	1.54	0.19684	0.761446924428822	2	0.8	0.18823	1
GO:0033003	regulation of mast cell activation	7	3.06	0.0253	0.527562314540059	2	1.16	0.32421	1	6	1.33	0.00142	0.0775538461538462	0	0.64	1	1
GO:0038084	vascular endothelial growth factor signa...	5	1.81	0.02531	0.527562314540059	0	0.67	1	1	4	0.77	0.00529	0.164893170731707	1	0.38	0.3207	1
GO:0039528	cytoplasmic pattern recognition receptor...	5	1.81	0.02531	0.527562314540059	1	0.79	0.55894	1	3	0.84	0.04675	0.436804796511628	1	0.45	0.37128	1
GO:0043312	neutrophil degranulation	4	1.25	0.02628	0.527562314540059	2	0.55	0.10055	1	2	0.56	0.10349	0.586780035492458	0	0.3	1	1
GO:0044058	regulation of digestive system process	8	3.76	0.02645	0.527562314540059	1	1.4	0.76519	1	5	1.75	0.02733	0.358179754601227	2	0.83	0.20218	1
GO:0048863	stem cell differentiation	49	37.28	0.0256	0.527562314540059	19	13.97	0.10596	1	22	17.79	0.17615	0.729988043478261	8	8.57	0.62957	1
GO:0051250	negative regulation of lymphocyte activa...	17	10.43	0.0265	0.527562314540059	5	4.09	0.3885	1	7	4.27	0.13275	0.652517307692308	6	2.12	0.01872	1
GO:0051321	meiotic cell cycle	29	20.17	0.02618	0.527562314540059	11	7.44	0.12454	1	8	8.89	0.67323	1	10	4.44	0.01321	1
GO:0052173	response to defenses of other organism i...	4	1.25	0.02628	0.527562314540059	1	0.49	0.39565	1	1	0.63	0.47989	0.943680638297872	2	0.34	0.04325	1
GO:0052200	response to host defenses	4	1.25	0.02628	0.527562314540059	1	0.49	0.39565	1	1	0.63	0.47989	0.943680638297872	2	0.34	0.04325	1
GO:0055007	cardiac muscle cell differentiation	17	10.43	0.0265	0.527562314540059	5	3.9	0.35151	1	11	4.97	0.00994	0.234529032258065	1	2.31	0.90611	1
GO:0060307	regulation of ventricular cardiac muscle...	5	1.81	0.02531	0.527562314540059	1	0.67	0.49971	1	4	0.91	0.01024	0.234529032258065	1	0.42	0.34648	1
GO:0070167	regulation of biomineral tissue developm...	14	8.07	0.02526	0.527562314540059	3	3.23	0.63549	1	7	3.71	0.07493	0.534975083798883	5	1.93	0.04302	1
GO:0070372	regulation of ERK1 and ERK2 cascade	25	16.83	0.02579	0.527562314540059	4	6.22	0.87669	1	14	7.42	0.01567	0.281267696629213	7	3.68	0.07484	1
GO:0070527	platelet aggregation	8	3.76	0.02645	0.527562314540059	1	1.52	0.79303	1	7	1.75	0.00126	0.0752467289719626	1	0.91	0.60496	1
GO:0072310	glomerular epithelial cell development	4	1.25	0.02628	0.527562314540059	3	0.49	0.01003	1	2	0.56	0.10349	0.586780035492458	0	0.27	1	1
GO:0075136	response to host	4	1.25	0.02628	0.527562314540059	1	0.49	0.39565	1	1	0.63	0.47989	0.943680638297872	2	0.34	0.04325	1
GO:1901385	regulation of voltage-gated calcium chan...	5	1.81	0.02531	0.527562314540059	3	0.67	0.02577	1	2	0.84	0.20341	0.761446924428822	1	0.49	0.39515	1
GO:2000047	regulation of cell-cell adhesion mediate...	4	1.25	0.02628	0.527562314540059	2	0.37	0.04727	1	2	0.63	0.12709	0.637799060297572	0	0.27	1	1
GO:0045071	negative regulation of viral genome repl...	9	4.45	0.02664	0.528780355029586	5	1.83	0.03329	1	2	1.82	0.55242	0.987402461538462	1	0.91	0.60496	1
GO:0033135	regulation of peptidyl-serine phosphoryl...	15	8.9	0.02707	0.534154794117647	5	3.54	0.27845	1	9	3.99	0.01673	0.285170744680851	2	2.09	0.62283	1
GO:0055117	regulation of cardiac muscle contraction	15	8.9	0.02707	0.534154794117647	6	3.54	0.14048	1	9	4.27	0.0252	0.341702542372881	1	2.27	0.90238	1
GO:0030802	regulation of cyclic nucleotide biosynth...	22	14.47	0.02738	0.537112339181287	11	5.37	0.01763	1	10	6.44	0.10896	0.606021148825065	3	3.26	0.63874	1
GO:0042770	signal transduction in response to DNA d...	22	14.47	0.02738	0.537112339181287	9	5.25	0.07789	1	8	6.86	0.37994	0.896399366420275	6	3.3	0.11193	1
GO:0035282	segmentation	18	11.27	0.02758	0.538865319767442	4	3.9	0.55367	1	12	5.32	0.00623	0.177562831858407	2	2.31	0.67885	1
GO:0065008	regulation of biological quality	367	337.18	0.02763	0.538865319767442	119	125.27	0.75682	1	174	150.15	0.01424	0.271113294797688	79	72.52	0.20895	1
GO:0019221	cytokine-mediated signaling pathway	54	41.87	0.0278	0.540609275362319	23	15.98	0.04953	1	16	18.56	0.76765	1	16	9.33	0.02478	1
GO:0007420	brain development	88	72.47	0.02807	0.544282167630058	28	27.57	0.49465	1	51	34.39	0.00277	0.118002	12	16.68	0.9131	1
GO:0051241	negative regulation of multicellular org...	56	43.68	0.02824	0.545178338108882	19	16.71	0.31357	1	26	19.19	0.06954	0.511713547646384	11	9.59	0.36419	1
GO:0071229	cellular response to acid	25	16.97	0.0283	0.545178338108882	7	6.46	0.47058	1	14	7.77	0.02264	0.325832432432432	6	3.87	0.19008	1
GO:0098542	defense response to other organism	50	38.39	0.02836	0.545178338108882	19	14.7	0.15021	1	23	14.85	0.02377	0.333824835164835	8	6.98	0.39748	1
GO:0045595	regulation of cell differentiation	166	144.94	0.02851	0.54646811965812	46	55.07	0.92141	1	89	66.11	0.00194	0.096593023255814	32	32.26	0.54798	1
GO:0051494	negative regulation of cytoskeleton orga...	16	9.74	0.02859	0.54646811965812	4	3.78	0.52822	1	11	4.55	0.00508	0.161015346534653	2	2.27	0.67	1
GO:0046578	regulation of Ras protein signal transdu...	46	34.91	0.02872	0.547393409090909	11	12.62	0.72499	1	26	16.25	0.01154	0.244633663366337	12	7.85	0.09461	1
GO:0022610	biological adhesion	137	117.82	0.02883	0.547933342776204	36	43.3	0.90043	1	76	51.68	0.00036	0.034334328358209	29	24.53	0.19575	1
GO:0001756	somitogenesis	14	8.21	0.02902	0.548437126760563	3	2.93	0.56757	1	10	3.78	0.00382	0.13411978021978	1	1.71	0.8251	1
GO:0032481	positive regulation of type I interferon...	14	8.21	0.02902	0.548437126760563	7	2.93	0.02525	1	3	3.64	0.71561	1	3	1.63	0.2223	1
GO:0006298	mismatch repair	6	2.5	0.03001	0.559269694444445	1	0.79	0.55894	1	3	1.26	0.12746	0.637799060297572	1	0.53	0.41811	1
GO:0006760	folic acid-containing compound metabolic...	6	2.5	0.03001	0.559269694444445	3	0.91	0.05933	1	2	0.98	0.2566	0.846065015479876	2	0.45	0.07361	1
GO:0021543	pallium development	21	13.77	0.02979	0.559269694444445	5	5.31	0.61915	1	16	6.58	0.00075	0.0550862068965517	1	3.22	0.96315	1
GO:0031648	protein destabilization	6	2.5	0.03001	0.559269694444445	3	0.85	0.04965	1	2	1.12	0.30998	0.863834365460096	1	0.57	0.44021	1
GO:0045581	negative regulation of T cell differenti...	6	2.5	0.03001	0.559269694444445	1	1.04	0.65722	1	3	1.05	0.08281	0.537317342799189	3	0.53	0.0144	1
GO:0016051	carbohydrate biosynthetic process	32	22.95	0.03036	0.564225041551247	9	8.84	0.5279	1	13	10.08	0.20834	0.775359697146185	11	5.19	0.01486	1
GO:0006820	anion transport	60	47.43	0.0305	0.565261049723757	21	17.81	0.24603	1	28	20.87	0.06779	0.511713547646384	16	10.12	0.04708	1
GO:0009187	cyclic nucleotide metabolic process	28	19.61	0.03103	0.570265	12	7.32	0.06176	1	10	8.75	0.37871	0.896399366420275	8	4.44	0.07612	1
GO:0019216	regulation of lipid metabolic process	37	27.26	0.03096	0.570265	11	10.06	0.42508	1	23	12.33	0.00271	0.117802040816327	5	6.07	0.73129	1
GO:0040017	positive regulation of locomotion	45	34.22	0.03111	0.570265	13	12.99	0.54046	1	25	15.34	0.01051	0.236475	9	7.54	0.34211	1
GO:0048562	embryonic organ morphogenesis	45	34.22	0.03111	0.570265	15	12.87	0.30652	1	25	16.74	0.02831	0.3618018	8	8.15	0.57283	1
GO:0000904	cell morphogenesis involved in different...	110	93.06	0.0313	0.57218446866485	22	34.28	0.99275	1	73	45.1	2.2e-05	0.00453483870967742	19	21.23	0.72729	1
GO:0007155	cell adhesion	136	117.4	0.03264	0.575107454068241	36	43.12	0.89529	1	76	51.54	0.00033	0.0334714285714286	28	24.45	0.252	1
GO:0007596	blood coagulation	75	61.07	0.03201	0.575107454068241	15	22.87	0.97317	1	41	27.31	0.00566	0.170881900452489	21	13.53	0.03021	1
GO:0007620	copulation	7	3.2	0.03212	0.575107454068241	1	1.16	0.69783	1	4	1.19	0.02727	0.358179754601227	3	0.49	0.01164	1
GO:0009894	regulation of catabolic process	98	82.07	0.03198	0.575107454068241	30	30.62	0.57509	1	54	38.03	0.00526	0.164761764705882	20	18.5	0.3917	1
GO:0032879	regulation of localization	216	192.93	0.03248	0.575107454068241	76	73.49	0.39317	1	110	86.63	0.00412	0.141395744680851	37	42.5	0.84211	1
GO:0035411	catenin import into nucleus	7	3.2	0.03212	0.575107454068241	0	1.1	1	1	6	1.47	0.00252	0.112606993006993	1	0.68	0.5016	1
GO:0040012	regulation of locomotion	80	65.66	0.03253	0.575107454068241	25	24.7	0.50553	1	47	29.69	0.00108	0.069012	12	14.37	0.78046	1
GO:0045912	negative regulation of carbohydrate meta...	8	3.89	0.03266	0.575107454068241	2	1.46	0.43506	1	5	1.89	0.03703	0.405426962457338	1	0.91	0.60496	1
GO:0046364	monosaccharide biosynthetic process	16	9.88	0.03231	0.575107454068241	3	3.78	0.73807	1	6	4.34	0.26582	0.861801018600531	7	2.27	0.00727	1
GO:0050688	regulation of defense response to virus	16	9.88	0.03231	0.575107454068241	5	3.78	0.32693	1	7	4.41	0.14991	0.692272805139186	4	2.09	0.15463	1
GO:0050690	regulation of defense response to virus ...	8	3.89	0.03266	0.575107454068241	1	1.4	0.76519	1	5	1.89	0.03703	0.405426962457338	2	0.83	0.20218	1
GO:0050865	regulation of cell activation	58	45.76	0.03186	0.575107454068241	14	16.77	0.79558	1	33	19.68	0.00231	0.107743795620438	13	9.44	0.15137	1
GO:0060401	cytosolic calcium ion transport	19	12.24	0.03174	0.575107454068241	4	4.7	0.69915	1	13	5.32	0.00219	0.106015909090909	3	2.77	0.52707	1
GO:0070373	negative regulation of ERK1 and ERK2 cas...	7	3.2	0.03212	0.575107454068241	2	1.28	0.36953	1	4	1.54	0.06364	0.492865496368039	1	0.8	0.55627	1
GO:0007409	axonogenesis	81	66.63	0.03318	0.582734607329843	16	24.76	0.98037	1	56	32.78	4.8e-05	0.00846243243243243	11	15.54	0.91495	1
GO:0033121	regulation of purine nucleotide cataboli...	56	44.1	0.03327	0.582789634464752	19	15.98	0.24821	1	30	20.17	0.01844	0.299064974619289	9	9.71	0.63989	1
GO:0080134	regulation of response to stress	122	104.47	0.03361	0.587212213541667	48	39.09	0.07866	1	54	45.45	0.10245	0.586780035492458	25	22.1	0.28813	1
GO:0048534	hematopoietic or lymphoid organ developm...	89	74	0.03383	0.589520701298701	22	27.87	0.90235	1	50	33.13	0.00212	0.103410687022901	20	16.23	0.1949	1
GO:0002507	tolerance induction	5	1.95	0.03496	0.59019022556391	1	0.85	0.58588	1	4	0.98	0.01355	0.263298795180723	0	0.53	1	1
GO:0010717	regulation of epithelial to mesenchymal ...	11	6.12	0.03509	0.59019022556391	4	2.2	0.17435	1	6	2.87	0.06399	0.493240168878167	1	1.33	0.74213	1
GO:0010719	negative regulation of epithelial to mes...	5	1.95	0.03496	0.59019022556391	2	0.67	0.14189	1	3	0.91	0.05771	0.484588279301746	0	0.42	1	1
GO:0015672	monovalent inorganic cation transport	54	42.43	0.03474	0.59019022556391	15	16.41	0.67885	1	25	18.56	0.07799	0.537317342799189	19	9.33	0.00253	1
GO:0030036	actin cytoskeleton organization	70	56.75	0.03437	0.59019022556391	16	21.16	0.90638	1	43	26.4	0.00099	0.0658762886597938	16	12.74	0.20622	1
GO:0030811	regulation of nucleotide catabolic proce...	56	44.23	0.0351	0.59019022556391	19	16.04	0.25343	1	30	20.24	0.01926	0.305212776412776	9	9.74	0.64451	1
GO:0032098	regulation of appetite	5	1.95	0.03496	0.59019022556391	2	0.79	0.18605	1	1	0.91	0.61111	1	2	0.49	0.08488	1
GO:0032456	endocytic recycling	5	1.95	0.03496	0.59019022556391	1	0.85	0.58588	1	2	0.7	0.15178	0.692272805139186	1	0.42	0.34648	1
GO:0035456	response to interferon-beta	5	1.95	0.03496	0.59019022556391	1	0.79	0.55894	1	2	0.91	0.22991	0.807253669222344	0	0.45	1	1
GO:0043267	negative regulation of potassium ion tra...	5	1.95	0.03496	0.59019022556391	0	0.67	1	1	3	0.98	0.06975	0.511713547646384	3	0.49	0.01164	1
GO:0043304	regulation of mast cell degranulation	5	1.95	0.03496	0.59019022556391	2	0.73	0.16371	1	4	0.84	0.0075	0.201365546218487	0	0.42	1	1
GO:0045109	intermediate filament organization	5	1.95	0.03496	0.59019022556391	4	0.73	0.00457	1	0	0.84	1	1	1	0.38	0.3207	1
GO:0050651	dermatan sulfate proteoglycan biosynthet...	5	1.95	0.03496	0.59019022556391	2	0.73	0.16371	1	2	0.98	0.2566	0.846065015479876	2	0.53	0.09662	1
GO:0050817	coagulation	75	61.34	0.03505	0.59019022556391	15	22.99	0.97468	1	41	27.38	0.00591	0.170881900452489	21	13.57	0.03101	1
GO:0003308	negative regulation of Wnt signaling pat...	3	0.83	0.03874	0.591542979683973	1	0.37	0.31454	1	1	0.42	0.35322	0.874768965517241	1	0.23	0.20702	1
GO:0006858	extracellular transport	3	0.83	0.03874	0.591542979683973	3	0.3	0.00206	1	1	0.42	0.35322	0.874768965517241	0	0.19	1	1
GO:0007126	meiotic nuclear division	27	19.06	0.03673	0.591542979683973	10	7.01	0.16323	1	7	8.33	0.73666	1	10	4.17	0.00875	1
GO:0007618	mating	10	5.42	0.03698	0.591542979683973	1	1.89	0.85827	1	6	2.1	0.01612	0.282210410958904	3	0.87	0.05458	1
GO:0009190	cyclic nucleotide biosynthetic process	23	15.72	0.03684	0.591542979683973	11	5.85	0.03146	1	10	6.93	0.15419	0.696069620253165	4	3.49	0.46329	1
GO:0010310	regulation of hydrogen peroxide metaboli...	3	0.83	0.03874	0.591542979683973	NA	NA	NA	NA	2	0.35	0.04249	0.423710747663551	NA	NA	NA	NA
GO:0010763	positive regulation of fibroblast migrat...	3	0.83	0.03874	0.591542979683973	0	0.37	1	1	3	0.42	0.00583	0.170881900452489	1	0.23	0.20702	1
GO:0010922	positive regulation of phosphatase activ...	6	2.64	0.03885	0.591542979683973	1	0.91	0.61117	1	3	1.12	0.09684	0.579950890346767	2	0.53	0.09662	1
GO:0021604	cranial nerve structural organization	3	0.83	0.03874	0.591542979683973	1	0.37	0.31454	1	1	0.35	0.30449	0.861801018600531	1	0.19	0.17576	1
GO:0030517	negative regulation of axon extension	6	2.64	0.03885	0.591542979683973	1	0.98	0.63492	1	5	1.26	0.00661	0.182848051948052	0	0.57	1	1
GO:0031346	positive regulation of cell projection o...	31	22.53	0.03846	0.591542979683973	5	7.87	0.90132	1	23	10.64	0.00036	0.034334328358209	3	4.78	0.86221	1
GO:0032878	regulation of establishment or maintenan...	4	1.39	0.03906	0.591542979683973	0	0.43	1	1	3	0.56	0.01468	0.271113294797688	2	0.27	0.02652	1
GO:0032928	regulation of superoxide anion generatio...	4	1.39	0.03906	0.591542979683973	1	0.55	0.43254	1	2	0.56	0.10349	0.586780035492458	1	0.3	0.26605	1
GO:0042053	regulation of dopamine metabolic process	4	1.39	0.03906	0.591542979683973	1	0.49	0.39565	1	2	0.7	0.15178	0.692272805139186	2	0.38	0.05273	1
GO:0042713	sperm ejaculation	3	0.83	0.03874	0.591542979683973	NA	NA	NA	NA	2	0.35	0.04249	0.423710747663551	NA	NA	NA	NA
GO:0043085	positive regulation of catalytic activit...	134	115.87	0.03538	0.591542979683973	44	43.06	0.46316	1	74	52.73	0.0016	0.0844958677685951	22	25.29	0.78463	1
GO:0043300	regulation of leukocyte degranulation	6	2.64	0.03885	0.591542979683973	2	1.04	0.27809	1	5	1.12	0.00379	0.13411978021978	0	0.57	1	1
GO:0044275	cellular carbohydrate catabolic process	12	6.96	0.0382	0.591542979683973	3	2.62	0.49241	1	6	2.87	0.06399	0.493240168878167	4	1.55	0.06849	1
GO:0044331	cell-cell adhesion mediated by cadherin	4	1.39	0.03906	0.591542979683973	2	0.43	0.06356	1	2	0.7	0.15178	0.692272805139186	0	0.3	1	1
GO:0044332	Wnt signaling pathway involved in dorsal...	3	0.83	0.03874	0.591542979683973	1	0.3	0.27	1	1	0.35	0.30449	0.861801018600531	0	0.19	1	1
GO:0045059	positive thymic T cell selection	4	1.39	0.03906	0.591542979683973	0	0.55	1	1	2	0.7	0.15178	0.692272805139186	2	0.34	0.04325	1
GO:0045061	thymic T cell selection	6	2.64	0.03885	0.591542979683973	0	0.91	1	1	3	1.33	0.14391	0.687151680358477	2	0.57	0.10879	1
GO:0045161	neuronal ion channel clustering	4	1.39	0.03906	0.591542979683973	0	0.49	1	1	4	0.63	0.00226	0.106656617647059	0	0.3	1	1
GO:0045655	regulation of monocyte differentiation	4	1.39	0.03906	0.591542979683973	0	0.43	1	1	4	0.7	0.00356	0.129615340909091	0	0.3	1	1
GO:0046655	folic acid metabolic process	3	0.83	0.03874	0.591542979683973	1	0.3	0.27	1	1	0.35	0.30449	0.861801018600531	NA	NA	NA	NA
GO:0048147	negative regulation of fibroblast prolif...	6	2.64	0.03885	0.591542979683973	5	1.1	0.00366	1	1	1.26	0.72965	1	0	0.64	1	1
GO:0048667	cell morphogenesis involved in neuron di...	88	73.45	0.03761	0.591542979683973	17	26.96	0.98762	1	61	36	2.8e-05	0.00559125	13	16.91	0.8715	1
GO:0048812	neuron projection morphogenesis	90	75.25	0.0373	0.591542979683973	18	27.51	0.98282	1	63	36.91	1.7e-05	0.00374586206896552	11	17.17	0.96134	1
GO:0051279	regulation of release of sequestered cal...	10	5.42	0.03698	0.591542979683973	2	2.07	0.62282	1	8	2.24	0.00129	0.076325	2	1.25	0.35761	1
GO:0051901	positive regulation of mitochondrial dep...	3	0.83	0.03874	0.591542979683973	0	0.3	1	1	1	0.35	0.30449	0.861801018600531	NA	NA	NA	NA
GO:0060536	cartilage morphogenesis	4	1.39	0.03906	0.591542979683973	2	0.43	0.06356	1	1	0.7	0.51635	0.963069614711033	1	0.3	0.26605	1
GO:0061438	renal system vasculature morphogenesis	3	0.83	0.03874	0.591542979683973	0	0.37	1	1	3	0.35	0.00307	0.121846583850932	0	0.19	1	1
GO:0061439	kidney vasculature morphogenesis	3	0.83	0.03874	0.591542979683973	0	0.37	1	1	3	0.35	0.00307	0.121846583850932	0	0.19	1	1
GO:0070542	response to fatty acid	10	5.42	0.03698	0.591542979683973	3	1.95	0.30968	1	5	2.38	0.0858	0.547167664670659	1	1.18	0.69885	1
GO:0071219	cellular response to molecule of bacteri...	21	14.05	0.03633	0.591542979683973	7	5.25	0.27017	1	9	5.81	0.1254	0.637799060297572	5	2.77	0.1428	1
GO:0071243	cellular response to arsenic-containing ...	3	0.83	0.03874	0.591542979683973	1	0.37	0.31454	1	2	0.35	0.04249	0.423710747663551	0	0.19	1	1
GO:0071731	response to nitric oxide	3	0.83	0.03874	0.591542979683973	1	0.3	0.27	1	1	0.35	0.30449	0.861801018600531	NA	NA	NA	NA
GO:0071872	cellular response to epinephrine stimulu...	3	0.83	0.03874	0.591542979683973	NA	NA	NA	NA	2	0.35	0.04249	0.423710747663551	0	0.23	1	1
GO:0090066	regulation of anatomical structure size	52	40.9	0.0383	0.591542979683973	19	15.43	0.20328	1	26	18.98	0.06265	0.492865496368039	10	9.33	0.45684	1
GO:0090280	positive regulation of calcium ion impor...	4	1.39	0.03906	0.591542979683973	2	0.49	0.0814	1	2	0.56	0.10349	0.586780035492458	0	0.27	1	1
GO:2000049	positive regulation of cell-cell adhesio...	3	0.83	0.03874	0.591542979683973	2	0.3	0.03283	1	1	0.42	0.35322	0.874768965517241	0	0.19	1	1
GO:2000109	regulation of macrophage apoptotic proce...	3	0.83	0.03874	0.591542979683973	1	0.3	0.27	1	2	0.42	0.06082	0.484588279301746	0	0.23	1	1
GO:2000252	negative regulation of feeding behavior	3	0.83	0.03874	0.591542979683973	2	0.3	0.03283	1	0	0.35	1	1	NA	NA	NA	NA
GO:2000378	negative regulation of reactive oxygen s...	4	1.39	0.03906	0.591542979683973	1	0.55	0.43254	1	1	0.56	0.44069	0.922374418604651	1	0.34	0.2939	1
GO:0006790	sulfur compound metabolic process	38	28.65	0.03993	0.592135748898678	16	10.06	0.04411	1	14	12.96	0.42178	0.922374418604651	7	6.1	0.41076	1
GO:0008016	regulation of heart contraction	26	18.36	0.04006	0.592135748898678	12	7.07	0.05002	1	14	8.61	0.04845	0.446106465517241	1	4.44	0.98945	1
GO:0010646	regulation of cell communication	313	287.25	0.03955	0.592135748898678	96	106.43	0.88656	1	161	131.03	0.00195	0.096593023255814	66	62.44	0.32714	1
GO:0010942	positive regulation of cell death	60	48.13	0.0394	0.592135748898678	19	18.54	0.49051	1	34	21.64	0.00567	0.170881900452489	8	10.77	0.85035	1
GO:0032956	regulation of actin cytoskeleton organiz...	35	26.01	0.0392	0.592135748898678	8	9.76	0.76773	1	23	12.54	0.00336	0.128565269461078	7	6.1	0.41076	1
GO:0035051	cardiocyte differentiation	20	13.35	0.03962	0.592135748898678	5	4.94	0.55486	1	12	6.23	0.02087	0.31100979020979	3	3.03	0.58957	1
GO:0042551	neuron maturation	8	4.03	0.03978	0.592135748898678	0	1.46	1	1	6	1.89	0.0096	0.229707434944238	2	0.87	0.21624	1
GO:0042755	eating behavior	7	3.34	0.04007	0.592135748898678	1	1.22	0.71629	1	5	1.47	0.01319	0.261751863354037	1	0.68	0.5016	1
GO:0045104	intermediate filament cytoskeleton organ...	8	4.03	0.03978	0.592135748898678	6	1.59	0.00404	1	0	1.68	1	1	2	0.83	0.20218	1
GO:0046785	microtubule polymerization	7	3.34	0.04007	0.592135748898678	3	1.22	0.11907	1	4	1.54	0.06364	0.492865496368039	1	0.72	0.52053	1
GO:0070265	necrotic cell death	7	3.34	0.04007	0.592135748898678	5	1.46	0.0134	1	0	1.47	1	1	1	0.8	0.55627	1
GO:0007204	positive regulation of cytosolic calcium...	33	24.34	0.04033	0.593363969298246	10	9.33	0.45779	1	18	10.72	0.02069	0.31100979020979	6	5.46	0.4662	1
GO:0010721	negative regulation of cell development	23	15.86	0.0403	0.593363969298246	7	5.85	0.36945	1	14	7.49	0.01691	0.286617771883289	2	3.53	0.87315	1
GO:0010522	regulation of calcium ion transport into...	13	7.79	0.04073	0.596632248908297	4	3.05	0.36412	1	9	3.43	0.00628	0.177562831858407	2	1.86	0.55957	1
GO:0045744	negative regulation of G-protein coupled...	13	7.79	0.04073	0.596632248908297	4	2.81	0.30769	1	8	3.57	0.0243	0.339032751091703	2	1.71	0.51338	1
GO:0007169	transmembrane receptor protein tyrosine ...	97	82.07	0.04131	0.60381	21	30.8	0.97994	1	62	37.75	6.2e-05	0.0103223076923077	18	18.43	0.5767	1
GO:0030282	bone mineralization	17	10.99	0.04184	0.610227304347826	4	4.33	0.63656	1	8	5.18	0.14484	0.688636607142857	6	2.69	0.0518	1
GO:0051701	interaction with host	18	11.82	0.04264	0.620546117136659	9	4.51	0.03526	1	7	5.32	0.28196	0.861801018600531	3	2.54	0.46956	1
GO:0002695	negative regulation of leukocyte activat...	19	12.66	0.04323	0.626414838012959	5	4.82	0.53228	1	9	5.18	0.07253	0.524353768278965	6	2.5	0.03836	1
GO:0050905	neuromuscular process	19	12.66	0.04323	0.626414838012959	6	4.88	0.36197	1	11	5.95	0.03435	0.399084545454545	3	2.92	0.56344	1
GO:0008217	regulation of blood pressure	26	18.5	0.04345	0.626894731182796	12	6.95	0.04476	1	10	8.19	0.30321	0.861801018600531	3	4.06	0.77743	1
GO:1901698	response to nitrogen compound	107	91.53	0.04341	0.626894731182796	36	33.85	0.37341	1	52	41.39	0.05002	0.455959771754636	26	20.02	0.10195	1
GO:0045619	regulation of lymphocyte differentiation	20	13.49	0.04363	0.627945160599572	4	5.06	0.7536	1	10	5.67	0.05561	0.484588279301746	7	2.69	0.0176	1
GO:2000021	regulation of ion homeostasis	25	17.67	0.04371	0.627945160599572	6	6.71	0.66932	1	14	7.63	0.01962	0.305818248175182	5	3.79	0.32935	1
GO:1902533	positive regulation of intracellular sig...	93	78.59	0.04384	0.628467008547009	26	29.09	0.75524	1	46	35.09	0.03448	0.399867876588022	23	16.68	0.07299	1
GO:0046849	bone remodeling	15	9.46	0.04433	0.634136396588486	5	3.54	0.27845	1	8	4.06	0.04784	0.441759537572254	2	1.97	0.59211	1
GO:0001817	regulation of cytokine production	65	53	0.0445	0.635213829787234	26	20.25	0.1127	1	23	22.48	0.4863	0.944228805834093	16	10.88	0.07896	1
GO:0051049	regulation of transport	159	140.49	0.04507	0.641984352441614	55	53.49	0.43368	1	81	62.68	0.00887	0.222271764705882	29	30.82	0.66539	1
GO:0008053	mitochondrial fusion	5	2.09	0.0466	0.644617319587629	4	0.85	0.00839	1	1	0.98	0.63838	1	0	0.49	1	1
GO:0023051	regulation of signaling	311	286.27	0.04574	0.644617319587629	95	106	0.89892	1	161	130.47	0.00162	0.0848508196721311	65	62.1	0.36106	1
GO:0032801	receptor catabolic process	5	2.09	0.0466	0.644617319587629	1	0.85	0.58588	1	4	0.98	0.01355	0.263298795180723	0	0.49	1	1
GO:0033006	regulation of mast cell activation invol...	5	2.09	0.0466	0.644617319587629	2	0.79	0.18605	1	4	0.91	0.01024	0.234529032258065	0	0.45	1	1
GO:0042220	response to cocaine	9	4.87	0.0458	0.644617319587629	2	1.77	0.5354	1	5	2.24	0.06951	0.511713547646384	3	1.1	0.0956	1
GO:0043268	positive regulation of potassium ion tra...	5	2.09	0.0466	0.644617319587629	1	0.85	0.58588	1	3	0.91	0.05771	0.484588279301746	2	0.49	0.08488	1
GO:0043496	regulation of protein homodimerization a...	5	2.09	0.0466	0.644617319587629	2	0.85	0.20879	1	2	1.05	0.28334	0.861801018600531	1	0.57	0.44021	1
GO:0044712	single-organism catabolic process	183	163.31	0.04551	0.644617319587629	61	58.98	0.40854	1	85	72.48	0.06371	0.492865496368039	42	34.42	0.09967	1
GO:0045576	mast cell activation	9	4.87	0.0458	0.644617319587629	3	1.95	0.30968	1	7	2.17	0.00479	0.158591191709845	0	1.1	1	1
GO:0046850	regulation of bone remodeling	9	4.87	0.0458	0.644617319587629	4	1.83	0.10706	1	4	2.24	0.18282	0.739379620253165	0	1.06	1	1
GO:0048266	behavioral response to pain	5	2.09	0.0466	0.644617319587629	2	0.91	0.23178	1	2	0.91	0.22991	0.807253669222344	0	0.49	1	1
GO:0050655	dermatan sulfate proteoglycan metabolic ...	5	2.09	0.0466	0.644617319587629	2	0.73	0.16371	1	2	1.05	0.28334	0.861801018600531	2	0.53	0.09662	1
GO:0051154	negative regulation of striated muscle c...	5	2.09	0.0466	0.644617319587629	1	0.85	0.58588	1	2	0.98	0.2566	0.846065015479876	2	0.49	0.08488	1
GO:1902531	regulation of intracellular signal trans...	173	153.85	0.04588	0.644617319587629	57	57.02	0.52324	1	86	69.54	0.0206	0.31100979020979	35	33.25	0.39949	1
GO:0031345	negative regulation of cell projection o...	18	11.96	0.04718	0.648628319672131	5	4.33	0.43756	1	12	5.6	0.00937	0.229707434944238	1	2.65	0.93386	1
GO:0034109	homotypic cell-cell adhesion	11	6.4	0.04715	0.648628319672131	2	2.32	0.68318	1	8	3.08	0.01038	0.235206382978723	2	1.44	0.42531	1
GO:0070371	ERK1 and ERK2 cascade	26	18.64	0.04705	0.648628319672131	4	6.77	0.91351	1	15	8.19	0.01632	0.283382608695652	7	3.94	0.09954	1
GO:0000003	reproduction	144	126.72	0.04898	0.649769291338583	44	47.08	0.70804	1	67	55.54	0.05894	0.484588279301746	34	27.03	0.09592	1
GO:0001710	mesodermal cell fate commitment	6	2.78	0.04918	0.649769291338583	1	1.1	0.67816	1	4	1.33	0.03976	0.423444	1	0.64	0.48192	1
GO:0002090	regulation of receptor internalization	6	2.78	0.04918	0.649769291338583	0	1.04	1	1	6	1.33	0.00142	0.0775538461538462	0	0.64	1	1
GO:0006111	regulation of gluconeogenesis	7	3.48	0.0492	0.649769291338583	2	1.4	0.4136	1	3	1.68	0.23435	0.813414720260728	2	0.87	0.21624	1
GO:0007040	lysosome organization	8	4.17	0.04786	0.649769291338583	3	1.4	0.16226	1	2	1.82	0.55242	0.987402461538462	4	0.87	0.01015	1
GO:0032312	regulation of ARF GTPase activity	7	3.48	0.0492	0.649769291338583	2	1.16	0.32421	1	6	1.61	0.00416	0.141395744680851	1	0.68	0.5016	1
GO:0032320	positive regulation of Ras GTPase activi...	20	13.63	0.04793	0.649769291338583	5	4.57	0.48569	1	11	6.23	0.04582	0.436804796511628	4	2.96	0.34286	1
GO:0033687	osteoblast proliferation	6	2.78	0.04918	0.649769291338583	3	1.1	0.0931	1	1	1.4	0.76625	1	2	0.68	0.14739	1
GO:0034767	positive regulation of ion transmembrane...	6	2.78	0.04918	0.649769291338583	2	1.04	0.27809	1	4	1.05	0.01748	0.288623255813953	0	0.53	1	1
GO:0043436	oxoacid metabolic process	131	114.34	0.0475	0.649769291338583	51	41.78	0.07734	1	49	49.93	0.57924	1	31	23.69	0.07372	1
GO:0045103	intermediate filament-based process	8	4.17	0.04786	0.649769291338583	6	1.65	0.00494	1	0	1.75	1	1	2	0.87	0.21624	1
GO:0046579	positive regulation of Ras protein signa...	7	3.48	0.0492	0.649769291338583	1	1.22	0.71629	1	5	1.54	0.0161	0.282210410958904	1	0.72	0.52053	1
GO:0048519	negative regulation of biological proces...	438	410.35	0.04846	0.649769291338583	155	154.36	0.49199	1	217	187.69	0.00615	0.176513004484305	78	90.8	0.95329	1
GO:0071216	cellular response to biotic stimulus	22	15.3	0.04805	0.649769291338583	8	5.67	0.20587	1	9	6.3	0.17757	0.729988043478261	5	2.96	0.17341	1
GO:0071353	cellular response to interleukin-4	6	2.78	0.04918	0.649769291338583	2	0.91	0.23178	1	4	1.19	0.02727	0.358179754601227	1	0.49	0.39515	1
GO:0071514	genetic imprinting	6	2.78	0.04918	0.649769291338583	0	0.85	1	1	4	1.4	0.04703	0.436804796511628	2	0.57	0.10879	1
GO:0090075	relaxation of muscle	6	2.78	0.04918	0.649769291338583	3	1.1	0.0931	1	3	1.4	0.16101	0.708529181004818	0	0.76	1	1
GO:2000249	regulation of actin cytoskeleton reorgan...	6	2.78	0.04918	0.649769291338583	0	0.91	1	1	4	1.33	0.03976	0.423444	3	0.57	0.01751	1
GO:2000677	regulation of transcription regulatory r...	6	2.78	0.04918	0.649769291338583	1	0.98	0.63492	1	4	1.33	0.03976	0.423444	1	0.61	0.46147	1
GO:2001020	regulation of response to DNA damage sti...	20	13.63	0.04793	0.649769291338583	7	5.25	0.27017	1	8	6.16	0.27374	0.861801018600531	5	3.18	0.21308	1
GO:0021987	cerebral cortex development	15	9.6	0.04965	0.654424066797642	3	3.6	0.70669	1	11	4.62	0.00572	0.170881900452489	1	2.2	0.89448	1
GO:0030098	lymphocyte differentiation	39	30.05	0.05034	0.662217764705882	9	11.1	0.78763	1	20	13.03	0.03621	0.405426962457338	11	6.44	0.05833	1
GO:0032092	positive regulation of protein binding	10	5.7	0.0505	0.663022504892368	3	1.89	0.29265	1	5	2.66	0.12375	0.637799060297572	2	1.1	0.30147	1
GO:0000185	activation of MAPKKK activity	4	1.53	0.05479	0.666857117263844	3	0.37	0.00393	1	2	0.77	0.1773	0.729988043478261	0	0.23	1	1
GO:0001666	response to hypoxia	38	29.49	0.0579	0.666857117263844	17	11.16	0.05443	1	16	14.01	0.32654	0.874768965517241	9	6.9	0.25366	1
GO:0001678	cellular glucose homeostasis	15	9.74	0.05539	0.666857117263844	4	3.42	0.44806	1	8	4.69	0.09488	0.577838571428571	3	2.2	0.37813	1
GO:0001696	gastric acid secretion	4	1.53	0.05479	0.666857117263844	1	0.55	0.43254	1	2	0.63	0.12709	0.637799060297572	1	0.3	0.26605	1
GO:0001819	positive regulation of cytokine producti...	39	30.46	0.06007	0.666857117263844	17	11.34	0.06157	1	11	12.96	0.75615	1	10	6.1	0.08532	1
GO:0002283	neutrophil activation involved in immune...	4	1.53	0.05479	0.666857117263844	2	0.67	0.14189	1	2	0.7	0.15178	0.692272805139186	0	0.38	1	1
GO:0002376	immune system process	265	243.57	0.05975	0.666857117263844	85	90.75	0.76689	1	124	105.26	0.02477	0.341702542372881	56	50.5	0.21651	1
GO:0002520	immune system development	90	76.92	0.05892	0.666857117263844	22	29.09	0.93649	1	50	34.53	0.00489	0.160241538461538	21	16.95	0.18131	1
GO:0002524	hypersensitivity	3	0.97	0.06091	0.666857117263844	NA	NA	NA	NA	2	0.35	0.04249	0.423710747663551	NA	NA	NA	NA
GO:0002634	regulation of germinal center formation	3	0.97	0.06091	0.666857117263844	1	0.37	0.31454	1	1	0.49	0.39854	0.896399366420275	1	0.27	0.2371	1
GO:0002819	regulation of adaptive immune response	18	12.1	0.05206	0.666857117263844	7	4.76	0.19699	1	12	4.83	0.00277	0.118002	2	2.43	0.70422	1
GO:0002831	regulation of response to biotic stimulu...	19	12.94	0.05238	0.666857117263844	6	4.94	0.37305	1	7	5.67	0.33902	0.874768965517241	6	2.69	0.0518	1
GO:0002902	regulation of B cell apoptotic process	4	1.53	0.05479	0.666857117263844	1	0.61	0.46718	1	1	0.7	0.51635	0.963069614711033	2	0.34	0.04325	1
GO:0003306	Wnt signaling pathway involved in heart ...	4	1.53	0.05479	0.666857117263844	1	0.67	0.49971	1	2	0.63	0.12709	0.637799060297572	1	0.38	0.3207	1
GO:0003307	regulation of Wnt signaling pathway invo...	3	0.97	0.06091	0.666857117263844	1	0.43	0.35637	1	1	0.42	0.35322	0.874768965517241	1	0.27	0.2371	1
GO:0006082	organic acid metabolic process	132	116.43	0.06091	0.666857117263844	51	42.39	0.09356	1	50	50.84	0.57327	1	31	24	0.0838	1
GO:0006109	regulation of carbohydrate metabolic pro...	21	14.74	0.05724	0.666857117263844	6	5.73	0.51494	1	12	6.79	0.03785	0.410630730050934	5	3.45	0.26253	1
GO:0006305	DNA alkylation	10	5.84	0.05835	0.666857117263844	3	2.2	0.37777	1	3	2.87	0.55516	0.990084398548702	4	1.36	0.04606	1
GO:0006306	DNA methylation	10	5.84	0.05835	0.666857117263844	3	2.2	0.37777	1	3	2.87	0.55516	0.990084398548702	4	1.36	0.04606	1
GO:0006732	coenzyme metabolic process	30	22.26	0.052	0.666857117263844	14	7.99	0.02847	1	13	9.8	0.1815	0.738246339910885	5	4.7	0.50895	1
GO:0006865	amino acid transport	22	15.44	0.05236	0.666857117263844	4	5.98	0.85637	1	10	7.21	0.18367	0.740941477272727	8	3.68	0.03053	1
GO:0006878	cellular copper ion homeostasis	3	0.97	0.06091	0.666857117263844	1	0.37	0.31454	1	2	0.42	0.06082	0.484588279301746	0	0.19	1	1
GO:0007130	synaptonemal complex assembly	4	1.53	0.05479	0.666857117263844	1	0.49	0.39565	1	3	0.63	0.02088	0.31100979020979	0	0.27	1	1
GO:0007185	transmembrane receptor protein tyrosine ...	3	0.97	0.06091	0.666857117263844	1	0.37	0.31454	1	2	0.49	0.08128	0.537317342799189	0	0.23	1	1
GO:0007194	negative regulation of adenylate cyclase...	6	2.92	0.06103	0.666857117263844	4	1.22	0.03038	1	2	1.4	0.4135	0.915545738045738	1	0.76	0.53875	1
GO:0007423	sensory organ development	70	58.56	0.06087	0.666857117263844	24	22.5	0.40165	1	35	27.31	0.0766	0.537317342799189	14	13.34	0.46621	1
GO:0007626	locomotory behavior	29	21.42	0.05277	0.666857117263844	13	8.17	0.06489	1	14	10.29	0.14852	0.692272805139186	6	5.04	0.39158	1
GO:0009396	folic acid-containing compound biosynthe...	3	0.97	0.06091	0.666857117263844	2	0.37	0.04727	1	1	0.42	0.35322	0.874768965517241	1	0.19	0.17576	1
GO:0009952	anterior/posterior pattern specification	34	25.73	0.05204	0.666857117263844	11	9.82	0.39334	1	23	12.33	0.00271	0.117802040816327	4	5.99	0.85538	1
GO:0009968	negative regulation of signal transducti...	111	96.54	0.05914	0.666857117263844	33	36.35	0.74767	1	55	44.82	0.06388	0.493240168878167	26	21.87	0.20403	1
GO:0010543	regulation of platelet activation	7	3.62	0.05954	0.666857117263844	1	1.46	0.77955	1	6	1.54	0.00326	0.126250909090909	1	0.87	0.58936	1
GO:0010575	positive regulation vascular endothelial...	5	2.23	0.06027	0.666857117263844	0	0.91	1	1	4	0.98	0.01355	0.263298795180723	1	0.53	0.41811	1
GO:0010648	negative regulation of cell communicatio...	117	102.24	0.06013	0.666857117263844	34	38.48	0.80263	1	58	47.48	0.06241	0.492865496368039	28	23.16	0.16977	1
GO:0015858	nucleoside transport	4	1.53	0.05479	0.666857117263844	3	0.61	0.01962	1	0	0.63	1	1	1	0.34	0.2939	1
GO:0019220	regulation of phosphate metabolic proces...	200	180.97	0.05914	0.666857117263844	80	67.33	0.05477	1	95	82.29	0.07106	0.5159925	34	39.58	0.85326	1
GO:0019752	carboxylic acid metabolic process	116	100.71	0.05251	0.666857117263844	45	36.84	0.09202	1	43	43.84	0.5781	1	29	20.93	0.04562	1
GO:0019883	antigen processing and presentation of e...	4	1.53	0.05479	0.666857117263844	2	0.43	0.06356	1	3	0.77	0.03694	0.405426962457338	1	0.27	0.2371	1
GO:0021799	cerebral cortex radially oriented cell m...	6	2.92	0.06103	0.666857117263844	1	1.04	0.65722	1	5	1.4	0.01065	0.237120209059233	0	0.61	1	1
GO:0022414	reproductive process	132	116.29	0.05915	0.666857117263844	39	43.36	0.78327	1	64	50.91	0.03185	0.388877142857143	30	24.76	0.15627	1
GO:0023057	negative regulation of signaling	117	101.96	0.05646	0.666857117263844	34	38.36	0.79688	1	58	47.34	0.05967	0.484588279301746	28	23.05	0.16333	1
GO:0030217	T cell differentiation	29	21.42	0.05277	0.666857117263844	6	7.93	0.81254	1	17	9.38	0.01217	0.248454632587859	6	4.59	0.3101	1
GO:0030334	regulation of cell migration	68	56.48	0.05642	0.666857117263844	21	21.04	0.53699	1	38	25.49	0.00844	0.213673517786561	12	12.25	0.57138	1
GO:0030534	adult behavior	24	17.11	0.05177	0.666857117263844	7	6.1	0.41007	1	14	8.19	0.03378	0.394011131386861	5	3.79	0.32935	1
GO:0030814	regulation of cAMP metabolic process	19	13.08	0.05744	0.666857117263844	10	5.06	0.02896	1	5	5.81	0.69949	1	5	3	0.17981	1
GO:0030825	positive regulation of cGMP metabolic pr...	4	1.53	0.05479	0.666857117263844	1	0.55	0.43254	1	3	0.77	0.03694	0.405426962457338	0	0.38	1	1
GO:0031284	positive regulation of guanylate cyclase...	3	0.97	0.06091	0.666857117263844	0	0.37	1	1	3	0.42	0.00583	0.170881900452489	0	0.19	1	1
GO:0031347	regulation of defense response	71	59.26	0.05699	0.666857117263844	26	22.08	0.21814	1	34	25.42	0.04976	0.454237714285714	15	12.13	0.2334	1
GO:0032269	negative regulation of cellular protein ...	67	55.5	0.05541	0.666857117263844	27	21.16	0.1138	1	36	26.33	0.03379	0.394011131386861	9	12.81	0.90034	1
GO:0032460	negative regulation of protein oligomeri...	3	0.97	0.06091	0.666857117263844	1	0.37	0.31454	1	2	0.49	0.08128	0.537317342799189	0	0.23	1	1
GO:0032930	positive regulation of superoxide anion ...	3	0.97	0.06091	0.666857117263844	1	0.37	0.31454	1	2	0.49	0.08128	0.537317342799189	0	0.23	1	1
GO:0032990	cell part morphogenesis	106	91.25	0.05111	0.666857117263844	28	33.67	0.8721	1	67	44.12	0.00033	0.0334714285714286	13	20.78	0.97802	1
GO:0033008	positive regulation of mast cell activat...	3	0.97	0.06091	0.666857117263844	2	0.37	0.04727	1	2	0.42	0.06082	0.484588279301746	0	0.23	1	1
GO:0034694	response to prostaglandin	5	2.23	0.06027	0.666857117263844	1	0.79	0.55894	1	3	0.91	0.05771	0.484588279301746	0	0.45	1	1
GO:0034695	response to prostaglandin E	4	1.53	0.05479	0.666857117263844	1	0.49	0.39565	1	2	0.63	0.12709	0.637799060297572	0	0.3	1	1
GO:0034765	regulation of ion transmembrane transpor...	26	18.92	0.05489	0.666857117263844	12	7.07	0.05002	1	13	8.54	0.08464	0.544662235649547	3	4.25	0.80315	1
GO:0035150	regulation of tube size	22	15.44	0.05236	0.666857117263844	7	5.92	0.37959	1	10	7.07	0.16862	0.723270805369127	5	3.56	0.2845	1
GO:0035176	social behavior	8	4.31	0.05694	0.666857117263844	2	1.34	0.39175	1	6	2.1	0.01612	0.282210410958904	1	0.87	0.58936	1
GO:0038083	peptidyl-tyrosine autophosphorylation	3	0.97	0.06091	0.666857117263844	0	0.37	1	1	3	0.49	0.00967	0.229707434944238	0	0.23	1	1
GO:0042060	wound healing	91	77.9	0.0596	0.666857117263844	20	29.34	0.97752	1	49	35.16	0.01074	0.23829375	24	17.4	0.0679	1
GO:0042069	regulation of catecholamine metabolic pr...	4	1.53	0.05479	0.666857117263844	1	0.55	0.43254	1	2	0.77	0.1773	0.729988043478261	2	0.42	0.06287	1
GO:0042661	regulation of mesodermal cell fate speci...	3	0.97	0.06091	0.666857117263844	0	0.37	1	1	2	0.49	0.08128	0.537317342799189	1	0.23	0.20702	1
GO:0042692	muscle cell differentiation	45	35.47	0.05262	0.666857117263844	13	13.23	0.56809	1	26	16.32	0.01216	0.248454632587859	8	8.04	0.5567	1
GO:0042761	very long-chain fatty acid biosynthetic ...	3	0.97	0.06091	0.666857117263844	1	0.3	0.27	1	2	0.49	0.08128	0.537317342799189	0	0.19	1	1
GO:0043088	regulation of Cdc42 GTPase activity	4	1.53	0.05479	0.666857117263844	2	0.55	0.10055	1	2	0.56	0.10349	0.586780035492458	0	0.27	1	1
GO:0043112	receptor metabolic process	20	13.91	0.05742	0.666857117263844	5	5.12	0.58769	1	15	6.23	0.00121	0.0743451923076923	0	2.92	1	1
GO:0043254	regulation of protein complex assembly	35	26.85	0.05796	0.666857117263844	13	10.73	0.27695	1	19	12.61	0.04735	0.439138606676343	6	6.56	0.64591	1
GO:0043299	leukocyte degranulation	9	5.01	0.05382	0.666857117263844	4	2.01	0.13906	1	6	2.24	0.02185	0.319789795918367	0	1.14	1	1
GO:0043306	positive regulation of mast cell degranu...	3	0.97	0.06091	0.666857117263844	2	0.37	0.04727	1	2	0.42	0.06082	0.484588279301746	0	0.23	1	1
GO:0043406	positive regulation of MAP kinase activi...	30	22.4	0.05573	0.666857117263844	9	8.48	0.47627	1	18	10.36	0.01518	0.27556875	5	5	0.56495	1
GO:0045637	regulation of myeloid cell differentiati...	26	18.92	0.05489	0.666857117263844	8	7.32	0.45036	1	14	8.26	0.03597	0.405426962457338	5	4.06	0.38242	1
GO:0045921	positive regulation of exocytosis	8	4.31	0.05694	0.666857117263844	2	1.65	0.49674	1	7	1.96	0.00259	0.114138620689655	0	1.02	1	1
GO:0048265	response to pain	8	4.31	0.05694	0.666857117263844	4	1.83	0.10706	1	2	2.03	0.61265	1	1	1.1	0.67457	1
GO:0048339	paraxial mesoderm development	5	2.23	0.06027	0.666857117263844	2	0.91	0.23178	1	2	0.98	0.2566	0.846065015479876	1	0.49	0.39515	1
GO:0048532	anatomical structure arrangement	4	1.53	0.05479	0.666857117263844	1	0.61	0.46718	1	2	0.63	0.12709	0.637799060297572	1	0.3	0.26605	1
GO:0048598	embryonic morphogenesis	77	64.82	0.05776	0.666857117263844	27	24.58	0.33289	1	42	31.02	0.02681	0.358179754601227	11	15.28	0.9041	1
GO:0048858	cell projection morphogenesis	104	89.72	0.05549	0.666857117263844	27	33.06	0.88942	1	67	43.42	0.00021	0.02485	12	20.43	0.98655	1
GO:0050687	negative regulation of defense response ...	4	1.53	0.05479	0.666857117263844	3	0.61	0.01962	1	1	0.77	0.55025	0.987402461538462	0	0.42	1	1
GO:0050880	regulation of blood vessel size	22	15.44	0.05236	0.666857117263844	7	5.92	0.37959	1	10	7.07	0.16862	0.723270805369127	5	3.56	0.2845	1
GO:0050884	neuromuscular process controlling postur...	4	1.53	0.05479	0.666857117263844	3	0.61	0.01962	1	1	0.7	0.51635	0.963069614711033	0	0.34	1	1
GO:0051051	negative regulation of transport	48	38.39	0.05761	0.666857117263844	21	14.33	0.05024	1	25	17.58	0.04679	0.436804796511628	6	8.57	0.86371	1
GO:0051345	positive regulation of hydrolase activit...	70	58.14	0.05371	0.666857117263844	18	21.22	0.79981	1	40	25.98	0.00405	0.139889189189189	12	12.59	0.61011	1
GO:0051347	positive regulation of transferase activ...	68	56.61	0.05886	0.666857117263844	26	20.92	0.1468	1	36	26.05	0.02943	0.369465029469548	9	12.36	0.87652	1
GO:0051497	negative regulation of stress fiber asse...	3	0.97	0.06091	0.666857117263844	0	0.37	1	1	3	0.49	0.00967	0.229707434944238	0	0.23	1	1
GO:0051703	intraspecies interaction between organis...	8	4.31	0.05694	0.666857117263844	2	1.34	0.39175	1	6	2.1	0.01612	0.282210410958904	1	0.87	0.58936	1
GO:0051938	L-glutamate import	3	0.97	0.06091	0.666857117263844	1	0.37	0.31454	1	2	0.49	0.08128	0.537317342799189	0	0.27	1	1
GO:0052652	cyclic purine nucleotide metabolic proce...	22	15.58	0.05695	0.666857117263844	11	5.79	0.02941	1	10	6.86	0.14722	0.692272805139186	3	3.45	0.67646	1
GO:0055078	sodium ion homeostasis	8	4.31	0.05694	0.666857117263844	3	1.65	0.22557	1	2	1.54	0.46235	0.943680638297872	3	0.8	0.04331	1
GO:0060074	synapse maturation	5	2.23	0.06027	0.666857117263844	1	0.67	0.49971	1	3	1.12	0.09684	0.579950890346767	1	0.42	0.34648	1
GO:0060402	calcium ion transport into cytosol	18	12.1	0.05206	0.666857117263844	4	4.64	0.68928	1	12	5.25	0.00559	0.170881900452489	3	2.73	0.51772	1
GO:0060526	prostate glandular acinus morphogenesis	3	0.97	0.06091	0.666857117263844	2	0.37	0.04727	1	0	0.42	1	1	1	0.27	0.2371	1
GO:0060527	prostate epithelial cord arborization in...	3	0.97	0.06091	0.666857117263844	2	0.37	0.04727	1	0	0.42	1	1	1	0.27	0.2371	1
GO:0061515	myeloid cell development	7	3.62	0.05954	0.666857117263844	1	1.22	0.71629	1	4	1.68	0.08291	0.537317342799189	3	0.8	0.04331	1
GO:0070884	regulation of calcineurin-NFAT signaling...	3	0.97	0.06091	0.666857117263844	1	0.43	0.35637	1	NA	NA	NA	NA	2	0.19	0.01328	1
GO:0071398	cellular response to fatty acid	6	2.92	0.06103	0.666857117263844	2	1.1	0.30121	1	3	1.33	0.14391	0.687151680358477	1	0.72	0.52053	1
GO:0071867	response to monoamine	5	2.23	0.06027	0.666857117263844	1	0.79	0.55894	1	4	1.05	0.01748	0.288623255813953	0	0.61	1	1
GO:0071869	response to catecholamine	5	2.23	0.06027	0.666857117263844	1	0.79	0.55894	1	4	1.05	0.01748	0.288623255813953	0	0.61	1	1
GO:0071888	macrophage apoptotic process	3	0.97	0.06091	0.666857117263844	1	0.3	0.27	1	2	0.49	0.08128	0.537317342799189	0	0.23	1	1
GO:0098586	cellular response to virus	5	2.23	0.06027	0.666857117263844	1	0.91	0.61117	1	3	1.05	0.08281	0.537317342799189	1	0.53	0.41811	1
GO:1900006	positive regulation of dendrite developm...	3	0.97	0.06091	0.666857117263844	0	0.3	1	1	3	0.49	0.00967	0.229707434944238	0	0.19	1	1
GO:1901293	nucleoside phosphate biosynthetic proces...	43	33.66	0.05201	0.666857117263844	18	12.38	0.07025	1	17	15.34	0.36534	0.892060603744746	11	7.47	0.1285	1
GO:1901615	organic hydroxy compound metabolic proce...	64	52.86	0.05711	0.666857117263844	21	19.94	0.4355	1	27	22.2	0.16739	0.723270805369127	19	10.92	0.01329	1
GO:1902170	cellular response to reactive nitrogen s...	3	0.97	0.06091	0.666857117263844	1	0.43	0.35637	1	2	0.42	0.06082	0.484588279301746	0	0.23	1	1
GO:1902186	regulation of viral release from host ce...	4	1.53	0.05479	0.666857117263844	3	0.61	0.01962	1	2	0.7	0.15178	0.692272805139186	0	0.34	1	1
GO:0000302	response to reactive oxygen species	23	16.55	0.06125	0.668172764227642	8	6.22	0.28273	1	12	7.49	0.07043	0.513312998859749	3	3.6	0.70449	1
GO:0002706	regulation of lymphocyte mediated immuni...	15	9.88	0.06158	0.669595170178282	6	3.84	0.18457	1	9	3.92	0.01499	0.273674571428571	2	1.93	0.58146	1
GO:0051099	positive regulation of binding	15	9.88	0.06158	0.669595170178282	4	3.54	0.47534	1	7	4.48	0.15886	0.706904874651811	4	2.01	0.14048	1
GO:0007265	Ras protein signal transduction	59	48.55	0.06179	0.669707770597738	13	17.69	0.90667	1	34	22.34	0.00913	0.226126744186047	15	10.65	0.11417	1
GO:0034103	regulation of tissue remodeling	11	6.68	0.06175	0.669707770597738	6	2.38	0.02935	1	4	2.87	0.32271	0.874768965517241	0	1.29	1	1
GO:0002449	lymphocyte mediated immunity	27	20.03	0.06267	0.670153370429253	8	7.44	0.46903	1	15	7.84	0.01119	0.243211224489796	6	3.68	0.16198	1
GO:0002699	positive regulation of immune effector p...	19	13.21	0.06283	0.670153370429253	7	5.06	0.24183	1	13	5.53	0.00312	0.122311656441718	2	2.65	0.74997	1
GO:0006081	cellular aldehyde metabolic process	9	5.15	0.0627	0.670153370429253	0	1.89	1	1	2	1.68	0.50873	0.963069614711033	4	0.83	0.00864	1
GO:0008542	visual learning	9	5.15	0.0627	0.670153370429253	2	1.89	0.57198	1	6	2.31	0.02517	0.341702542372881	1	1.06	0.6617	1
GO:0009165	nucleotide biosynthetic process	42	33.25	0.06281	0.670153370429253	18	12.26	0.06515	1	16	15.13	0.44543	0.930705588235294	11	7.39	0.12215	1
GO:0017157	regulation of exocytosis	16	10.71	0.06229	0.670153370429253	4	3.96	0.56612	1	13	4.9	0.001	0.0658762886597938	0	2.39	1	1
GO:0031334	positive regulation of protein complex a...	20	14.05	0.06262	0.670153370429253	8	5.61	0.19788	1	9	6.58	0.21118	0.783266395821242	5	3.41	0.2553	1
GO:0035137	hindlimb morphogenesis	9	5.15	0.0627	0.670153370429253	3	1.95	0.30968	1	5	2.59	0.11362	0.615803053435115	2	1.29	0.37141	1
GO:0043200	response to amino acid	16	10.71	0.06229	0.670153370429253	6	3.9	0.19398	1	8	5.04	0.12943	0.64113	4	2.39	0.21586	1
GO:0070252	actin-mediated cell contraction	16	10.71	0.06229	0.670153370429253	5	3.78	0.32693	1	7	4.76	0.19695	0.761446924428822	4	2.2	0.17679	1
GO:0010243	response to organonitrogen compound	100	86.52	0.06319	0.672923349206349	33	32.02	0.45445	1	51	39.08	0.02906	0.365538188976378	24	18.96	0.13772	1
GO:0002698	negative regulation of immune effector p...	12	7.51	0.06427	0.681180774091627	6	3.05	0.08204	1	6	3.15	0.09198	0.574537829912024	2	1.63	0.48912	1
GO:0006970	response to osmotic stress	12	7.51	0.06427	0.681180774091627	4	2.62	0.26598	1	5	3.08	0.1923	0.760394183168317	3	1.52	0.19258	1
GO:0072332	intrinsic apoptotic signaling pathway by...	12	7.51	0.06427	0.681180774091627	5	2.81	0.14673	1	4	3.71	0.51404	0.963069614711033	3	1.78	0.26316	1
GO:0005977	glycogen metabolic process	13	8.35	0.0661	0.697271855345912	8	3.17	0.01273	1	3	3.43	0.67684	1	3	1.82	0.27353	1
GO:0007588	excretion	13	8.35	0.0661	0.697271855345912	4	3.05	0.36412	1	6	3.29	0.10809	0.604282677165354	4	1.55	0.06849	1
GO:0060047	heart contraction	28	21	0.06609	0.697271855345912	13	8.05	0.05893	1	15	9.87	0.06838	0.511713547646384	1	5	0.99414	1
GO:0001912	positive regulation of leukocyte mediate...	8	4.45	0.06705	0.698506909937888	3	1.71	0.2421	1	6	1.82	0.00793	0.20939132231405	1	0.87	0.58936	1
GO:0002711	positive regulation of T cell mediated i...	8	4.45	0.06705	0.698506909937888	4	1.65	0.07891	1	6	1.75	0.00647	0.182129074889868	0	0.83	1	1
GO:0010977	negative regulation of neuron projection...	8	4.45	0.06705	0.698506909937888	3	1.71	0.2421	1	4	2.17	0.16865	0.723270805369127	1	1.06	0.6617	1
GO:0030099	myeloid cell differentiation	44	35.19	0.06667	0.698506909937888	13	13.48	0.59507	1	23	15.76	0.043	0.424027777777778	11	7.7	0.14859	1
GO:0032844	regulation of homeostatic process	44	35.19	0.06667	0.698506909937888	11	13.23	0.77905	1	24	15.76	0.02546	0.34395221987315	8	7.62	0.49561	1
GO:0051480	cytosolic calcium ion homeostasis	34	26.29	0.06687	0.698506909937888	10	10.12	0.56304	1	19	11.7	0.02441	0.33950347826087	6	5.95	0.55091	1
GO:0080135	regulation of cellular response to stres...	52	42.43	0.06695	0.698506909937888	25	15.8	0.01513	1	18	19.47	0.67123	1	8	9.36	0.72542	1
GO:2000145	regulation of cell motility	71	59.81	0.06702	0.698506909937888	21	22.32	0.64793	1	41	27.1	0.00496	0.160885279187817	12	13.04	0.65904	1
GO:0001556	oocyte maturation	4	1.67	0.07342	0.7077995	2	0.67	0.14189	1	2	0.84	0.20341	0.761446924428822	1	0.45	0.37128	1
GO:0001916	positive regulation of T cell mediated c...	6	3.06	0.07444	0.7077995	3	1.16	0.10577	1	5	1.19	0.00506	0.161015346534653	0	0.57	1	1
GO:0002237	response to molecule of bacterial origin	37	29.07	0.07039	0.7077995	12	10.61	0.37254	1	16	12.26	0.16506	0.720303481228669	8	5.91	0.24005	1
GO:0002573	myeloid leukocyte differentiation	26	19.34	0.06834	0.7077995	8	7.38	0.45971	1	13	8.33	0.0726	0.524353768278965	6	4.02	0.2138	1
GO:0002694	regulation of leukocyte activation	51	41.73	0.07193	0.7077995	13	15.13	0.75377	1	27	17.86	0.02028	0.31100979020979	12	8.42	0.13739	1
GO:0002762	negative regulation of myeloid leukocyte...	7	3.76	0.07113	0.7077995	3	1.52	0.19326	1	4	1.54	0.06364	0.492865496368039	0	0.76	1	1
GO:0002822	regulation of adaptive immune response b...	16	10.99	0.0755	0.7077995	6	4.27	0.25384	1	11	4.34	0.00349	0.128908092485549	2	2.16	0.64229	1
GO:0003015	heart process	28	21.14	0.07071	0.7077995	13	8.11	0.06186	1	15	9.94	0.07177	0.520556526674234	1	5.04	0.99437	1
GO:0003128	heart field specification	4	1.67	0.07342	0.7077995	1	0.67	0.49971	1	3	0.77	0.03694	0.405426962457338	0	0.45	1	1
GO:0006027	glycosaminoglycan catabolic process	11	6.82	0.07005	0.7077995	6	2.38	0.02935	1	4	2.87	0.32271	0.874768965517241	2	1.25	0.35761	1
GO:0006066	alcohol metabolic process	51	41.73	0.07193	0.7077995	19	16.04	0.25343	1	21	17.37	0.21119	0.783266395821242	13	8.72	0.09782	1
GO:0006073	cellular glucan metabolic process	13	8.49	0.07378	0.7077995	8	3.23	0.01422	1	3	3.43	0.67684	1	3	1.82	0.27353	1
GO:0006164	purine nucleotide biosynthetic process	32	24.62	0.06972	0.7077995	13	9.09	0.1221	1	14	11.07	0.21659	0.789059350057013	8	5.5	0.18498	1
GO:0006493	protein O-linked glycosylation	14	9.32	0.07476	0.7077995	7	3.17	0.03729	1	3	3.85	0.75068	1	4	1.78	0.10151	1
GO:0006937	regulation of muscle contraction	24	17.81	0.07578	0.7077995	9	6.89	0.25145	1	15	8.68	0.02631	0.353938736842105	1	4.4	0.98903	1
GO:0006939	smooth muscle contraction	17	11.68	0.06887	0.7077995	5	4.45	0.46178	1	9	5.6	0.10592	0.594752899824253	3	2.81	0.53632	1
GO:0007010	cytoskeleton organization	116	102.24	0.07392	0.7077995	36	37.63	0.63702	1	66	47.2	0.00309	0.121883333333333	20	22.41	0.73558	1
GO:0007187	G-protein coupled receptor signaling pat...	25	18.64	0.07455	0.7077995	9	7.01	0.26773	1	9	8.89	0.53537	0.985381053843939	6	4.28	0.25754	1
GO:0009056	catabolic process	289	267.77	0.06881	0.7077995	111	97.77	0.07503	1	128	120.18	0.2228	0.805255656108597	58	56.83	0.45446	1
GO:0009152	purine ribonucleotide biosynthetic proce...	31	23.93	0.07573	0.7077995	12	8.78	0.16835	1	14	10.79	0.19039	0.758001308411215	8	5.35	0.16646	1
GO:0009886	post-embryonic morphogenesis	4	1.67	0.07342	0.7077995	1	0.67	0.49971	1	2	0.7	0.15178	0.692272805139186	2	0.38	0.05273	1
GO:0009887	organ morphogenesis	116	102.24	0.07392	0.7077995	41	38.06	0.32993	1	58	47.83	0.06964	0.511713547646384	20	23.09	0.78155	1
GO:0010638	positive regulation of organelle organiz...	43	34.5	0.07192	0.7077995	13	13.11	0.55435	1	21	16.39	0.14387	0.687151680358477	11	7.96	0.17397	1
GO:0010639	negative regulation of organelle organiz...	32	24.62	0.06972	0.7077995	12	9.45	0.23643	1	17	11.14	0.05287	0.474852387640449	5	5.57	0.66035	1
GO:0010677	negative regulation of cellular carbohyd...	6	3.06	0.07444	0.7077995	2	1.16	0.32421	1	3	1.54	0.19684	0.761446924428822	1	0.76	0.53875	1
GO:0010771	negative regulation of cell morphogenesi...	6	3.06	0.07444	0.7077995	2	1.1	0.30121	1	4	1.4	0.04703	0.436804796511628	1	0.64	0.48192	1
GO:0010827	regulation of glucose transport	15	10.02	0.06821	0.7077995	7	4.03	0.106	1	7	4.48	0.15886	0.706904874651811	3	2.43	0.43966	1
GO:0010906	regulation of glucose metabolic process	16	10.99	0.0755	0.7077995	6	4.33	0.26429	1	7	5.25	0.27083	0.861801018600531	4	2.65	0.2739	1
GO:0016338	calcium-independent cell-cell adhesion	6	3.06	0.07444	0.7077995	1	1.16	0.69783	1	1	1.47	0.78265	1	4	0.72	0.00501	1
GO:0019058	viral life cycle	39	31.02	0.07506	0.7077995	24	11.77	0.00067	1	14	13.94	0.53338	0.983068416498414	2	6.48	0.99005	1
GO:0019319	hexose biosynthetic process	14	9.32	0.07476	0.7077995	3	3.54	0.69561	1	4	4.06	0.58652	1	7	2.12	0.00496	1
GO:0022411	cellular component disassembly	57	47.16	0.07098	0.7077995	26	18.17	0.04112	1	22	20.94	0.43669	0.922374418604651	11	10.35	0.46208	1
GO:0030073	insulin secretion	30	22.95	0.07262	0.7077995	9	8.9	0.53634	1	16	10.5	0.06009	0.484588279301746	4	5.27	0.77849	1
GO:0030198	extracellular matrix organization	54	44.37	0.06993	0.7077995	18	16.53	0.38843	1	27	20.03	0.06868	0.511713547646384	12	9.44	0.23601	1
GO:0030502	negative regulation of bone mineralizati...	4	1.67	0.07342	0.7077995	0	0.61	1	1	3	0.77	0.03694	0.405426962457338	2	0.38	0.05273	1
GO:0031111	negative regulation of microtubule polym...	6	3.06	0.07444	0.7077995	1	1.22	0.71629	1	5	1.47	0.01319	0.261751863354037	0	0.76	1	1
GO:0031122	cytoplasmic microtubule organization	5	2.36	0.07596	0.7077995	0	0.79	1	1	4	1.12	0.02204	0.319789795918367	1	0.53	0.41811	1
GO:0031280	negative regulation of cyclase activity	6	3.06	0.07444	0.7077995	4	1.22	0.03038	1	2	1.4	0.4135	0.915545738045738	1	0.76	0.53875	1
GO:0031333	negative regulation of protein complex a...	14	9.32	0.07476	0.7077995	4	3.78	0.52822	1	10	4.41	0.01157	0.244633663366337	1	2.31	0.90611	1
GO:0031344	regulation of cell projection organizati...	49	40.06	0.0756	0.7077995	11	14.15	0.8453	1	33	18.7	0.00098	0.0658762886597938	5	8.49	0.93151	1
GO:0031365	N-terminal protein amino acid modificati...	5	2.36	0.07596	0.7077995	2	0.79	0.18605	1	2	1.12	0.30998	0.863834365460096	1	0.53	0.41811	1
GO:0032011	ARF protein signal transduction	9	5.29	0.07246	0.7077995	2	1.83	0.55395	1	8	2.45	0.0024	0.109672340425532	1	1.06	0.6617	1
GO:0032012	regulation of ARF protein signal transdu...	9	5.29	0.07246	0.7077995	2	1.83	0.55395	1	8	2.45	0.0024	0.109672340425532	1	1.06	0.6617	1
GO:0033674	positive regulation of kinase activity	66	55.36	0.07005	0.7077995	24	20.43	0.23316	1	36	25.49	0.02202	0.319789795918367	9	12.09	0.86062	1
GO:0034764	positive regulation of transmembrane tra...	6	3.06	0.07444	0.7077995	2	1.16	0.32421	1	4	1.19	0.02727	0.358179754601227	0	0.61	1	1
GO:0043046	DNA methylation involved in gamete gener...	4	1.67	0.07342	0.7077995	0	0.61	1	1	2	0.84	0.20341	0.761446924428822	2	0.38	0.05273	1
GO:0043062	extracellular structure organization	54	44.51	0.07317	0.7077995	18	16.53	0.38843	1	27	20.1	0.07102	0.5159925	12	9.44	0.23601	1
GO:0043084	penile erection	4	1.67	0.07342	0.7077995	1	0.55	0.43254	1	3	0.63	0.02088	0.31100979020979	1	0.23	0.20702	1
GO:0043583	ear development	32	24.62	0.06972	0.7077995	11	9.58	0.36176	1	17	11.7	0.07634	0.537317342799189	7	5.8	0.3607	1
GO:0044042	glucan metabolic process	13	8.49	0.07378	0.7077995	8	3.23	0.01422	1	3	3.43	0.67684	1	3	1.82	0.27353	1
GO:0045453	bone resorption	11	6.82	0.07005	0.7077995	4	2.38	0.21232	1	5	2.8	0.14519	0.688763251670379	2	1.29	0.37141	1
GO:0045580	regulation of T cell differentiation	16	10.85	0.06868	0.7077995	2	4.09	0.92172	1	9	4.55	0.03632	0.405426962457338	6	2.16	0.02028	1
GO:0045664	regulation of neuron differentiation	57	47.16	0.07098	0.7077995	15	17.2	0.74612	1	36	22.34	0.00297	0.121846583850932	6	10.35	0.95074	1
GO:0045736	negative regulation of cyclin-dependent ...	5	2.36	0.07596	0.7077995	4	0.98	0.01384	1	2	1.19	0.33641	0.874768965517241	0	0.61	1	1
GO:0045956	positive regulation of calcium ion-depen...	4	1.67	0.07342	0.7077995	0	0.61	1	1	4	0.7	0.00356	0.129615340909091	0	0.38	1	1
GO:0048016	inositol phosphate-mediated signaling	5	2.36	0.07596	0.7077995	2	1.04	0.27809	1	1	0.91	0.61111	1	2	0.53	0.09662	1
GO:0048878	chemical homeostasis	104	90.83	0.07213	0.7077995	35	33.48	0.41699	1	48	40.2	0.11135	0.612946351931331	23	19.49	0.23187	1
GO:0051153	regulation of striated muscle cell diffe...	15	10.15	0.07531	0.7077995	3	3.84	0.74792	1	9	4.69	0.04298	0.424027777777778	3	2.39	0.42955	1
GO:0051174	regulation of phosphorus metabolic proce...	200	182.22	0.07299	0.7077995	80	67.82	0.06258	1	95	82.85	0.081	0.537317342799189	34	39.88	0.86465	1
GO:0051260	protein homooligomerization	36	28.24	0.072	0.7077995	11	10.67	0.50384	1	18	13.17	0.1088	0.606021148825065	7	6.44	0.46677	1
GO:0051641	cellular localization	287	266.38	0.07428	0.7077995	109	100.08	0.17076	1	134	120.11	0.08393	0.542277755308392	56	57.74	0.624	1
GO:0060048	cardiac muscle contraction	17	11.82	0.07542	0.7077995	8	4.57	0.08547	1	9	5.46	0.09396	0.57675734870317	1	2.81	0.94341	1
GO:0060788	ectodermal placode formation	4	1.67	0.07342	0.7077995	2	0.67	0.14189	1	2	0.84	0.20341	0.761446924428822	0	0.45	1	1
GO:0060972	left/right pattern formation	4	1.67	0.07342	0.7077995	3	0.61	0.01962	1	1	0.63	0.47989	0.943680638297872	0	0.34	1	1
GO:0070168	negative regulation of biomineral tissue...	4	1.67	0.07342	0.7077995	0	0.61	1	1	3	0.77	0.03694	0.405426962457338	2	0.38	0.05273	1
GO:0070304	positive regulation of stress-activated ...	13	8.49	0.07378	0.7077995	6	2.68	0.04927	1	6	3.85	0.18524	0.744591342534504	1	1.59	0.80349	1
GO:0070374	positive regulation of ERK1 and ERK2 cas...	18	12.66	0.07512	0.7077995	2	4.64	0.95088	1	10	5.46	0.04482	0.435258054711246	6	2.69	0.0518	1
GO:0070588	calcium ion transmembrane transport	16	10.85	0.06868	0.7077995	4	3.84	0.54104	1	10	4.76	0.01926	0.305212776412776	2	2.2	0.65173	1
GO:0071241	cellular response to inorganic substance	17	11.68	0.06887	0.7077995	7	4.27	0.13332	1	8	4.97	0.12205	0.637799060297572	3	2.43	0.43966	1
GO:0071696	ectodermal placode development	4	1.67	0.07342	0.7077995	2	0.67	0.14189	1	2	0.84	0.20341	0.761446924428822	0	0.45	1	1
GO:0071697	ectodermal placode morphogenesis	4	1.67	0.07342	0.7077995	2	0.67	0.14189	1	2	0.84	0.20341	0.761446924428822	0	0.45	1	1
GO:0071902	positive regulation of protein serine/th...	37	29.07	0.07039	0.7077995	13	10.86	0.29047	1	20	13.38	0.04581	0.436804796511628	7	6.37	0.4544	1
GO:0072331	signal transduction by p53 class mediato...	25	18.5	0.06942	0.7077995	12	6.95	0.04476	1	8	8.82	0.66455	1	6	4.32	0.26398	1
GO:0090025	regulation of monocyte chemotaxis	4	1.67	0.07342	0.7077995	1	0.67	0.49971	1	2	0.7	0.15178	0.692272805139186	1	0.34	0.2939	1
GO:1901655	cellular response to ketone	6	3.06	0.07444	0.7077995	2	1.16	0.32421	1	4	1.4	0.04703	0.436804796511628	0	0.68	1	1
GO:1902107	positive regulation of leukocyte differe...	19	13.49	0.07463	0.7077995	5	4.88	0.54364	1	8	5.74	0.21458	0.786590742857143	6	2.65	0.04891	1
GO:0002444	myeloid leukocyte mediated immunity	10	6.12	0.07632	0.70918404432133	4	2.38	0.21232	1	7	2.8	0.01967	0.305818248175182	0	1.36	1	1
GO:0055024	regulation of cardiac muscle tissue deve...	10	6.12	0.07632	0.70918404432133	2	2.44	0.71028	1	7	3.01	0.0284	0.362142430278884	1	1.52	0.78762	1
GO:0009150	purine ribonucleotide metabolic process	112	98.62	0.07644	0.709316680497925	39	35.98	0.32114	1	51	45.17	0.1963	0.761446924428822	25	21.76	0.26196	1
GO:0003002	regionalization	50	41.04	0.07727	0.716028218232044	16	15.37	0.47126	1	32	19.47	0.00365	0.131771186440678	5	9.48	0.96371	1
GO:0032496	response to lipopolysaccharide	35	27.54	0.07798	0.720616831955923	11	10.12	0.43301	1	16	11.56	0.11538	0.622175696202532	7	5.65	0.33585	1
GO:1901564	organonitrogen compound metabolic proces...	243	224.09	0.07797	0.720616831955923	95	82.21	0.06829	1	98	100.43	0.62399	1	52	48.11	0.29118	1
GO:0009966	regulation of signal transduction	274	254.14	0.07823	0.72094103021978	86	93.92	0.83523	1	141	115.83	0.00554	0.170881900452489	56	55.09	0.469	1
GO:0046068	cGMP metabolic process	8	4.59	0.07818	0.72094103021978	1	1.65	0.81756	1	6	2.03	0.01368	0.263298795180723	2	0.99	0.2588	1
GO:0002705	positive regulation of leukocyte mediate...	11	6.96	0.07903	0.725324582763338	4	2.68	0.27978	1	8	2.87	0.00673	0.184569527896996	1	1.4	0.76139	1
GO:0030838	positive regulation of actin filament po...	11	6.96	0.07903	0.725324582763338	4	2.68	0.27978	1	5	3.29	0.23068	0.807253669222344	3	1.71	0.24259	1
GO:0050885	neuromuscular process controlling balanc...	11	6.96	0.07903	0.725324582763338	4	2.56	0.25231	1	7	3.29	0.04363	0.426945941807044	1	1.55	0.79571	1
GO:0006941	striated muscle contraction	21	15.3	0.07918	0.72570849726776	9	5.85	0.13041	1	10	7.07	0.16862	0.723270805369127	3	3.6	0.70449	1
GO:0001709	cell fate determination	9	5.42	0.0831	0.727703890160183	2	2.2	0.65405	1	6	2.59	0.04177	0.423710747663551	1	1.36	0.75195	1
GO:0001711	endodermal cell fate commitment	4	1.81	0.0948	0.727703890160183	1	0.79	0.55894	1	2	0.77	0.1773	0.729988043478261	1	0.45	0.37128	1
GO:0001818	negative regulation of cytokine producti...	23	17.25	0.08885	0.727703890160183	6	6.83	0.68626	1	9	7.14	0.28488	0.861801018600531	7	3.64	0.07165	1
GO:0001836	release of cytochrome c from mitochondri...	10	6.26	0.08647	0.727703890160183	3	2.32	0.41136	1	2	2.87	0.79232	1	5	1.36	0.01091	1
GO:0002438	acute inflammatory response to antigenic...	4	1.81	0.0948	0.727703890160183	1	0.55	0.43254	1	2	0.77	0.1773	0.729988043478261	0	0.34	1	1
GO:0002460	adaptive immune response based on somati...	28	21.42	0.08061	0.727703890160183	9	8.11	0.42352	1	16	8.47	0.01011	0.234529032258065	6	4.09	0.22603	1
GO:0002467	germinal center formation	4	1.81	0.0948	0.727703890160183	1	0.73	0.53026	1	2	0.84	0.20341	0.761446924428822	1	0.45	0.37128	1
GO:0002576	platelet degranulation	15	10.43	0.0909	0.727703890160183	0	3.66	1	1	8	4.48	0.07702	0.537317342799189	8	2.05	0.00089	1
GO:0002579	positive regulation of antigen processin...	3	1.11	0.08762	0.727703890160183	1	0.37	0.31454	1	1	0.49	0.39854	0.896399366420275	1	0.23	0.20702	1
GO:0002701	negative regulation of production of mol...	3	1.11	0.08762	0.727703890160183	0	0.49	1	1	2	0.49	0.08128	0.537317342799189	2	0.27	0.02652	1
GO:0002719	negative regulation of cytokine producti...	3	1.11	0.08762	0.727703890160183	0	0.49	1	1	2	0.49	0.08128	0.537317342799189	2	0.27	0.02652	1
GO:0002724	regulation of T cell cytokine production	3	1.11	0.08762	0.727703890160183	1	0.43	0.35637	1	2	0.49	0.08128	0.537317342799189	0	0.23	1	1
GO:0003129	heart induction	3	1.11	0.08762	0.727703890160183	1	0.49	0.39565	1	2	0.49	0.08128	0.537317342799189	0	0.3	1	1
GO:0005996	monosaccharide metabolic process	42	34.22	0.09012	0.727703890160183	11	12.38	0.70114	1	20	15.55	0.14699	0.692272805139186	12	7.43	0.06917	1
GO:0006024	glycosaminoglycan biosynthetic process	18	12.94	0.08886	0.727703890160183	7	4.88	0.21453	1	9	6.02	0.14665	0.692272805139186	3	2.92	0.56344	1
GO:0006026	aminoglycan catabolic process	12	7.79	0.08087	0.727703890160183	7	2.81	0.02037	1	4	3.22	0.40407	0.906774631578947	2	1.44	0.42531	1
GO:0006090	pyruvate metabolic process	7	3.89	0.08395	0.727703890160183	2	1.52	0.45609	1	3	1.82	0.27297	0.861801018600531	2	0.99	0.2588	1
GO:0006094	gluconeogenesis	13	8.76	0.09082	0.727703890160183	3	3.35	0.66048	1	4	3.78	0.52902	0.978816733987305	6	2.01	0.01454	1
GO:0006163	purine nucleotide metabolic process	118	104.74	0.08405	0.727703890160183	43	38.36	0.23478	1	53	47.69	0.22496	0.807253669222344	25	23.01	0.36189	1
GO:0006813	potassium ion transport	24	17.94	0.08136	0.727703890160183	6	7.01	0.71059	1	15	8.12	0.01517	0.27556875	8	4.13	0.05468	1
GO:0006942	regulation of striated muscle contractio...	15	10.29	0.08287	0.727703890160183	6	4.03	0.21333	1	9	4.9	0.05443	0.484588279301746	1	2.58	0.9285	1
GO:0007015	actin filament organization	38	30.32	0.08112	0.727703890160183	8	11.83	0.91201	1	22	14.57	0.03413	0.397250819672131	10	7.39	0.2059	1
GO:0007501	mesodermal cell fate specification	4	1.81	0.0948	0.727703890160183	0	0.67	1	1	3	0.91	0.05771	0.484588279301746	1	0.42	0.34648	1
GO:0008584	male gonad development	19	13.63	0.08105	0.727703890160183	7	5.06	0.24183	1	9	5.88	0.13229	0.651258166409861	3	2.84	0.54547	1
GO:0009162	deoxyribonucleoside monophosphate metabo...	3	1.11	0.08762	0.727703890160183	1	0.37	0.31454	1	1	0.56	0.44069	0.922374418604651	1	0.23	0.20702	1
GO:0009950	dorsal/ventral axis specification	5	2.5	0.09363	0.727703890160183	1	1.04	0.65722	1	3	1.19	0.11175	0.612946351931331	0	0.64	1	1
GO:0010002	cardioblast differentiation	6	3.2	0.08937	0.727703890160183	1	1.22	0.71629	1	4	1.61	0.07295	0.524353768278965	1	0.8	0.55627	1
GO:0010165	response to X-ray	5	2.5	0.09363	0.727703890160183	2	0.91	0.23178	1	3	1.19	0.11175	0.612946351931331	0	0.61	1	1
GO:0010675	regulation of cellular carbohydrate meta...	19	13.77	0.08783	0.727703890160183	6	5.37	0.45038	1	10	6.37	0.1032	0.586780035492458	5	3.26	0.22691	1
GO:0010762	regulation of fibroblast migration	4	1.81	0.0948	0.727703890160183	0	0.73	1	1	4	0.84	0.0075	0.201365546218487	1	0.45	0.37128	1
GO:0010941	regulation of cell death	164	149.12	0.09269	0.727703890160183	56	56.11	0.5283	1	76	68.84	0.18985	0.756322630922693	35	33.21	0.39675	1
GO:0015695	organic cation transport	4	1.81	0.0948	0.727703890160183	0	0.67	1	1	2	0.77	0.1773	0.729988043478261	2	0.34	0.04325	1
GO:0021520	spinal cord motor neuron cell fate speci...	4	1.81	0.0948	0.727703890160183	2	0.67	0.14189	1	1	0.91	0.61111	1	1	0.45	0.37128	1
GO:0021537	telencephalon development	28	21.42	0.08061	0.727703890160183	8	8.29	0.59399	1	20	10.22	0.00288	0.120282352941176	1	4.97	0.99391	1
GO:0021544	subpallium development	5	2.5	0.09363	0.727703890160183	1	1.04	0.65722	1	4	1.26	0.03317	0.389625551470588	0	0.68	1	1
GO:0030048	actin filament-based movement	18	12.8	0.0818	0.727703890160183	5	4.57	0.48569	1	9	5.81	0.1254	0.637799060297572	5	2.69	0.13128	1
GO:0030224	monocyte differentiation	6	3.2	0.08937	0.727703890160183	0	1.16	1	1	5	1.33	0.00846	0.213673517786561	1	0.68	0.5016	1
GO:0030326	embryonic limb morphogenesis	21	15.58	0.09201	0.727703890160183	6	5.79	0.52543	1	14	7.56	0.01822	0.297004591836735	2	3.75	0.8945	1
GO:0030497	fatty acid elongation	3	1.11	0.08762	0.727703890160183	1	0.37	0.31454	1	2	0.56	0.10349	0.586780035492458	0	0.23	1	1
GO:0030521	androgen receptor signaling pathway	12	7.93	0.09008	0.727703890160183	4	3.11	0.37824	1	4	3.71	0.51404	0.963069614711033	4	1.9	0.12031	1
GO:0030810	positive regulation of nucleotide biosyn...	14	9.46	0.08265	0.727703890160183	7	3.42	0.05259	1	5	4.2	0.412	0.915545738045738	1	2.09	0.88142	1
GO:0031109	microtubule polymerization or depolymeri...	10	6.26	0.08647	0.727703890160183	3	2.32	0.41136	1	7	2.94	0.02524	0.341702542372881	1	1.44	0.77047	1
GO:0031279	regulation of cyclase activity	13	8.62	0.08202	0.727703890160183	7	3.29	0.04452	1	7	3.92	0.0945	0.577051145038168	1	2.09	0.88142	1
GO:0031282	regulation of guanylate cyclase activity	3	1.11	0.08762	0.727703890160183	0	0.37	1	1	3	0.42	0.00583	0.170881900452489	0	0.19	1	1
GO:0031329	regulation of cellular catabolic process	84	73.03	0.09008	0.727703890160183	26	27.14	0.62095	1	46	33.76	0.01907	0.305212776412776	17	16.45	0.48083	1
GO:0031532	actin cytoskeleton reorganization	12	7.79	0.08087	0.727703890160183	1	2.62	0.93358	1	8	3.71	0.02995	0.37233560311284	5	1.63	0.02247	1
GO:0031943	regulation of glucocorticoid metabolic p...	3	1.11	0.08762	0.727703890160183	2	0.49	0.0814	1	1	0.56	0.44069	0.922374418604651	0	0.3	1	1
GO:0032095	regulation of response to food	4	1.81	0.0948	0.727703890160183	2	0.73	0.16371	1	1	0.84	0.58178	1	1	0.45	0.37128	1
GO:0032096	negative regulation of response to food	3	1.11	0.08762	0.727703890160183	2	0.43	0.06356	1	0	0.56	1	1	1	0.3	0.26605	1
GO:0032099	negative regulation of appetite	3	1.11	0.08762	0.727703890160183	2	0.43	0.06356	1	0	0.56	1	1	1	0.3	0.26605	1
GO:0032106	positive regulation of response to extra...	4	1.81	0.0948	0.727703890160183	1	0.79	0.55894	1	1	0.84	0.58178	1	2	0.45	0.07361	1
GO:0032109	positive regulation of response to nutri...	4	1.81	0.0948	0.727703890160183	1	0.79	0.55894	1	1	0.84	0.58178	1	2	0.45	0.07361	1
GO:0032271	regulation of protein polymerization	20	14.74	0.09352	0.727703890160183	9	5.79	0.12447	1	10	6.86	0.14722	0.692272805139186	4	3.56	0.47997	1
GO:0032273	positive regulation of protein polymeriz...	13	8.62	0.08202	0.727703890160183	6	3.29	0.10924	1	6	4.06	0.21859	0.792838706015891	3	2.05	0.33633	1
GO:0032355	response to estradiol	16	11.27	0.09044	0.727703890160183	3	4.33	0.81638	1	11	5.32	0.01621	0.282239509536785	4	2.73	0.29097	1
GO:0032462	regulation of protein homooligomerizatio...	4	1.81	0.0948	0.727703890160183	1	0.73	0.53026	1	2	0.91	0.22991	0.807253669222344	1	0.49	0.39515	1
GO:0032615	interleukin-12 production	9	5.56	0.09463	0.727703890160183	3	2.26	0.39463	1	3	2.17	0.37114	0.896399366420275	2	1.1	0.30147	1
GO:0032655	regulation of interleukin-12 production	9	5.42	0.0831	0.727703890160183	3	2.2	0.37777	1	3	2.1	0.35154	0.874768965517241	2	1.06	0.28727	1
GO:0032727	positive regulation of interferon-alpha ...	3	1.11	0.08762	0.727703890160183	1	0.49	0.39565	1	2	0.42	0.06082	0.484588279301746	0	0.23	1	1
GO:0032885	regulation of polysaccharide biosyntheti...	7	3.89	0.08395	0.727703890160183	3	1.46	0.17757	1	3	1.75	0.25356	0.846065015479876	1	0.87	0.58936	1
GO:0033500	carbohydrate homeostasis	24	18.08	0.08722	0.727703890160183	7	6.77	0.51981	1	13	8.61	0.08892	0.562016617210683	4	4.32	0.63283	1
GO:0033599	regulation of mammary gland epithelial c...	4	1.81	0.0948	0.727703890160183	3	0.67	0.02577	1	1	0.91	0.61111	1	0	0.42	1	1
GO:0034605	cellular response to heat	6	3.2	0.08937	0.727703890160183	1	1.16	0.69783	1	2	1.61	0.48587	0.943680638297872	3	0.76	0.03817	1
GO:0034762	regulation of transmembrane transport	26	19.89	0.0896	0.727703890160183	12	7.5	0.07167	1	13	8.96	0.11229	0.613800769888794	3	4.47	0.83068	1
GO:0035113	embryonic appendage morphogenesis	21	15.58	0.09201	0.727703890160183	6	5.79	0.52543	1	14	7.56	0.01822	0.297004591836735	2	3.75	0.8945	1
GO:0035414	negative regulation of catenin import in...	3	1.11	0.08762	0.727703890160183	0	0.3	1	1	3	0.56	0.01468	0.271113294797688	0	0.23	1	1
GO:0035637	multicellular organismal signaling	30	23.51	0.09276	0.727703890160183	9	9.15	0.56953	1	17	10.79	0.04107	0.423710747663551	5	5.57	0.66035	1
GO:0035850	epithelial cell differentiation involved...	7	3.89	0.08395	0.727703890160183	3	1.34	0.14737	1	5	1.82	0.03195	0.388877142857143	0	0.83	1	1
GO:0036149	phosphatidylinositol acyl-chain remodeli...	4	1.81	0.0948	0.727703890160183	2	0.73	0.16371	1	2	0.63	0.12709	0.637799060297572	0	0.3	1	1
GO:0036296	response to increased oxygen levels	4	1.81	0.0948	0.727703890160183	3	0.79	0.0408	1	1	0.77	0.55025	0.987402461538462	0	0.45	1	1
GO:0038061	NIK/NF-kappaB signaling	6	3.2	0.08937	0.727703890160183	4	1.22	0.03038	1	2	1.33	0.38825	0.896399366420275	0	0.64	1	1
GO:0039531	regulation of viral-induced cytoplasmic ...	3	1.11	0.08762	0.727703890160183	1	0.49	0.39565	1	1	0.56	0.44069	0.922374418604651	1	0.3	0.26605	1
GO:0039535	regulation of RIG-I signaling pathway	3	1.11	0.08762	0.727703890160183	1	0.49	0.39565	1	1	0.56	0.44069	0.922374418604651	1	0.3	0.26605	1
GO:0042428	serotonin metabolic process	3	1.11	0.08762	0.727703890160183	0	0.49	1	1	1	0.49	0.39854	0.896399366420275	2	0.27	0.02652	1
GO:0042430	indole-containing compound metabolic pro...	5	2.5	0.09363	0.727703890160183	0	0.73	1	1	3	1.05	0.08281	0.537317342799189	2	0.45	0.07361	1
GO:0042593	glucose homeostasis	24	18.08	0.08722	0.727703890160183	7	6.77	0.51981	1	13	8.61	0.08892	0.562016617210683	4	4.32	0.63283	1
GO:0043149	stress fiber assembly	11	7.09	0.0887	0.727703890160183	1	2.62	0.93358	1	8	3.57	0.0243	0.339032751091703	3	1.71	0.24259	1
GO:0043266	regulation of potassium ion transport	9	5.56	0.09463	0.727703890160183	1	2.07	0.88272	1	5	2.66	0.12375	0.637799060297572	5	1.36	0.01091	1
GO:0043302	positive regulation of leukocyte degranu...	3	1.11	0.08762	0.727703890160183	2	0.43	0.06356	1	2	0.49	0.08128	0.537317342799189	0	0.27	1	1
GO:0043368	positive T cell selection	6	3.2	0.08937	0.727703890160183	1	1.28	0.73363	1	3	1.33	0.14391	0.687151680358477	2	0.68	0.14739	1
GO:0044764	multi-organism cellular process	89	77.62	0.08805	0.727703890160183	43	29.46	0.00765	1	33	35.37	0.68977	1	15	16.91	0.72238	1
GO:0045055	regulated secretory pathway	10	6.26	0.08647	0.727703890160183	4	2.38	0.21232	1	7	2.87	0.02234	0.322240632054176	0	1.36	1	1
GO:0045597	positive regulation of cell differentiat...	83	71.64	0.08057	0.727703890160183	24	27.02	0.75841	1	42	32.92	0.05982	0.484588279301746	16	15.88	0.52557	1
GO:0045639	positive regulation of myeloid cell diff...	13	8.76	0.09082	0.727703890160183	6	3.23	0.10205	1	4	3.92	0.55827	0.994009888579387	3	1.86	0.28395	1
GO:0045670	regulation of osteoclast differentiation	10	6.26	0.08647	0.727703890160183	5	2.5	0.10207	1	3	2.38	0.42908	0.922374418604651	2	1.21	0.3437	1
GO:0045778	positive regulation of ossification	9	5.56	0.09463	0.727703890160183	2	2.32	0.68318	1	5	2.66	0.12375	0.637799060297572	2	1.4	0.41205	1
GO:0045779	negative regulation of bone resorption	3	1.11	0.08762	0.727703890160183	3	0.49	0.01003	1	0	0.56	1	1	0	0.3	1	1
GO:0045930	negative regulation of mitotic cell cycl...	6	3.2	0.08937	0.727703890160183	2	1.16	0.32421	1	3	1.54	0.19684	0.761446924428822	2	0.76	0.17443	1
GO:0046058	cAMP metabolic process	21	15.58	0.09201	0.727703890160183	11	5.85	0.03146	1	5	7	0.83844	1	6	3.56	0.14606	1
GO:0046459	short-chain fatty acid metabolic process	3	1.11	0.08762	0.727703890160183	1	0.49	0.39565	1	2	0.56	0.10349	0.586780035492458	1	0.3	0.26605	1
GO:0046653	tetrahydrofolate metabolic process	4	1.81	0.0948	0.727703890160183	3	0.73	0.03284	1	1	0.77	0.55025	0.987402461538462	1	0.38	0.3207	1
GO:0048568	embryonic organ development	59	49.8	0.09066	0.727703890160183	23	18.97	0.19482	1	28	24.09	0.22784	0.807253669222344	11	11.71	0.62908	1
GO:0050771	negative regulation of axonogenesis	9	5.42	0.0831	0.727703890160183	1	1.95	0.86694	1	8	2.66	0.00415	0.141395744680851	0	1.25	1	1
GO:0050961	detection of temperature stimulus involv...	3	1.11	0.08762	0.727703890160183	2	0.43	0.06356	1	0	0.56	1	1	1	0.3	0.26605	1
GO:0050965	detection of temperature stimulus involv...	3	1.11	0.08762	0.727703890160183	2	0.43	0.06356	1	0	0.56	1	1	1	0.3	0.26605	1
GO:0051094	positive regulation of developmental pro...	110	97.09	0.08253	0.727703890160183	32	36.53	0.81104	1	60	44.47	0.00995	0.234529032258065	18	21.53	0.81895	1
GO:0051098	regulation of binding	31	24.2	0.08546	0.727703890160183	6	9.09	0.89863	1	17	11.07	0.05034	0.457556676136364	8	5.23	0.15316	1
GO:0051130	positive regulation of cellular componen...	87	75.67	0.08655	0.727703890160183	24	28.24	0.82639	1	51	35.23	0.00453	0.151553403141361	14	16.79	0.79692	1
GO:0051188	cofactor biosynthetic process	21	15.44	0.08544	0.727703890160183	10	5.79	0.06335	1	8	7	0.40168	0.902508860759494	3	3.53	0.69071	1
GO:0051205	protein insertion into membrane	8	4.73	0.09036	0.727703890160183	3	1.71	0.2421	1	4	2.17	0.16865	0.723270805369127	1	1.02	0.64833	1
GO:0051209	release of sequestered calcium ion into ...	13	8.76	0.09082	0.727703890160183	2	3.23	0.84256	1	9	3.57	0.00821	0.212396356275304	3	1.86	0.28395	1
GO:0051282	regulation of sequestering of calcium io...	13	8.76	0.09082	0.727703890160183	2	3.23	0.84256	1	9	3.57	0.00821	0.212396356275304	3	1.86	0.28395	1
GO:0051283	negative regulation of sequestering of c...	13	8.76	0.09082	0.727703890160183	2	3.23	0.84256	1	9	3.57	0.00821	0.212396356275304	3	1.86	0.28395	1
GO:0051350	negative regulation of lyase activity	6	3.2	0.08937	0.727703890160183	4	1.28	0.03577	1	2	1.47	0.43821	0.922374418604651	1	0.8	0.55627	1
GO:0051705	multi-organism behavior	13	8.76	0.09082	0.727703890160183	3	2.99	0.58176	1	9	4.06	0.01862	0.299702267002519	1	1.78	0.83817	1
GO:0051930	regulation of sensory perception of pain	5	2.5	0.09363	0.727703890160183	0	0.91	1	1	2	1.05	0.28334	0.861801018600531	3	0.53	0.0144	1
GO:0051931	regulation of sensory perception	5	2.5	0.09363	0.727703890160183	0	0.91	1	1	2	1.05	0.28334	0.861801018600531	3	0.53	0.0144	1
GO:0051960	regulation of nervous system development	75	64.54	0.08836	0.727703890160183	23	23.91	0.60884	1	43	30.25	0.01187	0.246118064516129	8	14.29	0.97732	1
GO:0052564	response to immune response of other org...	3	1.11	0.08762	0.727703890160183	1	0.43	0.35637	1	1	0.56	0.44069	0.922374418604651	1	0.3	0.26605	1
GO:0052572	response to host immune response	3	1.11	0.08762	0.727703890160183	1	0.43	0.35637	1	1	0.56	0.44069	0.922374418604651	1	0.3	0.26605	1
GO:0055001	muscle cell development	22	16.27	0.08413	0.727703890160183	3	6.1	0.94833	1	15	7.56	0.00808	0.212396356275304	5	3.64	0.29934	1
GO:0055070	copper ion homeostasis	3	1.11	0.08762	0.727703890160183	1	0.43	0.35637	1	2	0.42	0.06082	0.484588279301746	0	0.19	1	1
GO:0055093	response to hyperoxia	4	1.81	0.0948	0.727703890160183	3	0.79	0.0408	1	1	0.77	0.55025	0.987402461538462	0	0.45	1	1
GO:0060544	regulation of necroptotic process	3	1.11	0.08762	0.727703890160183	2	0.49	0.0814	1	0	0.49	1	1	1	0.27	0.2371	1
GO:0060766	negative regulation of androgen receptor...	4	1.81	0.0948	0.727703890160183	2	0.73	0.16371	1	1	0.84	0.58178	1	1	0.49	0.39515	1
GO:0060911	cardiac cell fate commitment	4	1.81	0.0948	0.727703890160183	0	0.79	1	1	3	0.77	0.03694	0.405426962457338	1	0.45	0.37128	1
GO:0061061	muscle structure development	72	61.62	0.08543	0.727703890160183	20	23.18	0.78615	1	39	28.71	0.03062	0.378456092843327	16	13.99	0.32539	1
GO:0061178	regulation of insulin secretion involved...	7	3.89	0.08395	0.727703890160183	2	1.46	0.43506	1	4	1.89	0.11645	0.623238712374582	1	0.87	0.58936	1
GO:0061311	cell surface receptor signaling pathway ...	6	3.2	0.08937	0.727703890160183	2	1.28	0.36953	1	2	1.47	0.43821	0.922374418604651	2	0.76	0.17443	1
GO:0061448	connective tissue development	34	26.99	0.08932	0.727703890160183	11	9.58	0.36176	1	18	12.54	0.07646	0.537317342799189	6	6.14	0.58186	1
GO:0070193	synaptonemal complex organization	4	1.81	0.0948	0.727703890160183	1	0.61	0.46718	1	3	0.77	0.03694	0.405426962457338	0	0.34	1	1
GO:0070670	response to interleukin-4	6	3.2	0.08937	0.727703890160183	2	1.1	0.30121	1	4	1.4	0.04703	0.436804796511628	1	0.61	0.46147	1
GO:0070997	neuron death	34	26.71	0.0798	0.727703890160183	8	9.64	0.7556	1	25	12.61	0.00075	0.0550862068965517	3	6.07	0.94569	1
GO:0071230	cellular response to amino acid stimulus	9	5.42	0.0831	0.727703890160183	4	1.95	0.128	1	3	2.59	0.485	0.943680638297872	3	1.18	0.11141	1
GO:0071322	cellular response to carbohydrate stimul...	14	9.46	0.08265	0.727703890160183	4	3.54	0.47534	1	8	4.55	0.08273	0.537317342799189	2	2.2	0.65173	1
GO:0071625	vocalization behavior	3	1.11	0.08762	0.727703890160183	0	0.37	1	1	3	0.56	0.01468	0.271113294797688	0	0.23	1	1
GO:0071822	protein complex subunit organization	170	153.99	0.07976	0.727703890160183	64	58.92	0.25519	1	80	70.8	0.13033	0.644588777089783	29	34.69	0.8724	1
GO:0071868	cellular response to monoamine stimulus	4	1.81	0.0948	0.727703890160183	1	0.61	0.46718	1	3	0.84	0.04675	0.436804796511628	0	0.49	1	1
GO:0071870	cellular response to catecholamine stimu...	4	1.81	0.0948	0.727703890160183	1	0.61	0.46718	1	3	0.84	0.04675	0.436804796511628	0	0.49	1	1
GO:0072015	glomerular visceral epithelial cell deve...	3	1.11	0.08762	0.727703890160183	2	0.43	0.06356	1	2	0.49	0.08128	0.537317342799189	0	0.23	1	1
GO:0072224	metanephric glomerulus development	4	1.81	0.0948	0.727703890160183	1	0.79	0.55894	1	3	0.84	0.04675	0.436804796511628	0	0.45	1	1
GO:0072521	purine-containing compound metabolic pro...	123	109.33	0.08161	0.727703890160183	45	40.13	0.22772	1	55	49.79	0.23394	0.813414720260728	26	24.04	0.36643	1
GO:0072643	interferon-gamma secretion	3	1.11	0.08762	0.727703890160183	1	0.43	0.35637	1	1	0.35	0.30449	0.861801018600531	NA	NA	NA	NA
GO:0072657	protein localization to membrane	44	36.17	0.09425	0.727703890160183	18	14.15	0.1744	1	22	16.88	0.12097	0.637799060297572	6	8.34	0.84642	1
GO:0086009	membrane repolarization	6	3.2	0.08937	0.727703890160183	1	1.16	0.69783	1	5	1.47	0.01319	0.261751863354037	1	0.68	0.5016	1
GO:0086010	membrane depolarization during action po...	4	1.81	0.0948	0.727703890160183	1	0.67	0.49971	1	3	0.91	0.05771	0.484588279301746	1	0.42	0.34648	1
GO:1900373	positive regulation of purine nucleotide...	14	9.46	0.08265	0.727703890160183	7	3.42	0.05259	1	5	4.2	0.412	0.915545738045738	1	2.09	0.88142	1
GO:1901213	regulation of transcription from RNA pol...	4	1.81	0.0948	0.727703890160183	2	0.67	0.14189	1	1	0.84	0.58178	1	1	0.42	0.34648	1
GO:1901216	positive regulation of neuron death	9	5.42	0.0831	0.727703890160183	2	2.07	0.62282	1	6	2.45	0.0328	0.389625551470588	1	1.25	0.72133	1
GO:1901798	positive regulation of signal transducti...	4	1.81	0.0948	0.727703890160183	1	0.61	0.46718	1	1	0.7	0.51635	0.963069614711033	2	0.38	0.05273	1
GO:1902187	negative regulation of viral release fro...	3	1.11	0.08762	0.727703890160183	2	0.43	0.06356	1	2	0.49	0.08128	0.537317342799189	0	0.23	1	1
GO:2000679	positive regulation of transcription reg...	3	1.11	0.08762	0.727703890160183	1	0.3	0.27	1	2	0.56	0.10349	0.586780035492458	0	0.19	1	1
GO:0043393	regulation of protein binding	19	13.91	0.09496	0.728099017142857	5	5.25	0.60882	1	11	6.44	0.05597	0.484588279301746	3	3.07	0.59806	1
GO:0048771	tissue remodeling	23	17.39	0.09521	0.72918252283105	9	6.59	0.21235	1	10	7.56	0.22378	0.807093401015228	4	3.72	0.51271	1
GO:0051258	protein polymerization	26	20.03	0.09554	0.730875553021665	11	7.87	0.16329	1	12	9.38	0.22834	0.807253669222344	6	4.78	0.34384	1
GO:0001558	regulation of cell growth	45	37.14	0.09622	0.734178068181818	11	13.78	0.82089	1	25	17.16	0.03669	0.405426962457338	10	8.26	0.31363	1
GO:0006023	aminoglycan biosynthetic process	18	13.08	0.0963	0.734178068181818	7	4.94	0.2235	1	9	6.09	0.15411	0.696069620253165	3	2.96	0.57226	1
GO:0030330	DNA damage response, signal transduction...	18	13.08	0.0963	0.734178068181818	8	4.88	0.1135	1	5	6.16	0.74724	1	6	3	0.07862	1
GO:0042493	response to drug	55	46.32	0.09644	0.734410851305335	12	17.2	0.93127	1	32	20.66	0.00876	0.220379527559055	13	10.01	0.20267	1
GO:0008285	negative regulation of cell proliferatio...	77	66.77	0.09669	0.73479885617214	29	25.19	0.23881	1	34	30.39	0.26993	0.861801018600531	17	14.79	0.31048	1
GO:0072522	purine-containing compound biosynthetic ...	33	26.29	0.09671	0.73479885617214	14	9.82	0.11399	1	14	11.91	0.30321	0.861801018600531	8	5.95	0.24532	1
GO:0001508	action potential	28	21.84	0.09717	0.737087443946188	7	8.72	0.77711	1	16	10.01	0.04192	0.423710747663551	5	5.16	0.5917	1
GO:0010453	regulation of cell fate commitment	7	4.03	0.098	0.737087443946188	3	1.65	0.22557	1	3	1.68	0.23435	0.813414720260728	1	0.87	0.58936	1
GO:0016266	O-glycan processing	10	6.4	0.09739	0.737087443946188	5	2.26	0.07213	1	2	2.52	0.72868	1	3	1.21	0.11967	1
GO:0021795	cerebral cortex cell migration	7	4.03	0.098	0.737087443946188	1	1.52	0.79303	1	6	1.96	0.01151	0.244633663366337	0	0.91	1	1
GO:0030501	positive regulation of bone mineralizati...	7	4.03	0.098	0.737087443946188	1	1.65	0.81756	1	4	1.89	0.11645	0.623238712374582	2	0.99	0.2588	1
GO:0032835	glomerulus development	10	6.4	0.09739	0.737087443946188	3	2.38	0.42795	1	7	2.94	0.02524	0.341702542372881	1	1.55	0.79571	1
GO:0044003	modification by symbiont of host morphol...	7	4.03	0.098	0.737087443946188	4	1.46	0.05506	1	3	2.03	0.33188	0.874768965517241	1	0.91	0.60496	1
GO:0051057	positive regulation of small GTPase medi...	7	4.03	0.098	0.737087443946188	1	1.46	0.77955	1	5	1.75	0.02733	0.358179754601227	1	0.83	0.57313	1
GO:0051496	positive regulation of stress fiber asse...	7	4.03	0.098	0.737087443946188	1	1.46	0.77955	1	4	2.03	0.14159	0.682837811320755	2	0.95	0.24457	1
GO:0007200	phospholipase C-activating G-protein cou...	12	8.07	0.09992	0.742586220994475	5	3.17	0.20915	1	5	3.99	0.36939	0.896399366420275	3	2.01	0.32584	1
GO:0017148	negative regulation of translation	12	8.07	0.09992	0.742586220994475	5	3.29	0.23164	1	8	3.92	0.04001	0.423710747663551	1	1.97	0.86675	1
GO:0030801	positive regulation of cyclic nucleotide...	14	9.74	0.09996	0.742586220994475	6	3.54	0.14048	1	4	4.34	0.63973	1	3	2.16	0.36772	1
GO:0042590	antigen processing and presentation of e...	13	8.9	0.10017	0.742586220994475	6	3.29	0.10924	1	6	4.41	0.27802	0.861801018600531	3	2.05	0.33633	1
GO:0044710	single-organism metabolic process	558	534.85	0.09984	0.742586220994475	211	195.29	0.08695	1	232	236.5	0.65819	1	122	112.1	0.13518	1
GO:0050728	negative regulation of inflammatory resp...	14	9.74	0.09996	0.742586220994475	6	3.72	0.16631	1	6	4.2	0.24186	0.834045008094981	3	2.16	0.36772	1
GO:0050792	regulation of viral process	21	15.72	0.09891	0.742586220994475	12	5.85	0.01352	1	8	7	0.40168	0.902508860759494	1	3.18	0.96168	1
GO:0050807	regulation of synapse organization	11	7.23	0.09906	0.742586220994475	2	2.68	0.75865	1	6	3.5	0.13476	0.657842933537051	2	1.63	0.48912	1
GO:0051208	sequestering of calcium ion	13	8.9	0.10017	0.742586220994475	2	3.29	0.85004	1	9	3.64	0.00933	0.229707434944238	3	1.9	0.29439	1
GO:0051897	positive regulation of protein kinase B ...	13	8.9	0.10017	0.742586220994475	1	3.23	0.96471	1	6	3.99	0.20725	0.772202623906705	5	1.93	0.04302	1
GO:0061053	somite development	14	9.74	0.09996	0.742586220994475	3	3.54	0.69561	1	10	4.55	0.0143	0.271113294797688	1	2.12	0.88595	1
GO:0071333	cellular response to glucose stimulus	12	8.07	0.09992	0.742586220994475	3	2.99	0.58176	1	7	3.85	0.08769	0.555891964285714	2	1.86	0.55957	1
GO:0090090	negative regulation of canonical Wnt sig...	15	10.57	0.0994	0.742586220994475	4	3.84	0.54104	1	10	5.18	0.03277	0.389625551470588	2	2.43	0.70422	1
GO:0019228	neuronal action potential	20	14.88	0.10071	0.745017067254686	6	6.1	0.57641	1	9	6.79	0.23792	0.823123335138062	5	3.6	0.2919	1
GO:0051493	regulation of cytoskeleton organization	45	37.28	0.10072	0.745017067254686	11	13.84	0.82515	1	30	17.79	0.00329	0.126645180722892	8	8.57	0.62957	1
GO:0006006	glucose metabolic process	35	28.24	0.10235	0.756240253303965	10	10.43	0.60131	1	14	12.68	0.38962	0.896399366420275	12	6.26	0.02288	1
GO:0001659	temperature homeostasis	7	4.17	0.11326	0.759543222116301	2	1.59	0.47665	1	2	2.1	0.6313	1	3	1.06	0.08807	1
GO:0001782	B cell homeostasis	5	2.64	0.1132	0.759543222116301	1	0.98	0.63492	1	3	1.33	0.14391	0.687151680358477	1	0.64	0.48192	1
GO:0002335	mature B cell differentiation	3	1.25	0.1183	0.759543222116301	0	0.43	1	1	1	0.63	0.47989	0.943680638297872	3	0.34	0.00383	1
GO:0002433	immune response-regulating cell surface ...	13	9.04	0.11009	0.759543222116301	2	3.6	0.88279	1	9	4.2	0.02284	0.326504697986577	2	2.12	0.63266	1
GO:0002456	T cell mediated immunity	12	8.21	0.11038	0.759543222116301	4	2.93	0.33585	1	10	3.15	9e-04	0.0611808510638298	0	1.4	1	1
GO:0002483	antigen processing and presentation of e...	3	1.25	0.1183	0.759543222116301	2	0.3	0.03283	1	3	0.63	0.02088	0.31100979020979	0	0.19	1	1
GO:0002577	regulation of antigen processing and pre...	3	1.25	0.1183	0.759543222116301	1	0.43	0.35637	1	1	0.56	0.44069	0.922374418604651	1	0.27	0.2371	1
GO:0002643	regulation of tolerance induction	3	1.25	0.1183	0.759543222116301	1	0.55	0.43254	1	2	0.63	0.12709	0.637799060297572	0	0.34	1	1
GO:0002673	regulation of acute inflammatory respons...	10	6.54	0.10909	0.759543222116301	4	2.44	0.22545	1	4	2.45	0.2274	0.807253669222344	1	1.25	0.72133	1
GO:0002674	negative regulation of acute inflammator...	3	1.25	0.1183	0.759543222116301	3	0.49	0.01003	1	0	0.42	1	1	0	0.27	1	1
GO:0002709	regulation of T cell mediated immunity	9	5.7	0.10704	0.759543222116301	4	2.01	0.13906	1	7	2.17	0.00479	0.158591191709845	0	0.99	1	1
GO:0002864	regulation of acute inflammatory respons...	3	1.25	0.1183	0.759543222116301	1	0.37	0.31454	1	1	0.49	0.39854	0.896399366420275	0	0.23	1	1
GO:0002921	negative regulation of humoral immune re...	3	1.25	0.1183	0.759543222116301	2	0.49	0.0814	1	1	0.63	0.47989	0.943680638297872	0	0.3	1	1
GO:0003013	circulatory system process	55	46.88	0.11319	0.759543222116301	20	18.05	0.34964	1	25	21.15	0.21777	0.791553071672355	9	10.73	0.75222	1
GO:0006098	pentose-phosphate shunt	4	1.95	0.11874	0.759543222116301	1	0.61	0.46718	1	3	0.84	0.04675	0.436804796511628	0	0.34	1	1
GO:0006474	N-terminal protein amino acid acetylatio...	3	1.25	0.1183	0.759543222116301	1	0.37	0.31454	1	1	0.63	0.47989	0.943680638297872	1	0.3	0.26605	1
GO:0006555	methionine metabolic process	3	1.25	0.1183	0.759543222116301	3	0.49	0.01003	1	0	0.56	1	1	0	0.27	1	1
GO:0006575	cellular modified amino acid metabolic p...	27	21.14	0.10563	0.759543222116301	12	7.01	0.04734	1	10	8.82	0.38831	0.896399366420275	4	3.98	0.56758	1
GO:0006611	protein export from nucleus	9	5.7	0.10704	0.759543222116301	4	2.13	0.16226	1	4	2.59	0.2585	0.849262210796915	1	1.29	0.73193	1
GO:0006767	water-soluble vitamin metabolic process	14	9.88	0.10939	0.759543222116301	2	3.78	0.89912	1	7	4.2	0.12456	0.637799060297572	5	2.12	0.06017	1
GO:0006857	oligopeptide transport	3	1.25	0.1183	0.759543222116301	3	0.43	0.00657	1	1	0.63	0.47989	0.943680638297872	0	0.3	1	1
GO:0006909	phagocytosis	26	20.45	0.11486	0.759543222116301	5	7.93	0.90488	1	17	9.24	0.01055	0.236542105263158	5	4.59	0.48722	1
GO:0006955	immune response	163	149.4	0.11358	0.759543222116301	54	55.38	0.60138	1	71	62.4	0.13367	0.655011724137931	37	29.57	0.08995	1
GO:0007141	male meiosis I	4	1.95	0.11874	0.759543222116301	3	0.79	0.0408	1	1	0.98	0.63838	1	0	0.49	1	1
GO:0007167	enzyme linked receptor protein signaling...	126	113.92	0.11376	0.759543222116301	30	42.75	0.98808	1	79	52.1	1e-04	0.0135957446808511	23	25.36	0.72052	1
GO:0007210	serotonin receptor signaling pathway	3	1.25	0.1183	0.759543222116301	0	0.49	1	1	0	0.56	1	1	2	0.27	0.02652	1
GO:0007417	central nervous system development	107	95.56	0.10817	0.759543222116301	35	36.47	0.62825	1	58	44.89	0.02493	0.341702542372881	16	21.95	0.93211	1
GO:0007528	neuromuscular junction development	8	5.01	0.11777	0.759543222116301	2	1.89	0.57198	1	5	2.24	0.06951	0.511713547646384	1	1.06	0.6617	1
GO:0007638	mechanosensory behavior	3	1.25	0.1183	0.759543222116301	0	0.49	1	1	3	0.63	0.02088	0.31100979020979	0	0.34	1	1
GO:0008015	blood circulation	55	46.6	0.10459	0.759543222116301	20	17.93	0.33836	1	25	21.01	0.20815	0.775104020979021	9	10.65	0.74481	1
GO:0009110	vitamin biosynthetic process	5	2.64	0.1132	0.759543222116301	2	1.1	0.30121	1	0	0.91	1	1	2	0.49	0.08488	1
GO:0009259	ribonucleotide metabolic process	112	100.29	0.10774	0.759543222116301	39	36.65	0.36518	1	51	45.94	0.23263	0.813414720260728	25	22.14	0.29109	1
GO:0009408	response to heat	12	8.21	0.11038	0.759543222116301	2	2.99	0.80916	1	6	3.78	0.17459	0.729988043478261	4	1.86	0.11388	1
GO:0009611	response to wounding	152	138.68	0.11104	0.759543222116301	42	52.08	0.9467	1	77	59.88	0.01189	0.246118064516129	35	29.38	0.15683	1
GO:0009996	negative regulation of cell fate specifi...	3	1.25	0.1183	0.759543222116301	0	0.55	1	1	2	0.63	0.12709	0.637799060297572	1	0.34	0.2939	1
GO:0010035	response to inorganic substance	52	43.82	0.10421	0.759543222116301	14	16.35	0.76413	1	28	19.4	0.03143	0.387717567567568	12	9.52	0.24425	1
GO:0010647	positive regulation of cell communicatio...	139	125.89	0.10474	0.759543222116301	42	47.33	0.81788	1	70	56.66	0.03548	0.405426962457338	31	27.26	0.24992	1
GO:0010761	fibroblast migration	5	2.64	0.1132	0.759543222116301	0	1.1	1	1	5	1.26	0.00661	0.182848051948052	1	0.68	0.5016	1
GO:0010996	response to auditory stimulus	3	1.25	0.1183	0.759543222116301	0	0.49	1	1	3	0.63	0.02088	0.31100979020979	0	0.34	1	1
GO:0016048	detection of temperature stimulus	3	1.25	0.1183	0.759543222116301	2	0.49	0.0814	1	0	0.63	1	1	1	0.34	0.2939	1
GO:0016358	dendrite development	21	16	0.11366	0.759543222116301	2	5.43	0.97538	1	14	7.63	0.01962	0.305818248175182	3	3.18	0.62282	1
GO:0018108	peptidyl-tyrosine phosphorylation	38	31.02	0.10485	0.759543222116301	10	12.32	0.79552	1	23	13.59	0.00894	0.22315078125	9	6.82	0.24377	1
GO:0018212	peptidyl-tyrosine modification	38	31.3	0.1155	0.759543222116301	10	12.44	0.80521	1	23	13.73	0.01007	0.234529032258065	9	6.9	0.25366	1
GO:0019076	viral release from host cell	4	1.95	0.11874	0.759543222116301	3	0.79	0.0408	1	2	0.84	0.20341	0.761446924428822	0	0.42	1	1
GO:0019226	transmission of nerve impulse	24	18.5	0.10642	0.759543222116301	8	7.38	0.45971	1	12	8.54	0.14602	0.692186795252226	5	4.44	0.45775	1
GO:0019318	hexose metabolic process	39	32.13	0.1125	0.759543222116301	11	11.53	0.60837	1	17	14.57	0.28856	0.861801018600531	12	6.94	0.04545	1
GO:0019321	pentose metabolic process	3	1.25	0.1183	0.759543222116301	0	0.43	1	1	3	0.63	0.02088	0.31100979020979	0	0.27	1	1
GO:0019693	ribose phosphate metabolic process	112	100.71	0.11676	0.759543222116301	39	36.84	0.37744	1	51	46.15	0.24308	0.834337701396348	25	22.25	0.30005	1
GO:0021819	layer formation in cerebral cortex	3	1.25	0.1183	0.759543222116301	0	0.43	1	1	3	0.63	0.02088	0.31100979020979	0	0.27	1	1
GO:0030049	muscle filament sliding	8	4.87	0.10356	0.759543222116301	3	1.59	0.20928	1	1	2.03	0.87858	1	3	0.83	0.04879	1
GO:0030865	cortical cytoskeleton organization	5	2.64	0.1132	0.759543222116301	0	1.04	1	1	3	1.26	0.12746	0.637799060297572	2	0.61	0.12134	1
GO:0031057	negative regulation of histone modificat...	5	2.64	0.1132	0.759543222116301	0	0.79	1	1	4	1.33	0.03976	0.423444	1	0.57	0.44021	1
GO:0032231	regulation of actin filament bundle asse...	10	6.54	0.10909	0.759543222116301	1	2.32	0.90891	1	7	3.22	0.03942	0.423444	2	1.48	0.43841	1
GO:0032321	positive regulation of Rho GTPase activi...	12	8.21	0.11038	0.759543222116301	5	2.68	0.12797	1	5	3.92	0.35516	0.876226592049402	2	1.67	0.50134	1
GO:0032331	negative regulation of chondrocyte diffe...	4	1.95	0.11874	0.759543222116301	1	0.79	0.55894	1	3	0.91	0.05771	0.484588279301746	0	0.49	1	1
GO:0032461	positive regulation of protein oligomeri...	4	1.95	0.11874	0.759543222116301	1	0.79	0.55894	1	1	0.98	0.63838	1	2	0.53	0.09662	1
GO:0032479	regulation of type I interferon producti...	16	11.68	0.11613	0.759543222116301	8	4.39	0.07083	1	4	5.18	0.77093	1	3	2.46	0.4497	1
GO:0032768	regulation of monooxygenase activity	9	5.7	0.10704	0.759543222116301	2	2.13	0.6387	1	6	2.45	0.0328	0.389625551470588	3	1.29	0.13682	1
GO:0032769	negative regulation of monooxygenase act...	3	1.25	0.1183	0.759543222116301	0	0.43	1	1	2	0.63	0.12709	0.637799060297572	1	0.3	0.26605	1
GO:0032846	positive regulation of homeostatic proce...	12	8.21	0.11038	0.759543222116301	2	3.05	0.81806	1	8	3.5	0.02178	0.319789795918367	1	1.67	0.81817	1
GO:0032854	positive regulation of Rap GTPase activi...	3	1.25	0.1183	0.759543222116301	0	0.43	1	1	1	0.35	0.30449	0.861801018600531	2	0.23	0.01943	1
GO:0032957	inositol trisphosphate metabolic process	3	1.25	0.1183	0.759543222116301	0	0.49	1	1	3	0.56	0.01468	0.271113294797688	1	0.3	0.26605	1
GO:0032963	collagen metabolic process	18	13.21	0.10412	0.759543222116301	5	4.7	0.50921	1	11	5.88	0.03183	0.388877142857143	3	2.65	0.49873	1
GO:0032967	positive regulation of collagen biosynth...	5	2.64	0.1132	0.759543222116301	1	0.98	0.63492	1	4	1.26	0.03317	0.389625551470588	0	0.64	1	1
GO:0033005	positive regulation of mast cell activat...	3	1.25	0.1183	0.759543222116301	2	0.49	0.0814	1	2	0.49	0.08128	0.537317342799189	0	0.27	1	1
GO:0033173	calcineurin-NFAT signaling cascade	3	1.25	0.1183	0.759543222116301	1	0.55	0.43254	1	0	0.35	1	1	2	0.23	0.01943	1
GO:0033275	actin-myosin filament sliding	8	4.87	0.10356	0.759543222116301	3	1.59	0.20928	1	1	2.03	0.87858	1	3	0.83	0.04879	1
GO:0034308	primary alcohol metabolic process	4	1.95	0.11874	0.759543222116301	1	0.67	0.49971	1	0	0.56	1	1	3	0.3	0.00262	1
GO:0035066	positive regulation of histone acetylati...	4	1.95	0.11874	0.759543222116301	0	0.73	1	1	4	0.91	0.01024	0.234529032258065	0	0.42	1	1
GO:0035278	negative regulation of translation invol...	3	1.25	0.1183	0.759543222116301	1	0.55	0.43254	1	2	0.56	0.10349	0.586780035492458	0	0.3	1	1
GO:0035556	intracellular signal transduction	276	258.59	0.10915	0.759543222116301	86	97.09	0.9089	1	140	117.45	0.01173	0.24596262295082	58	56.83	0.45446	1
GO:0035773	insulin secretion involved in cellular r...	7	4.17	0.11326	0.759543222116301	2	1.59	0.47665	1	4	2.03	0.14159	0.682837811320755	1	0.95	0.61998	1
GO:0038096	Fc-gamma receptor signaling pathway invo...	13	9.04	0.11009	0.759543222116301	2	3.6	0.88279	1	9	4.2	0.02284	0.326504697986577	2	2.12	0.63266	1
GO:0040033	negative regulation of translation, ncRN...	3	1.25	0.1183	0.759543222116301	1	0.55	0.43254	1	2	0.56	0.10349	0.586780035492458	0	0.3	1	1
GO:0042439	ethanolamine-containing compound metabol...	14	9.88	0.10939	0.759543222116301	7	4.03	0.106	1	6	4.27	0.25376	0.846065015479876	2	2.12	0.63266	1
GO:0042558	pteridine-containing compound metabolic ...	6	3.34	0.10581	0.759543222116301	3	1.22	0.11907	1	2	1.33	0.38825	0.896399366420275	2	0.68	0.14739	1
GO:0042592	homeostatic process	156	142.86	0.1172	0.759543222116301	50	52.33	0.65801	1	76	62.61	0.04125	0.423710747663551	32	29.95	0.37272	1
GO:0042771	intrinsic apoptotic signaling pathway in...	8	4.87	0.10356	0.759543222116301	3	1.77	0.25882	1	3	2.38	0.42908	0.922374418604651	2	1.14	0.31562	1
GO:0043092	L-amino acid import	3	1.25	0.1183	0.759543222116301	1	0.49	0.39565	1	2	0.56	0.10349	0.586780035492458	0	0.3	1	1
GO:0043506	regulation of JUN kinase activity	13	9.04	0.11009	0.759543222116301	5	3.23	0.22031	1	8	4.34	0.06632	0.509356730769231	1	1.97	0.86675	1
GO:0043933	macromolecular complex subunit organizat...	187	172.76	0.1176	0.759543222116301	72	65.87	0.22215	1	87	79.28	0.18555	0.744591342534504	31	38.71	0.9269	1
GO:0044728	DNA methylation or demethylation	11	7.37	0.11011	0.759543222116301	3	2.81	0.53832	1	4	3.36	0.43622	0.922374418604651	4	1.63	0.07878	1
GO:0045058	T cell selection	8	5.01	0.11777	0.759543222116301	1	1.83	0.84903	1	4	2.17	0.16865	0.723270805369127	2	0.99	0.2588	1
GO:0045124	regulation of bone resorption	7	4.17	0.11326	0.759543222116301	3	1.52	0.19326	1	3	1.89	0.29254	0.861801018600531	0	0.87	1	1
GO:0045321	leukocyte activation	80	69.97	0.1061	0.759543222116301	21	26.16	0.88113	1	40	30.39	0.04409	0.429474237804878	20	14.79	0.104	1
GO:0045667	regulation of osteoblast differentiation	17	12.52	0.11428	0.759543222116301	5	4.51	0.47378	1	8	5.88	0.23375	0.813414720260728	4	2.81	0.30818	1
GO:0045776	negative regulation of blood pressure	8	5.01	0.11777	0.759543222116301	4	2.01	0.13906	1	3	2.52	0.46664	0.943680638297872	1	1.29	0.73193	1
GO:0045911	positive regulation of DNA recombination	3	1.25	0.1183	0.759543222116301	2	0.55	0.10055	1	1	0.35	0.30449	0.861801018600531	0	0.19	1	1
GO:0045974	regulation of translation, ncRNA-mediate...	3	1.25	0.1183	0.759543222116301	1	0.55	0.43254	1	2	0.56	0.10349	0.586780035492458	0	0.3	1	1
GO:0046185	aldehyde catabolic process	3	1.25	0.1183	0.759543222116301	0	0.49	1	1	0	0.49	1	1	2	0.27	0.02652	1
GO:0046209	nitric oxide metabolic process	12	8.21	0.11038	0.759543222116301	4	3.05	0.36412	1	5	3.29	0.23068	0.807253669222344	3	1.78	0.26316	1
GO:0046324	regulation of glucose import	9	5.7	0.10704	0.759543222116301	3	2.38	0.42795	1	5	2.59	0.11362	0.615803053435115	2	1.4	0.41205	1
GO:0046661	male sex differentiation	22	16.83	0.11123	0.759543222116301	7	6.34	0.45053	1	12	7.21	0.05576	0.484588279301746	3	3.53	0.69071	1
GO:0046888	negative regulation of hormone secretion	10	6.54	0.10909	0.759543222116301	7	2.68	0.01619	1	3	2.94	0.57179	1	0	1.52	1	1
GO:0048241	epinephrine transport	3	1.25	0.1183	0.759543222116301	2	0.37	0.04727	1	1	0.63	0.47989	0.943680638297872	0	0.27	1	1
GO:0048333	mesodermal cell differentiation	6	3.34	0.10581	0.759543222116301	1	1.28	0.73363	1	4	1.61	0.07295	0.524353768278965	1	0.76	0.53875	1
GO:0048646	anatomical structure formation involved ...	122	109.89	0.10934	0.759543222116301	35	41.72	0.88594	1	71	51.26	0.00277	0.118002	20	24.87	0.87507	1
GO:0048839	inner ear development	27	21.42	0.11876	0.759543222116301	9	8.36	0.45877	1	15	10.15	0.08259	0.537317342799189	6	5.08	0.39841	1
GO:0050727	regulation of inflammatory response	34	27.54	0.11059	0.759543222116301	13	10.19	0.21902	1	15	11.49	0.17424	0.729988043478261	7	5.65	0.33585	1
GO:0050777	negative regulation of immune response	11	7.37	0.11011	0.759543222116301	6	2.87	0.06443	1	4	3.01	0.35529	0.876226592049402	2	1.52	0.45135	1
GO:0050795	regulation of behavior	25	19.47	0.11075	0.759543222116301	6	7.44	0.76222	1	11	8.61	0.24254	0.834272903225806	6	4.21	0.24479	1
GO:0050908	detection of light stimulus involved in ...	3	1.25	0.1183	0.759543222116301	1	0.43	0.35637	1	1	0.42	0.35322	0.874768965517241	1	0.19	0.17576	1
GO:0050951	sensory perception of temperature stimul...	4	1.95	0.11874	0.759543222116301	2	0.61	0.12078	1	1	0.98	0.63838	1	1	0.45	0.37128	1
GO:0050962	detection of light stimulus involved in ...	3	1.25	0.1183	0.759543222116301	1	0.43	0.35637	1	1	0.42	0.35322	0.874768965517241	1	0.19	0.17576	1
GO:0051017	actin filament bundle assembly	16	11.55	0.10712	0.759543222116301	1	4.27	0.98798	1	12	5.67	0.01032	0.234679003558719	5	2.77	0.1428	1
GO:0051259	protein oligomerization	54	45.9	0.11169	0.759543222116301	20	17.26	0.27822	1	25	21.43	0.23763	0.823011219512195	10	10.31	0.58592	1
GO:0051339	regulation of lyase activity	13	9.04	0.11009	0.759543222116301	7	3.48	0.05695	1	7	4.13	0.11663	0.623238712374582	1	2.2	0.89448	1
GO:0051668	localization within membrane	9	5.7	0.10704	0.759543222116301	3	2.07	0.3438	1	5	2.59	0.11362	0.615803053435115	1	1.21	0.71031	1
GO:0055002	striated muscle cell development	20	15.16	0.11609	0.759543222116301	3	5.67	0.92883	1	13	7	0.02192	0.319789795918367	4	3.37	0.43793	1
GO:0055086	nucleobase-containing small molecule met...	141	127.83	0.10537	0.759543222116301	51	46.72	0.27196	1	62	58.27	0.3187	0.874768965517241	31	27.98	0.29935	1
GO:0060263	regulation of respiratory burst	3	1.25	0.1183	0.759543222116301	0	0.43	1	1	3	0.56	0.01468	0.271113294797688	0	0.23	1	1
GO:0060343	trabecula formation	6	3.34	0.10581	0.759543222116301	1	1.28	0.73363	1	3	1.61	0.21542	0.786590742857143	2	0.76	0.17443	1
GO:0060346	bone trabecula formation	3	1.25	0.1183	0.759543222116301	1	0.43	0.35637	1	2	0.63	0.12709	0.637799060297572	0	0.27	1	1
GO:0060457	negative regulation of digestive system ...	3	1.25	0.1183	0.759543222116301	1	0.3	0.27	1	2	0.63	0.12709	0.637799060297572	0	0.23	1	1
GO:0060612	adipose tissue development	5	2.64	0.1132	0.759543222116301	1	0.79	0.55894	1	3	1.19	0.11175	0.612946351931331	2	0.53	0.09662	1
GO:0060795	cell fate commitment involved in formati...	7	4.17	0.11326	0.759543222116301	1	1.71	0.82872	1	5	1.96	0.04257	0.423710747663551	1	1.02	0.64833	1
GO:0061298	retina vasculature development in camera...	4	1.95	0.11874	0.759543222116301	0	0.73	1	1	3	0.91	0.05771	0.484588279301746	1	0.45	0.37128	1
GO:0061572	actin filament bundle organization	16	11.55	0.10712	0.759543222116301	1	4.27	0.98798	1	12	5.67	0.01032	0.234679003558719	5	2.77	0.1428	1
GO:0070169	positive regulation of biomineral tissue...	7	4.17	0.11326	0.759543222116301	1	1.71	0.82872	1	4	1.96	0.12876	0.638801552795031	2	1.02	0.27304	1
GO:0071248	cellular response to metal ion	15	10.71	0.10838	0.759543222116301	6	3.9	0.19398	1	7	4.62	0.17747	0.729988043478261	3	2.27	0.39885	1
GO:0071435	potassium ion export	3	1.25	0.1183	0.759543222116301	0	0.55	1	1	3	0.63	0.02088	0.31100979020979	0	0.34	1	1
GO:0071549	cellular response to dexamethasone stimu...	3	1.25	0.1183	0.759543222116301	0	0.49	1	1	3	0.56	0.01468	0.271113294797688	0	0.27	1	1
GO:0072010	glomerular epithelium development	4	1.95	0.11874	0.759543222116301	3	0.73	0.03284	1	2	0.91	0.22991	0.807253669222344	0	0.42	1	1
GO:0072311	glomerular epithelial cell differentiati...	4	1.95	0.11874	0.759543222116301	3	0.73	0.03284	1	2	0.91	0.22991	0.807253669222344	0	0.42	1	1
GO:0072337	modified amino acid transport	4	1.95	0.11874	0.759543222116301	2	0.61	0.12078	1	1	0.77	0.55025	0.987402461538462	1	0.3	0.26605	1
GO:0086003	cardiac muscle cell contraction	8	5.01	0.11777	0.759543222116301	2	1.95	0.58946	1	6	2.45	0.0328	0.389625551470588	1	1.25	0.72133	1
GO:0086004	regulation of cardiac muscle cell contra...	8	4.87	0.10356	0.759543222116301	2	1.89	0.57198	1	6	2.38	0.02882	0.364672871287129	1	1.21	0.71031	1
GO:0086014	atrial cardiac muscle cell action potent...	3	1.25	0.1183	0.759543222116301	1	0.49	0.39565	1	2	0.56	0.10349	0.586780035492458	1	0.3	0.26605	1
GO:0086026	atrial cardiac muscle cell to AV node ce...	3	1.25	0.1183	0.759543222116301	1	0.49	0.39565	1	2	0.56	0.10349	0.586780035492458	1	0.3	0.26605	1
GO:0086066	atrial cardiac muscle cell to AV node ce...	3	1.25	0.1183	0.759543222116301	1	0.49	0.39565	1	2	0.56	0.10349	0.586780035492458	1	0.3	0.26605	1
GO:0090257	regulation of muscle system process	27	21.28	0.11207	0.759543222116301	9	8.17	0.43235	1	17	10.08	0.02338	0.330526991150442	2	5.16	0.96773	1
GO:0090279	regulation of calcium ion import	5	2.64	0.1132	0.759543222116301	3	1.04	0.0811	1	2	0.98	0.2566	0.846065015479876	0	0.49	1	1
GO:0090322	regulation of superoxide metabolic proce...	4	1.95	0.11874	0.759543222116301	1	0.73	0.53026	1	2	0.84	0.20341	0.761446924428822	1	0.42	0.34648	1
GO:0097190	apoptotic signaling pathway	74	64.68	0.11518	0.759543222116301	26	24.58	0.41168	1	33	29.83	0.29616	0.861801018600531	17	14.48	0.28125	1
GO:1900543	negative regulation of purine nucleotide...	8	4.87	0.10356	0.759543222116301	5	2.01	0.0478	1	2	2.17	0.64924	1	2	1.18	0.3297	1
GO:1900744	regulation of p38MAPK cascade	3	1.25	0.1183	0.759543222116301	2	0.49	0.0814	1	1	0.56	0.44069	0.922374418604651	0	0.27	1	1
GO:1901575	organic substance catabolic process	258	241.34	0.11308	0.759543222116301	103	88.86	0.05506	1	113	108.06	0.31263	0.863907003891051	50	51.6	0.62098	1
GO:1901699	cellular response to nitrogen compound	67	57.73	0.10418	0.759543222116301	24	21.22	0.29409	1	31	26.26	0.18928	0.755464834478451	17	12.89	0.14821	1
GO:1902165	regulation of intrinsic apoptotic signal...	3	1.25	0.1183	0.759543222116301	0	0.43	1	1	1	0.56	0.44069	0.922374418604651	2	0.27	0.02652	1
GO:2000463	positive regulation of excitatory postsy...	3	1.25	0.1183	0.759543222116301	1	0.43	0.35637	1	3	0.63	0.02088	0.31100979020979	0	0.27	1	1
GO:2001238	positive regulation of extrinsic apoptot...	10	6.54	0.10909	0.759543222116301	5	2.5	0.10207	1	5	3.01	0.18004	0.732774267515924	1	1.4	0.76139	1
GO:1901214	regulation of neuron death	29	23.23	0.11936	0.762653561904762	7	8.36	0.73813	1	21	11.14	0.00357	0.129615340909091	3	5.31	0.90514	1
GO:0045926	negative regulation of growth	31	25.04	0.11957	0.763268439581351	6	9.27	0.90855	1	18	11.49	0.03812	0.412701015228426	7	5.65	0.33585	1
GO:0002250	adaptive immune response	30	24.2	0.12275	0.765469667896679	10	9.15	0.4328	1	17	9.59	0.01495	0.273674571428571	6	4.59	0.3101	1
GO:0002479	antigen processing and presentation of e...	12	8.35	0.12145	0.765469667896679	5	3.11	0.19819	1	6	4.13	0.23013	0.807253669222344	3	1.93	0.30486	1
GO:0002708	positive regulation of lymphocyte mediat...	10	6.68	0.12155	0.765469667896679	4	2.62	0.26598	1	7	2.73	0.01724	0.288623255813953	1	1.36	0.75195	1
GO:0006629	lipid metabolic process	148	135.35	0.12065	0.765469667896679	55	50.07	0.2469	1	65	57.57	0.16146	0.709580055020633	31	27.83	0.28865	1
GO:0006959	humoral immune response	17	12.66	0.12328	0.765469667896679	3	4.45	0.83081	1	6	4.83	0.35333	0.874768965517241	7	2.2	0.00603	1
GO:0007616	long-term memory	6	3.48	0.12368	0.765469667896679	1	1.34	0.74991	1	4	1.61	0.07295	0.524353768278965	1	0.76	0.53875	1
GO:0007632	visual behavior	9	5.84	0.12032	0.765469667896679	2	2.2	0.65405	1	6	2.66	0.04679	0.436804796511628	1	1.25	0.72133	1
GO:0008625	extrinsic apoptotic signaling pathway vi...	12	8.35	0.12145	0.765469667896679	3	3.11	0.60924	1	7	3.85	0.08769	0.555891964285714	2	1.78	0.53687	1
GO:0009266	response to temperature stimulus	18	13.49	0.12092	0.765469667896679	4	5.06	0.7536	1	7	6.37	0.45573	0.943680638297872	7	3.18	0.03969	1
GO:0010470	regulation of gastrulation	6	3.48	0.12368	0.765469667896679	1	1.46	0.77955	1	4	1.75	0.09349	0.575530924855491	1	0.91	0.60496	1
GO:0015844	monoamine transport	11	7.51	0.12183	0.765469667896679	3	2.62	0.49241	1	6	3.43	0.12555	0.637799060297572	3	1.52	0.19258	1
GO:0016477	cell migration	129	117.12	0.12066	0.765469667896679	39	44.28	0.82338	1	68	52.73	0.01663	0.285170744680851	23	25.44	0.72577	1
GO:0021700	developmental maturation	30	24.2	0.12275	0.765469667896679	5	8.72	0.94182	1	19	11.28	0.01726	0.288623255813953	7	5.31	0.28104	1
GO:0032720	negative regulation of tumor necrosis fa...	6	3.48	0.12368	0.765469667896679	3	1.34	0.14737	1	0	1.47	1	1	2	0.76	0.17443	1
GO:0032874	positive regulation of stress-activated ...	12	8.35	0.12145	0.765469667896679	6	2.62	0.04476	1	5	3.78	0.32681	0.874768965517241	1	1.55	0.79571	1
GO:0038094	Fc-gamma receptor signaling pathway	13	9.18	0.12057	0.765469667896679	2	3.6	0.88279	1	9	4.27	0.0252	0.341702542372881	2	2.12	0.63266	1
GO:0042278	purine nucleoside metabolic process	93	82.9	0.12277	0.765469667896679	29	29.95	0.60092	1	46	38.38	0.11206	0.613593316195373	20	18.31	0.3738	1
GO:0044087	regulation of cellular component biogene...	59	50.91	0.12321	0.765469667896679	20	19.52	0.48851	1	32	24.02	0.05815	0.484588279301746	9	11.9	0.84829	1
GO:0046883	regulation of hormone secretion	32	26.01	0.12269	0.765469667896679	11	10.06	0.42508	1	16	11.63	0.11989	0.637799060297572	5	5.88	0.70535	1
GO:0048145	regulation of fibroblast proliferation	12	8.35	0.12145	0.765469667896679	6	3.29	0.10924	1	4	3.92	0.55827	0.994009888579387	2	2.05	0.61279	1
GO:0048610	cellular process involved in reproductio...	59	50.91	0.12321	0.765469667896679	20	19.09	0.44782	1	27	21.99	0.15544	0.698005340829234	14	10.77	0.19048	1
GO:0051155	positive regulation of striated muscle c...	6	3.48	0.12368	0.765469667896679	1	1.34	0.74991	1	5	1.61	0.01942	0.305212776412776	0	0.8	1	1
GO:0051492	regulation of stress fiber assembly	9	5.84	0.12032	0.765469667896679	1	2.2	0.89664	1	6	2.94	0.07045	0.513312998859749	2	1.4	0.41205	1
GO:0051865	protein autoubiquitination	6	3.48	0.12368	0.765469667896679	5	1.34	0.00918	1	1	1.61	0.81209	1	0	0.76	1	1
GO:0060071	Wnt signaling pathway, planar cell polar...	6	3.48	0.12368	0.765469667896679	1	1.28	0.73363	1	5	1.75	0.02733	0.358179754601227	0	0.8	1	1
GO:0060487	lung epithelial cell differentiation	6	3.48	0.12368	0.765469667896679	3	1.4	0.16226	1	2	1.54	0.46235	0.943680638297872	1	0.8	0.55627	1
GO:0070664	negative regulation of leukocyte prolife...	9	5.84	0.12032	0.765469667896679	4	2.32	0.1994	1	4	2.38	0.21223	0.783901560693642	1	1.25	0.72133	1
GO:0071331	cellular response to hexose stimulus	12	8.35	0.12145	0.765469667896679	3	3.05	0.59565	1	7	3.99	0.10159	0.586780035492458	2	1.9	0.57062	1
GO:0071396	cellular response to lipid	38	31.44	0.12108	0.765469667896679	9	12.01	0.85667	1	20	13.87	0.06216	0.491587128712871	10	7.01	0.1648	1
GO:0071900	regulation of protein serine/threonine k...	55	47.16	0.12224	0.765469667896679	23	17.99	0.13396	1	29	21.99	0.07592	0.537317342799189	8	10.69	0.84499	1
GO:0090175	regulation of establishment of planar po...	6	3.48	0.12368	0.765469667896679	1	1.28	0.73363	1	5	1.75	0.02733	0.358179754601227	0	0.8	1	1
GO:1902229	regulation of intrinsic apoptotic signal...	6	3.48	0.12368	0.765469667896679	2	1.28	0.36953	1	2	1.61	0.48587	0.943680638297872	2	0.83	0.20218	1
GO:2000243	positive regulation of reproductive proc...	6	3.48	0.12368	0.765469667896679	1	1.28	0.73363	1	5	1.61	0.01942	0.305212776412776	1	0.76	0.53875	1
GO:0043241	protein complex disassembly	25	19.75	0.12492	0.772431594470046	13	8.23	0.06801	1	10	9.1	0.42681	0.922374418604651	3	4.78	0.86221	1
GO:0016032	viral process	86	76.37	0.1252	0.773450092081031	42	28.97	0.00934	1	33	34.81	0.6539	1	13	16.64	0.85739	1
GO:0031400	negative regulation of protein modificat...	51	43.54	0.12566	0.774399724517906	21	16.28	0.13817	1	27	20.66	0.09168	0.574537829912024	7	9.89	0.87169	1
GO:0044106	cellular amine metabolic process	27	21.56	0.1257	0.774399724517906	11	8.11	0.18783	1	12	9.87	0.28339	0.861801018600531	6	4.74	0.33705	1
GO:0046942	carboxylic acid transport	33	26.99	0.12567	0.774399724517906	9	10.19	0.69711	1	16	11.98	0.14399	0.687151680358477	10	5.88	0.07005	1
GO:0019080	viral gene expression	22	17.11	0.12661	0.779290357798165	14	6.46	0.00492	1	6	7.77	0.79858	1	1	3.6	0.97506	1
GO:0001503	ossification	43	36.72	0.14959	0.78032486631016	13	13.66	0.6148	1	22	17.37	0.14921	0.692272805139186	9	8.38	0.46172	1
GO:0001783	B cell apoptotic process	4	2.09	0.14497	0.78032486631016	1	0.85	0.58588	1	1	0.98	0.63838	1	2	0.49	0.08488	1
GO:0001933	negative regulation of protein phosphory...	34	28.38	0.14815	0.78032486631016	14	10.8	0.19199	1	19	13.17	0.06748	0.511713547646384	4	6.44	0.89124	1
GO:0001976	neurological system process involved in ...	4	2.09	0.14497	0.78032486631016	1	0.79	0.55894	1	3	1.05	0.08281	0.537317342799189	0	0.49	1	1
GO:0001977	renal system process involved in regulat...	4	2.09	0.14497	0.78032486631016	3	0.73	0.03284	1	1	0.84	0.58178	1	0	0.42	1	1
GO:0002385	mucosal immune response	3	1.39	0.15225	0.78032486631016	0	0.49	1	1	1	0.42	0.35322	0.874768965517241	NA	NA	NA	NA
GO:0002792	negative regulation of peptide secretion	7	4.45	0.14723	0.78032486631016	3	1.83	0.27568	1	3	2.1	0.35154	0.874768965517241	1	1.06	0.6617	1
GO:0002866	positive regulation of acute inflammator...	2	0.7	0.14504	0.78032486631016	NA	NA	NA	NA	NA	NA	NA	NA	NA	NA	NA	NA
GO:0003100	regulation of systemic arterial blood pr...	2	0.7	0.14504	0.78032486631016	1	0.3	0.27	1	1	0.35	0.30449	0.861801018600531	0	0.19	1	1
GO:0003257	positive regulation of transcription fro...	2	0.7	0.14504	0.78032486631016	NA	NA	NA	NA	1	0.35	0.30449	0.861801018600531	NA	NA	NA	NA
GO:0003402	planar cell polarity pathway involved in...	2	0.7	0.14504	0.78032486631016	NA	NA	NA	NA	1	0.35	0.30449	0.861801018600531	NA	NA	NA	NA
GO:0006000	fructose metabolic process	3	1.39	0.15225	0.78032486631016	0	0.37	1	1	0	0.56	1	1	3	0.27	0.00169	1
GO:0006067	ethanol metabolic process	3	1.39	0.15225	0.78032486631016	1	0.49	0.39565	1	0	0.42	1	1	2	0.23	0.01943	1
GO:0006089	lactate metabolic process	2	0.7	0.14504	0.78032486631016	0	0.3	1	1	1	0.35	0.30449	0.861801018600531	1	0.19	0.17576	1
GO:0006104	succinyl-CoA metabolic process	2	0.7	0.14504	0.78032486631016	2	0.3	0.03283	1	1	0.35	0.30449	0.861801018600531	0	0.19	1	1
GO:0006307	DNA dealkylation involved in DNA repair	2	0.7	0.14504	0.78032486631016	0	0.3	1	1	1	0.35	0.30449	0.861801018600531	1	0.19	0.17576	1
GO:0006449	regulation of translational termination	2	0.7	0.14504	0.78032486631016	1	0.3	0.27	1	1	0.35	0.30449	0.861801018600531	0	0.19	1	1
GO:0006520	cellular amino acid metabolic process	59	51.33	0.13715	0.78032486631016	25	18.17	0.06489	1	20	22.76	0.75983	1	12	10.62	0.37318	1
GO:0006685	sphingomyelin catabolic process	2	0.7	0.14504	0.78032486631016	NA	NA	NA	NA	0	0.35	1	1	NA	NA	NA	NA
GO:0006740	NADPH regeneration	4	2.09	0.14497	0.78032486631016	1	0.67	0.49971	1	3	0.91	0.05771	0.484588279301746	0	0.38	1	1
GO:0006753	nucleoside phosphate metabolic process	134	122.55	0.13436	0.78032486631016	48	44.64	0.31776	1	59	55.96	0.35118	0.874768965517241	30	26.84	0.28651	1
GO:0006814	sodium ion transport	23	18.36	0.14789	0.78032486631016	6	7.2	0.7336	1	10	7.91	0.26695	0.861801018600531	8	4.02	0.04776	1
GO:0006817	phosphate ion transport	4	2.09	0.14497	0.78032486631016	1	0.79	0.55894	1	2	0.84	0.20341	0.761446924428822	1	0.38	0.3207	1
GO:0006935	chemotaxis	85	76.09	0.14397	0.78032486631016	18	28.36	0.98853	1	51	35.44	0.00509	0.161015346534653	16	16.83	0.62081	1
GO:0007140	male meiosis	7	4.45	0.14723	0.78032486631016	4	1.77	0.09722	1	1	1.89	0.85955	1	2	0.95	0.24457	1
GO:0007171	activation of transmembrane receptor pro...	3	1.39	0.15225	0.78032486631016	0	0.61	1	1	2	0.63	0.12709	0.637799060297572	1	0.34	0.2939	1
GO:0007188	adenylate cyclase-modulating G-protein c...	19	14.47	0.12709	0.78032486631016	9	5.37	0.08715	1	7	6.79	0.524	0.974493597206054	2	3.26	0.84326	1
GO:0007216	G-protein coupled glutamate receptor sig...	3	1.39	0.15225	0.78032486631016	2	0.55	0.10055	1	2	0.63	0.12709	0.637799060297572	0	0.34	1	1
GO:0007270	neuron-neuron synaptic transmission	16	12.1	0.14573	0.78032486631016	5	4.57	0.48569	1	9	5.81	0.1254	0.637799060297572	3	2.88	0.55451	1
GO:0007340	acrosome reaction	5	2.78	0.13453	0.78032486631016	1	1.1	0.67816	1	4	0.91	0.01024	0.234529032258065	1	0.45	0.37128	1
GO:0007600	sensory perception	64	56.34	0.14787	0.78032486631016	20	20.13	0.54572	1	28	23.67	0.20065	0.761446924428822	17	11.34	0.06213	1
GO:0007635	chemosensory behavior	3	1.39	0.15225	0.78032486631016	1	0.37	0.31454	1	3	0.63	0.02088	0.31100979020979	0	0.27	1	1
GO:0008038	neuron recognition	7	4.31	0.12969	0.78032486631016	0	1.83	1	1	6	2.1	0.01612	0.282210410958904	1	1.1	0.67457	1
GO:0009108	coenzyme biosynthetic process	16	11.96	0.13544	0.78032486631016	7	4.45	0.15588	1	7	5.39	0.2932	0.861801018600531	3	2.69	0.50827	1
GO:0009117	nucleotide metabolic process	133	121.85	0.14038	0.78032486631016	48	44.34	0.30028	1	59	55.61	0.33243	0.874768965517241	29	26.65	0.34354	1
GO:0009141	nucleoside triphosphate metabolic proces...	87	77.62	0.13347	0.78032486631016	28	27.87	0.51906	1	42	36.07	0.16734	0.723270805369127	20	17.06	0.26123	1
GO:0009260	ribonucleotide biosynthetic process	31	25.32	0.13261	0.78032486631016	12	9.33	0.2233	1	14	11.42	0.25137	0.846065015479876	8	5.65	0.20435	1
GO:0009719	response to endogenous stimulus	166	153.15	0.1299	0.78032486631016	49	56.6	0.87971	1	88	68.77	0.00835	0.213673517786561	37	33.4	0.27726	1
GO:0009743	response to carbohydrate	24	18.92	0.12812	0.78032486631016	8	7.14	0.42216	1	14	8.54	0.04574	0.436804796511628	4	4.25	0.61889	1
GO:0010544	negative regulation of platelet activati...	3	1.39	0.15225	0.78032486631016	0	0.61	1	1	3	0.7	0.02831	0.3618018	0	0.38	1	1
GO:0010562	positive regulation of phosphorus metabo...	105	94.73	0.13308	0.78032486631016	33	35.31	0.68641	1	52	42.72	0.07829	0.537317342799189	22	20.51	0.3976	1
GO:0010569	regulation of double-strand break repair...	3	1.39	0.15225	0.78032486631016	3	0.55	0.01437	1	0	0.56	1	1	0	0.3	1	1
GO:0010574	regulation of vascular endothelial growt...	5	2.78	0.13453	0.78032486631016	0	1.16	1	1	4	1.19	0.02727	0.358179754601227	1	0.64	0.48192	1
GO:0010635	regulation of mitochondrial fusion	2	0.7	0.14504	0.78032486631016	2	0.3	0.03283	1	0	0.35	1	1	0	0.19	1	1
GO:0010714	positive regulation of collagen metaboli...	5	2.78	0.13453	0.78032486631016	1	1.04	0.65722	1	4	1.26	0.03317	0.389625551470588	0	0.64	1	1
GO:0010919	regulation of inositol phosphate biosynt...	3	1.39	0.15225	0.78032486631016	0	0.49	1	1	3	0.56	0.01468	0.271113294797688	1	0.3	0.26605	1
GO:0010975	regulation of neuron projection developm...	37	31.16	0.14913	0.78032486631016	8	11.04	0.86961	1	26	14.71	0.00317	0.123514024390244	3	6.6	0.96377	1
GO:0014706	striated muscle tissue development	45	38.39	0.1417	0.78032486631016	12	14.94	0.82297	1	26	18.21	0.04153	0.423710747663551	9	9.02	0.55174	1
GO:0015697	quaternary ammonium group transport	4	2.09	0.14497	0.78032486631016	0	0.85	1	1	3	0.98	0.06975	0.511713547646384	2	0.53	0.09662	1
GO:0015749	monosaccharide transport	19	14.47	0.12709	0.78032486631016	7	5.49	0.3092	1	11	6.44	0.05597	0.484588279301746	3	3.26	0.63874	1
GO:0015813	L-glutamate transport	4	2.09	0.14497	0.78032486631016	1	0.85	0.58588	1	2	1.05	0.28334	0.861801018600531	1	0.57	0.44021	1
GO:0015849	organic acid transport	33	27.12	0.13205	0.78032486631016	9	10.19	0.69711	1	16	12.05	0.14911	0.692272805139186	10	5.88	0.07005	1
GO:0015874	norepinephrine transport	4	2.09	0.14497	0.78032486631016	0	0.61	1	1	4	1.05	0.01748	0.288623255813953	0	0.42	1	1
GO:0016049	cell growth	53	45.63	0.13375	0.78032486631016	12	17.02	0.92533	1	32	21.08	0.0116	0.244633663366337	10	10.16	0.56685	1
GO:0016199	axon midline choice point recognition	2	0.7	0.14504	0.78032486631016	0	0.3	1	1	2	0.35	0.04249	0.423710747663551	0	0.19	1	1
GO:0016441	posttranscriptional gene silencing	7	4.31	0.12969	0.78032486631016	4	1.71	0.08783	1	2	1.89	0.57321	1	1	0.99	0.63443	1
GO:0019079	viral genome replication	11	7.65	0.13423	0.78032486631016	6	2.93	0.07003	1	3	3.36	0.66309	1	1	1.59	0.80349	1
GO:0019082	viral protein processing	3	1.39	0.15225	0.78032486631016	1	0.49	0.39565	1	1	0.7	0.51635	0.963069614711033	1	0.3	0.26605	1
GO:0019400	alditol metabolic process	5	2.78	0.13453	0.78032486631016	2	1.16	0.32421	1	0	1.19	1	1	3	0.64	0.02474	1
GO:0019852	L-ascorbic acid metabolic process	3	1.39	0.15225	0.78032486631016	0	0.61	1	1	3	0.7	0.02831	0.3618018	0	0.38	1	1
GO:0021521	ventral spinal cord interneuron specific...	3	1.39	0.15225	0.78032486631016	1	0.49	0.39565	1	2	0.7	0.15178	0.692272805139186	0	0.34	1	1
GO:0021761	limbic system development	13	9.32	0.1316	0.78032486631016	4	3.66	0.50208	1	10	4.41	0.01157	0.244633663366337	0	2.2	1	1
GO:0023056	positive regulation of signaling	137	125.19	0.12914	0.78032486631016	40	47.02	0.88246	1	71	56.38	0.02369	0.333434140969163	30	27.07	0.30283	1
GO:0030183	B cell differentiation	14	10.29	0.14073	0.78032486631016	2	3.6	0.88279	1	7	4.62	0.17747	0.729988043478261	7	2.2	0.00603	1
GO:0030203	glycosaminoglycan metabolic process	25	20.17	0.14815	0.78032486631016	11	7.44	0.12454	1	10	9.03	0.41718	0.922096229678312	5	4.21	0.41274	1
GO:0030574	collagen catabolic process	12	8.62	0.14538	0.78032486631016	4	2.93	0.33585	1	6	3.78	0.17459	0.729988043478261	2	1.59	0.47671	1
GO:0030809	negative regulation of nucleotide biosyn...	7	4.45	0.14723	0.78032486631016	5	1.83	0.03329	1	2	1.96	0.59329	1	1	1.06	0.6617	1
GO:0030815	negative regulation of cAMP metabolic pr...	7	4.45	0.14723	0.78032486631016	4	1.89	0.11732	1	2	2.03	0.61265	1	2	1.1	0.30147	1
GO:0030900	forebrain development	50	42.7	0.12902	0.78032486631016	13	16.41	0.84411	1	31	20.38	0.0125	0.252768987341772	7	9.93	0.87413	1
GO:0031110	regulation of microtubule polymerization...	8	5.29	0.14909	0.78032486631016	2	1.95	0.58946	1	6	2.45	0.0328	0.389625551470588	1	1.21	0.71031	1
GO:0031113	regulation of microtubule polymerization	5	2.78	0.13453	0.78032486631016	2	0.98	0.25491	1	4	1.26	0.03317	0.389625551470588	0	0.57	1	1
GO:0031214	biomineral tissue development	18	13.91	0.14896	0.78032486631016	4	5.31	0.78549	1	8	6.3	0.29441	0.861801018600531	7	3.15	0.03755	1
GO:0031274	positive regulation of pseudopodium asse...	3	1.39	0.15225	0.78032486631016	1	0.49	0.39565	1	0	0.63	1	1	1	0.3	0.26605	1
GO:0031343	positive regulation of cell killing	8	5.15	0.13296	0.78032486631016	3	1.95	0.30968	1	6	2.1	0.01612	0.282210410958904	1	0.99	0.63443	1
GO:0031396	regulation of protein ubiquitination	28	22.81	0.14391	0.78032486631016	11	8.6	0.24146	1	14	10.86	0.1968	0.761446924428822	5	5.12	0.5851	1
GO:0031642	negative regulation of myelination	2	0.7	0.14504	0.78032486631016	1	0.3	0.27	1	NA	NA	NA	NA	NA	NA	NA	NA
GO:0031643	positive regulation of myelination	2	0.7	0.14504	0.78032486631016	1	0.3	0.27	1	NA	NA	NA	NA	NA	NA	NA	NA
GO:0031646	positive regulation of neurological syst...	3	1.39	0.15225	0.78032486631016	2	0.61	0.12078	1	1	0.63	0.47989	0.943680638297872	0	0.34	1	1
GO:0032147	activation of protein kinase activity	36	30.19	0.14667	0.78032486631016	16	11.47	0.1105	1	17	13.66	0.20608	0.769188785046729	5	6.63	0.79908	1
GO:0032224	positive regulation of synaptic transmis...	2	0.7	0.14504	0.78032486631016	0	0.3	1	1	NA	NA	NA	NA	NA	NA	NA	NA
GO:0032318	regulation of Ras GTPase activity	33	27.12	0.13205	0.78032486631016	10	9.64	0.49901	1	17	12.61	0.12744	0.637799060297572	8	6.07	0.26135	1
GO:0032409	regulation of transporter activity	20	15.58	0.14171	0.78032486631016	6	5.85	0.53583	1	11	7.07	0.09495	0.577838571428571	5	3.68	0.3068	1
GO:0032410	negative regulation of transporter activ...	7	4.31	0.12969	0.78032486631016	3	1.65	0.22557	1	3	1.89	0.29254	0.861801018600531	2	1.06	0.28727	1
GO:0032488	Cdc42 protein signal transduction	4	2.09	0.14497	0.78032486631016	2	0.79	0.18605	1	2	0.84	0.20341	0.761446924428822	0	0.42	1	1
GO:0032489	regulation of Cdc42 protein signal trans...	4	2.09	0.14497	0.78032486631016	2	0.79	0.18605	1	2	0.84	0.20341	0.761446924428822	0	0.42	1	1
GO:0032606	type I interferon production	16	11.96	0.13544	0.78032486631016	8	4.51	0.0804	1	4	5.32	0.78868	1	3	2.54	0.46956	1
GO:0032691	negative regulation of interleukin-1 bet...	3	1.39	0.15225	0.78032486631016	1	0.61	0.46718	1	1	0.56	0.44069	0.922374418604651	1	0.34	0.2939	1
GO:0032693	negative regulation of interleukin-10 pr...	2	0.7	0.14504	0.78032486631016	1	0.3	0.27	1	NA	NA	NA	NA	NA	NA	NA	NA
GO:0032776	DNA methylation on cytosine	2	0.7	0.14504	0.78032486631016	1	0.3	0.27	1	NA	NA	NA	NA	NA	NA	NA	NA
GO:0032787	monocarboxylic acid metabolic process	59	51.19	0.1324	0.78032486631016	20	19.03	0.442	1	25	21.92	0.27417	0.861801018600531	17	10.58	0.03636	1
GO:0032881	regulation of polysaccharide metabolic p...	7	4.31	0.12969	0.78032486631016	3	1.65	0.22557	1	3	1.96	0.31219	0.863907003891051	1	0.99	0.63443	1
GO:0032960	regulation of inositol trisphosphate bio...	2	0.7	0.14504	0.78032486631016	NA	NA	NA	NA	NA	NA	NA	NA	NA	NA	NA	NA
GO:0033085	negative regulation of T cell differenti...	2	0.7	0.14504	0.78032486631016	NA	NA	NA	NA	1	0.35	0.30449	0.861801018600531	NA	NA	NA	NA
GO:0033564	anterior/posterior axon guidance	2	0.7	0.14504	0.78032486631016	NA	NA	NA	NA	2	0.35	0.04249	0.423710747663551	NA	NA	NA	NA
GO:0033993	response to lipid	85	75.81	0.13595	0.78032486631016	22	28.42	0.9192	1	46	32.85	0.01217	0.248454632587859	19	16.23	0.26986	1
GO:0034144	negative regulation of toll-like recepto...	2	0.7	0.14504	0.78032486631016	NA	NA	NA	NA	NA	NA	NA	NA	NA	NA	NA	NA
GO:0034587	piRNA metabolic process	3	1.39	0.15225	0.78032486631016	0	0.49	1	1	1	0.63	0.47989	0.943680638297872	2	0.27	0.02652	1
GO:0035112	genitalia morphogenesis	3	1.39	0.15225	0.78032486631016	1	0.55	0.43254	1	1	0.56	0.44069	0.922374418604651	1	0.3	0.26605	1
GO:0035194	posttranscriptional gene silencing by RN...	7	4.31	0.12969	0.78032486631016	4	1.71	0.08783	1	2	1.89	0.57321	1	1	0.99	0.63443	1
GO:0035413	positive regulation of catenin import in...	3	1.39	0.15225	0.78032486631016	0	0.61	1	1	2	0.56	0.10349	0.586780035492458	1	0.34	0.2939	1
GO:0035435	phosphate ion transmembrane transport	3	1.39	0.15225	0.78032486631016	0	0.49	1	1	2	0.56	0.10349	0.586780035492458	1	0.23	0.20702	1
GO:0035590	purinergic nucleotide receptor signaling...	2	0.7	0.14504	0.78032486631016	NA	NA	NA	NA	1	0.35	0.30449	0.861801018600531	NA	NA	NA	NA
GO:0036155	acylglycerol acyl-chain remodeling	2	0.7	0.14504	0.78032486631016	NA	NA	NA	NA	0	0.35	1	1	2	0.19	0.01328	1
GO:0038066	p38MAPK cascade	3	1.39	0.15225	0.78032486631016	2	0.49	0.0814	1	1	0.63	0.47989	0.943680638297872	0	0.27	1	1
GO:0042048	olfactory behavior	2	0.7	0.14504	0.78032486631016	NA	NA	NA	NA	2	0.35	0.04249	0.423710747663551	NA	NA	NA	NA
GO:0042110	T cell activation	50	43.26	0.15027	0.78032486631016	13	16.04	0.82131	1	23	18.84	0.18559	0.744591342534504	14	9.02	0.06846	1
GO:0042181	ketone biosynthetic process	6	3.62	0.14292	0.78032486631016	5	1.4	0.01115	1	1	1.4	0.76625	1	0	0.72	1	1
GO:0042310	vasoconstriction	12	8.62	0.14538	0.78032486631016	3	3.42	0.6725	1	4	3.99	0.57253	1	5	2.05	0.0529	1
GO:0042330	taxis	85	76.09	0.14397	0.78032486631016	18	28.36	0.98853	1	51	35.44	0.00509	0.161015346534653	16	16.83	0.62081	1
GO:0042362	fat-soluble vitamin biosynthetic process	4	2.09	0.14497	0.78032486631016	2	0.85	0.20879	1	0	0.63	1	1	1	0.34	0.2939	1
GO:0042461	photoreceptor cell development	7	4.31	0.12969	0.78032486631016	1	1.59	0.80568	1	3	1.96	0.31219	0.863907003891051	3	0.87	0.05458	1
GO:0042471	ear morphogenesis	19	14.74	0.1453	0.78032486631016	6	5.61	0.49371	1	10	7.35	0.19931	0.761446924428822	4	3.53	0.47165	1
GO:0042475	odontogenesis of dentin-containing tooth	14	10.29	0.14073	0.78032486631016	6	3.9	0.19398	1	6	4.9	0.36609	0.893209278350516	2	2.35	0.6875	1
GO:0042976	activation of Janus kinase activity	3	1.39	0.15225	0.78032486631016	1	0.49	0.39565	1	1	0.56	0.44069	0.922374418604651	2	0.27	0.02652	1
GO:0042981	regulation of apoptotic process	154	142.02	0.13914	0.78032486631016	52	53.3	0.59881	1	72	65.62	0.21324	0.786590742857143	34	31.66	0.35512	1
GO:0043065	positive regulation of apoptotic process	52	44.93	0.14252	0.78032486631016	16	17.32	0.66638	1	29	20.31	0.03273	0.389625551470588	8	10.12	0.79987	1
GO:0043067	regulation of programmed cell death	155	143.55	0.15148	0.78032486631016	53	53.98	0.57929	1	72	66.25	0.239	0.826412337662338	34	32	0.37975	1
GO:0043090	amino acid import	3	1.39	0.15225	0.78032486631016	1	0.55	0.43254	1	2	0.63	0.12709	0.637799060297572	0	0.34	1	1
GO:0043113	receptor clustering	5	2.78	0.13453	0.78032486631016	0	0.85	1	1	5	1.33	0.00846	0.213673517786561	0	0.49	1	1
GO:0043162	ubiquitin-dependent protein catabolic pr...	3	1.39	0.15225	0.78032486631016	2	0.49	0.0814	1	1	0.7	0.51635	0.963069614711033	0	0.3	1	1
GO:0043271	negative regulation of ion transport	11	7.65	0.13423	0.78032486631016	4	2.99	0.34999	1	5	3.64	0.2987	0.861801018600531	3	1.9	0.29439	1
GO:0043410	positive regulation of MAPK cascade	48	40.9	0.13077	0.78032486631016	13	15.37	0.77328	1	26	18.28	0.04319	0.424590923076923	10	8.76	0.37955	1
GO:0043508	negative regulation of JUN kinase activi...	3	1.39	0.15225	0.78032486631016	2	0.55	0.10055	1	1	0.63	0.47989	0.943680638297872	0	0.3	1	1
GO:0043525	positive regulation of neuron apoptotic ...	8	5.15	0.13296	0.78032486631016	2	2.01	0.60641	1	5	2.31	0.07742	0.537317342799189	1	1.21	0.71031	1
GO:0044033	multi-organism metabolic process	22	17.53	0.15195	0.78032486631016	14	6.65	0.00631	1	6	7.84	0.80546	1	1	3.64	0.97602	1
GO:0044259	multicellular organismal macromolecule m...	18	13.77	0.13924	0.78032486631016	5	4.82	0.53228	1	11	6.16	0.04274	0.423721395348837	3	2.81	0.53632	1
GO:0044340	canonical Wnt signaling pathway involved...	2	0.7	0.14504	0.78032486631016	NA	NA	NA	NA	1	0.35	0.30449	0.861801018600531	NA	NA	NA	NA
GO:0044702	single organism reproductive process	113	103.07	0.15084	0.78032486631016	33	38.3	0.84134	1	54	45.1	0.09254	0.575530924855491	27	21.72	0.14084	1
GO:0045019	negative regulation of nitric oxide bios...	3	1.39	0.15225	0.78032486631016	1	0.55	0.43254	1	0	0.42	1	1	1	0.27	0.2371	1
GO:0045347	negative regulation of MHC class II bios...	2	0.7	0.14504	0.78032486631016	1	0.3	0.27	1	NA	NA	NA	NA	NA	NA	NA	NA
GO:0045409	negative regulation of interleukin-6 bio...	2	0.7	0.14504	0.78032486631016	1	0.3	0.27	1	NA	NA	NA	NA	NA	NA	NA	NA
GO:0045761	regulation of adenylate cyclase activity	11	7.65	0.13423	0.78032486631016	7	2.99	0.02797	1	5	3.57	0.2848	0.861801018600531	1	1.93	0.86147	1
GO:0045786	negative regulation of cell cycle	47	40.2	0.13974	0.78032486631016	21	15	0.07402	1	21	18.91	0.34007	0.874768965517241	8	9.1	0.69543	1
GO:0045860	positive regulation of protein kinase ac...	60	52.44	0.14325	0.78032486631016	23	19.46	0.22973	1	30	24.02	0.12099	0.637799060297572	9	11.49	0.81816	1
GO:0045937	positive regulation of phosphate metabol...	105	94.73	0.13308	0.78032486631016	33	35.31	0.68641	1	52	42.72	0.07829	0.537317342799189	22	20.51	0.3976	1
GO:0045980	negative regulation of nucleotide metabo...	8	5.29	0.14909	0.78032486631016	5	2.2	0.06552	1	2	2.38	0.69891	1	2	1.29	0.37141	1
GO:0046128	purine ribonucleoside metabolic process	92	82.63	0.14059	0.78032486631016	29	29.82	0.59184	1	45	38.24	0.14088	0.682837811320755	20	18.24	0.36668	1
GO:0046325	negative regulation of glucose import	3	1.39	0.15225	0.78032486631016	2	0.55	0.10055	1	1	0.7	0.51635	0.963069614711033	0	0.34	1	1
GO:0046330	positive regulation of JNK cascade	10	6.96	0.14868	0.78032486631016	4	2.01	0.13906	1	5	3.22	0.21764	0.791530791121229	1	1.25	0.72133	1
GO:0046390	ribose phosphate biosynthetic process	31	25.59	0.14648	0.78032486631016	12	9.45	0.23643	1	14	11.56	0.26584	0.861801018600531	8	5.72	0.21433	1
GO:0046546	development of primary male sexual chara...	20	15.72	0.15091	0.78032486631016	7	5.98	0.38975	1	10	6.72	0.13377	0.655011724137931	3	3.3	0.64653	1
GO:0046649	lymphocyte activation	67	58.84	0.13713	0.78032486631016	17	22.02	0.89541	1	30	25.49	0.19854	0.761446924428822	20	12.43	0.02437	1
GO:0046685	response to arsenic-containing substance	4	2.09	0.14497	0.78032486631016	2	0.91	0.23178	1	2	0.98	0.2566	0.846065015479876	0	0.53	1	1
GO:0046717	acid secretion	14	10.15	0.12978	0.78032486631016	6	4.09	0.22325	1	7	4.55	0.16805	0.723270805369127	2	2.43	0.70422	1
GO:0046777	protein autophosphorylation	28	22.95	0.15152	0.78032486631016	6	8.6	0.86762	1	18	10.57	0.01833	0.298037404580153	6	5.12	0.40523	1
GO:0046847	filopodium assembly	10	6.82	0.13475	0.78032486631016	2	2.26	0.66888	1	7	3.15	0.03548	0.405426962457338	1	1.33	0.74213	1
GO:0048340	paraxial mesoderm morphogenesis	3	1.39	0.15225	0.78032486631016	0	0.61	1	1	2	0.7	0.15178	0.692272805139186	1	0.38	0.3207	1
GO:0048518	positive regulation of biological proces...	480	460.43	0.12981	0.78032486631016	167	172.17	0.69937	1	233	207.3	0.01654	0.285170744680851	87	99.78	0.94787	1
GO:0048522	positive regulation of cellular process	430	410.91	0.12723	0.78032486631016	149	154.18	0.70592	1	211	186.08	0.01646	0.285039024390244	75	89.62	0.97272	1
GO:0048592	eye morphogenesis	22	17.39	0.1432	0.78032486631016	5	6.77	0.81518	1	11	8.12	0.18835	0.7522228125	6	3.98	0.20777	1
GO:0048661	positive regulation of smooth muscle cel...	8	5.29	0.14909	0.78032486631016	1	2.2	0.89664	1	6	2.38	0.02882	0.364672871287129	1	1.25	0.72133	1
GO:0048669	collateral sprouting in absence of injur...	2	0.7	0.14504	0.78032486631016	NA	NA	NA	NA	2	0.35	0.04249	0.423710747663551	0	0.19	1	1
GO:0048821	erythrocyte development	5	2.78	0.13453	0.78032486631016	1	0.98	0.63492	1	3	1.26	0.12746	0.637799060297572	2	0.61	0.12134	1
GO:0048870	cell motility	138	126.58	0.13858	0.78032486631016	41	48.06	0.88119	1	72	57.08	0.02207	0.319789795918367	26	27.68	0.66214	1
GO:0050776	regulation of immune response	95	85.55	0.14237	0.78032486631016	30	32.32	0.69458	1	51	37.05	0.01174	0.24596262295082	18	17.86	0.52153	1
GO:0050868	negative regulation of T cell activation	11	7.79	0.14727	0.78032486631016	2	3.05	0.81806	1	5	3.22	0.21764	0.791530791121229	5	1.55	0.0186	1
GO:0050916	sensory perception of sweet taste	2	0.7	0.14504	0.78032486631016	1	0.3	0.27	1	1	0.35	0.30449	0.861801018600531	0	0.19	1	1
GO:0050999	regulation of nitric-oxide synthase acti...	7	4.31	0.12969	0.78032486631016	2	1.59	0.47665	1	5	1.89	0.03703	0.405426962457338	2	0.99	0.2588	1
GO:0051054	positive regulation of DNA metabolic pro...	17	12.8	0.13268	0.78032486631016	5	4.94	0.55486	1	9	5.74	0.11871	0.632657964970809	3	2.88	0.55451	1
GO:0051124	synaptic growth at neuromuscular junctio...	2	0.7	0.14504	0.78032486631016	NA	NA	NA	NA	2	0.35	0.04249	0.423710747663551	NA	NA	NA	NA
GO:0051281	positive regulation of release of seques...	4	2.09	0.14497	0.78032486631016	1	0.85	0.58588	1	3	0.77	0.03694	0.405426962457338	0	0.42	1	1
GO:0051354	negative regulation of oxidoreductase ac...	4	2.09	0.14497	0.78032486631016	0	0.73	1	1	2	0.91	0.22991	0.807253669222344	1	0.42	0.34648	1
GO:0051489	regulation of filopodium assembly	7	4.45	0.14723	0.78032486631016	1	1.46	0.77955	1	4	2.1	0.1549	0.696069620253165	1	0.87	0.58936	1
GO:0051495	positive regulation of cytoskeleton orga...	21	16.27	0.1297	0.78032486631016	6	6.1	0.57641	1	11	7.91	0.16701	0.723270805369127	6	3.83	0.18431	1
GO:0051649	establishment of localization in cell	250	234.66	0.13024	0.78032486631016	96	88.25	0.19365	1	115	105.68	0.16759	0.723270805369127	51	50.95	0.5213	1
GO:0051674	localization of cell	138	126.58	0.13858	0.78032486631016	41	48.06	0.88119	1	72	57.08	0.02207	0.319789795918367	26	27.68	0.66214	1
GO:0051785	positive regulation of nuclear division	8	5.29	0.14909	0.78032486631016	2	2.26	0.66888	1	3	2.38	0.42908	0.922374418604651	3	1.29	0.13682	1
GO:0055003	cardiac myofibril assembly	4	2.09	0.14497	0.78032486631016	1	0.79	0.55894	1	3	0.98	0.06975	0.511713547646384	0	0.45	1	1
GO:0055082	cellular chemical homeostasis	68	60.09	0.1473	0.78032486631016	22	22.81	0.60284	1	32	26.89	0.17286	0.729988043478261	17	13.16	0.1675	1
GO:0055129	L-proline biosynthetic process	2	0.7	0.14504	0.78032486631016	2	0.3	0.03283	1	0	0.35	1	1	0	0.19	1	1
GO:0060013	righting reflex	2	0.7	0.14504	0.78032486631016	NA	NA	NA	NA	2	0.35	0.04249	0.423710747663551	NA	NA	NA	NA
GO:0060028	convergent extension involved in axis el...	2	0.7	0.14504	0.78032486631016	1	0.3	0.27	1	1	0.35	0.30449	0.861801018600531	0	0.19	1	1
GO:0060231	mesenchymal to epithelial transition	4	2.09	0.14497	0.78032486631016	0	0.79	1	1	4	0.98	0.01355	0.263298795180723	0	0.45	1	1
GO:0060349	bone morphogenesis	14	10.15	0.12978	0.78032486631016	3	3.72	0.72791	1	8	4.9	0.11491	0.620164611486486	3	2.46	0.4497	1
GO:0060456	positive regulation of digestive system ...	3	1.39	0.15225	0.78032486631016	0	0.61	1	1	2	0.63	0.12709	0.637799060297572	1	0.34	0.2939	1
GO:0060479	lung cell differentiation	6	3.62	0.14292	0.78032486631016	3	1.46	0.17757	1	2	1.61	0.48587	0.943680638297872	1	0.83	0.57313	1
GO:0060491	regulation of cell projection assembly	13	9.46	0.14317	0.78032486631016	3	3.29	0.64814	1	7	4.41	0.14991	0.692272805139186	2	2.05	0.61279	1
GO:0060537	muscle tissue development	47	40.06	0.1343	0.78032486631016	13	15.61	0.79169	1	27	18.98	0.03988	0.423710747663551	9	9.4	0.60185	1
GO:0060573	cell fate specification involved in patt...	3	1.39	0.15225	0.78032486631016	1	0.49	0.39565	1	2	0.7	0.15178	0.692272805139186	0	0.34	1	1
GO:0060770	negative regulation of epithelial cell p...	2	0.7	0.14504	0.78032486631016	1	0.3	0.27	1	2	0.35	0.04249	0.423710747663551	0	0.19	1	1
GO:0060789	hair follicle placode formation	2	0.7	0.14504	0.78032486631016	NA	NA	NA	NA	1	0.35	0.30449	0.861801018600531	0	0.19	1	1
GO:0061312	BMP signaling pathway involved in heart ...	2	0.7	0.14504	0.78032486631016	1	0.3	0.27	1	NA	NA	NA	NA	1	0.19	0.17576	1
GO:0070059	intrinsic apoptotic signaling pathway in...	6	3.62	0.14292	0.78032486631016	3	1.34	0.14737	1	3	1.75	0.25356	0.846065015479876	0	0.83	1	1
GO:0070206	protein trimerization	7	4.31	0.12969	0.78032486631016	4	1.65	0.07891	1	2	1.82	0.55242	0.987402461538462	1	0.87	0.58936	1
GO:0070208	protein heterotrimerization	3	1.39	0.15225	0.78032486631016	2	0.61	0.12078	1	1	0.7	0.51635	0.963069614711033	0	0.38	1	1
GO:0070316	regulation of G0 to G1 transition	2	0.7	0.14504	0.78032486631016	NA	NA	NA	NA	2	0.35	0.04249	0.423710747663551	NA	NA	NA	NA
GO:0070535	histone H2A K63-linked ubiquitination	2	0.7	0.14504	0.78032486631016	NA	NA	NA	NA	2	0.35	0.04249	0.423710747663551	NA	NA	NA	NA
GO:0070934	CRD-mediated mRNA stabilization	2	0.7	0.14504	0.78032486631016	1	0.3	0.27	1	1	0.35	0.30449	0.861801018600531	0	0.19	1	1
GO:0071326	cellular response to monosaccharide stim...	12	8.49	0.13312	0.78032486631016	3	3.11	0.60924	1	7	4.06	0.10897	0.606021148825065	2	1.93	0.58146	1
GO:0071379	cellular response to prostaglandin stimu...	3	1.39	0.15225	0.78032486631016	1	0.55	0.43254	1	2	0.63	0.12709	0.637799060297572	0	0.34	1	1
GO:0071548	response to dexamethasone	3	1.39	0.15225	0.78032486631016	0	0.49	1	1	3	0.56	0.01468	0.271113294797688	0	0.3	1	1
GO:0071702	organic substance transport	254	239.53	0.14656	0.78032486631016	98	89.53	0.17294	1	116	106.59	0.16604	0.723270805369127	51	50.99	0.52363	1
GO:0071732	cellular response to nitric oxide	2	0.7	0.14504	0.78032486631016	1	0.3	0.27	1	NA	NA	NA	NA	NA	NA	NA	NA
GO:0072525	pyridine-containing compound biosyntheti...	5	2.78	0.13453	0.78032486631016	1	1.04	0.65722	1	2	1.19	0.33641	0.874768965517241	2	0.61	0.12134	1
GO:0086015	SA node cell action potential	2	0.7	0.14504	0.78032486631016	NA	NA	NA	NA	1	0.35	0.30449	0.861801018600531	NA	NA	NA	NA
GO:0086018	SA node cell to atrial cardiac muscle ce...	2	0.7	0.14504	0.78032486631016	NA	NA	NA	NA	1	0.35	0.30449	0.861801018600531	NA	NA	NA	NA
GO:0090092	regulation of transmembrane receptor pro...	26	20.87	0.13645	0.78032486631016	6	7.81	0.8008	1	14	9.8	0.11221	0.613800769888794	6	4.66	0.32354	1
GO:0090199	regulation of release of cytochrome c fr...	7	4.45	0.14723	0.78032486631016	3	1.52	0.19326	1	1	2.03	0.87858	1	3	0.91	0.06069	1
GO:0097048	dendritic cell apoptotic process	2	0.7	0.14504	0.78032486631016	0	0.3	1	1	NA	NA	NA	NA	NA	NA	NA	NA
GO:1900117	regulation of execution phase of apoptos...	4	2.09	0.14497	0.78032486631016	3	0.79	0.0408	1	0	0.84	1	1	1	0.45	0.37128	1
GO:1900372	negative regulation of purine nucleotide...	7	4.45	0.14723	0.78032486631016	5	1.83	0.03329	1	2	1.96	0.59329	1	1	1.06	0.6617	1
GO:1900746	regulation of vascular endothelial growt...	2	0.7	0.14504	0.78032486631016	NA	NA	NA	NA	NA	NA	NA	NA	NA	NA	NA	NA
GO:1901160	primary amino compound metabolic process	3	1.39	0.15225	0.78032486631016	0	0.61	1	1	1	0.63	0.47989	0.943680638297872	2	0.34	0.04325	1
GO:1901228	positive regulation of transcription fro...	2	0.7	0.14504	0.78032486631016	NA	NA	NA	NA	1	0.35	0.30449	0.861801018600531	NA	NA	NA	NA
GO:1901663	quinone biosynthetic process	3	1.39	0.15225	0.78032486631016	3	0.55	0.01437	1	0	0.56	1	1	0	0.3	1	1
GO:1901796	regulation of signal transduction by p53...	7	4.31	0.12969	0.78032486631016	3	1.59	0.20928	1	1	1.75	0.83754	1	3	0.95	0.0671	1
GO:1901841	regulation of high voltage-gated calcium...	2	0.7	0.14504	0.78032486631016	1	0.3	0.27	1	NA	NA	NA	NA	0	0.19	1	1
GO:1902254	negative regulation of intrinsic apoptot...	3	1.39	0.15225	0.78032486631016	1	0.49	0.39565	1	0	0.63	1	1	2	0.3	0.03449	1
GO:1902547	regulation of cellular response to vascu...	2	0.7	0.14504	0.78032486631016	NA	NA	NA	NA	NA	NA	NA	NA	NA	NA	NA	NA
GO:1902578	single-organism localization	50	42.98	0.13939	0.78032486631016	21	17.02	0.18599	1	25	19.75	0.13179	0.649797916666667	6	9.89	0.9353	1
GO:1902580	single-organism cellular localization	50	42.98	0.13939	0.78032486631016	21	17.02	0.18599	1	25	19.75	0.13179	0.649797916666667	6	9.89	0.9353	1
GO:2000051	negative regulation of non-canonical Wnt...	2	0.7	0.14504	0.78032486631016	1	0.3	0.27	1	1	0.35	0.30449	0.861801018600531	0	0.19	1	1
GO:2000108	positive regulation of leukocyte apoptot...	5	2.78	0.13453	0.78032486631016	1	0.98	0.63492	1	4	1.19	0.02727	0.358179754601227	1	0.61	0.46147	1
GO:2000668	regulation of dendritic cell apoptotic p...	2	0.7	0.14504	0.78032486631016	0	0.3	1	1	NA	NA	NA	NA	NA	NA	NA	NA
GO:2000765	regulation of cytoplasmic translation	2	0.7	0.14504	0.78032486631016	NA	NA	NA	NA	1	0.35	0.30449	0.861801018600531	NA	NA	NA	NA
GO:2000779	regulation of double-strand break repair	5	2.78	0.13453	0.78032486631016	3	1.04	0.0811	1	2	1.26	0.36253	0.886215263963275	0	0.61	1	1
GO:2001022	positive regulation of response to DNA d...	10	6.82	0.13475	0.78032486631016	3	2.5	0.46059	1	3	3.15	0.61929	1	4	1.59	0.07355	1
GO:2001234	negative regulation of apoptotic signali...	23	18.36	0.14789	0.78032486631016	8	7.26	0.44098	1	6	8.4	0.85411	1	9	4.25	0.02612	1
GO:2001236	regulation of extrinsic apoptotic signal...	23	18.08	0.1314	0.78032486631016	6	6.89	0.69451	1	11	8.4	0.21862	0.792838706015891	7	3.98	0.10339	1
GO:0032526	response to retinoic acid	17	13.08	0.15268	0.781931389312977	2	5.06	0.96606	1	11	5.53	0.02118	0.314014385150812	4	2.73	0.29097	1
GO:0001964	startle response	5	2.92	0.1575	0.789736547085202	1	1.16	0.69783	1	3	1.47	0.17867	0.729988043478261	1	0.72	0.52053	1
GO:0002431	Fc receptor mediated stimulatory signali...	13	9.6	0.15527	0.789736547085202	2	3.84	0.90408	1	9	4.41	0.0304	0.37646511627907	2	2.24	0.66096	1
GO:0006658	phosphatidylserine metabolic process	5	2.92	0.1575	0.789736547085202	3	1.1	0.0931	1	2	1.12	0.30998	0.863834365460096	0	0.49	1	1
GO:0006766	vitamin metabolic process	19	14.88	0.15493	0.789736547085202	5	5.79	0.69572	1	7	6.09	0.40911	0.915545738045738	6	3.07	0.08635	1
GO:0007019	microtubule depolymerization	5	2.92	0.1575	0.789736547085202	1	1.22	0.71629	1	3	1.47	0.17867	0.729988043478261	1	0.76	0.53875	1
GO:0008630	intrinsic apoptotic signaling pathway in...	16	12.24	0.15645	0.789736547085202	7	4.64	0.18005	1	7	5.67	0.33902	0.874768965517241	2	2.81	0.77698	1
GO:0009617	response to bacterium	51	44.37	0.1574	0.789736547085202	17	16.28	0.46337	1	24	17.23	0.06143	0.487624472049689	9	8.15	0.4291	1
GO:0010563	negative regulation of phosphorus metabo...	46	39.64	0.15513	0.789736547085202	21	15	0.07402	1	22	18.35	0.21575	0.786896404109589	7	9.02	0.80419	1
GO:0010573	vascular endothelial growth factor produ...	5	2.92	0.1575	0.789736547085202	0	1.22	1	1	4	1.26	0.03317	0.389625551470588	1	0.68	0.5016	1
GO:0010799	regulation of peptidyl-threonine phospho...	5	2.92	0.1575	0.789736547085202	0	1.28	1	1	5	1.19	0.00506	0.161015346534653	2	0.64	0.13422	1
GO:0030817	regulation of cAMP biosynthetic process	16	12.24	0.15645	0.789736547085202	10	4.7	0.01804	1	5	5.46	0.64586	1	2	2.81	0.77698	1
GO:0032350	regulation of hormone metabolic process	5	2.92	0.1575	0.789736547085202	2	1.1	0.30121	1	3	1.4	0.16101	0.708529181004818	0	0.64	1	1
GO:0044062	regulation of excretion	5	2.92	0.1575	0.789736547085202	2	1.16	0.32421	1	3	1.26	0.12746	0.637799060297572	1	0.61	0.46147	1
GO:0045936	negative regulation of phosphate metabol...	46	39.64	0.15513	0.789736547085202	21	15	0.07402	1	22	18.35	0.21575	0.786896404109589	7	9.02	0.80419	1
GO:0048871	multicellular organismal homeostasis	34	28.52	0.15507	0.789736547085202	12	10.49	0.35754	1	13	12.4	0.47115	0.943680638297872	8	6.03	0.25597	1
GO:0050850	positive regulation of calcium-mediated ...	5	2.92	0.1575	0.789736547085202	1	1.1	0.67816	1	2	1.12	0.30998	0.863834365460096	2	0.57	0.10879	1
GO:0051491	positive regulation of filopodium assemb...	5	2.92	0.1575	0.789736547085202	1	0.85	0.58588	1	3	1.4	0.16101	0.708529181004818	0	0.53	1	1
GO:0060119	inner ear receptor cell development	5	2.92	0.1575	0.789736547085202	3	0.98	0.06983	1	3	1.19	0.11175	0.612946351931331	1	0.53	0.41811	1
GO:0060306	regulation of membrane repolarization	5	2.92	0.1575	0.789736547085202	1	1.04	0.65722	1	4	1.33	0.03976	0.423444	1	0.61	0.46147	1
GO:0060541	respiratory system development	29	23.93	0.15491	0.789736547085202	8	8.9	0.67365	1	18	11.28	0.03257	0.389625551470588	3	5.54	0.91953	1
GO:0060765	regulation of androgen receptor signalin...	5	2.92	0.1575	0.789736547085202	2	1.04	0.27809	1	1	1.4	0.76625	1	2	0.72	0.16081	1
GO:0060914	heart formation	5	2.92	0.1575	0.789736547085202	1	1.1	0.67816	1	3	1.4	0.16101	0.708529181004818	1	0.72	0.52053	1
GO:0086091	regulation of heart rate by cardiac cond...	5	2.92	0.1575	0.789736547085202	1	1.04	0.65722	1	4	1.47	0.055	0.484588279301746	1	0.64	0.48192	1
GO:0090101	negative regulation of transmembrane rec...	16	12.24	0.15645	0.789736547085202	3	4.51	0.83765	1	10	5.67	0.05561	0.484588279301746	3	2.62	0.4891	1
GO:0090200	positive regulation of release of cytoch...	5	2.92	0.1575	0.789736547085202	3	0.98	0.06983	1	1	1.4	0.76625	1	1	0.61	0.46147	1
GO:0097194	execution phase of apoptosis	16	12.24	0.15645	0.789736547085202	8	4.39	0.07083	1	3	5.25	0.90421	1	6	2.5	0.03836	1
GO:1901685	glutathione derivative metabolic process	5	2.92	0.1575	0.789736547085202	1	0.98	0.63492	1	3	1.12	0.09684	0.579950890346767	0	0.53	1	1
GO:1901687	glutathione derivative biosynthetic proc...	5	2.92	0.1575	0.789736547085202	1	0.98	0.63492	1	3	1.12	0.09684	0.579950890346767	0	0.53	1	1
GO:0016265	death	231	217.69	0.1577	0.790148842419716	84	81.6	0.40314	1	100	99.03	0.47419	0.943680638297872	49	47.69	0.44203	1
GO:0048144	fibroblast proliferation	12	8.76	0.15822	0.792162671641791	6	3.42	0.12438	1	4	4.06	0.58652	1	2	2.09	0.62283	1
GO:0009790	embryo development	128	117.82	0.15921	0.796524899328859	42	44.34	0.67033	1	74	55.61	0.00616	0.176513004484305	16	26.96	0.99371	1
GO:0009144	purine nucleoside triphosphate metabolic...	84	75.67	0.16025	0.801130588673621	28	27.2	0.46516	1	41	35.09	0.16514	0.720303481228669	18	16.64	0.39999	1
GO:0006637	acyl-CoA metabolic process	11	7.93	0.16094	0.802189049034175	3	2.81	0.53832	1	7	3.64	0.06899	0.511713547646384	2	1.74	0.52522	1
GO:0035383	thioester metabolic process	11	7.93	0.16094	0.802189049034175	3	2.81	0.53832	1	7	3.64	0.06899	0.511713547646384	2	1.74	0.52522	1
GO:0060359	response to ammonium ion	11	7.93	0.16094	0.802189049034175	2	2.87	0.7902	1	7	3.64	0.06899	0.511713547646384	3	1.71	0.24259	1
GO:2000106	regulation of leukocyte apoptotic proces...	11	7.93	0.16094	0.802189049034175	2	2.87	0.7902	1	6	3.57	0.14428	0.688021791044776	3	1.74	0.25285	1
GO:1901068	guanosine-containing compound metabolic ...	63	55.78	0.16173	0.805528262806236	19	20.13	0.63778	1	33	25.77	0.08427	0.543375681130172	13	12.28	0.45754	1
GO:0001708	cell fate specification	14	10.57	0.16408	0.805856167751265	4	4.09	0.59043	1	8	4.97	0.12205	0.637799060297572	2	2.5	0.72019	1
GO:0001910	regulation of leukocyte mediated cytotox...	8	5.42	0.16612	0.805856167751265	3	2.01	0.32674	1	6	2.17	0.01883	0.302320854271357	1	1.02	0.64833	1
GO:0001914	regulation of T cell mediated cytotoxici...	6	3.76	0.16344	0.805856167751265	3	1.34	0.14737	1	5	1.4	0.01065	0.237120209059233	0	0.64	1	1
GO:0002260	lymphocyte homeostasis	9	6.26	0.16513	0.805856167751265	1	2.44	0.91972	1	7	3.15	0.03548	0.405426962457338	2	1.55	0.46412	1
GO:0002548	monocyte chemotaxis	6	3.76	0.16344	0.805856167751265	2	1.46	0.43506	1	3	1.61	0.21542	0.786590742857143	1	0.8	0.55627	1
GO:0006730	one-carbon metabolic process	6	3.76	0.16344	0.805856167751265	5	1.4	0.01115	1	2	1.61	0.48587	0.943680638297872	0	0.76	1	1
GO:0006739	NADP metabolic process	6	3.76	0.16344	0.805856167751265	3	1.28	0.13296	1	3	1.68	0.23435	0.813414720260728	0	0.8	1	1
GO:0006749	glutathione metabolic process	7	4.59	0.16582	0.805856167751265	3	1.4	0.16226	1	3	1.89	0.29254	0.861801018600531	0	0.83	1	1
GO:0006754	ATP biosynthetic process	6	3.76	0.16344	0.805856167751265	1	1.34	0.74991	1	3	1.89	0.29254	0.861801018600531	3	0.91	0.06069	1
GO:0006809	nitric oxide biosynthetic process	9	6.26	0.16513	0.805856167751265	2	2.38	0.69698	1	5	2.59	0.11362	0.615803053435115	2	1.4	0.41205	1
GO:0006897	endocytosis	61	53.97	0.16477	0.805856167751265	11	20.55	0.99402	1	39	24.51	0.00255	0.11315625	12	11.9	0.53123	1
GO:0007517	muscle organ development	48	41.73	0.16443	0.805856167751265	12	15.92	0.87991	1	27	19.61	0.0558	0.484588279301746	11	9.59	0.36419	1
GO:0008344	adult locomotory behavior	14	10.57	0.16408	0.805856167751265	5	3.9	0.35151	1	8	5.11	0.13702	0.666837623762376	3	2.46	0.4497	1
GO:0009205	purine ribonucleoside triphosphate metab...	83	74.84	0.16403	0.805856167751265	27	26.9	0.52131	1	41	34.67	0.14653	0.692272805139186	18	16.42	0.37729	1
GO:0010171	body morphogenesis	8	5.42	0.16612	0.805856167751265	0	2.2	1	1	7	2.73	0.01724	0.288623255813953	1	1.4	0.76139	1
GO:0030800	negative regulation of cyclic nucleotide...	7	4.59	0.16582	0.805856167751265	4	1.89	0.11732	1	2	2.03	0.61265	1	2	1.1	0.30147	1
GO:0032104	regulation of response to extracellular ...	7	4.59	0.16582	0.805856167751265	3	1.95	0.30968	1	1	2.17	0.89504	1	3	1.18	0.11141	1
GO:0032107	regulation of response to nutrient level...	7	4.59	0.16582	0.805856167751265	3	1.95	0.30968	1	1	2.17	0.89504	1	3	1.18	0.11141	1
GO:0032233	positive regulation of actin filament bu...	7	4.59	0.16582	0.805856167751265	1	1.65	0.81756	1	4	2.24	0.18282	0.739379620253165	2	1.06	0.28727	1
GO:0032272	negative regulation of protein polymeriz...	8	5.42	0.16612	0.805856167751265	3	2.13	0.36082	1	5	2.45	0.09464	0.577051145038168	1	1.29	0.73193	1
GO:0032330	regulation of chondrocyte differentiatio...	8	5.42	0.16612	0.805856167751265	2	2.07	0.62282	1	5	2.52	0.10391	0.587077718832891	1	1.33	0.74213	1
GO:0032984	macromolecular complex disassembly	25	20.45	0.16493	0.805856167751265	13	8.54	0.08509	1	10	9.38	0.46518	0.943680638297872	3	4.97	0.87919	1
GO:0034333	adherens junction assembly	10	7.09	0.16331	0.805856167751265	2	2.68	0.75865	1	6	3.43	0.12555	0.637799060297572	4	1.67	0.0842	1
GO:0042462	eye photoreceptor cell development	6	3.76	0.16344	0.805856167751265	1	1.34	0.74991	1	3	1.75	0.25356	0.846065015479876	2	0.76	0.17443	1
GO:0043624	cellular protein complex disassembly	21	16.83	0.16556	0.805856167751265	11	7.01	0.09154	1	8	7.84	0.53	0.978816733987305	3	4.09	0.78279	1
GO:0044253	positive regulation of multicellular org...	6	3.76	0.16344	0.805856167751265	1	1.34	0.74991	1	4	1.75	0.09349	0.575530924855491	0	0.87	1	1
GO:0044262	cellular carbohydrate metabolic process	35	29.63	0.16473	0.805856167751265	14	11.1	0.22058	1	12	13.1	0.66608	1	11	6.56	0.06447	1
GO:0045471	response to ethanol	17	13.21	0.16326	0.805856167751265	7	4.76	0.19699	1	7	6.02	0.3974	0.896399366420275	6	2.88	0.06779	1
GO:0046323	glucose import	9	6.26	0.16513	0.805856167751265	3	2.62	0.49241	1	5	2.87	0.15647	0.698259217877095	2	1.55	0.46412	1
GO:0050900	leukocyte migration	41	35.19	0.16446	0.805856167751265	14	13.17	0.44675	1	16	15.06	0.43791	0.922374418604651	9	7.28	0.3049	1
GO:0051148	negative regulation of muscle cell diffe...	7	4.59	0.16582	0.805856167751265	2	1.89	0.57198	1	3	2.17	0.37114	0.896399366420275	2	1.1	0.30147	1
GO:0051186	cofactor metabolic process	34	28.65	0.16217	0.805856167751265	16	10.31	0.05284	1	14	12.47	0.36566	0.892500916730328	5	5.99	0.72112	1
GO:0061035	regulation of cartilage development	10	7.09	0.16331	0.805856167751265	3	2.68	0.50797	1	6	3.36	0.11665	0.623238712374582	1	1.71	0.8251	1
GO:0071277	cellular response to calcium ion	6	3.76	0.16344	0.805856167751265	2	1.46	0.43506	1	3	1.75	0.25356	0.846065015479876	2	0.87	0.21624	1
GO:0071356	cellular response to tumor necrosis fact...	14	10.57	0.16408	0.805856167751265	6	3.9	0.19398	1	7	4.55	0.16805	0.723270805369127	2	2.27	0.67	1
GO:0097191	extrinsic apoptotic signaling pathway	30	25.04	0.16584	0.805856167751265	8	9.7	0.76172	1	15	11.49	0.17424	0.729988043478261	8	5.5	0.18498	1
GO:0051249	regulation of lymphocyte activation	42	36.17	0.16642	0.806728164739885	11	13.23	0.77905	1	19	15.41	0.20092	0.761446924428822	12	7.28	0.06116	1
GO:0042326	negative regulation of phosphorylation	39	33.38	0.16699	0.808906794223827	17	12.56	0.12542	1	20	15.48	0.14254	0.686900904977376	5	7.58	0.8814	1
GO:0007272	ensheathment of neurons	16	12.38	0.16758	0.809427084233261	6	5	0.38414	1	7	5.67	0.33902	0.874768965517241	3	2.96	0.57226	1
GO:0008366	axon ensheathment	16	12.38	0.16758	0.809427084233261	6	5	0.38414	1	7	5.67	0.33902	0.874768965517241	3	2.96	0.57226	1
GO:0034612	response to tumor necrosis factor	16	12.38	0.16758	0.809427084233261	7	4.51	0.16376	1	8	5.32	0.16111	0.708529181004818	2	2.62	0.74279	1
GO:0045834	positive regulation of lipid metabolic p...	16	12.38	0.16758	0.809427084233261	2	4.64	0.95088	1	13	5.6	0.00349	0.128908092485549	3	2.84	0.54547	1
GO:0007416	synapse assembly	13	9.74	0.16788	0.810292748201439	3	3.54	0.69561	1	9	4.69	0.04298	0.424027777777778	0	2.12	1	1
GO:0006022	aminoglycan metabolic process	26	21.42	0.16874	0.813074931801866	12	7.99	0.1029	1	10	9.52	0.48422	0.943680638297872	5	4.47	0.46516	1
GO:0030324	lung development	26	21.42	0.16874	0.813074931801866	7	8.05	0.7022	1	16	10.01	0.04192	0.423710747663551	3	4.97	0.87919	1
GO:0050804	regulation of synaptic transmission	31	26.01	0.16882	0.813074931801866	7	9.58	0.85108	1	20	12.4	0.02279	0.326504697986577	7	5.91	0.37945	1
GO:0051168	nuclear export	18	14.19	0.16949	0.815131476702509	9	5.18	0.07349	1	7	6.23	0.43248	0.922374418604651	2	3	0.80714	1
GO:0071407	cellular response to organic cyclic comp...	34	28.79	0.16945	0.815131476702509	9	10.73	0.75405	1	18	12.61	0.07969	0.537317342799189	10	6.56	0.12145	1
GO:0002274	myeloid leukocyte activation	20	16	0.17029	0.816973009292352	7	6.16	0.42021	1	13	7.07	0.0236	0.332900662251656	1	3.49	0.97196	1
GO:0003018	vascular process in circulatory system	22	17.81	0.17031	0.816973009292352	7	6.89	0.53904	1	10	8.26	0.31247	0.863907003891051	5	4.17	0.40517	1
GO:0009636	response to toxic substance	20	16	0.17029	0.816973009292352	8	6.28	0.29172	1	8	6.93	0.39081	0.896399366420275	6	3.6	0.15128	1
GO:0043068	positive regulation of programmed cell d...	52	45.63	0.17036	0.816973009292352	16	17.56	0.68793	1	29	20.59	0.03817	0.412701015228426	8	10.27	0.81277	1
GO:0001816	cytokine production	67	59.81	0.17081	0.818545921428571	26	22.99	0.28411	1	24	25.14	0.62568	1	17	12.17	0.10253	1
GO:0001909	leukocyte mediated cytotoxicity	12	8.9	0.17162	0.819463187588152	4	3.35	0.43425	1	9	3.43	0.00628	0.177562831858407	1	1.63	0.81097	1
GO:0008219	cell death	230	217.42	0.17141	0.819463187588152	83	81.48	0.44509	1	100	98.96	0.47105	0.943680638297872	49	47.65	0.43964	1
GO:0010882	regulation of cardiac muscle contraction...	4	2.23	0.1732	0.819463187588152	1	0.98	0.63492	1	3	0.98	0.06975	0.511713547646384	1	0.61	0.46147	1
GO:0015800	acidic amino acid transport	4	2.23	0.1732	0.819463187588152	1	0.91	0.61117	1	2	1.12	0.30998	0.863834365460096	1	0.61	0.46147	1
GO:0017015	regulation of transforming growth factor...	15	11.55	0.17198	0.819463187588152	2	4.57	0.94824	1	9	5.46	0.09396	0.57675734870317	4	2.73	0.29097	1
GO:0030316	osteoclast differentiation	12	8.9	0.17162	0.819463187588152	5	3.48	0.26656	1	5	3.5	0.27102	0.861801018600531	2	1.71	0.51338	1
GO:0035987	endodermal cell differentiation	4	2.23	0.1732	0.819463187588152	1	0.91	0.61117	1	2	0.91	0.22991	0.807253669222344	1	0.49	0.39515	1
GO:0043011	myeloid dendritic cell differentiation	4	2.23	0.1732	0.819463187588152	2	0.85	0.20879	1	2	1.12	0.30998	0.863834365460096	0	0.53	1	1
GO:0044703	multi-organism reproductive process	98	89.44	0.17215	0.819463187588152	29	33.24	0.80704	1	44	38.45	0.19106	0.760195143212951	25	18.65	0.08199	1
GO:0045649	regulation of macrophage differentiation	4	2.23	0.1732	0.819463187588152	2	0.85	0.20879	1	1	1.05	0.66374	1	1	0.49	0.39515	1
GO:0048070	regulation of developmental pigmentation	4	2.23	0.1732	0.819463187588152	2	0.91	0.23178	1	2	0.98	0.2566	0.846065015479876	0	0.57	1	1
GO:0050913	sensory perception of bitter taste	4	2.23	0.1732	0.819463187588152	2	0.79	0.18605	1	2	0.63	0.12709	0.637799060297572	0	0.23	1	1
GO:0051052	regulation of DNA metabolic process	32	26.99	0.17166	0.819463187588152	15	10.49	0.10269	1	13	12.05	0.42937	0.922374418604651	4	6.03	0.85871	1
GO:0072330	monocarboxylic acid biosynthetic process	27	22.4	0.17231	0.819463187588152	8	7.99	0.55084	1	11	9.73	0.38222	0.896399366420275	8	4.63	0.09178	1
GO:0090150	establishment of protein localization to...	35	29.77	0.17195	0.819463187588152	18	11.83	0.04931	1	13	13.73	0.62223	1	6	6.94	0.69872	1
GO:1901797	negative regulation of signal transducti...	4	2.23	0.1732	0.819463187588152	2	0.79	0.18605	1	0	0.91	1	1	2	0.49	0.08488	1
GO:1901985	positive regulation of protein acetylati...	4	2.23	0.1732	0.819463187588152	0	0.85	1	1	4	1.05	0.01748	0.288623255813953	0	0.49	1	1
GO:2000758	positive regulation of peptidyl-lysine a...	4	2.23	0.1732	0.819463187588152	0	0.85	1	1	4	1.05	0.01748	0.288623255813953	0	0.49	1	1
GO:0001776	leukocyte homeostasis	11	8.07	0.17523	0.82441659887798	2	3.17	0.83474	1	8	3.92	0.04001	0.423710747663551	2	1.97	0.59211	1
GO:0001952	regulation of cell-matrix adhesion	11	8.07	0.17523	0.82441659887798	1	2.87	0.94842	1	7	3.57	0.06334	0.492865496368039	4	1.67	0.0842	1
GO:0009124	nucleoside monophosphate biosynthetic pr...	11	8.07	0.17523	0.82441659887798	2	2.99	0.80916	1	4	3.85	0.54377	0.987402461538462	6	1.86	0.01005	1
GO:0031330	negative regulation of cellular cataboli...	11	8.07	0.17523	0.82441659887798	2	3.17	0.83474	1	8	3.78	0.03308	0.389625551470588	1	1.9	0.85598	1
GO:0043903	regulation of symbiosis, encompassing mu...	23	18.78	0.17473	0.82441659887798	13	7.01	0.02264	1	8	8.12	0.57066	1	2	3.68	0.88779	1
GO:0048738	cardiac muscle tissue development	23	18.78	0.17473	0.82441659887798	7	7.32	0.60363	1	14	8.82	0.05723	0.484588279301746	2	4.32	0.93414	1
GO:0051341	regulation of oxidoreductase activity	11	8.07	0.17523	0.82441659887798	2	3.05	0.81806	1	7	3.5	0.05798	0.484588279301746	3	1.78	0.26316	1
GO:2000117	negative regulation of cysteine-type end...	11	8.07	0.17523	0.82441659887798	3	2.93	0.56757	1	6	3.64	0.15411	0.696069620253165	2	1.71	0.51338	1
GO:0006310	DNA recombination	28	23.37	0.17569	0.826001548703574	13	8.29	0.07123	1	7	9.8	0.86805	1	7	4.78	0.20139	1
GO:0034614	cellular response to reactive oxygen spe...	14	10.71	0.17646	0.827881216783217	4	4.03	0.57837	1	7	4.76	0.19695	0.761446924428822	2	2.27	0.67	1
GO:0051291	protein heterooligomerization	14	10.71	0.17646	0.827881216783217	5	4.09	0.3885	1	8	5.11	0.13702	0.666837623762376	2	2.43	0.70422	1
GO:2001237	negative regulation of extrinsic apoptot...	14	10.71	0.17646	0.827881216783217	2	4.27	0.9329	1	6	4.97	0.37887	0.896399366420275	6	2.5	0.03836	1
GO:0015711	organic anion transport	44	38.25	0.17659	0.827912166317261	15	14.33	0.46619	1	22	17.02	0.12868	0.638801552795031	11	8.3	0.20942	1
GO:0000187	activation of MAPK activity	19	15.3	0.18583	0.829605726762321	7	5.98	0.38975	1	10	7.07	0.16862	0.723270805369127	3	3.45	0.67646	1
GO:0001702	gastrulation with mouth forming second	6	3.89	0.18512	0.829605726762321	2	1.52	0.45609	1	3	1.89	0.29254	0.861801018600531	1	0.91	0.60496	1
GO:0001913	T cell mediated cytotoxicity	7	4.73	0.18539	0.829605726762321	3	1.71	0.2421	1	6	1.82	0.00793	0.20939132231405	0	0.83	1	1
GO:0001934	positive regulation of protein phosphory...	81	73.58	0.18621	0.829605726762321	25	27.81	0.74156	1	44	33.27	0.03354	0.39324880733945	15	16.11	0.6513	1
GO:0002227	innate immune response in mucosa	2	0.83	0.19818	0.829605726762321	0	0.3	1	1	NA	NA	NA	NA	NA	NA	NA	NA
GO:0002478	antigen processing and presentation of e...	24	19.75	0.17885	0.829605726762321	8	7.38	0.45971	1	10	9.66	0.5031	0.963069614711033	8	4.51	0.08218	1
GO:0002606	positive regulation of dendritic cell an...	2	0.83	0.19818	0.829605726762321	NA	NA	NA	NA	0	0.35	1	1	NA	NA	NA	NA
GO:0002883	regulation of hypersensitivity	2	0.83	0.19818	0.829605726762321	NA	NA	NA	NA	NA	NA	NA	NA	NA	NA	NA	NA
GO:0003016	respiratory system process	5	3.06	0.18194	0.829605726762321	4	1.28	0.03577	1	1	1.47	0.78265	1	0	0.76	1	1
GO:0003093	regulation of glomerular filtration	3	1.53	0.1888	0.829605726762321	2	0.61	0.12078	1	1	0.77	0.55025	0.987402461538462	0	0.38	1	1
GO:0003284	septum primum development	2	0.83	0.19818	0.829605726762321	1	0.3	0.27	1	1	0.42	0.35322	0.874768965517241	0	0.19	1	1
GO:0003299	muscle hypertrophy in response to stress	3	1.53	0.1888	0.829605726762321	0	0.49	1	1	3	0.77	0.03694	0.405426962457338	0	0.42	1	1
GO:0003337	mesenchymal to epithelial transition inv...	3	1.53	0.1888	0.829605726762321	0	0.67	1	1	3	0.7	0.02831	0.3618018	0	0.38	1	1
GO:0003348	cardiac endothelial cell differentiation	2	0.83	0.19818	0.829605726762321	0	0.3	1	1	1	0.42	0.35322	0.874768965517241	1	0.19	0.17576	1
GO:0003417	growth plate cartilage development	3	1.53	0.1888	0.829605726762321	3	0.49	0.01003	1	0	0.77	1	1	0	0.34	1	1
GO:0005978	glycogen biosynthetic process	8	5.56	0.18399	0.829605726762321	5	2.13	0.05925	1	1	2.38	0.91564	1	2	1.21	0.3437	1
GO:0005979	regulation of glycogen biosynthetic proc...	5	3.06	0.18194	0.829605726762321	3	1.16	0.10577	1	1	1.4	0.76625	1	1	0.72	0.52053	1
GO:0006002	fructose 6-phosphate metabolic process	2	0.83	0.19818	0.829605726762321	NA	NA	NA	NA	0	0.35	1	1	NA	NA	NA	NA
GO:0007519	skeletal muscle tissue development	25	20.87	0.19196	0.829605726762321	6	7.99	0.81819	1	15	9.8	0.0651	0.50058844765343	6	4.85	0.35744	1
GO:0007586	digestion	19	15.44	0.19677	0.829605726762321	5	5.98	0.72154	1	7	5.95	0.38568	0.896399366420275	4	2.88	0.32549	1
GO:0008635	activation of cysteine-type endopeptidas...	2	0.83	0.19818	0.829605726762321	1	0.37	0.31454	1	0	0.35	1	1	1	0.19	0.17576	1
GO:0009071	serine family amino acid catabolic proce...	3	1.53	0.1888	0.829605726762321	0	0.49	1	1	3	0.7	0.02831	0.3618018	0	0.27	1	1
GO:0009116	nucleoside metabolic process	99	90.83	0.18553	0.829605726762321	31	32.93	0.66658	1	48	41.53	0.16094	0.708529181004818	22	19.79	0.3334	1
GO:0009120	deoxyribonucleoside metabolic process	2	0.83	0.19818	0.829605726762321	NA	NA	NA	NA	1	0.42	0.35322	0.874768965517241	NA	NA	NA	NA
GO:0009199	ribonucleoside triphosphate metabolic pr...	83	75.39	0.18254	0.829605726762321	27	27.08	0.53609	1	41	34.95	0.15879	0.706904874651811	18	16.53	0.38862	1
GO:0009250	glucan biosynthetic process	8	5.56	0.18399	0.829605726762321	5	2.13	0.05925	1	1	2.38	0.91564	1	2	1.21	0.3437	1
GO:0009304	tRNA transcription	2	0.83	0.19818	0.829605726762321	1	0.3	0.27	1	1	0.42	0.35322	0.874768965517241	0	0.19	1	1
GO:0009746	response to hexose	19	15.44	0.19677	0.829605726762321	6	5.61	0.49371	1	11	6.93	0.08516	0.544717117117117	4	3.34	0.4294	1
GO:0009967	positive regulation of signal transducti...	128	118.65	0.18129	0.829605726762321	38	44.58	0.87373	1	64	53.3	0.06869	0.511713547646384	30	25.59	0.20366	1
GO:0010455	positive regulation of cell fate commitm...	2	0.83	0.19818	0.829605726762321	2	0.37	0.04727	1	NA	NA	NA	NA	NA	NA	NA	NA
GO:0010523	negative regulation of calcium ion trans...	2	0.83	0.19818	0.829605726762321	1	0.37	0.31454	1	1	0.42	0.35322	0.874768965517241	0	0.23	1	1
GO:0010524	positive regulation of calcium ion trans...	6	3.89	0.18512	0.829605726762321	2	1.59	0.47665	1	4	1.68	0.08291	0.537317342799189	0	0.87	1	1
GO:0010694	positive regulation of alkaline phosphat...	2	0.83	0.19818	0.829605726762321	NA	NA	NA	NA	1	0.42	0.35322	0.874768965517241	1	0.19	0.17576	1
GO:0010962	regulation of glucan biosynthetic proces...	5	3.06	0.18194	0.829605726762321	3	1.16	0.10577	1	1	1.4	0.76625	1	1	0.72	0.52053	1
GO:0014898	cardiac muscle hypertrophy in response t...	3	1.53	0.1888	0.829605726762321	0	0.49	1	1	3	0.77	0.03694	0.405426962457338	0	0.42	1	1
GO:0015698	inorganic anion transport	13	9.88	0.18099	0.829605726762321	3	3.6	0.70669	1	7	4.2	0.12456	0.637799060297572	4	1.93	0.12689	1
GO:0015884	folic acid transport	2	0.83	0.19818	0.829605726762321	0	0.37	1	1	NA	NA	NA	NA	NA	NA	NA	NA
GO:0016339	calcium-dependent cell-cell adhesion	5	3.06	0.18194	0.829605726762321	2	1.16	0.32421	1	3	1.47	0.17867	0.729988043478261	0	0.72	1	1
GO:0018105	peptidyl-serine phosphorylation	21	17.25	0.19561	0.829605726762321	6	6.28	0.60564	1	14	7.56	0.01822	0.297004591836735	2	3.6	0.88067	1
GO:0018206	peptidyl-methionine modification	2	0.83	0.19818	0.829605726762321	0	0.3	1	1	1	0.35	0.30449	0.861801018600531	1	0.19	0.17576	1
GO:0019068	virion assembly	3	1.53	0.1888	0.829605726762321	1	0.55	0.43254	1	1	0.77	0.55025	0.987402461538462	1	0.34	0.2939	1
GO:0019229	regulation of vasoconstriction	9	6.4	0.18161	0.829605726762321	3	2.56	0.47662	1	4	3.01	0.35529	0.876226592049402	2	1.52	0.45135	1
GO:0019695	choline metabolic process	2	0.83	0.19818	0.829605726762321	NA	NA	NA	NA	2	0.42	0.06082	0.484588279301746	NA	NA	NA	NA
GO:0019953	sexual reproduction	79	71.78	0.18996	0.829605726762321	23	26.59	0.79656	1	36	30.39	0.16281	0.714530151098901	20	14.52	0.09087	1
GO:0021549	cerebellum development	13	10.02	0.19457	0.829605726762321	4	3.78	0.52822	1	8	4.76	0.10132	0.586780035492458	1	2.2	0.89448	1
GO:0021610	facial nerve morphogenesis	2	0.83	0.19818	0.829605726762321	1	0.37	0.31454	1	0	0.42	1	1	1	0.23	0.20702	1
GO:0021826	substrate-independent telencephalic tang...	2	0.83	0.19818	0.829605726762321	0	0.3	1	1	2	0.42	0.06082	0.484588279301746	0	0.19	1	1
GO:0021843	substrate-independent telencephalic tang...	2	0.83	0.19818	0.829605726762321	0	0.3	1	1	2	0.42	0.06082	0.484588279301746	0	0.19	1	1
GO:0021936	regulation of cerebellar granule cell pr...	3	1.53	0.1888	0.829605726762321	0	0.67	1	1	1	0.63	0.47989	0.943680638297872	2	0.38	0.05273	1
GO:0022603	regulation of anatomical structure morph...	91	83.18	0.18667	0.829605726762321	24	31.17	0.93156	1	56	38.38	0.00252	0.112606993006993	15	18.5	0.83518	1
GO:0030201	heparan sulfate proteoglycan metabolic p...	5	3.06	0.18194	0.829605726762321	0	1.16	1	1	3	1.19	0.11175	0.612946351931331	2	0.61	0.12134	1
GO:0030323	respiratory tube development	26	21.84	0.19546	0.829605726762321	7	8.23	0.72413	1	16	10.22	0.04915	0.449954871060172	3	5.08	0.88847	1
GO:0030512	negative regulation of transforming grow...	11	8.21	0.19009	0.829605726762321	1	3.23	0.96471	1	7	3.78	0.08116	0.537317342799189	3	1.86	0.28395	1
GO:0030575	nuclear body organization	2	0.83	0.19818	0.829605726762321	0	0.3	1	1	2	0.42	0.06082	0.484588279301746	0	0.19	1	1
GO:0030833	regulation of actin filament polymerizat...	15	11.82	0.19667	0.829605726762321	6	4.76	0.33988	1	7	5.53	0.31596	0.869502325581395	4	2.96	0.34286	1
GO:0030853	negative regulation of granulocyte diffe...	2	0.83	0.19818	0.829605726762321	NA	NA	NA	NA	2	0.42	0.06082	0.484588279301746	NA	NA	NA	NA
GO:0030879	mammary gland development	21	17.25	0.19561	0.829605726762321	5	6.71	0.809	1	12	8.12	0.11189	0.613187907375643	5	4.13	0.3976	1
GO:0031223	auditory behavior	2	0.83	0.19818	0.829605726762321	0	0.3	1	1	2	0.42	0.06082	0.484588279301746	0	0.23	1	1
GO:0031272	regulation of pseudopodium assembly	3	1.53	0.1888	0.829605726762321	1	0.49	0.39565	1	0	0.63	1	1	1	0.3	0.26605	1
GO:0031645	negative regulation of neurological syst...	3	1.53	0.1888	0.829605726762321	2	0.61	0.12078	1	1	0.63	0.47989	0.943680638297872	0	0.3	1	1
GO:0031946	regulation of glucocorticoid biosyntheti...	2	0.83	0.19818	0.829605726762321	1	0.37	0.31454	1	1	0.42	0.35322	0.874768965517241	0	0.23	1	1
GO:0032088	negative regulation of NF-kappaB transcr...	10	7.37	0.19453	0.829605726762321	4	2.99	0.34999	1	5	3.36	0.24394	0.834909801821103	0	1.67	1	1
GO:0032103	positive regulation of response to exter...	26	21.7	0.18632	0.829605726762321	6	8.54	0.86323	1	12	9.31	0.22085	0.799111834654587	7	4.63	0.18044	1
GO:0032463	negative regulation of protein homooligo...	2	0.83	0.19818	0.829605726762321	1	0.37	0.31454	1	1	0.42	0.35322	0.874768965517241	0	0.23	1	1
GO:0032607	interferon-alpha production	3	1.53	0.1888	0.829605726762321	1	0.67	0.49971	1	2	0.56	0.10349	0.586780035492458	0	0.3	1	1
GO:0032647	regulation of interferon-alpha productio...	3	1.53	0.1888	0.829605726762321	1	0.67	0.49971	1	2	0.56	0.10349	0.586780035492458	0	0.3	1	1
GO:0032692	negative regulation of interleukin-1 pro...	3	1.53	0.1888	0.829605726762321	1	0.67	0.49971	1	1	0.63	0.47989	0.943680638297872	1	0.38	0.3207	1
GO:0033131	regulation of glucokinase activity	2	0.83	0.19818	0.829605726762321	NA	NA	NA	NA	0	0.42	1	1	NA	NA	NA	NA
GO:0034143	regulation of toll-like receptor 4 signa...	3	1.53	0.1888	0.829605726762321	0	0.55	1	1	2	0.7	0.15178	0.692272805139186	1	0.34	0.2939	1
GO:0034599	cellular response to oxidative stress	21	17.25	0.19561	0.829605726762321	6	6.71	0.66932	1	10	7.7	0.24072	0.831459891891892	4	3.83	0.53663	1
GO:0034616	response to laminar fluid shear stress	3	1.53	0.1888	0.829605726762321	0	0.67	1	1	3	0.7	0.02831	0.3618018	0	0.38	1	1
GO:0035065	regulation of histone acetylation	6	3.89	0.18512	0.829605726762321	1	1.34	0.74991	1	5	1.82	0.03195	0.388877142857143	0	0.87	1	1
GO:0035461	vitamin transmembrane transport	2	0.83	0.19818	0.829605726762321	0	0.3	1	1	2	0.42	0.06082	0.484588279301746	0	0.19	1	1
GO:0036035	osteoclast development	2	0.83	0.19818	0.829605726762321	0	0.3	1	1	1	0.35	0.30449	0.861801018600531	NA	NA	NA	NA
GO:0039529	RIG-I signaling pathway	3	1.53	0.1888	0.829605726762321	1	0.67	0.49971	1	1	0.7	0.51635	0.963069614711033	1	0.38	0.3207	1
GO:0042058	regulation of epidermal growth factor re...	11	8.21	0.19009	0.829605726762321	2	3.11	0.82658	1	6	3.64	0.15411	0.696069620253165	3	1.74	0.25285	1
GO:0042118	endothelial cell activation	2	0.83	0.19818	0.829605726762321	1	0.37	0.31454	1	1	0.42	0.35322	0.874768965517241	1	0.23	0.20702	1
GO:0042417	dopamine metabolic process	5	3.06	0.18194	0.829605726762321	1	1.16	0.69783	1	3	1.47	0.17867	0.729988043478261	2	0.76	0.17443	1
GO:0042476	odontogenesis	18	14.47	0.19141	0.829605726762321	8	5.55	0.19003	1	8	6.86	0.37994	0.896399366420275	2	3.3	0.84789	1
GO:0042481	regulation of odontogenesis	5	3.06	0.18194	0.829605726762321	2	1.22	0.347	1	2	1.4	0.4135	0.915545738045738	1	0.72	0.52053	1
GO:0042487	regulation of odontogenesis of dentin-co...	3	1.53	0.1888	0.829605726762321	2	0.61	0.12078	1	1	0.7	0.51635	0.963069614711033	0	0.38	1	1
GO:0042921	glucocorticoid receptor signaling pathwa...	2	0.83	0.19818	0.829605726762321	1	0.37	0.31454	1	1	0.42	0.35322	0.874768965517241	0	0.23	1	1
GO:0043244	regulation of protein complex disassembl...	11	8.21	0.19009	0.829605726762321	4	3.48	0.46176	1	5	3.92	0.35516	0.876226592049402	3	2.12	0.35728	1
GO:0043371	negative regulation of CD4-positive, alp...	2	0.83	0.19818	0.829605726762321	0	0.37	1	1	NA	NA	NA	NA	NA	NA	NA	NA
GO:0043651	linoleic acid metabolic process	3	1.53	0.1888	0.829605726762321	1	0.67	0.49971	1	2	0.7	0.15178	0.692272805139186	0	0.38	1	1
GO:0044236	multicellular organismal metabolic proce...	19	15.3	0.18583	0.829605726762321	5	5.31	0.61915	1	11	6.93	0.08516	0.544717117117117	3	3.15	0.61468	1
GO:0044403	symbiosis, encompassing mutualism throug...	92	83.88	0.17807	0.829605726762321	44	31.65	0.01584	1	35	37.89	0.71617	1	15	18.01	0.80455	1
GO:0044419	interspecies interaction between organis...	92	83.88	0.17807	0.829605726762321	44	31.65	0.01584	1	35	37.89	0.71617	1	15	18.01	0.80455	1
GO:0045069	regulation of viral genome replication	9	6.4	0.18161	0.829605726762321	5	2.44	0.09408	1	2	2.73	0.76862	1	1	1.29	0.73193	1
GO:0045087	innate immune response	103	94.45	0.17842	0.829605726762321	37	35.25	0.40304	1	51	40.13	0.0438	0.427398320610687	16	18.96	0.79471	1
GO:0045143	homologous chromosome segregation	2	0.83	0.19818	0.829605726762321	0	0.3	1	1	0	0.42	1	1	2	0.19	0.01328	1
GO:0045623	negative regulation of T-helper cell dif...	2	0.83	0.19818	0.829605726762321	0	0.37	1	1	NA	NA	NA	NA	NA	NA	NA	NA
GO:0045651	positive regulation of macrophage differ...	3	1.53	0.1888	0.829605726762321	2	0.61	0.12078	1	0	0.77	1	1	1	0.38	0.3207	1
GO:0045654	positive regulation of megakaryocyte dif...	2	0.83	0.19818	0.829605726762321	1	0.37	0.31454	1	0	0.35	1	1	1	0.19	0.17576	1
GO:0045668	negative regulation of osteoblast differ...	6	3.89	0.18512	0.829605726762321	2	1.28	0.36953	1	3	1.89	0.29254	0.861801018600531	1	0.8	0.55627	1
GO:0045738	negative regulation of DNA repair	2	0.83	0.19818	0.829605726762321	NA	NA	NA	NA	2	0.42	0.06082	0.484588279301746	NA	NA	NA	NA
GO:0045787	positive regulation of cell cycle	18	14.47	0.19141	0.829605726762321	6	5.73	0.51494	1	8	6.72	0.35828	0.881559183673469	4	3.45	0.45487	1
GO:0045836	positive regulation of meiosis	3	1.53	0.1888	0.829605726762321	1	0.67	0.49971	1	0	0.7	1	1	2	0.38	0.05273	1
GO:0045907	positive regulation of vasoconstriction	5	3.06	0.18194	0.829605726762321	1	1.22	0.71629	1	3	1.4	0.16101	0.708529181004818	1	0.68	0.5016	1
GO:0046039	GTP metabolic process	61	54.81	0.19822	0.829605726762321	18	19.7	0.68995	1	33	25.28	0.06884	0.511713547646384	12	12.02	0.54475	1
GO:0046339	diacylglycerol metabolic process	3	1.53	0.1888	0.829605726762321	0	0.67	1	1	2	0.7	0.15178	0.692272805139186	1	0.38	0.3207	1
GO:0046500	S-adenosylmethionine metabolic process	2	0.83	0.19818	0.829605726762321	2	0.3	0.03283	1	0	0.42	1	1	0	0.19	1	1
GO:0046826	negative regulation of protein export fr...	2	0.83	0.19818	0.829605726762321	NA	NA	NA	NA	1	0.42	0.35322	0.874768965517241	NA	NA	NA	NA
GO:0048102	autophagic cell death	2	0.83	0.19818	0.829605726762321	2	0.37	0.04727	1	1	0.35	0.30449	0.861801018600531	0	0.19	1	1
GO:0048167	regulation of synaptic plasticity	17	13.49	0.18555	0.829605726762321	4	4.82	0.7182	1	12	6.51	0.02845	0.362142430278884	2	2.96	0.80142	1
GO:0048341	paraxial mesoderm formation	2	0.83	0.19818	0.829605726762321	0	0.37	1	1	2	0.42	0.06082	0.484588279301746	0	0.23	1	1
GO:0048521	negative regulation of behavior	7	4.73	0.18539	0.829605726762321	4	1.77	0.09722	1	2	1.96	0.59329	1	0	0.91	1	1
GO:0048523	negative regulation of cellular process	387	372.93	0.19442	0.829605726762321	141	141.01	0.51694	1	187	171.02	0.08102	0.537317342799189	71	83.18	0.95029	1
GO:0048617	embryonic foregut morphogenesis	3	1.53	0.1888	0.829605726762321	0	0.61	1	1	1	0.7	0.51635	0.963069614711033	2	0.34	0.04325	1
GO:0048864	stem cell development	34	29.07	0.18456	0.829605726762321	14	10.98	0.20893	1	14	13.8	0.51773	0.965080134189031	6	6.6	0.65143	1
GO:0048865	stem cell fate commitment	2	0.83	0.19818	0.829605726762321	1	0.37	0.31454	1	0	0.35	1	1	1	0.19	0.17576	1
GO:0050919	negative chemotaxis	3	1.53	0.1888	0.829605726762321	2	0.67	0.14189	1	1	0.77	0.55025	0.987402461538462	0	0.42	1	1
GO:0050957	equilibrioception	2	0.83	0.19818	0.829605726762321	0	0.3	1	1	2	0.42	0.06082	0.484588279301746	1	0.19	0.17576	1
GO:0051013	microtubule severing	2	0.83	0.19818	0.829605726762321	0	0.37	1	1	2	0.42	0.06082	0.484588279301746	0	0.23	1	1
GO:0051014	actin filament severing	2	0.83	0.19818	0.829605726762321	NA	NA	NA	NA	0	0.35	1	1	NA	NA	NA	NA
GO:0051046	regulation of secretion	66	59.26	0.18576	0.829605726762321	22	22.57	0.58208	1	37	25.77	0.0162	0.282239509536785	10	12.55	0.8124	1
GO:0051085	chaperone mediated protein folding requi...	3	1.53	0.1888	0.829605726762321	0	0.61	1	1	1	0.63	0.47989	0.943680638297872	2	0.34	0.04325	1
GO:0051091	positive regulation of sequence-specific...	29	24.48	0.18727	0.829605726762321	10	9.33	0.45779	1	15	11.7	0.19218	0.760394183168317	4	5.72	0.83014	1
GO:0051092	positive regulation of NF-kappaB transcr...	17	13.63	0.19723	0.829605726762321	4	5.25	0.77784	1	9	6.72	0.22887	0.807253669222344	4	3.3	0.42083	1
GO:0051152	positive regulation of smooth muscle cel...	2	0.83	0.19818	0.829605726762321	1	0.3	0.27	1	1	0.42	0.35322	0.874768965517241	0	0.19	1	1
GO:0051238	sequestering of metal ion	13	10.02	0.19457	0.829605726762321	2	3.66	0.88849	1	9	4.06	0.01862	0.299702267002519	3	2.05	0.33633	1
GO:0051458	corticotropin secretion	2	0.83	0.19818	0.829605726762321	2	0.37	0.04727	1	0	0.35	1	1	0	0.19	1	1
GO:0051825	adhesion to other organism involved in s...	2	0.83	0.19818	0.829605726762321	1	0.37	0.31454	1	1	0.35	0.30449	0.861801018600531	1	0.19	0.17576	1
GO:0051896	regulation of protein kinase B signaling	16	12.52	0.1791	0.829605726762321	2	4.57	0.94824	1	8	5.74	0.21458	0.786590742857143	5	2.77	0.1428	1
GO:0051900	regulation of mitochondrial depolarizati...	3	1.53	0.1888	0.829605726762321	0	0.61	1	1	1	0.7	0.51635	0.963069614711033	1	0.34	0.2939	1
GO:0060087	relaxation of vascular smooth muscle	2	0.83	0.19818	0.829605726762321	1	0.3	0.27	1	1	0.42	0.35322	0.874768965517241	0	0.23	1	1
GO:0060351	cartilage development involved in endoch...	5	3.06	0.18194	0.829605726762321	3	1.1	0.0931	1	2	1.54	0.46235	0.943680638297872	0	0.72	1	1
GO:0060452	positive regulation of cardiac muscle co...	2	0.83	0.19818	0.829605726762321	1	0.3	0.27	1	1	0.42	0.35322	0.874768965517241	0	0.23	1	1
GO:0060509	Type I pneumocyte differentiation	2	0.83	0.19818	0.829605726762321	0	0.37	1	1	1	0.35	0.30449	0.861801018600531	1	0.23	0.20702	1
GO:0060525	prostate glandular acinus development	3	1.53	0.1888	0.829605726762321	2	0.55	0.10055	1	0	0.7	1	1	1	0.38	0.3207	1
GO:0060547	negative regulation of necrotic cell dea...	2	0.83	0.19818	0.829605726762321	2	0.37	0.04727	1	0	0.35	1	1	0	0.19	1	1
GO:0060579	ventral spinal cord interneuron fate com...	3	1.53	0.1888	0.829605726762321	1	0.55	0.43254	1	2	0.77	0.1773	0.729988043478261	0	0.38	1	1
GO:0060581	cell fate commitment involved in pattern...	3	1.53	0.1888	0.829605726762321	1	0.55	0.43254	1	2	0.77	0.1773	0.729988043478261	0	0.38	1	1
GO:0060631	regulation of meiosis I	2	0.83	0.19818	0.829605726762321	1	0.37	0.31454	1	0	0.35	1	1	1	0.19	0.17576	1
GO:0060676	ureteric bud formation	2	0.83	0.19818	0.829605726762321	0	0.3	1	1	2	0.42	0.06082	0.484588279301746	0	0.19	1	1
GO:0060710	chorio-allantoic fusion	2	0.83	0.19818	0.829605726762321	NA	NA	NA	NA	0	0.42	1	1	NA	NA	NA	NA
GO:0060923	cardiac muscle cell fate commitment	2	0.83	0.19818	0.829605726762321	0	0.37	1	1	2	0.35	0.04249	0.423710747663551	0	0.19	1	1
GO:0060956	endocardial cell differentiation	2	0.83	0.19818	0.829605726762321	0	0.3	1	1	1	0.42	0.35322	0.874768965517241	1	0.19	0.17576	1
GO:0061316	canonical Wnt signaling pathway involved...	2	0.83	0.19818	0.829605726762321	0	0.37	1	1	2	0.35	0.04249	0.423710747663551	0	0.19	1	1
GO:0061383	trabecula morphogenesis	7	4.73	0.18539	0.829605726762321	1	1.71	0.82872	1	4	2.31	0.19736	0.761446924428822	2	1.02	0.27304	1
GO:0061430	bone trabecula morphogenesis	3	1.53	0.1888	0.829605726762321	1	0.49	0.39565	1	2	0.77	0.1773	0.729988043478261	0	0.3	1	1
GO:0061436	establishment of skin barrier	2	0.83	0.19818	0.829605726762321	NA	NA	NA	NA	1	0.35	0.30449	0.861801018600531	NA	NA	NA	NA
GO:0065009	regulation of molecular function	258	246.07	0.19684	0.829605726762321	91	91.61	0.54678	1	129	111.91	0.04027	0.423710747663551	45	53.72	0.92133	1
GO:0071321	cellular response to cGMP	2	0.83	0.19818	0.829605726762321	1	0.37	0.31454	1	1	0.42	0.35322	0.874768965517241	1	0.23	0.20702	1
GO:0071417	cellular response to organonitrogen comp...	60	53.55	0.18568	0.829605726762321	21	19.64	0.40713	1	29	24.37	0.18695	0.748674326862868	15	11.98	0.21924	1
GO:0071481	cellular response to X-ray	2	0.83	0.19818	0.829605726762321	NA	NA	NA	NA	1	0.42	0.35322	0.874768965517241	NA	NA	NA	NA
GO:0072160	nephron tubule epithelial cell different...	3	1.53	0.1888	0.829605726762321	0	0.55	1	1	3	0.7	0.02831	0.3618018	0	0.34	1	1
GO:0072178	nephric duct morphogenesis	2	0.83	0.19818	0.829605726762321	0	0.3	1	1	2	0.42	0.06082	0.484588279301746	0	0.19	1	1
GO:0072524	pyridine-containing compound metabolic p...	10	7.37	0.19453	0.829605726762321	3	2.5	0.46059	1	5	3.29	0.23068	0.807253669222344	2	1.52	0.45135	1
GO:0072673	lamellipodium morphogenesis	2	0.83	0.19818	0.829605726762321	NA	NA	NA	NA	1	0.35	0.30449	0.861801018600531	NA	NA	NA	NA
GO:0086013	membrane repolarization during cardiac m...	2	0.83	0.19818	0.829605726762321	0	0.3	1	1	2	0.42	0.06082	0.484588279301746	0	0.19	1	1
GO:0086067	AV node cell to bundle of His cell commu...	2	0.83	0.19818	0.829605726762321	NA	NA	NA	NA	1	0.42	0.35322	0.874768965517241	NA	NA	NA	NA
GO:0086070	SA node cell to atrial cardiac muscle ce...	2	0.83	0.19818	0.829605726762321	NA	NA	NA	NA	1	0.42	0.35322	0.874768965517241	NA	NA	NA	NA
GO:0090005	negative regulation of establishment of ...	3	1.53	0.1888	0.829605726762321	3	0.67	0.02577	1	0	0.7	1	1	0	0.38	1	1
GO:0090073	positive regulation of protein homodimer...	2	0.83	0.19818	0.829605726762321	1	0.3	0.27	1	1	0.42	0.35322	0.874768965517241	0	0.23	1	1
GO:0090330	regulation of platelet aggregation	3	1.53	0.1888	0.829605726762321	0	0.67	1	1	3	0.7	0.02831	0.3618018	1	0.38	0.3207	1
GO:0090381	regulation of heart induction	2	0.83	0.19818	0.829605726762321	0	0.37	1	1	2	0.35	0.04249	0.423710747663551	0	0.23	1	1
GO:1900125	regulation of hyaluronan biosynthetic pr...	2	0.83	0.19818	0.829605726762321	0	0.3	1	1	2	0.35	0.04249	0.423710747663551	NA	NA	NA	NA
GO:1900151	regulation of nuclear-transcribed mRNA c...	3	1.53	0.1888	0.829605726762321	1	0.55	0.43254	1	3	0.63	0.02088	0.31100979020979	0	0.27	1	1
GO:1901077	regulation of relaxation of muscle	2	0.83	0.19818	0.829605726762321	1	0.3	0.27	1	1	0.42	0.35322	0.874768965517241	0	0.23	1	1
GO:1901381	positive regulation of potassium ion tra...	2	0.83	0.19818	0.829605726762321	0	0.3	1	1	NA	NA	NA	NA	NA	NA	NA	NA
GO:1902603	carnitine transmembrane transport	3	1.53	0.1888	0.829605726762321	0	0.61	1	1	2	0.77	0.1773	0.729988043478261	2	0.42	0.06287	1
GO:2000050	regulation of non-canonical Wnt signalin...	3	1.53	0.1888	0.829605726762321	1	0.61	0.46718	1	2	0.77	0.1773	0.729988043478261	0	0.38	1	1
GO:2000052	positive regulation of non-canonical Wnt...	2	0.83	0.19818	0.829605726762321	1	0.3	0.27	1	1	0.42	0.35322	0.874768965517241	0	0.19	1	1
GO:2000060	positive regulation of protein ubiquitin...	3	1.53	0.1888	0.829605726762321	0	0.61	1	1	3	0.63	0.02088	0.31100979020979	1	0.34	0.2939	1
GO:2000107	negative regulation of leukocyte apoptot...	7	4.73	0.18539	0.829605726762321	1	1.83	0.84903	1	3	2.17	0.37114	0.896399366420275	3	1.1	0.0956	1
GO:2000116	regulation of cysteine-type endopeptidas...	27	22.53	0.1809	0.829605726762321	9	8.42	0.46753	1	13	10.15	0.21531	0.786590742857143	6	4.81	0.35063	1
GO:2000515	negative regulation of CD4-positive, alp...	2	0.83	0.19818	0.829605726762321	0	0.37	1	1	NA	NA	NA	NA	NA	NA	NA	NA
GO:2000543	positive regulation of gastrulation	2	0.83	0.19818	0.829605726762321	1	0.37	0.31454	1	1	0.42	0.35322	0.874768965517241	0	0.23	1	1
GO:2000678	negative regulation of transcription reg...	3	1.53	0.1888	0.829605726762321	0	0.61	1	1	2	0.7	0.15178	0.692272805139186	1	0.38	0.3207	1
GO:2000739	regulation of mesenchymal stem cell diff...	2	0.83	0.19818	0.829605726762321	0	0.3	1	1	2	0.35	0.04249	0.423710747663551	0	0.23	1	1
GO:2000780	negative regulation of double-strand bre...	2	0.83	0.19818	0.829605726762321	NA	NA	NA	NA	2	0.42	0.06082	0.484588279301746	NA	NA	NA	NA
GO:0002275	myeloid cell activation involved in immu...	9	6.54	0.19878	0.829878668326073	4	2.68	0.27978	1	6	3.01	0.07726	0.537317342799189	0	1.55	1	1
GO:0009308	amine metabolic process	27	22.81	0.19873	0.829878668326073	11	8.48	0.22753	1	12	10.29	0.33344	0.874768965517241	6	4.89	0.36426	1
GO:0021766	hippocampus development	9	6.54	0.19878	0.829878668326073	2	2.5	0.72308	1	8	3.01	0.00903	0.224520233463035	0	1.48	1	1
GO:0051289	protein homotetramerization	9	6.54	0.19878	0.829878668326073	3	2.62	0.49241	1	2	3.22	0.84241	1	4	1.63	0.07878	1
GO:0001649	osteoblast differentiation	22	18.22	0.19995	0.831824494730316	7	6.71	0.51009	1	10	8.68	0.36914	0.896399366420275	5	4.21	0.41274	1
GO:0002027	regulation of heart rate	12	9.18	0.19999	0.831824494730316	5	3.48	0.26656	1	7	4.41	0.14991	0.692272805139186	1	2.2	0.89448	1
GO:0030010	establishment of cell polarity	12	9.18	0.19999	0.831824494730316	1	3.35	0.96891	1	9	4.27	0.0252	0.341702542372881	1	2.01	0.87183	1
GO:0030804	positive regulation of cyclic nucleotide...	12	9.18	0.19999	0.831824494730316	6	3.29	0.10924	1	4	4.06	0.58652	1	1	2.01	0.87183	1
GO:0048660	regulation of smooth muscle cell prolife...	12	9.18	0.19999	0.831824494730316	4	3.48	0.46176	1	7	4.13	0.11663	0.623238712374582	1	2.01	0.87183	1
GO:0050864	regulation of B cell activation	12	9.18	0.19999	0.831824494730316	4	3.48	0.46176	1	5	3.85	0.34096	0.874768965517241	3	1.93	0.30486	1
GO:0050790	regulation of catalytic activity	209	198.22	0.20014	0.831932627013631	79	73.43	0.25487	1	103	89.43	0.06489	0.499574819277108	34	42.88	0.94441	1
GO:0000018	regulation of DNA recombination	7	4.87	0.20584	0.831980047732697	5	1.83	0.03329	1	1	1.75	0.83754	1	1	0.83	0.57313	1
GO:0000289	nuclear-transcribed mRNA poly(A) tail sh...	6	4.03	0.20784	0.831980047732697	2	1.34	0.39175	1	4	1.75	0.09349	0.575530924855491	1	0.76	0.53875	1
GO:0000768	syncytium formation by plasma membrane f...	6	4.03	0.20784	0.831980047732697	2	1.52	0.45609	1	4	1.82	0.10468	0.588825	1	0.91	0.60496	1
GO:0001736	establishment of planar polarity	6	4.03	0.20784	0.831980047732697	1	1.52	0.79303	1	5	2.03	0.04859	0.446106465517241	0	0.95	1	1
GO:0002063	chondrocyte development	4	2.36	0.20312	0.831980047732697	2	0.98	0.25491	1	1	1.12	0.68732	1	1	0.64	0.48192	1
GO:0002294	CD4-positive, alpha-beta T cell differen...	6	4.03	0.20784	0.831980047732697	2	1.71	0.51633	1	3	1.61	0.21542	0.786590742857143	2	0.87	0.21624	1
GO:0002718	regulation of cytokine production involv...	7	4.87	0.20584	0.831980047732697	1	1.89	0.85827	1	4	2.1	0.1549	0.696069620253165	3	0.99	0.07381	1
GO:0002763	positive regulation of myeloid leukocyte...	8	5.7	0.20265	0.831980047732697	4	2.07	0.15049	1	2	2.45	0.71412	1	2	1.18	0.3297	1
GO:0002791	regulation of peptide secretion	26	21.98	0.20481	0.831980047732697	8	8.36	0.60238	1	14	9.94	0.12199	0.637799060297572	4	4.97	0.73766	1
GO:0002833	positive regulation of response to bioti...	4	2.36	0.20312	0.831980047732697	2	0.91	0.23178	1	1	0.84	0.58178	1	1	0.42	0.34648	1
GO:0002920	regulation of humoral immune response	6	4.03	0.20784	0.831980047732697	2	1.4	0.4136	1	3	1.61	0.21542	0.786590742857143	0	0.72	1	1
GO:0003094	glomerular filtration	4	2.36	0.20312	0.831980047732697	2	0.98	0.25491	1	1	1.05	0.66374	1	1	0.57	0.44021	1
GO:0005976	polysaccharide metabolic process	16	12.8	0.20329	0.831980047732697	8	4.88	0.1135	1	6	5.39	0.45523	0.943680638297872	3	2.81	0.53632	1
GO:0006171	cAMP biosynthetic process	16	12.8	0.20329	0.831980047732697	10	4.88	0.02304	1	5	5.74	0.68923	1	2	2.92	0.79554	1
GO:0006184	GTP catabolic process	60	53.97	0.20323	0.831980047732697	17	19.46	0.75369	1	33	24.93	0.05912	0.484588279301746	12	11.9	0.53123	1
GO:0006779	porphyrin-containing compound biosynthet...	5	3.2	0.20765	0.831980047732697	3	1.34	0.14737	1	1	1.54	0.79791	1	0	0.8	1	1
GO:0006821	chloride transport	8	5.7	0.20265	0.831980047732697	2	2.07	0.62282	1	5	2.45	0.09464	0.577051145038168	2	1.14	0.31562	1
GO:0007164	establishment of tissue polarity	6	4.03	0.20784	0.831980047732697	1	1.52	0.79303	1	5	2.03	0.04859	0.446106465517241	0	0.95	1	1
GO:0009303	rRNA transcription	4	2.36	0.20312	0.831980047732697	3	0.98	0.06983	1	1	1.05	0.66374	1	0	0.53	1	1
GO:0009395	phospholipid catabolic process	5	3.2	0.20765	0.831980047732697	4	1.28	0.03577	1	2	1.47	0.43821	0.922374418604651	0	0.76	1	1
GO:0010564	regulation of cell cycle process	55	49.24	0.20446	0.831980047732697	24	19.03	0.14191	1	25	22.76	0.34117	0.874768965517241	8	11.37	0.88809	1
GO:0015012	heparan sulfate proteoglycan biosyntheti...	4	2.36	0.20312	0.831980047732697	0	0.85	1	1	3	0.98	0.06975	0.511713547646384	1	0.45	0.37128	1
GO:0030104	water homeostasis	6	4.03	0.20784	0.831980047732697	2	1.4	0.4136	1	1	1.26	0.72965	1	3	0.72	0.03335	1
GO:0030816	positive regulation of cAMP metabolic pr...	11	8.35	0.20549	0.831980047732697	5	3.05	0.18743	1	2	3.64	0.88791	1	3	1.82	0.27353	1
GO:0030818	negative regulation of cAMP biosynthetic...	6	4.03	0.20784	0.831980047732697	4	1.71	0.08783	1	2	1.82	0.55242	0.987402461538462	1	0.99	0.63443	1
GO:0030866	cortical actin cytoskeleton organization	4	2.36	0.20312	0.831980047732697	0	0.91	1	1	3	1.12	0.09684	0.579950890346767	1	0.53	0.41811	1
GO:0031098	stress-activated protein kinase signalin...	31	26.57	0.20137	0.831980047732697	13	9.45	0.15119	1	16	12.12	0.15433	0.696069620253165	3	5.5	0.91728	1
GO:0032965	regulation of collagen biosynthetic proc...	5	3.2	0.20765	0.831980047732697	1	1.16	0.69783	1	4	1.54	0.06364	0.492865496368039	0	0.76	1	1
GO:0033043	regulation of organelle organization	84	77.06	0.20774	0.831980047732697	28	29.21	0.62249	1	48	36.14	0.02554	0.344305063291139	14	17.67	0.85144	1
GO:0034105	positive regulation of tissue remodeling	5	3.2	0.20765	0.831980047732697	2	1.04	0.27809	1	2	1.19	0.33641	0.874768965517241	0	0.49	1	1
GO:0035195	gene silencing by miRNA	6	4.03	0.20784	0.831980047732697	3	1.59	0.20928	1	2	1.75	0.53092	0.978816733987305	1	0.91	0.60496	1
GO:0035924	cellular response to vascular endothelia...	5	3.2	0.20765	0.831980047732697	0	0.98	1	1	4	1.47	0.055	0.484588279301746	1	0.57	0.44021	1
GO:0038032	termination of G-protein coupled recepto...	7	4.87	0.20584	0.831980047732697	1	1.65	0.81756	1	4	2.24	0.18282	0.739379620253165	2	1.02	0.27304	1
GO:0042059	negative regulation of epidermal growth ...	7	4.87	0.20584	0.831980047732697	0	1.83	1	1	4	2.24	0.18282	0.739379620253165	3	1.06	0.08807	1
GO:0042093	T-helper cell differentiation	6	4.03	0.20784	0.831980047732697	2	1.71	0.51633	1	3	1.61	0.21542	0.786590742857143	2	0.87	0.21624	1
GO:0042267	natural killer cell mediated cytotoxicit...	7	4.87	0.20584	0.831980047732697	3	2.01	0.32674	1	4	1.75	0.09349	0.575530924855491	1	0.91	0.60496	1
GO:0042659	regulation of cell fate specification	4	2.36	0.20312	0.831980047732697	0	0.98	1	1	3	1.12	0.09684	0.579950890346767	1	0.61	0.46147	1
GO:0043281	regulation of cysteine-type endopeptidas...	25	21	0.20144	0.831980047732697	7	7.87	0.67915	1	13	9.38	0.14466	0.688636607142857	6	4.47	0.29014	1
GO:0043303	mast cell degranulation	5	3.2	0.20765	0.831980047732697	2	1.22	0.347	1	4	1.47	0.055	0.484588279301746	0	0.72	1	1
GO:0043370	regulation of CD4-positive, alpha-beta T...	5	3.2	0.20765	0.831980047732697	1	1.28	0.73363	1	3	1.26	0.12746	0.637799060297572	2	0.61	0.12134	1
GO:0043484	regulation of RNA splicing	11	8.35	0.20549	0.831980047732697	5	3.17	0.20915	1	8	4.06	0.04784	0.441759537572254	0	2.05	1	1
GO:0043516	regulation of DNA damage response, signa...	5	3.2	0.20765	0.831980047732697	2	1.16	0.32421	1	0	1.33	1	1	3	0.72	0.03335	1
GO:0043586	tongue development	4	2.36	0.20312	0.831980047732697	2	0.85	0.20879	1	2	1.12	0.30998	0.863834365460096	0	0.49	1	1
GO:0044711	single-organism biosynthetic process	169	159.41	0.20633	0.831980047732697	68	58.98	0.11532	1	64	70.66	0.8234	1	39	34.12	0.20787	1
GO:0045010	actin nucleation	4	2.36	0.20312	0.831980047732697	3	0.98	0.06983	1	1	1.12	0.68732	1	0	0.61	1	1
GO:0045428	regulation of nitric oxide biosynthetic ...	7	4.87	0.20584	0.831980047732697	2	1.89	0.57198	1	3	1.89	0.29254	0.861801018600531	2	1.06	0.28727	1
GO:0045621	positive regulation of lymphocyte differ...	11	8.35	0.20549	0.831980047732697	2	3.11	0.82658	1	5	3.43	0.2574	0.847391035548686	4	1.59	0.07355	1
GO:0046718	viral entry into host cell	5	3.2	0.20765	0.831980047732697	3	1.4	0.16226	1	2	1.33	0.38825	0.896399366420275	0	0.72	1	1
GO:0048511	rhythmic process	30	25.73	0.20741	0.831980047732697	10	9.51	0.4826	1	13	11.84	0.40426	0.906774631578947	7	5.72	0.34825	1
GO:0048566	embryonic digestive tract development	7	4.87	0.20584	0.831980047732697	2	1.95	0.58946	1	5	2.38	0.0858	0.547167664670659	0	1.21	1	1
GO:0048640	negative regulation of developmental gro...	6	4.03	0.20784	0.831980047732697	1	1.46	0.77955	1	5	1.89	0.03703	0.405426962457338	0	0.91	1	1
GO:0048857	neural nucleus development	4	2.36	0.20312	0.831980047732697	1	0.98	0.63492	1	3	1.12	0.09684	0.579950890346767	0	0.61	1	1
GO:0051048	negative regulation of secretion	20	16.41	0.20168	0.831980047732697	11	6.46	0.05786	1	10	7.21	0.18367	0.740941477272727	1	3.68	0.97693	1
GO:0051336	regulation of hydrolase activity	116	107.8	0.20329	0.831980047732697	34	39.52	0.84705	1	62	47.69	0.01857	0.299702267002519	21	22.9	0.69406	1
GO:0055065	metal ion homeostasis	59	53	0.2023	0.831980047732697	20	20.19	0.55134	1	30	23.11	0.08426	0.543375681130172	12	11.41	0.47142	1
GO:0060325	face morphogenesis	6	4.03	0.20784	0.831980047732697	0	1.65	1	1	5	2.03	0.04859	0.446106465517241	1	1.02	0.64833	1
GO:0070266	necroptotic process	4	2.36	0.20312	0.831980047732697	3	1.04	0.0811	1	0	1.05	1	1	1	0.57	0.44021	1
GO:0070741	response to interleukin-6	4	2.36	0.20312	0.831980047732697	4	1.04	0.01724	1	0	0.91	1	1	0	0.49	1	1
GO:0097205	renal filtration	4	2.36	0.20312	0.831980047732697	2	0.98	0.25491	1	1	1.05	0.66374	1	1	0.57	0.44021	1
GO:1901020	negative regulation of calcium ion trans...	4	2.36	0.20312	0.831980047732697	2	0.85	0.20879	1	2	0.98	0.2566	0.846065015479876	1	0.57	0.44021	1
GO:2001244	positive regulation of intrinsic apoptot...	7	4.87	0.20584	0.831980047732697	2	1.89	0.57198	1	3	2.38	0.42908	0.922374418604651	2	1.21	0.3437	1
GO:2001258	negative regulation of cation channel ac...	4	2.36	0.20312	0.831980047732697	2	0.85	0.20879	1	2	0.98	0.2566	0.846065015479876	1	0.57	0.44021	1
GO:0050867	positive regulation of cell activation	34	29.49	0.20851	0.834164335122242	9	10.8	0.75989	1	17	12.4	0.1142	0.618422033898305	8	5.91	0.24005	1
GO:0006461	protein complex assembly	127	118.65	0.2091	0.835535591206179	45	45.25	0.54003	1	59	54.21	0.26121	0.856843891170431	26	26.46	0.56844	1
GO:0008064	regulation of actin polymerization or de...	17	13.77	0.20925	0.835535591206179	6	5.55	0.48297	1	8	6.51	0.32607	0.874768965517241	5	3.45	0.26253	1
GO:0042552	myelination	15	11.96	0.2096	0.835535591206179	6	4.88	0.36197	1	7	5.46	0.30453	0.861801018600531	2	2.88	0.78951	1
GO:0048704	embryonic skeletal system morphogenesis	15	11.96	0.2096	0.835535591206179	4	4.57	0.67919	1	11	5.88	0.03183	0.388877142857143	2	3	0.80714	1
GO:1901069	guanosine-containing compound catabolic ...	60	54.11	0.20927	0.835535591206179	17	19.52	0.75812	1	33	25	0.06098	0.48525803237858	12	11.94	0.53575	1
GO:1901654	response to ketone	15	11.96	0.2096	0.835535591206179	3	4.21	0.80092	1	9	5.11	0.0677	0.511713547646384	2	2.46	0.7123	1
GO:0019882	antigen processing and presentation	31	26.71	0.20997	0.836513497624703	11	9.82	0.39334	1	13	12.47	0.47946	0.943680638297872	8	5.72	0.21433	1
GO:0002429	immune response-activating cell surface ...	28	23.93	0.21092	0.839360723177238	7	8.97	0.80062	1	16	11	0.08302	0.537485106382979	4	5.23	0.77368	1
GO:0043507	positive regulation of JUN kinase activi...	10	7.51	0.21106	0.839360723177238	3	2.56	0.47662	1	7	3.64	0.06899	0.511713547646384	1	1.59	0.80349	1
GO:0070301	cellular response to hydrogen peroxide	10	7.51	0.21106	0.839360723177238	3	2.74	0.52328	1	4	3.29	0.4202	0.922374418604651	2	1.55	0.46412	1
GO:0038179	neurotrophin signaling pathway	40	35.19	0.21213	0.843116214454976	7	12.93	0.97737	1	28	16.39	0.00368	0.132107865168539	6	7.92	0.81016	1
GO:0008277	regulation of G-protein coupled receptor...	20	16.55	0.21273	0.845000337477798	5	5.61	0.6683	1	14	7.42	0.01567	0.281267696629213	3	3.34	0.65419	1
GO:0009566	fertilization	18	14.74	0.21465	0.849635350618739	6	5.73	0.51494	1	9	5.46	0.09396	0.57675734870317	3	2.69	0.50827	1
GO:0009749	response to glucose	18	14.74	0.21465	0.849635350618739	6	5.43	0.4613	1	11	6.58	0.06351	0.492865496368039	3	3.22	0.63084	1
GO:0032640	tumor necrosis factor production	12	9.32	0.21491	0.849635350618739	6	3.72	0.16631	1	1	3.85	0.98176	1	4	1.93	0.12689	1
GO:0032680	regulation of tumor necrosis factor prod...	12	9.32	0.21491	0.849635350618739	6	3.72	0.16631	1	1	3.85	0.98176	1	4	1.93	0.12689	1
GO:0033002	muscle cell proliferation	18	14.74	0.21465	0.849635350618739	4	5.55	0.814	1	12	6.72	0.03532	0.405426962457338	2	3.3	0.84789	1
GO:0033238	regulation of cellular amine metabolic p...	12	9.32	0.21491	0.849635350618739	5	3.48	0.26656	1	5	4.62	0.49548	0.961177049180328	4	2.24	0.1844	1
GO:0044243	multicellular organismal catabolic proce...	12	9.32	0.21491	0.849635350618739	4	3.23	0.40638	1	6	4.13	0.23013	0.807253669222344	2	1.78	0.53687	1
GO:0048469	cell maturation	18	14.74	0.21465	0.849635350618739	3	5.31	0.90696	1	12	6.72	0.03532	0.405426962457338	4	3.26	0.41224	1
GO:0000079	regulation of cyclin-dependent protein s...	13	10.43	0.23795	0.852516027805362	9	4.09	0.01981	1	4	5.04	0.75204	1	1	2.43	0.91646	1
GO:0000245	spliceosomal complex assembly	7	5.15	0.24907	0.852516027805362	3	1.89	0.29265	1	3	2.45	0.44799	0.933373361591131	1	1.18	0.69885	1
GO:0001676	long-chain fatty acid metabolic process	12	9.46	0.23028	0.852516027805362	5	3.6	0.29045	1	6	3.71	0.16421	0.718699931506849	2	1.9	0.57062	1
GO:0001704	formation of primary germ layer	14	11.13	0.21619	0.852516027805362	4	4.45	0.65832	1	8	5.18	0.14484	0.688636607142857	2	2.69	0.75698	1
GO:0001738	morphogenesis of a polarized epithelium	7	5.01	0.2271	0.852516027805362	1	1.89	0.85827	1	5	2.45	0.09464	0.577051145038168	0	1.14	1	1
GO:0001754	eye photoreceptor cell differentiation	7	5.15	0.24907	0.852516027805362	1	1.89	0.85827	1	4	2.45	0.2274	0.807253669222344	2	1.1	0.30147	1
GO:0001778	plasma membrane repair	2	0.97	0.25309	0.852516027805362	0	0.37	1	1	1	0.42	0.35322	0.874768965517241	0	0.19	1	1
GO:0001844	protein insertion into mitochondrial mem...	5	3.34	0.23445	0.852516027805362	3	1.22	0.11907	1	1	1.54	0.79791	1	1	0.76	0.53875	1
GO:0001894	tissue homeostasis	25	21.56	0.24159	0.852516027805362	8	7.81	0.52407	1	11	9.03	0.29298	0.861801018600531	5	4.36	0.44283	1
GO:0001947	heart looping	8	5.98	0.24204	0.852516027805362	2	2.07	0.62282	1	4	2.8	0.3065	0.863834365460096	2	1.33	0.38509	1
GO:0002093	auditory receptor cell morphogenesis	2	0.97	0.25309	0.852516027805362	NA	NA	NA	NA	2	0.49	0.08128	0.537317342799189	1	0.19	0.17576	1
GO:0002228	natural killer cell mediated immunity	7	5.01	0.2271	0.852516027805362	3	2.07	0.3438	1	4	1.75	0.09349	0.575530924855491	1	0.91	0.60496	1
GO:0002251	organ or tissue specific immune response	3	1.67	0.22726	0.852516027805362	0	0.61	1	1	1	0.56	0.44069	0.922374418604651	1	0.23	0.20702	1
GO:0002279	mast cell activation involved in immune ...	5	3.34	0.23445	0.852516027805362	2	1.28	0.36953	1	4	1.54	0.06364	0.492865496368039	0	0.76	1	1
GO:0002287	alpha-beta T cell activation involved in...	6	4.31	0.25592	0.852516027805362	2	1.83	0.55395	1	3	1.68	0.23435	0.813414720260728	2	0.91	0.23038	1
GO:0002293	alpha-beta T cell differentiation involv...	6	4.31	0.25592	0.852516027805362	2	1.83	0.55395	1	3	1.68	0.23435	0.813414720260728	2	0.91	0.23038	1
GO:0002313	mature B cell differentiation involved i...	2	0.97	0.25309	0.852516027805362	0	0.3	1	1	1	0.49	0.39854	0.896399366420275	2	0.27	0.02652	1
GO:0002369	T cell cytokine production	3	1.67	0.22726	0.852516027805362	1	0.67	0.49971	1	2	0.7	0.15178	0.692272805139186	0	0.34	1	1
GO:0002446	neutrophil mediated immunity	4	2.5	0.23441	0.852516027805362	2	1.04	0.27809	1	2	1.19	0.33641	0.874768965517241	0	0.61	1	1
GO:0002448	mast cell mediated immunity	5	3.34	0.23445	0.852516027805362	2	1.22	0.347	1	4	1.54	0.06364	0.492865496368039	0	0.72	1	1
GO:0002468	dendritic cell antigen processing and pr...	2	0.97	0.25309	0.852516027805362	0	0.3	1	1	0	0.42	1	1	1	0.19	0.17576	1
GO:0002604	regulation of dendritic cell antigen pro...	2	0.97	0.25309	0.852516027805362	0	0.3	1	1	0	0.42	1	1	1	0.19	0.17576	1
GO:0002637	regulation of immunoglobulin production	5	3.34	0.23445	0.852516027805362	2	1.4	0.4136	1	1	1.26	0.72965	1	2	0.64	0.13422	1
GO:0002645	positive regulation of tolerance inducti...	2	0.97	0.25309	0.852516027805362	1	0.43	0.35637	1	1	0.49	0.39854	0.896399366420275	0	0.27	1	1
GO:0002664	regulation of T cell tolerance induction	2	0.97	0.25309	0.852516027805362	0	0.43	1	1	2	0.49	0.08128	0.537317342799189	0	0.27	1	1
GO:0002684	positive regulation of immune system pro...	83	76.65	0.22832	0.852516027805362	24	28.97	0.85996	1	41	32.57	0.07343	0.526619191919192	20	15.73	0.16017	1
GO:0002696	positive regulation of leukocyte activat...	32	28.24	0.24808	0.852516027805362	8	10.31	0.81695	1	16	11.91	0.13897	0.675299087452471	8	5.61	0.19944	1
GO:0002726	positive regulation of T cell cytokine p...	2	0.97	0.25309	0.852516027805362	1	0.43	0.35637	1	1	0.42	0.35322	0.874768965517241	0	0.23	1	1
GO:0002753	cytoplasmic pattern recognition receptor...	7	5.01	0.2271	0.852516027805362	2	2.07	0.62282	1	3	2.45	0.44799	0.933373361591131	2	1.25	0.35761	1
GO:0002824	positive regulation of adaptive immune r...	9	6.96	0.25397	0.852516027805362	4	2.74	0.29369	1	7	2.8	0.01967	0.305818248175182	0	1.4	1	1
GO:0002861	regulation of inflammatory response to a...	4	2.5	0.23441	0.852516027805362	2	0.85	0.20879	1	1	0.98	0.63838	1	0	0.45	1	1
GO:0002903	negative regulation of B cell apoptotic ...	2	0.97	0.25309	0.852516027805362	0	0.37	1	1	0	0.49	1	1	2	0.23	0.01943	1
GO:0003006	developmental process involved in reprod...	59	53.69	0.23364	0.852516027805362	16	20.43	0.87659	1	33	24.16	0.04129	0.423710747663551	12	11.9	0.53123	1
GO:0003073	regulation of systemic arterial blood pr...	12	9.6	0.24607	0.852516027805362	7	3.66	0.07134	1	5	4.27	0.42613	0.922374418604651	0	2.16	1	1
GO:0003105	negative regulation of glomerular filtra...	2	0.97	0.25309	0.852516027805362	1	0.37	0.31454	1	1	0.49	0.39854	0.896399366420275	0	0.23	1	1
GO:0003179	heart valve morphogenesis	5	3.34	0.23445	0.852516027805362	2	1.16	0.32421	1	3	1.68	0.23435	0.813414720260728	0	0.8	1	1
GO:0003382	epithelial cell morphogenesis	7	5.15	0.24907	0.852516027805362	0	1.95	1	1	7	2.45	0.0096	0.229707434944238	0	1.14	1	1
GO:0005975	carbohydrate metabolic process	103	96.68	0.25311	0.852516027805362	39	34.76	0.24627	1	42	43.14	0.59783	1	25	20.32	0.16415	1
GO:0006013	mannose metabolic process	2	0.97	0.25309	0.852516027805362	NA	NA	NA	NA	2	0.49	0.08128	0.537317342799189	NA	NA	NA	NA
GO:0006069	ethanol oxidation	2	0.97	0.25309	0.852516027805362	1	0.37	0.31454	1	NA	NA	NA	NA	NA	NA	NA	NA
GO:0006071	glycerol metabolic process	4	2.5	0.23441	0.852516027805362	2	1.04	0.27809	1	0	1.05	1	1	2	0.57	0.10879	1
GO:0006165	nucleoside diphosphate phosphorylation	2	0.97	0.25309	0.852516027805362	1	0.3	0.27	1	1	0.49	0.39854	0.896399366420275	0	0.19	1	1
GO:0006304	DNA modification	11	8.76	0.25465	0.852516027805362	3	3.35	0.66048	1	4	3.99	0.57253	1	4	1.93	0.12689	1
GO:0006405	RNA export from nucleus	10	7.79	0.24571	0.852516027805362	7	2.74	0.0182	1	2	3.29	0.85101	1	1	1.52	0.78762	1
GO:0006406	mRNA export from nucleus	9	6.96	0.25397	0.852516027805362	6	2.44	0.03282	1	2	2.87	0.79232	1	1	1.33	0.74213	1
GO:0006561	proline biosynthetic process	2	0.97	0.25309	0.852516027805362	2	0.43	0.06356	1	0	0.42	1	1	0	0.23	1	1
GO:0006612	protein targeting to membrane	20	16.69	0.22405	0.852516027805362	11	6.83	0.07922	1	8	7.63	0.49862	0.963069614711033	3	3.9	0.75493	1
GO:0006631	fatty acid metabolic process	40	35.89	0.25181	0.852516027805362	14	13.6	0.49541	1	18	15.06	0.24799	0.846065015479876	9	7.35	0.31544	1
GO:0006707	cholesterol catabolic process	2	0.97	0.25309	0.852516027805362	1	0.3	0.27	1	2	0.42	0.06082	0.484588279301746	0	0.19	1	1
GO:0006805	xenobiotic metabolic process	18	15.02	0.2391	0.852516027805362	5	5.37	0.62932	1	6	5.74	0.51713	0.964242982200175	6	2.77	0.05789	1
GO:0006837	serotonin transport	3	1.67	0.22726	0.852516027805362	0	0.67	1	1	1	0.7	0.51635	0.963069614711033	2	0.38	0.05273	1
GO:0006915	apoptotic process	202	192.8	0.23496	0.852516027805362	71	71.97	0.56986	1	92	87.75	0.3253	0.874768965517241	43	41.97	0.4567	1
GO:0006925	inflammatory cell apoptotic process	3	1.67	0.22726	0.852516027805362	1	0.55	0.43254	1	2	0.63	0.12709	0.637799060297572	0	0.3	1	1
GO:0006949	syncytium formation	6	4.31	0.25592	0.852516027805362	2	1.65	0.49674	1	4	1.96	0.12876	0.638801552795031	1	0.99	0.63443	1
GO:0006957	complement activation, alternative pathw...	2	0.97	0.25309	0.852516027805362	0	0.37	1	1	NA	NA	NA	NA	NA	NA	NA	NA
GO:0006991	response to sterol depletion	2	0.97	0.25309	0.852516027805362	1	0.3	0.27	1	1	0.49	0.39854	0.896399366420275	0	0.19	1	1
GO:0007093	mitotic cell cycle checkpoint	21	17.67	0.22815	0.852516027805362	11	6.77	0.07536	1	8	8.4	0.60967	1	4	4.17	0.60462	1
GO:0007156	homophilic cell adhesion	16	13.08	0.22889	0.852516027805362	3	4.64	0.85062	1	10	5.74	0.05955	0.484588279301746	2	2.5	0.72019	1
GO:0007160	cell-matrix adhesion	22	18.92	0.25442	0.852516027805362	4	6.59	0.90249	1	14	8.68	0.05126	0.463953824362606	5	3.87	0.34447	1
GO:0007173	epidermal growth factor receptor signali...	33	29.21	0.24991	0.852516027805362	8	11.1	0.87338	1	20	13.24	0.04177	0.423710747663551	6	6.52	0.64034	1
GO:0007205	protein kinase C-activating G-protein co...	6	4.31	0.25592	0.852516027805362	1	1.77	0.8392	1	3	2.1	0.35154	0.874768965517241	3	1.06	0.08807	1
GO:0007254	JNK cascade	24	20.73	0.24935	0.852516027805362	10	7.14	0.17605	1	12	9.59	0.25141	0.846065015479876	3	4.25	0.80315	1
GO:0007257	activation of JUN kinase activity	6	4.17	0.23149	0.852516027805362	2	1.4	0.4136	1	4	2.03	0.14159	0.682837811320755	0	0.87	1	1
GO:0007271	synaptic transmission, cholinergic	5	3.34	0.23445	0.852516027805362	1	1.22	0.71629	1	4	1.47	0.055	0.484588279301746	0	0.64	1	1
GO:0007281	germ cell development	20	16.97	0.24746	0.852516027805362	7	6.53	0.48054	1	9	7.7	0.36429	0.889836811926605	5	3.9	0.35205	1
GO:0007350	blastoderm segmentation	3	1.67	0.22726	0.852516027805362	1	0.61	0.46718	1	2	0.84	0.20341	0.761446924428822	0	0.38	1	1
GO:0007351	tripartite regional subdivision	3	1.67	0.22726	0.852516027805362	1	0.61	0.46718	1	2	0.84	0.20341	0.761446924428822	0	0.38	1	1
GO:0007440	foregut morphogenesis	3	1.67	0.22726	0.852516027805362	0	0.61	1	1	1	0.77	0.55025	0.987402461538462	2	0.34	0.04325	1
GO:0007492	endoderm development	9	6.82	0.23502	0.852516027805362	2	2.74	0.7696	1	5	3.08	0.1923	0.760394183168317	2	1.59	0.47671	1
GO:0007507	heart development	57	51.47	0.21911	0.852516027805362	16	19.03	0.79937	1	32	24.16	0.06194	0.491062779156328	9	11.6	0.8268	1
GO:0007520	myoblast fusion	5	3.34	0.23445	0.852516027805362	2	1.28	0.36953	1	3	1.54	0.19684	0.761446924428822	1	0.8	0.55627	1
GO:0007622	rhythmic behavior	5	3.34	0.23445	0.852516027805362	2	1.22	0.347	1	1	1.54	0.79791	1	2	0.68	0.14739	1
GO:0007623	circadian rhythm	16	12.94	0.21592	0.852516027805362	7	4.82	0.20569	1	7	6.09	0.40911	0.915545738045738	3	3	0.58097	1
GO:0008211	glucocorticoid metabolic process	4	2.5	0.23441	0.852516027805362	2	0.91	0.23178	1	2	1.05	0.28334	0.861801018600531	0	0.57	1	1
GO:0008595	anterior/posterior axis specification, e...	3	1.67	0.22726	0.852516027805362	1	0.61	0.46718	1	2	0.84	0.20341	0.761446924428822	0	0.38	1	1
GO:0008645	hexose transport	17	14.19	0.24722	0.852516027805362	7	5.37	0.28953	1	9	6.3	0.17757	0.729988043478261	3	3.18	0.62282	1
GO:0009057	macromolecule catabolic process	115	108.22	0.24856	0.852516027805362	57	40.25	0.00443	1	48	49.09	0.58946	1	16	23.28	0.96165	1
GO:0009066	aspartate family amino acid metabolic pr...	6	4.17	0.23149	0.852516027805362	3	1.71	0.2421	1	3	1.89	0.29254	0.861801018600531	0	1.02	1	1
GO:0009119	ribonucleoside metabolic process	92	85.27	0.22588	0.852516027805362	29	30.92	0.67046	1	45	39.22	0.18304	0.739801138519924	20	18.73	0.41331	1
GO:0009127	purine nucleoside monophosphate biosynth...	8	5.84	0.22202	0.852516027805362	1	2.2	0.89664	1	3	2.8	0.53815	0.98730361757106	5	1.4	0.01223	1
GO:0009143	nucleoside triphosphate catabolic proces...	76	70.39	0.24844	0.852516027805362	24	25.62	0.66194	1	38	32.64	0.18178	0.738914885496183	16	15.66	0.50172	1
GO:0009168	purine ribonucleoside monophosphate bios...	8	5.84	0.22202	0.852516027805362	1	2.2	0.89664	1	3	2.8	0.53815	0.98730361757106	5	1.4	0.01223	1
GO:0009888	tissue development	184	175.41	0.24172	0.852516027805362	62	65.14	0.68443	1	95	78.72	0.02752	0.358883265306122	32	37.84	0.86859	1
GO:0010459	negative regulation of heart rate	2	0.97	0.25309	0.852516027805362	0	0.37	1	1	2	0.49	0.08128	0.537317342799189	0	0.27	1	1
GO:0010608	posttranscriptional regulation of gene e...	52	47.29	0.24868	0.852516027805362	22	18.11	0.19916	1	22	21.78	0.51304	0.963069614711033	12	10.88	0.40587	1
GO:0010712	regulation of collagen metabolic process	5	3.34	0.23445	0.852516027805362	1	1.22	0.71629	1	4	1.54	0.06364	0.492865496368039	0	0.76	1	1
GO:0010715	regulation of extracellular matrix disas...	2	0.97	0.25309	0.852516027805362	0	0.43	1	1	2	0.42	0.06082	0.484588279301746	0	0.23	1	1
GO:0010758	regulation of macrophage chemotaxis	2	0.97	0.25309	0.852516027805362	0	0.37	1	1	1	0.42	0.35322	0.874768965517241	1	0.23	0.20702	1
GO:0010765	positive regulation of sodium ion transp...	4	2.5	0.23441	0.852516027805362	2	1.04	0.27809	1	1	1.26	0.72965	1	1	0.64	0.48192	1
GO:0010801	negative regulation of peptidyl-threonin...	2	0.97	0.25309	0.852516027805362	0	0.43	1	1	2	0.42	0.06082	0.484588279301746	1	0.23	0.20702	1
GO:0010829	negative regulation of glucose transport	3	1.67	0.22726	0.852516027805362	2	0.67	0.14189	1	1	0.84	0.58178	1	0	0.42	1	1
GO:0010832	negative regulation of myotube different...	2	0.97	0.25309	0.852516027805362	0	0.37	1	1	1	0.42	0.35322	0.874768965517241	1	0.19	0.17576	1
GO:0010863	positive regulation of phospholipase C a...	11	8.76	0.25465	0.852516027805362	1	3.23	0.96471	1	7	3.78	0.08116	0.537317342799189	2	1.93	0.58146	1
GO:0012501	programmed cell death	204	195.3	0.24899	0.852516027805362	73	73	0.52017	1	92	88.87	0.37445	0.896399366420275	43	42.57	0.49724	1
GO:0014060	regulation of epinephrine secretion	2	0.97	0.25309	0.852516027805362	2	0.37	0.04727	1	0	0.49	1	1	0	0.27	1	1
GO:0014808	release of sequestered calcium ion into ...	5	3.34	0.23445	0.852516027805362	1	1.34	0.74991	1	4	1.26	0.03317	0.389625551470588	1	0.76	0.53875	1
GO:0014866	skeletal myofibril assembly	2	0.97	0.25309	0.852516027805362	1	0.3	0.27	1	0	0.49	1	1	1	0.19	0.17576	1
GO:0014887	cardiac muscle adaptation	3	1.67	0.22726	0.852516027805362	0	0.55	1	1	3	0.84	0.04675	0.436804796511628	0	0.45	1	1
GO:0015758	glucose transport	17	14.19	0.24722	0.852516027805362	7	5.37	0.28953	1	9	6.3	0.17757	0.729988043478261	3	3.18	0.62282	1
GO:0015838	amino-acid betaine transport	3	1.67	0.22726	0.852516027805362	0	0.67	1	1	2	0.77	0.1773	0.729988043478261	2	0.42	0.06287	1
GO:0015879	carnitine transport	3	1.67	0.22726	0.852516027805362	0	0.67	1	1	2	0.77	0.1773	0.729988043478261	2	0.42	0.06287	1
GO:0016127	sterol catabolic process	2	0.97	0.25309	0.852516027805362	1	0.3	0.27	1	2	0.42	0.06082	0.484588279301746	0	0.19	1	1
GO:0016198	axon choice point recognition	2	0.97	0.25309	0.852516027805362	0	0.43	1	1	2	0.49	0.08128	0.537317342799189	0	0.27	1	1
GO:0016322	neuron remodeling	2	0.97	0.25309	0.852516027805362	0	0.3	1	1	2	0.49	0.08128	0.537317342799189	0	0.19	1	1
GO:0018209	peptidyl-serine modification	22	18.5	0.22102	0.852516027805362	6	6.71	0.66932	1	14	8.05	0.0297	0.37139530332681	3	3.83	0.74301	1
GO:0019083	viral transcription	19	15.86	0.23139	0.852516027805362	13	6.04	0.00693	1	5	7.14	0.85066	1	0	3.34	1	1
GO:0019218	regulation of steroid metabolic process	11	8.76	0.25465	0.852516027805362	6	3.54	0.14048	1	3	3.92	0.76157	1	1	2.01	0.87183	1
GO:0019317	fucose catabolic process	2	0.97	0.25309	0.852516027805362	1	0.37	0.31454	1	1	0.42	0.35322	0.874768965517241	0	0.19	1	1
GO:0019637	organophosphate metabolic process	171	161.78	0.21716	0.852516027805362	61	59.28	0.42543	1	75	72.97	0.41708	0.922096229678312	39	35.22	0.27118	1
GO:0019827	stem cell maintenance	16	13.21	0.24219	0.852516027805362	9	5.12	0.06925	1	5	6.23	0.75608	1	2	3.11	0.82345	1
GO:0019835	cytolysis	4	2.5	0.23441	0.852516027805362	1	0.98	0.63492	1	2	0.84	0.20341	0.761446924428822	1	0.42	0.34648	1
GO:0019884	antigen processing and presentation of e...	24	20.73	0.24935	0.852516027805362	8	7.68	0.50592	1	10	10.08	0.55845	0.994009888579387	8	4.66	0.09511	1
GO:0021561	facial nerve development	2	0.97	0.25309	0.852516027805362	1	0.43	0.35637	1	0	0.49	1	1	1	0.27	0.2371	1
GO:0021782	glial cell development	11	8.49	0.22142	0.852516027805362	4	3.29	0.42035	1	7	4.06	0.10897	0.606021148825065	0	1.97	1	1
GO:0021846	cell proliferation in forebrain	5	3.34	0.23445	0.852516027805362	0	1.04	1	1	4	1.61	0.07295	0.524353768278965	1	0.61	0.46147	1
GO:0021877	forebrain neuron fate commitment	2	0.97	0.25309	0.852516027805362	0	0.43	1	1	2	0.49	0.08128	0.537317342799189	0	0.27	1	1
GO:0021924	cell proliferation in external granule l...	3	1.67	0.22726	0.852516027805362	0	0.73	1	1	1	0.7	0.51635	0.963069614711033	2	0.42	0.06287	1
GO:0021930	cerebellar granule cell precursor prolif...	3	1.67	0.22726	0.852516027805362	0	0.73	1	1	1	0.7	0.51635	0.963069614711033	2	0.42	0.06287	1
GO:0022010	central nervous system myelination	3	1.67	0.22726	0.852516027805362	2	0.73	0.16371	1	1	0.77	0.55025	0.987402461538462	0	0.45	1	1
GO:0022027	interkinetic nuclear migration	2	0.97	0.25309	0.852516027805362	0	0.3	1	1	2	0.49	0.08128	0.537317342799189	0	0.19	1	1
GO:0022607	cellular component assembly	214	204.76	0.23973	0.852516027805362	72	77.09	0.75682	1	103	93.14	0.14112	0.682837811320755	45	45	0.5252	1
GO:0022617	extracellular matrix disassembly	17	13.91	0.2216	0.852516027805362	3	4.82	0.86839	1	10	6.09	0.08198	0.537317342799189	4	2.65	0.2739	1
GO:0022900	electron transport chain	12	9.6	0.24607	0.852516027805362	4	3.78	0.52822	1	4	4.41	0.65231	1	4	2.24	0.1844	1
GO:0030041	actin filament polymerization	16	13.35	0.25578	0.852516027805362	6	5.37	0.45038	1	7	6.23	0.43248	0.922374418604651	5	3.3	0.23392	1
GO:0030239	myofibril assembly	8	5.84	0.22202	0.852516027805362	1	1.95	0.86694	1	5	2.52	0.10391	0.587077718832891	2	1.14	0.31562	1
GO:0030397	membrane disassembly	6	4.17	0.23149	0.852516027805362	5	1.77	0.02916	1	0	1.82	1	1	1	1.02	0.64833	1
GO:0030511	positive regulation of transforming grow...	4	2.5	0.23441	0.852516027805362	1	1.04	0.65722	1	3	1.26	0.12746	0.637799060297572	0	0.64	1	1
GO:0030803	negative regulation of cyclic nucleotide...	6	4.17	0.23149	0.852516027805362	4	1.71	0.08783	1	2	1.82	0.55242	0.987402461538462	1	0.99	0.63443	1
GO:0030832	regulation of actin filament length	17	13.91	0.2216	0.852516027805362	6	5.61	0.49371	1	8	6.58	0.33675	0.874768965517241	5	3.49	0.26981	1
GO:0030835	negative regulation of actin filament de...	5	3.34	0.23445	0.852516027805362	2	1.34	0.39175	1	2	1.47	0.43821	0.922374418604651	2	0.8	0.18823	1
GO:0030902	hindbrain development	20	16.97	0.24746	0.852516027805362	6	6.65	0.66063	1	10	7.91	0.26695	0.861801018600531	4	3.87	0.54447	1
GO:0031077	post-embryonic camera-type eye developme...	2	0.97	0.25309	0.852516027805362	1	0.43	0.35637	1	1	0.42	0.35322	0.874768965517241	0	0.23	1	1
GO:0031099	regeneration	16	13.35	0.25578	0.852516027805362	4	5.37	0.79292	1	7	5.95	0.38568	0.896399366420275	5	3.03	0.1863	1
GO:0031103	axon regeneration	5	3.34	0.23445	0.852516027805362	2	1.4	0.4136	1	3	1.4	0.16101	0.708529181004818	0	0.72	1	1
GO:0031269	pseudopodium assembly	3	1.67	0.22726	0.852516027805362	1	0.49	0.39565	1	0	0.7	1	1	1	0.3	0.26605	1
GO:0031401	positive regulation of protein modificat...	102	94.73	0.2185	0.852516027805362	33	35.5	0.69776	1	54	43.35	0.05288	0.474852387640449	19	20.74	0.68914	1
GO:0031571	mitotic G1 DNA damage checkpoint	11	8.62	0.23782	0.852516027805362	5	3.35	0.24314	1	3	4.06	0.78219	1	4	2.09	0.15463	1
GO:0031665	negative regulation of lipopolysaccharid...	2	0.97	0.25309	0.852516027805362	0	0.37	1	1	0	0.49	1	1	2	0.23	0.01943	1
GO:0031958	corticosteroid receptor signaling pathwa...	2	0.97	0.25309	0.852516027805362	1	0.43	0.35637	1	1	0.49	0.39854	0.896399366420275	0	0.27	1	1
GO:0032042	mitochondrial DNA metabolic process	3	1.67	0.22726	0.852516027805362	1	0.49	0.39565	1	2	0.84	0.20341	0.761446924428822	0	0.3	1	1
GO:0032222	regulation of synaptic transmission, cho...	2	0.97	0.25309	0.852516027805362	0	0.43	1	1	2	0.42	0.06082	0.484588279301746	0	0.23	1	1
GO:0032228	regulation of synaptic transmission, GAB...	5	3.34	0.23445	0.852516027805362	1	1.22	0.71629	1	3	1.61	0.21542	0.786590742857143	1	0.72	0.52053	1
GO:0032229	negative regulation of synaptic transmis...	2	0.97	0.25309	0.852516027805362	1	0.43	0.35637	1	1	0.49	0.39854	0.896399366420275	0	0.27	1	1
GO:0032291	axon ensheathment in central nervous sys...	3	1.67	0.22726	0.852516027805362	2	0.73	0.16371	1	1	0.77	0.55025	0.987402461538462	0	0.45	1	1
GO:0032309	icosanoid secretion	5	3.34	0.23445	0.852516027805362	4	1.34	0.04168	1	2	1.4	0.4135	0.915545738045738	0	0.76	1	1
GO:0032317	regulation of Rap GTPase activity	3	1.67	0.22726	0.852516027805362	0	0.61	1	1	1	0.56	0.44069	0.922374418604651	2	0.34	0.04325	1
GO:0032386	regulation of intracellular transport	47	42.57	0.25164	0.852516027805362	16	16.28	0.56679	1	26	19.19	0.06954	0.511713547646384	9	9.55	0.62112	1
GO:0032411	positive regulation of transporter activ...	7	5.15	0.24907	0.852516027805362	2	2.07	0.62282	1	3	2.1	0.35154	0.874768965517241	4	1.18	0.02848	1
GO:0032413	negative regulation of ion transmembrane...	5	3.34	0.23445	0.852516027805362	2	1.28	0.36953	1	2	1.47	0.43821	0.922374418604651	2	0.83	0.20218	1
GO:0032464	positive regulation of protein homooligo...	2	0.97	0.25309	0.852516027805362	0	0.37	1	1	1	0.49	0.39854	0.896399366420275	1	0.27	0.2371	1
GO:0032535	regulation of cellular component size	30	25.87	0.2163	0.852516027805362	13	9.7	0.17243	1	15	12.19	0.23724	0.822106073752712	5	5.91	0.71067	1
GO:0032695	negative regulation of interleukin-12 pr...	3	1.67	0.22726	0.852516027805362	0	0.73	1	1	1	0.63	0.47989	0.943680638297872	2	0.38	0.05273	1
GO:0032700	negative regulation of interleukin-17 pr...	2	0.97	0.25309	0.852516027805362	2	0.37	0.04727	1	NA	NA	NA	NA	NA	NA	NA	NA
GO:0032703	negative regulation of interleukin-2 pro...	2	0.97	0.25309	0.852516027805362	1	0.37	0.31454	1	1	0.42	0.35322	0.874768965517241	0	0.19	1	1
GO:0032836	glomerular basement membrane development	2	0.97	0.25309	0.852516027805362	1	0.43	0.35637	1	1	0.35	0.30449	0.861801018600531	1	0.23	0.20702	1
GO:0033014	tetrapyrrole biosynthetic process	5	3.34	0.23445	0.852516027805362	3	1.4	0.16226	1	1	1.61	0.81209	1	0	0.83	1	1
GO:0033077	T cell differentiation in thymus	11	8.62	0.23782	0.852516027805362	1	2.93	0.95158	1	7	4.06	0.10897	0.606021148825065	2	1.93	0.58146	1
GO:0033138	positive regulation of peptidyl-serine p...	9	6.82	0.23502	0.852516027805362	2	2.74	0.7696	1	6	3.01	0.07726	0.537317342799189	1	1.55	0.79571	1
GO:0033209	tumor necrosis factor-mediated signaling...	6	4.31	0.25592	0.852516027805362	3	1.52	0.19326	1	2	1.96	0.59329	1	2	0.99	0.2588	1
GO:0033690	positive regulation of osteoblast prolif...	2	0.97	0.25309	0.852516027805362	1	0.37	0.31454	1	0	0.49	1	1	1	0.23	0.20702	1
GO:0034284	response to monosaccharide	19	16.14	0.25582	0.852516027805362	6	5.92	0.54614	1	11	7.28	0.11085	0.612946351931331	4	3.53	0.47165	1
GO:0034341	response to interferon-gamma	17	14.05	0.23426	0.852516027805362	6	5.18	0.41737	1	9	6.37	0.18574	0.744591342534504	2	3.03	0.81272	1
GO:0034613	cellular protein localization	132	124.5	0.23924	0.852516027805362	51	46.84	0.27845	1	61	56.66	0.28654	0.861801018600531	26	27.11	0.61939	1
GO:0034650	cortisol metabolic process	2	0.97	0.25309	0.852516027805362	1	0.37	0.31454	1	1	0.42	0.35322	0.874768965517241	0	0.23	1	1
GO:0034651	cortisol biosynthetic process	2	0.97	0.25309	0.852516027805362	1	0.37	0.31454	1	1	0.42	0.35322	0.874768965517241	0	0.23	1	1
GO:0034766	negative regulation of ion transmembrane...	3	1.67	0.22726	0.852516027805362	2	0.73	0.16371	1	1	0.77	0.55025	0.987402461538462	0	0.42	1	1
GO:0035089	establishment of apical/basal cell polar...	2	0.97	0.25309	0.852516027805362	1	0.43	0.35637	1	0	0.42	1	1	0	0.23	1	1
GO:0035107	appendage morphogenesis	22	18.5	0.22102	0.852516027805362	7	6.95	0.54853	1	14	9.03	0.06705	0.510666865315852	2	4.47	0.94205	1
GO:0035108	limb morphogenesis	22	18.5	0.22102	0.852516027805362	7	6.95	0.54853	1	14	9.03	0.06705	0.510666865315852	2	4.47	0.94205	1
GO:0035270	endocrine system development	20	16.69	0.22405	0.852516027805362	6	6.34	0.61514	1	11	7.77	0.15347	0.696069620253165	2	3.83	0.90085	1
GO:0035337	fatty-acyl-CoA metabolic process	5	3.34	0.23445	0.852516027805362	1	1.16	0.69783	1	3	1.54	0.19684	0.761446924428822	1	0.72	0.52053	1
GO:0035384	thioester biosynthetic process	6	4.17	0.23149	0.852516027805362	1	1.46	0.77955	1	4	1.96	0.12876	0.638801552795031	1	0.95	0.61998	1
GO:0035640	exploration behavior	3	1.67	0.22726	0.852516027805362	1	0.61	0.46718	1	1	0.7	0.51635	0.963069614711033	1	0.34	0.2939	1
GO:0035999	tetrahydrofolate interconversion	2	0.97	0.25309	0.852516027805362	2	0.37	0.04727	1	1	0.42	0.35322	0.874768965517241	0	0.19	1	1
GO:0036005	response to macrophage colony-stimulatin...	2	0.97	0.25309	0.852516027805362	0	0.37	1	1	1	0.42	0.35322	0.874768965517241	1	0.19	0.17576	1
GO:0036006	cellular response to macrophage colony-s...	2	0.97	0.25309	0.852516027805362	0	0.37	1	1	1	0.42	0.35322	0.874768965517241	1	0.19	0.17576	1
GO:0036109	alpha-linolenic acid metabolic process	2	0.97	0.25309	0.852516027805362	1	0.43	0.35637	1	1	0.42	0.35322	0.874768965517241	0	0.23	1	1
GO:0038003	opioid receptor signaling pathway	2	0.97	0.25309	0.852516027805362	0	0.43	1	1	1	0.42	0.35322	0.874768965517241	1	0.23	0.20702	1
GO:0040029	regulation of gene expression, epigeneti...	21	17.53	0.21705	0.852516027805362	8	6.65	0.34691	1	8	7.91	0.54031	0.987402461538462	5	3.94	0.35963	1
GO:0042113	B cell activation	24	20.73	0.24935	0.852516027805362	6	7.62	0.78216	1	11	9.03	0.29298	0.861801018600531	8	4.47	0.07911	1
GO:0042135	neurotransmitter catabolic process	2	0.97	0.25309	0.852516027805362	0	0.3	1	1	1	0.49	0.39854	0.896399366420275	1	0.23	0.20702	1
GO:0042268	regulation of cytolysis	2	0.97	0.25309	0.852516027805362	0	0.43	1	1	1	0.42	0.35322	0.874768965517241	1	0.23	0.20702	1
GO:0042354	L-fucose metabolic process	2	0.97	0.25309	0.852516027805362	1	0.37	0.31454	1	1	0.42	0.35322	0.874768965517241	0	0.19	1	1
GO:0042355	L-fucose catabolic process	2	0.97	0.25309	0.852516027805362	1	0.37	0.31454	1	1	0.42	0.35322	0.874768965517241	0	0.19	1	1
GO:0042482	positive regulation of odontogenesis	2	0.97	0.25309	0.852516027805362	1	0.43	0.35637	1	1	0.42	0.35322	0.874768965517241	0	0.23	1	1
GO:0042559	pteridine-containing compound biosynthet...	3	1.67	0.22726	0.852516027805362	2	0.61	0.12078	1	1	0.7	0.51635	0.963069614711033	1	0.38	0.3207	1
GO:0042743	hydrogen peroxide metabolic process	6	4.31	0.25592	0.852516027805362	0	1.28	1	1	4	1.89	0.11645	0.623238712374582	1	0.68	0.5016	1
GO:0042756	drinking behavior	2	0.97	0.25309	0.852516027805362	1	0.3	0.27	1	1	0.42	0.35322	0.874768965517241	0	0.19	1	1
GO:0043154	negative regulation of cysteine-type end...	10	7.65	0.22813	0.852516027805362	2	2.81	0.78011	1	6	3.43	0.12555	0.637799060297572	2	1.63	0.48912	1
GO:0043243	positive regulation of protein complex d...	4	2.5	0.23441	0.852516027805362	2	1.1	0.30121	1	1	1.26	0.72965	1	1	0.68	0.5016	1
GO:0043379	memory T cell differentiation	2	0.97	0.25309	0.852516027805362	1	0.43	0.35637	1	NA	NA	NA	NA	NA	NA	NA	NA
GO:0043380	regulation of memory T cell differentiat...	2	0.97	0.25309	0.852516027805362	1	0.43	0.35637	1	NA	NA	NA	NA	NA	NA	NA	NA
GO:0043497	regulation of protein heterodimerization...	2	0.97	0.25309	0.852516027805362	1	0.43	0.35637	1	1	0.49	0.39854	0.896399366420275	0	0.27	1	1
GO:0043517	positive regulation of DNA damage respon...	3	1.67	0.22726	0.852516027805362	1	0.55	0.43254	1	0	0.63	1	1	2	0.34	0.04325	1
GO:0043549	regulation of kinase activity	88	81.79	0.24055	0.852516027805362	38	30.56	0.09446	1	44	38.1	0.17468	0.729988043478261	10	18.31	0.98986	1
GO:0043627	response to estrogen	22	18.92	0.25442	0.852516027805362	5	7.07	0.84374	1	13	8.47	0.0805	0.537317342799189	6	4.28	0.25754	1
GO:0044246	regulation of multicellular organismal m...	6	4.31	0.25592	0.852516027805362	1	1.52	0.79303	1	4	2.03	0.14159	0.682837811320755	0	0.99	1	1
GO:0044557	relaxation of smooth muscle	2	0.97	0.25309	0.852516027805362	1	0.37	0.31454	1	1	0.49	0.39854	0.896399366420275	0	0.27	1	1
GO:0044723	single-organism carbohydrate metabolic p...	83	76.78	0.23374	0.852516027805362	28	27.87	0.51906	1	35	34.39	0.48238	0.943680638297872	22	16.45	0.10022	1
GO:0044783	G1 DNA damage checkpoint	11	8.76	0.25465	0.852516027805362	5	3.42	0.25478	1	3	4.13	0.79194	1	4	2.12	0.1619	1
GO:0044819	mitotic G1/S transition checkpoint	11	8.62	0.23782	0.852516027805362	5	3.35	0.24314	1	3	4.06	0.78219	1	4	2.09	0.15463	1
GO:0045023	G0 to G1 transition	2	0.97	0.25309	0.852516027805362	NA	NA	NA	NA	2	0.49	0.08128	0.537317342799189	NA	NA	NA	NA
GO:0045064	T-helper 2 cell differentiation	3	1.67	0.22726	0.852516027805362	0	0.67	1	1	2	0.7	0.15178	0.692272805139186	1	0.34	0.2939	1
GO:0045165	cell fate commitment	36	31.58	0.22081	0.852516027805362	11	12.2	0.68245	1	22	14.92	0.04273	0.423721395348837	3	7.43	0.98121	1
GO:0045191	regulation of isotype switching	3	1.67	0.22726	0.852516027805362	1	0.73	0.53026	1	1	0.56	0.44069	0.922374418604651	1	0.3	0.26605	1
GO:0045444	fat cell differentiation	22	18.78	0.24306	0.852516027805362	5	6.83	0.82121	1	10	8.68	0.36914	0.896399366420275	5	4.09	0.39001	1
GO:0045600	positive regulation of fat cell differen...	6	4.31	0.25592	0.852516027805362	2	1.52	0.45609	1	1	1.89	0.85955	1	1	0.87	0.58936	1
GO:0045638	negative regulation of myeloid cell diff...	11	8.49	0.22142	0.852516027805362	4	3.48	0.46176	1	6	3.71	0.16421	0.718699931506849	2	1.9	0.57062	1
GO:0045665	negative regulation of neuron differenti...	9	6.68	0.2166	0.852516027805362	2	2.56	0.7354	1	6	3.15	0.09198	0.574537829912024	1	1.48	0.77921	1
GO:0045719	negative regulation of glycogen biosynth...	2	0.97	0.25309	0.852516027805362	2	0.37	0.04727	1	0	0.49	1	1	0	0.23	1	1
GO:0045722	positive regulation of gluconeogenesis	2	0.97	0.25309	0.852516027805362	0	0.43	1	1	2	0.42	0.06082	0.484588279301746	0	0.23	1	1
GO:0045725	positive regulation of glycogen biosynth...	3	1.67	0.22726	0.852516027805362	1	0.67	0.49971	1	1	0.7	0.51635	0.963069614711033	1	0.42	0.34648	1
GO:0045730	respiratory burst	4	2.5	0.23441	0.852516027805362	1	0.91	0.61117	1	3	1.19	0.11175	0.612946351931331	0	0.53	1	1
GO:0045765	regulation of angiogenesis	24	20.59	0.23861	0.852516027805362	5	7.93	0.90488	1	15	9.31	0.04509	0.436804796511628	5	4.63	0.4945	1
GO:0045777	positive regulation of blood pressure	6	4.31	0.25592	0.852516027805362	2	1.46	0.43506	1	4	2.03	0.14159	0.682837811320755	0	0.91	1	1
GO:0045830	positive regulation of isotype switching	2	0.97	0.25309	0.852516027805362	1	0.43	0.35637	1	NA	NA	NA	NA	NA	NA	NA	NA
GO:0045916	negative regulation of complement activa...	2	0.97	0.25309	0.852516027805362	1	0.37	0.31454	1	1	0.49	0.39854	0.896399366420275	0	0.23	1	1
GO:0045986	negative regulation of smooth muscle con...	3	1.67	0.22726	0.852516027805362	2	0.67	0.14189	1	1	0.84	0.58178	1	0	0.45	1	1
GO:0046470	phosphatidylcholine metabolic process	10	7.65	0.22813	0.852516027805362	5	3.23	0.22031	1	4	3.15	0.38786	0.896399366420275	2	1.63	0.48912	1
GO:0046530	photoreceptor cell differentiation	8	5.98	0.24204	0.852516027805362	1	2.13	0.8899	1	4	2.73	0.29036	0.861801018600531	3	1.21	0.11967	1
GO:0046782	regulation of viral transcription	11	8.49	0.22142	0.852516027805362	6	2.99	0.0759	1	4	3.85	0.54377	0.987402461538462	0	1.67	1	1
GO:0046949	fatty-acyl-CoA biosynthetic process	4	2.5	0.23441	0.852516027805362	1	0.85	0.58588	1	3	1.19	0.11175	0.612946351931331	0	0.53	1	1
GO:0046950	cellular ketone body metabolic process	2	0.97	0.25309	0.852516027805362	1	0.37	0.31454	1	1	0.42	0.35322	0.874768965517241	1	0.23	0.20702	1
GO:0047484	regulation of response to osmotic stress	2	0.97	0.25309	0.852516027805362	1	0.43	0.35637	1	0	0.49	1	1	1	0.27	0.2371	1
GO:0048002	antigen processing and presentation of p...	25	21.42	0.23124	0.852516027805362	9	7.99	0.40583	1	10	10.29	0.5852	1	8	4.78	0.10554	1
GO:0048011	neurotrophin TRK receptor signaling path...	39	34.78	0.24221	0.852516027805362	7	12.81	0.97559	1	27	16.18	0.0059	0.170881900452489	6	7.85	0.8029	1
GO:0048262	determination of dorsal/ventral asymmetr...	2	0.97	0.25309	0.852516027805362	0	0.37	1	1	2	0.42	0.06082	0.484588279301746	0	0.19	1	1
GO:0048263	determination of dorsal identity	2	0.97	0.25309	0.852516027805362	0	0.37	1	1	2	0.42	0.06082	0.484588279301746	0	0.19	1	1
GO:0048285	organelle fission	64	58.42	0.23072	0.852516027805362	27	22.2	0.16777	1	29	26.26	0.31467	0.868124384980578	12	13.04	0.65904	1
GO:0048305	immunoglobulin secretion	3	1.67	0.22726	0.852516027805362	1	0.73	0.53026	1	0	0.7	1	1	2	0.38	0.05273	1
GO:0048563	post-embryonic organ morphogenesis	2	0.97	0.25309	0.852516027805362	1	0.43	0.35637	1	1	0.35	0.30449	0.861801018600531	1	0.19	0.17576	1
GO:0048642	negative regulation of skeletal muscle t...	2	0.97	0.25309	0.852516027805362	0	0.37	1	1	2	0.42	0.06082	0.484588279301746	0	0.23	1	1
GO:0048659	smooth muscle cell proliferation	12	9.6	0.24607	0.852516027805362	4	3.6	0.48878	1	7	4.27	0.13275	0.652517307692308	1	2.05	0.87672	1
GO:0048665	neuron fate specification	6	4.31	0.25592	0.852516027805362	3	1.59	0.20928	1	2	2.17	0.64924	1	1	1.02	0.64833	1
GO:0048672	positive regulation of collateral sprout...	2	0.97	0.25309	0.852516027805362	0	0.37	1	1	2	0.49	0.08128	0.537317342799189	0	0.23	1	1
GO:0048706	embryonic skeletal system development	19	15.86	0.23139	0.852516027805362	5	6.04	0.72979	1	13	7.7	0.04339	0.425901843317972	4	3.87	0.54447	1
GO:0048854	brain morphogenesis	5	3.34	0.23445	0.852516027805362	2	1.34	0.39175	1	2	1.68	0.50873	0.963069614711033	1	0.87	0.58936	1
GO:0050433	regulation of catecholamine secretion	6	4.31	0.25592	0.852516027805362	2	1.46	0.43506	1	3	2.1	0.35154	0.874768965517241	1	0.95	0.61998	1
GO:0050767	regulation of neurogenesis	63	57.45	0.23007	0.852516027805362	18	21.16	0.79601	1	39	27.03	0.01283	0.257810377358491	6	12.74	0.98955	1
GO:0050768	negative regulation of neurogenesis	15	12.1	0.22291	0.852516027805362	4	4.45	0.65832	1	10	5.81	0.06368	0.492865496368039	0	2.73	1	1
GO:0050801	ion homeostasis	71	64.82	0.21722	0.852516027805362	22	24.52	0.73398	1	34	28.64	0.16776	0.723270805369127	17	14.03	0.23936	1
GO:0050920	regulation of chemotaxis	17	14.05	0.23426	0.852516027805362	3	5.49	0.91856	1	9	6.3	0.17757	0.729988043478261	4	3.11	0.37764	1
GO:0050966	detection of mechanical stimulus involve...	2	0.97	0.25309	0.852516027805362	0	0.37	1	1	0	0.49	1	1	2	0.27	0.02652	1
GO:0051081	nuclear envelope disassembly	6	4.17	0.23149	0.852516027805362	5	1.77	0.02916	1	0	1.82	1	1	1	1.02	0.64833	1
GO:0051084	'de novo' posttranslational protein fold...	8	5.98	0.24204	0.852516027805362	3	2.2	0.37777	1	3	2.73	0.52078	0.969351645790854	2	1.25	0.35761	1
GO:0051128	regulation of cellular component organiz...	186	177.49	0.24515	0.852516027805362	62	66.91	0.76286	1	100	81.73	0.01703	0.287888095238095	29	39.77	0.97745	1
GO:0051147	regulation of muscle cell differentiatio...	18	15.02	0.2391	0.852516027805362	4	5.67	0.82705	1	11	6.93	0.08516	0.544717117117117	3	3.49	0.68365	1
GO:0051216	cartilage development	26	22.26	0.22418	0.852516027805362	9	8.05	0.41468	1	14	10.43	0.15994	0.708529181004818	3	5.08	0.88847	1
GO:0051255	spindle midzone assembly	2	0.97	0.25309	0.852516027805362	0	0.37	1	1	2	0.42	0.06082	0.484588279301746	0	0.23	1	1
GO:0051338	regulation of transferase activity	91	84.3	0.22561	0.852516027805362	41	31.59	0.05043	1	44	39.15	0.22619	0.807253669222344	10	18.88	0.99279	1
GO:0051340	regulation of ligase activity	14	11.27	0.23024	0.852516027805362	5	4.27	0.42536	1	7	5.53	0.31596	0.869502325581395	3	2.65	0.49873	1
GO:0051403	stress-activated MAPK cascade	30	26.43	0.25362	0.852516027805362	13	9.39	0.1461	1	15	12.05	0.22394	0.807093401015228	3	5.46	0.91497	1
GO:0051570	regulation of histone H3-K9 methylation	2	0.97	0.25309	0.852516027805362	0	0.37	1	1	1	0.49	0.39854	0.896399366420275	1	0.23	0.20702	1
GO:0051592	response to calcium ion	14	11.27	0.23024	0.852516027805362	3	4.45	0.83081	1	8	5.18	0.14484	0.688636607142857	5	2.69	0.13128	1
GO:0051823	regulation of synapse structural plastic...	2	0.97	0.25309	0.852516027805362	0	0.37	1	1	1	0.49	0.39854	0.896399366420275	1	0.27	0.2371	1
GO:0051881	regulation of mitochondrial membrane pot...	6	4.17	0.23149	0.852516027805362	2	1.52	0.45609	1	2	2.03	0.61265	1	1	0.95	0.61998	1
GO:0051882	mitochondrial depolarization	3	1.67	0.22726	0.852516027805362	0	0.61	1	1	1	0.77	0.55025	0.987402461538462	1	0.34	0.2939	1
GO:0051926	negative regulation of calcium ion trans...	4	2.5	0.23441	0.852516027805362	2	1.04	0.27809	1	2	1.12	0.30998	0.863834365460096	0	0.57	1	1
GO:0051937	catecholamine transport	8	5.98	0.24204	0.852516027805362	3	1.95	0.30968	1	5	2.87	0.15647	0.698259217877095	1	1.21	0.71031	1
GO:0055012	ventricular cardiac muscle cell differen...	4	2.5	0.23441	0.852516027805362	1	0.91	0.61117	1	2	1.26	0.36253	0.886215263963275	1	0.61	0.46147	1
GO:0055067	monovalent inorganic cation homeostasis	13	10.29	0.22308	0.852516027805362	4	3.78	0.52822	1	5	4.34	0.44019	0.922374418604651	4	2.05	0.14749	1
GO:0055080	cation homeostasis	63	57.31	0.22388	0.852516027805362	21	21.77	0.60186	1	32	25.07	0.09091	0.571455752212389	13	12.28	0.45754	1
GO:0055123	digestive system development	19	16.14	0.25582	0.852516027805362	4	6.1	0.86686	1	11	7.56	0.13428	0.656502830910482	4	3.68	0.50461	1
GO:0060052	neurofilament cytoskeleton organization	2	0.97	0.25309	0.852516027805362	2	0.43	0.06356	1	0	0.42	1	1	0	0.23	1	1
GO:0060073	micturition	2	0.97	0.25309	0.852516027805362	0	0.37	1	1	2	0.49	0.08128	0.537317342799189	0	0.23	1	1
GO:0060142	regulation of syncytium formation by pla...	3	1.67	0.22726	0.852516027805362	0	0.55	1	1	2	0.7	0.15178	0.692272805139186	1	0.34	0.2939	1
GO:0060218	hematopoietic stem cell differentiation	3	1.67	0.22726	0.852516027805362	3	0.73	0.03284	1	0	0.84	1	1	0	0.45	1	1
GO:0060252	positive regulation of glial cell prolif...	2	0.97	0.25309	0.852516027805362	0	0.37	1	1	1	0.42	0.35322	0.874768965517241	0	0.19	1	1
GO:0060259	regulation of feeding behavior	3	1.67	0.22726	0.852516027805362	2	0.55	0.10055	1	0	0.63	1	1	0	0.27	1	1
GO:0060324	face development	7	5.01	0.2271	0.852516027805362	0	2.07	1	1	5	2.52	0.10391	0.587077718832891	2	1.29	0.37141	1
GO:0060379	cardiac muscle cell myoblast differentia...	3	1.67	0.22726	0.852516027805362	1	0.61	0.46718	1	2	0.84	0.20341	0.761446924428822	0	0.38	1	1
GO:0060389	pathway-restricted SMAD protein phosphor...	7	5.01	0.2271	0.852516027805362	2	2.13	0.6387	1	5	2.38	0.0858	0.547167664670659	0	1.25	1	1
GO:0060394	negative regulation of pathway-restricte...	2	0.97	0.25309	0.852516027805362	0	0.43	1	1	2	0.42	0.06082	0.484588279301746	0	0.23	1	1
GO:0060428	lung epithelium development	7	5.15	0.24907	0.852516027805362	3	2.01	0.32674	1	3	2.38	0.42908	0.922374418604651	1	1.18	0.69885	1
GO:0060462	lung lobe development	2	0.97	0.25309	0.852516027805362	0	0.43	1	1	1	0.42	0.35322	0.874768965517241	1	0.27	0.2371	1
GO:0060463	lung lobe morphogenesis	2	0.97	0.25309	0.852516027805362	0	0.43	1	1	1	0.42	0.35322	0.874768965517241	1	0.27	0.2371	1
GO:0060548	negative regulation of cell death	86	79.71	0.23466	0.852516027805362	32	30.01	0.3776	1	34	37.54	0.75503	1	25	18.16	0.0644	1
GO:0060900	embryonic camera-type eye formation	3	1.67	0.22726	0.852516027805362	1	0.73	0.53026	1	2	0.84	0.20341	0.761446924428822	0	0.45	1	1
GO:0061005	cell differentiation involved in kidney ...	7	5.15	0.24907	0.852516027805362	3	1.83	0.27568	1	5	2.45	0.09464	0.577051145038168	0	1.18	1	1
GO:0061180	mammary gland epithelium development	12	9.46	0.23028	0.852516027805362	3	3.6	0.70669	1	7	4.62	0.17747	0.729988043478261	2	2.31	0.67885	1
GO:0061299	retina vasculature morphogenesis in came...	2	0.97	0.25309	0.852516027805362	0	0.37	1	1	1	0.42	0.35322	0.874768965517241	1	0.23	0.20702	1
GO:0065007	biological regulation	1062	1047.85	0.22636	0.852516027805362	385	390.33	0.69553	1	485	465.37	0.06136	0.487624472049689	209	223.03	0.95286	1
GO:0070098	chemokine-mediated signaling pathway	6	4.17	0.23149	0.852516027805362	1	1.59	0.80568	1	1	1.82	0.84895	1	3	0.91	0.06069	1
GO:0070271	protein complex biogenesis	127	118.93	0.21752	0.852516027805362	45	45.38	0.54772	1	59	54.35	0.26801	0.861801018600531	26	26.54	0.57455	1
GO:0070305	response to cGMP	2	0.97	0.25309	0.852516027805362	1	0.37	0.31454	1	1	0.42	0.35322	0.874768965517241	1	0.23	0.20702	1
GO:0070474	positive regulation of uterine smooth mu...	2	0.97	0.25309	0.852516027805362	0	0.37	1	1	2	0.49	0.08128	0.537317342799189	0	0.23	1	1
GO:0070727	cellular macromolecule localization	133	125.19	0.23055	0.852516027805362	51	47.08	0.29161	1	61	56.87	0.29701	0.861801018600531	27	27.22	0.54802	1
GO:0071107	response to parathyroid hormone	2	0.97	0.25309	0.852516027805362	0	0.3	1	1	2	0.35	0.04249	0.423710747663551	0	0.23	1	1
GO:0071318	cellular response to ATP	2	0.97	0.25309	0.852516027805362	1	0.3	0.27	1	1	0.49	0.39854	0.896399366420275	0	0.23	1	1
GO:0071380	cellular response to prostaglandin E sti...	2	0.97	0.25309	0.852516027805362	1	0.37	0.31454	1	1	0.42	0.35322	0.874768965517241	0	0.23	1	1
GO:0071466	cellular response to xenobiotic stimulus	18	15.16	0.25174	0.852516027805362	5	5.43	0.63932	1	6	5.81	0.5292	0.978816733987305	6	2.81	0.06109	1
GO:0071474	cellular hyperosmotic response	2	0.97	0.25309	0.852516027805362	1	0.43	0.35637	1	0	0.49	1	1	1	0.27	0.2371	1
GO:0071616	acyl-CoA biosynthetic process	6	4.17	0.23149	0.852516027805362	1	1.46	0.77955	1	4	1.96	0.12876	0.638801552795031	1	0.95	0.61998	1
GO:0072006	nephron development	14	11.27	0.23024	0.852516027805362	3	4.15	0.79279	1	11	5.25	0.01477	0.271989337175792	1	2.58	0.9285	1
GO:0072239	metanephric glomerulus vasculature devel...	2	0.97	0.25309	0.852516027805362	0	0.43	1	1	2	0.49	0.08128	0.537317342799189	0	0.27	1	1
GO:0072520	seminiferous tubule development	2	0.97	0.25309	0.852516027805362	1	0.43	0.35637	1	1	0.42	0.35322	0.874768965517241	0	0.23	1	1
GO:0086011	membrane repolarization during action po...	2	0.97	0.25309	0.852516027805362	0	0.37	1	1	2	0.49	0.08128	0.537317342799189	0	0.23	1	1
GO:0086012	membrane depolarization during cardiac m...	3	1.67	0.22726	0.852516027805362	1	0.61	0.46718	1	2	0.84	0.20341	0.761446924428822	1	0.38	0.3207	1
GO:0090087	regulation of peptide transport	26	22.26	0.22418	0.852516027805362	8	8.48	0.61888	1	14	10.08	0.13225	0.651258166409861	4	5.04	0.74837	1
GO:0090201	negative regulation of release of cytoch...	3	1.67	0.22726	0.852516027805362	1	0.61	0.46718	1	0	0.7	1	1	2	0.34	0.04325	1
GO:0090278	negative regulation of peptide hormone s...	6	4.31	0.25592	0.852516027805362	3	1.77	0.25882	1	3	2.03	0.33188	0.874768965517241	0	1.02	1	1
GO:0090288	negative regulation of cellular response...	14	11.41	0.24465	0.852516027805362	1	4.27	0.98798	1	9	5.11	0.0677	0.511713547646384	4	2.43	0.22395	1
[truncated: 4,710 more rows]
