# Supplementary material for: A panel of induced pluripotent stem cells from chimpanzees: a resource for comparative functional genomics
Source: eLife journal article supplement (doi:10.7554/elife.07103), 2015-06-23
Supplement: supp [file elife-07103-supp-v1.zip › elife_poa_e07103_Supplementary_File_9.txt]

ensg	H3K27ac_C3649	H3K27ac_C40280	H3K27ac_C8861	H3K27ac_HiPSC18a	H3K27ac_HiPSC20b	H3K27ac_HiPSCDF6.9	H3K27me3_C3649	H3K27me3_C40280	H3K27me3_C8861	H3K27me3_HiPSC18a	H3K27me3_HiPSC20b	H3K27me3_HiPSCDF6.9
ENSG00000000003	0	0	0	-1.2602626490244	0	0	0	33.1638744687542	0	0	0	0
ENSG00000000005	0	0	0	0	0	0	0	28.0618977380348	0	0	0	0
ENSG00000000419	26.6332122297438	22.863749433237	23.0256863164749	79.6427428774846	38.2190081695371	15.7675654057414	0	0	0	0	0	0
ENSG00000000457	40.3819289685286	31.1410948085231	28.4295853935568	69.4528643734716	44.9494315400982	24.3328995208835	0	0	0	0	0	0
ENSG00000000971	0	0	0	0	0	0	0	0	0	0	0	0
ENSG00000001036	14.0519798883972	11.9192784893652	11.7664403762092	17.1225759014802	24.234307458625	34.2942525351903	0	0	4.5757396830549	0	1.33736392181431	0
ENSG00000001084	0	0	0	0	0	0	0	0	0	0	0	0
ENSG00000001167	91.4895795783569	98.0594734103064	84.2954233592278	124.462797491478	96.1481785548479	203.867572882915	0	0	0	0	0	0
ENSG00000001460	1.67427303049395	0.354453675706235	3.39746535578996	0	0	0	0	0	0	2.08816458513274	0	0
ENSG00000001461	8.19837126992517	4.39053269082594	7.99276618951936	2.29720792284942	0.240553947954732	16.9112588720862	0	0	0	1.53010259975602	0	0
ENSG00000001497	2.04093265486203	6.51195486653544	4.97257965373793	0	14.4223357940594	0	0	0	0	0	0.183875577280875	0
ENSG00000001561	0	1.89442740446288	1.95710021045087	0	0	0	0	0	13.4794213986238	8.97168923284034	13.6662785206937	0
ENSG00000001626	0	0	0	0	0	0	0	0	0	0	0	0
ENSG00000001629	32.9835992682838	37.9445628941613	32.3550096054456	27.3637964416418	34.9853050308653	55.2783618435939	0	0	0	0	0	0
ENSG00000002079	0	0	0	0	0	0	0	0	0	0	0	0
ENSG00000002330	12.4240582623043	24.9260902258018	20.5951316971038	8.78844573762703	10.6865150919787	0	0	2.39561273896981	3.23588037570036	0.95208799735466	0.695565790268794	0
ENSG00000002549	9.20528050644853	11.4761832342346	11.5524270026759	0	4.37053692042073	0	0	0	0	4.3702973826607	2.20453105024642	0
ENSG00000002587	0	0	0	0	0	0	23.5111986823402	27.7304697385667	57.4074613827189	30.7141093665301	29.3281823060862	1.97426411712137
ENSG00000002726	0	0	0	0	0	0	0	0	0	0	0	0
ENSG00000002745	0	0	0	0	0	0	0	0	0	0	0.219860341887417	0
ENSG00000002822	23.7355847957177	22.3825644882169	19.2416931417971	13.8679823787889	15.3403520342346	0	0	0	0	0	0	0
ENSG00000002919	17.890636339865	21.1799854479467	18.6586465779415	23.1903033641731	19.9956424542538	59.6035377127313	0	0	0	0	0	0
ENSG00000002933	0	0	0	0	0	0	237.47793656597	96.6686417839912	192.288014666987	111.192158317796	104.223295904736	123.050096990953
ENSG00000003056	27.591561572424	31.0555846674117	30.5552713156873	71.377903980385	42.3931906936468	64.7021479176391	0	0	0	0	0	0
ENSG00000003096	0	0	1.7828797185903	0	0	0	0	24.4255401988461	5.1421419444294	4.65625523752945	6.34349792800364	0
ENSG00000003137	0	0	0	0	0	0	130.944550285371	51.1599655540387	89.4213276122207	123.539948201128	135.242405924615	198.665559426703
ENSG00000003147	4.48328206192879	6.57624256409425	8.03704445245903	0	9.1015495484638	0	0	3.92507856789188	9.04684245906801	10.5972555701455	7.21749070089527	0
ENSG00000003393	17.1015223207188	23.1933523422293	19.9099831338665	56.3497554410143	33.3253440182081	62.7329185670131	0	0	0	0	0	0
ENSG00000003400	5.91366290982814	7.34839475498424	4.88782295405483	16.6092374681825	8.93815497603411	0	0	0	0	0	0	0
ENSG00000003402	26.03244458461	24.9857076655963	23.5740187501015	0	15.361823270997	0	0	0	0	0	0	0
ENSG00000003509	31.3718429569575	39.8312903068728	39.6797466993254	54.3157487463494	68.1330745590842	27.2937008639342	0	0	0	0	0	0
ENSG00000003756	47.7494588164901	34.4496008726473	31.3730609359897	44.3954452619367	25.8053910504154	0	0	0	0	0	0	0
ENSG00000003987	4.3678081340979	11.133365946259	8.39410210596064	13.9783472744613	9.61561726825459	25.2078095170975	0	0	0	3.35724710529236	6.82138874169564	0
ENSG00000004139	0	0	0	0	0	0	0	0	0	0	0	0
ENSG00000004142	23.4000169665435	24.112705504482	24.2490987676268	29.650980716913	18.8953345354133	0	0	0	0	0	0	0
ENSG00000004455	0	0	0	0	0	0	53.7567713605646	20.3931493281173	59.3390308078907	39.0118224813436	45.6506305772042	79.0935542427565
ENSG00000004468	0	0	0	0	0	0	81.1378134236859	32.2941480314753	79.3799402593087	59.9306318097002	60.9632573203698	74.3424043123497
ENSG00000004478	10.1382162082497	20.0364877908213	19.1840911165826	0	0	0	0	4.10172578931396	9.35319476492627	10.2918711784351	8.90964334848449	0
ENSG00000004534	14.6426369728596	19.9561786962562	19.3674826530159	14.5325416664096	21.2556819604683	0	0	0	0	0	0	0
ENSG00000004700	18.8813589451073	17.1618056971837	15.2989465148971	0	14.8606976160884	25.8303940804917	0	0	0	0	0	0
ENSG00000004766	1.99123906706142	3.06124692543413	5.45823131070637	0	13.5485191055279	27.9340151661831	0	0	0	2.82356870653732	0	0
ENSG00000004776	25.1491103285298	49.3664318460307	35.5227083254058	61.1725676069299	32.8220314226997	0	0	-0.0597789469616199	15.6573398763509	0	7.89112292641957	0
ENSG00000004777	1.48750102531036	4.4978112487227	2.92791679585719	0	0	0	0	0	3.08848879813109	6.38974217752545	8.33014451348672	0
ENSG00000004779	15.8108857719808	21.29428056321	21.4452226661531	25.1638452643577	10.2136270868552	25.9629954499033	0	0	0	0	0	0
ENSG00000004799	0	0	0	0	0	0	25.9232844230482	13.659832268568	35.5029533862007	38.2226044169463	29.7971652194665	0
ENSG00000004809	0	1.45055542580208	0	0	0	0	56.5338589098502	16.2728211084701	48.5529089792878	0	20.6709143751106	0
ENSG00000004838	0	1.40235825105005	0	0	0	0	0	6.5031360829632	21.8369627179871	15.1153814681037	13.8718887463395	28.7062651448638
ENSG00000004846	0	0	0	0	0	0	0	0	0	0	0	0
ENSG00000004864	24.3404105540062	31.7793089332524	26.8007749193817	34.2580077940446	18.4871095473823	17.2650599653496	0	0	0	0	0	0
ENSG00000004866	26.2132415792917	34.2971826364009	30.4217942778733	13.5959105512955	26.8347478567201	67.9000883577426	0	0	0	0	2.74627839646863	0
ENSG00000004897	12.3878724516862	19.4643501463784	14.9883830891357	24.5392007693159	15.4507509315951	42.1566496805888	0	0	0	0	0	0
ENSG00000004939	0	2.45723887294335	0	0	0	0	0	0	0	0	0	0
ENSG00000004948	0	0	0	0	0	0	106.196864554836	43.4126348945414	94.7467028855606	106.18731234376	102.106960377069	84.4812332348637
ENSG00000004961	17.2992225946212	12.6612753971007	15.3140801092819	42.4495142173456	6.91141815946985	0	0	34.3245740405769	0	0	0	0
ENSG00000005001	0	0	0	0	0	0	0	12.804787716782	40.3191569173962	21.0224372103924	18.9681941522317	0
ENSG00000005020	0	0	0	0	0	0	0	6.16708257066951	11.3460623157177	34.0962057818082	28.2453788318599	0
ENSG00000005073	0	0	0	0	0	0	405.327344336417	148.806083320855	290.339844228875	249.596452886518	236.004098871373	456.307948439125
ENSG00000005100	22.7616156687352	24.6563454234844	23.0186600047643	0	11.6472774060344	0	0	0	0	0	0	0
ENSG00000005102	5.31806416113764	9.18529422336278	11.4030419660677	0	10.3148159668561	0	0	0	0	0	0	0
ENSG00000005108	0	0	0	0	0	0	0	11.1788819424503	26.4176035156361	8.27286380482776	9.994904094635	0
ENSG00000005156	35.8298325735731	39.3593588006644	31.4366469936035	62.8409932557919	29.2612970037668	0	0	0	0	0	0	0
ENSG00000005187	0	3.29445548492234	0	0	0	0	0	0	0	0	0.221836219011499	0
ENSG00000005189	48.5938809888529	41.6809327103163	35.2107800629426	39.2704008807786	24.3264428545915	90.9015402893144	0	0	0	0	0	0
ENSG00000005206	24.963123484512	29.4977506837129	29.1123918528905	34.4890059926191	18.4653731410013	0	0	0	0	0	0	0
ENSG00000005238	10.2202145499219	9.87125024692559	10.7027733082757	5.89761865117409	2.51279855036946	0	0	0	0	0	0	0
ENSG00000005249	0	9.14176746876188	5.94012644755423	0	0	0	0	0	0	7.08968133995417	7.22096341842923	0
ENSG00000005379	2.47822363055269	9.70923927842353	8.63341477858956	12.2047461921393	0	0	0	0	1.0159153107319	0	1.54495002458416	0
ENSG00000005381	3.71474671332736	0	5.6781354634962	0	0	0	0	1.04761350956618	6.46693428465722	1.37974396121956	0.516568921689696	0
ENSG00000005421	0	0	0	0	0	0	0	0	0	0	7.70179972850413	0
ENSG00000005436	19.4105106277374	18.5626105011734	15.7808416517449	25.1256113783161	26.5724575023843	0	0	0	0	0	0	0
ENSG00000005448	3.09895063676527	13.5260397147322	10.9647195020675	24.3787163140023	15.3481045946327	0	0	2.69604698653869	20.9788239027653	8.21971468328844	6.20401300009721	0
ENSG00000005469	6.82067051148195	10.8813094824469	12.92517515049	0	0	23.7552774474446	0	0	0	2.82790619154568	2.77323035771424	0
ENSG00000005471	0	0	0	0	0	0	0	0	0	1.733486939996	0.745591182930445	0
ENSG00000005483	159.626636973056	104.546552965936	95.873126776312	230.979122775621	156.807481037658	265.305948211207	0	0	0	0	0	0
ENSG00000005486	0	0	0	0	0	0	0	0	0	0	0	0
ENSG00000005700	23.1064790905077	26.1302227131323	24.6099968164828	31.3139721439111	20.5419595693064	59.1153448844025	0	0	0	0	0	0
ENSG00000005801	31.378823895155	26.6673821471764	27.9088250627226	51.8657044909879	39.9246222116013	0	0	0	0	0	0	0
ENSG00000005810	0	3.44215390329921	3.39248951769383	0.272071827493413	0	-0.740518261148631	0	12.4764642773942	35.5724233366745	22.3757518627712	16.9738535464388	0
ENSG00000005812	11.8851127230974	15.5775429555183	12.9718854264373	17.3356248694498	7.43034880804422	32.0233236398115	0	0	0	2.64733762636821	1.28712904096612	0
ENSG00000005844	0	0	0	0	0	0	0	0	0	0	1.11057202828521	0
ENSG00000005882	-0.0527668606607407	0.232595934451761	-0.862127813321984	0	0.654071583906584	0	0	0	0	1.92513059167249	2.67660962082281	0
ENSG00000005884	0	0	1.87561330235779	0	0	26.3350449461314	0	5.5737373182316	14.3308045859485	20.1573510187061	16.3182242750247	0
ENSG00000005893	7.63457893681799	8.26723789042357	7.29027232658354	10.1590732823238	10.4669708115234	0	0	18.6234989138674	0	0	0	0
ENSG00000005955	62.6889333363346	53.079010594549	46.2344748118939	51.4257883259197	36.1171950898075	37.4003108562277	0	0	0	0	0	0
ENSG00000005961	0	0	1.71778753782195	0	0	0	0	0	0.425691593662387	0	0.349758772258478	4.96973168004581
ENSG00000005981	0	1.58503946519564	0	0	0	0	0	0	0	0	0	0
ENSG00000006007	31.6653335665076	31.0089409397201	26.3540113410869	27.9669629561524	18.8377990050055	18.7460964876468	0	0	0	0	0	0
ENSG00000006015	44.2201134167504	63.4479561291827	44.505961528265	33.0466298581804	30.3640173255475	30.5843541379981	0	0	0	0	0.916925083444178	0
ENSG00000006025	13.933473378873	10.4143964390376	9.89376261104973	0	9.60888614142375	0	0	0	0	0	0	0
ENSG00000006042	14.2963224406109	32.0995810809123	18.1210276759394	0	13.0681379485001	0	0	0	10.6251492957218	7.68320828430675	12.0254389532209	0
ENSG00000006059	0	0	0	0	0	0	0	0	0	0	0	0
ENSG00000006062	0	0	0	0	0	0	0	0	0	0	0	0
ENSG00000006074	0	0	0	0	0	0	0	0	0	0	0	0
ENSG00000006114	9.80201294909653	11.7202760021155	9.57332016940671	37.6743082485569	19.2522442040086	0	0	0	0	0	0	0
ENSG00000006116	0	0	0	0	0	0	0	17.6518204857214	40.9585842055213	47.5495897736331	36.7192529155863	0
ENSG00000006125	20.7318519993797	25.8407841164334	24.9596747171193	47.0417024820469	43.6458827136884	32.4152750276397	0	0	0	0	1.33776243484558	0
ENSG00000006128	0	0	0	0	0	0	99.788233389301	40.3989778045103	80.7856412073134	86.7380092318471	90.606125136992	86.2590302540774
ENSG00000006194	0	1.73351460710271	1.61241574685031	0	0	0	0	5.16327408460486	12.3058740099394	9.3679307296168	2.92599273131481	0
ENSG00000006210	8.95511202650925	11.5041654392616	11.8755686873014	10.3900714808983	5.96601545281642	0	0	0	0	0	0	0
ENSG00000006282	10.8943901178551	11.5010585451408	13.9019585577971	0	0	0	0	0	0	9.78689719542448	8.38412166039653	0
ENSG00000006283	4.40131509061747	25.027144916487	20.7197041631469	0	5.33202597335803	23.7267729948002	104.648587106082	24.6673717931785	60.5533210625105	46.9887581148072	49.605512389494	116.439201266051
ENSG00000006327	66.7621112457891	43.71867316267	43.7731546376819	36.9416705050344	20.5281593525742	57.9699067693689	0	0	0	0	2.45565116911137	0
ENSG00000006377	0	0	0	0	0	0	206.869744123138	77.0305499786616	152.819119238236	148.486616210682	147.103639297478	217.916490976817
ENSG00000006432	13.4644744553472	18.0355585519918	18.8319164974282	31.4756790757322	12.1283853019439	40.2348566616903	0	0	0	0	0	0
ENSG00000006451	0	0	0	0	0	0	0	0	0	0	0	0
ENSG00000006459	9.3323487108438	15.2347256675427	25.1082866806554	0	12.018976531157	0	33.9686853061953	15.3581597376188	23.9364789804124	24.5237769775352	20.6728902522347	0
ENSG00000006468	57.127523602893	53.8299950787946	47.1976178439738	155.153367530056	74.2000699385596	117.933284164555	0	0	0	0	0	0
ENSG00000006530	13.3968936953293	16.6588523353782	15.2080911911899	0	15.3628151794973	37.9968438409334	0	0	0	0	0	0
ENSG00000006534	0	2.16261875971981	1.3056687895495	0	3.14675751314766	0	0	0	0	0	0.145914935550251	0
ENSG00000006555	0	0	1.67470197987188	0	0	0	0	3.01263522448891	20.6057510531269	3.04912114860046	11.1001334354443	0
ENSG00000006576	19.0159536181643	24.3244123439016	22.6131037243592	0	5.31028956697698	29.4315097257913	0	0	0	0	0	0
ENSG00000006607	14.337922712771	15.3575487750134	12.1921479040596	20.1975132617455	12.4124120626607	52.5356981571974	0	0	0	0	0	0
ENSG00000006611	0	0	0	0	0	0	0	6.74690019552208	18.3196610068625	12.1310940233485	11.1659658450986	0
ENSG00000006625	11.4067883222254	17.7285007833152	12.7175924427007	23.4829120061259	12.9369927713322	0	0	0	0	0	1.08526108138198	0
ENSG00000006634	38.9544822345744	48.7055759003573	40.1735324184171	66.1777340363209	49.188823283351	74.6141268200131	0	0	0	0	0	0
ENSG00000006652	20.8737317061262	28.0876151183909	31.7691570938431	31.3627265962052	39.4652507220728	0	0	0	0	0	0	0
ENSG00000006695	0	0	0	0	0	0	0	0	0	0	0	0
ENSG00000006712	30.4464550403325	29.6042525180795	25.3813164956202	41.2523156348902	24.8900333444645	45.3334668665981	0	0	0	0	0	0
ENSG00000006715	2.67983221664886	0.811564577542578	1.76836325132586	9.3120525781544	1.376660990822	0	0	0	0	0	0	0
ENSG00000006740	11.7343314187593	21.7567880189407	19.6200947477337	0	6.20656940077115	0	0	0	0	5.12342933081503	4.59096180064962	0
ENSG00000006744	12.1034747874534	16.4746176741722	16.1255261153455	17.2740144260715	16.0837502844799	0	0	0	0	0	0	0
ENSG00000006747	0	0	1.43258335949618	0	0	0	84.9355671515445	28.3765140272675	44.4810061668375	61.9340073954056	64.984390518687	0
ENSG00000006788	0	0	0	0	0	0	0	0	0	0	0	0
ENSG00000006831	0	1.94262457921491	2.44133745120226	12.6179881369943	11.5596050416286	0	0	0	0	1.72850178174828	0	0
ENSG00000006837	49.0915647488666	34.7037416487023	33.672852758356	67.8999930824944	45.5399482067945	37.0204581842759	0	0	0	0	0	0
ENSG00000007001	0	0	0	0	0	0	0	0	0	0	0	0
ENSG00000007062	41.6124183607804	32.7868501974984	26.5914587923157	0	8.44259232398573	0	0	0	0	33.1048141823107	28.9624647004396	0
ENSG00000007080	20.1256511121614	25.3450868935564	22.1668039899076	66.0160271044999	45.1465126752908	56.7593983658912	0	0	0	0	0	0
ENSG00000007168	31.1766484620801	36.8881288252076	33.2045235163988	36.6758490197962	35.6627673230857	0	0	0	0	0	0	0
ENSG00000007171	0	0	0	0	0	0	0	0	0	0	0.513666090112	0
ENSG00000007174	0	0	0	0	0	0	0	0	0	0	0	0
ENSG00000007202	26.9268994874379	36.9214493708556	36.8721739391872	26.3655551106273	36.8586067627169	18.0162904767062	0	0	0	0	0	0
ENSG00000007216	0	0	1.95990615819765	0	0	0	0	0	0	0	0	0
ENSG00000007237	0	5.29616144728198	4.30616792172888	0	0	0	58.9010595981848	24.9681529630322	50.2946384246097	37.2833206995953	33.6433934944731	0
ENSG00000007264	0	0	1.60538943513971	0	0	0	0	0	13.102933376017	17.1908033847344	12.4770148997403	0
ENSG00000007306	0	0	0	0	0	0	0	0	3.57006487270622	0	0.387928902175641	0
ENSG00000007312	3.99866476540387	7.05610481235129	6.00007057667227	0	4.82918167106752	0	0	0	0	0	0	0
ENSG00000007314	4.55745584081664	0	0	0	0	0	0	0	0	0	0	0
ENSG00000007341	33.3634998510402	28.9295316948464	24.3542759936706	50.8470294277396	34.759671282272	44.4999332154697	0	0	0	0	0	0
ENSG00000007350	1.65503580790822	0	0	0	0	0	0	0	0	0	0.625572138179791	0
ENSG00000007372	0	0	1.43960967120678	0	0	0	331.587144965455	123.522411794089	247.381930698303	178.924608415207	187.092176395024	262.750235848111
ENSG00000007376	16.0008596159247	23.9890668758452	18.4696377843979	0	0	0	0	0	0	0	0	0
ENSG00000007384	11.4241086474639	19.1549576217413	18.3111561665941	0	0	0	0	0.217431609319715	4.20771236556829	1.40319288148094	1.35733218124167	0
ENSG00000007392	34.5612604595974	29.0523252579917	24.8703884242435	33.2390117508245	17.8313836615429	0	0	0	0	0	0	0
ENSG00000007402	1.64637564528895	5.61643359494192	5.13228367833406	0	0	0	0	5.61867225180403	26.2566309827551	19.4917777434283	21.8121284805265	86.7475173252477
ENSG00000007516	16.2018167078025	10.9042531411854	10.4396973409124	18.0933230831453	9.06661666883892	0	76.679872456041	44.0635012834868	105.913693021347	44.8801097262418	44.7969172441169	9.10730540127334
ENSG00000007520	2.82583731006249	8.44874978215783	9.07244410114614	0	0	0	0	0	0	0	0	0
ENSG00000007541	20.5363947530155	25.8837997746608	22.4004818823556	0	5.63778914045589	19.7553982189263	0	0	0	0	0	0
ENSG00000007545	10.9775906621752	21.9651212675227	16.657533121854	7.0251130625347	2.62217680447611	18.7460964876468	66.3690397324196	19.8517463302262	59.1422165236684	33.9044623596878	23.5128728262813	0
ENSG00000007866	51.3260126741843	50.7826845189658	41.2113194446521	0	0	0	0	0	6.45149888623177	8.47070611961196	12.143272632661	0
ENSG00000007908	0	0	0	0	0	0	0	0	0	0	0	0
ENSG00000007923	27.5147538028081	30.3551822654169	28.9194345298017	42.622943179587	30.308278204465	0	0	0	0	0	1.54297414746008	0
ENSG00000007933	0	0	0	0	0	0	0	0	0	0	0	0
ENSG00000007944	16.279828496155	10.9953919495187	9.27927431660444	0	9.37008463995332	4.05847008161397	0	0	5.57400489987258	0	3.53273655462902	0
ENSG00000007952	0	0	0	0	0	0	0	12.8016454322605	0	0	0	0
ENSG00000007968	9.99496137257344	20.6171739794662	15.9827035466046	0	0	0	0	5.49232027592415	23.7942076530347	23.3771612220199	23.3551026279866	0
ENSG00000008018	37.6443098484386	34.0554200391105	30.1998269049429	96.2622487528969	36.5597738957615	28.4551240691338	0	0	0	0	0	0
ENSG00000008056	0	2.07710861860847	2.98832476881847	0	0	0	0	0	0	0	1.92674180720102	0
ENSG00000008083	106.458758150466	96.9668625599461	88.8335338251489	55.2478456971794	44.6435910819754	89.4496680518156	0	0	0	0	0	0
ENSG00000008086	11.8088718004602	17.0646346241495	17.6695570051501	0	3.43078427386448	0	0	8.93981871905249	0	0	0.981468029997052	0
ENSG00000008118	0	1.79414943730784	0	0	0	0	4.53350891999806	0.854989043398549	4.66724677971143	21.3416472179959	21.2846312505459	0
ENSG00000008130	110.981590209478	86.7690782843382	73.0338353150586	64.2629628366373	66.2115994755055	178.843529212816	0	0	0	0	0	0
ENSG00000008196	0	0	1.72481384953254	0	0	0	220.265195121893	80.1438394756929	147.895394277475	167.694610425695	174.045961357511	140.08746096583
ENSG00000008197	0	0	0	0	0	0	256.312233933558	105.117116939368	190.41344837457	202.325752679505	188.120576810938	276.066781975151
ENSG00000008226	0	0	0	0	0	0	47.0642056741898	19.0378271839471	36.5084135752012	51.2426729628963	46.7957964368682	0
ENSG00000008256	0	5.07383709618647	5.83007044877552	0	0	0	0	6.41205644952337	24.5692253586803	24.2915687756002	22.6555850834696	0
ENSG00000008277	9.4545684988224	15.1969838139498	15.9180912356116	0	0	0	0	0	0	1.15331111761652	0.853502450499476	0
ENSG00000008282	21.1493138269446	28.2174388166033	22.5339589201696	0	8.0201387358589	20.3615247450095	0	0	0	6.52717907950404	6.71936207924825	0
ENSG00000008300	37.2243391979865	41.3478503840408	33.8053792237963	79.5221095745825	44.862485914574	115.488026082408	0	0	6.57350834844047	0	0	0
ENSG00000008311	58.2384915048952	64.4424782061754	58.4158398841223	49.3041055640202	46.5898363630192	47.8238051201748	0	0	0	0	0	0
ENSG00000008323	6.14051376736828	20.014085291566	17.0925945866193	0	0	0	0	0	0	9.37809550997355	7.38305936251471	0
ENSG00000008324	20.8477512182684	30.2813330562285	24.7458159582004	47.8128447164213	36.3409563541879	63.5913705259162	0	0	0	0	0	0
ENSG00000008382	64.4084514913369	70.5713898342926	53.3884280566927	103.727481619511	51.2756276802702	137.027531723334	0	0	0	0	0.337077135253666	0
ENSG00000008394	61.0517847006436	56.4317707390858	53.3739476856522	81.2443686207559	55.1765751425485	18.7460964876468	0	0	0	0	0	0
ENSG00000008405	18.7640845972888	18.9559551344916	16.9544478196975	31.0932423525663	13.7021274279585	0	0	0	0	0	0	0
ENSG00000008516	27.078596521075	40.6109117392168	36.8545758094193	0	0	13.7818780178044	0	7.41586493558801	19.701823839818	17.9616751436723	29.6683339345694	0
ENSG00000008710	0	0	0	0	0	0	0	0	0	0	0.735502309123499	0
ENSG00000008735	0	0	0	0	0	0	0	4.86177016281972	23.2342671659199	19.3709669178171	35.8257709199815	62.2747720175183
ENSG00000008838	11.793252016158	15.5534443681423	16.221529490703	24.0065188466533	19.9949157153722	40.5036401318211	0	0	0	0	0	0
ENSG00000008853	8.03949664994659	4.58487483689444	5.52473790769175	0	0	0	0	0	0	0	0	0
ENSG00000008869	1.86530455662366	3.64971042835101	4.74404981294018	0	5.24508034783386	0	0	0	0	0	0	0
ENSG00000008952	27.2545969599402	27.8004369017628	23.0907306581697	36.198200306726	14.9153622261338	0	0	0	0	0	0	0
ENSG00000008988	40.7100389120413	40.2315582084121	35.243574478786	60.6336134141554	37.5205362098172	32.1741734121879	0	0	0	0	0	0
ENSG00000009307	12.7672960097226	8.05169982969282	13.0980045648696	57.1825169436231	33.9981492933109	-4.67378913473556	0	0	0	0	0	0
ENSG00000009413	67.2069559277918	68.1862528134398	49.6278920172742	52.4098481459747	42.501872725552	73.1330902977158	7.12420694318578	2.92155559104908	12.0055323334143	15.5676000866461	15.9243677414769	31.3712803600926
ENSG00000009694	0	0	0	0	0	0	0	27.9269134147478	0	0	0	0
ENSG00000009709	2.96520819404396	16.6767270555427	21.1191847042152	0	0	0	161.385039437247	47.739522366081	89.0127765643962	129.143863144973	127.136492483637	198.665559426703
ENSG00000009724	0	0	0	0	0	0	0	0	0	0	0	0
ENSG00000009765	0	0	0	0	0	0	0	0	0	0	0	0
ENSG00000009780	6.29146644114143	11.9060641103819	9.80092232251797	36.968457661749	6.81809573496687	0	0	0	4.15850879451271	2.27326423141491	0	0
ENSG00000009790	0	0	0	0	0	0	0	0	0	0	1.27132202397347	0
ENSG00000009830	32.6525703178061	37.3988483814108	34.1801373944929	66.8257764229516	42.7999385354906	48.7613250806135	0	0	0	0	0	0
ENSG00000009844	0	0	0	21.7093109238039	20.0173788606349	0	0	0	0	0	0	0
ENSG00000009950	0	5.11348023313639	3.34237764803316	0	0	0	38.6668293564312	14.8918892129922	38.9116119690802	15.3248647010076	18.1288987917233	0
ENSG00000009954	57.0034263474392	64.1455279223612	52.736568888172	50.8775136694569	43.6169701009199	41.2112423183478	0	0	0	0	0	0
ENSG00000010017	21.0412664887241	26.8290716680668	22.8552223447349	31.0110950947285	20.060851673397	32.8982336360256	0	0	0	0	0	0
ENSG00000010030	0	7.22634837104377	5.33741536478379	0	0	0	143.971405536499	59.0754408384668	130.132333302799	88.5614732840586	95.8255525926576	122.313885148042
ENSG00000010072	17.7485151981462	20.8488290918941	17.0050235332014	28.1389382952031	24.1256254267198	28.2192566736249	0	0	0	0	0	0
ENSG00000010165	14.447103744949	19.4721228752804	18.6371037989664	16.2062639305573	29.9822321087494	44.8288160009584	0	0	0	0	0	0
ENSG00000010219	0	0	2.98786092497523	0	0	0	0	6.70196526194965	19.3999215036273	28.585391536296	26.4667373255198	0
ENSG00000010244	45.6139583504523	38.3744437703086	33.3815499560062	91.0415419943734	52.2913812448549	17.4159097377259	0	0	0	0	0	0
ENSG00000010256	33.9473585007074	35.7565861737927	29.4656918138434	29.4170007488098	17.4866703852067	34.5026047572371	0	0	0	0	0	0
ENSG00000010270	12.649946795322	12.0405481497754	10.7361435055281	18.2519368403727	19.3174534231517	0	0	0	0	0	0	0
ENSG00000010278	89.9743024717797	72.4129943040492	64.4643204333285	0	7.99623033673016	62.2167196875558	0	0	0	20.7479166305698	24.9341901937988	0
ENSG00000010292	50.0869899851301	45.0301721423721	45.2983478477564	80.1738954096054	65.3478655931694	84.6919670095802	0	0	0	0	0	0
ENSG00000010295	0	5.81543608219161	9.12936253885861	0	0	0	0	0	2.81018878203798	0	0	0
ENSG00000010318	8.35724588990376	9.86549173460252	9.14012248600248	12.6388955126458	15.0563435655754	0	0	0	0.0576642761757715	0	0	0
ENSG00000010319	2.98398381570638	4.62054441581487	6.42600927604784	0	0	0	0	0	0	0	0	0
ENSG00000010322	14.4035974209257	18.6216880832179	15.9111003905119	0	8.95553221585016	0	0	0	0	0	0	0
ENSG00000010327	20.9396119252079	9.38896713076359	13.0913098408302	0	0	0	0	0	0	0	0	0
ENSG00000010361	34.7374554048145	35.3279646709181	27.3543247048653	55.412906655632	25.4138873142544	0	0	0	0	0	0	0
ENSG00000010379	0	0	0	0	0	0	0	0	0	0	0	0
ENSG00000010404	0	0	0	0	0	0	0	0	0	0	-0.0939136657645187	0
ENSG00000010539	19.2833911817874	14.5012924396987	14.3763980142112	18.1060947082903	8.56409830898698	36.8586061983612	0	0	0	0	0	0
ENSG00000010610	1.8398909157446	3.60306670065938	3.40420003721149	0	9.20044533036988	0	0	0	0	0	0	0
ENSG00000010626	21.5617580087349	27.4944912742929	23.5141439211901	10.0384399794217	20.453560466019	89.2023552482099	0	0	0	0	0	0
ENSG00000010803	6.55952209329799	14.7170044796935	9.20943503073465	0	0	0	0	7.04768136537572	22.1998697852821	10.7051761728363	13.6862467801211	0
ENSG00000010932	0	0	0	0	0	0	0	0	0	0	2.79609430094375	0
ENSG00000011007	16.1599264562984	25.2945595482137	20.0987200929915	14.2606875091845	14.8172248033264	15.0270471445927	0	0	0	0	0	0
ENSG00000011009	31.9960773485397	37.4241010885824	30.0227176713942	22.6541540287516	10.9480254925648	0	0	0	0	0	0	0
ENSG00000011021	45.8328692031664	60.7707828049207	54.7850922257944	34.8805329365187	32.2149116779785	72.7734434272348	0	0	0	0	0	0
ENSG00000011028	33.5387314387717	33.4156524673208	32.194377893163	9.73556293023911	16.3902401904594	0	0	2.74519387884884	11.7479324536851	6.96221475447102	5.45636254014418	0
ENSG00000011052	20.2920522008018	27.3055962719057	25.6360733232001	15.8238272073915	17.8313836615429	0	0	0	0	0	0	0
ENSG00000011083	0	0	0	0	0	0	176.214376297772	71.7442139882365	136.954980825848	110.751580617373	93.6232069077218	206.269681118589
ENSG00000011114	4.82185258804835	8.72510097159788	9.15324742173718	18.0004018273388	26.0486035325944	0	0	0	0	0	0	0
ENSG00000011132	44.6238025921887	41.3843866268699	37.136510196155	39.5788110410108	33.3905532373512	0	0	0	0	0	0	0
ENSG00000011198	13.4390608144681	24.1518386146185	22.6486991267554	28.3314504487133	23.7749359690966	39.1076212326564	0	0	0	2.4711065461991	2.22252343254969	0
ENSG00000011201	9.31502838560526	17.3600314609032	12.358855355679	0	0	0	0	5.54233001224451	0	10.9257434566518	7.21482629887044	0
ENSG00000011243	28.741158797645	27.5932157943875	25.9470406444647	29.9536130064441	16.5423950351267	0	0	0	0	0	0	0
ENSG00000011258	69.5425939441032	49.6830086735525	39.2669142348361	115.837559915612	84.8156607120264	19.4295494871798	0	0	0	0	0	0
ENSG00000011275	0	0	0	0	0	0	0	0	0	0	0	0
ENSG00000011304	61.4792818197575	64.3911741373026	56.4451508940935	24.6225413522482	26.7905483050764	23.2221221291605	0	0	2.38115673344701	0	0	0
ENSG00000011376	21.4370915295034	28.4979165207051	29.1222805093218	39.6298286460964	31.8794261058879	0	0	0	0	0	0	0
ENSG00000011405	28.8428133611612	37.0467114519772	34.2853961005838	52.5510182633363	43.703915726444	62.8179361901456	0	0	0	0	0	0
ENSG00000011422	5.8714957906893	8.70100238422186	11.5163677564364	1.23972583456495	8.80700979886622	39.1076212326564	0	5.2466236451388	9.05307222399864	11.4167562533847	19.5777497852323	0
ENSG00000011426	44.1828829134781	25.8706852185585	28.3521786802979	46.0066069556338	25.0357314519617	80.4965702671207	0	0	0	0	0	0
ENSG00000011454	11.899534311397	12.8462771970513	12.2007447347712	32.9794392121086	21.722778382813	38.5560115910036	0	0	0	0	0	0
ENSG00000011465	0	0	0	0	0	0	0	0	0	0	0	0
ENSG00000011478	39.4479130032348	49.0172935842722	40.8765268159539	65.66458105166	45.270195422419	41.1988891494383	0	0	0	0	0	0
ENSG00000011485	30.8161652560053	38.9901127547223	36.7332960196534	34.8919795302444	37.7386270125093	22.8518629985862	0	0	0	0	0	0
ENSG00000011523	13.2709591848915	21.4248549393578	16.1419208426702	0	18.9247446305297	0	0	0	0	0	2.52444217745713	0
ENSG00000011566	20.8887846434498	26.6821499732201	22.672584009634	0	8.56645585091149	20.1256573495006	0	0	0	0	0	0
ENSG00000011590	0	0.0654532946819385	1.94515064093139	0	0	0	0	0.665870032960297	0.558591778069334	0	1.16739244155948	0
ENSG00000011600	5.12045204063151	5.7402318685131	5.67428153694935	0	0	0	0	0	0	0	0	0
ENSG00000011638	23.2572603948457	33.4506352630896	19.1653542853544	6.00611701931454	12.1725848535876	0	0	0	0	6.2090828063167	4.32897957459688	0
ENSG00000011677	3.48782037052892	11.0203228422188	9.12896151306406	0	0	0	0	0	0	0	0	0
ENSG00000012124	0	0	0	0	0	0	0	0	0	0	0	0
ENSG00000012171	7.13254143600319	12.1664781513669	11.8685423755908	3.67810387477594	16.148959503623	11.5603232343585	0	0	4.15004808939252	0	2.35460722823137	0
ENSG00000012174	6.87087855855089	9.03138201674432	8.33508566452909	19.6533696067587	14.2477178041295	0	0	17.9436618163742	0	0	0	0
ENSG00000012232	9.58365088474058	9.16741950319828	9.8749190750572	0	0	0	0	0	0	0	0	0
ENSG00000012504	0	0	0	0	0	0	0	0	0	0	0	0
ENSG00000012660	11.3392075622075	17.1890111786805	17.6976622519925	24.3196643030656	13.2434826773117	0	0	0	0	5.0475115760582	6.15962235072277	0
ENSG00000012779	0	0	0	0	0	0	136.192910483971	47.4008135836293	101.387896874963	77.1164500361869	63.3055903094837	66.0020707775526
ENSG00000012822	0	1.99468511815879	5.52842357789438	0	13.0686241883117	0	0	0	0	0	1.65311930818026	0
ENSG00000012963	16.8664067781031	19.4721228752804	20.0387759638734	8.65754402749518	16.4329862643398	18.8804882227122	0	0	0	0	0	0
ENSG00000012983	11.9688801143963	19.5094358416397	14.2199521907723	17.1431127159396	23.5351087600235	0	0	0	2.65255670408549	5.73525295315919	7.25081106347699	0
ENSG00000013016	1.78097031834598	4.34933610681563	3.53672650265172	0	0	0	0	4.82843033860615	10.2163791122998	6.09879916440899	7.22075393024269	0
ENSG00000013275	35.2985387188039	44.3249809357871	38.890486654197	45.8995850491728	27.4462089297559	0	0	0	0	0	0	0
ENSG00000013297	2.44471667403312	0	5.11496126332284	0	0	0	30.8793818739729	21.9562404904748	63.049806348309	53.0709312028488	61.3250808435593	0
ENSG00000013364	10.3750322918017	6.36969351286997	6.3222845736113	0	5.44143474414487	0	0	0	0	0	0	0
ENSG00000013374	6.73741757945136	10.2347377805447	8.88582950226587	0	6.40292379708217	0	0	0	0	0	0	0
ENSG00000013375	20.7206830138732	16.1683366290258	12.3317006812104	0	0	0	0	0	0	0	0	0
ENSG00000013392	28.2490565969641	21.3888277178815	15.8193136469298	0	0	0	0	0	0	0	0	0
ENSG00000013441	52.7037658203379	44.3834452750385	42.5052777146839	70.8337603253982	42.0432279749052	0	0	0	0	0	0	0
ENSG00000013503	11.9013198075787	12.2608299753656	13.6419914682128	24.9538062314447	12.1116312472386	24.1761451777624	0	0	0	0	0	0
ENSG00000013523	0	0	0	0	0	0	0	0	0	0	0	0
ENSG00000013561	0.134594673057031	7.67099707323478	9.74895507748432	0	0	0	0	0	0	0	0	0
ENSG00000013563	8.3318322490247	18.328625218155	15.3762130590263	0	0	0	0	0	-0.181453533647503	0	0	0
ENSG00000013588	0	2.9998353716988	3.07076224928534	0	0	0	0	5.06832941471208	27.0808522594562	35.4279091995719	29.2948646368219	0
ENSG00000013619	0	0	0	0	0	0	88.2533485597845	40.1160019852999	64.2468152194371	69.3288798461226	71.2289988518545	123.348105274136
ENSG00000013725	0	0	0	0	0	0	0	0	0	0	0	0
ENSG00000013810	27.1844053456641	29.4535977906538	24.6430072176357	7.75915397183633	8.83515833200242	0	0	0	0	0	0	0
ENSG00000014123	45.5277891951382	29.718078161569	27.3671912540021	100.991662883413	74.1447782227581	0	0	0	0	0	0	0
ENSG00000014138	28.8930737959405	33.5983336814664	32.9549147404693	24.0270556611127	11.0140146654576	44.8288160009584	0	0	0	0	0	0
ENSG00000014164	12.5066919596457	13.5633993377055	13.3123495260741	18.2827420620619	13.0456748032374	0	0	0	0.0932868919195563	0	0	0
ENSG00000014216	19.4266972590184	20.9320090624148	18.4895741377312	16.0958990348849	19.7101622157737	80.7055807188894	0	0	0	0	1.35514681593105	0
ENSG00000014257	3.49435987667407	3.13354268756216	1.56184003334639	0	0	18.9984219204667	0	0	0	0	0	0
ENSG00000014641	50.8810230173854	62.5144130986342	55.9012411597613	59.5864547658213	50.1827511126369	0	0	0	0	0	0	0
ENSG00000014824	6.09908486464327	12.1276117379472	11.6704370008517	24.016787253883	14.8164980644447	0	0	0	0	0	0	0
ENSG00000014914	31.0793147889657	24.1819291575208	27.1418809528101	0	16.0564743503488	0	0	0	0	0	0	0
ENSG00000014919	13.6741763570839	20.5526555316101	18.6136827599311	33.9243255231729	11.5393221130108	67.1760281339049	0	0	0	0	0	0
ENSG00000015133	17.4203210046612	29.0844183684026	22.2997445417329	0	9.90875152830514	0	0	0	5.73549066212907	7.42931700381037	4.71864302486463	0
ENSG00000015171	5.79812384562308	10.0529931001364	9.19818678879253	0	0.068984707140653	0	0	8.22748196734222	24.9818870554431	34.7734316709232	33.6217470413368	0
ENSG00000015413	14.1363141266749	7.77827563113154	5.90172509741122	0	0	0	0	0	0.252698765135073	0	0.521779086794865	0
ENSG00000015475	31.032960319297	45.9046614259772	32.092085322702	11.6607039110275	0	0	0	0	0	0	4.5437031787661	0
ENSG00000015479	17.5625263963523	21.770002397924	19.4739795027155	50.5053453535208	34.7005515312668	28.4386660318228	0	0	0	0	0	0
ENSG00000015520	4.88134003242572	4.56077624951843	3.55312122997645	0	2.14179564744828	0	0	0	0	0	0	0
ENSG00000015592	0	0	0	0	0	0	0	0	0	0	0	0
ENSG00000015676	36.1897397952037	34.7684193931338	31.1352669094564	79.7471493236084	38.8583298778553	33.3138828261922	0	0	0	0	0	0
ENSG00000016082	0	4.61381856208164	5.9796215104734	0	0	19.338258284612	124.998376589102	51.9185227568334	96.190776192731	145.290413211301	151.053352315486	129.251747707001
ENSG00000016391	10.4657593047837	16.5741189177971	16.6092995122536	0	0	0	0	9.1809275614534	21.6639698894598	24.3580730810696	28.1834981764538	0
ENSG00000016402	3.68787514712972	5.49438721100146	4.69908599492983	0	0	0	41.0638863882343	11.9985986434088	45.5138428878098	38.6543751627576	38.1760074175916	0
ENSG00000016602	0	0	0	0	0	0	0	0	0	0	0	0
ENSG00000016864	27.0460201440896	42.0677491092429	33.0873389076616	28.9074030933623	25.7099975035155	0	0	0	0	0	0	0
ENSG00000017260	0	0	1.40262273728081	0	6.09716062998431	0	0	0	0	0	0	0
ENSG00000017373	4.30136106803751	16.9418115166788	13.9998401932149	0	0	0	18.2317066580063	9.53050870133242	29.6229815257843	17.3609355722397	25.4615587700338	23.5677931057846
ENSG00000017427	2.26795488183725	0	0	0	0	0	0	0	0	0	0	0
ENSG00000017483	11.1456922917518	19.999174824462	20.6030856965009	0	9.22145499786929	0	0	0	0	0	0	0
ENSG00000017797	17.2609637876762	25.1857275432566	20.5824934898996	0	28.16793603478	29.8017688563656	0	0	0	0	0	0
ENSG00000018189	13.7584160792847	9.26261291223718	8.94399197659106	41.1137387761669	14.3658999065229	32.4278761395736	0	0	5.40380061182679	0	3.76879784273503	0
ENSG00000018236	0	0	1.65784340870391	0	0	0	0	3.3808187947012	6.36489290416937	10.4469284452465	9.66116182755571	0
ENSG00000018280	0	0	0	0	0	0	0	0	0	0	2.03667197814473	0
ENSG00000018408	0	0	0	0	0	0	0	0	0	0	0	0
ENSG00000018510	10.868976476976	16.6464146799251	15.6178678355588	14.563564558367	16.2148954616478	0	0	0	0	0	0	0
ENSG00000018625	21.8055337139699	42.8885762921354	48.5002002397059	0	5.57257992131276	0	0	0	0	0	0	0
ENSG00000018699	7.65246610903528	13.5019877839702	12.5522765226111	23.3622787032238	11.1016870298634	35.5229636246677	0	0	0	0	0	0
ENSG00000018869	23.2491670792052	19.7791806439571	19.3854662829118	24.1682257784743	16.1714226488857	0	0	0	0	0	0	0
ENSG00000019102	0	0	1.89256948679446	0	0	0	261.957866339702	97.6146450036341	211.220732543411	87.716693506452	145.842179018363	270.896611613153
ENSG00000019144	0	0	0	0	0	0	64.5322322088017	22.6755204102153	45.737230889111	79.3056283468376	72.7628784159336	131.851175695302
ENSG00000019169	0	0	0	0	0	0	0	0	0	0	0	0
ENSG00000019186	0	0	0	0	0	0	246.550960280567	85.3935587342504	180.520052846725	126.925572928242	136.10171838104	0
ENSG00000019505	0	2.9990586481686	7.26311765211495	0	6.20656940077115	0	0	12.0730083647419	25.2355954218316	20.5585776737303	18.4128251543275	0
ENSG00000019549	0	0	0	0	0	0	1.41016495282256	7.71992570583925	17.48010836577	27.2017116168394	22.1883944227433	0
ENSG00000019582	5.20831628198091	11.13724956391	6.84960737231276	16.0753622204254	9.28811769477569	33.7896016695505	0	0	0	0	0	0
ENSG00000019991	0	0	0	0	0	0	128.638801447263	50.1441567653921	123.257275027797	0	3.50903025035702	0
ENSG00000019995	0	0	0	7.22530603942004	7.25573081811425	0	0	0	0	0	0	0
ENSG00000020129	96.4455213044025	93.3654392081824	79.2343338516148	92.4640410883834	70.9122453405005	127.751474672343	0	0	0	0	0	0
ENSG00000020256	0	0	0	0	0	0	0	0	0	0	0	0
ENSG00000020426	11.1208454978515	11.181563121011	10.3619622635554	13.1621317919811	16.5858678478888	0	0	0	0	2.49881667347805	2.17052216276395	0
ENSG00000020577	23.1815863191873	18.5633872247036	17.4119942298235	0	0	0	0	0	9.3142316942539	27.7275179716897	24.4921554909677	0
ENSG00000020633	0	0	0	0	0	0	0	0	0	0	0	0
ENSG00000020922	35.7127868521045	30.9128289717039	24.9762755443382	52.4849251416552	23.2586412597115	96.7002580850721	0	0	0	0	0	0
ENSG00000021300	0	5.41109486719884	6.31255573108222	0	12.1584896176904	0	0	3.70840133418144	19.4279677608419	5.9204953583442	7.12691491338886	0
ENSG00000021355	16.2696743354551	20.1398726520971	17.7107871877272	14.2196138802656	12.6747024169964	63.7257622609816	0	0	0	0	1.49097287767435	0
ENSG00000021461	0	0	0	0	0	0	0	0	0	0	0	0
ENSG00000021488	6.69832062161955	4.02986134933373	8.72972695284575	0	8.61286687138294	0	0	0	0	0	0	0
ENSG00000021574	23.6864580548959	26.1791966114146	23.5694038425011	13.7370806686571	24.1031622814572	46.5621779560755	0	0	0	0	0	0
ENSG00000021645	2.90628759664534	0	0	0	0	0	0	0	0	0	0	0
ENSG00000021762	0	0	0	0	0	0	0	5.70202181233796	10.7896814191289	17.0749777173709	15.1410254050023	46.1309512284132
ENSG00000021776	17.3701448198541	14.3990625026241	11.8956970500594	18.5342770750959	21.1310227582395	24.0970321253746	0	0	0	0	0	0
ENSG00000021826	11.5916434300618	18.8113636102355	12.1322037749415	23.1800349569433	24.5625337709856	0	0	0	0	0	0	0
ENSG00000021852	0	0	0	0	0	0	0	0	0	0	0	0
ENSG00000022267	0	5.94758995099458	5.94808044695132	0	0	0	0	25.7654021972045	23.1732624348156	17.7577339362242	14.549462154305	0
ENSG00000022277	4.04892520018323	5.45474407405155	5.54720837435328	8.2443020826402	5.2668167542149	0	0	0	0	0	0.493697830684648	0
ENSG00000022355	0	0	0	0	0	0	0	3.65485032211281	14.6528381762284	19.4263473375362	28.2943013310942	0
ENSG00000022556	0	0	0	0	0	0	0	0	0	0	0	0
ENSG00000022840	18.7412287820142	19.4759411477923	16.4620548566836	20.049932928189	14.3509218936968	0	0	0	0	0	0	0
ENSG00000023041	32.8152537814827	33.2321958218207	27.5445776969819	53.3224996393006	26.8256953910664	0	0	0	0	0	0	0
ENSG00000023171	7.518438282957	10.3124706073841	8.27328616003806	0	13.8767454178885	0	0	0	0	0	0	0
ENSG00000023191	26.9219235581166	30.8531347769548	23.2909289453006	25.7835648854397	16.7927382940064	31.741907750246	0	0	4.92739117351823	0	0	0
ENSG00000023228	59.8427000310454	56.5553705700867	47.7846043257226	70.9133199993814	50.5452013455552	63.5749124886052	0	0	0	0	0	0
ENSG00000023287	0	0	0	0	0	0	0	0	0	0	0	0
ENSG00000023318	8.32487262734169	14.4612507798897	14.0092086088291	26.1138021998471	20.2579328085896	0	0	0	0	0	0	0
ENSG00000023330	18.0643712624496	19.9141378040592	22.9407901374764	26.3517838848039	16.6578441708588	0	0	0	0	0	1.4988840805041	0
ENSG00000023445	0	0	0	0	0	0	0	0	0	6.49448379397738	5.48423430806786	0
ENSG00000023572	5.27533019502005	8.1350840216206	7.55066393434425	7.12520955097737	7.08038608930265	0	0	2.74712639707531	10.9557742022016	5.45483712374623	5.97969852769005	0
ENSG00000023608	13.5817488031657	15.6552757823577	18.9653935352423	31.8786526133574	26.3978395124544	0	0	0	0	0	0	0
ENSG00000023697	17.6971210694093	18.3908134954205	15.2020154518531	24.4916396421164	15.4280243986404	0	0	0	0	3.51131008363832	2.9461704789287	0
ENSG00000023734	50.6039125680772	43.2298401330505	40.5350754531856	72.5662877788013	53.8651233708696	108.623137847762	0	0	0	0	0	0
ENSG00000023892	16.9258942224805	11.209545326038	10.8302915055126	0	0	0	0	0	0	0	0	0
ENSG00000023902	18.2511195459397	23.388471211828	19.2084398433045	23.3520102959941	17.7444380360187	0	0	0	7.73191412214751	5.61942728579569	7.80659903775431	0
ENSG00000023909	12.0604642836805	21.5984048444874	18.9231105569263	0	0	0	0	0	4.06435440467345	1.07485552816481	0.673040886721759	0
ENSG00000024048	18.7548575876908	21.5834375661274	17.7126425631002	23.0594016540412	16.8488849411062	26.7053040767057	0	0	0	0	0	0
ENSG00000024526	33.1765476917607	28.8424385623493	24.2091247438848	26.0316549420093	22.7931639875415	42.3384777473817	0	0	0	0	0	0
ENSG00000024862	19.2678226390399	18.6846568851138	16.4107302936713	31.5860439714045	33.456489195376	0	0	0	0	0	0	0
ENSG00000025039	2.73065949840697	19.3757285257764	16.1489471543808	6.70169919889266	7.12458564094636	0	35.8146757073134	8.6735871397074	26.5008690427699	21.5666427928509	21.3166642609043	0
ENSG00000025156	8.56751463861919	11.0820618773862	9.35789237965636	7.28691648279839	10.4017615923803	0	9.41719201400998	2.21345347209015	5.04885505250984	16.3700533966945	9.00158080189346	1.72943780989491
ENSG00000025293	16.135079662398	20.8014086406722	18.1790935449971	17.9798650128793	13.9644177822943	0	0	2.54829721808886	9.16150073089555	9.1595612311291	9.56308691935649	0
ENSG00000025434	35.9892740405304	32.4058621260588	28.4277071334965	51.5525590345755	39.9673682854817	34.6809697030755	0	0	0	0	0	0
ENSG00000025708	0	0	1.85339069538739	0	0	0	216.025705336457	108.427481504308	203.179527698539	111.296218495947	101.503367660651	116.599674378855
ENSG00000025770	10.3057509908476	10.6506275541785	7.17694653621481	11.6811393516119	5.04799921264121	28.6909914646427	0	0	0	0	0	0
ENSG00000025772	14.1698210831944	20.516119288781	20.1610063260131	0	0	0	0	0	0	7.51251922959343	6.71322495968947	0
ENSG00000025796	38.2680674394705	36.4494974438887	33.4349349630974	24.4846235787259	16.3604158222315	18.3693762442726	0	0	0	0	0	0
ENSG00000025800	28.7076518411254	32.823305346753	27.464380703644	34.9022479374741	22.3772653107752	65.8129253093621	0	0	0	0	0	0
ENSG00000026025	0	0	0.0540185005588838	0	0	0	39.7959553998686	17.1222668618562	36.5472572608021	23.7685992699606	23.8264496021216	0
ENSG00000026036	20.4520605147378	27.7992188723789	24.4371907408393	18.9680558344103	9.94311684173349	26.0827195133115	0	0	0	0	0	0
ENSG00000026103	0	0	0	0	0	0	0	0	0	0	0	0
ENSG00000026297	0	1.26865093518668	2.92089048414659	0	0	0	18.3583834971671	10.9575852966776	39.2558178308718	9.41836582592697	9.61113643489406	0
ENSG00000026508	0	2.28777203778106	3.19626240301498	0	0	0	117.312466217265	47.6779175204018	97.3787785888797	80.4964221105105	81.9319291979532	96.4990241390895
ENSG00000026652	31.0686011238596	25.3443101700262	31.8422032740086	112.258051299339	44.7972766954309	47.4535459896005	0	0	0	0	0	0
ENSG00000026751	0	0	0	0	0	0	0	0	0	0	0	0
ENSG00000026950	0	0	0	0	0	0	0	0	0	0	0	0
ENSG00000027001	5.93850970372844	12.6297883762225	12.0155853082955	13.0620353035384	7.73611197514208	0	0	0	0	0	0	0
ENSG00000027644	0	0	0	0	0	0	216.691789211209	87.5795166079091	172.923934914701	108.939948453788	116.89999339875	230.205580145829
ENSG00000027697	17.2020431902775	19.682786294453	16.8542240803761	15.7416799495536	19.7985613190612	0	0	0	0	0	0	0
ENSG00000027869	0	1.87066746617681	0.726016806651726	0	0	0	0	0.250781584212068	6.46701903028613	4.63294922044584	4.74185108475769	0
ENSG00000028116	0	0	0	0	0	0	0	0	0	0	0	0
ENSG00000028203	53.0735487922168	52.1462014024127	40.3066567855677	103.080332258597	61.5250064301151	147.039796587667	0	0	0	0	0	0
ENSG00000028310	0	0	0	0	0	0	0	0	0	0	0	0
ENSG00000028528	10.3236381630649	12.01877973299	14.1375375949928	0.906043563693183	4.08723689858555	0	0	0	0	0	0	0
ENSG00000028839	0.122177863738524	3.26768896098751	2.02927852309458	1.99841065705005	-0.375448460960763	0	0	3.55759300208265	3.56227393216977	7.10147205435224	2.67105812685465	0
ENSG00000029153	0	6.96748777711916	6.89362061794933	0	0	0	77.3861199345127	28.7074927368133	73.4102365832495	47.3351213824815	47.537226377364	0
ENSG00000029363	58.9103311762229	49.9120385582785	44.4291246266421	150.769111844836	81.7917787188132	98.1050324193044	0	0	0	0	0	0
ENSG00000029364	63.4967736441565	45.2524957723384	41.2191199018782	124.170788381632	68.3774107690655	0	0	0	0	0	0	0
ENSG00000029559	0	0	0	0	0	0	0	0	0	0	0	0
ENSG00000029639	21.0574531200051	26.6953643522034	24.9420430728792	53.2055268139955	41.0165297028248	45.8052016576159	0	0	0	0	0	0
ENSG00000029725	10.9775906621752	15.7508934083316	13.3498231885306	0	4.89511762909228	0	0	0	0	0	1.41702747133718	0
ENSG00000029993	0	0	0	0	0	0	0	0	0	3.95742980951688	4.55279167073246	0
ENSG00000030066	45.6720987217192	47.1941902970848	45.4067308149499	86.0225669573755	47.4017014638675	95.6314827557445	0	0	0	0	0	0
ENSG00000030304	0	0	0	0	0	0	0	0	0	0	0	0
ENSG00000030419	19.2851429642784	29.4347856829172	19.6318052672513	0	1.92297810587459	17.7532527936784	0	0	0	6.17583065358196	7.15294564346431	0
ENSG00000030582	2.99928199754228	3.52688732088035	4.01815779565634	0	0	0	0	0	2.83735069266157	2.52042790809313	2.00463896778635	0
ENSG00000031003	0	0	0	0	0	0	0	0	0	0	0	0
ENSG00000031081	0	4.57243718144133	6.27356423548037	0	0	0	0	5.55779015805631	25.4019073405017	35.5326508160238	18.6487020013941	0
ENSG00000031544	0	0	0	0	0	0	0	0	-0.101747597039745	0	0	0
ENSG00000031691	16.7399054206866	14.3392043959492	15.8140949502376	38.2980115775269	15.2758695539732	0	0	0	0	0	0	0
ENSG00000031698	16.815579496345	17.1516982123212	20.1464898587486	30.043441087657	12.9369927713322	22.7503873381427	0	0	0	0	0	0
ENSG00000032219	49.2603151545881	42.8706709021838	35.3739814741099	76.8674525629283	35.5341007258396	103.284918007886	0	0	0	0	0	0
ENSG00000032389	31.1552465724533	28.5561033395546	30.8030728622646	35.4305533781097	40.92070648047	96.1121523098472	0	0	0	0	0	0
ENSG00000032444	14.5227122637103	18.2626600986562	14.3079120296355	28.948031699937	29.1664019066596	0	0	0	0	0	0	0
ENSG00000032742	22.0140758402858	28.4316647464467	19.3860505207746	22.8646953651028	19.1081235631858	24.4192643554821	0	0	0	0	0	0
ENSG00000033030	26.8948751071961	26.0812488148501	24.662450790047	68.0617000143154	41.3222928699227	56.4906148957604	0	0	0	0	0	0
ENSG00000033050	28.2319532651847	43.0456031077751	42.0025946803618	63.4799451353477	58.8567081681944	58.6128528389023	0	0	0	0	0	0
ENSG00000033100	11.4149740670605	18.8922721875411	18.407694056695	21.1986129214596	21.5490710185397	0	0	0	0	0	0	0
ENSG00000033122	0	0	1.30332668564597	0	0	0	103.614268479257	42.1285801871828	86.8317745701001	75.8179987711578	84.1641225279368	100.276164289729
ENSG00000033327	3.11519480791902	6.74231875932477	2.64007974911905	0	0	0	0	18.0237195236527	48.3968042294552	54.2649662994817	46.7933484554241	0
ENSG00000033627	6.11470464894556	6.10617257776416	5.54720837435328	0	7.82378433954788	0	0	0	0	0	0	0
ENSG00000033800	22.8620187138641	29.8216158146513	24.117615793332	-0.780238002891891	16.7920430587496	0	0	0	0	7.0188339133983	3.3564151624702	0
ENSG00000033867	24.6933672914192	29.7029770381741	29.5736718984499	12.4870864268624	17.9190560259487	19.6210064838609	0	0	0	0	0	0
ENSG00000034053	0	0	1.25789902379237	0	0	0	0	0	0	0	0	0
ENSG00000034063	26.7934367729068	26.509665424137	27.0364196393901	0	0	0	0	0	4.97901469679475	0	4.43052879663796	0
ENSG00000034152	10.4830796300222	12.5085187158122	11.0115154243965	0	0	0	0	0	11.1220861208718	5.54239579662271	18.3886956524654	0
ENSG00000034239	0	0	0	0	0	0	49.300846569496	21.5301137598164	50.460205900597	72.3873707674466	59.368647616777	0
ENSG00000034533	-0.26562510113675	0.123030752500515	-0.108441783870641	5.9437550672279	6.62574158919962	0	0	0	0	2.31090990807438	0	0
ENSG00000034677	0	0	0	0	0	0	0	0	0	0	2.10666563023373	0
ENSG00000034693	10.6176743030792	14.2521408077775	13.8246920136679	17.5871598824838	10.6213058728356	0	0	0	0	0	0	0
ENSG00000034713	13.6910177302695	13.7172638230731	11.748981153152	0	0	0	0	0	0	0	0	0
ENSG00000034971	1.03345657135991	1.18081062348475	0.308625217361087	0	0	0	0	0	0	0	0	0
ENSG00000035115	18.4024676972565	16.7684610638656	15.289578099283	27.2123579170505	15.1874704506857	0	0	0	0.585103466877904	0.407325547688038	0.0539771469098136	0
ENSG00000035141	23.0629796386582	35.1960521198868	28.274747498967	40.1166419783323	22.9415275457615	58.0938099160377	0	0	0	0	0	0
ENSG00000035403	62.1262746971849	41.5561836326228	37.3214906351594	85.4075932909949	53.7129685262023	72.1402466037473	0	0	0	0	0	0
ENSG00000035499	36.7789549066553	38.1163598999142	29.5825764702207	55.9775871250782	40.1427130142933	37.4921929752937	0	0	0	2.3392116696763	1.64697668703155	0
ENSG00000035681	28.0779792889366	34.850663343549	27.4470582886328	36.806750729928	20.5202231629254	15.2793725774126	0	0	0	4.28772386803194	1.80911761594753	0
ENSG00000035687	31.870022276769	42.55445622554	39.2875139326938	23.4825822772025	34.9528260649002	32.5825897973636	0	0	0	0	0	0
ENSG00000035720	0	0	0	0	0	0	0	0	0	0	0	0
ENSG00000035928	19.3931903024989	18.9909379302603	15.3373478650401	18.1313035374706	17.0887121501793	0	0	0	0	8.65857811790071	6.21557537475666	0
ENSG00000036054	4.53647661065325	9.94089439085135	8.78936228306511	16.1857271160978	0	0	0	0	0	0	0	0
ENSG00000036448	0	0	0	0	0	0	0	0	0	4.66124039577717	4.8007332687301	0
ENSG00000036549	69.04631916019	67.8902940023284	54.2894709161547	115.185400301082	83.7982224351107	133.529135405008	0	0	0	0	0	0
ENSG00000036565	0	0	0	0	0	0	0	0	0	0	0	0
ENSG00000036672	0	5.60554938654921	3.50910798433988	9.44295428828624	6.79635932858583	0	0	7.32092026569523	19.8630155082965	12.4514177653681	13.3184956255593	0
ENSG00000037042	2.20094096879811	6.36580989521897	7.08094316085729	0	0	0	0	0	2.61515429307867	0	0.0739454063371662	0
ENSG00000037280	0	0	0	0	0	0	131.904653294686	42.2324646962765	94.288729131083	45.766781471743	45.2047727738706	60.4264352391956
ENSG00000037474	37.9884576974961	42.6264125009821	34.6320879149368	38.1208130988128	21.9419542442576	0	0	0	0	0	1.309853679186	0
ENSG00000037637	42.029438307775	35.3069729776629	35.1761401941141	19.6122959778398	12.7196287075218	0	0	0	0	0	0	0
ENSG00000037749	6.89685904640869	9.00806015289851	11.2915715510719	0	5.37695226388338	29.936160591431	0	0	0	0	0	0
ENSG00000037897	17.9738368841852	19.9735227900256	17.0251518959594	53.2867381124604	23.270728174331	76.3309524845661	0	0	2.74072334581344	2.87781210180817	3.78362610597186	0
ENSG00000037965	0	0	0	0	0	0	369.264865451425	142.98737212377	257.175958671869	227.989345313853	199.181262392589	462.332156492932
ENSG00000038002	26.7267734776195	33.3153745001658	24.1079733168769	61.7116323168994	39.4435143156918	54.6393192428888	0	0	0	0	0	0
ENSG00000038210	15.7486159684655	17.9865846537096	17.79366562735	19.7431976879716	20.3883512468759	62.093875966308	0	0	0	0	0	0
ENSG00000038274	81.8464412492389	74.4898744313933	58.5118432594798	167.742836805579	85.7029441497055	119.829659988857	0	0	0	0	0	0
ENSG00000038295	0	3.52766404441055	6.41218932494471	0	0	0	55.0516951309976	16.901438703348	41.1536186944806	85.4951691918827	81.3482694557522	82.096050176052
ENSG00000038358	23.2041601034468	28.0227267808596	27.8936133808602	15.8888782948347	0	0	0	0	0	0	0	0
ENSG00000038427	40.9624747798956	47.6118288650443	69.388003386002	94.6195493807066	68.0251688105932	179.046480533703	0	0	0	0	0	0
ENSG00000038532	5.66988720459313	8.75075300603429	7.85928915170533	0	7.95420277783414	15.5316980102325	0	0	7.51483797275622	2.56420724453137	3.48552297165376	0
ENSG00000038945	0	0	0	0	0	0	0	0	0	0	0	0
ENSG00000039068	29.5233123176118	32.3519372320286	23.0212264066113	0	10.1546647501272	0	0	0	0	7.09312736516817	6.71961900908957	0
ENSG00000039123	38.5772455502398	34.1650287675979	32.0669994793731	53.8908405863439	43.6162433620382	0	0	0	0	0	0	0
ENSG00000039139	0	0	0	0	0	0	0	0	0	0	0	0
ENSG00000039319	26.8850812506193	29.8133624901917	25.7821885682183	27.6396613342377	26.4361446566839	28.2047041067893	0	0	0	0	0	0
ENSG00000039560	21.5866048026352	25.6661357647465	27.312189719289	17.0327478202672	13.3304283028359	65.1738827086569	0	0	0	0	0	0
ENSG00000039600	0	0	0	0	0	0	162.19671121154	59.4525642478799	130.732578384654	46.734938678257	44.933120650384	0
ENSG00000039650	53.4923129925053	49.9003776263556	48.9450855579405	49.3451791929391	45.4964753940324	103.203642624212	0	0	0	0	0	0
ENSG00000040199	12.5066919596457	23.352711692529	18.925113925039	0	9.13523611122676	0	0	2.18204616610305	9.67535896628588	12.6991383092544	9.58503105590792	0
ENSG00000040341	20.056936658186	22.3926719730794	18.4628833071059	35.1845881721973	31.3357032154271	94.3530670016284	0	0	0	5.14615429984626	6.39549919778937	0
ENSG00000040487	7.93727523945163	12.9733823877283	9.76064271231468	0	0	0	0	7.21123820192213	33.9170807378175	10.2380020795508	8.06837177562052	0
ENSG00000040531	31.2773535037326	35.0694017945253	28.1444102763084	0	20.584384545937	30.1453650613284	0	0	0	0	0	0
ENSG00000040608	2.88953411838555	0	0	0	0	0	0	0	0	0	-0.291620382913963	0
ENSG00000040633	53.5562098217973	62.4629589016837	47.8243135046941	49.3759844146282	44.9269683948355	20.9841093084037	0	0	0	0	0	0
ENSG00000040731	0	0	0	0	0	0	0	0	0	3.37941520711552	5.8379448345745	0
ENSG00000040933	6.88819888378943	8.72665441865827	9.72926767388227	0	2.97213952321769	0	0	0	0	0	0	0
ENSG00000041353	0	1.75838991800892	1.75384678406142	0	0	0	0	3.79128202832794	8.77321154823997	12.0374364578082	9.50734338350913	0
ENSG00000041357	20.5277345903962	22.6639702224571	18.4717878788767	39.196374317845	19.5362709647254	0	0	0	0	0	0	0
ENSG00000041515	0	0	0	0	0	0	0	0	11.1474682362323	53.5447610560063	29.1028760628582	0
ENSG00000041802	19.5572658517545	19.5125473609846	19.3861851064392	75.1294924656423	30.0571648621152	0	0	0	0	3.98055541728113	2.44392682103141	0
ENSG00000041982	0	0	0	0	0	0	40.0423697273395	19.4676155998386	41.4301389153107	45.8377140682522	48.6464074724215	54.5211261538159
ENSG00000041988	11.4154484848447	14.0173788012289	12.3916448103284	0	5.28855316059594	0	0	0	0	0	0	0
ENSG00000042062	0	3.37374175882216	2.14256737798585	7.40754978570051	0	0	0	0	6.40229531517618	8.83923748910947	11.0601969165896	0
ENSG00000042088	20.1435382843787	35.1359526954402	28.7663158577602	44.2245689228583	24.1922881236262	25.2242675544085	0	0	0	0	0	0
ENSG00000042286	6.91361252466848	11.9068408339121	10.3970938221084	0	4.80744526468648	0	0	4.42376465965884	20.4870820458468	20.928222777644	19.7936583728716	0
ENSG00000042304	0	0	0	0	0	0	0	0	0	0	0	0
ENSG00000042317	0	1.84971983485488	1.69287883407821	11.2789400137437	0	0	0	0	7.60712928259853	6.46074702552455	4.81953080052435	0
ENSG00000042429	22.803782787874	25.3318725145731	24.2381576784136	51.4524625461329	34.1332247487148	53.3776920787895	0	0	0	0	0	0
ENSG00000042445	4.41224264115174	5.1243644415291	7.14276555003562	7.25611126110921	9.96485324811453	0	0	0	0	0	0	0
ENSG00000042753	28.515837111606	29.1899161915061	25.2974874836236	33.0978416334629	34.8758962600784	75.0008439878983	0	0	0.807299866460801	0	0.0539771469098136	0
ENSG00000042781	0	0	0	0	0	0	0	0	0	0	0	0
ENSG00000042813	0	0	0	0	0	0	0	0	0	0	0	0
ENSG00000042832	0	0	0	0	0	0	0	0	0	0	0	0
ENSG00000042980	2.23444792531768	0	0	0	0	0	0	0	0	0	0	0
ENSG00000043039	0	0	0	0	0	0	163.164065686141	68.0998188843482	138.988372106977	124.6732524369	124.93809855295	146.130885206854
ENSG00000043093	0	0	0	0	0	0	0	0	0	0	0	0
ENSG00000043143	59.3366092854297	58.0238530874251	53.0836447799665	31.9922291699876	41.1812761105972	179.281340312425	0	0	0	6.14359961917632	9.95781155248626	0
ENSG00000043355	106.654815500562	111.748812828573	102.161648438213	57.6202864972684	51.1335377956066	44.0882977398098	0	0	0	0	1.15941597590568	0
ENSG00000043462	0	0	0	0	0	0	0	0	0	0	0	0
ENSG00000043514	9.1890938751675	15.6638298201598	12.0015326848743	33.2698169725137	12.0849124891818	0	0	0	0	0	0	0
ENSG00000043591	0	0	0	0	0	0	212.687592526036	74.1673689967404	145.82972083553	107.157697019106	96.34909806839	99.033731369718
ENSG00000044012	0	0	0	0	0	0	0	0	0	0	0	0
ENSG00000044090	54.7258563363708	38.3092216079609	36.5532331134225	27.6980294923033	16.9702014245849	14.5456744165091	0	0	0	0	0	0
ENSG00000044115	30.6324438421264	29.8164693843125	22.7226958792946	24.9741728537248	19.5145345583444	22.4816038680119	0	0	0	0	0	0
ENSG00000044459	22.7032619183153	30.3419678864336	25.4248658974136	11.7196253966762	27.9056456804442	0	0	0	0	11.6035145172573	13.0966594065478	0
ENSG00000044524	0	0	0	0	0	0	0	9.43942906789259	23.8618932939963	40.6738199576224	31.0934744025894	0
ENSG00000044574	41.0462421711945	42.5512061478411	36.513184022096	49.3349107857093	41.7809376205695	45.9725094673032	0	0	0	0	0	0
ENSG00000046604	41.4818326059489	42.6141711486369	34.1481854273365	26.6784826692934	24.7371517609155	25.7124603827372	0	0	3.89734932425744	6.19799875540512	6.43564520483062	0
ENSG00000046647	18.4019008502778	17.0039997939444	20.0106707170311	85.5384950011268	17.0010397857735	34.2613364605684	0	31.6418532035162	0	0	0	0
ENSG00000046651	26.5221120335941	23.2695627563148	22.1724691894869	80.0127188506284	34.6695659787203	27.6495259858426	0	30.5889622271735	0	0	0	0
ENSG00000046653	32.7520329950617	44.4785294103403	40.283263329674	96.3824811477722	32.7158022438518	63.1749879382522	0	28.3223734528208	0	0	0	0
ENSG00000046889	12.8342350561796	21.7357963256855	18.9185743418589	51.5217538128864	31.0524031935919	0	0	0	7.01790114760626	0	3.50965247351581	0
ENSG00000047056	40.6262715207423	41.4722269385718	41.241766795398	45.5259052008016	25.3276684276119	79.7127370249209	0	0	0	0	0	0
ENSG00000047188	14.3200839021495	16.3844176611278	12.9894921611777	13.0037559268882	8.05935116752265	0	0	0	0	0	0.919737293192039	0
ENSG00000047249	14.6799449365893	16.7566265707454	13.5910483497662	21.5243239013578	17.1527394410032	0	0	0	0	0	0	0
ENSG00000047315	19.6629464955917	20.6653711542183	20.1375852869777	36.968457661749	27.140511023818	21.7410856068633	0	0	0	0	0	0
ENSG00000047346	13.9807822025658	14.2770652747597	13.4571533728281	0	7.74892719758846	0	0	0	0	2.57419270630794	1.91233362836772	0
ENSG00000047410	42.5112658724013	42.5038536558242	35.9985940656574	66.6526481743916	48.0365544230705	56.6459645202358	0	0	0	0	0	0
ENSG00000047457	0	0	0	0	6.94924091213476	0	0	0	0	0	0	0
ENSG00000047578	10.256057403047	18.536958466737	15.1355088548677	21.4064338746213	13.9419546370316	0	0	0	0	0	0	0
ENSG00000047579	2.14202037139949	5.57912062858261	6.09514626434329	0	0	0	0	7.53448683856199	16.6983803640838	27.946971521089	22.8993654390325	0
ENSG00000047597	0	0	2.20717283022365	0	0	0	0	26.6948009619361	10.2384207727318	10.233016921303	10.8181829499642	0
ENSG00000047617	10.3392579473672	12.6647711719912	10.0102514882442	0	0	0	0	6.24656709475049	15.5535555456885	23.272419605568	16.6940884262694	0
ENSG00000047621	29.0363286316168	24.1774906490549	19.5039630096181	80.903005526509	41.4976375987343	0	0	0	0	0	0	0
ENSG00000047648	0	3.47713669906793	3.51798967142347	0	0	0	37.5284387686275	56.3027046900838	54.7379090094752	96.333910842866	50.7307099897307	49.3328127241311
ENSG00000047662	0	0	2.07230426087989	0	0	0	140.97082065236	53.2477898021804	111.000471314881	103.991636468726	90.1297804275717	95.2067498284725
ENSG00000047849	30.8253922656033	42.5037856966193	34.770583913709	48.2876971046546	25.7421136266149	61.7236168357337	0	0	0	0	0	0
ENSG00000047932	22.3832452904431	24.4721107622785	20.9735333030403	0	26.5072482832412	25.5780686476718	0	0	0	0	0	0
ENSG00000047936	0	0	0	0	0	0	0	0	0	0	0	0
ENSG00000048028	28.4650098298479	28.8937426312221	23.9019139427407	41.0803402958394	27.5339465553216	16.2722162713811	0	0	0	0	0	0
ENSG00000048052	0	0	0	0	0	0	63.4119636400011	26.1874605401901	63.1210515797966	52.9063410407993	61.7187278889207	0
ENSG00000048140	14.2466288528103	24.8685622897174	22.562064167012	7.67962161319392	11.7132133640592	33.907535367305	0	0	0	0	0.293805748224583	0
ENSG00000048162	34.7969428491919	42.8613708106386	42.2753334576691	81.2957106569045	51.5277000659919	69.8172161598579	0	0	0	0	0	0
ENSG00000048342	6.01531747334435	6.84699484023909	8.03163138350561	16.4577989435912	12.5218208334475	0	0	0	0	0	0	0
ENSG00000048392	23.9120913397465	22.2607457975953	17.4994244401871	9.24671014657454	26.0234766136095	56.3982344536624	0	0	0	0	0	0
ENSG00000048405	0	0	0	0	0	0	0	0	0	0	0	0
ENSG00000048462	0	0	0	0	0	0	0	0	0	0	0	0
ENSG00000048471	0	0	0	0	0	0	0	0	0	0	0	0
ENSG00000048540	8.05316862935206	21.1891248222126	23.356029921401	0	13.081576103383	0	0	0	0	15.4357817703043	12.7657726965264	0
ENSG00000048545	0	1.94262457921491	1.76555730357908	0	2.70984916888191	0	0	0	0	0	2.08274561655822	0
ENSG00000048649	74.2043358437592	72.1181456995613	61.8340696600677	59.1423525665565	42.3707275483841	105.274347635282	0	0	0	0	0	0
ENSG00000048707	4.02351155930418	9.06947170663384	8.43952976781424	0	0	0	0	0	0	0	0	0
ENSG00000048740	0	0	0	0	0	0	0	0	0	0	0	0
ENSG00000048991	41.3986320616287	44.6516366302954	38.2515637665192	94.5297212994937	50.6321469710794	64.4498224848193	0	0	0	0	0	0
ENSG00000049089	0	0	0	0	0	0	160.037654445163	58.1723745769743	117.868981954058	59.0882705870451	67.1187184286579	106.46911270257
ENSG00000049130	0	3.78497119127477	4.34925347967895	0	0	0	0	11.1416770817838	26.2107678666281	11.9005564230376	12.0574719635793	0
ENSG00000049167	1.74689651484766	5.40887706989012	4.97399406995497	5.7648504135103	4.78570885830544	0	0	2.81767108195541	7.09248683402241	9.01104027823893	8.25006198759077	0
ENSG00000049192	45.5076115531681	31.5888504048349	32.1793975820553	54.1911300516719	27.8846360129448	46.3427685978775	0	0	0	4.57368172290069	7.30873996463496	0
ENSG00000049245	9.86036669951641	14.9369986601984	12.871661687116	0	17.2633301401092	0	0	0	0	0	0	0
ENSG00000049246	10.8603163143567	16.0579511770082	13.7076097031786	0	0	0	0	0	0	6.84196079606788	6.37948269261018	0
ENSG00000049247	4.50112728686362	0	0	0	0	0	0	0	0	0	0	0
ENSG00000049283	7.60390621519217	18.312293866081	17.8213070303492	0	0	0	0	2.31419569666236	13.5168238096306	28.3975195380072	33.5396004430881	0
ENSG00000049323	9.77659930821748	11.4365400972847	9.4056621454135	0	0	0	0	0	4.82331819799837	3.47861479811165	3.25973499839409	0
ENSG00000049449	0	0	6.03708039528553	0	0	0	240.440563159031	95.0299311340057	185.317756430771	123.176401989879	132.104875336283	185.961398070172
ENSG00000049540	4.61215068631166	5.76723890743958	8.22551639428093	0	0	0	0	0	6.72111906160722	6.35649002479072	8.51994772213984	0
ENSG00000049541	25.1707007591328	28.3741792344855	29.2024090752948	31.7580193104553	25.2392693243244	0	0	0	0	0	0	0
ENSG00000049656	12.0385281900398	16.2134546490961	15.8665192773583	0	8.68415640875753	0	0	0	0	0	0	0
ENSG00000049759	20.862804155592	21.8391912659312	16.1142794396711	0	0	0	0	0	0	5.4714632001136	7.68065236163141	0
ENSG00000049768	0	0	0	0	0	0	0	0	0	0	0.607579755876519	0
ENSG00000049860	17.303130906815	31.5989578896974	32.1409962319123	0	6.86156854772896	17.7697108309893	0	0	0.274740425567059	13.2594131008723	15.413096504862	0
ENSG00000049883	24.8967506687762	37.8311838362435	33.7351352315653	54.7953508339267	38.8588745084231	59.2461179169794	0	0	0	0	0	0
ENSG00000050030	0	2.07710861860847	2.74620614844278	0	0	0	0	11.5207330094234	25.3271025184881	19.3648680251532	21.3763595509998	0
ENSG00000050130	14.9005813519207	22.6289874266884	22.5096101934478	39.2656655845985	28.2556083991858	0	0	0	0	0	0	0
ENSG00000050327	0	0	0	0	0	0	0	0	0	0	0	0
ENSG00000050344	87.5492685633729	51.2366639824891	54.6056197226625	51.7245343736263	35.5098857395368	95.093585262777	0	0	0	1.87092384197459	5.7321759060655	0
ENSG00000050393	27.6158415193456	35.118854698806	29.7291555590822	23.231376993092	23.6437907919287	18.3758373570725	0	0	0	0	0	0
ENSG00000050405	7.52709844557626	10.1725495032792	6.04549823852587	0	0	0	0	0	0	10.2657122068297	5.38220764562048	0
ENSG00000050426	23.1491289579713	24.5421495332126	24.1775597386384	15.6942749880727	17.2581169662947	0	0	0	0	0	0	0
ENSG00000050438	17.1766295493985	16.8547479285071	19.5451703075079	23.9064223582106	23.6879903435724	30.7095949272016	0	3.14285223682174	6.6972976059122	5.55347984753429	7.39891136433786	0
ENSG00000050555	0	0	0	0	0	0	0	0	0	0	0	0
ENSG00000050628	0	0	0	0	0	0	97.1887089194554	38.8042914354129	115.915296609536	48.3592557107614	48.4484912670855	0
ENSG00000050730	0	0	0	0	0	0	0	0	0	0	0	0
ENSG00000050748	10.3987453917445	17.6647590589893	13.6551557296144	0	8.85048261162831	23.3565138642259	0	0	1.88421990829705	0	0	0
ENSG00000050767	0	4.31202314045632	2.97334445771079	0	0	0	60.1597260421844	22.4942654662764	62.7410039666637	34.7451529807186	37.51861175724	40.8045226430843
ENSG00000050820	13.2703923379128	16.4994929850784	16.0655819862275	5.90602053087187	5.79067072400482	0	0	0	0	0	1.78477862589893	0
ENSG00000051009	12.5910261979234	15.5285690572361	14.2129258790617	29.8432481107717	5.98775185919746	32.5279745054512	0	0	0	0	0.0739454063371662	0
ENSG00000051108	28.1207132550541	27.92359542691	25.965777475693	42.5716011434383	21.8968841537474	0	0	0	0	0	0	0
ENSG00000051180	29.9092100420619	29.3959192694975	28.010904177417	25.7903883362051	19.6674161418933	53.7973253212967	0	0	0	0	0	0
ENSG00000051341	16.3766499356984	18.6946941995033	16.3910583123585	6.29485202040817	22.3162053758505	0	0	0	0	0	0	0
ENSG00000051382	37.963759629332	39.5544776702631	33.3239479307916	50.0818350014361	30.4394233816329	75.1023196483418	0	0	0	0	0	0
ENSG00000051523	21.5282510522153	20.1118904470701	18.4886464500447	0	6.81809573496687	38.2491692737533	0	0	0	0	0	0
ENSG00000051620	11.834852288318	9.99064501266377	12.45393104335	13.4855456556231	17.2850665464903	20.7317838755838	0	0	10.1299922658349	0	2.23458818348071	0
ENSG00000051825	0	0	0	0	0	0	0	0	0	0	0	0
ENSG00000052344	47.9662474705672	42.5931794553816	41.1986812374479	32.3919910466551	34.7889506345542	0	0	0	0	0	0	0
ENSG00000052723	15.2529712423549	13.1832690833707	13.7652117283931	0	9.24391814313197	27.8325395057396	0	0	0	8.10273161732252	6.08962869863376	0
ENSG00000052749	6.53403940735365	10.5366035469955	11.9180012875764	47.1941410590519	0	0	0	0	0	0	0	0
ENSG00000052795	5.66122704197386	14.126210806186	9.93532704801849	10.1590732823238	11.3632506453176	0	0	3.92343155888724	6.89589168539756	16.6670953024748	9.93302343922886	0
ENSG00000052802	23.3797271513887	47.519876960946	47.0981541541553	70.1354678315843	72.7324647249238	17.024734476235	0	0	0	0	0	0
ENSG00000052841	15.3956592310525	26.437280481809	21.5800009059313	47.8436499381104	31.4458387250956	0	0	0	0	0	0	0
ENSG00000053108	0	0	0	0	0	0	116.366866138524	42.9258294213551	92.1671712082257	69.5806489703541	67.962175031601	85.7542913582643
ENSG00000053328	0	0	0	0	0	0	54.4942275173476	19.9094861394525	54.0782198561812	49.8400369486234	48.5364773014778	0
ENSG00000053371	7.93727523945163	12.9733823877283	9.76064271231468	0	0	0	0	7.21123820192213	33.73562720417	10.2380020795508	7.84653555660902	0
ENSG00000053372	39.4506938076636	39.237312416724	35.5695221111583	70.6925902080366	32.6029554354622	28.9433168974625	0	0	0	0	0	0
ENSG00000053438	10.0531667671398	14.6611261328574	10.0612857321871	0	8.10045030396391	0	0	0	0	5.59094981179809	0	0
ENSG00000053501	40.7745334665909	47.4149304356854	40.5416217344117	80.6641591431485	54.4294657081508	71.1730380288733	0	0	0	0	0	0
ENSG00000053524	0	4.33845189842293	4.05187493799228	0	0	0	39.8133218918433	15.0349111009789	49.6926135474914	17.5754039633912	16.861947498371	0
ENSG00000053702	0	3.08612223634034	3.500203412569	0	0	0	0	4.60399140831203	16.8357505768673	0	8.25817498427364	0
ENSG00000053747	0	2.66712556858575	1.35109645140311	0	0	0	135.254561870516	50.3018342261187	115.665938299329	71.2487453392968	76.1740668892746	0
ENSG00000053770	35.8471528988116	42.3529803841216	37.9513792770858	52.2378728069239	37.4763366581735	71.9043792082384	0	0	0	0	0	0
ENSG00000053900	16.9161003659037	19.3057629342389	17.0162702088758	15.3695116336176	10.1836707896882	0	0	0	0	0	0	0
ENSG00000054116	7.78649393511356	14.2303723909921	13.9745637788066	50.3718560595344	27.8839092740632	57.1625735710874	0	2.20064859643631	6.65499408031126	0	0.857497230998235	6.74901088054633
ENSG00000054148	34.0321087769673	49.1307964353234	37.8834582638833	0	24.2835006796245	133.004950983018	0	0	6.29876792287341	0	2.7968639430213	0
ENSG00000054219	0	0	0	0	0	0	0	6.80584977104332	61.3385792685393	30.0606307487022	20.4892241631403	0
ENSG00000054267	100.785682096971	98.5880131801784	82.998214355352	106.290215429454	82.1207255562477	150.684145994885	0	0	0	0	0	0
ENSG00000054277	0	0	0	0	0	0	0	0	0	0	0	0
ENSG00000054282	28.1963873307126	43.4342897639815	39.44717655729	58.2953318623871	42.28378192286	57.7357840225487	0	0	0	0	0	0
ENSG00000054392	2.37945270395451	4.75844519543258	3.69291105184126	0	0	0	33.3667567534395	15.0890872411182	46.0707386291185	57.8472729720043	53.4809134226357	70.9851149142791
ENSG00000054523	22.5402984012825	33.758472536245	31.2875507697396	41.1450973537813	28.4058784027381	0	0	0	2.85709982446768	0	0	0
ENSG00000054611	37.8037513153959	35.5261904346376	30.9561433882854	44.8405914284532	33.5861808947806	18.1399699615636	0	0	0	0	0	0
ENSG00000054654	6.28393997247966	15.848841204896	12.4998225490469	0	0	0	0	4.12805829255312	19.2320489252916	10.7500692436907	14.2438011433359	0
ENSG00000054690	8.39997985602134	13.2571182925591	9.99714943719682	0	6.42466020346321	0	0	1.92934221434329	16.3218923414769	5.75686418777428	8.36612927809326	0
ENSG00000054796	0	0	0	0	0	0	0	0	0	4.66124039577717	4.26709891919074	0
ENSG00000054965	21.2752483373823	30.7376426903424	24.2639208213525	21.9711143440676	34.87662299896	58.122501190434	0	0	0	0	0	0
ENSG00000054967	1.93288531664155	4.95412088283661	4.92668814804108	0	0	0	0	3.5052382523546	15.9282637730323	9.99028153566447	8.14429305908176	0
ENSG00000054983	11.8081334416684	18.687212480085	15.7117263237981	32.9176468691684	14.6450210563152	0	0	0	0	0	0.836740902608437	0
ENSG00000055044	44.161097975619	37.2838036291164	32.2739865411958	67.5688983954772	39.2029603677371	27.8160814684287	0	0	0	0	0	0
ENSG00000055070	42.029438307775	35.3069729776629	35.1761401941141	19.6122959778398	12.7196287075218	0	0	0	0	0	0	0
ENSG00000055130	22.3399950789955	29.3297778867329	29.7089938252751	22.8830704720548	35.5835383262721	0	0	0	0	2.07516195197328	2.76585686777828	0
ENSG00000055147	6.89685904640869	9.00806015289851	11.2915715510719	0	5.37695226388338	29.936160591431	0	0	0	0	0	0
ENSG00000055163	4.82325878584223	12.728294821073	9.66228514276302	0	0	0	0	0	3.4422000472396	0	3.93809413480519	0
ENSG00000055208	0	0	0	0	0	0	0	0	0	0	0	0
ENSG00000055211	15.4880867849707	19.2738971115609	16.2149670228357	11.3987991168888	9.85544447732769	0	0	0	0	3.26414640696009	2.10250438779903	0
ENSG00000055332	10.5165865865418	14.5584218529239	14.2780180598301	0	4.15244611772867	0	0	0	0	0	2.16854628563987	0
ENSG00000055483	20.8887846434498	37.2713659736633	27.7561473498371	30.2154164267078	13.6586546151964	0	0	0	0	0	0	0
ENSG00000055813	0	0	0	0	0	0	195.727354277959	65.8825003758051	150.59359496209	78.9336242252278	75.7663792158582	102.69197255193
ENSG00000055917	19.8403086162376	24.8529506594031	22.9329256935865	58.8489456840012	54.1707552833388	32.2392917547835	0	0	0	0	0	0
ENSG00000055950	34.9053211546877	40.9783890939183	34.4297833313458	36.2515123262072	33.0578857628716	54.8457546993464	0	0	0	0	0	0
ENSG00000055955	9.71128593611459	1.25388310914298	7.20270967915366	0	0	0	0	0	0	0	0	0
ENSG00000055957	2.6236513568991	0	0	0	0	0	0	0	0	0	0	0
ENSG00000056097	9.86150039347391	11.3292615393879	13.265994176534	8.0928635580489	11.5603317805102	0	0	0	5.92740015045821	10.7118319327083	10.7962388134128	0
ENSG00000056277	17.3857646041564	18.2299006980603	16.1217695952249	23.5239856350448	13.4173739283601	0	0	20.8311548312782	0	0	0.443672438022997	0
ENSG00000056291	0	0	0	0	0	0	0	0	6.19702032583367	7.48536596952256	0	0
ENSG00000056558	15.0848696127783	18.7833814052085	15.991121389845	0	5.46317115052591	0	0	0	0	0	4.22518652321196	0
ENSG00000056586	43.2968767277932	35.2074717340381	30.3520178892979	46.5936556963158	36.406165573331	0	0	0	0	0	0	0
ENSG00000056736	10.4657593047837	16.5741189177971	16.2547827891957	0	0	0	0	9.1809275614534	21.6639698894598	24.3580730810696	28.4413191600718	0
ENSG00000056998	10.1965699586696	14.4371521925137	12.3106217460786	0	0	0	0	14.946486737697	0	2.64678075916014	2.40442313270648	0
ENSG00000057252	0	3.48046131437333	5.1690604494626	0	0	0	36.5660120867298	10.0809429084311	35.2455430775533	25.3676811636493	25.9249702791093	58.2031085421128
ENSG00000057294	10.2057969682676	9.05703405118073	9.64170502645239	7.82079173055549	0	0	0	3.72266986167432	0	15.5720283776858	11.8556040039952	0
ENSG00000057468	3.65436819061015	4.89037915851069	4.88782295405483	6.96350261915635	0	0	0	0	0	0	0	0
ENSG00000057593	5.44343182459665	2.87701226422814	4.49068451689007	0	0	0	22.3561791993752	4.84316773248646	16.0266709151435	0	0.145914935550251	0
ENSG00000057608	0	0	0	0	0	16.2722162713811	0	0	0	0	0	0
ENSG00000057657	0	0	1.49677529751379	0	0	0	0	7.16928955369338	16.9918481266423	30.6951281491022	22.8280059754393	0
ENSG00000057663	23.2150932757069	19.7434211246581	17.220915166795	40.6979035726736	27.3158557526296	34.2777944978793	0	0	0	0	0	0
ENSG00000057757	12.9272294570766	16.8928376183966	17.0747999217768	24.9048815869713	20.64991486233	0	0	0	0	0	0	0
ENSG00000057935	4.12516612282039	35.2976422163306	25.1476386031722	0	0	0	87.6077322575294	7.93021267830842	31.1645562319553	15.6113794230844	14.3236741810453	0
ENSG00000058056	19.7235337860539	24.9718057858386	25.3546794323121	26.7344010881646	16.8637981031366	39.8735869217093	0	0	0.79151430197187	5.50601612739222	3.23719257149627	0
ENSG00000058063	6.72009725421283	12.8272374164118	10.3666464713624	0	5.94427904643538	0	0	4.02538354975444	13.1826393126247	22.1673823642835	19.1222220844648	0
ENSG00000058085	7.15682138292474	9.98831484207317	8.03255907119211	12.4973548340921	7.84552074592893	0	0	0	0	8.52612637416984	10.3766958772519	0
ENSG00000058091	0	0	0	0	0	0	0	0	0	0	0	0
ENSG00000058262	23.3848875507277	24.0730282138575	20.8287194737002	20.4481699394595	13.1438025121274	0	0	0	0	0	0.330645698772736	0
ENSG00000058272	50.6792888127416	49.3665228312735	39.5546478719774	70.8321771714622	30.8858449183554	110.131037131186	0	0	0	0	0	0
ENSG00000058404	0	0	0	0	0	0	0	0	0	0	1.24324076786326	0
ENSG00000058600	17.4955124833131	25.9825242947555	22.692712372392	18.241668433143	16.127223097242	0	0	0	0	0	0	0
ENSG00000058668	15.6492287928643	16.0354060366926	13.4355304605875	17.6769879636967	0	51.0546616349001	0	0.713899673638357	3.75997911147391	3.42319454355376	4.45690212784386	0
ENSG00000058673	52.4886559240059	36.1847397475764	29.1837980931185	64.1331354437636	43.1099308376213	52.3477955383555	0	0	0	0	0	0
ENSG00000058729	28.0277188541572	26.4124051709028	22.9938474341992	49.6069826132027	27.7310276905143	0	0	0	0	5.3556375327501	5.68589277946547	0
ENSG00000058799	1.62062107015107	1.46175710705797	4.68966087348878	0	0	0	0	0	0	0	0	0
ENSG00000058866	0	0	0	0	0	0	170.318128972795	67.7874426051357	132.957663699814	112.848613768619	102.888326836419	108.804454370776
ENSG00000059122	0	3.96842912895056	2.79163381029638	0	0	0	0	7.08802851056371	11.1169658706802	6.73167715416016	16.9058357714739	0
ENSG00000059145	15.4738061811333	14.8263194949857	9.69532713344931	0	0	0	0	0	0	0	0	0
ENSG00000059378	0	1.90531161285559	3.12460775437928	0	0	0	98.3957646241263	34.2433024424469	63.8366252140034	21.3965106053457	29.004801154659	0
ENSG00000059573	11.8856795700761	12.3382751571198	14.462070811148	0	7.25573081811425	0	0	0	0	0	0	0
ENSG00000059588	12.4056042431082	24.1261865801821	21.5617279185463	0	4.80744526468648	0	0	0	0	4.97490837792486	5.62006036981117	0
ENSG00000059691	3.63818155932912	12.1019597035108	12.0291740878734	16.6990655493955	14.8164980644447	0	0	0	0	0	0	0
ENSG00000059728	0	0	0	0	0	0	0	0	0	0	0	0
ENSG00000059758	23.6573243567726	27.541895597214	22.0752758872438	0	12.6269941595638	0	0	0	1.78910254104192	0	1.07058259438373	0
ENSG00000059769	15.1865241762946	19.1293055873049	19.758719837198	20.1667080400563	17.6792288168756	0	0	0	0	0	0	0
ENSG00000059804	38.5275519624392	35.6497902656385	50.9958470398453	16.4680673508209	24.4538517390804	45.0975994710892	0	0	0	0	0	0
ENSG00000059915	20.0939976320545	33.2264098318013	28.155795962751	21.7896519656199	13.8022335519177	135.71181457255	0	2.82286066543625	11.5212951139628	4.55783327465753	5.45165612784773	0
ENSG00000060069	29.8670429229231	28.8556529413326	27.1360909673682	29.7123464006398	17.4821476816829	32.4100408076968	0	0	0	0	0	0
ENSG00000060140	0	5.98029983295598	4.25529566490311	0	0	0	0	0	3.06994950570153	2.34173624791396	1.85748703643288	0
ENSG00000060237	9.56633055950204	16.1419078710592	12.7157141826405	42.7743817041782	33.0630536638723	84.4410880992545	0	0	-0.239117809823275	0	0	0
ENSG00000060339	23.9724222930457	13.9861515658333	11.3178113940573	27.5057318970001	10.9509299536261	43.9672552394535	0	0	0	0	0	0
ENSG00000060491	1.89824466616448	6.21655802978171	4.51456939976864	0	0	0	0	3.85095435578067	22.6934661555035	5.50970051109605	5.08049838889957	0
ENSG00000060558	0	0	0	0	0	0	0	0	0	0	0	0
ENSG00000060642	73.2349566403788	66.7175596376834	64.5889877885678	97.7997342581606	103.164028684846	149.929306552216	0	0	0	0	0	0
ENSG00000060688	37.5276023475989	34.6796430613263	31.9354007016193	70.6104429501988	46.6122995082819	0	0	0	0	0	0	0
ENSG00000060709	0	1.14427438065563	1.20966541419199	0	0	0	131.420550816224	49.5937321071597	107.791752849804	66.4589246236203	73.0084550448316	0
ENSG00000060718	2.81499373668464	4.46049828236339	4.02518410736694	0	0	0	0	3.66493005244805	13.0842321705136	7.68376515151483	8.82779409841953	0
ENSG00000060762	6.38389399505962	14.4962335756584	13.264579760317	9.06051756512044	7.3861492564005	0	0	2.66498660283636	5.81719184829828	3.81999290753829	3.01793051995524	0
ENSG00000060971	31.3671506494027	44.3019656835261	41.3135933409008	0	44.4960921774751	47.8527375413887	0	3.49020857122397	6.1489548795673	2.55886736454875	1.25524730596021	0
ENSG00000060982	105.840854687515	80.5447429402846	72.5823875289567	177.419376876294	107.46650290964	162.875739922765	0	0	0	0	0	0
ENSG00000061273	0	2.94930802635618	5.85349148781084	0	0	0	0	0	0	0	0	0
ENSG00000061337	0	0	0	0	0	0	181.112562322357	60.6276596433969	135.103043078366	93.3341110561596	81.4042224797861	93.9835330956775
ENSG00000061455	0	6.46453441531362	7.82088780156233	0	0	0	258.51658711673	98.1906630492292	178.394921970347	122.813412645837	133.575670466343	217.045039102803
ENSG00000061492	0	0	1.08789174701323	0	0	0	0	0	0	0	2.53307010553082	2.24167958519429
ENSG00000061656	3.06907798289234	9.52182829775313	7.44981317265712	0	0	0	0	0	5.57878794900759	0	2.05693745879938	0
ENSG00000061676	28.2795878750327	31.7070131711243	31.1027224771468	27.3843332561012	14.8824340224695	0	0	0	7.3095629834137	7.02927592714856	5.80393594709204	0
ENSG00000061794	15.6140212954085	17.1882344551503	20.1544438581457	28.1389382952031	22.3990017171562	0	0	0	0	0	0	0
ENSG00000061918	0	0	1.06138949348464	0	0	0	0	1.64138462892359	6.47121199622812	13.3688497849137	8.25806711807795	0
ENSG00000061936	35.5779635526975	34.6672054058732	34.1524057913004	54.7275928832836	41.6497924434016	0	0	0	0	0	0	0
ENSG00000061938	0.176761792195869	3.77253353582166	5.56360310167801	0	5.02626280626017	32.0397816771225	0	0	5.24900979166075	4.17744022612423	0	0
ENSG00000061987	6.72009725421283	6.4412125514678	7.14042344613209	0	0	0	0	0	0	2.49327464802226	1.37709095248248	0
ENSG00000062038	47.4768127271354	33.6216197799995	30.4793428554955	9.71854077947533	7.22206790954895	44.5494463359263	0	5.66081456897143	23.1560939054325	31.0755424977851	40.7539244536972	0
ENSG00000062096	0	0	0	0	0	0	0	130.836073462015	0	0	0	0
ENSG00000062194	78.8315394673944	74.573054401914	58.3877346372799	109.557361253311	82.0396333211284	128.238459332045	0	0	0	0	0	0
ENSG00000062282	0	0	0	0	0	0	0	0	0.390068977918602	0	0.645749885793682	0
ENSG00000062370	0	0	0	0	0	0	0	0	0	0	0	0
ENSG00000062485	42.626204102226	41.1325840870772	37.1941726853289	57.484905396017	40.5684929500011	40.5066861397146	0	0	0	0	0	0
ENSG00000062524	0	0	0	0	0	0	123.318665389718	50.0068363710682	93.301904136493	70.2469085307022	73.6842917424871	120.89522267977
ENSG00000062582	6.14821160546513	11.1061604647622	8.30605273000021	14.1297857990526	12.9369927713322	0	0	0	0	0	1.52300588803273	0
ENSG00000062598	0	0	0	0	0	0	0	0	0	0	0	0
ENSG00000062716	34.8056030118112	26.6596048329045	27.6933972729723	50.9365365289806	33.0630536638723	65.3247324810333	0	0	0	0	0	0
ENSG00000062725	46.7149956818301	37.8357308892041	29.4575401603343	60.0175909085605	46.4362280405886	0	0	0	0	0	0	0
ENSG00000062822	8.10594371600698	6.67442111095601	8.89519791788	12.0635760747777	7.73611197514208	4.84628477208799	0	0	0	0	1.38104270673064	0
ENSG00000063015	0	2.70443853494506	3.50066725641225	0	0	0	75.8015851593247	18.9781548564944	47.0315961382858	36.5839384043746	40.2965041876939	44.4705709963404
ENSG00000063046	95.5524240219062	90.1117309440126	69.4376514118194	144.632093115389	98.6834097337999	151.11246536752	0	0	0	0	0	0
ENSG00000063127	0	0	0	0	0	0	0	0	3.45807677528326	0	0	0
ENSG00000063169	58.127609931781	61.9564804046748	51.0431300770719	21.4577759107699	28.5381816821394	0	0	0	0	0	0	0
ENSG00000063176	58.0611628657206	50.43909050746	48.5325029658248	66.6191936190105	48.3157333337011	77.5405563534079	0	0	0	0	0	0
ENSG00000063177	54.3068406525305	47.6872315212931	46.8526529343026	65.6618080191687	47.5071258643128	77.4061646183425	0	0	0	0	0	0
ENSG00000063180	110.796735101642	116.22252548992	99.1934749168396	48.5289637104588	50.6096838258167	107.52881849335	0	0	0	0	0	0
ENSG00000063244	97.9879136863413	88.5010394443806	71.9553048347771	116.724153018761	77.8791598101577	77.0880070362788	0	0	3.7684398165941	0	0	0
ENSG00000063245	20.9055381217095	22.9469294037577	19.7189040708379	23.3520102959941	16.3018410871719	0	0	0	0	0	0	0
ENSG00000063322	38.7482724025867	37.676427003601	32.5523480167259	52.5172700635139	31.6868661291718	57.7128795246316	0	0	0	0	0	0
ENSG00000063438	0	0	0	0	0	0	0	0	0	0	0	0
ENSG00000063587	12.791501090062	13.8564660038687	10.4514031710455	0	0	0	0	0	1.15328552351543	0	0.879441367549669	0
ENSG00000063761	7.2319286116044	15.6747140285525	13.5352674713783	13.4650088411637	13.6796642826958	0	0	0	0	0	0	0
ENSG00000063978	2.18418749053832	6.22821896170462	5.38001419420331	0	0	0	0	13.4051402901943	28.1339508455975	21.7212626384049	17.2955310625871	0
ENSG00000064012	4.64565764283123	3.13664958168296	4.86347422733302	0	0	0	0	0	0	0	0	0
ENSG00000064042	0	1.42568011489587	1.5669880849967	0	0	0	67.2984359159435	24.6782441506059	45.3815929252179	75.6140575637098	56.0929493759238	123.019471787564
ENSG00000064102	44.2425696732708	38.0603556407228	32.5362751098116	45.5748432840571	30.7466512028166	47.9083961706872	0	0	0	0	0	0
ENSG00000064115	9.55937093781902	14.2894537741368	11.2892294471684	14.9254644670734	17.3299928370156	0	0	0	0	1.15602920480272	0	0
ENSG00000064195	0	0	2.53968293046331	0	0	0	181.619269679	78.1183428251618	158.321949493711	122.643491784275	128.846704423549	207.829263194477
ENSG00000064199	6.56249653891928	9.64009100230193	7.37689893849618	19.0150566174351	5.20772530218841	0	0	9.18730529337058	43.0004489043995	20.1303763275809	20.4490702562462	0
ENSG00000064201	0	1.65888867438408	0	0	0	0	0	0	0	0	0	0
ENSG00000064205	0	0	0	0	0	0	0	0	0	0	0	0
ENSG00000064218	0	0	3.32598292070844	0	0	0	294.437035749666	113.487217941169	214.935398570766	201.555293448944	198.246077489191	312.481779697087
ENSG00000064225	4.66241890824615	5.77109793092823	3.06947016213495	0	0	0	0	8.47194623895401	20.7481973634564	8.98766587156379	9.42940293012787	0
ENSG00000064270	0	1.21734686631387	0	0	0	0	0	10.0103068535443	33.4270439581222	33.2205924064184	28.6254042255393	0
ENSG00000064313	13.7660370640233	16.7669076168052	13.9595605830116	23.2416454003217	15.0345888671368	25.4601349499174	0	0	0	0	0	0
ENSG00000064419	52.1162603872879	53.7677520646209	51.5358080457509	73.9985257668764	51.767527275065	93.3931393822818	0	0	0	0	0	0
ENSG00000064489	35.8881863239929	33.7196033418767	29.6064613530993	37.2610663037019	35.0505142500084	64.5677561825737	0	0	0.274740425567059	0	0	0
ENSG00000064490	41.4900887053862	37.0152448983898	32.9354113660153	42.6725870434959	31.6918756941148	72.79549575646	0	0	0	0	0	0
ENSG00000064545	3.81324281058874	3.34187593614416	3.07449588471861	0	0	0	0	0	2.48980437594139	4.35809959733298	4.10537696664784	0
ENSG00000064547	31.9630474537786	38.8305723005138	34.8698058813872	22.8852278396708	20.0813499705842	0	0	0	0	0	0	0
ENSG00000064601	15.9240032141798	30.6021601139038	26.6046525057919	13.5287306201578	15.5360974419784	0	0	0	0	0	0	0
ENSG00000064607	34.4283663274766	46.3594992029617	43.2578605625931	31.0521687236474	22.1801841755826	0	0	0	0	0	0	0
ENSG00000064651	12.6828869048628	18.9419640319781	18.1584784537086	8.39574060723149	14.2694542105105	0	0	12.1075579552504	30.9831026983078	29.0043580021037	22.7374339983031	0
ENSG00000064652	3.98191128714409	4.43639969498737	4.96508949818409	5.04873141947273	0	18.3758373570725	0	1.89213735367676	9.94675893692436	10.4580124961581	9.90494218311864	0
ENSG00000064655	0	3.19495424129749	3.87016429057787	0	0	0	77.9815458392397	31.5616459275037	67.9323494821487	70.3620479129955	67.4785660747233	0
ENSG00000064687	13.5482244640252	16.9412368380442	17.0091374482259	0	9.69650166983012	59.6078382215602	0	0	0	0	0	0
ENSG00000064692	0	0	0	0	0	0	44.2611430351044	15.5933758175229	32.7365092939218	28.0050077475144	28.1890263784328	0
ENSG00000064703	18.965693183385	21.0797074807917	17.5637213703352	65.0381046901987	44.4248508314266	77.8614413720494	0	0	0	0	0	0
ENSG00000064726	37.0054102866518	39.3702430090571	30.5121857577373	34.368372689717	27.0093658466501	28.8253831997081	0	0	0	0	0	0
ENSG00000064763	9.3571955047441	15.3326734641072	13.5952116004963	14.815099571401	17.8763099520682	0	0	7.85966799342832	23.4582433607659	6.70895218512894	11.5679353753294	0
ENSG00000064787	1.76421684008619	7.33828727012173	7.44670655958964	0	4.65529042001918	0	0	0	0	0	0	0
ENSG00000064835	0	0	0	0	0	0	0	0	0	0	0	0
ENSG00000064886	0	0	0	0	0	0	0	0.763909409958715	2.99676256587709	0	3.46774007753702	0
ENSG00000064932	15.7070156963054	22.5807902519364	19.8809501993376	0	8.91569183077143	0	0	0	0	0	0	0
ENSG00000064961	16.3274612388962	25.648261044582	20.5403356196361	11.8120410617437	9.35260017503718	27.1934969050345	0	0	0	0	-0.517408356173624	0
ENSG00000064995	26.003539677555	35.1079704904133	31.8230025989371	79.6427428774846	36.0127300418273	58.3748266232539	0	0	0	0	0	0
ENSG00000064999	26.003539677555	35.4150282590899	31.9452329610767	78.8162589877747	34.3520422902885	58.3748266232539	0	0	0	0	0	0
ENSG00000065000	25.3155133749463	30.6257037912644	27.4667228075475	34.206665757896	13.5275094380285	0	0	0	0	0	0	0
ENSG00000065029	4.74581704206378	6.7684720270972	6.5480266548684	11.0880573336214	12.9939943861986	0	0	0	0	0	0	0
ENSG00000065057	2.20960113141738	6.858655772162	7.79278255471994	0	0	0	0	0	0	0	0	0
ENSG00000065060	22.3508720278811	30.2821097797587	27.1857389931856	21.1138252326684	16.5206586287456	29.936160591431	0	0	0	0	0	0
ENSG00000065135	30.0443715620977	30.7267584819497	26.461725235962	39.1142270600072	24.5407973646045	21.6066938717979	0	0	0	0	0	0
ENSG00000065150	0	0	0	0	0	0	0	0	0	0	0	0
ENSG00000065154	9.93660762215356	8.61626896664072	6.91750550082789	0	0	18.8804882227122	0	0	3.73793745104193	5.32737053826308	3.92347726649105	0
ENSG00000065183	5.1077954124222	9.86704518166291	10.4237846527337	0	13.3746278544796	0	0	0	0	0	0	0
ENSG00000065243	43.2212026521348	43.5112458672908	34.8450445100915	61.5807306067675	47.6592807089801	73.1330902977158	0	0	0	0	0	0
ENSG00000065268	31.6382193846923	34.7651532024377	31.6150649647406	33.3006221942028	34.5259335413368	0	0	0	0	0	0	0
ENSG00000065308	29.0946823820367	27.298595681164	20.9519905240653	14.2709559164142	25.3479513562296	17.6353190959239	0	0	0	3.70416724017479	3.21979847953939	0
ENSG00000065320	0	0	0	0	0	0	316.84031381799	116.958203855003	219.81293872844	113.110650138584	107.839585329056	135.981548632352
ENSG00000065328	8.86155077863356	11.550032443423	11.8568318560731	11.1857501489191	6.75288651582374	0	0	0	0	0	0	0
ENSG00000065357	80.8476253283561	75.6566939523645	70.1134315594426	84.2474271304132	63.2401866911695	160.300384046056	0	0	0	0	0	0
ENSG00000065361	90.5647371921962	80.4343574882671	64.3625059148566	51.2702187998524	48.9272596678969	138.457822778749	0	0	0	0	2.32652597212115	0
ENSG00000065413	0	2.70366181141486	2.60945931903872	0	0	0	0	12.7009032076883	36.0132565453142	43.4486241694738	37.2768072788012	0
ENSG00000065427	53.0636821794339	50.4764034738193	48.2309040601743	49.5068861247601	40.8194485676322	0	0	0	0	0	0	0
ENSG00000065457	4.82994590368887	7.31185851215512	16.9670860269016	26.0932653853877	19.4268621939386	20.6138501778294	0	0	0	0	0	0
ENSG00000065485	5.01593470548275	6.91851387883693	8.32854608134904	0	3.82494654424977	0	0	2.67271667574227	11.9921705137	15.8967804107451	14.8474291449643	0
ENSG00000065491	19.1834884007622	19.7682964355644	15.8904338066804	35.7390002344138	32.4290641844139	46.5621779560755	0	0	0	2.74653721736434	1.8187875133814	0
ENSG00000065518	18.1246181885232	15.7734385486472	15.7045027953022	41.8375329187959	24.1248986878382	32.796757975582	0	0	0	0	0	0
ENSG00000065526	30.2361862916171	20.355983214951	20.9908557180515	47.158336165762	21.6780666121737	0	0	0	4.11776592857731	0	2.73421364553761	0
ENSG00000065534	3.32625824709747	5.41976127828283	3.38592704982648	0	2.88519389769352	0	0	6.63335309529603	14.94306996345	11.2122581787286	9.06367094548614	0
ENSG00000065548	28.0028720602569	27.9492474613464	27.9411277888415	78.8470642094638	38.5254980755166	52.1654390266231	0	0	0	0	0	0
ENSG00000065559	13.1958519562119	12.9500605238825	11.9270720884918	0	6.81809573496687	0	0	1.52395378346448	0	8.88967258541964	6.50938112298124	0
ENSG00000065600	0	7.7331853505003	8.04146364296299	0	8.78527339248518	0	0	3.9272965953402	16.9611004940046	7.89767667545831	5.46010480620581	0
ENSG00000065609	0	0	0	0	0	0	74.297156991945	23.553549263952	70.3892101636483	44.8554864659303	41.414569059211	0
ENSG00000065613	5.7033941611127	11.1566878101048	10.1699555128403	0	3.10328470038558	0	0	2.72852396674205	10.4759779228895	9.58295598797643	12.9805921160453	0
ENSG00000065615	0	3.29367876139214	2.16784379239415	0	5.28855316059594	0	0	0	0	0	0.889530241356614	0
ENSG00000065618	0	0	0	0	0	0	0	0	0	0	0	0
ENSG00000065621	20.3682931234389	19.8281545422393	17.5229779162887	20.9931919297663	5.15740798342805	0	0	0	0	0	0	0
ENSG00000065665	11.5991698987235	14.2373729817338	11.5416441708447	0	7.45135847554363	0	0	0	0	0	0	0
ENSG00000065802	29.8173493351225	34.9361734846604	31.5284300049972	23.3212050743049	18.6407178698129	0	0	0	0	0	0	0
ENSG00000065809	0	0	0	0	0	0	0	0	0	0	0	0
ENSG00000065833	5.98933698548654	13.268779224482	14.1178501913907	0	6.68695055779898	0	0	3.98117136811351	13.6693356373915	5.87767501338549	7.40088724146194	0
ENSG00000065882	0	1.89209723387229	0	0	0	0	136.519629297481	51.7327758579168	101.074193378723	67.2464224589256	68.1519782402542	102.910554301569
ENSG00000065883	65.5952209329799	81.2544761036118	64.1615945923707	56.1392940568993	49.4293772313057	150.10316363624	0	0	0	0	0	0
ENSG00000065911	29.934623682941	30.5526313056062	31.1593968146748	62.4585565326261	32.9529181542038	37.1383918820303	0	0	0	0	0	0
ENSG00000065978	38.207535334567	51.1006264960351	50.7659027828305	71.0236848950537	42.7880797029137	29.0777086325279	0	0	0	0	0	0
ENSG00000065989	0	0	3.2694707917131	0	0	0	65.6041888377973	25.4320553613296	63.8399009966066	38.327005148382	43.0183601480892	22.7424530476363
ENSG00000066027	30.2540734638344	39.9120627842824	34.1762906741789	29.2272256051768	18.4675533576462	70.7936018165155	0	0	0	0	1.5010617514813	0
ENSG00000066032	0	0	0	0	0	0	0	0	0	3.88594034579969	3.05589116168587	0
ENSG00000066084	11.9105263639764	15.7128037184421	14.5988176405521	0	6.99344046377848	0	0	0	0	0	0	0
ENSG00000066117	25.2264088154849	28.977498053389	21.143700529761	13.3484500853845	10.4109877329227	49.9868397197552	0	0	0	0	0	0
ENSG00000066135	28.9231495422909	35.2612899526939	30.9620003320815	56.2110532229251	28.2550405875787	45.2983126897261	0	0	0	0	0	0
ENSG00000066136	55.3718706129234	40.754533022823	35.9005202304678	60.0705802620765	52.1264713155332	37.033493103969	0	0	0	0	0	0
ENSG00000066185	18.016004003324	23.8059144325222	22.1227678595837	28.0080365850713	27.4687373361785	43.0104364227087	0	0	0	0	0	0
ENSG00000066230	0	0	0	0	0	0	172.009287155927	64.1763873254609	137.30764739276	106.039905125286	79.2716609587527	184.381484432094
ENSG00000066248	0	0	0	0	0	0	0	0	0	0	0	0
ENSG00000066279	24.6338798470419	17.9741469982565	17.0584051944521	31.5963123786343	12.7623747814022	30.5422871175143	0	0	0	0	0	0
ENSG00000066294	0	0	0	0	0	0	0	0	0	0	0	0
ENSG00000066322	28.049007518376	39.9267126812788	35.2861747608967	15.516764759862	22.0390796958915	48.4112049724986	0	0	0.653436294494883	0	0.654102913759515	0
ENSG00000066336	10.2138902839081	7.63135393628487	8.31495730177109	0	0	0	0	0	0	0	0	0
ENSG00000066379	0	0	0	0	0	0	0	0	0	0	0	0
ENSG00000066382	8.06053330619639	15.6625938570403	12.1364985166345	0	0	0	5.76574245230422	0	17.911125840513	27.6590943216979	28.527708358989	0
ENSG00000066405	0	0	0	0	0	0	0	0	0	0	0	0
ENSG00000066422	18.4787086198937	20.1974005881815	19.7343711104762	21.003460336996	17.0894388890609	21.354368438978	0	0	0	0	0	0
ENSG00000066455	11.2138398987485	19.1409665192278	15.8688910277054	20.015269515465	13.6803910215775	0	0	0	0	0	2.46235203386446	0
ENSG00000066557	22.1146227913078	19.8662442321288	20.0368977038132	43.5803287794288	32.6254185807249	19.2507473532866	0	0	0	0	0	0
ENSG00000066583	2.34362895749566	8.1343072980904	7.49071980522621	7.28691648279839	0	0	0	2.4514200299696	11.6953884277009	15.7427174323991	12.738997125793	0
ENSG00000066629	6.33420040725902	17.3025035248189	17.0851189097647	0	4.58935446199442	19.8733319166807	0	0	0	0	0.825464220639855	0
ENSG00000066651	18.7224843251287	20.6785855332016	19.853795524869	61.0468553590104	43.3988792982278	35.1691625314043	0	0	0	0	0	0
ENSG00000066654	15.6977886867074	13.0106953540876	13.6888728719503	13.4444720267042	5.98775185919746	24.6016829910143	0	0	0	0	0	0
ENSG00000066735	13.5228282057671	17.4323272230313	21.6984747479503	0	0	0	77.6629289733379	33.330573589822	63.7466787770124	36.3484156458161	40.985932858404	60.4954928170177
ENSG00000066739	13.1028575553149	20.2829107292928	18.6900216163739	22.3432826600036	12.6754291558781	0	0	0	0	0	0	0
ENSG00000066777	28.6568245593673	36.6191607464204	33.8512707294931	20.2077816689752	15.4714972114025	19.5030727861064	0	0	0	0	0	0
ENSG00000066827	37.829164956275	29.618243620593	25.2759447046486	44.7096897183213	37.7603634188903	20.6138501778294	0	0	0	0	0	0
ENSG00000066855	9.71824555779761	17.8746457546317	12.4398784199288	0	0	0	0	0	0	4.49166507547999	3.33368040473126	0
ENSG00000066926	5.77963508374985	8.07444919141547	10.4575017950696	0	0	0	0	0	0	2.05879584026335	1.85477227798794	0
ENSG00000066933	9.01233208297163	18.6139145700462	17.486454826206	22.1122844614291	17.3727389108961	38.6194284043276	0	0	0	0	0.713558172572065	0
ENSG00000067064	40.6262715207423	41.4722269385718	41.4431419617271	45.5259052008016	25.3276684276119	79.7127370249209	0	0	0	0	0	0
ENSG00000067066	0	0	0	0	0	0	0	0	0.396965497530027	0.469334363786944	0.573692247486028	0
ENSG00000067082	82.6944758657837	44.213201716346	43.121113733189	68.1720649099878	43.8582507877562	0	0	0	0	1.33724544321954	3.10415016540998	0
ENSG00000067113	8.08975708472594	26.5391118960244	31.1495645552174	41.8169961043364	34.2650966647643	40.6051157922646	0	0	0	0	0	0
ENSG00000067141	21.1071467078057	28.8556529413326	22.692712372392	23.3109366670752	14.57594411649	0	0	0	0	2.63625357545663	1.5010617514813	0
ENSG00000067167	28.9696360394724	28.307895169797	24.672719582292	0	7.047414536192	16.4153419728759	0	0	0	3.0232246744433	2.03168404418787	0
ENSG00000067177	0	0	1.57916244835761	0	0	0	0	5.38964553312546	19.159023898541	2.5869322135626	0	0
ENSG00000067191	20.6548027947915	38.4117567366679	32.9595989482763	14.1092489845932	20.0601249345153	0.99284369396849	0	0	0	0	0	0
ENSG00000067208	5.87206263766805	6.0105549517903	4.9379348237155	27.3021859982634	9.1569725176078	0	0	0	0	0	0	0
ENSG00000067221	1.8450293428012	1.51819609093091	3.51853856010338	4.50719606448744	2.25181326226929	18.0039141135656	0	0	8.17417003342225	3.73262574864054	3.59570926287747	0
ENSG00000067225	54.8359923351606	51.8616637282351	41.2183457563627	22.979841980058	11.6690138124154	71.6520537754186	0	0	1.05487838140426	20.8678173648383	20.9368483554115	0
ENSG00000067248	38.2497024537059	34.1650287675979	31.9232263382584	53.8908405863439	43.6162433620382	0	0	0	0	0	0	0
ENSG00000067365	0	3.28046438240884	1.73933031679698	41.9273610000088	33.5427080820185	0	0	0	0	0	0.385743536865021	0
ENSG00000067369	16.7734123772061	15.199742871774	13.8513828442932	28.1902803313517	15.5591695758083	43.8524303443008	36.5222755206278	13.0113469686743	36.3846243177294	17.7189397580337	17.1316237447336	0
ENSG00000067533	10.5333400648016	19.0554563781164	15.8089468985873	17.6872563709264	12.2160576663497	34.0254690650594	0	0	3.17821609952459	0	0	0
ENSG00000067560	21.4989015198739	21.7418534902362	19.8170755637057	17.7974250551068	25.9090064734888	38.483578592997	0	0	0	0	0	0
ENSG00000067596	14.6152053745256	14.5350999890781	14.2419588135906	21.9300407151487	22.0273025920336	0	0	0	0	0	0	0
ENSG00000067606	26.8888587985973	31.8176091953997	26.1177867707859	15.2708266010921	23.9169345015711	136.521027315392	2.21813917688973	0.850013875511849	14.6664165645001	8.07654475074634	11.142041478159	0
ENSG00000067704	9.63334447254118	9.76521376744747	6.95495627859711	14.7047346757286	10.2706164152124	0	0	0	0	0	0	0
ENSG00000067715	68.4934152139847	65.0060663981861	52.8906610172746	24.843271143593	26.594920647647	107.663210228415	0	0	0	0	0	0
ENSG00000067798	0	0	0	0	0	0	0	0	0	0	0	0
ENSG00000067829	8.2821386612241	10.6871637970076	10.4270544443237	12.2458198210582	7.99767559059622	0	0	0	0	0	0	0
ENSG00000067836	25.9624809136282	34.8250585112606	26.8338641813217	9.40311223124877	12.9836178188426	23.0806962042259	0	0	0	0	0	0
ENSG00000067840	6.65194964721619	3.46469904361482	3.2065585063156	0	4.129982972466	19.1163556182212	0	0	0	0	3.70340743641709	0
ENSG00000067842	0	0	0	0	0	0	38.3401105429209	15.7744205259249	31.1712371418125	39.2434738160706	39.2731237617181	16.1131955857159
ENSG00000067900	28.0779792889366	31.2996774352927	25.0942340572342	14.4121260337758	13.8767454178885	29.3135760280369	0	0	1.53823425124242	14.2508521436255	9.56506279648057	0
ENSG00000068001	68.3507272252872	64.7884023882717	62.6939025590088	53.7291336545229	49.8887487208342	99.4845932811582	0	0	0	0	0	0
ENSG00000068024	37.1631226040327	34.229520801623	27.7439554012508	45.8516244771248	27.6336025953364	16.6786015502593	0	0	0	0	0	0
ENSG00000068028	0	2.93764709443327	5.80103751424664	0	0	0	137.784696724445	57.6836365855616	133.43589931946	45.7933778646058	78.7081789641656	88.6456954941759
ENSG00000068079	7.06439382900655	7.75340032022533	6.56579472551674	16.629774282642	0	29.6838351586112	0	0	0	0	0	0
ENSG00000068120	19.8391414408088	24.2272412708673	23.504775505576	17.6052546237144	16.0297386648039	34.1732419939189	0	0	0	0	0	0
ENSG00000068137	26.3062359801886	22.936045195365	26.9225414376781	20.4490482747795	24.9987153763697	71.1309448724679	57.3148238583533	24.7115839748195	49.8689468309473	21.1875842396499	18.1128822865441	0
ENSG00000068305	0	2.05378675476266	2.01236013176184	0	0	0	0	0	0	0	0	0
ENSG00000068308	30.3634766042719	24.5901415940991	18.4443986547452	12.2636338213865	11.4356535131016	26.0830489119296	0	0	0	0	0	0
ENSG00000068438	3.84552626704158	5.43216267337268	7.24871349644592	12.5418144099507	14.8244396187572	0	0	0	0	0	0	0
ENSG00000068489	66.6702777764999	50.1087108749376	41.6253164529848	100.697545250629	52.2921079837366	67.0416363988395	0	0	0	0	0	0
ENSG00000068615	0	0	0	0	0	0	160.692793036827	56.9941368969359	127.559482535321	82.5718440271412	66.4112973756446	100.057582540091
ENSG00000068650	10.2387370778084	18.3177410097623	17.4363429565453	0	3.08154829400453	0	0	0	11.405287251559	9.0703319566284	6.06986992739295	0
ENSG00000068654	31.1448420464967	34.1634753205375	30.7252714435841	111.269860477808	49.605448698999	25.4436769126064	0	0	0	0	0	0
ENSG00000068697	42.1726931434513	47.8123847993544	43.8704267895082	69.1294505098296	57.8212150922872	35.0183127590279	0	0	0	0	0	0
ENSG00000068724	22.6778482774363	31.3136685378062	29.4177243939743	22.4844527773652	20.7600503719985	48.6657990417669	0	0	0	0	0	0
ENSG00000068745	0	0	0	0	0	0	0	0	5.0296133223421	0	1.69666972635467	0
ENSG00000068784	4.01372905110749	5.77046258602129	4.05864001205125	14.5464838350854	6.94356438651184	0	0	0	0	0	0	0
ENSG00000068796	57.7609128562388	54.4707309365797	49.6534154490876	26.0660745197368	15.7313230927475	41.1349823912306	0	0	0	0	0	0
ENSG00000068831	12.5754064136211	22.7883467769882	29.0472996721222	0	0	0	16.0726498916295	10.0801287864929	18.7417930099988	23.3339387527897	24.1724538519436	0
ENSG00000068878	28.9681810246202	29.5793772071733	26.2074322522254	59.1012789376376	38.3074072728245	29.1791842929715	0	0	0	0	0	0
ENSG00000068885	73.8406400412467	55.4815208281827	49.5677271546672	85.7025195275936	60.5523073724445	66.1288590073631	0	0	0	0	0	0
ENSG00000068903	5.23838461619702	9.35600913412978	9.82349254155242	22.5470373727238	14.7815754387683	14.8228171364805	0	4.96027263696087	15.6456761656784	3.42598186659668	4.95996635175416	0
ENSG00000068912	41.7099885268816	39.6042282920756	36.4171806467385	56.6629008974266	24.8675701992018	37.9968438409334	0	0	0	0	0	0
ENSG00000068971	24.4287746603432	26.0334381196326	25.2507763018175	49.7240332715049	29.5447005499219	0	0	0	0	0	0	0
ENSG00000068976	27.6084775133993	33.2599429870781	30.5657095095484	30.2672759265718	36.3737778992694	77.1982345852566	0	0	0	0	0	0
ENSG00000069011	0	0	0	0	0	0	286.520439395285	117.821455641596	214.672715603646	172.951369990562	176.752370050613	367.81468367312
ENSG00000069018	0	0	0	0	0	0	0	0	0	6.68734095051385	6.1457912108542	0
ENSG00000069020	0	1.89209723387229	1.59555717568234	0	0	0	77.1029099127226	30.2333790385042	68.6107398409462	70.96223061722	60.8274312586265	76.9960105114059
ENSG00000069122	0	3.28279455299943	3.38031515433292	0	0	0	0	0	0	0	0	0
ENSG00000069188	0	8.44369523735764	10.9515712952784	0	0	0	41.9715281758982	16.744889187776	38.382392983115	25.343413231159	34.3609034212933	63.8853108589855
ENSG00000069206	0	0	0	0	0	0	0	0	0	0	0	0
ENSG00000069248	32.0004031317033	28.2065546082106	25.2928032758166	32.0095543234893	28.8011987753568	0	0	0	0	0	1.17522299289833	0
ENSG00000069275	44.7243234617474	38.6472954667467	32.0431145964945	63.5160386209106	43.5734972881578	71.2653366075333	0	0	0	0	0	0
ENSG00000069329	39.5852884807207	48.4366078215702	40.9785692398905	60.6926362736792	55.483065048528	60.999556611896	0	0	0	0	0	0
ENSG00000069345	46.697321079202	54.4075644111833	46.4408458829172	57.730670989772	34.2822296924416	28.8852565214659	0	0	0	0	0	0
ENSG00000069399	0	2.65546463666284	4.39468114153256	0	0	0	85.4188191476841	38.3430957135343	78.4199094294895	50.4291356019364	56.0128668500279	78.7752897119064
ENSG00000069424	10.1021234496729	10.8852180753837	7.07287209996391	10.6424110902458	4.37335254593334	0	0	14.0884252088869	31.8931754595541	8.59234232639889	7.50881510942506	0
ENSG00000069431	0	0	0	0	0	0	62.2582196393023	30.3558659779312	67.6524888063901	69.8062014124173	58.9509243322737	0
ENSG00000069482	0	5.47884266142757	4.32068438899332	0	0	0	109.413695308541	37.5381164064561	84.947554661803	41.1642758871473	49.7834603354026	0
ENSG00000069493	0	0	0	0	0	0	0	0	0	0	0	0
ENSG00000069509	26.3496176833264	20.603630871535	18.3641014989001	18.5079243537727	32.7492824381554	0	0	0	0	0	0	0
ENSG00000069696	0	0	0	15.6826570900299	0	0	60.1516240945759	37.3880871974951	156.836259268453	77.1003808270276	91.6286568137424	136.061113862162
ENSG00000069712	0	0	0	0	0	0	0	0	0	0	0	0
ENSG00000069812	0	0	0	0	0	0	181.776653343951	70.141985446986	141.225258582186	108.565875058835	99.8545892994711	191.467976030707
ENSG00000069869	13.3593867752885	16.7065665369934	9.19222531413949	0	0	0	0	2.25111423969476	5.6416259012381	26.8123151748395	22.3885369554663	0
ENSG00000069943	15.0594559718993	15.588427163911	14.5660281859026	21.4372390963105	14.4230625329411	32.4100408076968	0	0	0	0	0	0
ENSG00000069966	0	0	0	0	0	0	0	0	0	0	0	0
ENSG00000069974	4.33430117757833	5.88617839725925	5.90640930521828	0	0	0	0	3.16338718538148	9.24298646276633	4.79923416496383	7.07504848287898	0
ENSG00000069998	0	0	2.63756456588111	0	0	0	0	0	0	0	0	0
ENSG00000070010	48.8148489340908	36.5445348137018	32.4781676552717	95.3459367819739	45.5616846131755	0	0	0	0	0	0	0
ENSG00000070018	55.717533908225	53.8384943796885	42.2992183405477	64.8661293511479	47.6817438542427	27.8160814684287	0	0	0	0	0	0
ENSG00000070019	0	0	0	0	0	0	0	0	0	0	0	0
ENSG00000070047	31.7982276986284	21.4023097990422	26.0430440198222	28.4828889733046	16.4329862643398	0	44.719609864037	23.3992642459953	61.0892209583328	23.8027834476995	23.3588448940482	0
ENSG00000070061	30.1524189003182	27.00242212088	25.9395504889109	24.4505660131975	13.8115361987453	0	0	0	0	0	0	0
ENSG00000070081	28.8428133611612	37.0467114519772	34.2853961005838	52.5510182633363	43.703915726444	62.8179361901456	0	0	0	0	0	0
ENSG00000070087	0	0	0	0	0	0	0	0	0	0	0	0
ENSG00000070182	0	0	0	0	0	0	120.676877723669	47.6593150900685	106.401129311729	64.0814756429616	56.3147855949353	0
ENSG00000070190	4.75483867500921	0	0	0	0	0	0	0	0	0	0	0
ENSG00000070193	0	3.13407562219309	1.7312398056136	0	0	0	42.6046361812672	14.9521910659707	31.7053812769308	57.7702672464822	63.5043315468823	68.4052556115494
ENSG00000070269	9.3971189018927	7.44939412446479	4.15974171664938	44.2408097947592	12.0019859013281	0	0	0	0	0	0	0
ENSG00000070366	31.3573222833413	35.1994641635271	28.8981819163962	28.2980605633561	12.6636346843049	29.4987681926976	0	0	0	0	0	0
ENSG00000070367	49.7351014459816	58.2106504182252	51.3042358816327	72.162367930785	47.1312682519175	99.0874684941291	0	0	0	0	0	0
ENSG00000070371	0	7.21158054500007	8.55519766208651	0	0	0	28.415360689946	15.8899001443775	33.0708178006844	23.1848609326915	15.4370165185375	0
ENSG00000070423	24.357164032266	28.2664127148855	22.3330475976837	8.78844573762703	12.4776212818038	0	0	0	0	0.324752033059272	-0.0759212834612475	0
ENSG00000070444	67.670794238319	69.6873355845845	57.3232567804196	92.3428782723167	49.8662855755715	68.3032635629388	0	0	0	0	1.00736392079665	0
ENSG00000070495	28.559234988011	32.744209645957	26.994510571362	46.9515476606347	15.5737469111481	17.0661889036825	0	0	0	0	0	0
ENSG00000070501	17.4267380431391	16.8630424039751	13.5373292109612	12.0201485274305	17.1810105825634	26.9871980701049	0	9.48083105074049	17.5838650447802	12.7087795929683	18.2376978261502	0
ENSG00000070526	0	0	0	0	0	0	0	0	0	0	0.0699936520890034	0
ENSG00000070540	3.99809791842512	8.85880828746124	7.62746663463026	0	7.0586496829216	18.0055782264982	0	0	0	5.76850510589393	6.72133795637233	0
ENSG00000070601	0	0	0	0	0	0	131.263167151273	55.2174791617117	96.329020457667	96.6315096158544	77.7449128046584	123.238053537203
ENSG00000070610	27.7823441476542	33.7331323918869	30.5327569349639	19.4703973545227	26.1263032627435	39.4611876841241	0	0	0	0	0	0
ENSG00000070669	13.4390608144681	13.2843237740559	18.4212121653728	17.7180615926156	15.3403520342346	0	0	0	0	8.08610554095515	9.12950335514044	0
ENSG00000070718	8.70839622993286	11.1635852347622	10.5392458282475	0	0	0	0	3.25609900642361	6.49703960143977	8.92021153277389	10.4382270026674	0
ENSG00000070729	0	0	0	0	0	0	0	0	0	0	0	0
ENSG00000070756	36.5346123544415	43.6418462890334	33.5618461872035	22.1328212758886	15.5367064305457	0	0	0	0	0	1.70688146531361	0
ENSG00000070759	8.44967344382195	12.2994087437001	10.1001791242649	10.2899749924557	11.1241501751261	0	0	2.50529480274291	12.7246655581471	17.9450490673049	13.1085146692923	0
ENSG00000070761	21.1909140991046	20.2704730738397	17.8297248735895	9.34285779984357	13.8325458662448	38.1147775386879	0	0	0	0	0	0
ENSG00000070778	5.08857207057358	5.52760987403077	5.8893215973597	0	13.2000958931375	0	0	0	7.16227700784	0	2.19311627582798	0
ENSG00000070785	0	3.35586703865767	4.33005280460745	0	0	0	0	0	4.68260753028626	0	0	0
ENSG00000070808	0	0	1.5669880849967	0	0	0	0	0	0	0	2.80815905187477	0
ENSG00000070814	18.603509436374	21.8034317466323	18.2619719846199	13.3135703165724	17.896592880686	0	0	0	0	0	0	0
ENSG00000070882	1.94571764939682	7.93207198402901	4.72065126170564	0	0	0	89.4536611283663	36.8256872842465	77.0536678586535	72.1729326353625	72.9859712778237	68.0211170620796
ENSG00000070886	0	-0.4158897736338	4.92576046035459	0	0	0	62.3622916002812	15.9925748871761	49.1702946069809	45.0890104111375	46.7297545390274	74.5303608585995
ENSG00000070950	23.9296669131521	19.7807340910175	24.7031942440935	34.5480288521429	20.695567891737	0	0	0	0	0	0	0
ENSG00000070961	31.513439949907	36.6432653264158	29.6964019182181	14.8649532346915	13.1245843461677	16.5290030569131	0	7.01700460114111	19.5928360284594	27.0107602317465	29.2656353536459	0
ENSG00000071054	6.23475127433563	4.59607600615565	4.41022175401363	0	7.2127988003661	35.2338277917969	0	0	5.34790956417071	2.79293402272469	2.54586944005938	0
ENSG00000071082	38.8112273988981	39.3570286300738	32.4973683303432	60.3718099938918	52.7724891407644	0	0	0	0	0	4.21707352652909	0
ENSG00000071189	24.8955427244941	30.4671211644949	27.1997916166068	50.5540998058148	36.1004024062331	0	0	0	0	0	0	0
ENSG00000071203	0	0	0	0	0	0	0	0	0	0	0	0
ENSG00000071242	0	0	0	0	0	0	0	0	0	0.995867333792901	0.785737189971688	0
ENSG00000071243	36.7413235464439	22.7549501163336	16.9628873258732	72.5445220324814	22.9606734073846	0	0	0	0	0	0	0
ENSG00000071246	0	3.55176263178656	3.16254526067904	0	0	0	213.423347718176	80.9116139221046	164.819092360473	65.2918113679061	70.7681487181652	100.176481508518
ENSG00000071462	23.5934636539989	33.0565139062412	24.5360000639436	31.4859474829619	20.4100876532569	22.7174712635208	0	0	0	0	0	0
ENSG00000071537	0	0	1.12817850609891	0	0	0	0	0	0	0	0	0
ENSG00000071539	0	0	0	0	0	0	0	0	0	0	0	0
ENSG00000071553	0	3.87048133238611	6.79151861856771	0	0	0	0	0	0	0	0	0
ENSG00000071655	60.5134060084155	59.6228413627323	49.9645995967904	68.9497943474037	42.8300990379126	34.5630360053211	0	0	0	0	0	0
ENSG00000071794	11.7981325076015	8.8209308653673	8.39220913896498	0	7.22462857828355	31.4471192738334	0	0	5.1934863799028	9.79726900514494	7.29668721088273	0
ENSG00000071859	7.02165986288896	11.1543576395142	11.3716440429479	0	0	17.9738562618881	0	0	0	0	0	0
ENSG00000071894	15.6902622180456	21.6572867753158	19.4955222816905	0	11.1886326553876	0	0	0	1.29577598649057	0	0	0
ENSG00000071909	0	3.92256212478913	3.79711811041243	0.402973537625257	0	0	0	0	0	0	0	0
ENSG00000071967	38.332902998026	35.8954364805798	32.3147299952423	0	8.28242909019467	12.4187751932616	0	0	0	9.40062601514346	9.18961762160904	0
ENSG00000071991	0	0	0	0	0	0	0	0	0	0	0	0
ENSG00000071994	44.6157092765482	40.3295060049766	28.8941581153934	39.2759339918282	31.5327843506197	39.7302057960505	0	0	0	0	0	0
ENSG00000072041	8.9760146423917	16.2753098032863	18.5460335431926	15.0981512863935	10.5449985938251	0	0	0	0	5.94547195953925	7.34283750820836	0
ENSG00000072080	0	0	0	0	0	0	0	0	0	0	0	0
ENSG00000072110	93.3384411350477	83.2686927648046	70.5177258167682	16.5609349901536	36.8654609008109	123.814561235983	0	0	0	2.33351728851813	1.9854633632045	0
ENSG00000072121	12.0013079209503	21.345424086779	23.610472201971	61.3160799382066	32.221541694784	0	0	0	0	0	0	0
ENSG00000072133	0	8.19416540476534	8.44794761105458	0	0.701306720725133	12.5946684890701	0	0	0	0	0	0
ENSG00000072134	26.3397429367082	39.445645665306	34.7513832386375	8.79871414485675	13.221019532049	15.9019571408068	0	0	0	0	0	0
ENSG00000072135	5.42546977657514	6.93423964894474	10.9674360647961	0	0	0	37.4426021558028	28.8154814624239	70.0306083328539	35.8122004288205	39.4344723668697	0
ENSG00000072163	0	0	0	0	0	0	0	0	1.68584496440917	0	1.70490558818952	0
ENSG00000072182	0	4.29491506485209	8.57020085788149	0	0	0	117.222046704538	43.6827315103394	114.404224268917	31.0570549497031	41.815348833292	102.155126271441
ENSG00000072195	12.0116140805139	20.2953483847459	18.8525315887168	8.08259515081918	7.47454835968794	0	0	6.84498714993632	23.6040742786696	0	6.95721480343894	0
ENSG00000072201	0	0	1.87373504229751	0	0	0	0	0	0	0	0	0
ENSG00000072210	9.668551969997	12.7168519643942	13.685139236517	0	0	0	0	13.4686776541	27.9050735361574	4.5021922591835	14.0660626856138	0
ENSG00000072274	17.4706656894128	21.8920487818644	19.6200947477337	27.8874032821692	19.6456797355122	17.0127345325297	0	0	0	0	2.13453739815741	0
ENSG00000072310	125.897791345701	80.4483485907806	80.3451865767739	85.1457898707312	54.0622045060622	126.88104150708	0	0	0	0	0	0
ENSG00000072364	61.7657914911101	48.2026225385518	39.8635156695263	93.5928725141114	45.8674477802734	0	0	0	0	0	0	0
ENSG00000072401	6.99681306898866	9.43638758198541	8.42828309213983	10.3105118069151	0	0	0	0	0	0	0	0
ENSG00000072415	36.754108112755	25.8216114973953	18.2488699335725	24.4608344204272	22.026575853152	24.5852249537033	0	3.28394160658193	11.3543038852404	14.9341652296869	12.1952739024467	0
ENSG00000072422	0	0	0	0	0	0	0	3.94589902567346	14.1357700969892	14.3167995818869	14.2477528975841	0
ENSG00000072501	23.525882893981	22.3965555907304	21.4254449329855	48.8215723524117	17.0010397857735	34.5136618933882	0	0	0	0	0	0
ENSG00000072506	12.8500955212338	14.2503555093111	12.1307771487394	0	6.0337047081073	0	0	0	0	0	0	0
ENSG00000072518	22.6298552305719	33.6278693335538	32.1812758421156	0	18.9464810369107	29.3135760280369	0	0	0	0	0	0
ENSG00000072571	66.4854226686635	64.7005620765698	61.2538290439588	113.05372996736	74.9954193902274	133.965339099924	0	0	0	0	0	0
ENSG00000072609	2.99928199754228	4.39986345215826	3.65427265698428	0	0	0	0	0	7.80649980856366	6.17583065358196	2.98392163247278	0
ENSG00000072657	0	0	0	0	0	0	0	0	0	0	0	0
ENSG00000072682	11.5829832674425	22.491396493174	19.270726076326	22.2739913932501	13.9636910434126	23.3565138642259	55.1412641614032	28.2912319485071	53.9477496888523	31.9598215851638	27.7718587487892	0
ENSG00000072736	1.84798423138512	0	0.00936841561412799	0	0	0	0	0	0	0	0	0
ENSG00000072756	26.7007929897617	32.5170243016065	29.374174992181	35.7390002344138	26.4413123252164	18.1235119242527	0	0	0	0	0	0
ENSG00000072786	2.03340618620026	8.05035060403946	10.3399556407371	0	0	0	0	0	14.2528784446038	7.0497734273475	8.19036669749525	0
ENSG00000072803	93.6726333749377	89.7720205501578	82.5547015109011	106.300688732319	80.7658071856145	203.159970696388	0	0	0	0	0	0
ENSG00000072818	66.7054852739557	51.2374407060193	44.0455749690553	18.816617309819	32.2537194556023	80.6041050584459	0	0	0	0	0	0
ENSG00000072840	1.08371700613927	6.27952303057743	6.32087015739426	0	4.63282727475651	0	0	12.1621554799552	23.0174101521261	18.219366004054	19.0882131969824	0
ENSG00000072849	46.9327908992073	32.7245808266583	28.9405134649335	54.3040825311988	31.5110479442387	86.8985102782093	0	0	0	0	0	0
ENSG00000072858	0	0	0	0	0	0	195.913743804057	80.0438200030522	153.843056293102	141.402980621013	133.23995232214	142.672009587065
ENSG00000072864	31.03509416734	31.2654713630541	24.6811876212753	49.8893228479259	27.1187746174369	49.540709037981	0	0	0	0	0	0
ENSG00000072952	9.98926353032654	3.07497681026874	3.73763164996426	0	0	0	0	0	0	0	0	0
ENSG00000072958	2.02474602358099	8.61393879605013	8.98839534549074	16.840235666757	12.9811923229759	0	0	0	0	0	0	0
ENSG00000073008	3.19223042101919	5.40654689929953	5.76544211185041	0	0	0	0	3.66879508890101	8.83087582441575	7.32631783292889	7.70654825243101	0
ENSG00000073009	0	0	0	0	0	0	0	0	0.0932868919195563	0	0	0
ENSG00000073050	37.7031163303575	34.3507445397137	35.9262155315521	49.8951804793754	44.0970391447564	0	0	0	0	0	0	0
ENSG00000073111	45.6502891244276	36.4744195572817	30.5933166146538	59.2523427827758	16.2235223628457	0	0	0	0	0	3.11911532529722	0
ENSG00000073146	0	0	0	0	0	0	0	0	0	0	0.687760806686784	0
ENSG00000073169	8.1648643134056	9.57242506843937	9.31434297786305	0	3.27790269031555	0	0	2.30839814198293	16.550769650917	0	1.94868594375246	0
ENSG00000073282	0	0	0	0	0	0	0	0	0	0	0	0
ENSG00000073331	5.17424247848259	6.79646749489647	6.53441968708433	0	0	0	0	4.41796710497941	20.6108713033185	21.9412730550123	18.4527616731822	0
ENSG00000073350	9.44096289604303	17.679526885033	13.7600636767428	0	12.368212511017	0	0	5.33577076035215	15.8503376316876	10.3981639505606	7.96436923604905	0
ENSG00000073417	4.19161318888078	5.24796427252995	7.33243019684712	0	2.29467723099721	0	0	3.68039019825986	15.6553031427283	26.2738899938986	28.4472467914441	0
ENSG00000073464	4.96948451373636	4.99711875358854	5.11153177693383	20.9498948033761	9.83611313568753	0	0	43.3609206422159	0	0	1.25280723158725	0
ENSG00000073536	12.1537352222327	15.980995073699	15.0863246728935	21.5681408064423	13.5267826991469	0	0	0	0	0	0	0
ENSG00000073578	17.0333747137222	19.4332564618607	15.4000979419049	9.77663655915801	7.01445013127788	0	0	0	0	0	0	0
ENSG00000073584	0	0	0	0	0	0	0	0	0	0	3.22988735334634	0
ENSG00000073598	5.85474231242951	7.02812260732429	7.91079255289574	0	5.00452639987912	0	0	0	6.22084178152868	6.1697317609181	6.04178867128273	0
ENSG00000073605	0	1.91774926830869	0	0	0	0	0	0	0	0	0	0
ENSG00000073614	40.1889805450517	29.0188959092834	29.3427999537486	58.2645266406979	39.5963958992407	58.997411186648	0	0	0	0	0	0
ENSG00000073711	19.1915817164027	24.4604498303556	18.6848735647236	36.0906317358904	18.0502012031166	17.382993663104	0	0	0	0	0	0
ENSG00000073712	77.5761036487025	66.0823735427964	63.4551281613867	74.5945126170672	70.0239177998371	95.0871328438363	0	0	0	0	0	0
ENSG00000073734	2.94845471578418	0	3.0037918084567	0	0	0	0	0	0	0	0	0
ENSG00000073737	0	0	0	0	0	0	0	0	0	0	0	0
ENSG00000073754	0	0	0	0	0	0	0	0	0	0	0	0
ENSG00000073756	0	0	1.30989779413589	11.5605284077377	5.14361260940107	0	0	16.5005330234213	43.8352937803124	28.1364336841136	19.4594062939798	0
ENSG00000073792	64.5947044711608	60.2501712790689	59.49341979203	38.8139375946792	41.692538517282	0	0	0	5.34563713850889	3.73187736745374	5.22027620489104	0
ENSG00000073803	0	6.50107065814274	9.91612637294699	0	13.8108094598637	0	0	0	0	3.49468400727095	2.78423903819926	0
ENSG00000073849	40.6628697025664	45.5224942006961	40.8345525105839	42.3669781848379	35.7812663892479	102.890004042428	0	0	0	6.26374924445177	4.98397350912975	0
ENSG00000073861	0	0	0	0	0	0	186.942695977432	74.2917884543939	132.111400762681	87.3561227173619	84.2360920571498	139.937936794014
ENSG00000073910	0	4.15344051368674	4.09261839203882	0	-0.15288158354893	0	0	0	2.13179842324052	0	0	0
ENSG00000073921	50.2550302903846	26.9036260593227	28.1955617843143	44.6549824958072	42.2981928313995	107.96403983742	0	0	0	0	0	0
ENSG00000074047	44.9842857982635	58.7996158532669	51.7924431333911	21.4475075035402	38.3494266078233	63.5749124886052	0	0	5.76286802705109	5.13008509068696	3.46160295797824	0
ENSG00000074054	53.3334383725267	52.4407964698197	45.1868555262016	67.3661178347373	46.9390723428791	122.185606507368	0	0	0	0	0	0
ENSG00000074071	57.8537503010173	76.6756849022749	57.9088647741361	17.4629489558998	22.271294790256	9.15582668139001	0	0	0	0	0	0
ENSG00000074201	19.9061553538479	24.2505631347132	25.0005727857802	26.7375055288172	32.865245789798	34.9003790612735	0	0	0	0	0	0
ENSG00000074211	0	0	0	0	0	0	144.574933388834	55.4399855737793	105.720959157668	90.2024163929304	81.2063062744501	179.331286158053
ENSG00000074219	60.9345103528251	57.3653817005689	45.7839547134785	77.3044613257163	55.8315742895063	31.4171971137283	0	0	0	0	0	0
ENSG00000074266	48.4289520871369	41.5219775603842	35.5882589423866	82.1324629538442	45.3653302168645	110.726758933453	0	0	0	0.621793938839599	0	0
ENSG00000074276	25.5621689846934	30.7823269067312	30.2464180267412	0	16.7554454943946	60.2028483986009	0	0	2.55677005188701	4.96882813617746	5.48359336340871	0
ENSG00000074317	0	0	1.95663636660762	0	0	0	55.7810493401721	19.1385694085193	45.1255537051542	51.0398454898644	55.4353442273857	40.1565845652114
ENSG00000074319	28.1207132550541	27.186656782086	23.2504825218394	48.2466234757357	25.6769044074718	53.6464755489203	0	0	0	0	0	0
ENSG00000074356	24.2058158809492	23.8696561568481	20.6527337223183	21.8607494483952	14.3136537621542	0	0	0	0	0	0	0
ENSG00000074410	0	0	3.32083486905813	0	0	0	41.934420367143	15.6615961776304	43.4227873305047	33.5231763376545	33.5815128390669	23.8860576366348
ENSG00000074416	0	0	0	0	0	0	0	0	0	0	0	0
ENSG00000074527	0	0	0	0	0	0	114.149087941738	42.8317928968379	90.6899972059138	79.7946795816155	79.8653647808083	60.6208070628882
ENSG00000074582	9.44273644920715	18.0880919211391	14.1469237255789	33.7514964714789	22.4794589895864	0	0	0	0	0	0	0
ENSG00000074590	93.9406890270943	78.4800719771293	67.0108304278816	28.7446923935683	22.9445920933272	37.5086510126046	0	0	3.47499818552364	1.51901854884444	2.58434695573919	0
ENSG00000074603	24.6350135409994	24.814928050254	20.933253692837	28.9859589993725	24.7806245736776	0	0	0	0	0	0	0
ENSG00000074621	35.9309202901105	34.9377269317208	30.7135609240664	59.2527174622289	40.4702125877722	50.1797516386861	0	0	0	0	0	0
ENSG00000074660	18.7556563876145	21.9256979216671	26.1421293877393	0	0	0	0	0	6.60454836195456	3.19399234302165	2.5353841318728	0
ENSG00000074695	25.1381847357717	18.1576049359323	17.6288135511036	28.341718855943	18.4653731410013	20.4959164800749	0	0	6.37847385948117	20.8572901811348	17.5612555547015	0
ENSG00000074696	15.6810352084476	19.4938912920658	16.2987960348323	32.7462101319863	10.642315540335	16.8948008347753	0	0	0	0	0	0
ENSG00000074706	0	0	0	0	0	0	0	0	0	0	0	0
ENSG00000074771	0	0	0	0	0	0	0	0	0	0	0	0
ENSG00000074800	51.4606073472413	50.4764034738193	48.8851414288224	79.0677940008086	52.0080812230198	41.8502849190529	0	0	0	0	1.5151023795364	0
ENSG00000074803	0	0	0	0	0	0	0	2.654114245409	22.9851279913109	26.6645894652193	21.8981386377947	0
ENSG00000074855	1.59611521050959	1.54850322236652	1.12349429829185	6.05901054718838	11.724503579852	19.2316968326718	0	0	0	0	0.762877974666697	0
ENSG00000074935	3.63761471235037	8.29366664839018	8.34867444410704	21.5681408064423	10.3372791121188	0	0	0	0	4.28218184257615	3.57746076029419	0
ENSG00000074966	0	0	0	0	0	0	0	0	0	0	0	0
ENSG00000075073	0	0	0	0	0	0	0	0	0	0	0	0
ENSG00000075089	2.15011368704	3.12032830857886	2.48442300915233	9.34285779984357	1.94544125113727	0	0	0	0	0	0	0
ENSG00000075131	20.2839588851612	14.0803438020246	13.2711422281843	27.4844297445439	19.9956424542538	0	0	0	0	0	0	0
ENSG00000075142	0	0	0	0	0	0	0	0	0	0	0	0
ENSG00000075151	12.5356818286859	22.0627452671645	15.627089254774	13.1851101587133	12.3257856173316	0	0	0	0	4.42120009044022	4.1315174279333	0
ENSG00000075188	23.6175356915672	34.2030695931315	32.5340574070704	44.9029190555296	38.2311024555199	0	0	0	0	0	0	0
ENSG00000075213	0	0	0	0	0	0	0	0	0	0	0	0
ENSG00000075218	13.7163434762227	16.3650089456849	15.8019205868767	9.17088246079283	8.30416549657572	46.444244258321	0	0	0	0	0	0
ENSG00000075223	0	0	0	0	0	0	0	0.0186024303332618	1.92830322916103	3.17603086687554	4.33095545172096	0
ENSG00000075234	3.2003237366597	3.62638856450519	3.83878925214546	0	0	0	0	4.53852152617987	15.2380722541861	5.59781605118061	5.04846537854119	0
ENSG00000075240	0	8.68778800523856	8.01757876008442	0	0	0	0	4.70594339917922	20.7210796054785	7.2548283692117	6.46549284987838	0
ENSG00000075290	0	0	0	0	0	0	0	0	0	9.43942019333398	3.16998257506428	0
ENSG00000075292	0	6.4412125514678	4.02330584730665	0	0	0	0	2.20258111466279	15.4738496090808	21.9573422641716	16.4002826780448	0
ENSG00000075303	38.9544822345744	48.7055759003573	40.2405028592457	66.1777340363209	49.188823283351	74.6141268200131	0	0	0	0	0	0
ENSG00000075336	49.0077973575677	41.86557157189	34.3851559960619	0	20.5202231629254	0	0	0	4.38404564902418	6.03839375160338	1.74702747235485	0
ENSG00000075388	0	0	2.26078045402424	0	0	0	124.701608746757	45.5394468060541	115.267095049926	60.3426515759823	53.1577856102678	34.9942301937887
ENSG00000075391	29.6319273803073	32.9958790760361	29.6570370666032	23.1697665497136	21.6570569446743	18.0055782264982	0	0	0	0	1.5109411371017	0
ENSG00000075399	15.1966403198262	24.577441559459	22.8276144033146	0	0	0	82.3886383271752	34.7505162961624	82.5146725001077	21.5896503326253	28.29653335839	31.8935785385567
ENSG00000075407	0	3.10866737665595	0	0	0	0	0	0	0	0	0	0
ENSG00000075413	16.3869486832736	20.1344355873857	18.1125869480117	19.0886891373124	14.946916502731	0	0	4.77069052937989	14.7444758839647	11.5375670789959	8.95550716347997	0
ENSG00000075415	37.3595007180223	39.3958950434936	32.2571279700278	68.7572821938935	40.186912565937	0	0	0	0	0	0	0
ENSG00000075420	54.2096647462413	47.356630411151	38.8521342499488	19.944475271686	27.8020521971057	0	0	0	0	0	0	0
ENSG00000075426	13.8809185258044	26.5220482749514	19.8677330470947	0	0	0	24.528584960398	12.42483687646	31.7295766945129	20.4194040184407	33.1375490620253	24.3789937535998
ENSG00000075429	0	0	0	0	0	0	0	3.28780664303489	13.4760809436952	13.0338606588091	16.2462547458117	0
ENSG00000075539	31.648013241269	37.7129077817335	29.4935994065738	33.0875732262332	24.7154153545345	40.9753749228389	0	0	0	0	0	0
ENSG00000075568	24.2895832722481	30.8558054566319	24.9340661887948	19.4018345937247	12.0624493439191	0	0	0	0	0	0	0
ENSG00000075618	36.5773463205591	36.3027722164115	40.9790330837337	5.50304699324662	4.2176553368718	0	0	4.1299908107796	17.276583785507	10.337758537755	11.0321156604794	0
ENSG00000075624	30.6313101481689	32.9570126626163	32.5741710306292	42.533115098374	31.5755304245002	44.2062314375642	0	0	0	0	0.675597530841441	0
ENSG00000075643	0	4.62296452678395	5.93732049980745	0	0	0	128.419115449764	38.3694282167735	117.200832095643	38.0314674895019	43.8919573302914	0
ENSG00000075651	0	1.9301869237618	1.7173236939787	0	0	0	28.4524684987012	15.2728776588584	41.5403472174706	55.3447523014718	49.7316685538035	0
ENSG00000075673	0	0	0	0	0	0	86.402377517502	33.0483948503017	66.5263651934982	28.866364232917	32.6061819286287	0
ENSG00000075702	23.9804941949102	30.8340370398464	28.5808486902252	30.6389267787925	29.2388338585042	37.0040001469649	0	0	0	0	0	0
ENSG00000075711	33.2765017143407	37.1088997292427	30.7163668718132	27.5947946402163	22.9887916449709	82.5733344090719	0	0	0	5.30021727819221	4.74280436757212	0
ENSG00000075785	37.7378710963143	30.6886687920602	30.020458361432	35.9699984329883	22.7265012906351	0	0	0	0	0	0	0
ENSG00000075790	19.1245678033636	23.4374451101102	18.6281992271955	0	9.28739095589405	12.6711006260815	0	0	0	0	0	0
ENSG00000075826	23.8447658278957	24.6182557335949	25.3330828860199	21.0239971514555	17.5263472333266	0	0	0	0	0	0	0
ENSG00000075856	55.8873360787378	58.1054272395136	53.7448591360349	159.054487556395	78.9507843727635	70.7936018165155	0	0	0	0	0	0
ENSG00000075884	0	0	0	0	0	0	0	0	0	0	0	0
ENSG00000075891	0	0	4.46364012626188	0	0	0	255.685872248831	110.654079950063	216.153600122747	146.641518058295	152.667213606045	240.373746366977
ENSG00000075914	19.7346415351471	22.5014814194494	17.0488964388643	39.8441229783333	20.6036421525874	0	0	0	0	0	0	0
ENSG00000075945	0	0	0	0	0	0	0	0	0	0	0	0
ENSG00000075975	17.2187966685373	22.1617935841818	18.0353204038825	23.0491332468115	19.3833893811765	0	0	0	6.10373343391411	1.79444922000968	1.06726869907871	0
ENSG00000076003	15.5724210232484	17.543489398579	14.8357882092775	13.9988840889208	0	0	0	0	0	0	0	0
ENSG00000076043	17.6293229242012	29.8581205875941	27.1004976979874	56.9778730618352	22.5009647469986	0	0	0	0	0	0	0
ENSG00000076053	41.1219162468529	41.9744035768472	32.2477595544137	104.729868210736	61.5794989396306	134.571465626008	0	0	0	0	0	0
ENSG00000076067	23.0238453931662	15.251823664177	12.2343057743231	5.62368029614873	4.78643559718707	0	0	0	0	0	1.35909857017921	0
ENSG00000076108	45.5486449783494	46.4862059280834	43.4676764568499	1.51179766205836	23.5582986441678	4.59395933926813	0	0	0	0	0	0
ENSG00000076201	17.2944707441957	26.7451149740158	24.4606117798746	32.2713577437529	31.6639295277876	73.4183318051576	0	0	0	0	0	0
ENSG00000076242	44.4822482974487	43.7840975637289	38.2712511701213	113.205168491951	83.3872572512089	47.6043957619768	0	0	0	0	0	0
ENSG00000076248	30.0558513581084	38.2092709687276	32.6345718223825	31.4962616881359	22.3835651819085	0	0	0	0	0	0	0
ENSG00000076258	0	0	0	0	10.0400265326737	0	0	0	0	0	0	0
ENSG00000076321	7.36036222590842	8.86204752224576	7.55382369222617	12.9650187028937	0	27.1178854651904	0	0.976946292927671	2.40610943400588	11.4983316702054	6.64785363106673	0
ENSG00000076344	0	0	0	0	0	0	62.6455149242193	21.384330289794	51.8616210936877	25.053380976463	23.275566282302	0
ENSG00000076351	15.0681161345186	17.964039513394	21.4793133227667	0	13.1333471676432	56.0024220674316	0	0	0	10.590464239889	6.41567694540326	0
ENSG00000076356	0	0	2.12475823444408	0	0	0	106.01132551106	40.5751516159578	84.5151821582835	60.8882618325106	59.3366678691387	75.1476737330833
ENSG00000076382	27.8935876240384	25.0613062339606	25.1810520287133	40.0960658317621	24.3696563504595	85.3959478286782	0	0	0	0	1.82764160984426	0
ENSG00000076513	10.3987453917445	11.5375947879699	9.37148115923431	23.8858855437512	17.1104485565603	0	0	11.5296728486243	33.0774987105415	18.1767004020319	20.3233409681627	0
ENSG00000076554	0	0	0	0	0	0	0	0	0	0	0	0
ENSG00000076555	4.74617851238994	4.4993646957831	4.03455252298106	0	0	0	0	0	0	0	0	0
ENSG00000076641	0	0	0	0	0	0	94.552801139904	36.9756914456419	77.9078309893622	88.3514331839467	67.0528860190036	115.396133908462
ENSG00000076650	8.53457452907837	13.1824923598405	11.5842658849515	0	4.26112814963389	0	0	0	0	0	0	0
ENSG00000076662	8.61024860473678	29.6578867575429	10.9726502304102	0	7.62670320435524	32.3085651472533	0	0	2.36935557339824	0	0	0
ENSG00000076685	17.537679602452	16.9418115166788	16.9146320533374	8.23403367541047	13.5485191055279	26.4529786438859	0	1.99795438099691	7.52841892806802	10.0179916629434	7.0829519913753	0
ENSG00000076706	39.7863302198381	45.8083486664042	40.7678256579472	0	11.9755037183949	2.87705542146196	0	0	6.57016789351189	5.21764376356344	10.7143898985793	0
ENSG00000076716	27.0774628271175	30.0939915009017	28.620641571898	0	15.2526796698288	9.44024411135612	0	11.3366412243173	0	5.537410638375	4.99843998587954	0
ENSG00000076770	12.5310316171882	19.0685390308405	16.0212647509589	0	0	0	0	28.1686340689798	6.08545511403542	13.7100608767677	14.0264215566661	0
ENSG00000076864	0	7.42302068770287	6.57469929728762	0	0	0	0	3.92536407711372	21.4215116247079	20.5208972299559	25.3775244898896	-2.3659668715952
ENSG00000076924	22.6628771831465	19.7403886864115	17.2222104281153	35.5447357386115	24.3417707506641	0	0	0	-0.0931416144992793	0	0.0866124818004875	0
ENSG00000076944	0	2.45801559647355	2.56871586499219	0	0	0	0	8.7980065973608	22.400024524433	18.705180359351	18.4118551093665	0
ENSG00000076984	42.5037282975369	39.668658658484	38.668169941208	27.1802683017943	21.2074294614715	54.306612440359	0	0	0	0	1.99792341302463	0
ENSG00000077063	11.485312081864	17.5681998881418	17.4904604354423	11.5593893941207	13.1867591200171	23.381098386784	0	0	0	6.05412914635335	0	0
ENSG00000077092	0	0	0	0	0	0	0	0	0	0	0	0
ENSG00000077097	27.1126703245733	36.2639058029918	32.7437073146827	37.3919680138338	31.0082036419482	24.7196166887687	0	0	0	0	0.951410896762754	0
ENSG00000077147	29.4805792289905	31.7917465887055	23.4396833248076	28.7934468458623	31.1393488191161	24.7196166887687	0	0	0	0	0	0
ENSG00000077150	-0.15786212527454	0.604151261109768	1.52163682626864	18.8482394583323	0	0	60.1804516084099	30.0384013922564	74.2894956082414	32.5536714256009	37.9598153817939	69.5934368122482
ENSG00000077152	9.43286958040251	10.4314100972038	10.2996760305338	43.3185253591651	17.1321849629413	15.9019571408068	0	0	0	0	0	0
ENSG00000077157	4.52781644803398	6.53605345391146	5.77434668362129	19.7740029096608	3.99956453417974	21.8590193046177	0	0	0	0	0	0
ENSG00000077232	15.2925953605853	27.3222687257842	26.2599012065905	44.7854045810018	41.2986469711806	56.8740022495194	0	0	0	0	0	0
ENSG00000077235	10.256057403047	18.536958466737	15.1355088548677	21.4064338746213	13.9419546370316	0	0	0	0	0	0	0
ENSG00000077238	16.7572257459251	27.0653871216758	26.0229156570642	0	0	0	0	0	0	3.80890885662671	8.35406452716223	0
ENSG00000077254	8.24806485772578	11.2662965385922	7.34226245630449	22.153358090348	12.6312296042344	0	0	0	0	0	0	0
ENSG00000077264	0	2.27378093526756	3.03375243067207	0	4.89511762909228	0	0	46.2411783339242	10.6471909561538	11.1341129551395	4.47489451014713	0
ENSG00000077274	0	0	0	0	0	0	0	32.1581334644631	0	0	0	0
ENSG00000077279	5.16853673649504	2.52727893046931	1.970232064301	8.78939824501481	0	0	0	36.2900389031511	0	0	0	0
ENSG00000077312	81.2675959788082	73.7902487529287	68.1703839724129	159.760338143203	84.6979822840062	103.455968057032	0	0	0	0	0	0
ENSG00000077327	0	0	0	0	0	0	204.363581343466	81.2329300405179	155.25572149161	197.492565155767	180.133404690834	160.345902623642
ENSG00000077348	28.9606545559584	23.8696561568481	24.223177367306	72.0734861599631	39.1152880033313	0	0	0	0	0	0	0
ENSG00000077380	7.95477527765889	9.01107041369803	8.97496414270294	26.7283481056773	5.6377333300201	0	0	0	0	0	0	0
ENSG00000077420	0	0	0	0	0	0	49.4467597754196	18.9300776384005	57.0173181458825	29.8738724848296	36.0776642722273	0
ENSG00000077458	71.0078103181071	59.8891705807594	49.898055616197	126.379761752763	78.3093863016481	80.0492670485265	0	0	0	0	0	0
ENSG00000077463	10.9355285146817	18.1128243910623	17.7580534905337	0	9.13737221321501	0	0	0	0	0	0	0
ENSG00000077498	0	1.90686505991599	0	0	0	0	0	0	0	0	0	0
ENSG00000077522	0	1.16759624450145	2.80100222591051	0	0	0	75.6070936856184	30.876011275331	67.0453436790802	54.7334855463357	50.6249410612217	0
ENSG00000077549	67.4842385895464	57.2651037334138	47.6876503779913	47.4789964641716	54.9978835255472	0	0	0	0	0	0	0
ENSG00000077616	0	0	0	0	0	0	0	-0.0333398242135723	0.0712452314875696	0.154062978345952	0.237852724190688	0
ENSG00000077684	37.0507927208045	42.5476657499408	41.066567578829	-0.965874672851135	23.5658235176775	0	0	0	0	0	0	0
ENSG00000077721	14.9502035376916	17.4636626822102	16.4758403947197	0	16.0837254798411	0	0	11.5190901679692	0	0	0	0
ENSG00000077782	44.0164555890115	55.1565449257602	49.9970002147196	20.9720838032806	21.6450962132325	0	0	0	0	0	2.20226483592165	26.1416571204306
ENSG00000077935	0	3.64971042835101	3.61072325519096	10.5825836344085	0	0	0	10.6362691782643	32.7824964198055	18.886609880956	19.8934996700083	0
ENSG00000077942	15.1998975668519	20.2802933724918	16.8261670795872	0	13.2380612829172	57.2460761187365	0	0	4.72395736791688	0	3.79857866819042	0
ENSG00000077943	0	0	0	0	0	0	40.9154551532135	16.7204892027633	35.6977732538118	52.4496941312172	50.9246744408185	0
ENSG00000077984	0	0	0	0	0	0	0	0	0	0	0	0
ENSG00000078018	0	7.12917729800953	7.72020021839775	0	0	0	0	0	0	7.32576096572082	5.88006671873983	0
ENSG00000078053	0	3.47713669906793	3.06466362526124	0	0	0	39.0532608568785	16.4011056025764	37.4615443595657	45.7606825790792	44.5774342467533	0
ENSG00000078061	9.8106731117158	8.67612707331565	11.846049024242	15.390048448077	10.4669708115234	0	0	0	0	0	0	0
ENSG00000078098	0	0	0	0	0	0	0	0	0	0	0	0
ENSG00000078114	2.8901009653643	6.08362743744854	6.66179810087425	0	0	0	60.173378490436	21.6047268323693	47.5354330088904	42.6228890231861	47.16354759143	0
ENSG00000078124	8.2821386612241	12.8746578676336	12.1064406320027	6.30899406849713	6.5558053806311	0	0	0	0	2.41070113339349	0	0
ENSG00000078140	54.3825147281889	59.6259482568531	48.0459236211698	65.1690064003305	55.6786927059573	75.0337600625202	0	0	0	0	0	0
ENSG00000078142	7.63514578379674	8.16073605605701	6.69036719155988	13.0209616746195	11.6038045932723	0	0	0	0	1.2934661067813	2.27036345990072	0
ENSG00000078177	117.608126215815	115.842395235585	96.474910171396	113.739043739708	94.3338824808785	78.2317005026237	0	0	0	0	0	0
ENSG00000078237	9.82856028393308	14.2156045649484	13.6865307680468	21.2960689789489	5.57257992131276	0	0	0	0	0	1.71478497380993	0
ENSG00000078246	24.9550301688715	35.5020918472616	31.2235613077567	75.0765446696204	69.9481469164678	98.9634843782075	0	0	0	0	0	0
ENSG00000078269	8.84536414735253	6.48940972621983	8.6671319209255	14.4121260337758	0	0	0	3.42188869182067	14.1339903017262	15.1203666263514	20.1135695000823	0
ENSG00000078328	0	6.46453441531362	5.87503426678587	0	0	0	45.3892513862745	35.992417908137	88.0460648247198	61.0478668363124	56.3966345097688	0
ENSG00000078369	39.3565657128092	48.151318469679	37.9621392242296	20.6312920210599	27.18398383658	0	0	0	0	0	0.787503578909231	0
ENSG00000078399	0	0	0	0	0	0	369.853039890865	148.185195798883	265.808240416799	230.296418565211	212.465330154292	368.843435458182
ENSG00000078401	0	0	1.2766310138864	0	0	0	0	5.26082076546856	23.3596237773643	25.7913721828506	25.668497398777	0
ENSG00000078487	89.1956442086618	81.1681892389702	68.1638215045455	82.6868750160608	77.3987786531298	138.575756476504	0	1.81386259589077	7.25523916216651	5.82946738590761	5.16827493510531	0
ENSG00000078549	0	5.43297565726613	9.79999463483148	0	0	0	48.7545133750004	15.4871669836566	47.6592222663621	20.6367228973194	22.6415444554145	0
ENSG00000078579	0	7.09031088458982	5.5060010764635	0	0	0	0	6.98800903792299	23.239606551709	29.5873577627527	30.172120639061	0
ENSG00000078589	0	0	0	0	0	0	0	0	0	0	0	0
ENSG00000078596	16.0339919458606	9.11689215785566	13.6935570797574	0	0	25.8303940804917	0	0	0	1.88256476009424	1.84073164993283	0
ENSG00000078618	55.004660811716	42.5527595949015	35.263261882388	128.646558976177	69.4670390205584	107.882619586613	0	0	0	-0.00554202545578918	0.423704178595645	0
ENSG00000078668	17.7392881885482	22.7883467769882	18.4863043461412	18.3623017360451	4.41473647206445	0	0	0	0	0	0	0
ENSG00000078674	36.674343189571	32.6150719954339	31.4964498144385	50.5128227577226	48.8031442204196	18.469431624929	0	0	0	0	0	0
ENSG00000078725	25.2484994619071	24.2412323733808	30.339843525937	0	0	0	0	0	0	23.8182957896507	26.3249836324042	0
ENSG00000078747	14.2027611927353	16.9052752738497	14.9753409864283	12.37672153119	7.64843961073628	16.3901499691356	0	0	0	0	0	0
ENSG00000078795	6.47247397784603	7.92535669659012	7.68711939880502	0	0.149794605560122	0	0	0	0	0	0	0
ENSG00000078808	8.99557860471184	20.0854616891035	18.5036267611524	12.6077197297645	9.57141771661087	0	0	0	0	0	0	0
ENSG00000078814	0	0	0	0	0	0	0	0	0	0	0	0
ENSG00000078900	0	0	2.31957093290589	0	0	0	199.636431432084	77.9195136461754	159.056224333421	129.023052319362	118.95840002526	163.317773353548
ENSG00000078967	0	3.17240910098188	3.92964457585267	0	0	0	26.0110521928561	10.2072035143043	36.7985147513431	14.1079205226923	15.2755285447413	0
ENSG00000079102	6.28280627852216	10.111914673074	8.02226296789149	6.87367453794341	0	18.7460964876468	0	8.8685512822409	17.8870693677455	13.0460584441369	15.6867245054727	0
ENSG00000079112	0	0	0	0	0	0	0	0	0	0	0	0
ENSG00000079134	27.7169292358831	37.6864790237669	30.1595472947396	48.0053568699315	35.6627673230857	26.9576295095256	0	0	0	0	0	0
ENSG00000079150	3.46572015889395	8.04290807462698	5.47265492891549	31.9922982677024	12.8861340829837	60.030301816753	0	6.76590344174605	19.5041784914813	4.68137596542162	4.45214364372525	0
ENSG00000079156	0	6.79569077136628	6.68802508765635	0	0	0	45.8878567953092	22.8163043366212	52.8572486917042	58.0314409732386	62.1404561903923	0
ENSG00000079215	7.07987696046629	11.4820172900293	6.66003361342621	19.2179958638483	0	0	0	0	0	0	0	0
ENSG00000079246	29.0022548281185	23.4032390378717	19.113850884164	27.191821102591	16.3895134515777	11.1736060664732	0	0	0	0	0	0
ENSG00000079257	5.03155448978504	6.205673821389	4.92856640810137	8.76790892316757	11.1016870298634	20.6303082151403	0	0	0	0	0	0
ENSG00000079263	0	0	0	0	0	0	0	0	0	0	0	0
ENSG00000079277	3.10846302972026	6.90762967044422	8.84884256833991	0	0.393435531503662	0	0	4.10365830754044	12.6890429424033	9.25820395491716	10.636492737994	0
ENSG00000079332	18.1933326424986	17.887860133615	15.7494666133125	14.9562696887626	12.9587291777133	0	0	0	0	0	0	0
ENSG00000079335	0	0	0	0	0	0	0	0	0	0	0	0
ENSG00000079337	0.983196136580559	0	1.76602114742233	0	0	0	0	0.890261385838596	1.56539616186602	2.7188270900854	4.56090466741533	0
ENSG00000079385	11.3490014187843	6.40312286157829	8.09625972043072	0	9.11277296596408	0	0	0	0	0	0	0
ENSG00000079387	31.5631121560126	32.7004822392823	26.7450511542275	69.5940344908332	46.8506732395917	117.945448261363	0	0	1.55181520655422	1.3200624996441	0.309822253403773	0
ENSG00000079393	4.29305009896505	12.2565772632277	13.0737463255329	1.18708691858873	4.74174805377327	57.8798656588096	0	0	0	0	0	0
ENSG00000079435	1.89128504448146	0	2.88248913400358	0	0	0	0	0.291841330652762	9.89933516113181	15.2805284973612	11.453843961951	17.1562629433049
ENSG00000079482	11.8023444373885	14.7958939752099	14.1650941812633	0	9.32649047364897	31.3128124656004	0	0	0	0	1.70609821654255	0
ENSG00000079557	0	0	0	0	0	0	0	0	0	0	0	0
ENSG00000079616	29.3800583594318	33.3892237093542	28.2090095521561	39.4171041091898	26.0261403873317	9.69256954417598	0	0	0	0	0	0
ENSG00000079689	0	0	0	0	0	0	0	7.46036693401629	15.3654882244018	27.8046718992703	23.8911767726493	0
ENSG00000079691	22.7211401252718	22.4956575827825	18.4961371509117	17.9130957393948	13.3668361981207	15.2692657461952	0	0	0	0	0	0
ENSG00000079739	4.81319242542908	4.79320808547644	5.74155722897185	9.20168768248201	0	0	0	2.13590146623564	10.813502874824	6.8968241834177	11.6557119215351	0
ENSG00000079785	6.70076071012021	11.7235005567252	7.45297857558856	14.1920803191393	4.72937700517659	0	0	0	0	0	0	0
ENSG00000079819	18.8084538736115	30.2140427116069	24.4670355370801	0	5.02117556519409	0	0	3.49000632008446	11.1281680848858	8.1119611430022	5.32340485358013	0
ENSG00000079841	0	5.28372379182887	3.75027603234179	0	0	0	0	0	10.6743528667774	10.5793801889774	8.75977632345461	0
ENSG00000079931	0	2.53341825272238	3.45992380236571	0	0	0	71.2518723441097	34.4645990882195	74.902607718365	62.947057672774	57.5898498849704	0
ENSG00000079950	5.25857671676026	9.04226622513703	7.97776299372438	0	0	0	0	0	0	0	2.054664360448	0
ENSG00000080007	0	0	0	0	0	0	0	0	0	0	0	0
ENSG00000080031	0	0	0	0	0	0	0	0	0	0	0.54569910047038	0
ENSG00000080166	0	0	0	0	0	0	0	0	0	0	0	0
ENSG00000080189	16.7167666468741	15.1526866136436	12.6137597234035	23.3402784385845	4.03114966647415	0	0	0	0	0	0	0
ENSG00000080200	0	0	0	0	0	0	0	0	0	0	0	0
ENSG00000080224	0	5.7882306006948	4.87377033063364	0	0	0	59.2665871850938	22.636077587968	50.8764014365591	37.5254992180258	38.7697560335996	0
ENSG00000080293	0	0	0	0	0	0	84.8532495864256	34.6037559397532	68.171467291972	83.1664847059099	72.8046112081234	91.3989844744434
ENSG00000080298	75.8755582829484	77.8527420607927	71.6124986312368	160.738260557504	94.3338824808785	123.801034764731	0	0	0	0	0	0
ENSG00000080345	14.4162925286287	18.8729534793076	14.1627828536323	42.3601730392812	56.0942103085226	46.366896168447	0	0	0	0	0	0
ENSG00000080371	11.5408161483037	15.2246181826802	13.5038924329459	8.63700721303573	8.96061812129678	0	0	0	0	0	0	0
ENSG00000080493	0	5.87374074180615	5.47321162181405	0	0	0	40.7572210059407	19.5420253211717	40.2209689108825	46.4428819307244	38.7357471461171	0
ENSG00000080503	0	2.67800977697845	0	0	0	0	59.4892340376252	18.6254314320939	32.9470285432126	48.1392452941541	39.1853472155124	13.5977045423039
ENSG00000080511	0	0	0	0	0	0	0.98270788749609	1.74525042923715	7.80984026349224	14.2126148326431	10.1087860198269	7.11711680200209
ENSG00000080546	19.5618587790542	17.9376107554274	20.3197597782354	20.841753405175	21.2839043417884	37.7445184081136	0	0	0	0	0	0
ENSG00000080561	0	0.231196437591826	0	0	0	0	0	36.0701113253657	13.2323808144095	28.1207536714063	17.4216292575563	0
ENSG00000080572	0	3.13276596403197	1.90511008072992	0	0	0	0	20.4392940279847	0	2.44949531158402	2.37831775372034	0
ENSG00000080573	0	0	0	0	0	0	35.0780700328522	11.2160868031168	37.4700050646859	33.0831555044398	26.7245583091378	37.3150218199053
ENSG00000080603	44.2032650947579	42.7836379837991	36.0663975591139	55.0249194420717	28.6799834482403	75.5877749408664	0	5.04586194792587	17.5902872817464	18.4067169974973	9.33814205576203	15.6246652471817
ENSG00000080608	22.8211031131126	28.3814585080843	32.7530757302969	46.1393401225419	10.5553699148108	31.921847979368	0	0	1.37036167290672	0	0	0
ENSG00000080709	34.5882273304057	49.8976939176816	46.3554379547128	68.6235568930309	60.4884109890519	144.34375331933	0	0	0.503998972236048	0	1.70115245361987	0
ENSG00000080802	29.5603319681883	33.3564180454178	24.192195338316	43.1352484565752	26.1348139805015	14.7071573074138	0	0	0	5.50391945710305	5.29342777110461	0
ENSG00000080819	8.6431887142776	15.3186823615937	11.9771839581525	0	11.2103690617686	17.0127345325297	0	0	0	0	0	0
ENSG00000080822	17.4531745552903	24.8801164327324	22.3907955609647	39.015943494841	23.9458822849551	0	0	0	0	0	0	0
ENSG00000080824	17.6133536781104	22.283063244592	18.7883670956349	19.0578839156232	19.3174534231517	19.2672053905975	0	0	0	0	0	0
ENSG00000080839	51.0816701219705	40.9063085759706	36.1390027801233	82.6868750160608	55.5250843835268	23.8611647298656	0	0	0	0	0	0
ENSG00000080854	0	8.25557695850067	7.77123977574491	0	6.79635932858583	0	44.3033220201212	27.2668885138827	56.8087027016114	23.0258127960978	20.8988877136809	0
ENSG00000080986	62.2397839387335	56.1483189752459	49.233554585852	86.9797405549843	58.6677101514525	87.0943603302303	0	0	0	0	0	0
ENSG00000081019	24.2323632157858	25.9335503964732	24.8731943719903	53.1156987327825	20.8035231847606	0	0	0	0	0	0	0
ENSG00000081026	0	0	0	0	0	0	0	0	0	0	0	0
ENSG00000081051	0	0	0	0	0	0	0	0	0	0	0	0
ENSG00000081052	0	0	0	0	0	0	112.859573897742	52.2253788857825	98.7440200115948	65.1820845932064	50.5330032725813	0
ENSG00000081087	0	0	0	0	0	0	344.763281933925	132.399902915531	262.909884993033	227.042242474746	226.62312114036	0
ENSG00000081138	0	1.45314378906019	3.24216694937451	0	0	0	-0.582895004600686	5.12055362196354	8.11925429753734	20.4785258734757	18.9306141626691	0
ENSG00000081148	0	0	0	0	0	0	0	0	0	0	0	0
ENSG00000081154	53.9832414221619	48.7968985705056	42.5776980131397	92.9587950266511	71.0209702882654	58.9547609676157	0	0	0	0	0	0
ENSG00000081181	6.17964128542032	14.2866389748779	8.51305622011215	0	4.43860871047986	0	0	0	0.333155919756193	6.03189149080209	5.99131194871356	0
ENSG00000081189	0	0	0	0	0	0	0	0	0	0	0	0
ENSG00000081237	0	0	0	0	0	0	0	0	0	0	0	0
ENSG00000081248	0	1.42645683842606	2.35750843920565	0	0	0	9.05251490942274	3.14671727327469	13.9796986787023	4.83248631769856	7.85839081935351	0
ENSG00000081277	0	2.64225025767953	2.65722908479586	0	0	0	0	6.84112211348337	25.5680001235744	17.9616751436723	26.2868135024871	43.6460853883903
ENSG00000081307	0	0	0	0	0	0	0	0	0	0	0	0
ENSG00000081320	0	0	0	0	0	0	0	0	0	0	0.419752424347482	0
ENSG00000081377	29.4146990099089	33.0479598684391	31.3457916698963	18.5240086678661	18.2255459319282	24.7196166887687	0	2.654114245409	11.5934216950637	17.3343391793769	15.6285861161282	0
ENSG00000081386	3.3187317784357	8.87046921938415	6.68099877594575	17.1431127159396	11.0574874782197	0	0	0	0	0	0	0
ENSG00000081479	2.57065118447088	3.83549853661739	5.41326749269601	0	0	0	211.368362912778	79.233765893226	150.793749701241	106.612377702232	120.217657298302	161.707234512081
ENSG00000081692	40.6558922435616	41.9628658861265	38.7134227530117	0	14.3473101869151	0	0	0	0	0	0	0
ENSG00000081721	20.0683458739288	23.7517330023631	21.1389905606419	40.9358199050006	25.7435756589606	40.6488169300114	0	0	0	0	0	0
ENSG00000081760	15.4222065658891	21.381318105787	27.0869296700813	0	2.81925793966876	41.9682186168074	0	0	0	0	0	0
ENSG00000081791	26.6083654358435	31.1784077748824	28.2745655767677	26.8992124606382	24.6494793965097	51.290529030409	0	0	0	0	0	0
ENSG00000081800	0	0	0	0	0	0	0	0	0	0	0	0
ENSG00000081803	20.8471843712897	25.9078983620368	25.2464479262765	0	8.15128391302679	0	0	0	0	42.7165465887264	33.3357566063799	0
ENSG00000081842	0	0	0	0	0	0	0	0	0	0	0	0
ENSG00000081853	0	0	0	0	0	0	0	0	0	0	0	0
ENSG00000081870	20.2504519286417	30.2323591579463	24.8422831774011	0	17.5698200460887	16.7604090997099	0	0	0	0	0	0
ENSG00000081913	32.4376941073939	39.4324312863227	32.4083912666963	18.2622052476024	12.4558848754228	0	0	0	0	0	0	0
ENSG00000081923	3.36033205059579	9.1907413670441	7.07860105695376	0	0	0	99.7043408428109	43.1637959792346	102.909209715965	109.40823628149	114.399890211341	73.2188703607659
ENSG00000081985	0	0	0	0	0	0	0	6.10161268853734	23.7550254467649	29.4172255752475	28.818949700254	0
ENSG00000082014	0	0	0.392918073200942	0	0	0	25.1251648010523	10.6862789145846	35.4501947388683	15.0599612135458	16.3980973127342	0
ENSG00000082068	0	0	0	0	0	0	0	0	0	0	0	0
ENSG00000082074	0	0	0	0	0	0	0	0	0	0	0	0
ENSG00000082126	16.2726040691956	8.08994380226513	10.4360020332178	16.5637728630747	25.3821104030799	0	0	0	0	0	0	0
ENSG00000082146	0	0	0	0	0	0	0	0	0	0	0	0
ENSG00000082153	37.1059311562105	33.8914003476296	28.8374837778654	41.9992398506169	29.740951421913	14.6567880140184	0	0	0	0	0	0
ENSG00000082175	0	0	0	0	0	0	110.440762470079	47.893416611495	101.796667058385	96.1255413443784	96.1792631191642	0
ENSG00000082212	12.9439829353364	25.944434604866	20.9477701601014	18.2211316186835	7.27746722449529	21.7410856068633	0	0	3.05442684205286	0	0	0
ENSG00000082213	19.4116443216949	26.5468892102963	20.3314702977531	38.8729604542029	25.9826675745697	32.7802999382711	0	0	0	0	0	0
ENSG00000082258	39.459906223716	30.9747667257956	30.6325664220593	47.3871152909612	41.5428449296479	99.2233339289017	0	0	0	0	0	0
ENSG00000082269	25.6343963088609	35.0216836257717	31.2961436440789	45.6465385037037	22.7707008422789	0	0	0	0	0	0	0
ENSG00000082293	0	0	1.51767868463237	0	0	0	75.1176641518992	27.1717101912535	66.8516784157101	56.5740810044678	55.7979885499159	0
ENSG00000082397	0	0.541043051695052	0.239312672628918	0	0	0	55.2751924658507	27.4753802840016	67.4794959778627	23.812753764195	30.5497511792431	39.3128827700448
ENSG00000082438	3.63535022330598	6.80470459119663	4.95363775103794	0	5.10933294937995	0	0	0	0.443150112458194	2.39601812109726	-0.263817322112576	0
ENSG00000082482	0	0	0	0	0	0	0	0	0	0	0	0
ENSG00000082512	0	-0.373017554833968	1.45259733564876	0	0	0	0	-0.0565734889839177	14.0136320120797	8.36701215306934	6.64035908033428	0
ENSG00000082515	13.5401485310056	12.2636492244011	15.2919202031865	25.1256113783161	16.2148954616478	24.8540084238341	0	0	0	0	0	0
ENSG00000082516	8.41730018125988	18.5144133264214	17.6498924862354	0	0	0	0	0	0	0	0	0
ENSG00000082556	0	0	0	0	0	0	53.7793762387465	20.489303764305	47.5828567846829	35.0045144427246	39.9208495246359	0
ENSG00000082641	64.7466194694564	59.6251715333229	51.1255675575388	111.138958767676	71.5443521877452	78.1466828794911	0	0	0	0	0	0
ENSG00000082684	15.4003132582751	31.0820439500731	23.1007432215212	0	4.8601404615157	0	0	2.26797553226457	8.64419949150762	9.69877548347718	10.9326952313595	0
ENSG00000082781	107.033752725832	29.7037537617043	32.211236464331	57.8923583247619	34.1774243003585	179.400281626966	0	0	0	0.941003946443082	2.1806110365709	0
ENSG00000082805	21.0822999139054	26.621515143015	21.5776588020278	0	16.1938857941484	24.3493575581944	0	0	0	15.3896984048528	8.70600866473133	0
ENSG00000082898	66.8259224638438	58.9755337472208	46.5633170203987	122.120931863943	64.1203086813481	202.642211036468	0	0	0	0	0	0
ENSG00000082929	0	0	0	0	0	0	0	0	0	0	0	0
ENSG00000082996	17.6037993510333	30.5111205940469	24.461353271928	39.6922091767766	29.7355261529327	82.3380190867266	0	0	0	0	0	0
ENSG00000083067	3.97381797150357	5.43142221020574	4.67005306040095	18.493203446177	8.1954834646705	22.8683210358972	0	0	0	6.91899228524085	6.87536588860545	0
ENSG00000083093	31.8323015021267	37.2091776963977	32.8757699362797	48.1362585800633	47.1122368550459	0	0	0	0	0	0	0
ENSG00000083097	27.1294238028331	31.2157207412417	26.5670970269337	66.7013408768483	29.7416781607947	0	0	0	0	0	0	0
ENSG00000083099	14.0430513943035	14.2061875634654	15.7245506759546	32.8407716256288	23.5702006114504	67.8535305353677	0	0	0	0	0	0
ENSG00000083123	5.73690111763227	6.00744805766951	3.82005242091721	19.3812977792653	13.177546719287	0	0	0	0	0	0	0
ENSG00000083223	21.7214919277972	23.2928269204511	18.4224132263673	22.6774408769386	24.4353233736043	44.0889872668077	0	0	7.01033515037187	5.6704774852086	4.23657995192546	0
ENSG00000083290	3.49435987667407	6.6355546975363	7.98478930543497	0	0	0	49.1191904795876	23.7751778891135	60.0971271032959	26.4994424359618	25.6952502517897	0
ENSG00000083307	66.2168001695282	67.9670353564651	62.1173955783332	53.9011089935736	28.0367908576121	102.564600023507	0	0	0	22.4311721173291	10.0249612278693	0
ENSG00000083312	21.6865588252152	27.715262178328	24.9954247341299	38.046476564493	20.0166521217532	16.6424754019554	0	0	0	0	1.8187875133814	0
ENSG00000083444	11.4959912224032	9.03986795716407	8.55005970921896	36.4783456266098	30.7864607865105	47.6848757568051	0	0	0	0	0	0
ENSG00000083454	0	3.09855989179344	3.08152219642921	0	0	0	48.8513338706926	15.7488107746173	53.2014545534958	22.5963191465866	28.8529585877365	0
ENSG00000083457	10.3571451195844	4.30113893206361	4.25747046828526	0	0	0	0	0	0	0	0	0
ENSG00000083520	14.1449742892941	15.3085748767312	11.4540815234148	32.9361347016419	21.2621679354073	0	0	0	0	0	0	0
ENSG00000083535	14.1449742892941	15.3085748767312	11.4540815234148	32.9361347016419	21.2621679354073	0	0	0	0	0	0	0
ENSG00000083544	38.2745492476062	56.2700812181955	48.5737102637146	38.4802553238074	27.3383188978922	59.9737968433056	0	0	0	0	0	0
ENSG00000083720	7.56003855511708	14.5459841974708	14.6807683924884	0	5.17987112869073	0	0	9.15145277369278	18.7453526005249	22.8545668741764	18.6745978921937	0
ENSG00000083750	3.41717633549217	3.60953351160987	6.02132142185427	14.1255666042774	8.99538606514535	0	0	0	0	0	0	0
ENSG00000083782	0	0	0	0	0	0	0	0	0	0	0	0
ENSG00000083799	0	4.23796435839019	4.11096787972417	0	0	0	0	0	0	0	-1.66157609904051	0
ENSG00000083807	5.19965611936164	3.13276596403197	4.73609581354309	0.413241944854982	4.76397245192439	0	0	0	0	0	0.495673707808729	0
ENSG00000083812	0	0	0	0	0	0	0	3.77461211622115	11.0100980234488	6.58869822672579	5.39624827367559	0
ENSG00000083814	7.52596475161876	8.20893323080904	7.70380549107302	0	4.04303734694183	0	0	0	0.722473679661433	0	2.89614508626705	0
ENSG00000083817	8.14867768212456	8.12419981322789	8.04895379851683	0	6.40292379708217	0	0	0	0	0	0	0
ENSG00000083828	10.6419542500008	13.5991588570045	11.6493580657199	0	0	0	0	0	0	0	0	0
ENSG00000083838	14.3952436017718	25.2393164923332	20.2649517841557	37.5282279904506	21.614503094119	75.900941183904	0	0	1.59524912385169	0	-0.0635327780601149	0
ENSG00000083842	30.3881012899127	35.1569443886955	26.1006460450367	50.0304929652875	36.231547583401	36.5158073186361	0	0	0	0	0	0
ENSG00000083844	18.5700024798544	15.8364035494429	17.5253200201922	0	0	22.6159956030773	0	0	0	0	0.75349469142677	0
ENSG00000083845	53.2323506559893	67.2915082653765	56.2835914941244	81.4266123670364	52.0080812230198	77.4747242041641	0	0	0	0	0	0
ENSG00000083857	38.6269391380404	30.6249270677342	25.7288069069676	10.7237537517701	6.66521415141794	0	0	0	4.16362904470432	13.6395853884894	20.7450692696343	0
ENSG00000083896	0	0	0	0	0	0	0	0	0	0	0	0
ENSG00000083937	20.3596329608196	24.8778930510497	23.0331764720287	19.853562583644	27.9056456804442	26.3350449461314	0	0	5.83411325853866	0	0	0
ENSG00000084070	0	0	0	0	0	0	0	0	0.664809403485662	0	0	0
ENSG00000084072	0	0	0	0	0	0	253.178657887725	97.6519153214961	174.921703580086	113.949779586072	105.288588726691	188.864211222256
ENSG00000084073	37.4172876214634	40.9304071633466	33.0532602197303	61.3394640009633	41.1911476927548	68.3197216002497	0	0	0	0	0	0
ENSG00000084090	44.9519125357014	43.5236835227439	36.0027197945625	41.7759224754175	38.2632077211808	18.0055782264982	0	0	0	0	0	0
ENSG00000084092	18.7889313911891	20.1709718302148	19.1840911165826	36.968457661749	27.2716562009859	21.7410856068633	0	0	0	0	0	0
ENSG00000084093	49.3590487241552	45.3980723760698	37.1422362987552	8.47675784317913	15.134637105215	32.5082008714505	0	7.50585712564761	15.6065958365918	21.6397767920281	28.0098213534654	0
ENSG00000084110	0	0	0	0	0	0	0	0	0	0	0	0
ENSG00000084207	75.1632111054996	67.2149423357879	61.235465725384	32.0419656965683	21.1056040404766	15.5729701274888	0	0	0	2.89179797828939	2.35936005192822	0
ENSG00000084444	4.04892520018323	8.93188077311948	8.4320396122604	0	0	0	0	0	0	5.00871739786767	4.17911288479847	0
ENSG00000084463	15.3373054806326	16.7964432688926	18.0020671053898	53.9704002603271	33.1934721021586	0	0	0	0	0	0	0
ENSG00000084623	14.3235890614344	27.5464629931228	27.6728100524456	26.4198123450093	21.9746184119246	50.4955865878233	0	0	0	0	0	0
ENSG00000084652	38.5772455502398	42.5566432125525	38.1733695347035	35.6876581982652	40.1644494206744	22.3636701702574	0	0	0	0	0	0
ENSG00000084674	0	3.92256212478913	4.52159571147924	0	0	0	0	5.9957956612172	16.5676910611574	13.6567683320649	13.4104334141998	0
ENSG00000084676	10.5830336526022	16.5119306405315	12.2310130980458	0	0	12.5367088910161	0	2.55795980922124	16.684799408772	24.9028355307363	20.5772101975326	0
ENSG00000084693	0	0	0	0	0	0	0	0	0	0	0	0
ENSG00000084731	15.7907830876043	32.0008565608177	29.0557175153625	0	12.6747024169964	47.555021650044	0	0	0	0	0	0
ENSG00000084733	58.2627714518168	49.7239202794215	42.6944785176522	55.4231750628617	36.7119287404288	122.690257373008	0	0	0	0	0	0
ENSG00000084734	6.50132395257084	8.44713078604523	6.95282771182467	0	4.98356376129627	0	0	8.7740717938435	23.535764547512	24.05202051705	14.807494607071	0
ENSG00000084754	29.228710208115	26.9044743243156	24.0723779144807	64.0499138686677	30.2669856083478	28.8089251623971	0	0	0	0	0	0
ENSG00000084774	45.7887935918813	51.7207771639549	44.6563918208925	117.041597365322	58.0019493924257	33.7365101421281	0	0	0	0	0	0
ENSG00000085063	0	8.03791294858635	6.94185422754971	0	8.1954834646705	0	23.8003846871508	11.1730843877709	39.8391415024866	10.2712542322855	7.98849873791111	0
ENSG00000085117	7.80297019348757	6.96763931064535	7.94559448509044	0	9.33883835590974	0	0	1.283473309996	7.97079398785229	7.2327692870363	9.92493270105512	0
ENSG00000085231	28.4405954201443	21.1526163770337	21.669677754032	51.5397255335822	31.6737205499056	44.4246781710876	0	0	0	0	0	0
ENSG00000085265	0	0	0	0	0	0	0	0	0	0	0	0
ENSG00000085274	62.3999403182371	65.3187794348089	60.6662985896958	97.0911170960473	62.8330949732431	158.404383391847	0	0	0	0	0	0
ENSG00000085276	4.95588041412663	8.35430147859531	11.2681505120366	0	0	0	99.6237242423355	42.4890336844892	71.8312594660717	89.0070361427291	95.1161556625202	110.832940524305
ENSG00000085365	20.2504519286417	27.4439639289503	23.6438644388835	18.816617309819	22.2453933947257	45.3170088292872	0	0	0	0	0	0
ENSG00000085377	15.3292121649921	22.0039876809424	21.3762836356986	27.9079400966286	16.3895134515777	0	0	0	0	4.67786647214454	0.595933981318569	0
ENSG00000085382	9.81933327433507	11.9286092506975	10.1507548377688	0	0	0	0	0	0	0	0	0
ENSG00000085415	28.6908983628656	32.222404188383	28.2623912134068	36.0521456908261	15.5801792433077	77.7435076742949	0	0	0	0	0	0
ENSG00000085433	0	3.61239746199169	4.17222704007161	0	0	0	0	0	0	0	1.2533296416702	0
ENSG00000085449	5.83798883416973	9.47214710128433	7.67289429648386	14.3017611381034	19.3833893811765	0	0	0	0	0	0.0179923823032712	0
ENSG00000085465	0	0	0	0	0	0	0	0	0	0	0.878474768861578	0
ENSG00000085491	17.3117910694343	12.4222318511707	9.65668533756007	0	0	0	0	9.5785859194263	7.12476899483762	17.2833472158586	16.1584781996059	0
ENSG00000085514	3.4608529201545	7.10585543416371	8.22739465434121	9.61492962733699	1.44259694884676	0	0	0	0	0	0	0
ENSG00000085563	0	0	0	0	0	0	0	0	0	0	0	0
ENSG00000085644	48.4278183931794	35.8316947562539	29.2444544744875	37.8462835876076	28.888144400881	21.5052182113543	0	0	0	0	0	0
ENSG00000085662	4.10784579758185	12.3343915394688	9.68149790812513	0	4.74223604554335	0	0	0	8.1032818945627	6.89128215796191	6.0297239203517	0
ENSG00000085719	0	0	0	0	0	0	0	0	0	0	0	0
ENSG00000085721	0	0	0	0	0	0	0	0	0	0	0	0
ENSG00000085760	16.9923412885408	20.5775308425163	22.03098484819	26.2138986882898	23.6227811244293	21.3708264762889	0	0	0	0	0	0
ENSG00000085788	0	0	0	0	0	0	0	0	0	0	0.811633080771285	0
ENSG00000085831	0	2.05301003123246	2.63053825417051	0	0	0	0	7.00467895002977	25.2271347167114	18.2698011003642	22.6955216023243	0
ENSG00000085832	6.25852633160061	12.9500605238825	10.6448243379776	10.9958255792635	5.63778914045589	0	0	0	0	0	0	0
ENSG00000085840	61.958739914587	44.3842219985687	37.5219381138021	95.9799085181737	60.6832191058365	106.283649366561	0	0	0	0	0	0
ENSG00000085871	10.6009208248195	5.47106534715565	9.09376713646238	15.3489748191581	0	0	0	0	0	0	0	0
ENSG00000085872	44.2658257379582	44.2997685155609	39.1902229981985	35.1605721566036	31.2573444506101	33.1594057571234	0	0	0	0	0	0
ENSG00000085978	2.41234341147105	13.040231006175	11.1988608519917	8.64727562026546	7.0586496829216	59.5185200895987	0	0	0	0	0	0
ENSG00000085982	17.8319955659079	21.8812824389292	16.6222793457503	35.3137438977197	14.8236296828692	30.0203857358286	0	0	0	0	0	0
ENSG00000085998	13.4055538579486	15.4438356396549	18.2006363239722	0	12.3464761046359	0	0	0	0	0	0	0
ENSG00000086015	0	0	0	0	0	0	0	0	0	0	0	0
ENSG00000086061	42.6498838503658	51.5685970620719	42.5675639477055	85.2972283953225	45.2776578524587	48.9345825118977	0	0	0	0	0	0
ENSG00000086062	0	6.80657497975899	6.19441943129083	0	0	0	0	14.8624144252316	30.7813872994914	16.6227590988285	14.4777021132785	0
ENSG00000086065	7.96382257428818	14.807174961986	16.52078629245	0	19.2747073492713	0	0	0	0	0	0	0
ENSG00000086102	53.2566306029108	39.798570438144	35.3999858271048	52.974528615421	34.220170374239	0	0	0	0	0	0	0
ENSG00000086159	0	0	3.37094673871879	0	0	0	0	4.91636768752453	19.0862180073879	11.7509217357313	13.8200969647403	18.3872868471437
ENSG00000086189	26.7192148862553	32.4298127717956	29.3424941494994	51.580856859635	43.5398193219037	31.8626177662769	0	0	0	0	0	0
ENSG00000086200	17.3025640598362	21.9526836120696	20.3679933878358	38.0772817861821	29.0192895780488	21.2364347412235	0	0	0	0	0	0
ENSG00000086232	15.4291661875721	17.1377071098077	15.7162133148198	19.4018345937247	14.5534809712273	0	0	0	0	0	0	0
ENSG00000086288	0	0	0	0	0	0	0	0	0	0	0	0
ENSG00000086289	9.8106731117158	7.17892791982195	9.95079408765672	0	0	0	0	0	0	0	0	0
ENSG00000086300	2.49497710881248	4.39908672862806	2.99957144449289	0	0	0	0	0	0	0	0	0
ENSG00000086544	35.453729583196	52.638245510009	39.3450974425957	86.0621018416541	40.9730568900627	59.2497366194679	0	0	3.45807677528326	0	0	0
ENSG00000086548	0	0	0	0	0	0	0	0	0	0	0.279974608356014	0
ENSG00000086570	0	0	0	0	0	0	0	0	0	2.10201830949351	2.22252343254969	0
ENSG00000086589	46.0935796714836	36.1694799006348	33.1343963037128	61.1771818165419	33.5130745065722	63.9988903004318	0	0	0	0	0	0
ENSG00000086598	27.3056187480502	18.2819814904634	17.3885731907882	15.390048448077	15.777987117382	14.1521371483787	0	0	0	0	0	0
ENSG00000086619	0	0	1.8807613540081	0	0	0	0	11.3277013851164	32.8316999908611	27.7596563900083	23.9047534827051	0
ENSG00000086666	28.0109653758974	43.4498343135554	35.8322558228225	48.7907671307225	33.7615256235922	54.15112641456	0	0	0	2.21784397685701	2.20255517312233	0
ENSG00000086696	0	0	0	0	0	0	0	0	0	0	0	0
ENSG00000086712	5.19042910976362	13.3939325025433	13.7249321181898	24.430029198738	4.74223604554335	15.3973062751671	0	20.4098192402241	0	0	0	0
ENSG00000086717	2.36847575139596	5.23319644648625	3.09603866369365	0	0	0	0	0	0	0	0	0
ENSG00000086758	28.2536073871749	22.83576722821	20.6199442676688	30.8006337106135	19.8195709865606	0	0	0	0	0	1.60287892574214	0
ENSG00000086827	15.756709284106	17.8381095118025	16.4664540588255	26.7888475649658	15.1439976379236	0	0	0	0	1.23250382676762	1.34308206500002	0
ENSG00000086967	20.9736857287062	32.0886968725196	31.0774460627385	0	6.09716062998431	0	0	0	-0.145830917903718	2.31704356785315	5.55817971440503	0
ENSG00000086991	0	0	0	0	0	0	0	0	0	0	0	0
ENSG00000087053	52.0782359885007	50.6748176230473	37.5944678082849	92.5152626447628	61.9060463688428	81.6909105786574	0	0	0	0	0	0
ENSG00000087074	17.999817372043	14.6462621646259	15.4834631100583	81.316247471364	28.8453983270005	0	0	0	0	0	0	0
ENSG00000087077	69.7692978896173	62.8683497411864	53.3807763940293	60.3838677309226	66.4848816074823	55.4493046188319	0	0	0	0	0	0
ENSG00000087085	0	0	0	0	0	0	139.319321724948	55.0981345068062	103.945386891865	42.5020781975749	47.3573025543313	0
ENSG00000087087	51.8384108785546	43.351886516991	36.6143354491039	62.176216297903	42.305518329241	43.2133877435957	0	0	0	0	0	0
ENSG00000087088	36.7784181341167	47.8861947388918	34.8200710842077	27.9123093572787	28.490735557278	0	0	0	0	0	0	0
ENSG00000087111	9.96501037829912	15.074626445836	15.5927690299148	0	9.83190102692398	0	0	0	8.81162856569159	11.8391653878767	7.41181385205506	0
ENSG00000087128	0	0	0	0	0	0	0	0	0	0	0	0
ENSG00000087157	14.5476246145077	19.8779051640517	20.993197821955	11.963479586335	12.2595304791117	0	0	0	0	0	0	0
ENSG00000087191	57.0282731413395	49.6640621727466	47.3144197083924	99.3474545203919	70.1452280516605	32.3250231845642	0	0	0	0	0	0
ENSG00000087237	0	0	0.733662476767683	0	0	0	0	0	0	0	0	0
ENSG00000087245	3.93108400538598	6.34171130784296	10.617669663509	0	3.43078427386448	0	31.8322334180005	20.5547736464372	36.8595194824474	29.1523220877858	29.7903288564441	0
ENSG00000087250	0	0	0	0	0	0	100.562220170717	45.9166226706181	91.5880766080024	47.6133912909581	54.7808323619285	61.1774471247751
ENSG00000087253	0	3.15841799846838	0	0	0	0	0	0	0	5.03642752514662	2.76603716770945	0
ENSG00000087263	21.1239001860655	33.7211567889371	27.6788808057079	46.2188997965251	25.1313140313008	0	0	0	0	0	0	0
ENSG00000087266	0	8.19882574594653	4.80165183815469	0	3.14675751314766	0	0	6.49927104651025	22.9630863308789	16.6737510623467	14.117854467213	0
ENSG00000087269	26.6251189141033	38.079823657085	29.5507375879451	12.5076232413219	8.47878348650569	20.3615247450095	0	0	0	11.7248822100766	8.66191090344193	0
ENSG00000087274	12.8769690222972	19.6097138087948	17.144112466509	0	0	0	0	0	0	0	0	0
ENSG00000087299	20.1312015239779	26.5196832313899	25.23520145281	42.4408468707278	42.1575640969178	26.3698857059782	0	0	0	0	0	0
ENSG00000087301	2.78958009580559	9.31356447451476	8.89004986622969	8.36493538554232	5.09219876428493	0	0	0.871658955505335	6.79058449783176	1.58496598710584	3.07585942111322	0
ENSG00000087302	21.5190240426173	25.8231649444557	24.3917630789857	39.4376409236492	46.9593552714969	0	0	0	0	0	0	0
ENSG00000087303	0	0	0	0	0	0	60.3922518669884	23.1832288186344	47.9495508545471	31.6102509815693	45.305439116034	46.7376789137827
ENSG00000087338	16.9161003659037	19.6330356726406	18.759334161106	35.2153933938865	25.9391947618076	50.415619034195	0	0	0	0	0	0
ENSG00000087365	15.966761134685	30.9447567326812	24.3015472514516	4.45811544665076	-1.08303817241875	9.23981844058721	0	0	0	0	0	0
ENSG00000087448	38.0394337049904	53.3137726010976	41.3040530284196	16.0650938131957	26.7920017828397	0	0	0	0	0	0	0
ENSG00000087460	28.3537828783632	42.5281620278041	46.545980932402	0	15.5246550625477	0	0	0	0	12.8792101279366	15.6909353380128	0
ENSG00000087470	14.9340883084403	22.0257560977278	20.9739971468835	25.166685007235	16.2801046807909	16.3901499691356	0	0	0	0	0	0
ENSG00000087494	0	0	0	0	0	0	107.411171724794	47.2911315198562	78.0977452281299	171.679750362491	165.746083465445	193.814726715085
ENSG00000087495	0	0	0	0	0	0	34.8780280585027	19.3502034631596	46.3057820036958	56.7102647391783	53.3249363310903	0
ENSG00000087502	18.5457225329328	17.8132342008963	16.2407301657745	43.1568184273441	28.146199628399	0	0	0	0	0	0	0
ENSG00000087510	-0.125934510437764	0.0614115537353288	1.8807613540081	0	0	0	174.503164683423	70.535778768506	130.518842690191	108.98355588277	121.903099532224	158.110556420531
ENSG00000087586	70.3916598801492	47.7882862119784	49.3328555794911	50.009956150828	54.71720365302	79.8306707226754	0	0	0	0	0	0
ENSG00000087589	0	0	0	0	0	0	0	0	0	0	0	0
ENSG00000087842	5.55204600979588	5.94836667452478	7.38112765029075	41.6450207652857	19.2080446523649	0	0	40.4154598158643	0	0	0	0
ENSG00000087884	74.6323998098518	72.0559574222958	61.10068748723	59.2835226839181	42.1084371940484	105.274347635282	0	0	0	0	0	0
ENSG00000087916	0	0	0	0	0	0	0	34.5315593239421	0	0	0	0
ENSG00000088002	9.9290811534918	12.1042898741014	12.9475366997155	6.31926247572685	8.65340147643566	24.7196166887687	0	0	0	0	0	0
ENSG00000088035	14.9086746675612	16.7210406126437	15.4548940193726	12.0943812964669	12.7623747814022	0	0	0	0	5.03642752514662	3.92129190118043	0
ENSG00000088038	41.9953645042767	36.4598013961207	31.6600287827509	10.3105118069151	18.0726643483792	27.5802140729197	0	0	0	0	0	0
ENSG00000088053	1.85664439400439	0	1.42321494388205	0	0	0	0	0	0	0	0	0
ENSG00000088179	43.7757679756439	46.0283428469091	40.9467303576148	50.3231016072403	48.2070513017959	105.828372612854	0	0	0	0	0	0
ENSG00000088205	8.81185719083296	10.0497263958085	11.2550484609892	25.8006567434348	17.5915564524698	0	0	0	0	0	0	0
ENSG00000088247	18.0754914477014	20.4943508719956	16.5414013837385	0	10.8393966755277	26.7053040767057	0	0	0	0	0.735502309123499	0
ENSG00000088256	0	7.20224978366776	4.87611243453717	0	6.53406897425005	0	0	0	0	0	1.70885734243769	0
ENSG00000088298	17.537679602452	19.9144414068808	15.5209367725148	15.9547289175233	12.5210940945659	21.6231519091088	0	0	0	0	0	0
ENSG00000088320	0	0	0	0	0	0	71.1649345398052	25.5413223373514	74.0691078550404	28.2450949743155	40.7388702292401	65.1747279916527
ENSG00000088325	32.6219823682516	28.9551541849575	28.5991216776103	35.2051249866567	20.2579328085896	29.9197025541201	0	0	0	0	0	0
ENSG00000088340	0	0	0	0	0	0	0	0	0	0	0.796011501725291	0
ENSG00000088356	18.3388769285985	16.6429901993677	14.1388455512231	0	11.862824403988	0	0	0	0	0	0.232656446441711	0
ENSG00000088367	0	0	0	0	0	0	17.1716800128017	8.56145169668658	14.6108759481539	6.67295349287556	8.28832393152124	19.0044270239948
ENSG00000088386	0	0	0	0	0	0	62.6463521043931	13.7636612692742	53.231956919048	29.4283096261591	27.1941266379604	0
ENSG00000088451	25.3576804940851	25.4173826556844	25.6524680505248	20.3386833791071	23.1199368221388	9.44024411135612	0	0	0	0	0.0919377886404374	0
ENSG00000088543	11.3640543561078	14.9502130391817	11.35478547178	14.5532961511373	16.7604858378187	0	0	0	0	0	0	0
ENSG00000088727	23.4923759374615	25.4546956220437	21.6596095539641	56.9144359104606	26.7036026795522	41.9846766541183	0	0	0	0	0	0
ENSG00000088756	37.5449226728374	33.2314178061149	32.7980395483072	44.2040321083988	34.3745054355512	58.7450857538282	0	0	0	0	0	0
ENSG00000088766	19.0131004464104	21.548857809982	19.869148412283	0	14.8961736605551	0	0	0	0	0	0	0
ENSG00000088782	0	0	0	0	0	0	0	5.23768380593791	0	0	2.7243342599172	0
ENSG00000088808	3.98134444016534	4.74190401660362	4.50988519196158	0	0	0	63.1061487400291	23.5782812283535	63.9163311506112	58.6643189629897	60.6834922002004	0
ENSG00000088812	7.71948002207442	7.39736865326646	7.57454881722281	0	0	0	0	22.2756240906617	28.6852114919946	23.9612747170851	23.7807826837063	0
ENSG00000088826	0	0	0	0	0	0	0	0	0	0	0	0
ENSG00000088827	0	0	0	0	0	0	0	0	0	0	0	0
ENSG00000088832	26.7937873906586	30.0986518420829	29.5441751200777	4.26332115868167	14.3143805010359	0	0	0	1.34319976228312	2.66950572819137	4.19294402466704	0
ENSG00000088833	8.36590605252302	11.129482328608	9.78967564684356	11.8120410617437	11.4284598644607	0	0	0	0	0	1.89668467396672	0
ENSG00000088836	0	7.80372706141959	6.95865499061571	0	0	0	190.658042614738	75.0191597090144	152.865039309433	79.7210402398935	66.9197751651781	77.2407354824558
ENSG00000088876	2.64575841315054	3.23382065471721	3.25620653213302	0	0	0	34.9739980718733	15.5705165441906	39.7527546560217	15.8308329724837	15.8785035912499	0
ENSG00000088882	21.2671550217418	19.9789598547369	28.5583782235637	0	7.45208521442526	0	28.9890321988129	21.31095298349	30.4420825522939	26.3841736358063	41.1399607906371	37.9707670688221
ENSG00000088888	11.8273258196563	19.3119868014504	14.8072191185918	0	9.20044533036988	24.4672912559489	0	0	0	0	1.75690685797526	0
ENSG00000088899	32.9084920396042	25.8379327704994	21.9148531100745	18.5548138895553	21.1969587162642	24.3493575581944	0	0	4.04830049235277	1.57388193619426	4.67083483835903	0
ENSG00000088930	66.2331867737184	63.3148524965104	49.9742421651948	88.3668726334262	40.5985421711546	0	0	0	0	0	0	0
ENSG00000088970	5.85530915940826	9.17908043512119	8.32244745732494	0	10.7082514983598	19.8733319166807	0	0	0	2.97208965942748	2.6242834745939	0
ENSG00000088986	30.8571986811866	35.5992629202959	30.9922026345248	8.48556868844443	23.3822271764746	41.614417523544	0	0	0	0	0	0
ENSG00000088992	0	4.09280568348161	1.98144893717268	0	0	0	44.1088305464149	9.61385826186635	30.4641242127259	21.0495904704632	25.0378545914381	0
ENSG00000089009	21.2082344243432	22.651532567004	20.9889774579912	47.3303115048128	26.3319035544296	17.382993663104	0	0	0	0	0.12792255324698	0
ENSG00000089012	0	0	0	0	0	0	0	0	0	0	0	0
ENSG00000089022	57.6670843756484	52.8997892372403	47.7839645662137	76.7565441711628	50.1731184142313	22.5308370158605	0	0	0	0	0	0
ENSG00000089041	0	0	1.24338255652793	0	0	0	0	0	0	2.45448046983173	4.79678151448193	0
ENSG00000089048	29.0946823820367	30.7135441029664	29.5535435356919	56.360023848244	37.9132450024392	56.8773320636457	0	0	0	0	0	0
ENSG00000089050	2.48688379317196	8.71110986908437	7.67757850429092	16.629774282642	9.59388086187355	0	0	0	0	0	0	0
ENSG00000089053	27.8012634741607	32.0404996977676	27.068192838853	41.6552891725154	22.9453188322088	63.6928461863597	0	0	0	0	0	0
ENSG00000089057	0	0	0	0	0	0	0	0	0	0	0	0
ENSG00000089060	2.41930303315407	6.63400125047591	3.61587130684127	0	0	0	0	0	0	0	0	0
ENSG00000089063	21.8872224783004	23.5801913853188	23.9896218165019	26.29598985278	14.4772836048898	36.6082601435462	0	0	0	0	0	0
ENSG00000089091	16.7485655833058	16.5010464321388	18.7424755899381	50.6054418419635	16.565584919271	18.5102290921379	0	0	0	0	0	0
ENSG00000089094	195.793772537372	125.270683363115	117.74535042362	114.430270608999	106.173090467868	298.775277095124	0	0	0	0	0	0
ENSG00000089101	11.7591782126596	14.4239378135303	13.573204977678	32.0506279524082	12.7841111877833	0	0	0	0	0	0	0
ENSG00000089116	0	0	5.49758323322316	0	0	0	315.364362874161	109.831950479853	199.658582381505	199.672171821642	198.60571564707	388.216141101265
ENSG00000089123	11.7597450596384	17.9990223091627	18.229669258501	12.3253794950414	11.2763050197934	0	0	0	0	0	-0.299733379596827	0
ENSG00000089127	0	0	0	0	0	0	0	0	0	0	0	0
ENSG00000089154	39.5841547867632	37.2729194207236	35.2646534139178	62.5997266499877	32.3848646327702	43.3313214413502	0	0	0	0	0	0
ENSG00000089157	51.0946652805762	48.1005858709169	40.5824016937797	59.5283148648368	40.2999651750577	13.0287360644957	0	0	0	0	0	0
ENSG00000089169	0	0	0	0	0	0	0	0	1.83857592776753	1.28792408132551	1.92279005295286	0
ENSG00000089177	2.78958009580559	8.82304876816232	7.11653856325352	0	4.19591893049076	19.1163556182212	0	0	0	0	2.49219967891222	0
ENSG00000089195	16.9669276476618	23.3169521732301	19.9572890557804	26.7580423432766	22.1801841755826	27.07556320728	0	0	0	0	0	0
ENSG00000089199	0	2.61970511736392	2.99020302887876	0	0	0	0	0	10.4267743518339	11.0803633022058	6.84530875537115	0
ENSG00000089225	0	0	1.67704408377541	0	0	0	337.006541277257	130.649577683546	239.8316892454	253.785534030762	241.088339526334	381.984760313992
ENSG00000089234	23.0804986026498	19.0935460680059	19.3854662829118	24.9741728537248	27.4245377845348	25.4601349499174	0	0	0	0	0	0
ENSG00000089248	29.6729608054887	30.5984983097676	28.7588028175191	39.0141305715645	39.0928248580686	60.3769720485018	0	0	0	0	0	0
ENSG00000089250	0	0	0	0	0	0	0	0	0	0	1.29129028340082	0
ENSG00000089280	68.5263553235256	66.6758392809628	53.5678326964275	80.2869830209141	58.7377778546992	0	0	0	0	0	0	0
ENSG00000089289	7.18976149246556	7.66633673205359	9.804192114108	36.7271910559448	17.9407924323297	25.5780686476718	0	0	0	0	0	0
ENSG00000089335	11.0705850630722	10.4547319610496	10.5422584947527	45.3950034906697	23.4916359472614	30.8110705876451	0	0	0	0	0.089961911516356	0
ENSG00000089336	10.4622427570682	18.1020595789224	15.5108355571874	14.2506599904093	8.14569404389605	0	0	0	0	0	3.37801563163503	0
ENSG00000089351	10.4668929987412	6.12094040380786	7.65088767366558	0	0	0	0	0	0	0	0	0
ENSG00000089356	0	4.50072729324071	7.23901805350075	0	0	0	0	0	0	0	2.4892564409999	0
ENSG00000089472	0.316337966664191	0.436559751233232	1.08778504100012	0	1.90384137921555	0	0	0	0	0	0	0
ENSG00000089486	9.42420941778324	22.6764078779102	17.5857279931535	0	16.148959503623	17.5173853981694	0	4.9028400599392	13.6524142271511	8.99995622732735	8.89165063094975	0
ENSG00000089558	0	7.43701179021637	6.39440306609025	0	0	0	0	7.65310874153597	17.6276896927533	44.6650587870821	49.1980342042641	0
ENSG00000089597	33.7975600813303	30.5153183392469	27.5285451967259	39.6096162627	19.4485986003196	18.1399699615636	0	0	0	0	0	0
ENSG00000089639	32.8950638046694	47.1144446593333	39.9840236907702	19.7351010210969	10.7339955618379	34.6610472639352	0	0	0	0	0.437003390084309	0
ENSG00000089682	4.83803921932938	9.02982856968393	7.88456556611364	42.622943179587	13.3949107830974	0	0	30.3372635475979	0	0	0	0
ENSG00000089685	29.0503767314743	30.1656265054201	23.908231884484	7.96560954692968	11.044778346445	0	0	0	0	0	1.77268021981677	0
ENSG00000089692	4.52493126909077	11.6199118831139	11.7952318873442	0	0	0	66.1085857897253	19.4382664096324	51.3572381412896	18.2167692886672	21.6992671834979	41.1822596689942
ENSG00000089723	2.00742569834245	1.69697836427359	2.02968254677306	0	0	0	0	0	3.47165773059506	0	1.88066816878753	0
ENSG00000089737	8.85402430997179	11.1699021890881	10.445791275552	20.8622902196345	12.5000844270665	0	0	0	0	0	0	0
ENSG00000089775	119.148891248049	105.004570104674	84.2300108702472	83.0307041301051	73.5019022216066	83.5916171536484	0	0	0	0	0	0
ENSG00000089820	9.87910709687119	11.9373293040781	11.041675595758	0	0	0	0	0	0	0	0	0
ENSG00000089847	0	0	0	0	5.00452639987912	0	0	0	0	0	1.66299319221074	0
ENSG00000089876	0	0	0	0	0	0	0	0	0	0	0	41.9130457333666
ENSG00000089916	25.9482265530066	31.5885437976327	27.5973645200169	29.746909843476	18.4763813743805	0	0	0	0	2.88150596802751	2.1686062198937	0
ENSG00000090006	0	8.24546947363815	6.60607433572003	0	0	0	0	0	1.48234977032968	0.0770314891729762	0.597700370256112	0
ENSG00000090054	18.4111278598758	16.3657856692151	14.0808632574648	19.9459782487115	10.1177348316635	0	0	0	0	0	0	0
ENSG00000090060	49.0355087233458	48.5673204519018	41.8402885822302	99.1777318079327	64.3157518988399	45.1664567915859	0	0	0	0	0	0
ENSG00000090061	12.2633137919018	15.044769755681	12.0248717337427	6.24387263627614	0.225934477618678	2.05027092197933	0	0	0	0	0	0
ENSG00000090097	11.0370781065526	14.8056215149256	18.1383500909506	0	0	0	0	12.5315488164625	22.6527232895681	26.6645894652193	28.1075768929925	0
ENSG00000090104	0	0	0	0	0	0	0	0	0	0	0	0
ENSG00000090238	12.0336720437141	19.6314401697707	15.7099866243977	17.8194441102331	35.8559832207679	42.4870432967721	0	0	0	0	0	0
ENSG00000090263	20.9257845694673	24.8825277600869	24.6273291079918	53.8387880110074	37.8112891779592	0	0	0	0	1.43090029557034	0.597361471677444	0
ENSG00000090266	0	0	0	0	0	0	0	0	0	0	0	0
ENSG00000090273	23.6021238166182	19.5599631869824	19.4276241531754	41.0495350741502	27.3375921590106	0	0	0	0	0	0	0
ENSG00000090316	23.5345430566003	27.9337029117725	26.4860739626838	31.655335238158	25.763850032996	0	0	0	0	0	0	0
ENSG00000090339	0	2.08954627406158	2.31676498515911	0	0	0	104.083017544823	46.8601333376697	104.849314105174	47.2309366332377	51.6860726407416	70.3466824120708
ENSG00000090376	0	2.60493729132022	2.14442275335883	0	0	0	70.4999132567534	24.1298338317404	63.3143062734929	63.4812929387371	59.2706259712979	0
ENSG00000090382	0	0	0	0	0	0	0	0	0	0	0	0
ENSG00000090402	0	0	0	0	0	0	0	0	0	0	0	0
ENSG00000090432	4.72885818715141	8.09777105526129	9.51618198803545	4.66629469630692	5.72618824374332	0	0	0	0	2.57584816265102	1.75274561554055	0
ENSG00000090447	105.244689091846	120.840052951993	92.8758974357227	77.889678609622	58.1697243332656	121.96619714917	0	0	0	0	0	0
ENSG00000090470	8.44967344382195	12.0016817363557	11.6662166368878	15.2694151451749	7.91072996507205	0	0	0	0	0	0	0
ENSG00000090487	7.96325572730943	11.9052873868517	10.1175015392761	8.38547220000177	4.78570885830544	14.2865288834441	0	0	0	0	0	0
ENSG00000090512	0	0	0	0	0	0	0	0	0	0	0	0
ENSG00000090520	11.8354191352968	17.4844080154343	20.1160425080027	14.0989805773634	10.249606747713	0	0	0	0	0	0	0
ENSG00000090530	0	1.61069149963205	1.59836312342911	0	0	0	9.22355102262544	5.38964553312546	16.8101493259092	7.6610401824836	4.96859234083178	0
ENSG00000090534	2.6047249879692	0	4.22328948210607	0	0	0	36.5367784512012	17.601810749401	44.0299324578146	26.3010432539695	28.7550931677238	82.602271253152
ENSG00000090581	2.31012200097609	6.90685294691403	7.41672305268697	0	0	0	0	0	0	0	0	0
ENSG00000090612	16.0339919458606	21.866396747428	18.1369356747336	22.1328212758886	17.5690933072071	23.4744475619804	0	0	0	0	0	0
ENSG00000090621	20.4682471460189	20.3178935250615	19.6229006954804	0	10.1829440508066	0	0	0	1.45006760951448	0	0.457713066078106	0
ENSG00000090659	1.58802189486907	0	0	29.8021744818528	10.249606747713	0	0	0	0	0	0.535610226663434	0
ENSG00000090674	0	6.414007069971	4.19799018301046	0	0	0	0	0	5.24388954146915	0	0	0
ENSG00000090686	67.6745287539398	56.3325653765157	47.997619893655	60.5904650940224	62.2439764320325	154.233042265746	0	0	0	0	0	0
ENSG00000090861	36.2671235492637	30.7244283113591	29.1198820084444	71.1161005601213	35.1157234691515	0	0	0	0	0	0	0
ENSG00000090863	55.2149295604314	45.9428327057977	40.9289440987604	53.5879635371613	36.4068923122126	78.7528094055743	0	0	0	0	0	0
ENSG00000090889	2.84793384622547	4.59653576881735	5.73218881335772	0	12.6305028653527	0	0	0	0	0	0	0
ENSG00000090932	13.9296978819717	5.1748535335778	11.7502544310535	0	0	0	77.7769924320877	55.4426126102858	101.534435483219	83.4695824461878	82.0959413709442	93.097347473729
ENSG00000090971	12.0278007117949	26.7085787311867	23.8738086958983	16.4988725725101	21.0650868002147	0	0	2.14290878721005	4.53499681711951	0	0	0
ENSG00000090989	12.069400983955	11.6215514820208	10.5033933007665	0	5.33202597335803	0	0	0	0	4.14307433897335	5.09651489407876	0
ENSG00000091009	32.563061770853	45.0955086089562	38.5793896589518	55.8569538221761	34.1556878939775	51.1561372953436	0	0	0	0	0	0
ENSG00000091010	0	0	0	0	0	0	258.762858184988	103.791179155716	195.5082054592	233.676729576703	240.807953712236	429.104138824981
ENSG00000091039	23.4756224592017	33.524484472278	27.1478014868858	38.1876466818545	28.9982799105494	42.3384777473817	0	0	0	0	0	0
ENSG00000091073	0	0	0	0	0	0	0	0	0	0	0	0
ENSG00000091106	0	0	0	0	0	0	0	0	0	0	1.14142359360241	0
ENSG00000091127	31.6220327534112	38.792663714533	29.7005864683965	29.7123464006398	17.1539213693224	0	0	0	0	0	1.54495002458416	0
ENSG00000091128	0	0	0	0	0	0	0	0	0	0	0	0
ENSG00000091136	0	4.14923895538352	7.6481712296685	0	0	0	156.031983696248	70.8574306726582	120.376518552505	86.239487999312	101.580278471602	97.2785704888038
ENSG00000091137	0	0	0	0	0	0	122.229484823129	57.6029626029043	115.60106581153	161.605853079198	144.460768374715	172.918438168903
ENSG00000091138	0	0	0	0	0	0	0	0	0	0	0	0
ENSG00000091140	11.1040920195918	9.30268026612205	11.5093414447258	17.5255494391054	10.7082514983598	22.4816038680119	0	0	0	0	0	0
ENSG00000091157	6.05635089852569	7.64379159173797	8.09672356427396	9.83565941868178	11.4733861549861	52.2833727243775	0	0	0	0	0	0
ENSG00000091164	6.05635089852569	7.64379159173797	8.09672356427396	9.83565941868178	11.4733861549861	52.2833727243775	0	0	0	0	0	0
ENSG00000091181	26.7007929897617	32.5170243016065	29.374174992181	35.7390002344138	26.4413123252164	18.1235119242527	0	0	0	0	0	0
ENSG00000091317	8.6431887142776	9.71079272548393	12.5855298211038	0	5.96674219169805	24.3493575581944	0	0	0	0	0	0
ENSG00000091409	5.96668115338307	4.86609718530182	6.45094090811292	0	0	0	0	0	0	11.4571637836452	6.7747735066362	0
ENSG00000091428	0	0	0	0	0	0	47.6451286483435	20.0525080274391	45.5612666636023	41.2579334526876	38.4458931521407	0
ENSG00000091436	13.3044661414111	11.8438758331163	10.9422028796643	9.32232098538412	0	0	0	2.65218172718253	0	4.9422130923982	6.51354236541595	0
ENSG00000091482	0	0	0	0	0	0	0	27.4343103868821	0	0	0	0
ENSG00000091483	11.4062214752466	16.2033194247945	13.5877214449425	6.58106589599054	7.27746722449529	0	0	0	0	0	0.349758772258478	0
ENSG00000091490	0	5.06450633485416	6.92733776028527	4.38395446158379	9.3967997266809	10.4330878053246	0	3.87342182256689	15.5807174563121	15.538776224951	12.2273069128051	0
ENSG00000091513	0	0	0	0	0	0	69.4967068349486	25.0581766279442	81.9130481431853	0	37.4461826766926	77.6916310082996
ENSG00000091527	42.4503576802391	39.9011243459215	35.7872951361191	30.8420316109754	21.4679667677905	28.2269022775463	0	0	0	0	0	0
ENSG00000091536	9.28265512304319	3.47091283185641	3.85425629178369	0	0	0	0	0	0	0	0	0
ENSG00000091583	0	0	0	0	0	0	0	0	0	0	0	0
ENSG00000091592	0	0	0	0	0	0	0	0	0	0	0	0
ENSG00000091651	39.5852884807207	48.9659899413423	41.280168145541	62.0427270039165	53.3854689527234	63.9780876938014	0	0	0	0	0	0
ENSG00000091656	3.20898389927897	7.9259740495084	6.99196609721037	0	0	0	66.0687753330908	35.8808033261374	73.3797342176974	73.9077238837847	79.6435733557492	88.2889985888928
ENSG00000091664	0	1.77082757346202	0	0	0	0	31.1399870175812	7.73331601754844	28.4663555473403	31.4810065737586	33.9832728811111	0
ENSG00000091704	6.03312787077687	5.22023535644171	5.78592951560381	0	0	0	0	0	0	0	0	0
ENSG00000091732	16.5966505850103	15.516131401783	14.1201922952943	30.3668549512991	24.1248986878382	16.1378245363157	0	0	0	0	0.107954293819627	0
ENSG00000091831	0	0	0	0	0	0	0	0	0	0	0	0
ENSG00000091879	0	0	0	0	9.28811769477569	0	0	0	0	0	0	0
ENSG00000091947	27.4933816378986	41.0889242627045	34.3106398051845	50.6631513554586	38.9635880886222	111.968269065619	0	0	0	0	0	0
ENSG00000091986	4.50240280715493	2.54430246111509	1.53561304656429	0	2.31641363737825	0	0	0	0	0	0	0
ENSG00000092009	0	0	0	0	0	0	0	0	0	0	1.08556817605131	0
ENSG00000092010	3.76321707422313	8.37315323655919	8.10950840395572	0	0	2.72565295904053	0	0	21.531873599924	0	1.75889109979224	0
ENSG00000092020	56.9115656404997	47.2705650241291	43.5379166892685	140.782013901563	69.4235662077963	87.4196191811599	0	0	0	0	0	0
ENSG00000092036	28.3633552663317	20.6995772264568	17.3740567235237	27.7462331648076	22.8141736550409	0	0	0	0	0	0	0
ENSG00000092051	0	13.7840378589575	28.9074510830161	0	4.86104326309432	0	13.0643121314467	2.67851523515095	4.2957539869975	0.548322787079152	9.76178184027882	0
ENSG00000092054	7.55211284054596	4.88727255209455	7.33824157336754	0	0	0	0	0	4.32226819999964	0	1.37705293374456	0
ENSG00000092067	0.87401510440258	1.09452375884321	2.55888360553481	0	0	0	0	0	0	0	0	0
ENSG00000092068	21.4358234982971	18.9007573689978	27.5468181841109	26.7477739360469	33.6535703305686	62.2447257386843	0	0	0	0	0	0
ENSG00000092094	64.9487949025313	62.8442243619964	57.7232011653312	122.578831513484	71.7399798451745	126.274914980996	0	0	0	0	0	0
ENSG00000092096	6.59766059525977	18.185639711206	11.7268588226546	0	0	0	0	0.539258942239381	2.66179021595816	9.25434971392591	8.29924826599509	0
ENSG00000092098	41.9581116217103	56.573338866836	46.3713988781946	15.0254983108582	43.5810663116581	81.9723052877455	0	0	0	0	0	0
ENSG00000092108	28.8930737959405	24.4091457614827	19.8111738107622	58.8394755173739	39.9680950243633	78.9722187637723	0	0	0	0	0	0
ENSG00000092140	25.9365257645158	25.1468611298369	20.2190721950708	28.0080365850713	30.899521610043	40.1004649266248	0	0	0	0	1.34110618787594	0
ENSG00000092148	52.7708062191816	57.5738285839517	43.8687214770312	43.5854892294265	32.5111689903474	70.3419225343392	0	0	0	2.02489276584576	0	0
ENSG00000092199	75.8420513264289	65.9148020487629	57.1434243930655	128.333413519764	68.0469052169743	29.8017688563656	0	0	0	0	0	0
ENSG00000092200	0	0	0	0	0	0	0	0	0	0	0	0
ENSG00000092201	65.0233352842322	47.3319765778645	41.8829021129987	105.253475051264	64.2886213696309	63.9616296564905	0	0	0	0	0	0
ENSG00000092203	6.77586515270695	10.7656385603147	9.82852344832832	15.400308033269	20.5893934924392	0	0	0	0	0	0	0
ENSG00000092208	5.15805584720155	10.4454011997173	10.7764231157314	22.243186171561	19.8637705382043	29.0777086325279	0	0	0	0	0	0
ENSG00000092330	25.5953957144078	24.341683213619	20.3663626045431	38.4602165955551	26.3110510882936	90.8112835603892	0	0	2.60004916936911	0	1.76609215489676	0
ENSG00000092345	44.263319386114	32.066151732204	27.0246434370597	77.404557814159	82.9278857616805	17.7532527936784	0	0	0	0	0	0
ENSG00000092421	164.631077281026	116.716924813923	112.384057924617	78.8855502545282	58.8051672904872	80.8399724539548	0	0	0	0	0	0
ENSG00000092439	20.300712363421	27.014083052803	24.0320983042774	35.4771968141501	30.3307413497277	46.5786359933865	0	0	0	0	0	0
ENSG00000092470	12.9828903380102	13.4083154893961	13.3056665709825	0.724800073242526	-0.232591395178118	0	0	0	0	6.72329214260166	8.64390657816036	0
ENSG00000092529	0	0	0	0	0	0	0	0	0	0	0	0
ENSG00000092531	13.6325760849238	12.1983540530148	10.8171665697779	12.7180846254369	0	22.6159956030773	0	0	0	0	0	0
ENSG00000092607	0	0	6.07323271821624	0	0	0	224.322366544941	99.3182282480535	173.323020739678	154.657907468819	66.2495510064554	154.109454848901
ENSG00000092621	5.04830796804482	2.60726746191081	1.49955380032482	0	4.91758077435496	0	0	0	0	0	0	0
ENSG00000092758	10.9700641935135	14.6206101301894	13.7361787938642	11.3987991168888	13.5050462927659	31.1648716809084	42.2926964887653	16.6980217359771	32.5823416806546	11.5431091044517	15.6007143482045	0
ENSG00000092847	0	0	0	0	0	0	0	0	0	0	0	0
ENSG00000092850	5.12779783197989	9.97344300134661	7.69255568361851	15.1261111707503	0	0	0	0	0	6.74996258376915	4.6972951155142	0
ENSG00000092853	24.6679536505402	22.7891235005184	20.3394242971501	15.5312185654386	14.946916502731	32.7802999382711	0	0	0	0	0	0
ENSG00000092871	15.2119378171736	21.2297360697591	17.4335370087985	23.028596432352	14.772298512801	0	0	0	0	4.11703481331862	4.06127920535843	0
ENSG00000092929	15.7053547364075	17.089709183625	16.2481196127419	0	0	0	0	0	0	0	0	0
ENSG00000092931	117.313055699637	105.687537478215	92.1722811701785	102.443658581674	67.8641398327285	110.133392385765	0	0	0	0	0	0
ENSG00000092964	0	0	5.5096748833147	0	0	0	159.516772843616	79.7074868254663	154.125096344385	76.8462735484692	74.503962286489	100.189483788854
ENSG00000092969	0	0	0	0	0	0	78.6068280874352	31.2608647576501	76.037192036377	34.4918904113766	37.4387387195306	0
ENSG00000092978	18.9483728581464	15.7998673066138	15.0783706734964	93.9239672011285	33.4992352692564	0	0	0	0	0	0	0
ENSG00000093000	45.9588217722248	40.6591089139689	34.8389458860674	19.4223714081842	23.6662539371914	0	0	0	0	0	0	0
ENSG00000093009	66.5868993328667	45.9679679854915	42.9494806780278	157.159800646427	72.5715187415522	0	0	0	0	0	0	0
ENSG00000093010	52.1659539750885	51.1014032195653	41.7044612571743	23.3417418887644	28.2773448055669	0	0	0	0	0	0	0
ENSG00000093072	35.7616849665764	26.5950863850484	26.5033963776951	52.7204060185324	75.2149636706827	224.11116393017	0	0	0	0	0	0
ENSG00000093134	0	0	0	0	0	0	0	0	0	0	0	0
ENSG00000093144	60.9512638310849	23.9085225702678	42.7965805170338	32.6127208379998	24.3227065619125	55.7665546719227	0	0	0	4.1048370279909	7.56479455931546	0
ENSG00000093167	0	0	0	0	0	0	0	0	0	0	0	0
ENSG00000093183	48.2937905671012	42.0995568549084	34.5766989029337	63.5160386209106	45.8022385611302	68.689980730824	0	0	0	0	0	0
ENSG00000093217	0	3.4167729467831	4.04553777233383	0	0	0	0	5.79562123128094	15.007161551896	6.80633548672027	10.2211107553208	0
ENSG00000094661	0	0	0	0	0	0	0	0	3.75151840635373	6.80316661787735	4.14115224306785	0
ENSG00000094796	0	0	0	0	0	0	0	0	0	0	0	0
ENSG00000094804	21.6605783373574	17.9345038613066	16.2908420354352	35.8493651300862	13.7673366471016	31.6695225465482	0	0	0	0	0	0
ENSG00000094841	5.00681508144884	9.98221139361117	8.94759955312462	16.0254947679852	9.12439435999931	0	0	0	0	0	0	0
ENSG00000094880	33.1672981882259	32.9479563863704	32.1489305205169	54.1979323233464	28.6163635983733	0	0	0	0	0	0	0
ENSG00000094914	0	3.56420028723966	4.44245090728969	0	0	0	98.2682373026437	39.889516963785	101.192862386003	40.4321983064	53.4368423791581	58.7162136165172
ENSG00000094916	136.16137521741	104.211512992232	99.0656326592064	248.122235491561	134.804095068651	187.375947253336	0	0	0	0	0	0
ENSG00000094963	0	0	0	0	0	0	0	0	0	0	0	0
ENSG00000094975	37.1405718066875	40.2175671058986	34.8932781196919	61.9528989227036	48.5555605427742	89.0185894012116	0	0	0	0	1.60485480286622	0
ENSG00000095015	10.9359903900152	14.3376509488888	17.8278466135292	0	0	17.5009273608585	0	2.068499065877	15.7875531053202	15.2256651100114	19.0083401592729	0
ENSG00000095059	26.8072120932026	19.9484954446444	17.5774012320293	36.4976844183763	27.3983535678357	68.4548376083516	0	0	0.513122814390027	0	0	0
ENSG00000095066	18.1137061861196	23.6322024989791	22.4886838696966	16.2022516829621	16.3503210354715	64.4818430191189	0	0	0	0	0	0
ENSG00000095110	0	0	0	0	0	0	0	0	0	0	0	0
ENSG00000095139	35.5824520515304	27.2709207902425	23.7048195933147	22.1098504611293	17.6387716547564	37.9983124604031	0	0	0	0	0	0
ENSG00000095209	0	1.51196697953741	3.11992354657222	0	0	0	0	10.0231117291981	30.0707147798787	67.081275429668	55.7611829859686	0
ENSG00000095261	35.2925875753024	29.826576869175	29.1156616444806	37.5023329095061	28.2331452539231	42.3549357846926	0	0	0	0	0	0
ENSG00000095303	0	0	0	0	0	0	-1.88350108548237	16.5315583524773	56.0679660876415	30.2806411653095	34.6527332923938	87.7215271050146
ENSG00000095319	23.4278659834199	35.8323580292028	30.6980436819476	23.5855880780539	29.4114291736428	22.9372069748649	0	0	0	0	0	0
ENSG00000095321	41.0532017928775	55.779565511843	42.232247899719	40.969975400167	42.2178459648352	58.6271520560737	0	5.75589658511127	19.6949237943634	11.7742035719706	8.6197890192766	0
ENSG00000095370	8.69458284301446	11.3556902973545	15.6960849520618	0	2.753321981644	0	0	0	0	0	0	0
ENSG00000095397	0	3.23774269448321	1.70955988535242	10.422234708719	0	0	52.4668649413348	26.5539203305415	60.643339081746	20.3747721086697	12.150335217301	0
ENSG00000095464	0	0	0	0	0	0	0	0	0	0	1.22920013980815	0
ENSG00000095564	20.3596329608196	23.1560393758699	21.4605764915385	53.4775986414889	20.1267876314217	19.7553982189263	0	0	0	0	0	0
ENSG00000095574	15.2030993412245	11.4754109818195	9.40488527848177	0	0	0	0	3.37385436368871	10.501424160267	23.5923847571743	24.4083955903862	0
ENSG00000095585	0	0	0	0	0	0	0	0	0	0	0	0
ENSG00000095587	0	4.57088373438094	6.55081441440905	0	0	0	60.0629055464921	21.5361146657156	46.7755569182221	39.2373749234067	40.6065359292843	0
ENSG00000095596	0	1.8957799738176	8.96547310058989	0	0	0	238.796127752365	109.886156237116	183.691205212852	139.817848503635	156.732361100891	351.644986678158
ENSG00000095627	0	0	0	0	0	0	0	0	0	0	3.19192671161571	0
ENSG00000095637	4.1072789506031	7.85290156385017	9.60610962405616	0	6.83983214134791	0	0	0	0	3.09899937770256	8.38609753752062	0
ENSG00000095787	56.9520322187023	46.4932065188251	39.5942194899947	59.8482031533644	44.1842968834719	7.82481585399346	0	0	0	0	0	0
ENSG00000095794	18.9316193798867	20.0971226210264	18.7771204199605	45.1126632559466	24.583543438485	31.6695225465482	0	0	0	0	0	0
ENSG00000095906	14.9687289589174	24.534299039544	23.6007788809335	0	15.9953511811924	0	0	0	0	0	0	0
ENSG00000095932	0	4.46127500589358	3.84347345995253	0	3.97710138891707	0	0	0	3.86172670851366	0	1.29129028340082	0
ENSG00000095951	17.5047394929112	21.6347416350002	25.1794774854478	24.1990310001635	15.1881971895673	59.7050133731748	0	0	0	0	2.0246072272137	0
ENSG00000095970	0	0	1.91382501284215	0	0	0	0	0	0	0	0	0
ENSG00000095981	0	0	0	0	0	0	0	0	0	0	1.13267736371898	0
ENSG00000096006	0	0	0	0	0	0	0	0	0	0	0	0
ENSG00000096060	22.6206282209739	35.503645294322	41.0619344080439	0	16.2598217521731	0	0	0	0	11.6517221447352	7.51695453196443	0
ENSG00000096063	12.0035207648734	21.0828143749125	20.9089049661152	16.3166288262297	4.52414524285129	0	0	0	0	0	3.6215585215836	0
ENSG00000096070	22.8800237105112	29.5684929987805	25.7512773736291	35.7390002344138	23.5351087600235	33.4028845016653	0	0	0	0	0	0
ENSG00000096080	9.66798512301825	11.1714556361485	13.5085766407529	21.165167268817	0	0	0	0	0	0	0	0
ENSG00000096088	0	0	0	0	0	0	0	0	0	0	0	0
ENSG00000096092	5.66988720459313	7.18903540468446	5.07233954921602	0	4.52414524285129	15.1614388796582	0	0	0	6.76991446514262	3.82540235829183	0
ENSG00000096093	16.950174169402	23.328613105153	20.405003206449	73.7469907538425	34.3737786966695	19.7553982189263	0	0	0	0	0	0
ENSG00000096264	0	0	0	0	0	0	0	0	0	0	0	0
ENSG00000096384	55.8700157534993	76.0943521427837	64.5685652889928	74.9251061450291	61.7983164812043	67.9330044323644	0	0	1.83167588231289	1.59050801256163	0.763583565233716	0
ENSG00000096395	0	1.96749989012112	1.38949780154611	0	0	0	0	0	0	0	0.507738458739757	0
ENSG00000096401	21.2417413808627	18.9194188916625	18.4357286326373	50.0510297797469	34.24190678062	86.7805765804548	0	0	1.80451397168929	0	0	0
ENSG00000096433	12.7926347840195	27.0545029132831	23.2565811458635	0	0	0	0	2.02042184778312	11.6800276771261	22.0787099569909	26.2350217208879	0
ENSG00000096654	23.1617649233549	23.0076966183931	23.9585742750203	55.9708096897106	39.1333259913365	99.3483405666088	0	0	0	0	0	0
ENSG00000096717	34.6542548604943	39.4573065972289	34.8169392632491	7.80025491609604	12.2812668854928	21.9934110396831	0	0	0	0	0	0
ENSG00000096746	116.741637580075	88.5616742745857	72.9017726934616	140.812819123252	87.6469319230795	145.627137994726	0	0	0	0	0	0
ENSG00000096872	42.6336972190848	42.8333886056116	38.17429722239	69.1602557315188	45.9116473319171	41.3620920907241	0	0	0	0	0	0
ENSG00000096968	4.86532853203804	8.90810914337899	9.82948465147957	0	8.62693070139516	0	10.5064178337217	18.7945554286568	47.7685296550301	13.2348695545625	14.1797497968183	0
ENSG00000096996	0	0	0	0	0	0	0	0	0	0	0	0
ENSG00000097007	20.6785158947343	26.2017417517302	19.5816933975906	18.7062524141466	12.2595304791117	15.7840234430523	0	0	0	0	0	0
ENSG00000097021	18.9478060111677	17.5046229851593	15.3307853971727	13.4650088411637	12.4993576881848	13.6639443200499	0	0	0	0	3.6474544123832	0
ENSG00000097033	20.0904436147056	25.908675085567	20.3413025572104	35.9905352474478	16.9140941602493	0	0	0	4.30099925748785	0	1.76085861222342	0
ENSG00000097046	37.963212662881	34.9310850743071	27.8124205735411	62.4318682141457	46.7574046422926	65.0188023898426	0	0	0	0	2.74635370692666	0
ENSG00000097096	44.52328172263	36.0415814518963	24.6647928939505	28.3519872631728	23.403236843974	59.8394051082402	0	0	4.70798964564683	9.65444545169362	7.33879709786926	0
ENSG00000099203	37.5351866933859	33.2689254435351	28.3339566480552	60.7700938584222	46.5265805744422	78.4737635471008	0	0	0	3.27606250210167	2.70412044437145	0
ENSG00000099204	0	0	0	0	0	0	0	0	0	0	0	0
ENSG00000099219	4.88077318544697	8.84714735553834	9.75830060841115	0	6.11962377524698	0	0	0	8.24911281246642	6.90790823432927	5.57003497714952	0
ENSG00000099246	12.1158671109236	9.8970215785471	12.3005455344191	0	15.7286901868968	38.2961442707332	0	0	0	0	1.10552055631063	0
ENSG00000099250	0	0	2.24230438877663	0	0	0	137.472480841508	44.3959084320463	86.5265317789808	48.1226192177867	54.0264297527313	68.467720430359
ENSG00000099256	70.0213828174977	74.0584401081856	75.9547257992052	89.9532546843997	61.9287349194906	109.514505881287	0	0	0	0	0	0
ENSG00000099260	0	0	0	0	0	0	0	0	0	0	1.59892717149398	0
ENSG00000099282	1.69720292704705	2.5847223215952	3.03750895079265	0	0	0	0	4.84703276893941	19.1185001682031	20.3003299461405	16.719984317069	67.3940278693809
ENSG00000099284	14.9421816240808	19.9509776497099	15.4502098115656	0	0	0	54.0318794347463	29.7760483530786	74.339545911919	112.083284035137	96.0434370574209	156.637820050824
ENSG00000099308	0	1.53684229044362	2.5467092421739	0	0	0	0	6.46206618584373	18.0380205358408	11.7525923373556	14.2876894164388	0
ENSG00000099326	7.43353719770057	7.50775410528401	8.16696379669263	37.0095312906679	14.5100081584652	35.2706381918478	0	0	0	0	0	0
ENSG00000099330	14.0256556697716	10.9605399667718	8.80693864977237	0	0	0	0	0	0	0	0	0
ENSG00000099331	0	0	0.569944512808286	0	0	0	0	0	0	0	0	0
ENSG00000099337	0	0	0.917434924155626	0	0	0	144.210256284247	48.5995862122275	114.663603943909	56.2259077023173	44.8231904794403	0
ENSG00000099364	31.9004491091233	33.5750118176206	30.4592679403298	58.0437968493531	58.4762142392451	86.3417578640589	0	0	0	0	0	0
ENSG00000099377	5.54232019318095	6.19982376961761	4.74032262739022	0	3.51393888450555	0	0	0	0	0	0	0
ENSG00000099381	40.0591862810504	34.8440255711151	27.1925831274893	62.0030667101211	38.4710067147462	44.5650626323712	0	0	0	0	0	0
ENSG00000099399	0	0	0	0	0	0	0	24.4441426291794	0	0	0	0
ENSG00000099622	37.9604541932762	40.9832686312801	41.6401457023643	39.0820054150265	34.4281029285518	41.8089345108596	26.6100601470102	10.3051357979572	27.6526898167439	6.86213850864123	7.76495165807246	0
ENSG00000099624	15.700333611734	22.2738276618878	20.4322097693604	0	5.4249548900173	0	0	0	4.40809990478802	2.96028900732243	1.37634671198434	0
ENSG00000099769	6.35038703854005	1.83068568013696	0	0	0	0	0	0	0	0	0	0
ENSG00000099795	10.9694973465347	14.1510861170922	11.8629075954099	15.2488783307154	11.5161322288665	16.6589334392664	0	0	0	0	0	0
ENSG00000099797	11.3981281596061	12.359266850375	12.585993664947	20.4695850892389	14.8375077319441	0	0	0	0	0	0	0
ENSG00000099800	48.3365245332187	60.0216230607619	48.2758678781846	70.8440287326279	50.6966294513409	82.3868411254958	0	0	0	0	0	0
ENSG00000099810	40.466830053785	46.2133542316452	36.6522729554036	58.3543547219109	58.2573966976714	0	0	0	0	10.2496429976704	3.66149504043831	0
ENSG00000099840	10.943451004761	11.8021547108001	11.9213713054355	0	0	0	0	0	0	0	0	0
ENSG00000099849	14.272698265492	14.1417581133477	13.397123692016	0	0	0	1.93530187532699	0.974771760150148	14.6395210641194	6.92338293520629	6.21759960345559	3.17957490674729
ENSG00000099860	6.99936244015063	2.94265966969086	5.49984573078908	0	0	0	2.85956517581252	12.0395517196778	20.455673953405	16.0674334209688	26.0201290998875	0
ENSG00000099869	0	0	0	0	0	0	286.293863592551	105.523665438647	188.266876085258	143.071633857163	129.914175425905	197.841073818753
ENSG00000099889	0	4.05626944065249	2.89888386132831	0	0	0	128.449822275554	46.7004415375763	107.447546988013	76.5001981228031	61.6807672471901	111.101363664549
ENSG00000099899	82.8300014019838	85.4211407083206	66.1794182387282	81.304339533454	48.911880955899	0	0	0	0	0	0	0
ENSG00000099904	4.65375095847175	14.5770732966186	14.8446927810484	9.83565941868178	0	0	0	0	-0.0797059366077582	0	0.235876847066607	0
ENSG00000099910	14.4141636354082	25.0123770904433	24.1402760429959	10.9650203575743	12.4783480206854	48.446389683569	0	12.4532740586765	31.8632084559217	14.6315812984508	15.928319495725	0
ENSG00000099917	14.7249532536823	25.0123770904433	24.1210753679243	10.9650203575743	12.4783480206854	48.446389683569	0	12.4532740586765	31.3137276047876	14.6315812984508	15.928319495725	0
ENSG00000099937	0	0	0	0	0	0	0	0	0	0	0	0
ENSG00000099940	21.5622467502371	26.5055025521578	29.7737302900194	10.8949445734747	19.9921382280152	46.3171130504174	0	0	0	3.13231909612326	2.80676686261683	0
ENSG00000099942	48.4953991531973	43.840848776283	38.3836263881162	34.368372689717	32.843509383417	0	0	0	0	0	0	0
ENSG00000099949	1.65503580790822	6.89363856793072	3.08574256039303	0	0	0	12.3056029895612	8.78133668525402	18.0177586706719	30.2041665433446	29.1867008548157	51.0814667212425
ENSG00000099957	0	0	0	0	0	0	0	0	10.1299922658349	3.51131008363832	3.54761311524643	0
ENSG00000099960	0	0	0	0	0	0	34.3333624107826	11.4668582366501	33.4252641628592	27.6610136662203	23.0711762653824	0
ENSG00000099968	21.6027914339162	20.9452234413981	20.6747403451366	40.0921494743084	30.1778597661788	25.6960023454263	0	0	0	0	0	0
ENSG00000099985	0	0	0	0	0	0	0	0	0	0	0	0
ENSG00000099992	4.56132340455355	5.03807757688755	7.25609134040435	0	0	0	0	0	0	0	0	0
ENSG00000099995	26.6678528802209	36.0306972435036	29.221984007826	53.2260636284549	25.8080495846397	0	0	0	0	0	0	0
ENSG00000099999	31.9079755777851	37.5278963969973	38.3583499737079	62.4790933470856	38.3726164919677	104.802612844264	0	0	0	0	0	0
ENSG00000100003	0	4.11311953110502	6.0436431928166	0	0	0	0	0	11.2014589487735	12.8920171354007	18.6383927799547	0
ENSG00000100012	0	0	0	0	0	0	0	0	3.73898461235676	0	2.06759148990674	0
ENSG00000100023	90.0361523565449	64.7246606639458	53.587033371499	30.3771233585288	34.5049238738374	57.24759119422	0	0	0	0	0	0
ENSG00000100024	0	0	0	0	0	29.0777086325279	0	0	0	0	0	0
ENSG00000100028	59.1708603597177	57.4143555988511	45.0547929046046	76.3162705041853	56.8807357068494	55.3798375040375	0	0	0	0	0	0
ENSG00000100029	98.9641502012388	69.8101586920552	72.510732880321	50.8954629000617	55.7888282156258	116.379394115933	0	0	0	0	0	0
ENSG00000100030	18.7640845972888	24.4332443488587	22.4482516481128	11.2576289995272	19.8420341318233	18.3922953943835	0	0	0	2.81248465562574	1.75493098085117	0
ENSG00000100031	8.41730018125988	4.09358240701181	3.8331773566519	0	0	0	0	0	0	0	0	0
ENSG00000100038	13.7325301075038	13.0480083204469	9.94515930747587	10.3002433996854	11.8218953959644	0	0	0	0	1.62930219075215	1.27329790109755	0
ENSG00000100053	0	0	0	0	0	0	0	0	0	0	0	0
ENSG00000100055	0	0.167827488473685	0.529419745189742	0	0	0	0	0	0	0	-0.0878944108598955	0
ENSG00000100056	6.92567705073403	7.02259559199064	6.86011382424592	0	0	0	0	0	-0.102931307071062	5.84091880425013	4.75256024308325	-4.73177600059099
ENSG00000100058	77.7483893082339	13.2213587732602	9.58222474117759	9.4634911027457	0	0	0	0	0	0	0	0
ENSG00000100075	38.8569403960012	52.2094296259185	52.4127398536507	0	23.0140123337724	0	0	0	0	0	0	0
ENSG00000100078	38.2368839742268	51.0848706300304	52.1323489978713	44.4889293251096	52.9994270247013	85.5042423767071	0	0	0	0	0	0
ENSG00000100079	2.31012200097609	0	3.22997954535092	0	0	0	0	0	0	0	0.65760514853817	0
ENSG00000100083	52.5793497247136	50.8810363686098	45.8669210866046	87.1958804520763	71.9031273544561	131.412860193895	0	0	0	0	-0.0904291297517495	0
ENSG00000100092	41.407292224248	34.2038951810176	29.9918892707464	0	20.060851673397	56.7758564032021	0	0	0	0	0	0
ENSG00000100097	7.7924289433178	12.9520568358833	15.179457829346	5.4573078533084	0	0	0	0	0	3.11532173547939	5.85237768953338	0
ENSG00000100100	0	0.543966730925254	5.2562407867097	0	0	0	22.0215242063345	14.6431100526749	37.2233171241965	19.1363842943867	22.3928623332791	0
ENSG00000100101	29.0172353972896	33.8736855734333	30.8681448080855	23.5329759950132	23.0907245437922	54.8110450789663	0	0	0	0	0	0
ENSG00000100105	129.810421331891	107.480316442718	86.961070287264	60.2306398765302	60.027493219997	140.325576468932	0	0	0	0	0	0
ENSG00000100109	22.3586969500355	25.7235905698583	24.8726416322224	53.6130674933386	18.7181061353508	0	0	0	0	0	0	0
ENSG00000100116	7.70329339079338	14.2770161186837	10.4340807560343	0	3.12502110676662	18.7460964876468	0	5.00164976628493	21.606305613284	33.8318591615545	46.1322636569578	78.6563907434787
ENSG00000100122	28.7677061324815	55.1592261072782	56.143111029287	0	0	0	0	0	0	2.48163372990261	2.158876388206	0
ENSG00000100129	34.3515585578607	29.1028526033343	29.0763326066511	54.8790314078748	25.3269416887302	34.9003790612735	0	0	0	0	0	0
ENSG00000100138	10.3392579473672	12.9477303532919	11.1440418898367	14.1708594279715	12.8051208552827	0	0	0	0	0	-0.055953024033895	0
ENSG00000100139	0	6.6355546975363	6.74516326902761	0	4.93859044185437	0	0	0	0	0	0	0
ENSG00000100142	0.409945179202334	3.47056597362215	2.43819317174155	0	1.90460719206516	0	0	0	0	9.17804652825551	8.27603954270491	0
ENSG00000100146	0	2.9990586481686	3.0955748198504	0	0	0	0	0.834454094838811	2.35065436789483	0.247720543886296	0.847617845377828	0
ENSG00000100147	14.7925340137002	27.9974446360984	24.6329540116749	28.7934468458623	24.8907600833461	47.3026962172241	0	0	0	0	0	0
ENSG00000100150	68.8883928107301	60.3110847701352	58.472063119268	54.7909500793683	73.2353384062319	112.280437675885	0	0	0	0	0	0
ENSG00000100151	2.40166187735793	1.9702442519697	2.05503215581099	19.599433938743	7.34988175360136	14.7894992915494	0	0	3.83934587912403	0	1.41644349616033	0
ENSG00000100154	0	0	0	0	0	0	0	0	0	0	0	0
ENSG00000100156	3.18357025839992	10.2106391931687	6.17709701627961	0	0	0	0	0	7.34518559915749	4.10096560415932	11.6956484403898	0
ENSG00000100162	23.2440748407089	32.5780067188537	28.6404992774115	30.7658912032162	21.6712308321757	45.2594165349332	0	0	0	0	1.24188224905657	0
ENSG00000100167	0	10.4213026123413	9.06661246199379	0	0	0	34.1623262975799	8.51582785784042	34.6972186936547	44.1369224137828	32.4762834982576	81.6781028639907
ENSG00000100170	0	0	0	0	0	0	0	0	8.41542473113658	0	3.66960803712117	0
ENSG00000100191	0	0	0	0	0	0	0	0	0	0	1.75948494619166	0
ENSG00000100196	0	2.97418333726239	3.29929209008309	0	0	0	0	12.4443342194756	33.5523938752595	18.1428913820891	18.1089305322959	0
ENSG00000100201	84.3996992053738	63.423133858558	56.7036899708742	106.588423927845	70.2741561814837	90.1048477387215	0	0	0	0	0	0
ENSG00000100206	20.9510581939576	19.824007031384	21.7546985765152	65.2127990077466	41.6382202915184	63.3863819951432	0	0	0	0	-0.0745543291590872	0
ENSG00000100207	1.62152885138865	2.47045325192665	2.69048238328855	0	8.39183786098152	0	0	0	0	0	0	0
ENSG00000100209	21.752682368997	26.6698143628223	25.3053696412083	35.1851006170862	28.9101105517146	84.837408528409	0	0	0	0	0	0
ENSG00000100211	19.578612257314	28.3052791283052	24.607190868736	104.568161278915	38.5472344818976	0	0	0	0	0	0	0
ENSG00000100216	18.4970741799331	18.9920731497293	16.0747025032271	20.9628809656673	9.27174468930886	25.4420443116921	0	0	0	0	0	0
ENSG00000100218	0	1.80736381629114	1.5477874099252	0	3.36557505472135	0	0	0	9.29731028401353	5.81117070791602	6.38561981216897	0
ENSG00000100219	60.9106415616896	45.8907179145756	41.386903551861	53.3862064155131	33.9424172497438	0	0	0	0	0	0	0
ENSG00000100220	16.7739792241849	12.2131218790585	15.2507129052967	26.3550688056513	6.53479571313169	0	0	0	0	0	0	0
ENSG00000100221	20.2423586130011	27.8108798043018	23.9506113961843	16.9629014070137	11.8252573006464	31.8718535862797	0	0	0	0	1.92039521512885	0
ENSG00000100225	13.9092918996996	23.6589927376755	20.0514141710776	11.2576289995272	7.99840232947786	0	0	0	0	2.39407505702612	4.48498338395408	0
ENSG00000100226	28.2430822120232	29.2821206437707	28.8736672576288	61.4767895327444	38.4266544256073	0	0	0	0	0	0	0
ENSG00000100227	48.5034924688379	41.2623402429294	32.4538189285499	97.9049481250871	44.1190876643288	68.4211972606932	0	0	0	0	0	0
ENSG00000100228	0	1.80736381629114	1.5477874099252	0	3.36557505472135	0	0	0	9.15994007123	6.6258218032921	6.60745603118047	0
ENSG00000100234	4.15810623236121	3.99485788691716	4.7875992147335	0	0	0	39.2695067264449	14.8713542644325	34.7769246302625	27.1483896348722	29.4425459613097	44.0334074970625
ENSG00000100242	0	4.31279986398652	3.2196834420503	14.7842943497118	7.38760273416377	0	0	0	0.230657104703086	3.35226194704465	1.08526108138198	0
ENSG00000100243	18.8807920981285	18.2190164896676	14.5491696147347	14.7252714901881	14.2252546588668	19.8568738793698	0	0	0	0	0	0
ENSG00000100246	0	4.31279986398652	3.2196834420503	14.7842943497118	7.38760273416377	0	0	0	0.288321380878858	3.84770303481724	1.15920648771914	0
ENSG00000100249	0	5.23630334060704	6.84960737231276	0	0	0	0	0	0	0	0	0
ENSG00000100253	0	0.321460372194	1.33691799907531	0	0	0	0	0	1.90845836317199	0	1.71455528764992	0
ENSG00000100258	10.3057509908476	10.6506275541785	7.17694653621481	11.6811393516119	5.04799921264121	28.6909914646427	0	0	0	0	0	0
ENSG00000100263	189.45936739192	146.280398734505	120.989479514922	195.959307314681	112.658969033934	137.65690943856	0	0	0	0	0	0
ENSG00000100266	10.4241590326236	16.8314260646613	13.872461779425	0	0	0	0	0	3.97193501067359	7.65605502423588	3.05807652699649	0
ENSG00000100271	0	6.53683017744166	5.8591033833044	11.5502376414801	10.5111703631671	0	0	0	0	0	0	0
ENSG00000100276	0	0	0	0	0	0	249.486959031717	92.1949368265881	199.993135700012	101.354627542895	102.294864218883	131.793097075327
ENSG00000100281	44.4071222313209	41.4966001905095	33.6320999011345	42.4444937858481	37.2608016420368	10.5621669571116	0	0	0	0	0	0
ENSG00000100285	0	2.1517345513271	0.917434924155626	0	0	26.8232377744602	208.949551485115	77.8059665459493	140.238284977341	109.595551412571	104.577215919429	124.242688520359
ENSG00000100290	0	0	0	0	0	0	137.80005013734	46.2059059914841	101.308190938355	70.1642055982113	62.7719559599443	71.7080143005099
ENSG00000100292	13.4326680397639	36.6735717094141	42.3914880804719	10.5209731910302	23.1416732285199	30.5587451548252	0	0	0	4.03446129868985	2.58434695573919	0
ENSG00000100294	6.83737160203132	9.04226622513703	9.3916095219923	9.21195608971173	4.91685403547332	0	0	0	0	0	-0.055953024033895	0
ENSG00000100296	17.7975201957226	19.4149136016935	14.3831530752072	26.2557391166885	22.2228679650178	42.3365770365466	0	0	0	0	0	0
ENSG00000100297	71.1754702866637	47.1483249082482	46.5998909736505	114.820898530674	71.9102040541599	0	0	0	0	0	0	0
ENSG00000100298	16.5977842789678	17.0179908964579	18.2638731293675	0	16.127223097242	0	0	0	0	0	0	0
ENSG00000100299	2.28470836009704	2.72853712232107	1.75618888796496	0	4.37053692042073	0	0	0	8.92750317126388	5.60890010209218	5.45615305195765	0
ENSG00000100302	3.04088226970237	11.6355425845343	11.4784302501366	0	0	0	0	0	9.35831501511788	34.2441698674903	35.2282800379119	28.9056307072862
ENSG00000100307	2.70524585752792	1.45288559639267	3.32317697296166	0	0	0	36.537628933523	14.0535700817005	37.0578944263353	50.2307364199441	48.6902957455243	0
ENSG00000100312	0	0	0	0	0	0	0	3.90871460164357	11.4546403350016	12.4392367287399	11.7523609447334	54.4830057103757
ENSG00000100316	80.6611910023803	62.4523460086564	56.63223097369	99.931775637661	51.9086502374748	134.001205145654	0	0	0	0	0	0
ENSG00000100320	30.4637753655711	31.7070131711243	25.6356094793569	10.441413517047	20.060851673397	0	0	0	0	0	0	0
ENSG00000100325	0	5.86285653341344	5.41936611672011	9.73556293023911	8.71933743446042	0	0	0	0	0	0	0
ENSG00000100330	0	0	0	0	5.48490755690696	0	0	0	0	0	0	0
ENSG00000100335	0	0	0	0	0	0	0	5.63647482838398	27.155679518489	15.7885554893237	8.29861753056112	23.0290219778452
ENSG00000100341	0	10.1608885713563	7.98947351324204	0	6.57826852589377	0	0	3.67266012535396	9.5364280938368	20.1080296568121	15.892544219305	0
ENSG00000100344	38.7540073424357	47.3319765778645	48.2374665280416	41.9376294072386	29.544597025602	24.5852249537033	0	0	0	0	0	0
ENSG00000100345	54.2311665768721	41.8640181248296	38.3569355574909	11.5297008270206	21.2194218615269	36.1455481880618	0	0	0	0	0	0
ENSG00000100346	0	0	0	0	0	0	0	0	0	0	0	0
ENSG00000100347	17.9749705781426	23.5027402814965	20.934668109054	20.3284149718774	0	0	0	0	0	0	0.681525162213685	0
ENSG00000100350	5.25295914398666	10.6099509184923	6.69525121903573	0	0	0	0	5.72912796346546	6.29288504543237	6.55338023874968	8.96967804174323	0
ENSG00000100351	0	0	0	0	0	0	0	0	0	0	1.43918109607516	0
ENSG00000100353	34.6796685013734	28.5625862751695	32.5207893693785	42.3406029448638	29.1728979004794	92.6361630838222	0	0	0	0	0	0
ENSG00000100359	10.4484389795451	16.3385801877183	13.1306388786597	9.4634911027457	7.97666592309681	14.2865288834441	0	0	0	0	0	0
ENSG00000100360	0	1.2911960755023	3.81444052542365	0	5.96601545281642	0	0	2.16151121754331	7.15349156512676	6.73167715416016	6.43741159376816	0
ENSG00000100362	0	0	0	0	0	0	18.8271325627333	8.96349595213368	25.1305073698632	16.1112488018966	19.0721966918032	67.3441864787753
ENSG00000100365	0	0	1.55012951382873	0	0	0	0	0	0	0.462188935037857	1.53111888471559	0
ENSG00000100368	2.21769444705789	0	0	0	0	0	0	3.49436589492724	13.1928798130079	30.9523133332512	23.4310239114478	0
ENSG00000100372	15.2957052084725	20.5301103912945	18.2502843497896	27.7565015720373	27.8621728676822	30.9454623227105	0	0	0	0	0	0
ENSG00000100373	0	6.28162068326265	4.3505901185716	0	0	0	0	0	11.5672074239578	11.4176957905363	12.4910611896383	0
ENSG00000100376	20.4520605147378	24.8398033611602	19.6613020456234	7.28691648279839	5.22261720257118	58.8465614142717	0	0	2.24712697559206	1.87702273463845	1.30709730039348	0
ENSG00000100379	5.54017329973076	13.8211766067065	12.6676434720604	0	0	0	0	0	0	2.90582087620187	4.76305197052715	0
ENSG00000100380	58.1882310701159	48.7669874540926	43.4878048196079	80.903005526509	53.2528702977922	36.3814155835707	0	0	0	0	0	0
ENSG00000100387	29.4557324350902	33.7561395847058	31.9817560511594	43.5803287794288	23.4916359472614	34.5136618933882	0	0	3.23588037570036	0	0	0
ENSG00000100393	66.3086608764677	52.1197475986295	47.6656437551731	82.2736330712058	48.5113609911305	73.8900665961754	0	0	0	0	0	0
ENSG00000100395	14.9508417867001	15.8224124469294	14.290192423191	24.7226378406909	17.8973196195676	0	0	0	2.07925439725635	0	0.547674977594462	0
ENSG00000100399	5.38524486920561	4.57250276289292	5.10725556785111	0	0	0	0	0	0.603822771267467	0	0.929731988066166	0
ENSG00000100401	39.1901646241689	38.2889336291972	34.0236129612934	0	16.8916310149866	27.9340151661831	0	0	0	0	0	0
ENSG00000100403	37.1740787632071	38.7071535734216	34.3949882555193	0	16.8698946086056	34.1434027628139	0	0	0	0	0	0
ENSG00000100412	47.5376166574958	46.4349018592105	42.8045345164309	81.7679754612833	53.4282150266038	30.3064197220053	0	0	0	0	0	0
ENSG00000100416	4.67050443673153	0	0	0	0	0	0	0	0	0	0	0
ENSG00000100417	14.9086746675612	14.5242157806854	14.3932221102591	0	0	0	0	0	2.81530903222958	0	0.645749885793682	0
ENSG00000100418	43.692000584345	49.8615112129359	44.0123216705626	69.2706206271912	53.7564413389644	70.9444515888918	0	0	0	0	0	0
ENSG00000100422	16.0426521084799	19.0321345142706	16.1372366348632	0	0	0	0	0	11.7343514983733	0	3.56955725179787	0
ENSG00000100427	0	0.711541251584595	0	0	0	0	0	0	0	11.5282900988227	4.69960792509737	0
ENSG00000100429	0	6.71012722778585	8.54460657959456	0	0	0	0	2.24910685866296	14.9585567405719	0	0	0
ENSG00000100433	0	0	1.24572466043146	0	0	0	185.162819246216	72.3779063858624	137.977577046437	130.04053088777	112.763002398117	194.420630573396
ENSG00000100439	20.8951949493391	27.3703292586463	25.7361337069046	67.8174435830229	32.1007591701043	44.7923473744286	0	0	0	0	0	0
ENSG00000100441	13.416166100137	18.0801527150977	21.8013865735628	0	7.99513150260818	0	0	0	12.6895981887636	9.69337809908232	11.3862701714591	0
ENSG00000100442	32.8960426118016	29.5878853672373	28.4471254571879	59.2367707973792	37.9961422039377	46.0065465321547	0	0	0	0	0	0
ENSG00000100445	47.4847075548358	43.9176221936509	39.668258626773	60.8220263889013	49.1915809881237	103.479311028252	0	0	0	0	0	0
ENSG00000100448	0.0470615168960245	0	0	0	0	0	0	0	0	0	0	0
ENSG00000100450	0	0	0	0	0	0	0	0	0	0	0	0
ENSG00000100453	0	0	0	0	0	0	0	0	0	0	0	0
ENSG00000100462	28.7158796781051	35.2438010268814	33.1904902277972	65.0814792765649	56.047680185638	0	0	0	0	0	0	0
ENSG00000100473	0	0	0	0	0	0	232.242705372816	87.049275073655	184.284849634843	72.7190404224771	77.3515761827657	0
ENSG00000100478	26.4656774471459	21.6464025669231	19.8500390047484	60.2511766909896	32.9963909669659	57.4834585897289	0	0	0	0	0	0
ENSG00000100479	13.1958519562119	16.7435857529593	13.5783530293284	27.9182085038583	16.9575669730114	66.1831844399364	0	0.345716103426072	0	4.23286048068212	2.79807017806783	0
ENSG00000100485	22.2571320886159	31.3158568495634	26.4504488786243	0	8.92432366687988	0	0	0	6.05004767627582	8.79966886056482	9.15086471752786	0
ENSG00000100490	0	0	0	0	0	0	0	0	0	0	0	0
ENSG00000100503	3.85117672947677	16.5237360694374	14.5982362728857	0	13.5869034272612	0	44.3515211252139	22.6560683981239	40.9000410914901	47.0379028197093	53.4317330115201	31.3642759694899
ENSG00000100504	8.71999648389351	16.994669032612	13.1030203603478	0	0	0	0	0	0	4.64517118661787	5.72603878650671	0
ENSG00000100505	0	3.94510726510474	3.13819653395722	0	0	0	97.1814574541687	39.7554349149992	93.4001626683489	47.7097516446429	54.9157505059014	0
ENSG00000100519	23.9166104761945	28.7776288233958	28.7925886340704	61.7624602532857	33.5178310348977	0	0	0	0	0	0	0
ENSG00000100522	18.0841516103206	20.2230526226179	16.3386118011923	27.5845262329866	4.78643559718707	0	0	0	0	0	1.61889543092133	0
ENSG00000100523	4.58617019845386	9.77920486996098	8.68211223203319	0	8.15128391302679	0	0	10.810698372238	24.6809943205058	5.61444212754797	5.16037142660898	0
ENSG00000100528	27.6250685289436	35.3310715650389	30.1000670094648	33.3288398320374	23.4264267281183	14.2865288834441	0	0	0	0	0	0
ENSG00000100532	8.80378145719719	10.7115532660866	10.8330497753804	19.8218712048505	11.767796441693	0	0	0	0	0	0	0
ENSG00000100554	41.038148855554	36.2514681475387	31.1659592825422	112.368416195011	42.4598533905532	33.1670171061564	0	0	0	0	0	0
ENSG00000100557	0	0	0	0	0	0	0	0	0	0	0	0
ENSG00000100558	-0.125934510437764	0	0.423829267790105	0	0	0	58.9680237504086	23.4519292524736	63.2397205870767	0	17.3554358408692	0
ENSG00000100565	0	0	0.818394158354102	0	0	0	0	0	0	0	0.501757095469966	0
ENSG00000100567	28.5071769489867	25.443811413651	25.6754252457169	70.6720533935771	43.4206157046089	37.1383918820303	0	0	0	0	0	0
ENSG00000100568	25.5078949514444	26.0672577123366	21.4680666470923	22.6769649308754	16.5865945867704	16.8948008347753	0	0	0	0	0	0
ENSG00000100575	31.9713490221349	32.1625323048573	33.1453465287163	91.1999219849604	47.3295750916037	28.2650303465106	0	0	0	0	0	0
ENSG00000100577	27.7758498332817	31.6207263064828	29.579770522474	56.2188537308825	36.1873480317573	41.2277003556587	0	0	0	0	0	0
ENSG00000100578	26.1839495514191	29.934654555474	28.1802997138002	64.4085958111356	36.7301440065332	14.7341422608881	0	0	0	0	0	0
ENSG00000100580	8.37456621514229	14.4830191966751	13.2598955525099	0	5.6819886920996	18.6281627898924	0	3.21726195815479	6.45149888623177	2.06932302396685	2.92422634237726	0
ENSG00000100583	8.37456621514229	14.4830191966751	13.2598955525099	0	5.6819886920996	18.6281627898924	0	0.368183570212285	3.10875066330005	1.34832949413112	2.64841297645595	0
ENSG00000100591	33.015885929137	46.4768384160653	39.7744497412991	73.5482761763274	40.5987090183581	0	0	0	0	0	0	0
ENSG00000100592	4.26728726453919	8.29444337192038	6.43653805166653	0	8.78454665360355	0	0	5.78416160657691	21.4791759008837	21.8415165968081	17.6213698211701	0
ENSG00000100593	0	0	1.62927431801828	0	0	0	147.329416059938	58.5770402559217	111.902618732927	71.4853818322715	70.3082502867765	101.081433710463
ENSG00000100596	7.84541453251218	11.6106672736281	15.4820715785285	9.00917552897181	4.28359129489656	0	0	0	0	0	0	0
ENSG00000100600	1.73937004618589	4.24205754891887	6.0216133556473	0	3.25616628393451	0	0	0	4.41120755964778	7.48536596952256	2.26662119383909	0
ENSG00000100601	21.7887802357101	28.7600353153588	29.1695300342618	61.9939725516225	39.7710138891707	0	0	0	0	0	0	0
ENSG00000100603	16.9334206911422	22.6919524274841	23.6078051926441	59.8482031533644	35.9909936354463	36.1290901507509	0	0	0	0	0	0
ENSG00000100604	10.5500935430613	13.5882746486118	12.2670723442853	11.6606025371524	5.09219876428493	33.1670171061564	0	0	6.50404291221593	9.7918823536722	9.36340432508297	5.82484249138502
ENSG00000100612	0	0	0	0	0	0	0	0	0	0	0.0719695292130848	0
ENSG00000100614	0	0	0	0	-0.852080282150451	0	0	0	0	0	0	0
ENSG00000100626	0	4.86695398826134	3.9272171234477	0	0	0	79.778694463196	35.6718682859139	82.1405980372079	109.930728652357	95.0265205180958	140.8607323948
ENSG00000100629	2.78901324882684	8.09777105526129	8.18570062792088	0	11.277031758675	0	0	0	0.60714512730989	0	0	0
ENSG00000100632	41.4321390181483	32.0272853187843	29.5249744450062	87.3634381195974	53.7564413389644	0	0	0	0	0	0	0
ENSG00000100644	66.0654520182114	60.0309538220942	49.5417209013741	89.2987461337405	54.0832141735617	82.2030752784976	0	0	0	0	0	0
ENSG00000100647	2.73875281404749	6.32927365238986	4.82085251322619	0	5.48563429578859	0	14.6284444038539	4.44550937451356	12.648300076468	7.14454472730399	8.46992232947819	0
ENSG00000100650	66.1742665855194	52.2144863410724	44.9257565590108	95.1607494866156	46.0918953598421	68.9730316283634	0	0	0	0	0	0
ENSG00000100652	10.5755071839404	8.26101402321205	11.2452162015318	0	0	0	0	0	0	0	0	0
ENSG00000100665	0	0	0	0	0	0	0	0	0	0	0	0
ENSG00000100678	0	0	1.5932150717788	0	0	0	132.134551612504	48.8208828580001	128.831437066116	69.0358865206875	72.4807483266645	64.7097964669355
ENSG00000100697	25.7430104940602	31.5686455140798	25.6384154271036	27.6564050835946	17.1104485565603	0	0	0	0	0	0	0
ENSG00000100714	62.2340240278508	44.7093742228766	42.5530122845342	49.9411056880073	44.0118879701717	97.9833158949676	0	0	0	0	0	0
ENSG00000100721	0	0	0	0	0	0	0	0	0	1.29569827095122	1.12403832167038	0
ENSG00000100722	21.0482261104071	26.2880286163717	22.4815049466054	18.241668433143	18.0291915356171	0	0	0	0	0	0	0
ENSG00000100739	0	0	0	0	0	0	0	0	0	0	0	0
ENSG00000100744	0	0	0	0	0	0	0	0	0	0	0	0
ENSG00000100749	9.79335278647726	9.97587718662007	9.89738954171873	0	6.42466020346321	0	0	0	0	0	0	0
ENSG00000100764	21.375769206941	17.9243963764441	14.251791073048	21.1754356760468	13.8767454178885	0	0	0	1.41444499377069	3.572272363652	1.82076339050548	0
ENSG00000100784	0	0	0	2.47945166912989	0	0	0	0	0	0	0	0
ENSG00000100796	55.5580924412676	55.9513625175959	45.0505725406408	85.5898370372754	61.0759278984585	44.2226894748751	0	0	0	0	0	0
ENSG00000100804	61.0060272890707	49.9035320669895	46.2743705084574	145.697987033571	78.5126401488108	59.2022053984539	0	0	0	0	0	0
ENSG00000100813	56.8191380865815	46.9129799101099	38.5044652187261	70.9441252210705	56.1163277891047	71.9208372455493	0	0	0	0	0	0
ENSG00000100814	31.1182947116602	42.0731280969418	36.2354699993241	118.859654009789	60.3115199807138	0	0	0	0	0	0	0
ENSG00000100815	38.2318152814886	30.2339126050067	26.8092156473094	51.9555325722008	31.1618119643788	78.7528094055743	0	0	0	0	0	0
ENSG00000100823	73.7880725819723	69.5653244289096	64.6572867371089	141.011475668177	81.0921451623439	145.394260196887	0	0	0	0	0	0
ENSG00000100836	63.9868593728856	63.7423724037306	57.7637328623972	94.0037721315076	68.1409038489968	111.223049945461	0	0	0	0	0	0
ENSG00000100842	62.9159555633098	73.7404981311162	54.8547646547488	36.9273840328301	38.6566432526845	0	0	0	1.57897711717782	2.0310857129844	1.19737661763631	0
ENSG00000100865	6.33363356028027	11.9301626977579	9.58268858502084	11.2370921850677	6.83983214134791	0	0	0	1.25503312055517	2.69111696280645	2.96592925016951	0
ENSG00000100867	4.97320073936516	7.9143131175855	7.92625959253397	0	5.24508034783386	0	0	0	0	0	0	0
ENSG00000100883	33.7224246760631	25.2642410342761	28.303179959332	72.0659496361764	42.4738399480242	158.058810161637	0	0	0	0	0	0
ENSG00000100884	0	0	0	0	0	0	0	0	0	0	0	0
ENSG00000100888	22.7454290374541	38.4374087711043	31.1879659053604	44.5377143792706	26.2449579289054	62.968785962522	0	0	0	0	0	0
ENSG00000100889	44.3501000428571	36.9485360960888	40.9558815332012	30.4408751860105	42.258300972974	44.5995784788478	0	0	0	0	2.95545892053444	0
ENSG00000100890	94.058532701609	74.2756907127046	69.1981848743559	234.058681647636	105.509161204719	134.284342032062	0	0	0	0	0	0
ENSG00000100897	22.6951686026748	26.9915379124873	29.0042141141721	32.9053294799527	32.4950001424387	102.564600023507	0	0	0	0	0	0
ENSG00000100902	4.6791645993508	2.61970511736392	3.50488762037607	0	0	0	0	0	0	0	0	0
ENSG00000100906	73.9298010215308	80.2605274914604	61.7275703343542	55.050082081336	42.303213892182	72.6626037161032	0	0	0	0	0	0
ENSG00000100908	41.3384574747687	54.9446712611693	48.553528823323	39.911104382849	42.8141847199149	192.655004555836	0	0	0	0	0	0
ENSG00000100911	28.5990376559262	40.2214507235496	33.1141549212221	9.3120525781544	27.5339465553216	50.8023362020803	0	0	0	0	0	0
ENSG00000100916	12.4148312527063	18.921749062253	13.0716453219154	14.2298822874953	9.50693523634938	72.4940476970107	0	0	0	0	0	0
ENSG00000100918	0	5.59458369491104	4.14300791340308	7.04527065813605	0	0	0	0	1.42006635136646	0	0	0
ENSG00000100931	22.0103865619986	26.6107366406613	25.2182587567135	26.548905401198	20.7160317751091	77.9269405771588	0	0	0	0	0	0
ENSG00000100934	24.2733966409671	19.6213747407177	19.1812851688359	20.6107552066005	24.9335061572266	41.0933086205933	0	0	0	0	0	0
ENSG00000100938	56.9736123078636	49.6156584208047	47.2640425292611	49.0143047618984	61.1779841754033	129.03020227458	0	0	0	0	0	0
ENSG00000100941	75.8839159417032	66.8792445311396	63.406538778429	98.0095356894998	73.920170683732	109.326475584142	0	0	0	0	0	0
ENSG00000100949	25.0197896360392	19.6829883296939	17.0413664896768	19.5080052572533	18.0022713910841	42.7831799709145	0	0	0	0	0	0
ENSG00000100968	3.23133540829908	4.9863813963572	5.11602509963292	5.30765709324176	1.0234563223091	8.72388147854786	0	0	7.43225045197215	6.09375843166757	9.65252909358302	0
ENSG00000100979	18.0512022095515	28.7859415679558	34.1591475085357	19.2073382354518	16.5340016943487	39.9007469000629	0	0	0	0	0	0
ENSG00000100982	84.6776216172046	81.32754858927	70.9990047166352	79.9045462977483	63.2394599522878	155.824358404542	0	0	0	0	0	0
ENSG00000100983	25.6424896245015	27.2255231955057	25.4309645214377	30.4772198469714	11.3212313103188	43.600104911481	0	0	0	0	2.22252343254969	0
ENSG00000100985	17.5418597406206	16.2792268569876	18.4717241797337	0	6.82392593800772	0	0	0	0	0	0.616069197639776	0
ENSG00000100991	14.3627695066713	16.1426845945894	12.6215890673432	16.7709444000035	14.0730998141995	27.0591051699691	0	0	0	0	0	0
ENSG00000100994	7.13140774204569	16.4994929850784	13.4898398095247	0	10.7951971238839	0	0	1.9440796082236	6.3530917441206	10.9540104511388	12.2990669538316	0
ENSG00000100997	13.8168643457814	19.0531262075258	17.7632182766041	18.8474225315082	15.7337875657383	0	0	0	2.08437464744796	2.82356870653732	2.41232664120281	0
ENSG00000101000	0	1.67210305336738	2.11726807889024	0	0	0	0	0	4.86740151886234	4.49110820827192	3.28781625450431	0
ENSG00000101003	36.6016262674807	24.7504096023979	21.4591620753214	36.5757525313535	31.3574396218081	45.4514005643526	0	0	0	0	0	0
ENSG00000101004	22.5265001261194	27.7860044933956	22.069386198333	23.9269591726701	18.3994371829765	0	0	0	0	0	0.903361381225184	0
ENSG00000101019	21.1660673052043	22.0996053069162	21.0536057949163	31.8786526133574	24.7154153545345	0	0	0	0	0	0.313774007651936	0
ENSG00000101040	229.168766551653	157.955508884142	150.189960302173	268.430781216375	180.25162458308	414.886326456955	0	0	0	0	0	0
ENSG00000101049	0	0	1.81847512098653	0	0	26.200653211066	0	0	0	0	0	0
ENSG00000101052	14.4973641797284	19.3866127341691	20.63399689109	42.3611397593233	27.9491184932063	0	0	0	0	0	0	0
ENSG00000101057	11.7672715283001	18.4739934659413	13.0781849050955	14.9870749104518	8.41284752848093	0	0	0	7.51305817749319	6.0273097006918	6.13965409129541	0
ENSG00000101074	0	0	0	0	0	0	0	0	0	0	0	0
ENSG00000101076	2.11660673052043	0	0	0	0	0	0	0	0	0	0.661556902786333	0
ENSG00000101079	6.19903888722324	8.92255001178717	10.748317868889	8.2443020826402	10.0742620189014	27.5637560356088	0	0	0	0	2.054664360448	0
ENSG00000101082	16.4891700937685	16.9099356150309	13.8598235722208	6.9840394336158	0	0	0	0	0	0	0	0
ENSG00000101084	34.8256996100805	25.7486053614133	27.4048755420408	21.3201307165654	24.8708067978871	0	0	0	0	0	0	0
ENSG00000101096	0	0	0	0	0	0	154.348700559823	53.3830816172612	103.54017629897	78.1732796499934	74.0996437575858	167.731442565889
ENSG00000101104	17.312357916413	17.9632627898638	17.1694117656046	0	9.85689795509095	22.3801282075684	0	0	0	0	0	0
ENSG00000101115	121.378068213308	90.8214641073398	72.480285529575	101.110787195484	86.947733224478	132.081127372431	0	0	0	0	0	0
ENSG00000101132	46.169195926864	36.9590265739941	27.4562958908326	58.7077304269063	39.3083223353502	24.5660678707984	0	0	0	0	0	0
ENSG00000101138	70.5008409123272	47.7882862119784	49.2729114503731	50.009956150828	54.71720365302	79.8306707226754	0	0	0	0	0	0
ENSG00000101144	0	8.85880828746124	8.94811573528745	0	0	0	203.373621990683	79.3357178840932	170.627604368053	92.1780818513569	102.540543941285	125.504337627587
ENSG00000101146	17.1404421890131	17.0329481497774	14.9067072646139	15.8128771768579	11.2533971014137	0	0	0	0.170920187495169	0	1.64623439799773	0
ENSG00000101150	35.1498995866049	35.2813209432265	31.723242703459	40.4052949307207	36.602519969642	37.659500784981	0	0	0	0	0	0
ENSG00000101158	15.3864322214545	19.6540273658958	15.7592988727699	7.15601477266654	9.87718088370873	0	0	0	0	0	1.3450579421241	0
ENSG00000101160	9.00414671524002	9.4672173855517	10.5016654322324	0	0	0	0	0	13.6054772984924	7.69391151659331	10.628388103453	0
ENSG00000101161	26.8943082602173	26.3284484768518	25.0188457731652	0	6.44639660984425	23.7267729948002	0	0	8.85625793977631	1.41981895784831	2.44040789731302	0
ENSG00000101162	0	0	0	0	0	0	0	0	3.44627561523449	0	0	0
ENSG00000101181	24.8528087583766	27.0615035040248	23.5558150629231	46.1701453442311	28.1454728895173	13.5460106222955	0	0	0	0	0	0
ENSG00000101187	14.6071120588851	16.8586315461581	16.1180359597917	0	0	0	48.9626572969583	15.734073380737	42.1067494788451	52.4275260293941	0	0
ENSG00000101188	0	0	1.88356730175488	0	0	0	139.05871658134	50.2440944168924	105.486961598037	60.7674510068994	51.450195793675	62.4933537671572
ENSG00000101189	3.9391773210265	7.0397835392472	5.92419556407275	0	0	0	32.227617348378	15.5550563983787	53.3065426054642	16.8555241679716	21.5562833740325	0
ENSG00000101194	0	6.96981794770975	6.12137325112539	0	3.78074699260606	26.5709123416403	0	0	0	0	0	0
ENSG00000101200	0	2.43391700909754	3.51049951586963	0	0	0	43.7296505112543	19.7234618361199	51.9820440486844	20.6755170755099	26.8323031147709	22.5631581226286
ENSG00000101203	6.64442317855442	5.18577599526442	3.49083499695488	0	0	0	0	0	0.74451534009342	1.7833651690981	2.30634822450726	0
ENSG00000101204	0	0	2.12874722571608	0	0	0	0	0	0	5.99088712769866	3.05764376430782	0
ENSG00000101210	0	5.74341020230097	6.08138668029464	0	0	0	120.639938450617	38.7717985408585	106.678885073908	43.6519234292843	31.6189581803816	28.1540967343168
ENSG00000101213	2.71277232618968	1.79337271377764	4.89250716186189	0	0	0	0	0	0	0	0	0
ENSG00000101216	16.5631436284907	24.7892760158176	16.7207470425621	8.78844573762703	11.3632506453176	0	0	0	0	0	-0.133850184619224	0
ENSG00000101220	8.88753126649136	13.3822715706204	14.5697847060232	7.26637966833894	13.1985563867864	15.1449808423472	0	0	0	0	0.613716875435302	0
ENSG00000101222	0	0	0.615372174661889	0	0	0	2.59069802318771	1.30845469237124	7.37902841963824	9.63837624253432	6.57126177838738	0
ENSG00000101246	27.9046143854429	37.8340005455822	33.0290406324163	0	0	0	0	0	0	0	0	0
ENSG00000101247	29.5314065107486	30.5541847526666	29.6158297687134	56.360023848244	37.9132450024392	56.8773320636457	0	0	0	0	0	0
ENSG00000101251	0	3.91945523066833	4.29633566227151	0	0	0	0	7.59923396876266	11.0541813443128	20.4776747607257	17.2795145574079	0
ENSG00000101265	16.9755878102811	16.7451392000197	18.6249294356055	12.3561847167306	18.0936740158786	0	0	10.9909251208912	18.7994572861746	6.06056185342654	8.22219021966709	0
ENSG00000101266	50.9979027306716	45.8192328747969	37.1870859096589	67.6587264766901	50.740102264103	20.0077236517461	0	0	0	2.61962749908926	2.19860341887417	0
ENSG00000101276	0	0	0	0	0	0	0	0	0	0	0	0
ENSG00000101280	4.73808519674942	4.7209123233484	9.45062596342385	0	0	0	0	0	0	0	1.86486115179488	0
ENSG00000101282	0	4.36255048579894	5.66897489264965	0	0	0	30.1427761995117	15.0445736921113	41.9591387656784	22.5796930702193	21.8981386377947	0
ENSG00000101290	24.8117753331952	33.5252611958082	25.3091980031413	31.7272140887661	15.4287511375221	0	0	0	0	0	0	0
ENSG00000101292	0	3.11022082371635	3.39061125763354	0	0	0	104.320167327928	40.9766750103836	95.6539705537981	56.6880966373552	51.8260599449196	78.3573423998451
ENSG00000101294	13.8006777145004	15.9980930703333	13.7811426118745	11.4680903836423	5.6819886920996	0	0	0	0	0	0.331766389955207	0
ENSG00000101306	0	4.3034691026542	2.01704433956891	0	0	0	0	0	0	0	0.0179923823032712	0
ENSG00000101307	0	0	0	0	0	0	0	0	0	0	0.331766389955207	0
ENSG00000101310	39.912254192154	36.3284836740951	33.7821590907668	74.7005267901972	50.1665105824455	93.7627709158543	0	0	0	0	0	0
ENSG00000101311	0	4.19386037416685	4.2457599487676	6.4501641858587	4.41473647206445	26.4529786438859	60.7995112209533	17.2894344701885	55.7284422048466	18.1484334075449	24.592206276291	0
ENSG00000101321	9.12207996212836	17.0172141729277	18.1397645071676	0	0	0	0	0	0	10.7716804783058	8.42603405637532	0
ENSG00000101323	0	0	0	0	0	0	0	0	0	0	0	0
ENSG00000101331	19.7975411686487	17.6670892295799	18.452123359962	0.826483889709965	3.54019304465132	13.6639443200499	0	0	0	0	0	0
ENSG00000101333	30.7086096908758	60.9258664052774	53.8922659261533	25.4163430337994	28.8318649716329	34.7116753123764	0	0	0	0	0	0
ENSG00000101335	39.4512606546424	22.8536419483745	24.0428811361086	0	25.8957219490455	0	0	0	6.33105008368862	0	1.81088400488507	0
ENSG00000101336	0	0	0	0	0	0	108.333316443031	43.3556178372466	95.2656813711426	49.6416377666311	57.4998879734541	79.3121359923955
ENSG00000101337	41.8428826590024	36.0781176947254	31.194992217071	87.504608236959	46.0862653218471	59.6199957500422	0	0	0	0	0	0
ENSG00000101342	5.34234410805919	1.64878118952156	0	0	0	0	0	0	0	0	0	0
ENSG00000101343	0	0	0	0	0	0	0	0	0	0	0	0
ENSG00000101346	35.6709579535945	41.0415693388943	35.4276272301039	21.7991390050168	18.0509279419982	0	0	0	0	0	0	0
ENSG00000101347	2.8901009653643	6.88430780659841	8.39551652217768	0	10.0742620189014	0	0	2.60410450908864	10.8422254451131	9.09859895111541	9.44722911704054	0
ENSG00000101349	5.12398204370323	9.59885382640598	7.03270955125691	0	3.73727417984397	19.6210064838609	0	2.75799875450267	7.03994280803825	21.0168951849366	16.2861912646664	0
ENSG00000101350	0	6.79569077136628	6.48664992132719	4.6560262890772	4.87338122271124	0	0	0	0	0	0	0
ENSG00000101363	27.0866898367155	24.0150244046344	22.6318405555874	31.0727055381069	21.4802587380994	0	0	0	0	0	1.21713538887712	0
[truncated: 24,116 more rows]
