# Supplementary material for: A panel of induced pluripotent stem cells from chimpanzees: a resource for comparative functional genomics
Source: eLife journal article supplement (doi:10.7554/elife.07103), 2015-06-23
Supplement: supp [file elife-07103-supp-v1.zip › elife_poa_e07103_Supplementary_File_13.txt]

ensembl	C3647	C3649	C3651	C4955	C8861	C40210	C40280	H18489	H19101	H19114	H20961	H28834	Hutt45	Hutt60	C3647_FB	C3649_FB	C3651_FB	C4955_FB	C8861_FB	C40210_FB	C40280_FB	H18489_LCL	H19101_LCL	H19114_LCL	H20961_FB	H28834_FB	Hutt45_LCL	Hutt60_LCL	adj.P.Val.interspecies.all.iPSCs	adj.P.Val.interspecies.fib.derived.iPSCs	adj.P.Val.interspecies.all.precursors	adj.P.Val.interspecies.fib.precursors
ENSG00000000003	5.68676776576177	5.75732648896324	5.81266651030725	5.92142878468825	5.84230803681142	5.68574759543878	5.92696252249033	5.35104658580946	4.92824866688376	4.970112259659	5.16531539164442	4.96167991577841	5.32337528635	5.02296539920617	3.8895070906632	4.08661387309201	4.155678198641	3.34631092203716	3.81481768177071	3.47235091808882	3.74439768922235	-4.05747023698786	-4.90039715100577	-7.66161974992781	4.00122244278444	3.91294559067517	-2.71249082088885	-3.65927091190774	0.000106037763031849	0.00572259664635459	2.33326055519624e-11	0.635531208420394
ENSG00000000419	5.24492686345187	5.35335665616191	5.52612162526716	5.75014750647637	5.86889104167499	5.535494782997	5.57077578697281	6.24507191077357	6.33552057459054	6.24083722956824	5.90892339471697	5.99360064619741	5.87193995796257	6.11643021259392	5.40699981437702	5.15152479212941	5.18488667788957	5.27059318911794	5.8064553442831	5.33618383867798	5.64717656872929	6.0773150700516	6.1666073044362	5.61204591488013	6.03101258124498	6.00948421867673	6.30133083413462	6.23869192059991	0.00257154523577191	0.119392381149756	0.000141286208898335	0.0185518121163266
ENSG00000000457	2.75146724830264	2.74795727008551	2.82115635886826	3.20131558656647	2.98844694878742	3.04688060669218	2.72431893683371	2.16000152850395	2.18105872095544	2.05507893657999	1.88570227182203	1.98382168892577	1.92331616303592	2.15206727088742	3.37914244152256	3.29577045246678	3.20969629117699	3.13549858667528	3.44375661659762	3.24122095641019	2.9962095739503	3.70540969508239	3.36469581725815	3.64048446754584	2.37164341358391	2.32264388326199	3.47904277195102	3.29204849527895	3.97008741114578e-06	0.000642961927775025	0.0223237612087438	0.000970526475888483
ENSG00000000460	4.02709304934214	3.73534986583089	3.78403023276504	4.00196074101058	3.69686811388657	3.81629022146004	3.93634574501167	3.01491180809885	3.21086302440016	3.08399390043236	3.38929435869365	3.31384155424324	3.67084559430629	3.70049680672936	1.46669247599169	0.928937814946832	1.70772146079742	1.87440191528399	1.80025039744044	1.7188111776043	1.14399899652535	2.59394663379024	2.48738866994861	2.69827320923056	1.11141055038046	0.538650768925392	3.83572441788679	3.58151927688356	0.0298056711841322	0.201299465385781	0.357609900376321	0.427294665495472
ENSG00000000938	-3.96657180341618	-3.07892898076866	-2.17945886423259	-4.45397510763384	-2.69506061531844	-1.97220126815897	-2.32960003593192	-2.57343716198951	-2.21169716763118	-3.08121500706496	-1.91781321541048	-3.63585390279666	-3.33875002557683	-2.85787926549862	-3.82332127428952	-3.07084127204652	-0.732998476403766	-1.54044888435132	0.624171115168789	-2.78037108152923	-2.0198537437573	8.36017288283301	7.64627569318391	8.19021628172601	-1.19611252215317	-0.931312851273924	6.84260130813874	7.05589477803026	0.945694886807998	0.969973934969227	9.12688335461396e-06	0.695254930549631
ENSG00000001036	5.10053526950709	5.27862411048029	5.10742858699398	5.17092434354035	5.14745899091745	5.24994765098896	5.18721780052253	5.74142668362713	5.60831134345278	5.72083410311772	5.35613980849524	5.45820387533354	5.83220796942899	5.07140199974697	6.75087368245212	6.9110014814369	6.72530728483536	6.44301425319579	6.1709907284645	6.23135693824771	6.50134399631647	4.23985386032779	4.68558878175306	4.08320239288669	6.79672122296176	6.65595886011281	4.7248901039407	4.58837743611758	0.0711266831020242	0.478498708911104	9.16560343230949e-07	0.502226498709321
ENSG00000001084	3.51640722474221	3.36000194370517	3.6207522347125	3.53489526838606	3.64198302294513	3.37428561483385	3.52693197695851	3.82127151964192	3.67902698778584	3.64777755095358	3.87956414189979	3.90374807153831	4.00082286648667	3.78233136006981	3.18173399363576	3.25519982095551	2.55157182424005	2.44953075305822	2.95820450667154	3.23664249453584	4.66789904753804	1.92633473990556	1.83877592981506	1.50200979171243	2.40693405471639	2.41400965717607	2.88363471509373	3.10929878091068	0.283887739964225	0.470394920323198	0.00816563057031819	0.220076123183788
ENSG00000001167	4.96645981515869	4.48095017417693	4.29068828809575	4.40761359808567	4.14360344982992	4.38562246961078	4.42791017652654	3.93295220406877	3.66620022595067	3.99057982863187	4.12310836717225	4.28070332993832	3.96806910935238	4.26399399545004	3.87068245762967	4.1892565940048	4.06379781288671	4.15809620868827	3.65341507205255	4.09271027990447	3.66688485854548	3.81616600153069	3.82551857400296	4.8567413603408	3.45483031930675	3.37295093998532	4.66101453082966	4.42131247603245	0.105446307185881	0.569463176471864	0.637211925296281	0.232423663015511
ENSG00000001460	-2.61304530988196	-0.857781622814468	-2.06988581757041	-1.05328060444328	-1.25226760043032	-1.25982913805755	-1.781532186576	0.827483049503665	1.41114469820156	1.1291054904289	1.33201832804194	1.59453366826993	0.970998033035039	1.30069472997306	0.989361395242336	0.141303953954178	0.662108978236693	1.18639529530341	1.15242143646938	1.09945248793882	1.98407232575596	-0.886804808626281	-0.254578216573876	-0.817216440781001	1.66143606799174	1.31003687131054	-0.544985258375422	-1.01221490577754	5.32282111225719e-08	8.5413841383094e-07	0.0227626290400467	0.294295719746085
ENSG00000001461	1.78341937458657	1.76897023982776	1.67529478612531	1.58842591015616	1.59875018627544	1.47032054365342	1.53768806232008	1.28070124606027	1.69487142339943	1.2146571657978	1.64020173036023	1.67098434427335	1.65291409317711	1.43740257319648	5.36422685277117	4.94147007634901	4.5569819417009	4.85352048990507	5.62291932201625	5.23935919732336	4.44742261690515	2.20937576134675	2.30903574438629	2.34782186521466	4.43876749622055	3.45021897840588	2.07101090015311	2.31502604690359	0.843292821024395	0.970828199195259	2.51032215027277e-10	0.00182137725428615
ENSG00000001497	5.45785741674172	5.31257776714233	5.42720902861609	5.7740596313851	5.60965498151774	5.8174237996712	5.57840582555103	6.13066331230004	6.25585793155652	6.00130155564811	5.89541491063138	5.93014197426263	5.85936434546371	5.91004124177436	3.72337540052539	3.76591375446222	3.4124585329912	4.2861798337772	3.54587423723568	3.85650019198297	3.92609889735645	4.7091793423018	4.89541603045844	5.00592985247727	4.06257838230082	4.050446467452	5.49164755475768	5.61512306603441	0.0167782052640707	0.211929904612361	0.000317720427918379	0.536013501367253
ENSG00000001561	1.11315616895135	1.11225049936737	0.87374902562569	0.323203954935671	0.673270588197752	0.826827929857274	0.64844541044836	1.4362791763758	1.30695854635461	1.3401422880192	0.454470325626598	1.32289517022167	0.626056515928278	0.793223257268268	-0.185803270726771	-1.77835434204551	-0.675481899759176	-2.24675786317136	-1.79293362782697	-1.30072028149262	0.420338184522263	3.66925046386097	3.45298361187317	3.59238209164269	1.59469068312298	0.194907193286395	2.81215418839044	2.52077169388399	0.659871386385998	0.893849494403123	1.10426372385487e-06	0.0161443309475826
ENSG00000001617	5.2145957091768	5.40635806489769	4.98182589061037	5.50194960432595	4.89022300448272	5.67190684395832	5.10793114256295	4.45305419208191	4.74291900681831	4.58901941369078	4.98660308200936	4.5672958503837	3.80705253856359	4.45931035663394	3.75911776322502	4.58187057624017	5.17800052657295	5.45291380045016	4.24696296974669	4.31577694703757	6.09990226988986	-4.56961402785341	-3.72971677569098	-6.39049767855187	2.74532330507417	3.53933517299434	-3.62999435314771	-4.32833431162056	0.0451906749042551	0.409694808753928	1.93656082438701e-08	0.0153613066547442
ENSG00000001629	3.46643873208827	3.54018524391185	3.21700433926514	3.16756236104465	3.44353498462059	3.21159399068609	3.30207192910213	3.89454211981182	3.87471812789691	3.92148192200422	3.93020448955421	4.12959064192529	4.01478720347775	3.95872889754849	4.58088466304672	4.55102417966423	4.43175576527064	4.26843678052538	4.73706864434593	4.60287066849762	4.47752741738044	5.0086161224296	4.73558868603387	4.75286062654092	4.8547665528086	4.6594047424142	4.32526116282917	4.27113189343484	7.01176822733858e-05	0.00267050734143179	0.169118434011574	0.312082474024113
ENSG00000001630	6.09815429564243	5.72972470814524	5.36704706523498	4.98444633407609	5.04655962719644	4.41561664871413	5.3024939240565	4.93835052972047	4.81407728790931	4.27274306127002	4.94984304061356	5.13967755708369	6.11577145640204	6.03947430125721	4.70106220586962	4.85750743734271	4.84292054718579	4.63556563593687	5.02709054647627	4.66321666724687	3.98527665781256	5.74771613980095	5.60112340807131	6.00270852145471	5.72096804608094	5.59483969834202	4.68059038403944	4.28690875287435	0.812160530150278	0.811096503998568	0.0413897255529104	0.153435263399267
ENSG00000001631	3.22174072720317	2.93586653240961	2.87001056524263	2.83345467701353	2.77721316226204	2.77753285746036	3.09820553664671	3.07784819602216	3.13933497022058	3.30007949502127	3.2135302380635	3.28124365118368	3.24056515698466	3.2039281841067	3.39483246364304	3.43645784302296	3.60407059782928	3.1553099253689	3.25644183207934	3.22787109129948	3.39617273792095	3.86026344778684	3.80920576816361	3.50890630241938	3.75992962970446	3.59433023973489	3.55230093164628	3.44380101603659	0.0255164550544932	0.119808031807547	0.00699267634320094	0.0984341309518028
ENSG00000002016	2.50914875590478	1.64273202877439	1.05631914602507	1.02109325180089	1.63353112059839	1.46923684480317	1.12854006769279	1.43735826193289	2.04758146406252	1.73151892907397	1.5939554647434	1.77209625221294	1.69687543892391	2.20142727171962	2.5608164463044	2.98444924199116	3.50856768361906	2.63104330922438	2.56596531140825	2.49400213171538	1.95081848108347	2.44119191179604	2.37639873188825	3.85774446483865	2.28262850907354	3.02623319327457	2.48282942846402	2.70108919413287	0.635620975094659	0.853933391304073	0.910352905987921	0.987201294985705
ENSG00000002330	2.55688158876894	2.84285855784073	2.5259156078488	2.91543363548674	2.60126527854636	2.62232009873872	2.85644227715148	2.7162903822382	3.04126987003001	2.56813455156001	2.26838779205783	2.236578794849	2.15005671906291	2.23913473695172	4.46931862239528	4.6886705539647	4.73154289503666	4.51160247122576	4.26999163160518	4.46899752345698	4.89203873106239	3.16504380179156	3.27685702382639	3.24138934928136	3.98543772496946	4.16613456953431	3.1574841279606	2.99395840521566	0.181444832627597	0.247968714908239	1.50945637181356e-07	0.0421922055824367
ENSG00000002549	5.76596718537545	5.66704089578367	5.71631113072093	5.87996908367037	5.511030110962	5.62059203120181	5.64112669182791	4.50848956239683	4.61003994481049	4.21718287480603	4.76702744964361	4.72619282196045	4.95578634890228	5.13643310290071	6.25879060815321	5.98363191685434	6.18750015471367	6.08661740434179	5.79204440137547	5.99873500818005	6.12830538612683	6.96951874458668	6.92839711939541	6.17346827965823	4.9506736509413	4.90585848499057	6.8680805434101	7.20742423697136	1.48380944401767e-05	0.00307698621406642	0.287643455998236	0.000535639523673011
ENSG00000002746	-1.81960011551216	-2.21823857001844	-1.75289143694239	-1.82988709370635	-1.41070262861478	-1.69019247672258	-1.67670180221169	-0.518183825688997	-0.684736893820801	-0.501189862433972	-0.12635154113013	-0.177359569243649	1.8811671205838	0.159142824820639	1.63892064759004	2.39943944761936	1.49306160488739	-0.418641134628863	1.79074794328846	2.25466762618618	-2.18752845910961	-8.09321247686441	-8.22254807123024	-4.78326628911562	-0.156117810845348	0.0223884364979363	-6.29685235220084	-6.78581391511869	0.113527557479629	0.335052298097455	0.000103075505260662	0.443827346461064
ENSG00000002822	3.88664879365526	3.85741987359942	4.07758644663165	4.0553484023845	3.57457724990492	4.04419665863479	4.01805828476052	3.58028033512807	3.97873030980783	3.7794808292816	3.63549945064302	3.65341794211581	4.05824027729015	3.97212285682243	4.34381744381476	4.31568180180044	3.51589121452999	4.47058281169575	3.94474338296778	4.30035166074508	3.90504055906601	4.08905587022242	4.2415726629784	3.85415951660885	3.52486895701283	3.61081076389012	4.09695164787975	4.04648782083073	0.331792054784845	0.337991016046596	0.0537240268957663	0.0591753228612557
ENSG00000002834	6.9055340334709	7.00027164192343	6.84930622501771	6.9474201104354	6.77681871108947	7.01924365073189	6.89800010980953	6.84448871697194	6.9280930874008	7.07819935217808	6.98864200697339	6.73417571088126	7.40662248297259	6.83031219513123	8.06491258873835	8.22214194422047	8.20738524980535	8.39166230010609	8.20212801157615	8.03588050655136	7.78256698731894	7.17261991372908	7.26503118934163	6.81264926262917	7.74729145352022	7.61501799660396	6.95965459209144	6.7378693090314	0.893050250347917	0.8650100984397	4.86572871997841e-07	0.0377077123762889
ENSG00000002919	3.78483264996116	4.28490457763234	4.40894367063269	4.48989601097539	4.5004763377972	4.23716106793418	4.1912242871026	3.66573661427674	3.87117578091621	3.57437382978579	3.87791759399704	3.42401743819958	3.60238324725582	3.78412280397506	3.87234479309749	3.78115970148708	2.99270403534643	4.01221440910884	4.74947572148101	4.17641605206221	4.01319409760748	5.82314324459584	5.57387427484405	5.88327790443788	3.56066717596951	3.5308728191843	5.24188316128917	5.28952187670105	0.014291622263092	0.115674691622633	0.0116299247361422	0.399479684234432
ENSG00000003056	7.05196439433777	7.23564824110659	7.30900810609904	7.31402702235137	7.37004639589091	7.63908513198894	7.38162809176368	7.80202032108245	7.81918288834574	7.89728670047564	7.26548923941048	7.50279678327872	7.02871141265437	7.17548136940958	6.09342132518938	6.185478897462	6.22370470672361	5.98231266921687	6.07790633372974	6.13145881317643	5.91497007192336	7.25674927556319	7.06387901960279	7.03674817559996	6.30359828516912	6.35801070803636	7.04621390356705	6.79276923833982	0.43820290067605	0.880274394458315	0.00039092077862804	0.426482573179548
ENSG00000003096	2.36375536573281	2.11006364411993	2.37869330743179	1.79892412272638	2.49693770455022	1.78400359544734	2.14678116122571	2.40524558632924	1.3932132127587	2.43129734792237	1.79221037455446	2.25102851360305	1.03363085073718	1.40965872310381	-2.40642449457118	-3.80412135164228	-5.19440233064544	-2.03929676554796	-5.62180402128254	-1.84739659961089	-3.05881556158692	-2.27512739179417	-2.0890677305964	-2.03181954542672	-1.65153751890324	-1.8434495653103	2.31772126960199	-2.68344924016558	0.576995589654714	0.912416295999226	0.0742953498137806	0.4000646293879
ENSG00000003147	1.3800405972234	2.0411928236358	2.35331653664639	1.91144668158245	2.07192821357363	2.64716595716394	1.89069254325264	3.39783305933048	3.6780558042465	3.53637663985981	3.51826902596647	3.46786310094743	3.48664905915742	3.12147656967187	-6.78847185952084	-6.8461232414895	-6.11317807205096	-4.3284810383318	-6.36577276261926	-5.53196170541291	-3.10004436358766	2.8349887352024	0.178994771899847	2.0303359795095	-2.65564988539679	-3.70628974129387	-1.04023069471544	-0.964652991643657	0.00113742126214396	0.0183309267975308	0.00170902473817958	0.37567445785462
ENSG00000003249	4.14152738339351	3.79990219104032	4.29785021126192	4.40088251955584	3.40157297880211	4.32174651655058	4.15888063387335	4.82415505796421	5.52434713826795	5.38863198405919	5.38695385426118	5.12812170452718	5.47281589289895	5.21753782378654	1.1262704457998	1.6178609522175	1.3607297477458	1.77950936098815	3.3786972930117	0.521025712982999	2.20264513927253	6.89863298175439	6.82861751089669	7.37871675162976	1.29865567803666	0.968131734155287	3.0885858542154	6.25454072019025	0.225220036532809	0.458444810087734	0.155042184038501	0.88842088530694
ENSG00000003393	3.7998153657893	3.39734125603843	3.33048887915727	3.34967682345601	3.5918624804657	3.14589588553828	3.39153909274645	3.39680109199752	3.55043791356975	3.59268142717589	3.89003093990643	3.77976970248042	3.83227956570812	3.80015157344909	4.52215064813981	3.96393487879457	4.24199437167039	3.91699578631949	5.00822301941179	4.31247623214679	3.99710108412822	1.23380172297174	1.55275801578517	1.94905823916613	3.53126690247253	3.14835892830912	1.80872854706727	1.55175928180343	0.123109235702558	0.206417694375795	5.21463176205214e-10	0.00441580503783131
ENSG00000003400	0.175535520880284	0.216871869106617	-0.283123260709494	0.435590043880977	0.183541058200116	-0.296329592499706	0.274457248206367	0.393967190656142	0.548656126479564	1.22255894041837	-0.188795929020612	0.0943153304774698	0.0686024087554369	-0.320428515932095	-0.287724273960515	-1.4676944508898	-1.29387878378507	0.530847444326472	-1.77055159794149	-1.90843918160097	0.676230920231661	2.08944995503672	2.33515573193667	1.70020756280097	0.778324706304959	1.25932843539385	2.35025932615234	3.10778936097349	0.899737024663985	0.916829504718856	6.97575841560503e-06	0.0123901950141519
ENSG00000003402	1.05175602927992	1.02301255184015	0.693806719958206	-0.0454445563944113	0.938538409954849	0.88278555750409	0.751093626079785	0.899090741514376	0.777096196789249	0.8843190366054	0.990585736070405	1.18888504739357	0.57810942398986	0.703386011606165	3.45685040820643	3.18278720958962	2.6901332652524	2.90891880120187	3.83073198693082	3.20486020837675	2.95053119140354	5.4468156162799	5.26695742554448	5.31811225316095	3.47552911212211	3.51708596752303	3.99197953873243	4.45923331529858	0.783244808630849	0.738538970137688	0.000317699269241516	0.555994893425744
ENSG00000003436	1.79050131272206	0.958181243255861	1.4324708961342	2.08142196432896	-0.278794389400852	1.28673916269315	1.58627897846897	-1.43308218716409	0.424891509118718	0.450680571009007	-0.333255773840769	-2.01885309333726	0.826022998188324	-3.64850880159389	5.70695737412653	5.2497235520282	6.21095684016174	4.62252799973317	4.20745630534916	4.1754777927467	1.94843314488314	-7.01376816145151	-5.58358297097147	-6.52190098921872	4.0707788417049	3.99264339010563	-4.1185293412611	-4.08475527052025	0.17395569487723	0.428242899583099	5.46737532217013e-06	0.628461602231
ENSG00000003509	2.90474265024472	2.68048616531638	2.90191677716034	2.96533934271728	3.01227505073752	2.97438453051172	3.06883178299319	4.16041608711685	4.32002745459694	4.57607417642023	4.1704913122909	4.12631125959355	3.86321192962134	3.79008330502854	2.60434124921155	2.67062393478646	2.86159047347065	2.33457005059522	2.6759475172129	2.4247332464915	2.70101743297209	3.23979449741556	3.11141563948437	3.29979526527141	2.70736176771298	2.85669064780793	3.1223221965705	3.06039848465129	9.89805563561344e-09	3.70988695947652e-06	0.0221000846056969	0.595790329194566
ENSG00000003756	4.3745026995268	4.31267520992841	4.10007290822469	4.16384415181031	4.25827953522636	4.19999052031026	4.41975479988973	3.50403865674612	3.83058067125186	3.63928059836973	3.80533257496505	4.06458855816523	4.12295243607603	4.01414723607222	4.71287495728166	4.83706421887874	4.54756515017339	4.52918937269957	4.55091281068203	4.61316053728306	4.66233142665828	5.0689219246552	4.88500439216176	5.06442810662456	4.70628885786452	4.93558549947094	4.79895699400389	4.89079280219325	0.00320096644674258	0.111220418407167	0.0269209822282119	0.385937126189075
ENSG00000003987	0.552922727044473	1.0192440953946	0.971714334713615	0.543347859994735	0.658707443078903	0.248905840123316	0.978892113124277	0.486640541133754	0.500533351705457	-0.249250184052328	1.17532879334427	1.1127374020881	0.981283229602637	0.60970189176812	-1.03152385354351	-1.77123316326817	2.75274942100619	-0.753973695119338	-0.326546023443554	-0.708478886042331	-0.486021979259355	-1.38367233768167	-1.3219606285632	-6.28105434143349	-1.23068639550711	-0.965108197489036	-1.60373707693613	-1.43208163881972	0.879875085817131	0.681693045854046	0.0801505758159397	0.68271429813709
ENSG00000003989	2.68244664497232	1.92689749196051	1.77734587843177	0.193459848117254	1.65408399628844	0.252616454111341	1.23489428485182	1.45410030928831	1.40931001436374	0.427944873319553	2.27313147059131	2.36309528156083	3.23549209968531	4.00409067883816	-1.7064474729633	-3.9799057377642	-3.0175522119103	-2.28147747170299	-3.58124233072706	-0.925152795077785	-0.144869983465545	-4.99341617237728	-2.7808742740746	-3.9698013535708	-4.324800001905	-4.21849573596472	-1.39667526968409	-2.27207287475679	0.199087972473936	0.354032579253497	0.249652007112114	0.407565510777871
ENSG00000004059	6.00915039892025	6.45197913329468	6.40267887865342	6.64198108182657	6.23289821879635	6.74789337773318	6.45722475446831	6.60854110835761	6.71557819240408	6.95999149263672	6.42587620214519	6.44852911015762	5.9695291786694	6.15253400374155	6.39904419932957	6.72603787907017	6.37512289213589	6.59452257916501	6.43407500279667	6.6106157323753	6.80002741197903	6.16824623423508	6.3837780360917	6.37026915189266	6.79014228900371	7.07278937428893	6.13887386228495	6.17668393648969	0.878961087962979	0.973644815584193	0.888752534515681	0.210738181823226
ENSG00000004139	1.37839392722042	0.26053178377175	0.948147208120515	1.22920835216971	0.993319840155629	1.03802515912081	1.37269028603628	0.441944780977971	-0.10212014301595	0.913391429438388	1.28098101868083	0.944064514938863	1.42077886529509	1.18062385667164	1.51180917610847	1.66161363803614	2.30800027012715	1.40240765524647	2.46181699643635	1.71392258629801	3.27708405956279	2.0979335315623	2.13439489865308	2.17779103956141	1.6601053985065	1.7102292293796	2.07842570640215	2.02095744838627	0.860534649349596	0.937729379380132	0.784669134728619	0.667345737020972
ENSG00000004142	6.18687382775775	6.23318668547626	6.2358666855849	6.37024359048366	6.17537577919231	6.42569710505143	6.16236116721517	6.12519449833498	5.98942712330201	5.83232415114624	5.99579551958662	5.91682954978926	6.03550123676131	6.13868870996	6.11410808525712	6.13215403242349	6.28901848735645	6.34120130023257	6.22059867700936	6.23271601584736	6.59587626852301	6.08220016498983	6.2048587279932	6.28169989965319	6.14725899411222	6.12856342404776	6.72974561821561	6.57806126066872	0.0382225783597111	0.150304953574027	0.876735330303282	0.577801920415325
ENSG00000004399	2.6593131964654	2.58419200239083	2.27380436661107	2.69778846908253	3.21641808912709	3.04694245095334	2.64217108415282	3.97179464234573	3.86019223415723	4.26133022344489	4.38548496175848	4.2226134045135	4.35245158212654	3.36923740623038	5.54833829919559	6.13015553623727	6.55211807225367	6.05893857038061	6.46541992307023	6.94923488076919	5.45750516824842	-2.04300557245006	-2.83944450009187	-5.03916782066964	5.25553321615576	5.42551161118875	-3.13744767339001	-3.12974526874771	4.75146779062522e-05	0.00110937208709833	6.04249369348045e-11	0.0433214755420394
ENSG00000004455	4.78298670224609	4.77869315422155	5.35818661359568	5.1462056240019	5.12923216921573	5.28165664153	5.28780561061281	5.14954360758309	5.10942501185216	5.21865690614353	5.01795607481949	4.95070703841574	4.95649590686479	5.17076039688582	4.19197786901539	4.13913860647876	4.4930876381497	4.28023980855996	4.19067766552346	4.31732911609157	4.6697585420495	6.49587425108262	6.63589792142335	6.94103245090947	4.90400295431617	5.00104302138094	6.45266879725769	6.39049980573162	0.736544064987356	0.663812595698845	8.84850564578229e-11	0.00849986902065327
ENSG00000004468	-2.71149660127543	-3.3525007469922	-4.1124521162225	-3.92985745930227	-4.02056048272418	-5.57133075523064	-4.27792665026541	-3.48033211441638	-4.93328808180622	-3.38655487917817	-4.68094113880435	-3.06361463687356	-5.35683470669962	-4.24290845071042	-0.380951343178592	-0.952877874997196	-1.8550184086949	-4.30771412022945	-1.21783263105272	-1.04278390051784	1.06537468912141	7.67646164467111	7.75881458703176	6.71062093104358	-1.95634446795132	-3.0802177521996	5.76776495888415	8.24980305050953	0.977537680965025	0.979928871145422	0.0142309410902835	0.735853114342714
ENSG00000004478	6.5114869004094	5.88398749162106	6.07241393786003	6.22624080252537	6.02118980999056	6.13517192479144	6.17504735445406	6.31602495305676	6.30208859109802	5.99865754632311	6.23716101877932	6.19695117894774	6.17933796179489	6.61673695769397	4.06508154996893	4.12651955017227	3.87114297915588	4.18708269873967	3.75097431923397	4.05131182150586	3.3680960206515	4.1617479318444	4.28950305723961	5.00199100079501	3.40552038733985	3.49372453129029	5.06601912944964	4.77034266979097	0.60256296002686	0.859043175391097	0.667565170734794	0.305242307687069
ENSG00000004487	7.83902620336267	7.95666852718425	8.1619741951	8.16956898018226	8.13467350079445	8.00096773091173	8.15111064781182	7.85320886756514	7.73177234288205	7.51492623152768	7.95326817755819	7.92730974026054	7.41327528970419	7.69996333137267	5.94753584975358	5.85922621692108	5.79333676008936	5.82570160317611	5.9582443768623	5.80372445618778	5.81716074137398	6.34937523140227	6.4367083376368	6.38139263337803	5.84541511126762	5.84493759714839	6.54206526478351	6.31294662944256	0.00538144746430208	0.487970419185305	0.006673567239102	0.960443291804904
ENSG00000004534	5.34514867347992	5.11895970404	5.16819166177947	5.10419261885236	5.23898567784916	5.41813836858976	5.31951061515864	5.1140008615655	5.10388981401014	5.39047335325666	4.90375459638769	5.14075638069895	4.56133127733579	4.97049311404269	5.22281521538484	5.14706331564445	4.80271293740535	4.73600371668291	4.9040139475103	5.15941601128992	4.96371800188517	5.85543766839092	5.67793376120632	5.96549285622078	4.85430241994026	5.29632739105041	5.23217250941239	5.43364389402061	0.210399543580544	0.478265596640628	0.023609766707001	0.839366300061488
ENSG00000004660	1.70539997564984	1.77184221954412	1.59790685249178	1.90398843115273	1.73930940984247	2.04324702715119	2.07059331288162	2.00139639177865	1.97323772329194	2.13488964008153	1.84980734444034	1.56089321462179	1.58565153933354	2.21340872861874	1.77002901685922	1.49510245005244	1.26033135979906	2.49726666190612	1.9186597662761	3.15461532152317	2.31512268383818	0.97399182059351	1.24327993054896	1.08307797839883	1.38297860873496	1.19017168600021	-0.792510994330406	-1.29129284465409	0.985686839721468	0.874312363485419	0.00282836516823019	0.280938054405566
ENSG00000004700	4.64713922887826	4.25101978518629	4.33031676646713	4.32247902835021	4.55347671478683	4.15701753279842	4.60780032190278	4.63877786613676	3.82045742920732	4.6661056348176	4.92865606035302	4.72183149704437	4.95731738446334	4.3962923329523	6.06112819851915	5.73353234733306	6.04871964385541	5.9963595909362	5.60301563667553	5.76582951423685	6.25189192015791	5.46865446133081	4.65479967433685	5.25683455297051	5.42581624363793	5.15963675029763	5.2180178828233	5.82586511640936	0.291898587162166	0.284508367045155	0.0018512941844217	0.0747668736003385
ENSG00000004766	1.07809073644679	1.27438414839395	1.2285621762557	1.06505973699747	1.08331611351189	0.884327059910162	1.18414236345057	1.35252328313872	1.2623622261492	1.33413303161447	1.32713242522389	1.68717879883946	1.59936031129091	1.68243225631381	2.59243190846575	2.63203088505168	3.21626443237183	2.25688333973403	2.87615452884476	2.55232735538738	2.44926460152965	1.95212926317209	1.99549277075411	1.62657706437627	2.74687783981697	2.48936048498074	2.72644312993542	2.44061542260142	0.149059229906541	0.335858622860338	0.136729101440956	0.960443291804904
ENSG00000004776	2.70280115295622	3.06526562086061	3.00888374107592	3.01215420386587	2.87459255858536	3.26255147993028	3.71054285429648	0.249534184107988	1.33626197141027	1.21793342129301	0.470936861406618	-0.689693745593895	0.902628697236474	0.473314263274927	7.04059567453674	7.58418674070882	6.44561107067162	7.89989378838362	5.39139216733519	6.80772941092714	7.51151369011388	-4.26185616462018	-3.47097602426906	-1.69174917051067	6.3690096726805	6.37776421100878	-2.54779712961815	-2.44983069630492	0.00652902575781044	0.0830204417955677	2.13650812221363e-08	0.302999083097015
ENSG00000004777	2.97850089346415	3.07969652422149	3.06243972309023	2.90350944842014	2.96010449787129	3.20394129600348	2.85386941799903	2.6923638380681	2.78731692995159	3.01866659470603	3.10700338934988	2.79859618849018	2.05078544431145	2.52980964238187	0.769814834103233	0.44122523699391	0.301074645216994	1.21394234311424	0.876636692025462	1.04436993942205	0.628838796427587	3.10536834816249	3.08251232407516	3.0291101169089	0.984555624816892	0.860469690053334	2.16741538359062	2.32070918697946	0.27929222385984	0.885098793528241	0.00376637186868567	0.879926824456717
ENSG00000004779	6.42199455845485	6.55851387777973	6.53025001323984	6.43372134850304	6.58401631959744	6.44827675229831	6.40532764219946	6.53942716490736	6.6697419083843	6.55758954126905	6.24506569742455	6.29254161674719	6.14968050815211	6.34862719735766	5.49408124213338	5.35543688230147	5.93844025739719	5.7508211275043	5.30929384421513	5.39024000110671	5.52988349579884	5.8806027985819	5.89748057113778	5.86193734184736	4.98407018803183	4.93232976729017	6.55360756901396	6.45872949595464	0.471817698488742	0.452264214411156	0.981346639448775	0.104217878086721
ENSG00000004864	5.78169948311477	5.74921731617435	5.56410713308883	5.50735459453495	5.60680759418826	5.2975303446319	5.49187775841932	5.2451161109034	5.21983333213814	5.27463831921028	5.460861686271	5.36901451498112	5.54759663310342	5.46616456601246	2.19852943998617	2.00652095362825	2.10754021032054	2.61013474511844	3.25804435221504	2.47501577048469	1.96559026566302	2.78916068924204	3.09992447002958	3.01097249770317	2.52652490251639	2.57128978818823	3.37930829696606	3.75692431854342	0.246861436561148	0.604742289481996	0.0411772171700035	0.758417926148225
ENSG00000004866	2.21525319050924	2.3184166706614	2.30783867445876	2.19201166534149	2.05611153891777	2.2918773285184	2.27239957056301	2.56944881363917	2.38289029661593	2.49870890075327	2.34075259936079	2.07870205816737	2.62765835511571	2.42625125922497	3.05538210092453	2.76139090185721	3.5065719452881	4.09012365792827	2.66553932597102	2.7172798885886	3.03737438221115	3.63514823551092	3.67940306983261	4.92090558092791	2.56704035265377	2.73099411549083	3.49846039372701	2.37060679040339	0.827442724871155	0.969973934969227	0.882740109106998	0.543252649643268
ENSG00000004897	3.92002728307976	4.1586650077594	4.12433306316895	3.90473962540386	3.9857701360764	3.83467103459074	4.16218112684192	4.04647296923581	4.21323614680683	4.04194937465877	4.16466200827566	4.40984217714143	4.15148743675281	4.17133471076749	5.02046405931973	4.80816672568155	4.7553162079747	4.98773851736243	5.37681791541854	4.97882953131456	4.9732128300807	4.82189118052649	4.64280993482381	4.56609132958619	4.73955556107496	4.47550145714519	5.10962028869436	4.88919510453075	0.181305288887905	0.233231721873234	0.0244797925370371	0.0942640169187375
ENSG00000004961	5.21641411751973	5.58649175056525	5.56122741152181	5.46945020269075	5.81834890773218	5.30994432238073	5.43179482671836	5.09263542489629	4.97587133809799	4.67665446857736	5.23305564234489	4.67110903626907	5.43425282047319	5.17447816219733	5.02608172487111	5.04148270910014	5.33010262363587	5.19814286403242	5.79715756994287	5.07418634765003	4.68824554119854	4.84380597136816	4.90064178845931	4.65127817536559	4.86410361874765	4.96955447677151	5.49711323433497	5.14201102835504	0.0233262479102043	0.110243638980506	0.322189396807884	0.581180410980643
ENSG00000004975	5.02757947536	5.3888053031043	5.35510817249777	5.45279958879104	5.38949878872689	5.47108544639134	5.36848520678985	4.90201147492368	4.7630286947593	4.84088003121575	4.99157001038956	4.97886823103533	4.96714969051529	4.94591283992232	4.87705365179154	5.31930790372629	5.15479000160094	4.93096408162355	4.61615924415963	4.94659543646057	5.06770395140686	4.73713949631811	4.75209271771621	4.93615233477489	5.25374863571617	5.4862317560746	4.56471762747924	4.53014587629118	0.00162728974451884	0.0710936738897218	0.683528214424025	0.0634935261612405
ENSG00000005007	5.80123925137563	5.71820827364624	5.71174874012887	5.67555257480544	5.68374751969836	5.85184453082052	5.65407805528219	5.53003979816161	5.70918678086034	5.42860617609187	5.50425149583485	5.52218903988534	5.46514353185498	5.41475958373546	4.79442099197175	5.27007657661263	5.27527653630965	5.20440346395674	5.15546621106464	5.10992898906499	5.12236194617807	5.6917923222248	5.63508691180498	5.73617823170231	5.31406707706592	5.82299341113246	5.76962141068925	5.84885594892897	0.0445137233455163	0.230974206315058	1.18206046129985e-05	0.0131480972159786
ENSG00000005020	1.12601618730701	0.519828310492294	0.661897402618224	0.654538961083271	1.19564907792593	1.04938339184619	0.745551801868077	0.0704405354520863	-0.0308802771143064	0.450203713665117	0.471354960060774	0.558871471651294	0.753260078138772	0.240857056002682	4.57702134288219	4.27347321203788	4.62833133840543	1.55184963506897	1.28043852120634	3.65458200977166	-0.837202700724212	4.08038386246138	4.04283050039938	3.76487042511297	3.52146827278932	2.95272954281268	4.55403032369528	4.17435319600683	0.758169161211741	0.905470965935204	0.174081027704504	0.771123510260045
ENSG00000005022	7.88704053675557	7.99735230142833	8.03891196763733	8.11535193323279	7.98147691479311	7.98454011516856	7.9888451632735	9.14437298715092	8.60007677682778	8.56975807745745	8.46186059875871	8.39242547339278	8.25822460756172	8.39469032553961	6.90991489377138	6.66041832771423	7.5602332447956	7.40136663353072	6.8528289558025	7.10478482557858	6.78779839758692	8.31324303424529	8.54270785774716	8.49712249418975	7.04588920396348	7.03172065394292	8.9869956351533	8.88456296754654	0.00528269159232953	0.139355315278942	0.000175379840260655	0.993765567554216
ENSG00000005059	4.01600674067442	3.567332233517	3.67600201471138	3.86266420140975	4.08937794800958	3.5852991932107	4.12591109333481	2.29040392319982	2.32202583154679	1.75751375498822	2.91828708757208	2.22698687595221	2.33589916070592	1.78769151302762	4.13490880015866	3.57104385856122	4.25096199723447	4.2332753215924	4.15770943269742	3.72507867974656	4.33413727026027	4.42732720544172	4.61380581264343	4.14580251002402	3.66197696817351	3.9684484434706	4.72941963869592	4.86249196683588	6.20207069027024e-07	0.00139060415666519	0.456422935072626	0.570466101471802
ENSG00000005073	-5.1581439991777	-5.76228871520103	-5.61289726519435	-5.39607417860194	-5.64953471216833	-6.81663607402919	-6.01435694222181	-7.63640854538369	-7.23724014428054	-7.37576087137338	-6.91299504108556	-7.43948319533388	-6.49753748961004	-5.97394449031593	5.39785600743752	4.96660341690611	5.70564817432118	-1.00179388872179	1.36948288748694	3.65133910012677	-0.307294375282956	-1.42218158811842	-3.06531218934095	-1.39315092726271	6.97629902958953	6.86406561850589	-2.80068953742998	-2.2034605032659	0.715939855486214	0.834883001091501	0.652792745642483	0.000250604563884281
ENSG00000005075	5.20173790438261	5.34567439927531	5.6022413021157	5.65422246377991	5.44799437360433	5.59095980975602	5.28551387015807	5.62219570015153	5.51582457495241	5.75089469405191	5.1834799992209	5.13793792963174	4.81378528388681	5.19643941418901	4.68660471944253	4.7263337732559	5.25464146977873	4.93655038512847	4.75485787942654	4.7604494066728	4.85494412375202	4.71750709373003	5.11708926111578	5.40553073763098	4.66663663427956	5.03093936810143	5.32515126905659	5.48913720608781	0.388155039108028	0.417638034159616	0.436726364488381	0.998241987284124
ENSG00000005100	5.39736090090028	5.09600566108042	4.94656777250183	4.69511478766883	4.97861962000092	4.40366308716282	4.9084927384747	4.66331303139471	4.6709293755143	4.14271795076776	5.36131853749553	5.1408343126452	5.51103730286507	5.51714476463954	3.19979188088424	3.07826059226563	3.60024308652218	3.47694304057455	3.5175174452015	3.54931765884464	3.15664858245612	3.66147104574347	3.81414635514413	3.99582044515934	2.96426563658176	2.88665818552322	4.47680628793	4.28804315661899	0.55328559520513	0.436109099616164	0.773032972339109	0.495188710060392
ENSG00000005156	3.79484155489983	3.76305527130158	3.40965909959914	3.7767279523448	3.88318526110712	3.8654172908678	3.67998744136446	4.28232378200433	4.34179136075111	4.24013826097873	4.54974429020167	4.71607002260238	4.48743240980317	4.56708324472862	1.68144573014376	1.582324490918	0.455871701584024	1.77277722797383	1.54537707013822	2.0502060660434	1.47968018415783	2.69691069285837	3.00710308372336	3.29741628626852	2.19373077933046	2.24160013850558	3.1200551782621	3.16999734220086	2.81316395135028e-05	0.00065607828639783	1.310169711592e-05	0.0725945306034315
ENSG00000005175	4.4409578601108	4.45643562987166	4.57922317416947	4.50406273415867	4.50538434177547	4.52692671126407	4.52014062044489	4.90824038773269	4.99908051746216	5.0233009577249	4.8519918281797	4.73164787482208	4.79313321458151	5.0249783250542	4.23185876571542	4.10717174648995	3.93706860675767	4.19505392963413	4.73422326068513	4.08986170020072	4.04986046677442	4.05149766784861	4.06855192735781	3.91364841104294	3.98450482101515	3.82932963776953	4.54390893930758	4.390492719972	0.00782221119145652	0.196277811950941	0.311485578783941	0.298057157301174
ENSG00000005187	0.935721918878458	1.92496957781806	1.76971762522309	2.23324607294768	2.97230656338692	2.22453759692638	1.91084806863715	2.61337302045911	3.09190050007883	2.71053328701127	1.80585711887636	2.71638328071228	1.11718299293139	2.05921225486521	0.810059248039381	0.199154797473818	0.27703399848563	1.00593846338261	1.07787959137796	0.86530760381706	1.06247231950344	4.05423626922517	4.2890184468377	2.75587515780931	0.594379891417307	0.142548873159407	2.96024588764981	4.02207431859172	0.580553804336423	0.76088498212654	0.0830268309381793	0.83795164676172
ENSG00000005189	2.5338222074138	2.49934980199512	2.44464223578446	3.07181722616152	2.5813033988193	3.08218901986228	2.64793504869681	2.02369746703462	2.18741399147523	2.37303403028679	1.81726805547778	2.62342773724429	1.41056505591696	2.07571831559385	1.86793394945143	1.38244422324728	2.0790163777418	2.57808073819856	1.8559414611195	2.23115108327741	2.00537084306517	2.9078991150199	2.94110849395004	3.20333009757103	1.14853958545992	1.03758830700817	2.73698638264949	2.51778165733892	0.0175836371530153	0.282872903464159	0.927048074405276	0.120496581571954
ENSG00000005206	4.49744578889866	4.59146608551196	4.6208008191448	4.45271581335375	4.37138447135592	4.81091820258278	4.69100035546436	4.60290477291229	4.67497519207279	4.70246390246247	4.5503072146328	4.55948781310657	4.68144921867767	4.8317308989083	4.48067609147061	4.70784932256965	4.44582188289712	4.71978403941594	3.99941389207236	4.76805427342814	4.57746228710654	4.38595312565524	4.20509791347169	4.59008776265631	4.6640265583844	4.87223927865403	3.97547818339534	4.39025091569196	0.820572228902804	0.941419967158008	0.923331052004431	0.451398731078153
ENSG00000005238	2.2438268404653	2.39840642167035	2.34487675118915	2.18953827842969	2.3425354215112	2.23481735187065	2.25770244936104	1.46561345523555	1.91886738480086	1.97082858696686	2.08114637786238	1.38619206347471	1.98385630323647	1.56578386470073	4.71809757973607	4.49145817713617	5.12149671641885	4.99149450175011	5.57872711048048	4.75076673834318	4.69926830888879	3.36636891781636	3.10791377148146	2.27690126043455	4.09878772760828	3.83490696202664	2.23675349640056	2.43564795409793	0.12916195652326	0.362352341961105	2.98985544376164e-08	0.0104045015546796
ENSG00000005243	-1.92797698932394	-2.10222985661937	-2.05748797042959	-1.54514212530056	-4.69296780839172	-5.25623275673493	-3.28123532957326	-2.61780106880095	-1.07077898082598	-1.22595410961864	-4.95478991221844	-3.77516120603493	-2.31838727104528	-4.84154235795168	8.65558759372988	8.74095713462255	8.67923973538898	8.96250296144552	8.18843513990338	8.75009970299207	8.84762870005371	3.09369380190634	2.34573825207818	3.76844568739656	8.25997820007851	8.26603863991892	2.61604252218393	1.83438265108679	0.739699270139176	0.455018115136757	4.43102774614319e-13	0.162599934986979
ENSG00000005249	3.89856978981696	3.30987626493519	3.82795609088268	3.38651101601321	3.99067470225713	3.55500884830256	4.25982583636023	4.07827074451242	3.85150022607254	3.97210883389415	4.23500668365001	3.68443555355185	4.04222276333819	3.90160294827449	0.742279148101653	-0.237602548414253	0.889896814335095	-0.336640036793876	1.7477951273253	-0.148419558686272	-0.850793868495622	-7.03304379444356	-4.84206758816857	-6.77100765633055	1.44528881786314	1.21553524334226	-2.99867791875297	-3.40071708780302	0.402545971838145	0.676745692300252	0.00137273260887545	0.238510564502635
ENSG00000005302	2.44758429929988	2.47483225617737	2.3428560289176	2.26859102006501	2.35222388853678	2.28566287616849	2.34235889426193	2.35103229875983	2.34697141464991	3.11474483814825	2.42958488100517	2.08230080329399	2.73109498460452	2.45541592921598	3.75496434184872	3.68274835241704	3.22312107714051	3.52114513367789	3.36595433712471	3.57956756518855	3.81461863433427	6.81285446405078	5.71632584701936	5.59369431711615	3.65189183786648	3.69212661883847	4.03129225768648	4.81014845142427	0.94045858029252	0.933106664822556	0.0157784029785304	0.916644893073438
ENSG00000005339	4.91447833155999	4.51187999522644	4.18386503450067	4.00381432633788	4.09251343508183	3.75875510765898	4.11653256027587	3.43279265533475	3.16284638663884	3.01662755559132	4.36020146223848	4.30261497621609	5.0032588816757	4.51213905769533	4.45069468995434	4.72418473283266	4.3529934472748	4.27380620232945	4.604961018355	4.62711631361966	3.98210419889493	4.25335324760619	3.80510067434851	4.18943011090768	4.69966524866843	4.53802999687013	4.18703342768615	4.43166755716385	0.699947063560486	0.882574972912625	0.886019532944101	0.783844585826218
ENSG00000005379	0.401453859066944	0.691925023062608	0.260937190319584	0.578302222297566	0.525058204257139	1.36420764173117	0.637557333779287	1.2216111310615	0.589158152427577	2.08295287934008	1.07160808736343	1.49798222823782	0.30703248708154	0.884954847952392	-0.461006519390359	-0.083861667078398	0.319025418929247	-1.06101867443847	0.504735693946406	-0.208184764486598	-0.257845806436749	1.28683553286953	1.25539868424466	-0.387854187456696	0.847635613048395	1.32930396292775	0.478449944375102	0.768705433778456	0.219112130490783	0.296821764092141	0.0148257638370681	0.0785816882216126
ENSG00000005436	2.86552982042447	2.99905148874006	3.11590467502515	2.96111062594978	3.01292000509338	2.75188006472096	3.19920917231764	2.93095668383443	2.71181146374141	2.59472607744062	2.63424583655661	2.8881130044997	2.63633706966961	3.39073939938118	2.54246833987277	2.35260973190956	2.47051457837158	2.1574792997284	2.50296492033142	2.25508375588306	2.27417154745846	2.70967493649388	2.48349804653537	3.13648521327059	2.494345258315	2.52857350026201	3.11819485162296	2.69250644044097	0.338030413839025	0.504750564377155	0.082270618623989	0.70114024908542
ENSG00000005448	3.19742463895999	3.79561370629525	4.38440959633584	4.3573057236644	3.81698313051599	4.50188946855251	4.43562964930478	3.98756096949065	3.96405741891815	3.98068053970828	4.1632118474424	4.0640572209032	3.8534683260082	3.97332086668891	2.67820422688228	2.39332737995375	2.98073955526198	3.00391225416789	2.52667319461072	2.49436901200332	3.25225392167494	5.03035388948796	5.05154664889678	5.59542213566312	2.55313627567094	2.73628392203423	3.91947326387837	3.64428563155017	0.922981812153711	0.967157698520188	0.0275818133301936	0.933567142300747
ENSG00000005469	-0.747046641996121	-1.02840544553943	-0.511258562771125	-0.618342605175532	-0.468660181395576	-0.168046102700549	-0.350061802865845	1.08889578146835	0.928491582670214	1.4294159922596	0.283360191311699	0.861270353698094	-0.115451397336275	0.450769012103548	2.86971276513604	2.37981657602321	2.68470635041237	2.20864412245631	2.89372986389551	2.44289140312835	2.84255590478823	1.63002190692594	1.45490615861782	1.0157709252336	2.69614631319208	2.61354086875558	2.17166826181072	2.42734053949272	0.008923606197821	0.0918733439251438	0.0537940869831053	0.913019904395134
ENSG00000005471	-3.08874680510074	-1.7516844767105	-2.99893180690301	-3.46070068414641	-2.55193356551703	-2.68213990580458	-3.32852692151115	-1.85918579192617	-1.44678778360684	-1.41893513997845	-1.52211783690581	-1.23720140655645	-3.35710300794315	-2.2147672033821	-1.27686149463892	-1.00920427401158	-4.0148267759329	-1.0379370465401	-1.42784605677247	-1.47087871197169	-4.74292850970139	2.88560435325894	2.94186857842181	0.695933766518511	2.74164935791743	2.16625376957552	1.58033986096758	1.99978078770036	0.357326894087302	0.436651293552515	2.93593377478781e-06	4.88639266999253e-05
ENSG00000005483	3.04341773623398	2.82576119354795	2.84014527379338	2.8464619828759	2.74918989083841	2.86176677905358	2.86406932643731	2.96210932107672	2.94776789802669	3.03409740748806	3.19035534715336	3.49888199911214	3.05309082375273	3.36610531399877	4.10938830994498	4.09527131637937	4.10743171603319	4.2117240043468	4.4597009400041	4.19868049898641	4.41470085699748	4.88365826215449	4.58814728910999	4.72427167998298	4.19498812787475	3.8975920415761	4.04592575833064	4.1288962320997	0.0411276348130062	0.0660635597488615	0.79720415982686	0.542587468271138
ENSG00000005486	4.08867877836402	5.320612623858	5.34404486063741	4.92289380052942	5.57513182386775	5.24439272976934	5.30964483986939	4.44695807199434	4.05403563376216	4.02761462714441	4.7603900711763	4.41105388253611	4.08546371337457	3.83476936114946	4.13595976288467	4.02919748605999	3.87188819487058	4.22674794385144	4.14067700975031	3.97455595951879	4.18034590033474	3.49932830959464	3.3247888236081	4.04334362090959	4.8427959961736	5.13313228281307	3.54263651718957	3.5818708745783	0.00117523813596225	0.146972687248985	0.35197671830153	0.0159163502162368
ENSG00000005700	3.27303998962079	3.12956848904121	3.04419753683683	2.99342534836622	3.20788988282494	2.96990672191669	3.19893890042795	3.57069124080711	3.47938260805669	3.68652276234521	3.73421850367207	3.86170297355826	3.89230767292419	3.87766430749751	5.1878306144955	4.81041398502757	5.28777782685365	4.82674802818993	4.75200389962533	4.9048470731976	5.20599237708924	4.92604141398223	4.25856752648685	4.69492435157354	4.79153474219105	4.49850188889171	4.48928172474074	4.48675096686647	0.000223769860060167	0.00590227886512161	0.00461886678287752	0.140627076458353
ENSG00000005801	4.46106124219861	4.50121635040751	4.71278120115429	4.76148459380683	4.72969150109654	4.62853118289035	4.65743250569628	4.67077054722495	4.9329130495095	5.00922693023784	4.43140952565177	4.28394622355592	4.58572240361214	4.56656424006197	2.14475225333485	1.8628378681309	2.04394222665321	2.07754658781664	1.25677662662762	1.64776558862955	1.1230439231895	3.46798873039097	3.39294392235837	2.88549762557955	2.04088426502604	1.47525517114131	3.41216847895116	3.60067961832133	0.628178998971855	0.265945542560685	0.00112758684171356	0.957472821306664
ENSG00000005810	2.45084507987024	2.011972201727	1.58674272405116	1.5851433425956	1.73831618027717	1.56698101850571	1.4923090938157	2.38974406103636	2.24239148565322	1.93206648783945	2.73922037391634	2.67208663864564	3.04477738849284	2.81562831139047	3.4063412884145	3.64013801477375	3.08807420852901	3.17238379753264	3.51250622997594	3.82792023062432	4.4134795064571	4.5864021460705	4.33411397836191	4.59763840596885	4.09066431821082	4.20947325766063	4.5777693066368	4.77569538110279	0.00282236091886671	0.0234573498623834	0.00070031033390442	0.135430859370631
ENSG00000005812	2.33405182092768	1.77093438084174	1.7618275769797	1.57799502260412	2.02876161449755	1.64465671976916	2.20195406060426	1.96170978361581	2.08970349270269	2.04211542808495	2.27185086503262	1.80658119446801	2.7233296760646	2.06191654537493	4.85181492948295	4.51261280552655	4.89417779864967	4.54359101048572	5.09950700859965	4.63402930112365	4.74178763926773	4.06417478150444	3.89164164958622	4.20567707046062	4.91378732405641	4.7036099905232	3.8757722376678	3.78012463194437	0.392576058114677	0.797494578602208	0.00996191991351446	0.848615346953124
ENSG00000005844	-3.18752249211429	-2.92127515013348	-6.28412739722883	-2.92642940167583	-4.62299508937796	-5.48535086260859	-4.89580793834953	-5.21085825932309	-5.62517809826071	-4.45462803364745	-4.14031560987196	-5.82516675927357	-4.51753793905303	-4.85806388502055	-1.87902642060407	-1.32624577666485	-0.821737252323873	-1.23493966360497	-1.44057898980794	-0.620598639124629	-1.22716329560791	7.89999572072847	7.80603774430449	7.95053975495484	-1.3235892874322	-4.40618504397263	8.96939620220336	8.40552617514277	0.632931776878593	0.790691679418472	7.19388432477265e-05	0.376846201781337
ENSG00000005882	1.78268025425352	2.57601690111984	2.17749320232636	2.54198286529799	2.09381486527291	2.45265281895287	2.58173230148074	1.86710651868671	2.15050836016677	2.16791665633417	2.41852617050576	2.02699096364046	1.68413327837592	1.87092611021222	2.64615082342171	3.07606344017197	2.78863445463941	2.24990597120384	2.47775264837217	2.35287505333238	2.97122686139551	0.257034558745229	0.154113959195008	-0.221046561226996	3.49469656655038	3.77398673711585	1.32324881099332	1.26971656461723	0.356121991457182	0.837497720361887	0.0131551923178346	0.00269234655191023
ENSG00000005884	1.73054791339766	2.53871518304027	2.0795180898356	2.60232171742683	1.98836831885263	2.80764986281729	2.06166476828427	2.97729412987376	3.33785414871214	4.03181265326234	3.05039493588871	2.80308956897337	4.48995494253543	3.1253327686969	3.47118256011725	3.43878784837111	3.87724978215189	3.30789199401582	6.61084100976159	4.14085651101997	7.36192564835659	0.237293951753109	-0.238943963068007	0.288270347539628	4.52054026770094	3.21816568351558	0.927927581393265	0.833604804255602	0.239686662011631	0.688505074071067	0.00110780393437049	0.599209572865434
ENSG00000005889	3.08082075451029	2.804936005228	2.08458101456974	2.11447678430666	2.22337576408427	1.82759366506518	2.25146027695842	1.84215742923667	1.50279239592415	1.85253773254332	2.15243714740792	2.14055881395752	2.69007771438978	2.54508480893902	4.14348026678386	3.68926337067325	3.80592512412875	3.14822073055637	3.72536414824671	4.01762938429021	3.43470955396663	3.4142705442981	2.51921010457213	3.28125878020382	3.50605821953879	3.5010208917203	3.15455842706087	3.43782762858525	0.55794877393794	0.792063381879488	0.0833963894437468	0.670561164868994
ENSG00000005893	3.03340551458765	3.26900072093739	3.19401029557207	2.88578966572969	3.16186967026607	3.2310304145903	3.08912995641064	4.38921592734069	3.95171465638121	4.2353709948284	3.91817326061457	4.03289097487673	3.66474712537987	3.82209761467176	5.73077139890205	5.79332152976058	5.63090270964397	5.43159746341904	5.63599023742821	5.67246881126274	5.7400027974471	5.32695523424123	4.99149849489348	5.33332212541597	6.73414557922594	6.62071690317762	4.55950560623372	4.76171075101283	3.08431110901328e-05	0.00303345078004276	0.192754994699541	5.12424238643505e-05
ENSG00000005955	3.45846294828463	3.70567829946134	3.67549375260202	3.70916902381436	3.68017041682385	3.66425877599482	3.69705074768544	3.38710813589383	3.71050319585906	3.45515441278459	3.3272837480696	3.35626323513183	3.19498099311977	3.32938223234873	4.48216773965164	4.50158934082879	4.35844752308831	4.41938928644161	4.55121383628456	4.35894163352916	4.40514609486884	4.45307638064856	4.39670914183871	3.73062586950201	4.25816695413214	4.17329206894858	3.97726601812774	4.0765572243937	0.0458807757399111	0.171854833266425	0.0277868291572484	0.327944180157301
ENSG00000005961	0.498184312976506	0.761563430328484	0.398302448469023	0.705691837622054	0.375041119985802	1.24444342311527	0.886348254184513	1.93840028784498	1.91818352411807	2.45846580160463	1.79160835703917	2.15056722465101	0.228175413004026	1.06954040866028	-2.8950964183718	-2.86660323226524	-1.91483548321677	-5.05176720643441	-4.75394044912022	-3.44704078360299	-3.42870904335891	-0.84148295201317	-1.60202106158458	-5.42021252714103	-2.714924402959	-1.693249370745	-4.28130550745969	-2.31725792390424	0.0286994693767358	0.0556889571703826	0.335438561019206	0.502934525162225
ENSG00000006007	4.85038019827483	5.43292245577362	5.32028904185407	5.42899156244601	5.32905812985613	5.23489057573991	5.31351672427145	5.27562056685778	5.42052328270732	5.36410595764995	5.34142322632786	5.34370522059887	5.1130427918676	5.22515788804777	5.51259655003292	5.76148941318308	5.48246861558075	5.36345817169281	5.36697229772887	5.5067678533822	6.00214699886356	4.49948060835228	4.28417522904539	4.01690533127413	5.92311524861657	6.08281949356607	4.66197746429363	4.63531607446698	0.843751421585952	0.83741639419045	0.00960215063125835	0.0656189402983872
ENSG00000006015	6.82389549695036	7.20804410961524	7.45407906477942	7.56250819289166	7.38202054742758	6.56019489572332	7.38433387500744	6.07869883730762	6.32927187910483	6.12594711895796	5.70012510367325	5.83541523534545	5.3797914334763	6.03201467293917	4.90072818168088	5.24486402658533	5.14150186605728	5.35488702013763	4.79646875282041	4.92185904430072	5.20405809649216	5.07626523874423	5.52789433930977	5.75865025257317	5.22164295532118	5.56067111593406	5.43191357047987	5.58312190131229	1.10715453360772e-06	0.000237022663442343	0.157502032661366	0.541558319149593
ENSG00000006016	3.00706302713195	2.2201500457062	2.1128126603125	3.02479178194301	2.26920004529372	3.52993309381926	2.93526720229581	3.07431173192901	3.88898112427257	4.19392842693035	3.0443751455446	1.30429247015614	2.02337583718505	2.91507858628436	7.22435503734107	6.56052190932071	8.17975189918306	8.48314408008614	6.2461962211514	9.31496211914008	7.65230726502717	-4.77200147917838	-3.50179364612427	-6.79574138501525	4.10033772766072	4.32118863983323	-1.83031157353539	-1.86788850671971	0.934650462838853	0.772715554853935	7.47802796088164e-08	0.0010304102113934
ENSG00000006025	2.15131526209754	2.06820972724268	2.14932253248448	2.47837211091895	2.34996354434189	2.65262810507816	2.45300281661828	2.45795072020327	2.48365183770986	2.39967600774817	2.05004327123593	1.9440544391301	1.77868123432077	1.93085410754076	1.42097646458219	1.65984671635903	1.12376137449408	1.79605297676899	1.36430891783119	1.444760470986	1.75116241934755	3.50059330498673	3.52242038564602	3.70022484707374	1.59873123108176	1.74373894275276	3.00892527883626	3.1251617029284	0.295321043133651	0.370814738079421	0.000101263001406682	0.77843641348206
ENSG00000006042	5.001667168481	5.51291807290558	5.37679298043599	5.19620806551309	5.22363101067248	5.35415188533425	5.64817571480533	4.71348628566317	4.72793433550468	4.77604966592096	4.91194489856239	4.82351451716227	4.9649371640511	4.22635456018109	5.34462181433291	5.82127976340734	6.03183174690406	5.39898869774491	5.56097807702894	5.34702673564365	5.67702189078467	-3.49802834201952	-5.18741978349817	-4.9462322553248	6.19344449297693	6.74168739583021	-2.96089328633445	-1.51477536886679	0.0248415774477734	0.263903815516259	2.35925510452789e-12	0.005344112959738
ENSG00000006062	1.62993287102177	1.12750017551424	1.28683334997825	1.06899631794427	1.41055219390494	1.33315380908262	1.04821430087771	1.75040972245978	1.52191645287084	2.35512008186592	1.76151002804394	1.54169973212447	2.4825268252961	1.40533519106828	1.79484614045285	1.61124586873647	2.698168137775	1.85637181033745	1.73398103688319	1.81911675727273	2.26138690002687	4.37367098198246	4.19836904422636	4.53825936866572	1.48809944707348	1.7129051467661	3.81082197017418	3.97514694999876	0.0802377422329985	0.467212375499823	0.000499145196523837	0.526715835204735
ENSG00000006071	-0.316162906368746	-0.362491383831478	0.136630740804167	-0.0851055847807762	-0.794060483328204	-0.276502138464126	-1.01675699932919	-3.38189426369848	-3.02865444285324	-2.26352890097632	-2.73876421418043	-1.81628058540442	-3.00876212717926	-2.84862521653494	-4.92922092064685	-4.83046650303211	-3.78935415890013	-4.77944982729963	-4.50543330807482	-5.81570346119682	-4.79266914091887	-5.53816387351441	-5.62170559694596	-4.19644357244939	-5.21931625195168	-5.16423714074377	-3.632507509328	-4.56715557458356	2.48780510901872e-06	0.00415783101277793	0.742900597263972	0.725816766090412
ENSG00000006114	2.21085781906129	1.96853773994101	1.82014749027692	1.32769462848037	1.62442110318394	1.39587462491105	1.76425634231579	2.50665248093074	2.37153644918696	2.0936119633352	2.86023786956955	2.90970739145997	2.95822697693785	3.23858738296054	2.40095394076822	2.45421642152896	2.21571007870772	2.02201447447253	2.36560873322887	2.30951008025361	2.12691738644399	4.20828103282102	3.85497707077214	3.7247279819958	2.70393482757602	2.74241902267422	3.86529228852244	3.94307173877661	2.09568916213682e-05	0.000533214315017342	3.8816445155364e-06	0.18859355685128
ENSG00000006118	4.70811561485378	4.89335518987064	4.95838888933793	4.60120595489929	4.92536408093498	5.00164641033824	4.99869956489038	4.11664721182187	4.05593917240903	4.09751581082207	4.28327162191658	4.29589549783839	4.20822122930652	4.23756145012258	3.9052954638826	4.34877281618379	3.28872461778791	2.98673518095229	4.09350091109788	3.74479759076717	3.13428803780367	0.325658895797756	2.20864406215777	2.38294367855381	2.50522662464342	3.20800226993781	1.46468029433204	1.67606437361817	0.0143039457200574	0.184337855734631	3.15369708382114e-05	0.135797766514831
ENSG00000006125	5.89850724091517	5.86374424399213	5.75538615306369	5.94468179713934	5.95161434128378	6.03311451489262	5.97832969050862	6.16550345819123	6.2194131707745	6.29808128364398	6.37152465239064	6.33103294099677	6.33395448797657	6.00711599861591	6.21029944843328	6.19977986264473	6.44332318889423	6.17688060162231	6.13877393295412	6.28587385452065	6.36210863871782	5.43368943239114	5.46656687531063	5.73396018682519	6.42543510494253	6.29770327141743	5.46844829585957	5.50868558422301	0.000341546121829328	0.00382081823578286	0.000562649854814275	0.555994893425744
ENSG00000006128	-0.943209530324381	-1.02937258155802	-1.02907678416341	-2.6685425696948	-0.769494488912652	-2.49096769876695	-1.28379443432321	0.699876940998392	0.498148650108367	2.31837931108439	0.815554353403825	0.551481569147682	3.92137869080423	1.35251495519525	-1.7707888358969	-3.26705939141565	-2.24117860824355	-3.20248709141412	-2.92634542931666	-2.67484808492586	-3.20885387581246	-4.03838126949931	-4.12678305478079	-2.76566635320446	-1.32405580411219	-0.772767128954063	-2.10838642100619	-0.709803523192586	0.00224291602526379	0.0921796677042558	0.433563134477748	0.351136203035595
ENSG00000006194	4.14649716960435	4.20126472082559	4.24411318838441	4.14810537476651	4.22074169432172	4.03386718356745	4.14706342294361	3.95307226268327	4.31990422283849	3.96742502919378	4.25284978080995	3.87693616890524	4.49554183400738	4.09032904376949	3.25086019653107	3.19873293137611	2.74032045463119	2.95879430848323	3.26462851793371	3.12075097264166	3.25523611678492	4.2522538453043	4.29932883305303	3.9598634134127	3.75303320251235	3.68364707139198	4.10434874763925	4.11905466862609	0.747092740603468	0.689519627068841	1.17040095681461e-06	0.0100234348402626
ENSG00000006282	3.23818530192284	3.18003503128358	2.97098071684584	3.27949913870464	2.96351905124453	3.35290538593877	3.18385924551063	3.18875697660845	2.92656141264143	3.21983185893558	3.07371741000464	3.31905106765245	2.90418745631917	2.88608274977698	4.95617740894569	5.08393427436743	5.0300929350735	4.50300619636965	3.97553096693995	4.46914682397659	4.79096554210954	3.46433640132225	3.48951365328564	1.86893797070689	5.02713230314726	5.4383813708093	3.66695557627721	1.40765718069441	0.909091599371871	0.971272246732534	0.0288930239848023	0.292268273692068
ENSG00000006283	0.578768943283046	0.487170740979009	0.299239524388251	0.290279609372214	0.513703011456443	0.500011444929749	0.389274460875439	-0.853988423197903	-1.03482563759273	-0.307634336040856	-0.395323288032879	-0.148894719431205	-1.43876438579459	-2.19314216818183	1.89005587542918	0.578598496635454	0.552181802985563	1.11488411410331	-2.86230925383389	1.0880419055249	-2.36246915501529	-4.1179339333187	-5.99141821339685	-8.10101573570181	-0.912406167607463	0.82524918633455	-4.90313997268314	-7.29734116687861	0.102804328233867	0.597448845104023	0.000318563407900908	0.873999896937838
ENSG00000006327	6.23410893961951	6.55388978518628	6.42090728561125	6.90951193053395	6.64376439006801	6.99369023343409	6.57639217385307	6.7012515299573	6.71962732855536	7.39150500182139	6.0798994257892	6.12686658125002	7.17140317865764	5.92157576007664	7.82680347007907	7.95846472930154	8.03823104946045	8.24750846686928	8.39158744100336	8.27452187353196	7.64801728421093	0.798431859789561	0.111213290405387	1.01862504904383	7.49805555372679	7.44389171841504	-0.374733872789169	1.2321883566516	0.502440287794061	0.199844609810658	9.27166714083019e-12	0.0998538820878124
ENSG00000006377	0.727390138445908	-0.137546446051934	0.587462396646099	0.845781534229527	-0.178561946357464	-0.403471138828898	0.118956843415502	-7.60901564719219	-4.44872286366486	-7.34540665951042	-6.9664357515991	-7.45489800849578	-3.02702575637874	-6.27831695777978	1.14364727909142	2.21515241155168	3.63647604523991	1.49283610148658	1.0606551772188	1.43251826398839	4.92222234743802	-4.21922170860887	-4.30290717549618	-2.87947221598049	-3.89825501382027	-3.84286300227489	-3.89780924459067	-3.24716700866026	1.29088163463506e-05	0.00163983646910914	5.54447453566271e-06	0.006210888667249
ENSG00000006432	2.31007117830418	1.89233236323936	1.33024348158937	0.918002493462258	1.37165742431799	0.70585321937779	1.09566649965661	1.29648497551054	1.00473607145645	0.517950559477662	2.13088743808699	1.77505830993488	2.34275514319445	2.08930890967887	-5.05745424559781	-7.44492660205846	-5.18333699542745	-4.9252160205899	-5.38980696633341	-4.97911455692729	-7.15563000857703	1.67657847232701	1.49400358902025	2.13222099860038	-2.34626074500711	-3.55455555130351	2.00062098069028	1.1374903927119	0.368948161385709	0.319804110584713	8.05222534332608e-06	0.11678360750193
ENSG00000006451	6.34098850878734	6.33250441395354	6.40167883792365	6.54301423032228	6.34560878050685	6.17836450782614	6.36554025153891	6.40502455007836	6.56332725398481	6.22257722672066	6.33753468103852	6.34606116875323	6.19512493798029	6.36903311405758	6.10929484687801	5.93625132804787	6.22947078757511	5.85809917439467	5.93714839507593	5.88146089458298	5.30607312690269	6.42198502835646	6.2232217480015	6.41497163959684	6.80862447432343	6.92930185227165	5.2857819773423	5.31435086784475	0.976589717295451	0.980563238485207	0.011520582945547	0.0049824673926261
ENSG00000006453	4.0350108201316	4.30268019600815	4.29839713274644	4.30311235408046	4.38962901122326	4.63547472927085	4.58524566827073	4.467198697411	4.24596601040358	4.81281753705409	4.71622162696149	4.78940240957804	4.12140393697841	3.93963296876556	3.41120795130635	3.55082122154483	2.61248961730465	2.85772326264884	2.60378640559683	2.89919657272904	4.07967277266037	2.46943058685445	3.38111847322271	4.94933276074601	1.16681627284337	2.57264650819277	1.20007281075269	-0.659819014342631	0.755107371796238	0.657253463026522	0.200279409676582	0.418391511477642
ENSG00000006459	2.11536220419229	2.03995439966159	1.51737384225124	1.42944777671624	2.90789394066538	1.61030347464465	1.62428955226649	1.53798539558233	1.5538056861221	0.722329904032257	1.88629406743053	2.29158489589122	1.97944892317319	2.14853608335049	0.989758989585536	1.06983401367258	1.31834794728566	0.964731265963382	1.35354229096975	1.5575394623834	1.19060815211412	-1.22319067100882	-1.57252808685781	0.704704236187594	1.17603429290656	1.01259133261182	-0.748582970094696	-1.44442895047424	0.956131542890164	0.704346483079246	0.00749068066637059	0.877899832652835
ENSG00000006468	4.53849106918049	4.38031275481068	4.45169931855251	3.86298213453055	4.09472856093945	3.77020245557034	3.80641753524204	3.77071568858013	3.54661008853568	3.28302559609057	3.7328720071554	3.64388737138374	3.85753393349235	4.34979754414774	1.34056516127137	0.929644246897866	2.87422718391511	0.905493348380561	0.94757783145847	0.315440816301253	2.38164645382763	-7.86404273369946	-5.65261707220409	-9.13426329357314	1.4306222838241	1.30778173338356	-9.05369443845209	-6.73118000241472	0.168787453680245	0.38350542673528	2.28942503777277e-07	0.924868964856441
ENSG00000006530	3.56003800285377	3.93420478016306	4.14790768906129	4.24462512070214	3.76345154359164	4.08397656001606	3.84497840284418	3.59686229707101	3.45814544816192	3.64651800013265	3.1959973493936	3.53967634517733	3.17082910963404	3.20071083135526	3.13707942049614	3.04876095152727	3.40085430721508	3.37130400415046	2.79545603020081	2.98522722508419	3.06837481523293	3.80669312934336	3.84467929102879	4.12860634669681	2.32788457744684	2.36881745549803	3.21619998471662	3.31284552559099	0.00492207481618905	0.064715693163915	0.654498557215763	0.0464758958714779
ENSG00000006534	-0.0942817090741151	-0.775111181245795	-0.107162366341801	-1.14975592237573	-0.0870863177200893	0.0341145449514237	-0.199739937065255	-2.36742547974011	-3.02226375008802	-0.606629984187736	-0.948099894391174	-1.53624493690951	-3.3777109117541	-1.51205625092295	5.26520634121745	6.12128175329355	5.85474721708385	5.61733253065722	5.18357458861137	5.45428275260834	5.6209303729333	-1.94984533353168	-1.06579292452305	-5.3406659754685	5.49578905998182	5.57447032972442	-1.4079081974032	-1.90539121949774	0.081140123960688	0.534677503029197	2.96862150699153e-11	0.904198011411906
ENSG00000006576	2.43582424531624	2.25167340751807	2.01915751603243	1.80070112943407	2.09712338356701	1.87726305064048	2.0836859556229	2.8375298323292	2.91206158503736	2.5486613354705	2.65574650228006	2.99496623184736	2.58740076020642	2.772412285265	4.35448321649304	4.29373992526772	5.18841620544758	5.0261598445622	4.96182574629082	4.21795097033145	3.83896871250375	4.21693643760123	4.07457430379789	4.18419286009508	3.97347984239773	3.95129336279093	4.28003277323257	3.72097986858252	0.00915911762209219	0.0654109936817668	0.0110748151905002	0.101524362838439
ENSG00000006607	2.07313398747581	2.16949094967451	1.83047408066578	1.60307679003589	1.98984248453419	1.68897525580053	1.62436336237943	1.52275595007847	1.70686033226625	1.2830245186076	2.14841089376411	2.11736025365892	2.01388916521614	1.96503231043738	2.84428150588552	2.85027775366898	3.07931345525754	2.74060524812347	2.7392241489511	2.92099338504342	2.60523669865419	2.29092778043547	2.29712857158339	2.46985773237727	2.92060423907602	2.92174124184952	2.15040785463619	2.01027826682022	0.755203142583427	0.325055658438621	0.0743958642947664	0.775724269087894
ENSG00000006611	-1.38492289961839	-0.384169798376953	-0.496735769033952	-0.253895224104142	-0.599212685208053	-0.0260187131105261	-0.661553120586967	-0.370981196122791	-0.396062600613651	-0.0204524211292916	-0.44208969149342	-0.889968715131968	-3.04863315874731	-1.29096897955501	-4.16210534799917	-4.06258038597295	-3.02042114953905	-4.01263879581563	-3.73882559977562	-5.04722871976904	-4.02639984385756	-4.76303643126658	-4.84618021123771	-3.41591338992365	-4.45001367972331	-4.39579624168043	-4.44432849574868	-3.79491716595174	0.526957092420535	0.89162929764953	0.64208788547535	0.79093875872135
ENSG00000006625	4.63061996977453	4.68531246705464	5.02183161388497	4.96610772276116	4.96367332861155	4.91021767481523	4.88457613578001	5.98381004616686	6.00943389522081	5.75471831580185	5.63000119498999	5.75750039241111	5.45774477024317	5.4920210524975	3.02231489645854	2.76706973912768	3.32795259825979	3.3049851660895	2.85198300163781	3.19447892963466	3.40020989661192	4.61387283030335	4.95182485240997	4.89892453477665	3.62715539737571	4.07467577015242	4.88820576436549	5.01316743391001	1.32114054417537e-06	0.000349196625146452	8.24332433756567e-07	0.0361821154980589
ENSG00000006634	3.85004166147752	3.72946077641017	3.92262143876515	4.0804131439958	4.12512079923631	3.7884791989601	3.87748403067554	4.41580790288737	4.4187545701038	4.10432647302844	4.47849437554267	4.46208458124574	4.45005179293356	4.74261188195366	1.23371866707958	0.232887644061711	0.880708633971168	1.96381121795232	1.66246231119229	1.9330313999779	0.688002606124495	4.35943406407189	4.24246181838325	4.35883150558636	1.60729685688692	1.08562978775822	4.49517078357847	4.37220034911179	0.00150518849802197	0.0246490790115939	2.99257321383218e-05	0.935733136772886
ENSG00000006652	3.696366742966	3.39693527518243	3.1446813990124	3.28170665699226	3.21819222625163	3.15623678388667	3.29638069517148	3.36088605901617	3.55754498944358	3.81267403031344	3.3563241352949	4.08400539464311	4.42714973433928	3.94281695722727	3.64057697890432	3.84792238119724	3.81702920617022	3.31624537313025	3.56586142878524	3.96148578787	4.18454878324212	3.59606395486303	3.52047141264537	3.38685520954613	4.05543869889343	3.89940101882802	2.84282644396931	2.8411941538107	0.0442842983117415	0.274727341913134	0.495701359422213	0.629383211318375
ENSG00000006695	3.88284159288142	3.61560626028704	3.75903914089646	3.75381592387384	3.6730867356413	3.59438828551409	3.90063182352334	3.67630955581274	3.75389289739358	3.6523914961405	3.68701875384813	3.67202938060281	3.75575128975219	3.66697543106693	2.88105314653752	3.28098166086313	3.263306007667	3.39442957854087	3.19314248983059	3.2868676561633	3.13635113206131	3.3117987975987	3.3417781497589	3.50771297137007	2.83183149072373	2.64189528969372	3.6898572987672	3.56999216865606	0.726551178836764	0.813615055668065	0.400081473556633	0.042446150902665
ENSG00000006704	4.07512418993587	4.52485130489698	4.34881550662495	4.43326524485891	4.60582304165849	4.50820400587751	4.52613686391393	4.73292252207059	4.56737040769026	4.6903761084808	4.57839743463135	4.56812342052038	3.85999342522572	4.11314759381232	2.79221009228406	2.78526064199283	1.59194236138783	2.02866271681958	2.69514656796393	2.85701135910576	3.59870681547053	2.83898381169304	2.97339452512934	4.10681627660235	2.62733514000626	2.78913614676969	0.873389930398238	0.922787255743644	0.91587176043406	0.860633774301028	0.959398810694378	0.955618527844095
ENSG00000006712	5.24712672615283	5.17347485039395	5.2251240581222	5.02973868033255	5.0992442964252	5.11110355668528	5.0009519818204	4.75564464520878	4.6157753667495	4.61261037639627	5.08432916348527	4.747442656571	5.44534290195778	5.30335784119443	5.70301027734248	5.60324051111614	6.06266584505983	5.9188737383072	5.60525874855365	5.66622835971664	5.78511374365374	5.66129089977135	5.64671265529535	5.62568786633566	5.71767441404103	5.67261437348798	5.8515299862026	5.75428861670663	0.252774960224476	0.468012244926589	0.698771275266143	0.857918706750378
ENSG00000006715	4.27666055131311	4.5657999249572	3.75930347461291	3.64158354703507	4.2011030172636	3.77888473014887	4.29304277948389	3.18843071481127	3.28233029655343	3.01359619349419	3.6927626574803	3.69931105397058	3.95361907356358	3.82510494400412	5.31779829538438	5.49513761679645	5.11885507519766	4.55303004728951	5.08259450873565	4.766855711131	5.1753721689464	4.58790554850549	4.42709041282115	4.14507420872767	4.62489843688468	4.53036726293439	4.67138552220863	4.51452748661713	0.0350201423635315	0.357811026075122	0.00764183616225169	0.178894927637958
ENSG00000006740	2.93897046581701	3.12036996557279	2.9410267105882	3.01861089300857	3.01406046278323	2.94785480822998	2.96505890471885	3.29231522566824	3.3863272451131	3.37158545318547	3.37932152943653	3.52968516357388	3.04709026494799	2.99523188942302	-2.20052048129702	-2.35362703258244	-0.904680753800631	-0.620743940938313	-0.309729837255419	-2.07106524451556	-2.1561962195368	-2.30494898829266	-0.937357064303232	1.40705946582747	-0.580729354908395	-0.249733421074241	1.23871907972845	-0.442411215982045	0.213708257850458	0.297274786929931	0.0947540726632341	0.406247160637556
ENSG00000006744	5.22181368162903	5.18310268445213	5.14553233882802	5.27218558211132	5.30923969705423	5.25834877060299	5.13753772336319	6.39948410444616	6.4567675542979	6.43987715889926	6.33201779088339	6.18780797890145	6.57545811359048	6.60914168236938	4.77292442728484	4.60607646400518	4.65027191393266	5.05183059738563	5.10318000786071	4.86116553993035	4.57576866435596	5.29862126857313	5.32063818761723	5.56734391664037	5.12329328874208	5.33193870105261	6.39607195520646	6.26975060116653	9.19030204639572e-07	0.000739824806398094	0.000691071177646956	0.219178844474714
ENSG00000006747	2.36518991923794	-1.85689347024139	-1.80494458398216	-2.99003713504564	3.26878757552645	-2.27282028530007	-2.64242078114878	-1.47259695925676	-2.73778880444208	-1.89263508700715	-1.31918635998402	-2.60513558416175	-2.30493155486066	-4.05426415387051	5.96793657401356	0.315092745936473	3.63077901860603	1.90686933973361	6.58614096760891	-1.52880243277061	-0.574359126471382	-0.223565636769401	-0.0978295528596687	-5.68535806382012	-1.37847146934124	-2.67526420541905	-0.987582878674272	1.33070504695059	0.714595302513956	0.881149952860123	0.130129385642326	0.484961748712238
ENSG00000006757	0.823655853978825	0.0769357576882388	0.999274574528136	0.632326188677363	0.563367419075804	0.674123700506395	1.20760922405232	2.80969181279966	2.37493903719187	3.95043505871861	2.35236558948626	2.52528799450138	2.16220516097118	2.49219817101772	-1.07855114285731	-0.780532994262179	0.0837536744108558	-0.739826022338126	-0.783982677229081	-1.11792038476848	1.20595332826942	2.32763667470903	1.56165693364363	1.7380809214043	1.94985839928836	2.2116068069274	1.51887348372779	2.11989628280565	3.95075873038167e-05	0.0028073381893968	1.59801593502187e-05	0.00064935839369395
ENSG00000006831	4.6755381424093	4.18284813808808	4.21646905615891	4.20187306165839	4.18251536673534	4.20614493339835	4.22461461796192	4.21519495062986	4.21694423134221	4.19264069043178	4.44754757593189	4.34722677242417	4.59901540785331	4.3199926935046	4.64969071083191	4.80889370896371	4.94312064063891	4.63315356363058	5.06021959342889	4.50895265146105	4.57857761263466	5.30435759576555	5.18890079530514	5.61996302215432	4.91835197864409	4.97684708793474	5.17242542017434	5.0956203987901	0.607189191656846	0.6547818737956	0.0039328323142709	0.383571588672507
ENSG00000006837	2.58456930337611	2.6242611829765	2.62711292963931	2.65252337320166	2.54278882589449	2.39062392978831	2.53144098446767	3.64627790537834	3.42294212028141	3.37606002089594	3.73278908240241	3.50484113547471	3.73621619596183	3.63436296413823	1.98899980576427	2.07223542987764	1.76762420831492	2.01394269526968	2.1980064173464	2.03982115452546	1.93467457218112	3.26266599888462	3.19713858275727	3.05668348809671	2.86082704906838	3.10411904866127	3.63572284344454	3.33821692380044	2.47261168931117e-08	6.64732801172676e-06	2.519271367038e-08	0.0001897939242565
ENSG00000007047	4.12950621787872	4.42489820276279	4.40597672746151	4.47354706996423	4.35920876102813	4.7033985967854	4.39414078576699	4.48032596940342	4.52647914450311	4.56215720361924	4.36798917722159	4.25236324890725	3.2534721180264	3.72089293838992	3.84481836441642	3.98832390756565	3.5526518950859	3.66559869807644	4.10422583409405	3.67319966570912	3.77286892849135	3.88696043166457	3.77780039322691	4.00734881425661	3.7824794669897	3.88547197333973	2.50662342653847	2.7064473687294	0.504972239433021	0.870478177511752	0.575125755309075	0.954771022477298
ENSG00000007062	6.75157950939292	6.4901965526454	6.19458559601532	6.43321610577384	6.33745714832279	5.99168425751341	6.46244576927371	4.20765706970573	4.31984385455177	3.58664035151603	4.61770490157998	4.23889049192239	5.2802722738764	4.3134570441178	-7.17189556850616	-7.22365111425606	-6.45249946523259	-5.44468933188729	-3.27741820316498	-8.2421994819262	-5.35462910431948	-5.79271148674973	-7.15745614716691	-8.24903413151426	-7.44033814155972	-7.26779976247569	-6.43629754633968	-7.27036558842534	6.0297024414996e-09	9.90988045100359e-06	0.407844412206007	0.636681322886889
ENSG00000007080	5.66181848790017	6.31935519131213	6.16573778352935	6.18300000505515	6.35879018427619	6.5278238257535	5.9826857106847	7.25299658917218	7.54850632519672	7.7892931161884	6.8277215808217	7.12063907861927	6.61995534973324	7.00408190634537	6.48196634984383	6.70421114065534	6.55353334139421	6.92937950610979	6.73474867523863	6.89253584720031	6.72673607573328	6.1894099827787	6.4783610211249	6.30330515799073	6.33340442384625	6.62060014538435	6.74119224549851	6.88886983068814	0.000112433770917392	0.0179757623928483	0.24887500054047	0.555994893425744
ENSG00000007168	4.90210955459763	5.01624501716014	4.8524127323708	4.74810497673115	4.88862970926157	4.75246086035011	4.83612031014119	4.45363108910789	4.18807696868084	4.50777823328798	4.74720796046428	4.64695930188828	4.84900301028033	4.64683937425336	6.03281486697701	5.90251033498267	6.01071738247289	5.73469232627748	6.05591979773213	5.93957844365208	6.07695142097408	4.94434064476753	4.86033496531084	4.81979986805048	6.08535538548485	5.85726983834262	5.26529673622082	5.06251150933757	0.0553508324877817	0.484871911693515	6.96476573886861e-05	0.971937982794925
ENSG00000007202	5.65102077366289	5.68477738710726	5.41683593379058	5.25444556881208	5.35036895357006	5.2404154735329	5.40105443425603	5.00652645226228	4.95365350726179	4.6634894230253	5.43149495488957	5.2266118346033	5.49554710805482	5.84495572704591	5.60659153320148	5.58743246066064	5.5529071525953	5.54842203548107	5.63677417810019	5.74597435036938	5.65514649775122	5.10219214634154	4.99843815749841	5.57607988116075	5.9161571224029	5.71136647018008	5.91335545913403	5.88937082784198	0.464856965875533	0.830149582239957	0.89388778829174	0.633041964959597
ENSG00000007237	0.686521371995156	0.918791137481142	0.900573334926415	1.08385820179984	1.22460663650761	1.16486667533602	1.12147681237419	1.36080166361866	1.23151522424699	2.43372099722303	1.90293977520766	1.41320792056965	0.649846863742988	0.408652627419712	2.03687545234185	1.97209695368015	0.109281156273853	3.31707250477818	-2.12855798512501	3.12449168267575	0.877148728477663	4.1891225243908	3.40737580259029	3.56238531543851	2.71987328340377	2.89802847904057	3.14995726246938	1.88727269704466	0.644988964278732	0.670438225271401	0.0190574092057781	0.250979193206162
ENSG00000007264	3.58197863407598	2.71697886566574	4.20744776930929	3.65618700514535	3.40982650986118	3.08151770936588	3.68277292610474	3.77138044182438	3.62447664428621	2.12072779418894	2.73689135177367	3.80792217603406	3.1670630209441	4.01349138659205	-1.92500707357462	-1.88584929918144	-0.931705423844212	-1.76158735039715	-1.47163865785975	-1.34790933844746	-1.73302184143753	2.71348383893521	3.11430624803156	4.61272485175605	0.0968660522095208	1.06113946358533	2.00957577030913	3.70155798195882	0.834836911707912	0.898419854613668	4.06651799470362e-05	0.116391499926563
ENSG00000007312	-0.72362661671266	-0.429103295693565	-0.288295014351841	0.739321630649177	-0.313562612819401	0.100663698772789	0.117235878046282	1.5557047615777	1.71124162834289	2.20698733743057	1.57015420409195	-0.302814505942009	-0.456631462965286	0.664826182884448	-1.60710128792875	-3.92920595129524	0.736037761189444	-0.302541525394938	-1.11687731416469	-0.634283617138511	-1.37361330410676	8.91299214128979	8.58997539434811	8.79142368617917	-1.07274215883799	-0.912196669493922	8.35139514640295	9.04969882997632	0.210474740041219	0.626065957897339	5.34719336618513e-07	0.937462439247863
ENSG00000007314	-2.68622507927387	-2.2834639106194	-2.61478588034799	-1.6513662643478	-1.88774492226693	-2.26826403507196	-2.84313972629168	-0.334503204914262	-0.0562750712139881	-0.703570417103796	0.74153630146923	0.653646651020223	0.481579078534785	1.09275838902652	-4.49314986712829	-4.41411240102819	-3.40428704041396	-4.33713762029006	-4.05937402103948	-5.41435092179183	-4.33710985274702	-1.15662655205051	-0.693072375843925	0.608651327276623	-4.78390586674745	-4.70818084503472	-0.233790088777682	-1.88352954487779	4.80802431945046e-06	4.34044181877514e-05	0.0089723813072104	0.79613298155617
ENSG00000007341	1.37028535332326	1.61099387462638	1.54693374203725	1.19601992769971	1.4400174893432	1.19024037248888	1.55065456029702	1.0196884026749	1.25965576251935	1.0938023302812	0.832548247848525	1.25385509588969	1.25262909408596	1.06929500647476	2.76469560538233	2.78911608090843	2.65008368279491	2.42574725838218	2.41159568362091	2.47027861256421	2.76726675611731	0.234884932956977	0.570181694015701	0.0921447881084352	1.79849494710973	1.71835608008384	0.801740939026111	0.370853220796448	0.0669685986600834	0.223786866441821	5.74114982134936e-11	0.000944049748848936
ENSG00000007376	3.69312213512992	3.30461287243545	3.84318143308884	3.5492522865262	2.89512131333922	3.62244436569796	3.4096799944896	4.10533036646521	4.03330425113671	3.45394322184578	4.35423145135719	3.61163817235884	4.56718410910523	4.61024056361956	3.3146503573107	3.04500699981015	2.79145390803789	3.5694269907623	3.18912864966007	3.39168747009834	3.07827415954518	3.82352715622104	4.15445887171304	2.26786578432301	3.54035702615428	3.78169520605432	5.09651701806391	4.98178200388878	0.267448472145162	0.620801533109479	0.26556319550896	0.713866311473372
ENSG00000007384	2.37602454736357	2.24652606590482	2.37438060480412	3.00716304528588	2.29142009298562	3.37042279521464	2.77887639541993	4.13848111750014	4.27575228750207	4.61770728785868	3.56547713210381	3.42952509295097	3.75319830021804	3.41238687588438	4.80530376217546	4.91121190923665	4.79532241121698	4.99797554309188	3.998945300309	4.58499897366515	4.67581108087858	-1.0842570062307	-2.29745561826937	-3.2853752314337	4.48103220980509	4.79468722481973	-0.385730994555061	-2.34855849973986	0.00038992598493815	0.061861562621612	2.25005178277499e-09	0.929841616077779
ENSG00000007392	5.06616897042062	4.69181926576594	4.79214293896938	4.9856723621845	5.00310953965103	5.07840683808259	4.84397349832646	5.02700291362389	5.13642236870147	5.19018577966921	4.88028465260068	4.85242651021301	4.58521363632236	4.9479881517819	4.15409524612602	4.11838117545917	4.17582161181829	4.01514966321146	3.92048011199481	4.2114156725839	4.36384702904066	3.8918216396592	3.93840844036003	4.38863594057582	4.14035134971528	4.2945844778203	4.25166590547195	4.33709789609423	0.988697847034451	0.853933391304073	0.765369985346993	0.812619227293065
ENSG00000007402	3.73048164670315	4.11413509728144	3.66882798916008	4.06063395315359	3.82814158344968	4.16987115101867	3.99761432268613	3.06107667908714	2.82389070032506	3.74987135890623	3.1738329186599	3.30740370401383	1.97918791248874	2.48574879940818	-2.76267970980048	-2.78602130804356	-7.38660982793526	-2.03212507080393	-3.17024759341993	-2.70068665201261	-1.4187290411864	-1.44125842791242	-1.74158760963132	-2.82011818961878	-2.97179423148917	-2.93498207624237	-4.07240675427108	-3.50542511430497	0.00141027067206828	0.117131455486523	0.754682501674379	0.940505815469869
ENSG00000007516	1.25708269491714	2.35893780877048	1.62771349065269	1.59932899564403	1.02959355697764	1.91514588911797	1.90432367747246	1.21280553885292	1.70009974476784	1.96628326335439	1.51947592258971	1.18323537843961	0.840470566135811	1.27922179585577	-3.90378585643735	-3.89978016187238	-4.51903359284058	-2.15116489466083	-3.4154427933475	-3.77490139047324	-5.25845373647212	-0.0961571834943287	0.904341526859445	1.4654575635547	-2.10428388437712	-2.18831483116219	0.115520281599251	-0.527637575500149	0.352554752629924	0.597692993296687	0.000121130987130353	0.197014653370891
ENSG00000007520	5.25325856103205	5.45940668817528	5.47264066517909	5.29819906007704	5.58466961832697	5.71056089472714	5.37948133642067	6.11975815140554	6.23373545174278	6.18673792533154	5.98932859606201	5.80962067272845	5.86966211694463	6.05105742679319	5.22457197935917	5.29469232926456	4.50530762813817	5.44476976110057	5.22829637441393	5.21449896638783	5.32290555971082	5.68331505539257	5.91271868521086	5.73029264207741	5.99912304078421	6.34340508146179	5.92926331118631	6.14668711718573	0.000966097486565879	0.0690847100730358	4.10045215840257e-06	0.000203363269300954
ENSG00000007541	4.72635594418328	4.97708506257051	4.89047438609154	4.75742534851767	4.51317209665378	4.91602008031114	4.8134361538255	3.361929275569	3.05566870220676	3.49686012884917	3.69596213965898	3.13528601348172	4.03456483684104	3.94793770143637	3.41181236233019	3.66197040315606	3.53154458992729	3.67336316399735	3.25676242013503	3.70334401376553	3.59656942240307	2.34505244537319	2.36711849776171	3.93204459043281	3.90263133924392	4.11498939579265	3.08406382287618	3.3007716062049	1.10675841195127e-05	0.00155610847434073	0.765107074931299	0.357231638978177
ENSG00000007545	2.88536056128287	2.58972433201598	2.46353523787441	1.9900722381992	2.24789886100522	2.77675150641676	2.67866418169064	2.37304538510519	2.02255686251834	2.22502797478989	2.98407232465281	2.85443676852062	2.89538207864055	2.67173840470687	2.41566944185342	2.4753997378013	2.10874228192509	2.21773873220453	2.16071843859925	2.26659689089823	1.94089629514081	1.16156635579978	1.04625289431923	2.52782772190205	2.49528339754266	2.57363352596165	1.94827237934284	2.15458019821908	0.596000544746216	0.362818529917509	0.686230881240125	0.57610889145861
ENSG00000007866	4.6681317237067	4.95717155134542	4.99567098902133	5.11863955771707	4.98573825207799	5.50317236172216	5.0425100257415	4.66462216900679	4.96762069182477	4.98726382693705	4.74520759141439	4.88463396660796	5.52027989286077	4.39049890594278	5.21420733189603	5.4525513067987	5.16029374111351	5.48018453813583	6.24266237196277	5.75013358147754	4.26580238618586	-3.64748483978762	-5.03359124253792	-7.43208141150357	4.78623837365825	4.95503599306499	-3.64059890244778	-2.89933755655804	0.597006742809036	0.713085181757144	1.62342740801349e-09	0.331124289826576
ENSG00000007923	5.37647660820435	5.39155243838018	5.47284479352005	5.37062487481584	5.42647545943692	5.42099594907022	5.45418494645181	5.1641613652288	5.03661916491305	4.96354844261641	4.99714901713087	4.94704462028434	5.40265709559482	5.25150998659265	4.18574018188526	4.21155157072235	3.50789865122822	4.42192257266042	4.26399259486461	4.40862538076305	4.04793258676142	3.97580443422171	4.14541378132773	3.95540234658662	4.12597112324366	4.23671759878993	4.87799081328674	4.8909790879602	0.0607695031935387	0.140827517749088	0.624793352028816	0.971906202710067
ENSG00000007944	3.48786221469443	3.71358822421756	3.40176582790388	3.21000163074046	2.93097376696241	3.33401139873506	3.4028187473993	4.2400474654352	4.53520875529737	4.48933298060426	4.53660716224285	4.39906313867145	3.19840118380481	3.94631559754656	2.27416771106118	3.12556867489145	1.70759074473191	1.89319384757094	1.97471255191617	1.57198820022944	2.28141015105866	3.76681493430495	3.47190515493879	4.83189825162904	4.12540205680751	4.03650349200618	2.67033408809538	1.57962467977407	0.0291754973031718	0.0790075705468414	0.00130676714795283	0.00843314726927401
ENSG00000007968	1.63171852230458	1.63372337848927	1.12149105701757	1.11198462407942	1.04531745832501	0.560971060687745	0.83881899118972	-0.114672778526017	-0.275501642419591	-0.807018404100523	0.873853192354053	1.01304666896204	0.146909783076749	0.0278610120887084	-1.31275651226353	-1.3045651013503	-3.50974907309125	-0.0668265839980863	-0.537796489794587	-0.0159226196900112	-0.55570610958872	2.07706472051414	2.84665203456948	4.20522587990973	-1.6258664953612	-2.32094749039608	4.61779699279257	4.81204907359912	0.472988527123597	0.936670587896837	0.140646757561131	0.749184887450104
ENSG00000008018	6.92052055514537	6.92612345550108	7.17713079598419	7.29723493241898	7.04227911584415	7.19161394333125	7.08881590113055	7.22675429550576	7.33269088801829	7.1808112803574	6.87082941740836	7.03312870322001	6.94289131577821	7.13300727045835	6.63628178415801	6.46982562762482	6.96967674736626	6.75320258376577	6.68364506114582	6.56266320924988	6.79154785839587	6.87865017630412	7.04887619179731	6.84143830935564	6.56507893149188	6.71513402368324	7.28538519888956	7.10588037904695	0.818104484370988	0.531730924150731	0.202036707286762	0.846382068725938
ENSG00000008056	2.07041876087514	1.48062965864813	2.90026932577228	2.63162073282041	1.97406679009929	1.45267434250672	2.49165277896496	1.91488602793289	1.75015415691178	1.05295739302782	2.6981000379272	1.43866106992085	2.79775979411846	3.04497263553267	0.546390346675439	0.62409793697613	-0.690280668822703	1.18815893086901	-1.34121706745483	0.470757777937536	-1.61829179899242	-0.950773963325549	0.830243837276151	-1.33541724775399	-2.06640019226829	-1.98934578921136	-2.16649253518635	-1.49283785812956	0.94045858029252	0.939057979697062	0.0475299154142554	0.130764093450495
ENSG00000008083	6.9073284367277	6.90030675620479	6.9722618160499	6.79601036416916	6.96017757574315	6.98146365756004	7.03002854140516	7.03732335507598	6.79272061229582	7.45737661265771	6.699225128722	6.78292573636542	6.7857402840172	6.69473920861074	2.03189329570106	2.16177654402999	1.29558429877547	1.50869294365827	1.64543571432262	1.3823149115002	1.95297505886824	3.54216828421722	3.75862836391896	4.00408620140573	2.35577871759092	2.19858063240274	3.86553435539306	3.47615239983692	0.573930775846953	0.435426619674125	9.70253120251238e-07	0.122867420098207
ENSG00000008086	2.15138521251192	0.925003469615736	0.434418331533028	-0.0802752009404792	0.434129919638232	-0.319177829904582	0.44273230986546	-0.117189540164579	-0.51609151952694	-0.0702933325708406	1.13050374402368	0.737493452032718	1.77297767681985	1.63243567311674	0.209398042188404	0.343160995285603	-5.28189219035448	-1.42005134469115	1.56580202382219	0.322562313220331	-1.46389272680998	-0.662653832075456	-0.670996377716662	2.68312903519949	0.954041445808832	-0.0538085601216902	0.829656700887949	-0.385375205859636	0.870750517740748	0.843120704429053	0.249405306087794	0.53539832890293
ENSG00000008128	6.42308999106761	6.01727860903151	6.49102394738474	6.22785022526408	6.66179464103886	6.14837508748814	6.44578959019006	6.70171776579097	7.0347308697215	6.74596356349931	6.6719858011359	6.42890651865126	6.66931866880693	6.77201805749623	5.93463477327954	6.05832914099532	4.59463188741057	6.12325771612506	6.33741950265612	5.83523672458633	6.02581248887623	6.49914855049553	6.55975635066565	6.19716473243962	6.22744775460808	6.37563093067144	6.63782239254016	7.13875193536814	0.17864658720322	0.661990075764852	0.0260474774300277	0.367321562535785
ENSG00000008130	5.79454902360757	5.94376442117463	5.78397376429701	5.66960142500324	5.61297768452126	5.85290776592216	6.04196137958595	5.20368433377572	5.26365370570635	5.1047229121147	5.20048997668521	5.20619997298963	5.06078419585613	5.35713261170475	5.37994458322823	5.36549721247494	4.81764142322242	5.53663206666204	5.26830921471541	5.52145865608466	5.6016102225969	6.0586864236711	5.82785677274341	5.68152967935788	5.27777351077805	5.36286607977957	5.80740854713588	5.92978881916875	5.68332881588533e-05	0.00573614504148118	0.0822343966192309	0.886160183466379
ENSG00000008256	2.52697761274966	2.5972029395408	2.73149245589466	2.59272746940243	2.62255630084977	2.55232699406961	2.53478498544947	2.42264865941762	2.22131326237157	2.21908886622076	2.88051440325404	2.49284979243343	2.95392073900509	2.53215015995326	5.69982562434339	5.85370159638129	6.16474576169771	6.01940375418915	5.83413115553168	5.51602181487869	5.9851572740904	3.05600209092471	2.46600704956014	4.59325312695415	5.54597701087616	5.23429901764935	2.63939914403204	1.94872249892222	0.978258766753777	0.939316068199607	1.4225846508482e-07	0.274012294854351
ENSG00000008277	2.12870469999891	1.63876379665041	1.29768875569573	1.15701070007499	1.62202172193773	1.02120910622874	1.57706531065101	0.873446836382122	0.752496245534175	0.580293903636965	1.21520573680713	1.37860158574181	1.5784551268414	1.34302989025785	-2.42827889394849	-2.48763303240631	-1.4952135818478	-3.02090513429235	-0.568355368449971	-2.41056310600289	-3.30279289956511	1.84988351616092	1.30342187599544	2.10442575578959	-2.37131223548159	-4.32105098631569	1.15473300591496	1.32061981272076	0.300736479743669	0.770554946325789	0.0434265702066712	0.48744580003452
ENSG00000008282	5.54849481481682	5.21257515142655	5.25979381569482	5.0632949960619	5.03449778913273	5.11453060064397	5.19613244568634	5.50140386379353	5.31377693375378	5.72622330235742	5.27309229435086	5.39486405905327	5.17920572373789	5.35220011265126	5.90665792643798	5.5836981671488	6.04452953660153	5.86418255108318	6.16372084572747	5.70271393686257	5.98264358081687	5.07960075688513	5.38055612577209	5.21451581984801	6.57684360613683	6.39187000917477	5.51958574667161	4.93106106906959	0.274606359037056	0.659184503044115	0.846681271746654	0.00769847442183184
ENSG00000008283	3.27560346141315	2.66773684830367	2.67137365769639	2.60879732149715	2.22332115348923	2.80589409274986	3.14034794334671	3.61374814904914	3.57663523942086	3.17700224463873	4.00449023350024	3.66683816927108	4.22312033679488	3.89060546952581	3.98796732606897	3.9605087632892	2.61457481845422	4.09793393559205	3.7086939066499	3.78153780225969	3.62286179279865	1.0540389849807	1.23630905876014	2.89710166186262	4.69142719212035	4.50308774117585	0.536861523678884	1.46802103068446	0.00336640502640228	0.0303955731918145	0.0222238309207932	0.0370104445501423
ENSG00000008294	3.582342760027	3.5450015016845	3.40381340236764	3.04902267035123	3.45756323341185	3.09336185909896	3.38686487351991	3.98383493116339	3.85258876176879	3.61639314527007	4.02935061360686	4.02880992430136	3.95495412804767	3.89644355438863	5.01513494371757	4.93804593291341	5.0550430028523	5.09315354846695	5.31050958370676	5.22295110005093	4.89002591999922	4.63816002959808	4.3298115403854	4.48338591717214	5.12134913321607	4.85211252017731	3.70802644655706	3.35605199489468	0.00602726364193438	0.0404827565242441	0.00462687301628438	0.83349679491303
ENSG00000008300	2.39293685410105	2.51846470475246	2.03351414689543	2.14529721878681	1.66243163464436	2.09603818770196	2.12957128563574	2.30155771041055	2.11006583820029	2.34653584174338	2.69788846483597	2.93169831974371	2.65330034874286	2.43829383617623	-3.52148722547458	-2.60410167335488	-0.95802280000746	-2.03483418098397	-2.86334114358876	-2.31905723311028	-3.61930337190998	-2.01292350201151	-1.17125094044583	-0.747965607035529	-0.787657645415674	-1.70217387626546	-0.715922083481667	-2.8608530816958	0.0235136956978587	0.0264886198558227	0.0255946033609064	0.160971132345801
ENSG00000008311	6.06851465530907	5.84954059938257	5.80963619106841	5.5819618641656	5.95982343755804	6.22125589651216	6.02019798237718	7.28293256967325	7.20965875741722	7.22221898155341	6.8614232087067	7.53033727148845	6.81061276290842	6.78798974612672	0.389677433846517	0.682058134122154	1.78898342191786	1.99235502278897	1.74286544190432	2.35314286793601	1.99748522714757	0.100999906210244	-1.16580153834399	-0.774298091700028	2.90131586540474	3.08249705900424	-1.0568306175206	-1.01469624150363	5.74699590033241e-07	8.58606355847107e-05	0.172906195305083	0.00905306626130602
ENSG00000008323	3.86540991434179	4.00909746207264	4.08995835056136	4.24582506249867	3.92573886840942	3.95432688949937	4.04249882927084	3.24303946728059	3.15044407608736	3.33140575020679	3.06840237374844	3.20904517657144	2.77051175837523	3.17181436978198	-0.324207024045378	-0.66101517026455	-3.2803472491338	-0.214399414046069	-2.84644132937052	-0.815978182114335	-1.14955670909124	0.0285442563561926	-0.836980671562446	0.413625591612486	-3.41897125522561	-1.6708965238404	-1.10279634720877	-1.31140232632125	9.33299390909171e-05	0.00942134108688382	0.710336689637165	0.311295651246556
ENSG00000008324	5.51111649817338	5.29905131702752	5.65481065881025	5.73666679422343	5.67678304553282	5.61878558482462	5.76249011428978	5.84304604989418	5.92753023188961	5.56663160556314	5.65474601000317	5.15223978626987	5.01413361330622	5.31339426785907	3.23126863246289	3.63694679915043	4.10021395860974	3.66484046846899	3.24516482766628	3.55133723027542	4.38845122788896	5.79288024863458	5.88132988291894	6.10266407104915	3.73932533480422	3.9098629969088	5.80703128272491	5.6094741917555	0.479004109677772	0.540447434274736	9.47346660603046e-05	0.818242464871156
ENSG00000008382	3.73589564644181	4.20693825508981	4.2481349845427	3.93535046216865	4.31767093889517	4.50652559068019	4.24916811554298	3.90400113135982	3.84626507880692	3.95478346159445	3.98840934499806	4.09306717354593	3.2999639908501	3.65518943866376	2.83031311153885	3.32671030968938	2.09310659193899	2.80790492730697	2.09245040289398	2.97001257131749	2.88746191120221	3.2382923518821	3.52737863891493	3.13243388170298	2.56224237548541	2.79784532278995	3.4021382136619	3.65695473639226	0.132258441314053	0.737313136749159	0.327548260434539	0.901728402463832
ENSG00000008394	6.68397951918865	6.58877519140075	6.82044547259821	6.86541909559979	6.82651800812985	6.81600576263967	6.85660257910191	6.90759377322364	6.87266209250308	6.73779608841209	6.75405490102595	6.5766763070764	6.40090310089121	6.56570426841438	1.12015661293071	-1.86657223920992	0.254256223838114	5.12483889528504	5.15473286062722	2.50134439189804	4.86829647247775	3.130073979999	2.44087216025006	4.20841599650273	5.69700976284249	5.96156347787197	3.70038908246794	3.41027863478606	0.892561600321785	0.932005552801067	0.00482558347013468	0.00269739978734719
ENSG00000008405	3.7151559497934	3.10341379202101	3.07612978289252	3.16372489941526	3.31341972578538	3.13354432234968	3.29611534729368	3.53290425119083	3.68480255554259	3.88304332549522	3.6295610272539	3.766291198705	3.81756643519629	3.58167797033546	3.31894263287233	3.46801587098973	4.21559657025788	4.34355571378451	4.65304136716472	4.10999314514701	3.78789414563542	-0.408558883750839	-0.0497724599008074	1.60331898899341	2.83058453933971	2.8299764484599	2.05217299081256	1.74303643985398	0.151649190033291	0.39730939614357	2.83376725632118e-07	0.0394520905386833
ENSG00000008441	-4.06855147870092	-3.52861643912946	-2.99491837538101	-2.83969332675135	-3.32131333880572	-3.43104701297092	-2.6571271288375	-4.85345372897256	-3.35788787385963	-3.34098420839005	-3.63354502527327	-4.78204428237463	-6.09334298218596	-4.21500807369122	7.50098774517908	7.75262677382075	8.21114497393149	7.87734334771185	6.41696107100203	7.75826489792151	7.76133391741759	0.678363961248557	0.951984944655087	-1.60980466503292	8.21116980920367	8.449152361495	0.0488562634888541	0.548029100171001	0.477520404199523	0.730120071170881	1.02122149824661e-09	0.0511550657811562
ENSG00000008516	4.02413881189174	4.10059521293529	3.97935657125216	4.29532014542228	4.13515170570917	4.30134485143701	3.90336881051753	3.79929224033412	3.73259107421963	3.96521673729799	4.29268442439891	4.08380400327573	4.26682146735769	4.33720103241796	0.811986344091215	0.480705144483954	1.36621188744766	-0.350680051676446	1.0063390517371	1.01533683312587	-0.247708273642397	1.90951967440874	0.61102787473264	1.22124449806592	-0.734795160858881	-0.487056018985284	-0.820497351047173	-0.474445851538096	0.976489971483035	0.881962962999463	0.270655119427166	0.277192989299905
ENSG00000008710	3.02377182278263	3.13726419967305	2.75500203593578	2.84070252489121	2.9651368336271	3.62973898612036	3.11802410424589	3.83342886857762	3.94832748932728	4.38688159233486	3.2091538903849	3.8329643260339	3.62238814126751	3.25422849856523	5.31347880807249	5.89720323100488	5.0561444692725	5.424591875093	6.28658021335712	5.95769253653682	5.58067220018238	3.37063399052837	3.37734176072159	3.33040557949891	5.15866918334306	5.34660414030829	2.68415555151066	3.20398981129267	0.0530697223409875	0.37779421661913	2.51066770869912e-07	0.299211738312972
ENSG00000008735	2.28565178225983	1.46992837903506	1.38113652784075	0.743340327828842	0.665269796762938	0.133081163541603	0.979520288259644	-0.409194873742599	-0.191342986912729	0.244293119536461	-1.53012663001934	-0.392453791182138	1.9866633275806	1.50850961894578	-1.19379550202558	-0.00686380647212587	-2.50276500179644	-3.35394040324587	-3.06910804741058	-2.91274617559105	0.36691540530554	-1.01444239455773	-0.33469433802591	1.59960232843	0.711712907076749	0.817031593428937	0.343426806307354	0.359778646063263	0.099639312787824	0.133396448819294	0.00388202045709481	0.0348435609731735
ENSG00000008838	5.33811508880495	5.54328269352759	5.43077627577569	5.57117382290917	5.52790106016764	5.47875184175912	5.43968749951517	5.04415357536588	5.0162718114164	5.0036081104606	5.30781735901063	5.08378208375123	5.08899858663853	5.21472752441381	4.39222782741175	4.65072783051336	4.24663493095523	4.76343147940969	4.54801150735834	4.49212510405699	4.58693922468943	4.71365964537933	4.92737756318354	5.51135921549369	4.26907614637205	4.41929518590935	5.19919028965059	5.26178990120509	0.0128248977873166	0.210421614776429	0.181706917279404	0.563407371174598
ENSG00000008853	2.51497971453523	2.38260225662889	2.18827867436282	2.21329499420725	2.19244672554491	2.6359780806264	2.20862707890931	2.10069977197282	2.18884018602668	2.35894530291588	2.49704444919723	1.74414919119651	2.31347583388713	2.10512859329901	3.04158597249919	3.63673718571576	3.14940396246594	3.245538412341	3.39670175964249	3.3226845603746	3.40061681900125	4.03077334346474	3.76026450191916	3.25774282760976	3.21201820776068	3.20049393409111	4.04255752209974	2.85765435711104	0.500633125902403	0.621465540567314	0.645684096496995	0.818242464871156
ENSG00000008869	2.0288293230732	1.85502672622886	1.52606182320646	1.50960648278595	1.80259473612564	1.32513108965554	1.79138219756382	2.29519358466771	2.20252924892806	2.08517119881269	2.50710541038778	2.36554008366183	2.77923268453008	2.87628510858185	2.07272423585552	2.68759110614569	2.87347511990484	2.18642120112396	2.82055418174618	2.53772513065404	2.05395159933253	2.84152699809241	2.54315958377259	2.86320817031896	2.9808859007079	2.90110606386451	3.7690804147843	3.34241767924441	0.00631036444186502	0.0733662924038175	0.0219099282363743	0.258165004744256
ENSG00000008952	5.36338499948125	5.36394906552126	5.33060781283	5.07301336401307	5.11865227030728	5.01996560479304	5.28711936267434	5.53801573085248	5.40570000407915	5.53242978889308	5.27636466412917	5.00792370499534	5.56982355010957	5.30990977303839	6.49977176137356	6.48170490711804	6.24754612116238	6.24158097527106	6.45955997457469	6.22532057244957	6.32240771624394	6.80544808961986	6.70108289247016	6.25653517319213	6.6923275422484	6.54780665315808	7.07390465839156	6.97550218637195	0.62775198105545	0.795565182057626	0.00884133397552562	0.245784230503065
ENSG00000009307	8.00614827257705	8.06148169178242	8.09089635794813	8.02873193082116	8.07597792882643	7.92263918748243	8.10980918015895	7.77244000800376	7.77140445696896	7.56721213944764	7.80633243607101	7.9477467113892	7.55960104427251	7.75938809872377	8.15579370366353	7.98290112444425	8.08915406844596	7.62849730885502	7.77474858788563	7.96584797708116	7.98507025093589	8.84357926761457	8.66772990616886	8.641757285792	7.96694421452372	7.83214935935325	7.68100194797473	7.6783471824491	0.19995872277602	0.680394228712669	0.362563075508775	0.927338382241773
ENSG00000009335	4.82205338089255	4.77576361622387	4.76375945383401	4.67546898464289	4.7952949415876	4.56479255965817	4.63100449155262	4.68095919220351	4.65968745406354	4.40612730927462	4.81160813187997	4.73329961187386	4.68159445029601	4.69358035544986	5.47276246952443	5.46537236431346	5.34145274958331	5.52965667949675	5.81851119092314	5.57586929241767	5.37709200602935	4.81204197903005	4.64653478341844	5.29046753739596	5.42621031187048	5.32895333068565	5.24261969099531	5.14456883998175	0.914699847109583	0.856463766709073	0.00870880517613986	0.577484767959118
ENSG00000009413	0.944622350386285	0.891514447208657	0.542992945045953	0.432488964319282	0.632997807890619	0.979934732855821	0.691366418065461	0.836626933701409	0.899128390368575	0.770015176462267	0.802683939241588	1.14041508313946	0.806561568371741	0.663565592212786	4.24914495022194	4.12329740614357	4.03465089362668	3.64582308137171	3.42720462679617	3.3435087151171	3.51616003913435	3.16554581490174	2.80308848150164	2.86026739381128	5.86308062765287	5.81263639789305	3.14149530175462	3.22925305024457	0.584490595741246	0.596183569113141	4.19682423992663e-05	1.62591420729137e-09
ENSG00000009694	-0.211011438588272	-2.09117170997173	-1.70735465429497	-0.937486106978983	-2.2727183746662	-0.963028831070058	-1.84077880698711	-0.713610288951307	-0.719521629224501	-0.280157844189802	-1.05266063571436	-0.969183911615273	0.57565028826961	-0.199591164432336	-5.31935154567011	-5.23923719533067	-4.22757150576498	-5.16360879106345	-4.88601959433855	-6.23859040088622	-5.16429082975155	-3.7408578312777	-6.15512972833292	-4.84695242156409	-5.6100235579594	-3.95041400133938	-2.891263867515	-5.0276162250302	0.0968381158715898	0.658380805929029	0.487777940759084	0.812619227293065
ENSG00000009724	-1.43043423676389	0.117828400770119	-0.660769902171633	-0.557954256966776	-0.587444484316275	-0.0827261589708697	0.279992930419849	0.65997525497728	0.361803520015979	0.316702304665983	-0.295191947934085	-0.193921933325418	0.0384912909853161	0.506349958866989	-0.103035481896326	-0.992220446356536	-0.831253708199997	0.111055053468579	-1.64549708551595	-0.486071881044396	-0.163987494531558	1.65096532681078	1.29258401224214	1.58876869443179	-0.154475296974609	0.546719264483212	1.24020901200653	0.789843435806526	0.247036627956557	0.854779187911925	0.000499684873756696	0.259612334071031
ENSG00000009780	1.76926610913333	1.33418650340813	1.93980800110646	1.95304397625277	2.3279511082689	2.10412153796698	1.97497193905467	2.2119212868406	2.22621503338357	2.40683409337801	2.23187847126631	2.48275258487069	2.30049500177228	2.43371166880861	2.29531828434442	1.6134448420182	3.17131736802393	2.19910191156282	2.41262969255419	2.23127697195788	2.05311262283255	1.87162446069427	1.75046178140414	1.71901895807229	2.3192709740629	2.1521589757588	1.6493333437594	1.99931778033587	0.0553593763213916	0.19891220816988	0.234857117306771	0.960443291804904
ENSG00000009790	-1.51674693199569	-1.11143023143271	-0.784285182278124	-0.653804062187195	-0.815207687830618	-0.592198012765135	-0.928310212059992	-0.553874012313466	-0.519348923381908	-0.365324149633553	-0.344067072680396	-0.702943779369111	-1.38818009737356	-0.714012092786614	-2.69882839237717	-2.05129434706233	-2.19091669249276	-1.67017812686478	-1.89836610097528	-1.84376063844114	-2.2049793575533	4.03081203896985	4.38247464652326	3.91403729636482	-2.82303368605633	-2.30800573472262	5.14940288979847	4.81822817409986	0.661212042501225	0.737406449544492	5.36881202063171e-05	0.760415105615188
ENSG00000009830	3.27355003020539	3.12209912335296	3.15359734369574	3.29930110766084	3.3783843469924	3.17125896716079	3.4324348168655	2.66394100511134	2.49983685554044	2.69131490877182	2.88378160588039	2.84936625810484	3.01144503259957	2.76618207760773	2.72944351413358	2.84321724099987	2.46318612800292	2.97433960311731	2.71133283943911	2.98352640250494	2.51643740673627	0.529680702979063	0.0206873785889528	0.960588862196766	2.79963717870551	2.88033434807116	0.7657332340303	1.08475210277096	0.00272079834633233	0.10234778695846	2.30813821605587e-07	0.823856997282072
ENSG00000009844	5.62804606357793	5.55874250859237	5.72642993749411	5.74235779944896	5.67555401301482	5.6103353804467	5.70900831669258	5.92794066114337	5.94022324867979	5.78092189568005	5.74845193693563	5.62299443447807	5.67008022887611	5.81095267065389	5.78468173278406	5.66042256173929	5.72278684411527	5.71076978953249	5.9080488330191	5.74110398753226	5.78071573700807	5.62670634698955	5.61772755016286	5.29725712193468	5.7183046964158	5.48835441956415	5.89562028348475	5.85902834203017	0.45681959081228	0.942087123757029	0.227319990089071	0.48052087669491
ENSG00000009950	0.123635745819616	0.520776973181184	0.040562166387407	0.102824412293074	0.319645175778603	1.13772445927359	0.293700492590543	0.938521352442576	0.889836833304459	1.92502350757891	0.539224003226521	1.46876345709045	0.00911413533345429	0.638044011555189	-1.7887368088644	-4.53739006253702	-3.56130400928361	-4.43582639709358	-2.56910108644453	-3.97210487814466	-2.10020498562495	-5.49161400315488	-4.0096166332868	-4.40883833979998	-2.57104890027359	-0.890175500269926	-5.08436985020161	-4.38855005915132	0.167330390211271	0.304360690072984	0.91444071366171	0.185360379547555
ENSG00000009954	5.98863720991186	5.39634926897232	5.16305871383034	5.16264273331975	5.35445917928149	5.05101071123885	5.23493541013572	4.9630854396127	4.86403237016733	5.05608416087913	5.37477991045025	5.25151082792621	5.48996290005231	5.2932142712635	5.845707818294	5.79959065405403	5.88093705767435	5.8660568730177	5.60057388964411	5.84060845602392	5.49580050772734	5.29446807457045	5.20318542609082	5.12590788735163	5.51945364966592	5.40394357296033	6.00175737416106	5.96999966998156	0.635418329395324	0.965267555787544	0.131502178922498	0.402505006467678
ENSG00000010017	4.65567369819983	4.91810075605104	4.82430456861148	4.85496012415339	4.77451542537578	4.76772890984411	4.66135901130246	4.83865619680734	4.64635665515768	4.83081387087922	4.77906450908566	4.55349846375078	4.38360258288756	4.45548437585572	5.7795884777605	5.95249444682213	5.55558081190634	5.64021280260768	5.90898514202251	6.13262235564623	6.68138253681945	5.1978542507575	5.09570929960226	4.7590213946547	6.10294203047374	5.93899954473647	4.72757605501772	4.77816521342893	0.526957092420535	0.770554946325789	0.00361502295718832	0.85483241126481
ENSG00000010030	-1.69793703689748	-1.19715379868979	-2.44814730082357	-1.67243731675106	-1.20673735559393	-0.351963344001051	-0.770955671461775	0.189518579500801	-0.198270571515688	0.864543369589583	-2.51502539203207	-0.649604038561432	-2.98895019864662	-1.62907661480802	2.33475499020164	3.26700999208568	2.95871662337188	2.54669915168218	5.44668364028463	3.01456485334835	2.78409600602693	2.32537817373928	1.37190886978054	1.9212123988339	1.28664538470472	1.82028736996645	4.14176651419939	3.40209913833912	0.930735386352033	0.952055674648588	0.0836295741362984	0.264876907979912
ENSG00000010072	1.67868091758048	2.19686314118137	2.09842315214404	2.00429947158078	2.07644212536447	1.84836580082762	1.89290979860745	1.53159520923743	1.56315295500135	1.48729325291609	1.89998589342798	1.19150245215212	1.83963827792478	1.70970911980171	1.65352332135308	1.53813563664378	1.48118226278103	1.82184046081655	2.2790634060669	1.83031446906248	1.61596615825996	1.21848502232251	1.06402788727235	0.666194588978473	1.74386121899305	1.54505002185247	1.54305822916371	1.6496466101288	0.0478132558346848	0.178443542979468	0.0903794634317309	0.83349679491303
ENSG00000010165	4.08835902500922	3.91435577334093	4.35616721502831	4.12149542164661	4.11967553500126	4.01445530551422	4.30241186818413	4.77442727593001	4.81930915396912	4.64499083384187	4.92758972828833	4.7563377262692	5.36989105340599	5.13050175514884	3.17093815719592	3.16463452475271	3.13651085848392	3.6380040944513	3.05047634746712	3.32236790869662	2.98884612739814	4.40762487932416	4.24136825860393	4.74679548222217	4.45993639914839	4.70736139782029	5.05867856493332	4.96778781847207	0.000134588029811472	0.0119890828833213	7.36561662573994e-08	7.97196672412881e-05
ENSG00000010219	0.735239501169861	1.28483312027737	1.0968897359884	1.95981800417744	1.58052863953566	1.55414684302608	1.37866373450148	0.849366561163254	0.764582770983216	1.27805074619813	0.0550074930974598	0.190259649499433	-0.0587049377677582	0.382087343189321	2.17255895864503	1.96800468724202	1.89601572598803	2.17818463244765	2.30395823288455	2.35764859222326	2.81213855662572	2.01645480954233	2.38485865088951	2.10824896341318	2.47808392757131	2.77205398507657	2.32700075606507	1.93624974847924	0.0035561045931491	0.0318682690905325	0.455624997449114	0.304161505021058
ENSG00000010244	7.51329758042237	7.6029484576418	7.76452513186747	7.44253470374803	7.65551120315644	7.5396764747353	7.53396045890642	7.53436683716072	7.5838786344108	7.20715350905046	7.75602858809976	7.07802230973835	7.58886560696903	7.62828170666562	6.88060999608027	6.87454999362858	6.86666761020709	6.92683193122538	6.67929216848264	6.87856353107005	6.73361968112795	7.44100672594472	7.30211879082396	7.39460669568675	6.72041224289088	6.85621539100179	7.61077449251885	7.49819981298928	0.352822586161529	0.43360744193995	0.0225798672351781	0.865442562575003
ENSG00000010256	6.98280385220119	7.27682405111765	7.39197293029148	7.31713548196982	7.16968855483322	7.45358789260453	7.28849664153152	7.07314331664281	7.02948263380893	6.96968455207936	7.02620952440492	7.05469983333859	6.95773607689367	7.02204742405558	6.93159628924899	7.00096387080124	6.67328881102049	6.87502831512951	6.93576613127771	7.0030931919493	6.47909001026612	6.67243642271533	6.79969985376265	7.18431042094669	6.4103969984129	6.57384428687183	6.87122223083923	6.93418626176796	0.0446113146924704	0.262096066555915	0.171620160978099	0.0793637015315499
ENSG00000010270	3.36208096043198	3.9147323605517	3.66975962065288	3.68554412642447	3.69669262863878	3.63785382892952	3.53407678923791	4.23081922361556	4.20465804723164	4.26729860505388	3.8902608786065	3.96035560888302	3.94334525424599	3.88960753752426	3.67199189884826	3.56658791921195	3.68864156241928	3.7114893925547	4.40513846855751	3.68222577559142	3.3160294413137	4.27141352649133	4.4702257570466	4.49169475532367	3.44030450568206	3.53402844912688	4.39088094311188	4.15222420012043	0.0188114477198383	0.286937655227836	0.172123989832979	0.460378682924958
ENSG00000010278	6.89155652266809	7.07675070737461	7.17753560198445	7.31821028367558	7.06944764019518	7.11945181260488	7.22173192265843	6.10378806762537	6.04473875976897	6.48194207984099	5.29069689962453	5.59765363580228	5.73268498544779	5.8373162641854	6.68972242973132	5.20644887272812	6.49120911963499	8.36909496764816	6.45191666214388	6.19712968724539	7.90362700336051	3.38692057779543	1.95625656574616	3.81113264227474	4.54604833353214	3.12924944326947	2.10771028487266	0.206733384242913	0.00584854003102068	0.0359379454707915	3.04217977649579e-07	0.00351306816171954
ENSG00000010292	6.9408998314447	7.12485668336775	7.05870251659562	6.98312405989562	6.97639856802029	6.95242358430159	7.0329777876749	5.89338115866591	5.98297285662338	5.71713108811868	6.31811817266427	6.58001271773152	5.90701704850571	6.36958476578032	5.12374619653739	4.65095932603348	5.59813769853164	5.69139115773311	5.0969510112468	5.4262302434304	4.81839963262098	6.39053788836991	6.34073028493466	6.47920754746462	4.55065273074807	4.17741340553998	6.87027480571104	6.71821491141039	5.41586018629196e-05	0.0450621106761631	0.155823045451465	0.010646298938103
ENSG00000010295	2.50705995484106	1.88971081601079	2.12561093955478	2.1986349723743	2.38775105885185	2.3058645425463	2.36083812146729	2.27912279304001	2.63901943096523	2.55041293351352	2.35707420298516	1.99832820957425	2.31267731425398	2.28837291188283	4.32820059087561	4.43276795141641	3.92325234889617	3.81529938825593	3.58445392164237	3.79685824398974	5.03496343052646	3.17848434057091	3.03132620897073	3.03056669363425	4.47773466788009	4.69423789471052	3.25813677264417	3.49927712725029	0.9232019544197	0.894036043075656	0.212645436095846	0.156872800041609
ENSG00000010318	-0.377605227741054	-0.655485053862644	-0.214539409989205	-0.308580035319237	-0.1130312862065	0.29654948382765	0.0788322848947889	2.01115851670541	1.94252458189311	1.89549166289167	1.35247575892684	1.75465785045612	0.30359969469998	1.15639728488437	-1.14692614139056	-0.477909678362133	-0.442267401749151	-0.277503115856515	-1.77661869867031	-0.426045997998955	-0.581751225293071	1.59313345784691	1.52615085332121	1.6003067927856	0.6614546144881	0.657088270039565	0.80650788888368	0.929754004217379	0.000160385690547514	0.00267508700723015	0.000494169907143179	0.0761809683399468
ENSG00000010319	1.48888550236742	1.21389911886582	1.41622788844523	1.32000408468851	1.29137533321897	0.84116519655153	0.409789439497243	-0.356601154063295	-0.500502352223969	-0.987842185722505	0.512947179720841	-0.520560828842485	0.277559250267147	0.120159893543213	1.03744556475503	0.533025531491849	-2.88500776321063	2.84363583909089	-3.47415034770374	1.80604399157566	-1.41977397887962	-4.81772896322101	-4.92142796627745	-3.7422354098637	-2.62567375895076	-1.30612256412939	-4.40810501872658	-3.7106758109411	0.10787706139604	0.428242899583099	0.00329162171937283	0.335275136129914
ENSG00000010322	5.14492319893579	5.04691989985577	5.13220040675296	5.0315616535938	5.22362817193812	5.06659987132136	5.14568230519013	3.74486234777521	3.89765624589439	3.96250189280287	3.85037536214539	4.32420924371877	4.19230335909174	4.12994942565517	4.52581583293314	4.58589581712756	5.00108686677615	4.22275762703859	4.34604558540265	4.36428310177904	4.7291440340703	4.09832203514644	4.11034526843928	4.2442037453595	4.46362777772029	4.80044284326308	3.82818016320216	3.81299388827197	6.75948538793682e-08	9.08644007577216e-05	0.130472116119662	0.758222988119369
ENSG00000010327	-3.18476640520884	-8.23900294704972	-3.09216777346246	-3.19024656856729	-3.67976503534454	-2.25481330953081	-3.60082098411527	-2.50357484566843	-1.68788895820753	-2.97205634151262	-2.45995429498601	-2.00767509253256	-3.77255239889557	-2.58842994979737	-4.37965926635856	-3.56705589172038	-4.88497697592465	-4.22280665242739	-5.52945464518042	-3.1915956215186	2.97257645224268	-3.0392356924958	-6.834080327643	-5.55267637257168	-1.21170506172065	-0.449056071866017	-4.78111532093433	-5.69013992694861	0.264985857977374	0.405119340168449	0.827327116464466	0.117451445480887
ENSG00000010361	4.04659932063444	4.37542428080775	4.53339110458158	4.62528821673429	4.52382701529522	4.77420592810178	4.52374682455472	4.85555253868889	4.92923888021101	4.93580417724519	4.42892409303134	4.70513974150273	4.24515983585919	4.820339086675	3.46498206763542	3.77610116238768	3.4664964478825	4.30670392975155	3.37440897116919	3.76483114300496	4.16728267716582	2.83691906779362	3.26900614660384	3.77203559899877	3.67719140157105	3.98330793465938	3.22291170373441	3.12688698684518	0.428605627235187	0.849470718694938	0.344931637641398	0.924498246104938
ENSG00000010404	4.2494943496698	3.54535728483035	3.06873097477792	3.61452305336037	3.57674439431441	3.12366003582732	3.48810807625665	2.52636059460212	2.16831625100289	2.81764197850049	2.55792110238089	3.16783299656968	2.95637219324408	2.75495469900399	5.57973331581465	4.80868110684617	5.16205135871367	4.84126502344748	5.33501546074728	5.4879453606092	5.13993497044067	4.72806693880324	4.42781173730127	5.56505809275329	4.30120782132307	3.85838133259709	3.94143186803319	3.97246344473914	0.0469479677563604	0.343832270727557	0.00195002561811212	0.0260493453068529
ENSG00000010539	3.28970138795348	3.21362286379445	2.9806137045425	3.35386017503036	3.03012709816335	2.57271144904458	3.00967566692964	2.09788590985995	2.44336490623557	2.3131667657156	2.91211526732931	1.81021615116985	2.95804003870852	2.59155712923316	2.03035171627649	2.38207385908567	1.01490074207407	1.82999055214025	2.12826541315915	2.05677161280519	1.51923405585414	2.58477732311519	2.56105564641349	1.2132712031259	1.29669560790661	1.36381673923805	2.96501451825534	2.59276456651656	0.0511713335210311	0.202541476041742	0.941045758305064	0.559974464701352
ENSG00000010610	-0.00949459267122066	0.25440786889284	0.129775613647111	1.15109106184867	0.916251430424443	1.22825374877088	0.911927791048977	0.867410704685857	0.822635118567011	0.851131507428112	0.613148511823816	0.587819430129366	-1.57448061765889	-0.392637772720991	-4.73579897154712	-4.01276532308092	-5.38890673751918	-3.35050054728799	-3.02476765497565	-3.72058090262033	-3.27358078241585	2.18060263633983	-0.811072701517001	1.90112306415346	1.65543785396071	-1.50237970565624	-0.472089110072121	2.06552244266802	0.731673871689974	0.974484253348887	0.000503002566026202	0.0274630484668681
ENSG00000010626	-0.164825341465144	0.156795741402733	-0.0776621491210996	0.0165419329354515	0.17915369960208	0.680306473605512	0.55051998769399	0.933229576278322	0.68147780367227	0.740626898626522	-0.388003982270417	-0.157082445676656	-0.444178609676923	0.248302327962071	2.60103517039261	2.50154012255438	2.3366229045576	3.06671613737487	1.74560484430098	2.65314992913233	2.65527762426406	2.67019271632091	2.64298505331957	2.31396539874875	2.09815577482989	2.05611707939536	1.70093087644089	0.47677083332635	0.878549798183441	0.722005804797843	0.186974550184385	0.513360349937206
ENSG00000010671	-5.20325173679619	-7.0834015688706	-7.0101632255215	-5.25144987263999	-4.57193656530694	-4.45774781168541	-7.12501610521421	-1.76429985741897	-7.65679592834191	-4.8663400073917	-1.9943507406686	-2.72910113585613	-2.5760051530783	-2.13470631192756	-2.8982575105087	-1.48081938941336	-0.139813636030654	-1.88680353697316	-0.859755757691687	-1.98072931600873	-1.56854035860718	8.00983593906476	8.14184950319051	8.55014502143083	-2.70946110707316	-1.6998468249272	8.58344991375077	8.22191407553171	0.0100145940806559	0.0274401760406279	1.36238862081755e-06	0.745202829903858
ENSG00000010704	-0.475999211080058	-0.804014683227019	-0.956101508206312	-0.328741496858247	-0.472291403563059	-0.590573775763145	0.0520757969388324	-0.459824964556096	-0.278746993236265	-1.58248423762786	-0.483293714655538	-0.593215197088691	-1.52068389157874	-0.541488116030675	2.87809283345973	2.9134050311802	3.74291178416406	2.6320223356291	2.7255521949327	2.09155262126211	2.41264220711613	1.19716705297013	1.29763395259005	-0.140844513711849	3.66112773927418	3.31236970348397	0.63623482590653	1.18205610563275	0.794638974717649	0.984667549201996	0.0347038496842372	0.041821282371638
ENSG00000010803	2.60031616208624	2.67780136670542	2.33318468039583	2.3537163384628	2.39959498382014	2.90240634172249	2.50244257121935	2.93528974404906	2.96410711576506	2.93758875116939	2.72249093990483	3.20952787700335	2.67798072723559	2.85178952998203	3.93419630112573	4.25447508358573	4.13055570001289	3.61239402985625	3.78462865445808	4.23077277847487	4.74470681871623	3.62554004915558	3.65899131463572	4.26009996302087	4.30192043652574	4.44604194635573	3.61754337071142	3.8318071909051	0.0962340031420222	0.238839027098609	0.930508493210681	0.401922466710321
ENSG00000010810	3.88306454213326	4.0803335538577	3.93988803780898	4.11424020477041	4.25011347754816	4.14769383455078	3.97563754353837	4.53916196158978	4.50998761491749	4.80655312869041	4.45800939359089	4.32552149467402	4.07302766080036	4.05689119157671	4.94921228230262	4.79729644556932	4.67653210566849	4.38118897202448	4.07404586603864	4.47771803385283	4.99482748153889	1.58427657016335	2.51503762060361	0.392634893226028	5.23612028831105	5.66702053635466	3.76164801895872	2.99638338672115	0.392531283682876	0.644055655952943	0.0190862666896701	0.144256153184412
ENSG00000010818	1.10232070688482	0.682848461866511	0.59988753923351	1.16347947388146	0.789944769634738	1.0661327927975	0.970607375830031	2.0337163979619	2.2490059948116	1.92618967418006	1.27080658205705	1.74011138029218	1.01891409124566	1.32356860969046	3.58171159775054	4.04195124433265	3.23245729937122	3.46968842286646	4.11637971201789	3.72067884352627	3.86831364123298	3.27935079371602	3.58609249700849	2.7272291931879	3.96758840704004	3.62172671575715	2.18131786915407	2.52680422043049	0.0906599289692883	0.375996849313593	0.106122414404046	0.882939485682019
ENSG00000011007	4.75270171437067	4.72704505758939	4.78942352311944	4.64954423392865	4.61179046205302	4.60353436108895	4.77048478295579	4.52335864233918	4.66141571649156	4.22710784268339	4.52490859877198	4.07548513560462	4.73892126194998	4.65135642131577	4.78584976255546	4.77060517805694	5.0827982111888	4.78902998868898	4.83455406480225	4.64642926541155	4.59955395011063	4.91831015157739	4.96302656247749	4.61177578852084	4.37032987853565	4.24475588871639	4.84105497003671	4.65305364382616	0.0309626975896061	0.0437798047613491	0.0501889907395338	0.0217289661949924
ENSG00000011009	6.52049800316082	6.58637654025996	6.56286440962333	6.60520130631911	6.45496672979602	6.64561224626085	6.51759157545929	6.43384005045816	6.35665210774715	6.25241888289632	6.41844565516334	6.01775011518761	6.39803113381731	6.44604259445148	4.22837752882856	4.47433062616311	3.81337328290012	4.5960287347453	4.68016980746971	4.47456660461561	4.27215002431816	5.40156575162436	5.33478914356063	5.13406695409124	3.99184866904763	4.41708303250671	5.53763489137603	5.47421873891507	0.0257898248822003	0.0660928315671789	0.0122937823606286	0.613996880820395
ENSG00000011021	3.40626313697176	3.25214717094895	2.78889059449311	2.89933140550569	3.1675511728957	3.12046228033158	2.97714590909718	3.22533513121425	3.04043877527887	3.0105381055885	3.01954880548706	3.06391442202184	3.36142649857787	3.3416945402825	2.71959816325043	2.89921851172695	2.11759533771695	2.42272120277507	2.28327791567707	2.36733368023898	2.49421091713758	3.39975908828412	3.29197796131181	4.06615392430776	3.48957828887154	3.42297709920301	2.47233730986314	2.28318276048559	0.925930051092852	0.944283948253914	0.00222472184305651	0.0234374523329801
ENSG00000011028	2.34817099890919	2.91111934331402	2.17170474266993	2.4933521565007	2.26952488738753	3.17940679003113	2.42515963543894	3.03869414116017	3.31550616495268	3.41752346937068	3.38680739985983	3.43614945402765	3.03558697398988	2.79798438313193	8.04694205371282	8.7213648337697	7.61800072869332	7.19425274046187	7.8001540199107	8.25799403050885	7.7804776450944	0.0857778611754814	0.891315736043752	1.29707315343586	8.22697789305187	8.51413843534109	2.16377565784539	-0.661300141502582	0.0512332786427794	0.130006323611984	1.53612824776154e-11	0.313285869029013
ENSG00000011052	5.59724896008625	5.86347144895425	5.96549568198478	6.15665114558014	6.11717940802368	6.2876420212523	5.77499313116201	7.31270670146411	7.47531940256125	7.35060699038623	7.17179008969615	7.24156691305995	7.04221433146194	7.0445717867681	6.80244320517545	7.14062132683458	6.5654724309416	6.9624452646652	6.28562504700587	6.83273499737292	7.33039549609459	7.27689450288593	7.28900274471906	7.12720203912315	7.50379287146824	7.8597820444476	7.45162836192281	7.45105447788878	1.27311405711529e-07	6.19645289437692e-05	0.000202202245136121	0.00274753965131122
ENSG00000011105	2.8844243985225	2.04748523675847	2.13809650430964	2.47755606608169	2.09883987540522	2.1464907917233	2.54498082455265	2.66215181536505	2.66337344346422	2.00449961729825	3.32105309186005	2.41765500389039	3.20419355122265	2.94359335752251	4.38020359454591	4.16623244159281	4.6063665716746	4.33099368140125	5.16543896649078	4.66775731148225	3.85073431202666	-1.65708838531463	-2.6426204804861	-2.74306376097106	3.32821051333384	3.39854313775762	-6.25003158605036	-3.21907796392659	0.269911610414159	0.449619610568602	9.06747409310112e-11	0.0316008051112016
ENSG00000011114	3.13350146509506	2.66708721867434	2.7630486682096	2.66057508847488	2.72371048063842	2.94210427118275	2.83254779314331	2.35803465595519	2.45320239938654	2.42309220664949	3.03025058315949	2.73035693825589	3.19065392836261	3.21026611144671	3.55546109312163	3.61878724381601	4.13156932465027	3.61532574117687	4.13716896737156	3.73009419072535	3.57582815047959	2.76052743651113	2.65704146312219	2.47623589865625	3.57754021827576	3.30638314891424	2.61565029855519	2.9242234448441	0.941253412511594	0.905099350385315	0.000166701326543591	0.321434029174748
ENSG00000011132	4.73003631107915	4.82178916609243	4.8424880336448	4.54324665209534	4.65023732100344	4.838877181583	4.72602953634323	3.77058465190801	3.93221242448392	3.72809737707168	3.44329795502019	3.59094951414322	3.61176268718384	4.01801050371105	4.40896777519424	4.67706730525118	3.47933157203753	4.15550238737711	4.25749236895603	4.33863794143582	4.40389254035979	4.64203638956031	4.54215111284249	5.12146579857263	3.22586194373185	3.5684007994873	3.81989000275867	3.84395221042905	0.000135889428521292	0.00560078704995388	0.181981432049133	0.0839764869733617
ENSG00000011143	4.26144334597139	4.44285561867748	4.35813012145731	4.71836117920116	4.57398734246745	4.59611509578864	4.26081848664785	3.92974605804346	3.91467033383765	4.08603268035121	3.88392957434467	3.90419566496968	3.7079818978705	3.7971307668538	2.96659804829267	3.1897197994923	2.33976496319916	3.68700118484471	2.90094560846155	3.28828569997687	3.00144071892069	3.58592396183135	3.63790901967588	3.18240509498526	2.84077264108444	3.28522479884176	3.3278195738984	3.11451997726902	0.00129672454398631	0.0391371723389444	0.501873467284267	0.951238569662475
ENSG00000011198	3.59883523906976	3.03573168800664	3.05149147943155	3.17567708522646	3.28825739853952	3.15985699920416	3.05413359871561	2.76700969638677	2.47135958432412	2.4026589455976	2.85289520053086	2.64828706116936	2.90440565449507	2.80907928174058	3.97732496657575	3.7401789938633	4.77728925189906	4.22129492487008	4.34416958518481	4.10986290295976	4.05152152689712	2.31740428902524	1.94757362844848	1.57285624271555	4.18269058721965	4.30941940707185	2.93596297862521	2.81416251384188	0.061108255477658	0.312787900533844	4.57609405192195e-05	0.862986092172268
ENSG00000011201	7.3277115976367	5.47156235266064	5.8726514768972	5.32122554034124	5.7668968925151	4.74359062904045	6.22781924430112	4.69839785690387	4.14955640011009	4.52410948001827	5.27878510138795	5.70716319007632	5.81318714415074	5.93452205287238	-0.581543024287584	-1.29715732135775	-1.9272587978293	-2.73694816479698	-2.43240841742304	-3.96088348698286	2.35256325261958	-4.07579279669132	-4.2102290345926	-3.20292453367015	-3.21236230335154	-1.49006114842197	-1.27077270545028	-2.83858509469806	0.240675008941303	0.749293598774201	0.447456935093981	0.819521301556341
ENSG00000011243	6.3547056585119	6.55912455214126	6.53656273190758	6.67266065046491	6.65684383952397	6.97074979257849	6.63631925723436	6.66627059535558	6.96081574344709	7.0296423910324	6.5232807516483	6.50124100583548	5.66285693520928	6.31724303819284	5.14283754053338	5.3328323622227	4.88496244119911	5.27851594871591	4.87039939975503	5.06962138052772	5.19931565442643	5.92898014424288	5.92297788046431	5.97668383461153	4.89791792540436	5.18691348856352	5.39575863902625	5.62431220279577	0.648097202408925	0.799239011152401	0.190585660072455	0.894050777275091
ENSG00000011258	4.40261430231964	4.29285386017043	4.05165822326663	3.77259487378762	3.99339053385843	3.36625140686824	4.13574182042683	3.61013271885432	3.67704917863519	2.95114954081319	4.30398732526623	4.36641674191174	4.454571324247	4.54670767015605	0.935963285687786	1.24085021097626	-4.7895353602244	0.349396442119119	1.03829882743624	1.20485149705942	0.409627375882592	2.39811720274828	1.96704642598907	1.78064225498844	1.53534855408431	1.27623939817229	2.14963316547432	1.89559486267147	0.824069720103331	0.611686377583268	0.0452107506360674	0.383648236077773
ENSG00000011275	4.97776822533529	4.61817792847946	4.79592483025409	4.67523914977712	4.64072270099603	4.66499057157701	4.67844659836708	4.13039847063153	4.19925129362208	4.15540878826479	4.07733994153236	4.4141396869455	4.25271466491211	4.39568786413839	4.91514211944166	5.02085950811599	4.96577012230567	4.7555302630202	5.35113604809463	5.0210524794869	4.73322913530494	4.57712579254345	4.42597112729572	4.99484817170526	4.64552157602643	4.62371728880747	4.31295159843601	4.15691497163605	0.00274886583509057	0.0623517471119383	0.00608656753067935	0.19958069769199
ENSG00000011304	8.80635806362552	8.68303735926654	8.8262176059856	8.72986049013417	8.80705719686713	8.60309068936711	8.72938288835823	8.72205843789644	8.55171074919202	8.29234774397069	9.03423875585893	8.69791155601704	8.94596865205674	9.01713630161026	7.58385280428279	7.65468027356475	8.14049654494676	7.86749218355831	7.69751508845599	7.89065384858309	7.46302168578331	8.14183773106186	8.1063098973758	8.205995863308	7.88690587560903	7.86576940179393	8.71392648934718	8.71897249293712	0.824190382963333	0.711950635749057	0.0254572731334205	0.752570267093921
ENSG00000011332	1.39828294223049	1.0768524754161	1.30818115596777	1.22179894455464	1.47578466496484	1.33308360205721	1.49440737056715	0.637420826899281	0.708949871727276	0.693158588257455	1.60735335200384	0.67246839909625	1.70311751322789	1.27026862529373	0.668593778702143	0.184626391560178	1.22547356859541	2.96827648667235	1.46001542613277	1.26047625888385	1.15410665493866	-0.758784287803527	-0.393008215169315	-0.18052308891506	-0.671732291970946	-0.252288165358128	1.35459566960128	1.52225785446672	0.621649992690002	0.837092063053737	0.00901695100946307	0.0945762080946923
ENSG00000011347	1.62668540062434	1.85127428748505	1.86681402482093	2.0046536712329	1.75970903588334	1.39964897067903	1.85952235289798	2.0066865376682	1.43674260952721	1.80696953818944	2.277704770035	2.50490084379021	1.31427487182748	1.97190407890702	-2.55294651248578	-0.924730240182308	-3.13754475346682	1.06924475375509	-3.68752491034814	-3.55012100217586	-1.62802295776436	-5.14117302861889	-5.2543999980265	-4.14679013916064	-0.0439231051114966	-0.417540136486252	-4.70428537220526	-3.98701460596735	0.402473184773916	0.198326699455359	0.628314211127496	0.062039610899166
ENSG00000011376	5.16850037025651	4.83886879869305	4.71147569816128	4.61055981356906	4.80368029408351	4.39976400748911	4.58803527682785	4.58898202718662	4.40992766770784	4.17385527943612	4.39347391395919	4.57207456106477	4.94581948054626	4.93947907639179	3.4190564206752	3.29208874376648	3.65631523479624	3.72686889820892	3.50623525961544	3.42508575437454	2.89129038273483	3.25209582295584	3.36985974256083	3.97253522315054	2.78912988465919	2.93790129852369	4.72846053435475	4.21767214950015	0.503026128975038	0.607168709530928	0.88091657108077	0.305069997251546
ENSG00000011405	4.26024242982556	3.73474490354424	3.49664521759874	3.36726407686113	3.66446992089903	3.57293091480996	3.74983857345536	4.28832810124052	4.42612969107948	4.32580861650752	4.54951904446047	4.68096934542926	5.00005106030438	4.92958382017595	3.68080656829371	3.4321336510864	3.43853531204524	3.42589573889979	4.33287027860396	3.64563894737632	3.58045872181558	3.50505679857923	3.67761651441421	4.2099035818	3.90553492357723	3.66446093115219	2.9995147820778	2.81085065880644	0.00056434247972272	0.0174525936023593	0.940178085015135	0.797107264069448
ENSG00000011422	2.86953934012578	3.1936215273789	3.08218128732254	3.28183848320904	3.4350036337684	3.138827462453	2.81796782074477	3.25738077119955	2.72779025518531	3.53520965275433	2.99411410431629	2.7815072393578	2.76304195829063	2.42276405863748	3.91823883244686	4.01621719529568	4.24930407990879	3.90177549832784	4.55584251836697	4.2155638129983	4.80097463233731	1.09867794786069	0.566317840272728	2.28370342171683	4.83453840515504	4.65556868727093	0.743586232280376	0.446315852006967	0.506266554966701	0.676745692300252	2.90609843370042e-06	0.120496581571954
ENSG00000011426	4.93750881929947	5.20596336253034	5.1342764430091	4.86697777879967	5.08031160614256	5.06595449713167	4.96769108654541	4.91731688923787	4.92352283514511	5.04441641482762	5.03913821280083	5.29092099288504	5.31453357449704	5.19527046586233	4.81146195217717	3.05487382150786	5.60037348632925	5.91250508908607	5.90118443487677	5.5030775599843	4.77303488274864	3.27839247428087	3.25281651469615	3.85884850031446	4.03557208801589	3.23044791803999	3.89800698173334	3.711846841427	0.861414465591547	0.8829670298327	0.000379264487847916	0.0365444989597411
ENSG00000011451	2.01671184282203	2.40810342654044	2.24167744311329	2.29310220904493	2.17954122623053	2.28385469645073	2.2772003329153	1.57297168432547	1.85681494062921	1.84232602849101	1.98178970880972	1.64808070931139	2.16779771070633	2.13666479923061	2.23519500732245	2.44241223542423	1.73594649359991	2.51718746822722	2.32987078565265	2.48426955005291	2.19241210045702	1.33173820406434	1.08325338570588	1.8644625904043	2.73381641785103	2.87771022250294	1.18242427657304	1.53726717975766	0.0455078106020107	0.176368516663375	0.217971483569886	0.0825468133735987
ENSG00000011454	3.14433423023983	2.7974406850749	2.67775848602631	2.68705283027979	2.92597536381552	2.74136583908748	2.87707284426061	2.89827326124342	2.96720998339711	2.91502856997409	3.27422867095202	3.45993699233132	2.93482393755285	3.17527938240385	4.67328202172173	4.37074794329702	4.49494858273851	3.85416776331331	4.61954354683293	4.02196502952885	4.06551897408648	2.99176789177508	2.83456386758168	2.98616836708397	4.91227610951163	4.48758380433419	3.1590197347467	2.82956773325115	0.0530697223409875	0.0459274079540937	0.00202628025760361	0.0910593052892905
ENSG00000011465	-7.24986926445355	-7.42479929727967	-7.3800250127585	-7.23006371067567	-7.20862118038457	-7.77285605634546	-7.38214794971072	-7.94172994778496	-7.67458650046894	-7.6494926988514	-7.47092740023497	-7.8764609306265	-7.64070276401691	-7.35628730578935	11.2939926180499	11.0629023319075	11.1485260359902	9.06097308702948	8.08549864351504	9.23966800112936	8.41035038916896	-2.81458705243032	-3.09967470057573	-1.83276666185524	11.6334163350692	11.9102669118257	0.200636794479702	-0.303211473370336	0.950218549782626	0.970828199195259	7.91849320763926e-06	0.00998244607002383
ENSG00000011478	3.93893643541011	3.68132531466586	3.77920506085212	4.08378155528729	4.16877138600703	3.96221705108157	4.17946458956397	4.33207569343731	4.29780190587535	3.90998840767906	4.10402316613414	3.59800441914085	3.49079226367576	4.10498607190412	2.61519622963447	3.32914965714876	3.98284945306166	3.7649196866538	3.34881211521322	3.14499395269075	3.0863912281423	4.24056812894187	4.56114341213016	4.77504285176403	3.10188442732398	3.16999685696727	3.79499557072823	3.80427820422581	0.912230116987535	0.816772521009735	0.190861241455233	0.827093009787937
ENSG00000011485	5.17956000153464	5.11072508162921	5.31272916415328	5.37631638851642	5.3376422893308	5.52314663159077	5.27797947628107	5.01527360544694	4.94698688961007	4.93887247245382	4.88489563646209	4.77049079259965	4.7320455213907	4.83687615604463	4.49478566864411	4.16470726135352	4.02219834857501	5.02141808282598	4.56741490152613	4.62640565570364	4.51466379659973	4.03310051967851	4.23404871577876	4.42096048738644	4.83558150200025	5.05709024869913	4.74462661545832	4.74638993549085	0.00901087854342499	0.0751910474708541	0.223405386282996	0.100864831553695
ENSG00000011523	3.42714305835835	3.05745988554542	3.34061049771482	3.17547165413047	3.4770026939665	3.20517808072042	3.3457807572072	2.6679624065158	2.77780154076565	2.56040079636435	3.13656046567752	2.82772036466511	3.09409532846964	3.47505152781404	2.03578361538821	2.09060136839066	2.99438297913719	1.99076248773652	1.99230274795471	2.02829923547905	1.62862026968331	1.90402538711592	1.57333322630463	2.00000522069022	2.40616388878094	2.70662635380125	1.3277627006425	0.92187724107571	0.0916247671387645	0.381184341288603	0.951998407390476	0.315946303270519
ENSG00000011566	4.35823666369655	3.75346487622734	3.6102064774141	3.88877443477418	3.80864896615183	3.46391091043837	3.94513100135231	4.10911565795102	3.99468984528248	3.53220212341343	4.3971405925164	4.24058229388208	4.11184024845281	4.13978836010411	3.92547357157934	3.81263307483424	3.32735478354848	3.42807158793992	2.93148391261071	3.58424287846701	2.64877404353632	1.13696022477716	1.29429398366949	1.21394542142061	3.36276191150709	3.1288884549313	1.27752891268624	1.05083709090293	0.111565856467656	0.12149942944231	1.0838233749222e-05	0.758107824774074
ENSG00000011590	0.651067974120467	-0.0868227486527535	0.225057409155682	0.1752089434128	-0.148257129579563	-0.16635733430514	0.0908830158680669	-1.63680252198968	-2.46252807222724	-3.53851260344799	-2.58211199918767	-3.00537048619011	-2.87004942537589	-1.39719883266118	-3.00562853174114	-4.56672078089853	-0.443395187839801	-4.42450076536844	-0.421988127653843	-4.05608226701506	-2.79694666204369	8.3591968616729	8.35325100935112	9.23856136177319	-2.09161963811672	-1.95738854593779	5.52530304554837	4.91979614023242	0.384403023466408	0.64092672217327	0.0473855240386801	0.911192338731716
ENSG00000011638	6.11481613558302	5.9350255288382	6.02269406615296	6.14333720551211	5.31310155607707	6.17145923203514	5.99959344768629	4.7486283837806	5.0995124188578	5.01745793583649	4.66675420106724	4.80990268250931	3.80949606635722	4.4446137552495	5.86392417291457	5.72590073958436	5.92834985822003	5.65751813282119	4.26184732062609	5.39546852611576	5.77639934879054	5.03358945410942	4.6061003668101	4.72614510208695	4.97840091477857	4.77398466808541	2.99412744548675	3.59261056796648	0.000996052404704208	0.0437192646043873	0.0088117266084523	0.355949848777702
ENSG00000011677	3.09124364712317	2.89238644495151	2.4093486681945	2.32879273370414	2.5032187695943	1.15681458104754	1.73177911875872	0.315149134560087	-0.00750707174069465	-0.75245027414045	1.2567168520983	0.974091867760711	0.874955524871733	0.93772258331435	-3.45900390383415	-3.38149882250717	-2.37429589541126	-3.30261197011805	-3.02460025750271	-4.38300317077943	-3.3015743189499	-4.21563776223374	-4.30918229491091	-3.01662284296765	-1.42297964658554	-3.66765090473622	-3.84596733490517	-3.17208941451579	0.000601688167537517	0.100072895774206	0.823541891004612	0.638793572098104
ENSG00000012061	5.31036265356813	5.25266675759371	5.48318643599796	5.64656022896587	5.50710672803682	5.74066202331458	5.51795452361656	5.14280876575431	5.2281481699239	5.40246179483101	4.99365892685435	4.85188919977035	5.1033349394826	5.03908075511204	5.47927416420803	5.46568692961802	5.24749979809272	5.68430857902542	5.13013247384871	5.54284215781316	5.4657331168404	4.22610048281814	4.53658860801621	4.44358731820622	5.14778592256767	5.33378290490115	4.82491446888413	4.76399996936309	0.0021728866815275	0.010429236313935	0.000142470065862739	0.437669476074761
ENSG00000012124	-3.55584517673464	-3.91863694956904	-3.82773260311758	-5.22838611443163	-3.74092743369664	-4.57072802808772	-5.58838636426373	-3.77547993706094	-3.9450943205884	-2.22221907161075	-3.20400789041984	-3.66015236521311	-3.61300745374271	-1.64467918234728	-3.40919374537437	-1.0275220322976	1.32866618050038	-1.66414808861167	1.28030846193547	-0.120023184925515	-3.23614304151952	10.8725571390436	10.420936899335	11.7911891437492	-0.532625297698711	-1.28575024817651	9.81944993595728	9.65171075481968	0.603301626673291	0.825386037992895	0.000215753099255388	0.990857525550229
ENSG00000012174	1.99378444085251	1.92631467369669	1.63035731253348	1.5715400258854	1.82630686538004	1.31725359971164	1.63890411043102	1.98617447845239	1.79075691201773	1.46574670643015	2.35545784986979	2.12802355015656	2.29583808772694	2.43897528620459	3.71937812015818	3.5550147964834	3.76688730839314	3.53669130438567	3.75179342188711	3.67325468695756	3.50058437773665	2.39391985707124	2.31716930391307	2.99360964417412	3.76933088759693	3.54849097529155	2.49341704260013	2.53269648392205	0.0384247247138115	0.0854761301955037	0.000526758926025342	0.957659254010039
ENSG00000012211	2.17711326398602	1.78278974883051	1.72239466292159	2.21602091813424	1.39582277830916	2.22621549041527	1.88387784926821	2.20932980054075	2.17494454061441	2.45670859107784	2.07854087165232	2.03776987289702	1.67468542002612	1.90456165937655	1.75452656328342	2.46296167201407	3.02631868044539	2.31119909453132	2.44853598812563	2.16297490406398	2.16142648538325	3.64198154202775	3.79349897093641	3.15710032893447	2.33466873106423	2.24874157608832	3.08544464140506	3.11683571867457	0.699758258193835	0.852675767264618	0.0479622766943555	0.977618726689728
ENSG00000012232	4.62833695412103	4.73299720853788	4.61209795476335	4.72974622766245	4.60301915695719	4.66862788256343	4.69452620094984	4.71198385038473	4.63212731737904	4.94915670533645	4.95919625510224	4.80218877891258	5.40573669617677	4.70234952601748	3.88673146744049	3.79818289947015	4.14849813369362	4.05872048393456	4.09527331201516	3.85204529654838	3.99774767420773	1.98611878092448	1.78363291754475	2.3775821948445	3.8721377409181	3.73143336428972	2.41636391358327	2.37466810679791	0.13916983314003	0.393971996776489	1.4055989442061e-07	0.555703464584135
ENSG00000012660	6.03186060577335	5.46818502955621	5.54278282678665	5.5063523557126	5.61271736168043	5.42043037303137	5.46764300414428	5.83118364609952	5.79066762486083	5.37174221130414	6.01446063582104	6.22094793270666	5.83385969116583	5.88231769975252	5.40811608889752	5.28185242200732	4.95640910620556	5.35534934981515	5.73583282373696	5.70250855470856	6.09110766000395	5.20722997935239	5.14754202473333	5.70070281086932	5.65869167910125	5.30509332194277	5.03442448576815	5.0845338855365	0.0603476933222033	0.0649416432191434	0.442009929382422	0.958157685752302
ENSG00000012779	-3.33357401919377	-3.9176984021659	-1.81331300291588	-2.26292230419303	-2.61699251691605	-1.48097236803624	-1.76529938692202	-0.167723216607118	-0.449508071910029	1.04554750213231	-0.662646105743621	-0.343708458985083	-1.32511931465382	-1.33491841482254	-3.52428767559638	-3.5059113227159	-2.54886876675539	-3.35726913636184	-0.72777790499005	-4.58973815338246	-2.08671850880432	7.12903917109088	7.233779119978	8.24553572995547	-2.61384767116641	-5.28016908314874	6.96536375649979	6.5989554765558	0.0724674406203844	0.250514017806197	0.000190794575579552	0.713785325958188
ENSG00000012822	1.87168223843871	1.94086123382732	1.62255182738623	1.85138440466503	1.85465632465513	2.08423917927991	1.81793035946788	2.28928733635651	2.12003532485951	2.59457858745529	2.22616664488724	2.08438230444269	2.42230939798339	2.07843675652597	5.25160813426492	5.56414586709374	5.52279344158752	5.35379157565728	5.07292926901955	5.29073839699291	5.75641563489922	4.6001329637577	4.5134561431559	4.46715020036682	5.87519213936823	6.05258309438346	3.16533771185684	3.1114507434407	0.337084021256071	0.691141142459386	0.059133899663311	0.142491695588705
ENSG00000012963	4.98782173679028	4.98407050107968	4.98893828484937	5.0523144434074	5.01017893262706	4.95670363043683	4.96069241249899	4.42941647107897	4.35785040416948	4.35605189710513	4.54870139989498	4.20850855267338	4.21782147253436	4.28708751819985	3.91258304168273	3.45396614180015	4.20319039958872	4.48246378573466	4.08505548520815	4.06135835103277	4.19736470893115	5.39064193226581	5.94157048904701	4.63105683103488	3.60315264782791	3.52905728884335	5.48527624119741	5.35483328384575	0.0020750847677958	0.0539502776222939	0.0456144036926973	0.218415215614199
ENSG00000012983	3.35166792958206	3.58167423452336	3.4894980876904	3.32152764775827	3.20663066311801	3.41494397210277	3.39412097605327	4.05437539388669	3.89743101804462	4.04020078565953	3.75631563187682	3.91963573991458	3.89286520796086	3.77829575358645	6.16995727563383	5.92745724720355	5.73695341488486	5.59428344090828	6.09803614702974	6.02931599811112	5.22046725504974	3.42752692461263	3.55261385805887	3.97682322769107	5.40050055152687	5.20878786899683	3.28850237481664	3.19375999200788	0.011633579024367	0.14954503702169	8.54437202767061e-10	0.0473867238489001
ENSG00000013016	3.0541220390593	3.01922164399936	3.14161275840561	3.10208343181856	3.04315633677885	2.88612039532393	2.79549826686094	2.73892056668853	2.9222625739172	2.91119324595491	3.00851651617825	2.75009234571811	3.09617496570934	2.78202799029783	3.57438540388017	3.13944715464263	2.39991073726975	2.24137669906598	2.33452831632956	2.32434578989078	0.844489392635976	-3.42252783464796	-2.47783598988191	0.48931244252451	4.59695567423615	3.34363237838676	1.76520978177466	-0.750195322630463	0.810018998634972	0.88909830264688	0.0555899733116666	0.0131972082533969
ENSG00000013275	7.32560721224087	7.17921116116439	7.38573706072687	7.21435959259711	7.31682315859818	7.53718119154677	7.28444058210021	6.94977795709691	7.00942716165749	6.82416206836265	6.9380375807348	6.43043364062024	7.17473752251713	7.29110302188096	6.33778257178375	6.48651139927033	6.50420114388468	6.69442331714935	6.51675693038167	6.40652932759063	6.47573974476879	6.41528877793537	6.55867897177305	6.30882933474915	6.20563693929307	6.42069570981818	7.10147122685482	6.98484075154524	0.00384342940809602	0.00942134108688382	0.999592370722129	0.571929095766724
ENSG00000013288	0.148025729841049	1.08463511673414	0.508157894108116	0.465037290673572	0.327163322559024	1.26451888189124	0.884597724581449	0.779658429687062	1.11529499999264	1.31012518017638	1.24704515962099	1.25375333486805	0.46956417419804	0.503701519162465	4.74104451735193	5.39495839503124	4.07453910177111	3.7737487053063	4.22593432470851	4.75039808506561	4.96157533689751	2.77636696178878	2.91140579284246	3.43520863217618	5.48363778967042	5.82143797991386	3.48283527244077	3.14464752055247	0.590732060685267	0.582989134850548	0.414378198899413	0.00238675964329704
ENSG00000013293	-5.15204374282373	-4.3814142075883	-3.90682295770947	-3.70935259301355	-3.86290950483927	-6.40308512123814	-4.52694451849492	-2.99984804674087	-1.34018485882561	-1.1093188829442	-1.29919301598828	-2.43218703676021	-1.09771127897133	-2.33879966400069	1.75996192305297	0.69943535238568	-3.63061255877985	-2.27297110802325	-4.31894987306958	-2.19067275232365	-2.28002508415912	-5.42364586679216	-5.51156740486146	-4.14399524441867	3.45724617739528	2.73353730601512	-5.08100869313443	-4.42052168794147	0.0115750275491821	0.0930519146085053	0.262229458904259	8.17359877506373e-07
ENSG00000013297	2.33429794078471	2.36581699855013	1.48302070698761	2.38117869118406	2.03070590773292	2.31751714139411	2.36939533670322	0.862959976920252	1.94033240768903	1.51807519082582	0.806449821052477	0.806204681365752	-0.131688080347049	-0.255482963729041	5.7772274799429	4.97365535560966	5.91221147227338	4.22250028932303	2.61517754132467	3.83962520949072	2.56642632532286	-2.74990978867974	-3.3457026587432	-2.48164148584096	7.39685628594859	7.49434634028959	-3.20301165312034	-2.83926845737251	0.115321475728385	0.406979636522811	0.0180415733400782	3.31004624048022e-05
ENSG00000013306	7.42224198628598	7.41081165324441	7.52085936546102	7.64371292477621	7.54477999205397	7.83965171838671	7.60745749553245	7.74605969576785	7.72281087682925	7.74373475313686	7.71234095262925	7.589702779328	7.35513362834736	7.70972139133815	6.51096077704045	6.64754992105179	6.34649528310718	6.60577120284825	6.51627364260731	6.76419186620024	6.85364539033612	6.59556342769559	6.89264705302862	7.3494134226257	6.38648504252502	6.48822783520186	7.46613546662198	7.42930943007967	0.658298500807173	0.820479992981344	0.281290364754264	0.609419139431078
ENSG00000013364	3.57962886126641	3.26652528071464	3.53301888440624	3.62798273196601	3.46390362671068	3.51964125460114	3.44000053990347	2.66096334625802	2.80410761141603	2.7586656911232	1.99312447542251	2.54161654920721	-0.15608425414381	0.76415654643937	7.02134069655187	7.4577371094355	7.410057040294	7.00737497651738	7.71022559305425	7.11420693408545	7.3914560431878	6.77197354117193	6.33921346130223	6.18483856499422	7.88830329385642	8.18797835964826	6.23755286621846	5.96218461972521	0.0011117316826336	0.091039624123175	0.574236103331129	0.0427837168829428
ENSG00000013374	4.09866657737523	4.3007095927519	4.32730864695149	4.32049136237055	4.37080161822925	4.34342382860946	4.35167106146326	3.82984988271178	3.86728600110533	3.99016343991201	3.97569225191546	4.0714001384425	3.99836291032087	3.94427042655096	4.73308500257679	4.75872697124854	4.69867330709275	4.77984826324512	4.83260418093299	4.57853337211402	5.37771475838149	5.41953535321293	5.30414982862994	4.25553060169123	4.96570718497042	4.95354873207505	4.80166770221995	5.22370035919775	0.104678806435877	0.438416146483656	0.346060650397131	0.706860187197034
ENSG00000013375	3.90815158432599	3.77698103910737	3.64084961293792	3.69020507728524	3.6199908740417	3.77170797158513	3.61474425102844	3.71305414101215	4.01046415955023	3.77325359418928	3.62375786595094	3.86144182552249	3.93409129991201	3.73795931065959	4.91261006361347	4.69770215822302	4.80222088983828	4.7198227413072	5.1529575510451	4.94167286506893	4.87492768960877	3.36564445752884	3.41373255369265	3.20697193264115	4.61039514868004	4.45283973997281	2.75736456571177	2.80363030332735	0.655473597659924	0.93396381593119	3.66235265940144e-09	0.112053985147149
ENSG00000013392	1.14230924542188	1.32407141490709	1.64035370107023	1.67940040843473	1.42960040077602	1.62278899724565	1.87641327347931	2.30126408034457	2.49921354935841	2.32068633972084	2.06174336524144	1.99540343721379	2.05570437813705	1.90308770840954	1.85026731184356	1.65494645399633	1.59972417163458	1.80916487951688	2.51513207050938	1.58153836152432	2.17320816706356	2.76342363825982	2.67435311726038	2.47057345929532	2.47296410126693	2.19121380490941	2.04505367521683	1.86557790369525	0.0206636654948029	0.227556797991235	0.0175941313674523	0.225992293428333
ENSG00000013441	4.15411032552389	3.30604789269463	3.49094553783533	3.1829761233257	3.47377650827197	3.25049658284002	3.54371684478235	2.68038763458044	2.80137863577187	2.72482169389035	3.4713728929431	3.4493502851211	2.96194638629816	2.58548956088842	4.27155843751475	4.34283834734759	3.86339505503182	3.93471671054894	3.7688305694917	4.05111985192952	4.46409584645936	5.33702379651315	5.20764774060803	5.94646924844707	4.34485703175189	4.16792515089785	5.12233350642584	5.19546768441429	0.0878642518591419	0.966648868982487	0.000275030327509796	0.690706269770572
ENSG00000013503	2.69515735210839	2.42856605305418	2.71507633904089	2.23569648557311	2.47209346340181	2.16585614571644	2.53677866008213	2.23942896229823	1.83680921498078	1.7436776965128	2.59508546913282	2.32793399795917	3.11983308429245	3.05976550065157	2.12167836211724	2.37704784986888	1.94121977608435	2.01269588922348	1.90638396966684	2.54793318088008	2.04858647022974	0.756338000209281	0.866606147536367	0.465109307970215	1.87295896467654	1.98683747465361	2.73892351142139	2.4154748689233	0.954068365859803	0.993244427273662	0.154479046587054	0.788874999437885
ENSG00000013523	4.10156898329554	3.69132012319096	3.89318929379072	4.02245559669104	4.17844054351409	3.70229524397322	3.73696947615038	3.3525094485226	3.52813561726739	3.05288724634025	3.68229177972647	3.77008907307559	3.71433185280499	3.92250847211355	2.34460944999947	2.54318088663307	2.32631818729505	1.89241151674783	2.95280170340071	2.25532028081633	2.2058925513611	2.53818647914394	2.65447955668452	3.55502876432439	2.54027544812915	2.41126732449393	2.88980689635312	2.69869156395868	0.169088549077175	0.665345733295289	0.163560535653851	0.817762865570291
ENSG00000013561	2.80357043617752	2.53896925361787	2.07727672258601	1.87309805593555	2.21534880203364	1.27760485890558	2.01188859821891	3.0497052908806	2.80214720640574	3.21833003020681	3.04400075157979	3.14516887438656	3.30487157137969	3.48348436212406	4.99151521735044	4.8699660774356	4.91580579410997	4.66966225616039	5.47722034606516	5.03375206894981	4.65954184664041	3.94388579756205	3.66638537788966	3.62285184882758	4.43126767139348	4.19332056758167	3.69992664142049	3.27823162626314	0.00174504021671365	0.0337050855897142	7.39574702376798e-06	0.0534115372945441
ENSG00000013563	0.746786701103369	1.51168969554285	0.690475186166149	1.07211931777092	1.07662715973171	1.31004653103475	1.14555502110653	1.69086956884966	1.47528962440095	1.57979264043498	1.37093160019165	1.43118110110861	1.32051013019449	1.19785070929947	3.0689012770612	3.17953505955184	2.28273814972597	3.15829378114032	3.12044771308567	3.29656349157633	3.37802546856524	3.6090461096872	3.57699386104846	3.16242003533718	2.99542341946747	2.87487095330136	2.79358215175091	2.49368068762426	0.421167982514219	0.690936764726143	0.9246847601116	0.78211756890806
ENSG00000013583	4.70984001203435	4.86770945795728	4.8224001862217	5.20715667201557	5.04700026374245	5.46434619289091	4.81968532492259	4.40640961749819	4.377371795803	4.28682623056163	3.95651851809302	4.08128952847925	2.7423479037256	3.49457600480321	4.67026000106621	5.05430926387611	4.90087852243922	4.4746974331732	4.29662471421254	4.436753109389	5.13998853917988	-0.243377627575829	-1.77027817237602	-7.59605563236188	4.95229833710473	5.06419316838395	-1.3927855841593	-1.03160851950783	0.00327125828548461	0.0880506300358233	1.31934961024118e-06	0.638683942062315
ENSG00000013588	-2.77289904302613	-3.08525751080768	-1.31936005819777	-1.75288979308191	-3.74639601631469	-2.57862858519822	-2.0596588040321	-3.27363769836154	-5.29374157419693	-2.65401884550333	-3.46774624267362	-3.91016500463527	-2.5412925359434	-3.95204694090444	2.86418113894479	1.89830854008972	4.75903470746407	4.90663944281015	2.59016095027772	1.04418426887156	5.09257548336449	1.74337171883198	0.996815764659871	2.9410918972048	1.63323708297187	2.32298392258527	-4.89795315692347	-4.18176258350613	0.705090087970224	0.834072722859887	0.0269478350829896	0.573746117915498
ENSG00000013619	-4.0848184324161	-2.65905954346357	-5.07651788745601	-6.48067733986341	-6.5643703604851	-4.19163034199376	-5.23141163968872	-5.4328921398663	-3.74510330015638	-2.19381204210068	-5.61165419203782	-3.73959574159777	-2.29338039289121	-3.08060703084563	4.6260079554155	3.84611675232377	5.68030220149218	6.01159339746623	4.09067291936606	3.85152746259854	2.411576686482	-5.67068532368968	-5.77747938557809	-4.62473099876503	6.03106234111263	5.69994993066377	-2.44399376232888	-1.73986153296082	0.735566515766204	0.967971521188984	0.000261037502547788	0.0230086253326773
ENSG00000013725	-1.40566003433929	-1.19041941591412	-1.20786608904097	-1.05679393445186	-1.45377116753876	-1.61630548698507	-2.52507679673356	-5.2165326663534	-4.87573786456931	-6.82516430632499	-5.73392201940539	-3.89030841875465	-7.86740666584107	-5.11664110576969	-4.93652553595963	-4.84989252525423	-2.24235112253805	-4.78261352279014	-4.50609510683043	-5.8441901750246	-3.20264062368173	2.55011849647965	2.72296408359089	4.81143544677112	-5.22763853944711	-5.15962867947771	1.5854008367665	1.60773915224923	0.0200857925071451	0.272642025636317	0.0497724849922837	0.839956735060223
ENSG00000013810	6.87485067596543	7.01396962536772	7.15734191309343	7.16087827870103	6.99161315015947	7.39571570157721	7.1872058206831	7.01167341263406	7.4335653707297	7.15792746533814	6.77999397602694	6.81273216185264	6.54953523183942	6.9181078959582	3.8701405549608	2.57271149898645	4.41452651800631	4.99774437762334	3.97515987338819	4.45493693028296	3.77373286192173	5.9534061814628	6.20482748773331	6.29019178489583	3.67281113774551	3.08761772434207	6.78409204908438	6.70022291603319	0.431677977578087	0.482306950235986	0.0177284881573933	0.392446396725135
ENSG00000014123	2.91481099357626	3.21556580183447	3.05299069574977	2.92205403735102	3.03601793864887	3.10420180525582	2.9557144101138	3.8450879645361	3.66951820051152	4.07849781014487	3.56349623041415	3.70967903584419	3.77033707518491	3.47579604269337	4.59992151927217	4.39702856550928	4.78453570455047	4.47547431588811	4.89686087745355	4.50156085005595	4.48971168215866	5.12506277068555	5.12543836039234	4.64179211355524	4.43816657203388	4.1793264964369	4.45429154560221	4.32474561806158	0.000767596330068138	0.0381095157414816	0.729167644565562	0.350306951098821
ENSG00000014138	4.4516826758772	4.6460474919779	4.80443447814505	4.29072262085289	4.47432416334089	4.30907898800772	4.63923239820422	3.59790239976805	3.50879864215046	3.44518422238846	3.89081053014688	3.8195103370882	4.04607542683609	4.18942827038815	2.1805736405848	1.4640570825184	2.41746281651803	3.18291278130222	2.3823771079972	2.98926264868974	2.55016148769606	3.66832215865686	3.71978800086731	4.07805769727477	2.12380258813758	1.43151986790022	4.91194853499253	4.70141911649097	0.00945097144898799	0.134878420803026	0.170038991975605	0.366716208529119
ENSG00000014164	3.69475920365449	3.72441137496275	3.86215708967091	3.79282587622758	3.91707039876721	4.06224906774543	3.84406480578412	3.67488654757841	3.88485022116623	3.85599192196999	3.71377877685796	3.30902677575348	3.57560188766319	3.79910509978185	2.3695860392598	2.72416412309857	2.20235435501784	2.75643668346173	2.5720844307249	2.51984821280584	2.50163745719672	3.42221103862119	3.31506239836836	3.59084507603476	2.72037133939357	3.11758686540375	3.05566522163621	3.19647435157246	0.110014422022177	0.120380116747397	0.000543285225778935	0.183549032516661
ENSG00000014216	5.68018905112866	5.669812106328	5.71904827879942	5.60683302140118	5.46233770885717	5.587710349033	5.54040089703969	5.41081193282619	5.35382542863404	5.63003298855353	5.544587601326	5.47166329064025	5.23642525049572	5.51877478721657	5.90024707809218	5.89114177429772	5.7250977098865	6.36268162934332	5.9265700249861	5.68224518628642	5.66317174831718	5.75373672560806	5.85874624635693	5.38414693961955	5.93864981645005	6.08597380075519	6.23244499653043	6.20343320573088	0.408474146385053	0.762404704637996	0.65432943686101	0.665951959530442
ENSG00000014641	7.31490003360498	7.14936107574719	7.48063645414963	7.61837211459883	7.55481541220244	7.63678560508637	7.62346687877601	6.88986205072634	6.39479452466379	6.59322125792942	6.52082359783671	6.77817361989536	6.13508377814543	6.23637144647247	5.99866268289177	5.94785006177141	6.42491146602216	6.28162835560598	6.48864982659364	5.95694312544216	6.2750958096328	6.61143789575352	6.36175274700027	6.80468932672612	5.82343361466845	6.0107303249052	6.89074519892494	6.2900827200918	4.26922318220451e-06	0.00256209778533964	0.709684615290207	0.378638623005723
ENSG00000014824	5.251410211763	5.30574545875331	5.43870995464057	5.35064772647951	5.41195428052638	5.31326371914886	5.38554921007506	5.40653121437701	5.24631535164037	5.39641507647883	5.30793540891512	5.37757618677168	5.0702442675188	5.3262054855041	5.59096231703052	5.3590917048214	5.79615560495615	5.5771640204341	5.83680572143671	5.48507291332874	5.37418757214028	5.1167735156977	5.16893937649718	4.99756278189687	5.39913755892276	5.17994327647212	4.96726596804206	4.96637985017221	0.792494464917954	0.978825739138832	0.000211433426564705	0.111826845406581
ENSG00000014914	1.54529682548528	1.79173335583863	1.58941914955019	1.79645617359033	1.95401983289385	1.92205938829782	1.9549582016	1.12102551553692	1.0078829260889	2.24394107869364	1.02999738178284	0.976074149743934	1.24828124040668	1.03632658837436	3.23006846808972	2.83910061891169	3.25105117877294	3.17313991451692	3.21947733880416	2.98164647704232	3.33552615010553	-0.882164880659349	-0.511632583428159	-0.440548493602003	3.05314194182881	3.15547161257176	-2.1388904929476	-1.06973920176152	0.0122869893779106	0.0623270877633275	3.2843983684619e-10	0.940505815469869
ENSG00000014919	4.34058146163304	4.14109178279634	4.43082919499665	4.47621764511679	4.52192524502336	4.30802797207956	4.34623471528857	4.19163139798842	4.109184437598	3.82168275881676	3.93565615851969	4.24708964478328	4.19471129942127	4.46003874583261	3.85590543791275	3.94509156552572	3.79886622293763	4.24313620078373	3.96339068677832	3.87349892937149	3.96712296033259	4.69537034849118	4.55201553858077	4.51047999535094	3.48801975191056	3.58705914447399	4.8638104592714	4.67676166684323	0.0683371809464752	0.2205866955927	0.256766554542266	0.0916441095352634
ENSG00000015133	3.56550785789541	3.72066187929655	3.48662390838526	3.42062601948169	3.43574662543285	3.18955309774176	3.54344065264415	3.39103866659674	3.76091233670904	3.26213292207001	3.96514326944907	3.56103456985261	3.76831687842532	3.71651163047194	-5.38888609025323	-4.70055297330108	-5.27276537644928	-4.92618149112527	-5.92070332526247	-5.12817796742662	-5.25451941563602	4.12843133676362	4.34810494401105	3.98552252131563	-7.92760598951102	-6.20776697510051	4.0753355040234	4.23888198781038	0.173892528315688	0.213959089270724	2.25435899356446e-07	0.085093960283747
ENSG00000015153	-2.62120423316492	-3.59182618623099	-2.99727772147298	-4.21040064500047	-1.19115656666609	-3.02996635204331	-1.21493002017306	-4.68480114945172	-2.85161848841743	-2.77943849202817	-2.9163263433843	-2.57076616689449	-3.08161573565765	-3.24087717446522	1.69426854480899	1.706497763359	1.57399758576602	2.18825887851224	2.92506589563201	2.30673892727753	1.95170690261365	1.96302854527286	1.84323422904316	1.52390420510755	1.47807115589017	1.4940786532577	2.2096449212472	2.27672235288325	0.717663469990467	0.988129394758843	0.162183744626416	0.245938309840323
ENSG00000015171	4.12752401762401	3.70726616459295	3.53178007860856	3.56243493159058	3.55501143840001	3.52268259725432	3.72310595279196	3.59619981239328	3.32905054679525	3.6413160590892	3.60904935300668	3.77488588501854	4.412148231754	3.77101507516833	5.66918608607192	5.59040101171656	4.68641404568883	5.28427712510185	5.28269759458798	5.52066724589753	5.41963788951469	2.74975773085657	2.76529575226417	2.47803040401763	5.68064933879626	5.5204680906333	3.77353398098101	3.82191709986564	0.884066028399714	0.974027321897499	3.76069288818337e-05	0.569566905904669
ENSG00000015413	3.10099151242788	3.81919307762582	2.14015922370531	4.30862954457455	1.85543392363976	2.61155392555306	1.89243446141628	1.7149616058839	1.47206320630528	1.16964909978881	2.66051798660104	1.21529229387785	1.75551282755435	2.73151666091428	-0.504390207389249	-2.01615343967762	-1.01632371951706	-1.9319306586931	-1.65321256406028	0.148625946095834	-1.92805106833062	-1.29591812122095	-2.97642351509392	-1.70939767516894	-0.058685895391291	-2.29906731010262	-0.917280920638695	0.983764472342574	0.0941074671948646	0.384548226640099	0.976058682728738	0.971937982794925
ENSG00000015475	5.10610929899599	5.08247031049087	5.06354438735434	5.01429091780947	5.04811762655809	4.92970103201183	4.83551020874656	4.15602290208959	4.53987824599186	3.66998740936413	4.33623766922004	4.1294614486796	4.12568664658894	3.88651630491152	3.4046015010596	3.44058408342192	3.7785765616307	2.66882715705531	2.54990516148349	2.60550925528531	2.31324821035652	5.10552396814065	5.43750180934936	5.82076971077115	3.15330132008332	3.49037610096868	5.56816808846025	4.89827731147827	0.000302541120245033	0.0280010282389658	2.25154971833509e-05	0.525359361205613
ENSG00000015479	6.34600228921214	6.40503985297779	6.40336936614368	6.48906995184172	6.50953814137947	6.26085362908217	6.39833296182645	6.17179854862435	6.32740341230398	6.10385679993984	6.28607859027564	6.23009946198003	6.03007919246844	6.42880115306512	5.17766947818298	5.14171516500352	5.36299858204752	5.04723256459378	5.06247293896519	5.16433079765939	5.13246023609278	5.73938214800384	5.6664466944188	5.89985403809429	5.4456364998995	5.28688316841743	5.77074147552341	5.6085997566372	0.0801764661379442	0.387396727412064	0.000144623804881373	0.22113973873056
ENSG00000015532	4.19347564473576	4.30993418833123	4.18981134982657	4.5188954663007	4.26717844390104	4.65780477242413	4.45851849978927	4.39293623054602	4.32895173176667	4.74700855123793	4.23331732705401	4.22937805780932	3.81012350742651	4.1948869014007	4.51189390772639	4.57375926838104	4.62765885660765	4.60781116784452	4.61224232280831	4.45597950927501	4.45415259332948	3.14607702164	3.22300553719351	3.70359562818294	3.91861150330763	4.00609724696498	2.55160653541933	2.76065420824372	0.586319329026171	0.707292034751991	2.62901866156877e-06	0.0632309491712465
ENSG00000015676	4.55380997447177	4.31774617491149	4.51666584719632	4.56056978305879	4.46691390995064	4.52978860023024	4.52614531493612	3.99344253477574	4.09838232824501	4.11060386591254	4.218464258924	4.35304134723378	4.19748171197275	4.48070390384155	4.74976057339137	4.65811607172101	4.90452324016094	4.98787692572269	4.83857232513554	4.93208526521391	4.94553204941372	4.73733068745414	4.60052313792976	4.95776702265306	4.64111965812626	4.6393942441311	4.64248318103101	4.64379427082327	0.0146644846916577	0.247971931424481	0.0602873270798585	0.214545844636322
ENSG00000016391	2.8776141437568	3.18409426031388	3.22376485623792	2.94124479815808	2.82790449665163	3.01012589112311	3.16616724379794	2.18903545120139	2.16626720662967	2.08521891455539	2.31646494975927	2.7272320523704	2.01167517348435	2.0192897334065	0.897785780236594	0.98588026427491	0.183903577291764	-0.114128211387565	-0.886626426096886	-0.547043935173362	-0.724756543272267	4.58025911469485	4.22153548074716	3.80906366752379	2.810105572194	2.79561634191163	3.26771914689506	2.24485067810176	0.0565455115735322	0.463657625933313	1.87003341040604e-06	0.000811765806354684
ENSG00000016402	0.807574267623474	0.700257529686776	1.29335141467242	0.150043507375831	0.746387012370183	0.110488524228786	0.715058179144617	0.424086457354449	-0.0761576738466219	-0.456078831085336	-0.405422942737595	0.0315184442499894	-0.900606305444952	-0.526391990362988	-2.97261375895512	-4.50302543348523	-0.0735091622284183	-2.81165399700912	-4.11363104314792	-3.942721911859	-2.79501346729287	-3.8961385142589	-5.58652325345321	-4.4226307760951	2.67716132200045	2.01404430233886	-3.48094892268569	-4.36470775229076	0.0618855393373744	0.329527007635592	0.000786070311765021	9.87660134823211e-09
ENSG00000016864	3.48403297061304	3.93863180536325	3.67354565778202	4.26743489679833	4.06496628052404	4.03762280747405	4.13436570652302	4.37280246026942	4.46541234110978	4.27464601657035	4.17753829181616	3.98345831764012	3.80263832348905	4.11533040912204	5.90768967923938	5.73198641489448	5.68347413857391	5.60214444384926	5.40715679788266	5.56786395422503	6.0920545548414	4.7549248088733	5.03729813879133	4.78166067897665	5.89768117200484	5.81107547573059	5.24597851417089	4.73532329206801	0.320691293344949	0.732465857646264	0.0288270922745776	0.644648016597386
ENSG00000017260	5.38907551122525	5.15831324328282	4.90011947371444	4.87567181984156	5.08958504014316	4.81478585559201	4.9569686697115	4.64528600528578	4.63687724519824	4.57759550790174	4.70265574851451	5.0136639158862	5.03323592122727	5.02627292450068	5.58476683491154	5.30703507741824	5.13218945284499	5.46591742473091	5.41558894144345	5.22747326405125	5.16123973935161	5.742246383765	5.31754412701959	5.52973298465878	5.68302722799381	5.51076832451362	5.2376974557695	5.49827864414838	0.181887022630462	0.55493843602621	0.120549313693618	0.266610435707108
ENSG00000017373	-0.472291613289369	-0.194091989247532	-0.28688001157985	-0.619046419291252	-0.611345975193072	-0.46298668145614	0.307825973923936	-1.03865102281972	-1.51750839785642	-1.12870222475437	-1.16219360070368	-0.836506203357654	-1.51623529045809	-1.49196342661594	-4.45227452627995	-4.39052091358866	-3.40967784848434	-2.70759114813002	-4.01154452289097	-2.59948778959697	-0.821538100816585	0.980096606147433	0.552304029813189	2.71984828204132	-1.93838533025986	-1.84550963119409	-2.60041309279774	-4.23029699903957	0.452016407826105	0.763699193871161	0.0676384666420161	0.604107489748018
ENSG00000017427	-7.69106148052931	-5.73958912305627	-7.96871012618589	-5.46131798279561	-6.30045483279209	-8.72605452273833	-8.15135961887136	-3.38387432010084	-4.59924451558069	-3.76359017907658	-4.68236026711282	-3.6212274490911	-4.10997632842732	-3.59101812922524	-0.984806760057595	-2.70681874638293	-4.89509385800206	-2.97201974333878	-3.17655447507334	-3.19208725005662	-2.9607822696442	3.76956021007404	4.37803423506329	4.94369775581839	-1.98447861813443	-1.89210447967654	4.49203800636086	3.06294268383411	0.0194418485361323	0.161591696263265	6.29838901444581e-05	0.587688439780766
ENSG00000017483	5.60637097359927	5.54166856640362	5.64084634502029	5.74571471070623	5.6544732953341	5.54359924667096	5.57049213522719	4.78217568781617	4.57275183940951	4.39582766380282	5.0060984979425	4.30993756123098	5.18668827666189	5.17284746345527	4.15417424074357	4.45390065527482	4.53459165595629	5.55664250338338	0.664504077811828	5.46957915062258	2.76857196944647	4.89360497554657	5.41680943652205	5.14887004144551	5.05947018905028	4.28559489509474	5.58427387413358	5.77358597355833	0.0901227364771811	0.27806126139853	0.088920648962092	0.597113124889583
ENSG00000017797	4.70298159245463	4.64668383205649	4.78116435112365	4.89844746140985	4.96146032905632	4.96692754886248	4.9000934198662	5.27888409964465	5.46763046343444	5.3239653163003	5.1884570544756	5.2233913281472	4.79015075916332	5.04144981949295	5.33546250307421	5.59026169290795	5.05888228261711	5.32978439977169	5.55952291767154	5.56489803984842	5.56320158470913	5.08271118658	5.35586059792969	5.10032822715115	5.50695697131824	5.4595296018399	4.99197137833476	4.92955754463154	0.0133118538489354	0.101874350730529	0.270336300663725	0.868800593173756
ENSG00000018189	1.81402362772442	2.05814723873263	1.88342984146112	1.91973209725896	2.18022395616456	2.02098833665591	2.18302536350373	2.75501919506655	2.64752935729485	2.75990361736629	2.55802360912768	2.8410016278008	2.10439746406253	2.46102120356838	3.21913031379147	3.08182078148188	3.41843296527055	2.2948482039545	2.69079954145832	2.84179294997518	2.53316536692829	2.30274330324218	3.0439986881246	2.12229712659194	3.10401043765307	3.16881213849912	2.55112707925973	2.48101082902159	0.00808868824961421	0.0459032929752767	0.834182638001492	0.482040622649013
ENSG00000018236	0.622387510264393	0.276183468548249	0.953577431994896	-0.0780099965283276	0.109141724818689	0.0280000684864943	0.123528280741308	0.717746145079377	0.774583191321895	-1.03582035258919	1.20376980198858	0.424940169402793	0.705027717167121	0.70764177996693	3.67054707292252	1.544062132652	3.07491581558356	-2.45213978535988	0.885019044770676	4.83851044084265	-3.76388138677805	-7.63361507064945	-7.78889271760518	-6.90085522067584	-0.850121675637528	-3.6632813270497	-7.10116273033528	-6.3204290346489	0.859104822897441	0.865854249916172	0.00272778918534457	0.354972338771087
ENSG00000018408	2.91927581740943	2.68447104252881	2.49317442338482	2.51209046703261	2.49902922686533	2.23265610767104	2.44049933938677	2.7554424495706	2.89459066841769	2.77850996239267	2.74093384207025	2.85616848349294	3.20892186628908	2.70238632918408	5.03287838678732	5.17143314970841	5.67711322895329	5.03191989029742	5.39212666130983	5.16321690233447	5.65775037453918	0.618629818744702	-0.800478501867162	0.743874662843721	4.66794943490434	4.5343166857032	-0.736246109786916	-1.74773495223171	0.21978186084235	0.546038949477599	6.23004439147436e-13	0.0223931741760401
ENSG00000018510	4.2731986252018	3.97088333518954	4.17026990797292	3.95032989575712	4.05395028752487	3.92496644582605	3.99893831143458	3.79599183912997	3.65418012794158	3.542606228992	3.82984481107514	3.79226123907316	4.18218284926115	3.97659311332629	4.04197472325941	3.80557016252246	4.22826251478721	3.78922141965496	4.35789438540408	4.04237437967935	3.7457494370561	3.51161554029908	3.46478696280072	3.53228986280384	3.93850758435329	3.60669074164124	4.17303070744916	4.2001190747217	0.218871499928032	0.461494193018708	0.160592875580195	0.49941133656483
ENSG00000018610	2.90218418249541	2.97092298471382	3.24486625009212	2.9341764902047	2.84816069633983	2.83931337564546	2.95131164356074	4.82004629934906	4.342795497916	4.01876891823247	3.85012251276527	4.00201276135404	4.84466466450558	4.60051332331307	3.209100574187	3.33712905621748	2.85884667587869	3.47271234603696	2.30481750132245	3.34541155724518	3.39267876723719	4.56338940953019	4.54536429565823	4.26271606541401	4.13822319518545	4.30716070518731	4.87749366447723	4.96812239311298	8.02569816119722e-05	0.0281273012582366	3.68878025370445e-05	0.0188302294637445
ENSG00000018625	4.46326189873882	4.41515961877378	4.10713264106424	4.10802758471699	4.6800514157982	3.93765047145674	4.18117676458411	3.57604331530708	3.11672924444215	3.6056905538734	4.30266894637817	4.63765386332537	3.59855813744754	3.94899538983429	-5.86648966944779	-4.35808033068047	-6.93418283354088	-7.32809809901035	-7.07326046228418	-6.91883227661808	-7.23596171228522	-3.60707608836101	-4.06090152263485	-3.63840235537692	-3.30250112963595	-2.88339650453799	-4.07581905917872	-3.35036760467163	0.133689110145027	0.475662570059367	0.000118510382347773	0.00580968717037916
ENSG00000018699	4.46943977081424	4.55211166427886	4.58851320871569	4.69984609888062	4.80185536960814	4.6223231754343	4.71888907587761	4.18390759934327	3.87977170869575	3.93774296676959	4.33747565332569	4.3020301473047	4.65154674753769	4.71836925486396	3.75336370533184	3.53522188927883	2.85456833997762	3.91721353587504	3.81442585024796	3.84627484824535	3.60706695136944	3.41121617432647	3.16261598360341	3.49676227593188	3.81704938331085	3.70526312449651	4.49708496357921	4.33432624356829	0.175984372846885	0.478361001500389	0.686692917041656	0.840858487724199
ENSG00000018869	1.17296949061615	1.66675368080691	1.57744426826816	0.749705949629111	1.22410158203007	1.22340099709191	1.31318409254076	0.52263855539219	0.523652136881327	0.722934538355642	0.259978141513761	0.55056691862397	1.28127840060669	0.621829984840202	0.871888575296661	1.33928762672418	1.84569723982208	-0.183167453475763	-1.05692618059436	0.814942054808265	1.32459380385295	0.270946774332983	0.0197248489720594	-3.30683980738491	0.500747447690858	0.284645582808416	0.636096665052467	0.666048572714724	0.240675008941303	0.428763124560976	0.234885946632823	0.825563623372552
ENSG00000019144	3.53210293487256	3.75096486158636	3.71038596271156	3.72844724155392	3.85532509879878	3.97914495679842	3.80187831937226	3.23774863339271	3.55339605766486	3.45154856385125	3.40718143818597	3.1580595274976	3.26762269756898	3.08088683945364	4.34559239009918	4.3550492913341	4.9082672930254	4.82838697298106	4.98788740096962	4.71563030357776	4.32411151328068	-5.31885774032102	-5.30508182496869	-7.37358705788436	3.84334572184527	3.93497336750876	-5.8843866985118	-5.66996539957644	0.00330975316034559	0.0487091043660668	7.88008402811842e-15	0.0021848265472813
ENSG00000019485	0.410765455656669	0.255106538160736	-0.0463214373669152	0.205853604639351	-0.17114016248188	0.015652976769827	0.601119312594105	-0.424951143571324	-0.730860475921526	-0.481754039950488	0.156369243734013	0.057285261108273	0.576461045149768	-0.0616538298592655	0.309148811928395	0.890783280624454	1.55626046045226	-0.455441240899831	2.15478784675699	0.359125934670507	0.894504619274691	-1.97584821249683	-2.84133111550978	-0.126599698687535	0.778647068784504	0.218841992289844	0.760864044047628	0.0764924084446386	0.743726103013307	0.958594211990549	0.0661711308515837	0.852598022729815
ENSG00000019505	3.07475129656259	2.9109583954118	2.80773853804028	2.75934223372322	2.72977583423949	2.05334733563996	2.04986383028183	1.68131872404453	1.65552197213675	1.35130767494502	2.37842858034108	2.15710994509587	1.14375317945038	2.23861247610186	-3.92515425889622	-3.86459792684066	-2.88566107883718	-3.76521496755219	-3.48392707387967	-4.88219856617673	-3.75281014813127	-4.80513383640605	-4.90706639185051	-3.71132076413082	-4.21907856692971	-4.12501514037708	-2.81650402697996	-3.70796347520678	0.00870164152722742	0.428371565264474	0.670414083194214	0.795246309396909
ENSG00000019549	-1.55763018365735	-2.09687380035061	-2.39843924280618	-2.23257111550752	-3.48553966554723	-2.93240160499825	-2.10987311322224	-1.75896696813798	-1.3286102650423	-2.55187222013643	-2.68984751527221	-1.06476424258529	-0.710085708945046	-2.92626299734232	7.28175164575229	8.28283536595217	8.2976934000691	7.22383902715016	7.54202761406934	7.82813859607585	6.88644395290795	-4.68473048289204	-3.22883707692316	-3.78434830193456	7.64245441835595	7.80730253959866	-1.40530223503841	-3.46700801534509	0.705705329143825	0.848645684239478	2.27355978891213e-11	0.840858487724199
ENSG00000019582	3.63799425747533	4.16006636092118	4.40306284974972	4.567845711614	3.87886005553751	4.63516552889204	4.84209973791712	5.10798137714874	4.96236026098904	5.35619822756029	4.89600155748584	4.77920786213012	4.21197432533773	4.02183731276266	1.37962995411398	2.6888977703544	3.02448831852649	1.03834497287879	3.24831500721669	0.626316835902522	2.06083997325889	11.1989876513616	11.4136514726947	12.2913550242284	1.55346327181062	1.7085332522579	11.1826850583959	10.5258169424919	0.268768206014121	0.471637534866796	4.93106516833723e-07	0.916161443299257
ENSG00000019991	-6.32527796059809	-6.66620389484274	-6.58086412528536	-6.3998840572746	-6.48426094500335	-7.28307836742273	-8.32175682224123	-5.35836710801761	-5.49622972992238	-5.81985086539247	-5.53647644230785	-5.06912067189516	-8.65960466202415	-5.96671006832313	4.37015435061874	1.98324980211179	6.11412103987096	2.71801798939473	0.83980737309097	3.21238409128618	2.62780645722047	-2.21685082461345	-4.10768298918248	-4.5380618522914	0.587149426262104	0.603549424761236	-3.58247454006495	0.551152405027649	0.766410973137002	0.812426083688588	0.000172711242592461	0.117315840031296
ENSG00000019995	3.62732161483897	3.40981476891321	3.6321928706675	3.4585469056082	3.40277980394036	3.52357456844404	3.71507150343662	3.75984179604479	3.78842359004695	3.59276320435255	3.8037840022078	3.78164135730938	3.67132448758366	3.67192367006911	4.43670186706924	4.38948206897955	4.1815042931573	3.79160898857164	4.28388668676669	4.13618159308383	4.32714133473643	3.35691476425681	3.29445637460004	3.77865584865963	4.2124476992662	4.28303725601892	3.10705325988436	2.79486036533515	0.193730708118854	0.33693344482292	0.00184137107281983	0.92915585569005
ENSG00000020129	4.77870460168278	4.33370549288349	4.38310053269038	4.22696986571717	4.43645076463559	4.14957690904709	4.38289199763121	3.56850735131935	3.38446631686197	3.06948311899312	4.11843299664111	3.65550650693838	4.77421640650379	4.31960170559176	4.04512902707945	4.08382248974824	4.03825120813939	4.25619815525388	3.81368779253077	4.16773423288769	4.22250799740656	3.61385138564313	3.56121626834002	3.59936837796841	3.97878792584793	4.09194119917252	3.80543770260232	3.82580266410607	0.0284296704066442	0.208082769870034	0.290780328133601	0.913399905151862
ENSG00000020181	2.59515035575948	1.86767108760605	2.64937249264507	1.71380992916023	2.24723803732148	2.59118487354274	2.22717865002738	-2.05958550728829	-0.629307320677817	-0.682171073119523	-1.41669149339511	-1.0493263097893	-1.55822001415013	-0.780194815824001	5.99466810299469	6.59313774748674	5.62355623444283	5.74770813550818	5.43525341804	6.37306538695951	5.77977375943005	-5.12994564310677	-4.4693666714914	-4.99650129433678	6.62595553840286	6.73300234192438	-3.86865898902039	-4.17700194429139	4.47865045655071e-07	0.000739824806398094	1.42700039264466e-11	0.0154489236798335
ENSG00000020256	3.19518728076362	3.28002929900986	3.0863429480234	3.43586559888245	3.52357137692269	3.28360534165515	3.12816342861763	2.93081075075286	2.75136002186365	2.78146031142511	3.36204339224193	3.18921738741456	2.66651205980113	2.83496910890219	2.66279497870706	2.74041395054007	2.7355447355351	2.31746412110014	1.80494722265523	2.66934773589948	2.61994485014248	2.87732487002699	2.99769531754823	3.23717711626182	2.41003027967078	2.59683647087073	2.72755592606809	2.65815757729393	0.122455670643628	0.99492214462868	0.266061736236209	0.956133813456193
ENSG00000020426	3.91064238087769	3.57395567684935	4.00817392130751	3.9743296169055	3.69605828478564	3.83075284351439	3.8136142691678	3.95626530617015	3.8592131836043	3.79108794141807	3.59589581229678	3.52874813563644	3.5245818968109	3.74870358974847	3.9523518834578	3.30303085265584	4.06483249262424	3.64877583611007	3.84037383103821	3.42630786664872	3.93344471849448	2.97358411999089	3.07713631498719	2.83579265975771	2.95018357737266	2.94444943556955	3.04692788364209	3.06874348465602	0.293817546396582	0.288694748425564	2.27078037290899e-05	0.00679920572900082
ENSG00000020577	0.273483318705705	-0.271714600419112	0.263499862070735	0.187979418985926	0.313239926367562	0.337904563859621	0.685954612820664	0.51546170129723	0.479948580444469	1.29043154497863	0.649156092145245	1.06770898183349	2.30409150118501	0.352636895325691	3.460464275646	3.27430371531397	3.4351966036797	3.33469506806877	3.33957552405178	3.39544469113772	3.22158854947586	0.43313449526722	-0.703145406093291	-1.02329301650551	2.85838046133028	2.98117633424542	-0.655626519098085	-0.703313666840514	0.0551841321242524	0.287230504895798	1.71746235894655e-09	0.255724474835561
ENSG00000020633	-2.97877515580083	-2.77450141960971	-5.51240849313104	-3.75603973611784	-3.06830329082335	-6.10408326214089	-4.02972230308991	-3.6097037272488	-1.47945519743768	-2.43471137673946	-3.56910667013682	-4.74005004149267	-3.60042033986817	-5.58514074228153	1.4452525754422	1.40000446691522	1.86682882139686	-0.140641877540241	3.89236152496296	3.82008192437519	1.29012456583339	8.10337580724775	7.61750616190685	8.53231404035849	3.41534188775488	4.00094003780131	7.2910239873718	7.53073394352006	0.886591239020288	0.973859574869233	7.43740981095839e-07	0.0945762080946923
ENSG00000020922	3.4721208721471	3.42648614225265	3.67492538222973	3.87364931767595	3.6032359990154	3.7598252845889	3.77731489168452	3.89153830157043	4.16766657740841	3.88364247181573	3.51010434448953	3.56606144866612	3.71686868308013	3.75372414457143	2.28111886367446	2.14830696550243	2.20630954549885	2.70436134198928	1.68886696422856	2.63399941324434	2.29825768447675	3.98782185289554	4.00183663498232	4.14677832795249	2.28953937757037	2.41976011388819	4.03884924550793	3.99200904448861	0.745600390695353	0.695289591743409	5.12190695426644e-05	0.956506187705639
ENSG00000021300	-0.224325078047137	0.165776312409273	-0.323276594671874	-0.914327316510523	-0.526065153080982	-0.0132686707881469	-0.863969956286601	0.0275117130563596	-0.475404932716284	0.852760820636458	0.456532016395698	-0.194703784247574	-0.227381027901635	-0.0130012711310847	-3.21507561928266	-0.991360698489939	-4.56050766556845	-2.20067774752543	-5.06678261277571	-2.06886250104777	-0.468239463394883	-0.0727453798043458	-1.22101430277969	0.514808297042452	-1.45165929979071	-2.24810554578321	-1.69712243628503	-1.56092959814598	0.471272695194084	0.653547531802183	0.0739591446882963	0.627065050350821
ENSG00000021355	0.72060577659959	1.97005285192291	1.80719312408807	1.90238339583115	1.71821044155973	1.98632208249713	1.51707043492424	3.90423998674276	3.75856172807579	3.22208553293947	3.44218311581323	3.93991340959658	2.10518147982176	2.87990682605784	3.97195553074278	4.07357912233822	4.06867971890074	3.99463557527853	3.49597388098456	3.88098559751411	4.6987623187606	4.88804288187814	4.67840897158998	4.63266328566105	5.47928926894218	5.47582509979238	4.43503347636381	4.99645628391836	8.81917229038095e-05	0.000455244354616572	2.67974257686782e-05	0.000145674387409585
ENSG00000021574	3.68647081632206	3.22022748647003	3.41337331755164	3.0114226977998	3.23828996113478	3.17863184096756	3.37000514816242	3.67713809490564	3.21499943206874	3.44463018436289	3.52349368540193	3.51398076388943	3.71373440639462	3.92127535385394	3.2469335302848	2.91656125032995	3.38952019794754	2.80767523087905	3.07931463219441	3.1562821713238	3.42843323269208	3.00661357841015	2.68441492633934	2.91305832785985	3.19820527401375	2.6249868939343	3.29231411818905	3.23537165057317	0.151403288636563	0.494679039738552	0.321369801532936	0.55146941277791
ENSG00000021645	-1.13203525925364	-2.19225389877624	-1.61102217345753	-1.61557025269409	-0.703919299828092	-1.86115883591442	-1.29109442378169	-1.73719513376268	-1.96270820995444	-1.84636417141948	-1.98522232704328	-2.03310401295737	-1.78829452093932	-2.45642472355252	-6.75630831079396	-6.7189663098497	-5.76588541676031	-6.5925912528062	-4.71656068685783	0.0575402257882391	-6.56249666908116	-1.87185859756128	-3.83326187027242	-1.11291719491657	-3.596360557301	-4.6155752090944	-0.277203684048396	-2.92697403438124	0.594766988927654	0.766544011487377	0.0458259805706882	0.634246125781054
ENSG00000021762	-1.43709471235758	0.0116222439650016	-0.211650750453178	-0.896779228928821	-0.0317549272194408	-0.183096781941233	-0.304971423864708	1.3985399169125	1.83466105059802	2.33788925188868	1.30923624749736	1.4517183760357	1.07406808105505	1.52200279071643	3.07481463879678	3.3674416357017	3.73202922164582	3.38379850129084	3.70977728300504	3.16719157440695	2.88222779889917	-6.777870458367	-5.66569592283937	-5.40349390534853	4.03419262628236	4.16991798499009	-6.22655428903315	-7.09843483087684	1.7030992882082e-05	0.00123921447265966	1.12808514083137e-12	0.00563252362319268
ENSG00000021776	4.96818259094427	5.02009573428335	4.91355231030815	4.93756592281605	5.11813052466614	4.96051146017699	4.97737384039304	4.85680097831992	4.83377142437135	4.56142623796004	4.90636529325485	5.05265910043	4.78302770473114	5.09241279283473	4.40370656477239	4.24190402511007	4.25390084546125	4.30288313156174	4.36532698871051	4.51917417379291	3.97804336014744	4.19026449473865	4.03936024167009	4.1009279094984	4.09850156294034	4.02272009670119	4.8402764745121	4.6573229935405	0.628880438123406	0.991560679998148	0.529151126864382	0.395988378715082
ENSG00000021826	2.0269398078965	1.97695660622957	1.76983548665641	1.71860004417993	1.59109839443105	1.5554634472041	2.09749765166051	2.00016620592757	1.80201535957957	1.98199841818615	1.29561992277927	2.35518626153338	2.29243418534043	1.65509190734114	0.663704015372007	-0.989338410751685	0.349210230575245	0.180430060907343	0.259530801913122	-1.07442679705083	0.985514483295448	-1.73375399893514	-1.39202307369777	-3.38337657465403	0.586062551227379	0.467970541327601	-1.55074936780263	-3.42933246785988	0.797750637535508	0.956997133252551	0.0900935377766245	0.394052218005208
ENSG00000022267	2.93732914457907	2.59040367801833	3.08297849168252	2.82007512826947	3.11428377226468	3.29895671835913	2.90767885059118	2.63892929531015	2.27364244351044	3.15268043687243	2.60982173133884	2.72156138589497	1.76270513365961	1.35069245056745	6.50330571951415	6.00428441477469	7.11544764101733	7.03978743886924	7.20588202888932	6.4718390977063	8.0979147848156	-2.0325331946185	-3.5094256983944	-5.01093544315728	5.66626750311193	5.77434404915269	-1.27535867734511	-2.26600148997332	0.329902244393054	0.779517363905577	8.2062134205446e-10	0.0142234331580528
ENSG00000022277	4.00137289074314	4.18344521155643	4.19839420903908	4.03892558018238	4.1509472315662	4.03639239175111	4.16069711955363	4.37024661006	4.41728668482245	4.47822901470792	4.26421311482283	4.44590787381927	4.31401180142946	4.52840173668592	5.5749474210519	5.55841562908227	5.32001519787339	6.05141518729403	5.64034186104405	5.82652103140555	5.90752658722768	5.13551593202718	5.26373687665449	5.11288647538036	5.7277925892255	5.76687289102952	5.37580678481585	5.35262927351871	0.0428871049542717	0.278713412537197	0.0585146211272577	0.859936019946677
ENSG00000022556	-1.35371574780531	-1.62476471288712	-0.90597069864235	-0.108256967358115	-0.779577483777434	0.553357036680245	-0.75817466380233	6.17124474284035	7.21589839465254	6.94871075104831	5.95142681280162	5.7555670760388	6.1381530290454	-1.62001374187759	-2.64723064378802	-2.61515277017357	-0.0786733238438032	-2.48261573804962	-2.18778127019743	-3.67443853724908	-2.44786934802591	6.52784242287657	7.31460257564249	5.83770274914251	-2.95063162386355	-2.82631310886077	5.69262732583946	6.15634867031086	0.020143236078417	0.0350797239716211	0.20929178343852	0.944187187504436
ENSG00000022567	3.51609223551873	3.18448645805024	3.05518454749425	2.47403704782866	2.72488478063587	2.70072491514332	2.8159236171042	2.31903837485508	2.21260162070946	2.04927556191223	2.42117278965072	2.50052227109832	2.75699384975703	3.21857848581616	0.765756390737124	1.35212983905418	1.20855717666563	0.676301892748526	1.41165969666014	1.09680488987661	0.637473475862008	1.05115557526395	1.05874639230089	-0.184864592787028	1.01463669866952	0.671349376008501	1.38304099757248	1.04469812314532	0.0962340031420222	0.31985268869305	0.68728563839556	0.861313758490436
ENSG00000022840	6.03724194525625	6.14576513618577	6.06307289367439	6.21865095388525	6.10864796814355	6.21049266512012	6.06338306760563	5.94123208515918	5.94515299082008	6.05627197168789	5.94611915107031	5.8647265320446	5.72895818123841	5.87343526943816	6.209319743031	6.28072937493151	6.08413945459217	5.96995313641012	6.14192069133436	6.18360296314449	6.40677246356299	5.73194741184836	5.86279294961524	5.93314992877711	5.96901596618231	6.07117377971918	5.68920382178692	5.70111078675979	0.0226077772128543	0.156322684243682	0.00190976710598755	0.313285869029013
ENSG00000022976	3.51460846978381	3.40563105114212	3.37908823293459	3.5285078121587	3.27539807712602	3.46645743194771	3.32611412799077	2.90167962968492	3.16327903683856	3.36961539149968	3.16036631045469	3.01707775963704	2.38251377946299	3.03007618663863	2.43336419582001	2.48840185552507	2.78199956427589	2.47314083909871	1.94976679139616	2.24764553555531	2.16468601269874	2.90301750875936	2.89831960805004	3.17951430272301	2.02933573115139	2.22584470103616	3.01251895659847	3.11960347606192	0.0159644534414809	0.229933735740835	0.298452081483798	0.609419719260481
ENSG00000023041	5.10145420356206	4.82750439372726	4.76797427706834	4.67920786476001	4.80013587405601	4.96437351645342	4.75898085135995	4.34692350379939	4.40451313929947	4.514137283568	4.30204510639156	3.90050276601968	4.36664799492826	4.08001188209657	5.17672856255358	5.03892335709481	4.93915340286974	5.19507817516491	5.1466838310641	5.10303513763444	5.40428920422046	5.01886587493122	4.997358723945	4.78139239097716	5.08396895302309	5.06048940927083	5.18611754755061	5.24958323354811	3.93206148830664e-05	0.00102740634650901	0.470698950181391	0.800581347945214
ENSG00000023171	1.79021768482506	1.23555136629096	1.26828617002257	1.24023921479951	1.48730714350495	1.34032890365764	1.28833502673071	1.10916170695765	0.92896663647263	1.01391879150975	1.38093975939574	1.06896872312221	1.08966726542259	0.908239563169959	1.66135341732428	1.99372924284822	1.25837148023537	2.45260131018562	3.47720223647285	2.44739081059093	1.81300967819911	-3.07646784525809	-2.07006695993241	1.01406937017486	0.862123577250273	0.322833142191621	0.130309195330458	-1.12449745606153	0.604357481966212	0.873285195625577	1.50332280003336e-05	0.0703795290257193
ENSG00000023191	4.44302597019399	4.64604796539307	4.51954589364162	4.86296063216132	4.76470422078528	4.65538637611623	4.45667934074835	4.46943218624525	4.48800385499232	5.08181918847666	4.30898278849896	4.35298831313179	4.28508480424087	4.49577619061119	7.62300848667811	7.7391742399173	7.35075750205807	7.74923738805436	7.18619042789006	7.75637844011057	8.12288282567773	5.84108655617297	6.02358000915834	6.58296366695841	7.95135496209379	8.13023574323218	6.06983549975119	5.89003562982029	0.477077831775524	0.497558340714616	0.000429861719911556	0.147093930650026
ENSG00000023228	5.82692285634936	6.24539975377045	6.26344001711756	6.08849437140091	6.06726822711993	5.88840577754699	6.07644580875242	5.56833712985406	5.32769851228741	4.99728209444956	5.64615826919326	5.62260757635162	5.59131057938694	5.60471535301079	5.94177317930514	5.8228568971822	5.88577224492661	6.14953926372289	6.1243485842693	5.96100754163242	5.53177191369452	5.28957835149106	5.22633168405872	5.65807008986407	5.38845857321864	5.38077382035528	6.0710923794674	5.76537321137149	0.00240896528151696	0.118830445907166	0.00843806247382698	0.0589780928188099
ENSG00000023287	4.53026950320791	4.13993927203275	4.15015107371605	4.05704151749728	4.13773010120622	3.96937465422523	4.16673219650638	4.52373922307714	4.6329290068113	4.64586026038533	4.35210298984981	4.46474770570079	4.42799924612666	4.53050818038648	4.61538356486825	4.75496174516724	4.11254915694487	4.09732352802203	4.76325735579817	4.45217037990193	4.75201954824586	3.56399764923061	3.42018033810108	3.47267007281551	4.99035282037903	4.80195144762136	3.13403112698354	3.09406942962077	0.0378536845867985	0.348459345445901	0.00730813408174297	0.103037661601787
ENSG00000023318	3.45645021441245	3.23069514292971	3.55461843687512	3.72226484487483	3.45274388409911	3.80104639527854	3.62065120418172	4.11632430522307	4.31827249368464	4.43580462273753	3.63447120909077	3.74715086774768	4.05965574148286	3.91944538126461	5.47807307828242	5.64298171077025	5.3340072219159	5.137207773854	5.13513933786215	5.42642427373156	5.72159003670716	5.33908393041973	5.51939824524762	4.83276397186899	5.2201869987567	5.13525981161375	5.35752659677471	5.39455380376757	0.0303206248050185	0.68870650944029	0.203467996180026	0.391094368113144
ENSG00000023330	4.98644167022728	4.91933750755982	5.26194045559037	5.39621121855631	5.14790662664748	5.19773776297917	5.37485056866039	4.7324791362892	4.81230952856573	4.73307303765522	4.98017066963413	4.79913425597308	5.41480624194628	5.16935583797471	5.02810771786579	5.07127801541073	5.0340010888834	4.78930756600033	5.0065480506281	4.89137469711249	4.34934041801714	5.69118466720239	5.83760624435752	5.7023044595664	4.66388067621356	4.74039987445551	6.46018441035329	5.84886702334749	0.188339498853277	0.366535291940845	0.0200735570135115	0.642831983624941
ENSG00000023445	-4.37499856102949	-3.82627351608374	-5.35740614219932	-5.70454101342325	-3.4375669643995	-4.22796505580708	-3.59996460587779	-4.0553820646588	-3.28303736236466	-3.75631923490568	-4.67816129681971	-3.77636759721027	-4.00042949987729	-4.41176641962662	0.416808600678939	-0.150373131906717	-4.1136693183692	-1.50860159437263	2.14844475816232	-0.642970388564111	1.24361926140276	6.78960426362656	6.4846737011571	7.00674876337545	0.384640994354066	-1.05067679114952	5.71425969037397	5.59605789985897	0.89556949321429	0.972575328473332	0.000118344015321685	0.954612052214887
ENSG00000023572	3.61535359251389	3.65637883960958	3.50513425157857	3.69613503303752	3.63995572254853	3.23829327459379	3.52684188671087	3.63025653798606	3.68824592170843	3.71718846288705	3.20312244695453	3.24259793015178	3.73539564565595	3.93817498301502	4.72483417929954	4.38515521554694	4.54604243827432	4.89224947098571	4.68374016076842	4.52950363000139	5.001371761858	4.31703239055327	4.21737080224388	3.81611645155565	4.20318570496163	4.36287491613386	5.15017643754114	5.09287079691872	0.877004441225668	0.630286698405066	0.202907974970257	0.433851536180987
ENSG00000023608	3.58124430300385	2.87891304777546	3.17925817560119	3.28350355345649	3.66670624485009	3.19346996619647	3.62911667340744	3.58312165702662	3.76087290033877	3.59837846770034	3.54083177575007	3.7570982072379	2.9293132965928	3.07272862510353	2.97715518924817	2.96099902708801	2.3222136547966	3.46118624118636	3.23980594283886	3.00999682869213	3.65692452444709	2.5759498660595	2.89377544786544	2.63124200885532	3.92267265103008	4.61587373100461	2.48778619872789	2.60696484378652	0.470877561397718	0.43243454838198	0.11360097698866	0.00190637471099258
ENSG00000023697	5.1000492938033	4.95775953487565	5.20556687172605	5.22050779150386	5.14095877618401	5.10453797282434	5.2565708047595	3.52397431593135	3.338855004406	3.30993053129055	3.17341357451293	3.98213001136907	2.51775405750232	2.85042878866707	3.91648032745176	3.69591090756842	4.33893159669267	4.04561153950977	4.17884367017988	4.06429904444825	4.22201397198174	3.98333991921349	3.68821157818392	3.77882458436502	4.06731267422647	4.13669366796428	4.39565657173063	4.25922062388587	2.04125620812752e-09	2.92905781764282e-05	0.961223445326342	0.929433589078556
ENSG00000023734	7.8860978927601	7.76301582763002	7.74495467882693	7.63680971816585	7.67726859508953	7.39133163799536	7.62503461711992	7.70332164368487	7.70758526409243	7.42629055907589	7.91784006383563	7.67912023722122	7.79400728701827	7.81291204728945	7.37656792363176	7.54283277129129	7.01496286463779	7.57227443392703	7.13289618024949	7.55277722093514	7.08494856171963	6.41747063970845	6.43567240996692	6.37157721453157	7.05675143296136	7.11213442809431	7.14305757000426	7.15336840874931	0.730128974875889	0.726011677542115	0.00775878372555583	0.446020094536382
ENSG00000023892	1.59435153898429	2.04423214879625	1.63027875905791	2.11339611003667	1.62194460458058	2.24323148728218	2.09070402043367	2.53183450548822	2.7340593587326	2.95022526094835	2.52393135775194	2.44858818776136	1.29641549158293	2.04087720064441	-2.72407736230669	-2.45871195559093	-3.94585939946098	-1.8329613209362	-3.34752745219251	-2.84148494636967	-0.759624156885519	5.24705446521239	5.37871048522282	4.66562574379437	-2.2465619480367	-1.53454639189444	5.53722431547171	5.60368837406663	0.191939734101026	0.32310942042494	8.08667472604896e-06	0.724660200072796
ENSG00000023902	3.11350510621887	3.52533824676518	3.4864312844315	3.38182688925704	3.67214991888803	3.48623791700317	3.47226146416571	2.94374360265644	3.100360620699	3.00583021583151	3.12987004239721	3.06403586973951	3.23263782738928	2.50319346769428	3.56745147817744	4.36118233141991	3.92314799705498	3.99509063393074	4.67677024350296	4.23084413444234	3.51089092950281	4.85150196194367	4.94238252864971	4.88352701319705	3.92150249246908	4.08814114556006	5.27719349120799	4.87251670106382	0.0483028086706051	0.33500382951355	0.0146786879923067	0.922954415325358
ENSG00000023909	2.36184469043156	1.95445185703266	2.19558109141189	1.89314918920178	2.06300536361136	1.72815528288839	2.01132138063961	2.3875075602398	2.41643766713743	2.52273192762308	2.44747760566996	2.92727673594855	3.68597220415145	2.98916075100594	4.23415423700183	4.01909253391594	4.46787537320113	3.9179751646335	4.21811838386193	4.1962341786963	5.06305729516243	2.16875256728413	2.09240134691877	1.99152890222813	4.10175275846653	3.99455174071054	2.49728799729188	2.78472258064568	0.014018871365022	0.144062991366291	9.93002654301408e-06	0.578944457234867
ENSG00000024048	3.26819144390094	2.805366267291	2.60360232223792	2.48017969659175	2.64115360102392	2.65656618176396	2.61818290571331	3.10540049656476	3.03029318803692	3.24404436705254	3.10308718099532	3.19188022661546	3.19980693307761	3.18444429910058	3.43468906665986	3.34063583574504	2.97729301544709	3.21536187405228	3.41508309896637	3.33885752079779	3.32826337295375	4.13719828477765	3.87017995577253	3.79889468760758	3.80715214660043	3.78366374745487	3.38199505328269	3.60416048185823	0.0087538352434431	0.0928403506341703	0.00101030445037002	0.0367700744993178
ENSG00000024422	3.11842438943669	2.82296987140464	2.73950637941895	3.29527405915516	2.62841432857835	3.30752101807172	3.20318336105294	2.53562235035201	2.72543523864224	3.56667848661406	2.39507699375185	2.76778256785302	2.80968383546927	2.15683255356009	8.40092658855266	8.46262153618807	8.27779046135204	8.43569217155916	8.26438949679171	8.35290655927284	8.37954635121376	-3.84336903944437	-4.60372979931946	-1.16010100238731	7.88423790601116	8.0608537073329	-2.38482911659036	-2.99820602094497	0.195545541775576	0.366177005698305	9.20425718536369e-16	0.0635037115738713
ENSG00000024526	3.88742169039276	4.20775734602695	3.95740306587879	3.82782570934414	3.53838458729896	3.38987196113459	3.95151128149151	3.04724781267234	3.2888605157803	2.8463877612182	3.35300343568641	3.77305650472604	3.68679423627344	3.67078661577581	1.69378504105988	-0.288779575855876	1.4078591597436	2.28243137170346	2.68874473401951	2.38122715086077	0.526366510104857	1.66952237886785	1.57402226686449	2.4914274740186	0.105303185101229	-0.690750517542368	2.73459931493566	2.3777742724008	0.240442425190457	0.708938345860013	0.25397724178745	0.115820851020665
ENSG00000024862	3.60994843695326	4.05397771246188	4.15036996062081	4.16663627630903	3.94505008277077	3.84965535690058	3.87226954172363	3.89970177655884	3.78835736695424	3.87938572689995	3.67102163726376	3.59888837460722	3.58424053821979	3.18149367378201	3.16440462101093	3.60688941128298	4.38307703432035	2.64275698178706	3.42734067559472	3.29346002594003	3.74506902109856	5.20309948794137	5.16025576964927	4.64191960498168	3.98112559707031	3.88066131394699	4.27553476019598	4.28178675632421	0.316083675807336	0.553568948991999	0.00167510484661704	0.34321164672403
ENSG00000025039	2.02003964182493	0.719269695842243	1.8143928251132	1.75595421821402	2.23383805242469	2.07273097256519	1.79234166375228	2.83559673796634	2.86098927839644	2.94399517173444	2.53277709554393	2.98032158620035	1.76573146664817	1.86663713245133	-3.42734644700967	-4.46711094658722	-2.94977260650241	-1.90645251237675	-6.90235815906951	-2.03305665187071	-4.17345520171955	4.68275424527512	4.90540741815805	5.16723652759356	0.788858757038475	0.079754326793255	4.61256364599539	4.02861549099467	0.0250359497071666	0.0731934436282012	1.03026954947373e-07	0.0028740879355924
ENSG00000025156	2.8695557142966	3.14680958547268	3.30320353391847	3.18145180680889	3.35457536453531	3.32483245465523	3.06164681296604	3.69613187363346	3.69777915554804	3.40059552443188	3.43666210949037	3.36769642488031	2.904932811189	3.19454502901234	3.08791849424586	3.14043355437557	3.57411970701691	3.15017615896115	3.65032667693568	3.09541529199074	3.10739593206094	3.56482771487546	3.58141622227464	3.1845061519152	3.08606586726231	3.08015367509088	3.22997557138334	3.0147430923275	0.295965005758308	0.530647906350431	0.922240424471325	0.734554542476676
ENSG00000025293	4.24684250615241	3.86116137648682	3.97193095054258	3.96332714223067	3.91578335856048	3.85281257206079	4.08100359131112	4.01091516465264	4.13331668864559	4.11780908218573	4.17752712399094	4.38222434742875	3.90189555306524	4.31799885197383	3.24241622865292	3.39255908504339	3.06802827171539	3.46441478487539	3.78186220036456	3.348297888688	3.48272751259535	4.18779191455464	3.81380946462761	4.3061848996713	3.88646018651667	3.6064993487423	3.7837849849557	3.60158513923553	0.180150794015574	0.223786866441821	0.00282981458990682	0.176668990379919
ENSG00000025434	2.16779459433331	1.98687341725251	1.66535840081793	1.8007833300664	1.8922872087132	2.09594440681846	1.85701546588136	2.55848857063609	2.51966091047966	2.66089431543638	2.42224714313718	2.56952980422679	2.53655583954494	2.75088794376263	1.35722043582487	1.49108666880644	0.349096067893691	0.307169908424687	-0.307982168082639	-0.465921793529311	-0.0287351670006124	0.735879297493529	0.581405276110631	0.925943931747108	1.21745954379414	1.51420885321921	0.700440159000965	0.703758625581518	0.00252255373116093	0.0613340051190996	0.0127639067027143	0.0278206068311535
ENSG00000025708	-1.52879498538676	-1.97040176448224	-3.50866728313052	-2.62880864075895	-2.58120976165736	-1.18580147802571	-1.6081037047637	-3.25582443421085	-3.73499442417773	-2.47499229765829	-5.1243724966644	-2.71498428017752	-3.02044946359062	-1.89335756558118	5.57134085524368	5.95099364768202	2.60889307045753	6.62542017480984	6.85491876570393	5.74830538465479	7.2574460880593	7.04800796047973	7.28397214189236	6.76319536419412	5.78189793731129	6.25373710965781	6.82408416318767	6.82923686468244	0.642887766091925	0.712259712971505	0.158147414373008	0.859666678385898
ENSG00000025770	5.46916457440703	5.68969635144478	5.81295023469447	5.77315943697931	5.81572701310885	5.8745773319553	5.69439001299999	5.45969137110019	5.41218201447831	5.48790324677595	5.32828239238703	5.27201325296575	5.51025652835631	5.39079592307845	4.54543829209728	4.5584059498995	4.52186321505224	5.3624760737084	4.72118431685296	5.07703614048929	4.9525657831353	5.10997841910862	5.43280146312354	5.26102355123996	4.1424097683377	4.06996454238488	5.81933381539104	5.9060857113652	0.033658278912835	0.111079213161756	0.860723613976138	0.0311499766586715
ENSG00000025772	5.82247192239649	5.97618862695739	5.82450515813053	6.0543987455929	6.09049194420332	6.01110577023508	5.76698470610986	5.56604556234933	5.79309804100253	5.76782771136233	5.34954249248954	5.42422104124559	5.1955277618207	5.40373543031419	5.05792911052683	5.06122881391054	5.72319230875489	5.77366030718602	5.62286776069878	5.36000690340981	5.66789326527502	4.59550991192033	5.31393936886706	5.75255855734332	4.92633477283427	4.64015502551184	4.93308195078974	5.14430893161335	0.0197245663483043	0.0920768989184853	0.0146832276981072	0.0632471055005274
ENSG00000025796	4.29435285948204	4.32101919687926	4.36127227895315	4.32955855220875	4.48828179479482	4.40891066220958	4.4531461630294	4.81043605585082	4.76034813078253	4.72855469402006	4.85745567412318	4.733707480812	4.72551977321718	4.69751325443025	5.37960033478043	5.47283338992237	5.11929101912983	4.77138817829419	4.95588930641707	5.19298589222423	5.40864256807537	4.58039135070885	4.71915427302123	4.35091823177974	5.61772654248632	5.50444013567912	4.39046303049684	4.48934841589848	0.00246292002087192	0.0341425189341054	0.17015796571548	0.0480952269111037
ENSG00000025800	4.75679956798591	4.12869107601301	3.83703873112956	3.53446859373343	3.74024717612217	3.20437973604503	3.80576363488435	3.26189484798992	3.07750389738592	2.70558198610005	3.96989890465375	4.04161960953484	4.35465591452946	4.41194063592756	4.18493622115882	3.87685597617782	4.69826441946482	3.98856502593867	3.93165218244993	4.23398654972442	3.63666495657441	3.52952826607255	3.09983887956137	4.01331271508818	3.94591748452281	3.45482601395009	3.92055822233352	3.82878593909508	0.885129742648719	0.832603324495359	0.207584205368483	0.584429672089325
ENSG00000026025	4.42362931487965	3.7170574989425	4.43730120058518	4.4752498120245	5.58147880513153	4.02046181968293	4.81751393832573	3.96843386630098	5.10614442031688	5.66058652420991	5.29249220662729	4.82698230936535	7.36687136051481	3.3053927428693	11.5044852311342	11.6675920936327	11.6841200853108	12.0415687477693	11.7179633363755	11.3271375384845	11.4062282061637	7.70075683456893	8.09524303368674	7.21718559446714	12.0524030869844	11.6973367221709	6.80410392762333	6.81265151725699	0.332960764129841	0.603909636472103	2.6231918487003e-05	0.788941656476315
ENSG00000026036	0.50029230059209	0.474209865154552	0.229740060689486	0.0130574950267126	0.106272874849815	-0.22142170373329	-0.212282029681968	-0.0756623330417479	-0.929908107202732	-0.562366058423437	0.248887647263462	0.268342921594983	1.08748336010217	0.927201411296491	0.0639013962857167	0.0653014865212553	0.621017070608024	0.328962467089751	1.34679397913695	0.654778445234896	-0.602169003566958	-0.638677585317192	-0.409262837575721	-1.29942241919928	0.0720693851170247	-0.164267197023052	1.21739220705549	1.27583349401252	0.935693439159382	0.911637441262665	0.373030495966995	0.727367577198251
ENSG00000026103	-0.679297520274958	-1.13702458874245	-0.520217012984696	-0.0771712299304608	0.101572568493002	-0.0217755516510834	-0.463355566305031	1.54039069290035	1.12806460040228	1.94779741028629	-0.372463022159824	-0.16364667687957	0.691656504720523	-0.0101014839037972	5.27309944069417	4.90752075383653	5.27429747900355	4.50722235579176	6.51355104612004	4.91479245856748	4.51734281583344	6.22134241516602	5.52878750563824	5.7573545453458	4.69015587251463	4.5166467439414	4.83339420586513	5.34387702909229	0.471817698488742	0.9574454565219	0.912083803268998	0.393527885317153
ENSG00000026297	-0.339744603796021	0.898885052250507	1.47368372862255	1.46404398122707	0.292076278279966	1.17164204954105	0.903135557467978	1.88694370429902	2.43867424712035	2.63534768070339	1.18723303972263	2.16061841855902	0.3486344664325	0.861031399064263	1.22621370450143	2.0514043474339	2.07544965513549	1.88558149238139	1.81207381368515	0.705747086530669	2.8748019969934	5.71119187343796	6.33566935030122	5.60463523433828	0.833093395414747	1.14457220406946	4.08219683673141	3.74222170646624	0.419256122456907	0.607770106443914	0.097752972478188	0.754431572335506
ENSG00000026508	0.783189955861979	-0.178274268573817	0.642488398989424	1.241122788755	0.946704948067989	-0.108108968109989	0.704437318735683	0.749849906592467	1.26423250080567	1.92044075645601	1.0245715458688	1.00500073818238	1.71895524369883	-0.346137172866605	7.44562649106541	6.84485846677448	7.24351961160421	7.09515420988338	6.89221990516075	7.10331520824998	7.45150836800862	5.75436205071253	5.55340900257603	7.02436280946323	7.64387853578476	7.56210179795717	5.67114911498647	5.18651776710187	0.436312315079816	0.690619756392373	0.0831125320706374	0.324212715218464
ENSG00000026652	3.5891976747385	4.11432156953535	3.6686011828566	3.9564949103933	4.42339772867105	3.68602071651138	3.77178648868631	4.01659333688893	4.07565349431268	3.94893988994825	3.74854636940307	3.83788597214604	3.36927221689488	3.20986031868498	2.38713630301317	2.57307907583449	2.97198069957698	1.94628556848584	3.01668872857795	2.4385869342085	2.43917188217412	1.35534470110419	1.61730026304272	0.83695607878719	2.91983586614418	2.94775434894246	-0.239954042379313	0.633160807908768	0.6532082195165	0.873198170196806	0.0625745716820651	0.46968711558732
ENSG00000026751	-4.03099032070787	-2.90055619157014	-4.37286400043531	-4.17499668579561	-4.33035990617799	-5.28945967289165	-4.63300213254144	-5.85974939953834	-5.51491957375695	-5.59472706197811	-5.23210692539547	-5.71381558744568	-5.02666461072527	-4.59100275011226	3.8974987217841	1.75785195828731	-0.913601949134033	3.95228302961498	1.56509179063145	0.23604640431834	-0.303325711498365	11.6542542618386	11.3140064749625	12.5526619855406	-0.00146941468667472	0.0623365356004733	10.749707346597	10.6598597151707	0.57251540774784	0.7456684636017	0.000788260466617581	0.646479536222339
ENSG00000026950	0.223211288843962	1.26545553421925	0.7935339317811	0.609720269920386	1.06133708818498	0.567615577591241	1.02013777686274	2.14593709683966	2.375558761166	2.24049357877463	2.03727200068186	2.23341900519419	0.448198139498316	1.50061406457796	3.33873475458284	3.66946825557464	3.39296399423895	2.52289148828959	3.31714941635438	2.91271698219597	3.19512959218157	5.66901711689049	5.31061403687816	5.3511364777245	3.84436526631009	3.83517786478617	3.80988194691157	4.63779592589342	0.10995081655755	0.197877721606394	0.00141224188850697	0.332488806730127
ENSG00000027001	3.38978685928632	3.57341465801794	3.6798224849632	3.85183561129898	3.58796688068429	3.6845629734691	3.81533379503169	3.36493137967666	3.66420045951053	3.45129115693125	3.68095669873783	3.75238894463168	3.41756419660236	3.64416497878603	3.41042787635037	3.2401962162952	3.88166073882726	3.52677514835017	2.52596463341443	3.44625993215876	3.02847570801886	2.61554165447473	2.8116427163394	3.47217812207807	3.30666930837446	3.39222577632294	3.88993821807696	3.69831656576612	0.886575809963558	0.906624303350564	0.944971457304924	0.954238230769421
ENSG00000027075	-0.364186167446856	-1.33823344139575	-1.25831590020324	-1.78321518329998	-1.47800837480816	-1.25259434551503	0.423998185453572	0.317027216743642	0.386532153438151	0.423786083704629	-0.207199019245213	0.0858792166592743	-0.311344939280405	-1.23182716775243	-4.59474822252483	-3.98228659861915	-0.926070145146156	-5.66717395496161	-5.35896719124106	-5.67625250694	-2.40947230946632	1.9890511706056	1.34034292019771	2.49216707154155	-2.32845774346293	-1.24587451584594	2.92802255042086	0.694865572352722	0.206163863681512	0.428259897397849	0.000296986122228711	0.215582064086298
ENSG00000027697	4.74036139684835	4.9248636793135	5.10451758844947	5.16828905940851	5.0992686422521	4.83400279668371	5.25743925923131	4.4960945371827	4.3752197601567	4.51115246455725	4.38871090335591	4.10722966464429	4.58357992120204	4.13880088893509	6.18530466040973	6.07785902554447	5.27361572787226	5.79611868292755	5.81794643590925	5.62850708134568	5.9564850519235	5.7932573232287	6.10167277537105	7.66620797703896	5.930936088722	5.84589225679685	6.35759205590015	4.90252751558527	0.0852131735831677	0.254286910413328	0.493203398764553	0.924868964856441
ENSG00000027847	4.30118673308435	4.22499639307852	4.42378691078111	4.35574605254163	4.1909434288777	4.48515743322253	4.33294079881544	4.14315282275943	3.87325886193844	4.24927318369217	3.90025797265359	3.58013137076929	3.99768362552	4.15837458174543	4.61206667541773	4.59298052205729	4.76908332863902	4.87151937971033	4.16812185938556	4.74119545954891	5.08015023984306	4.01471971199778	4.15482917400188	3.87983243948924	4.28443122336373	4.25313602739166	4.14889320067031	4.1890285516177	0.00727007416532564	0.0195536619813769	0.000441865967301157	0.0944652301207899
ENSG00000027869	1.19140642875468	1.45879910726978	1.6097820885108	1.79331720955884	1.70787470560337	2.14186399914432	1.75590738862854	1.70109672959001	1.84024485261032	1.70004520646913	1.04231470089557	1.31112195138572	0.734724069017627	0.899350748180268	-5.7656055431815	-2.98410557957381	-3.29861004834967	-3.28624465287771	-1.82801273471425	-2.95237417330729	-3.94000382222228	4.48344592457499	4.5635087192491	4.39753856680688	-4.47540502201095	-3.56624658104694	2.57647895161113	2.63213367650838	0.599046072995739	0.734575737886756	0.0102485001508826	0.859499051767203
ENSG00000028116	3.97880690798923	3.73286714000821	3.83388918444989	3.65996080404518	3.79062156873652	3.69294711934465	3.74111208489875	3.2494648659006	3.29843611950335	3.05408783664074	3.39687974638446	3.41299426086958	3.52830282322267	3.4852429298806	3.83161057088091	3.28753184023153	4.02009044054476	3.66290153103957	4.23144158409646	3.6804139852637	3.81478619293162	4.61445396996933	4.50828952218213	4.18864646093732	3.02223231899331	3.03679777596049	4.73979626550916	4.88535587697537	0.020172268936466	0.208369912419899	0.885347632644416	0.0218326465740198
ENSG00000028137	0.984177784831045	0.773136414998676	0.773275975111379	1.91132180007508	1.38502629348203	1.07382420432608	1.65105379058357	0.520044379024374	0.474434256914672	0.931290839847987	0.49436147816415	-0.724617373662449	-0.0293897006359381	-1.08999772552629	3.33759102685436	3.70919610780988	3.71261908650134	3.96021292237892	3.59765465854064	3.548082813662	2.59401897005989	6.76761676217278	6.44090359556776	6.30224716603864	1.9594253612998	1.88436679682258	5.76534294224268	5.31350376726226	0.133484794167019	0.345845392055091	0.245112675518262	0.0989018296569244
ENSG00000028203	3.40978713012332	3.61995347889401	3.66613134233385	3.56139782678616	3.63008450469401	3.46969385388315	3.73865014288061	3.85509415803536	3.62516084638729	3.6783152926512	3.60209419391822	3.79915669864817	3.86207100244154	3.91698852431335	4.26585882412167	4.15484343497909	4.47943588508918	4.31946412008314	4.66600841162258	4.27853913145067	4.51455838742272	4.5494890257082	4.6178836683901	4.29325492290931	4.22444380455459	4.13873959464836	4.2031198934525	4.08323657073649	0.235340563857542	0.646271797413768	0.359347422256207	0.384225718213574
ENSG00000028277	0.135717806026198	-0.0200967321464676	0.00478879386394215	0.54537640262386	0.298110858207055	0.992654586371694	0.401257879262465	0.757458828888553	0.466394478071101	1.54081788980276	1.01576902309231	0.493749036282372	0.532877117462646	0.442428046856679	0.186254994717294	1.19861907474699	0.539186583843982	-0.364677757001543	1.5532475370567	1.16551941411404	-1.08753958656206	5.51085622929691	5.425860279897	5.03559284428816	1.54608057740591	0.44484713917946	4.82984406147773	4.70539763145304	0.439268429669304	0.671564697847376	1.01466283112826e-06	0.590347554448306
ENSG00000028310	2.70179873456025	2.33382366313266	2.6576080294327	2.45773475297724	2.31636281707469	2.50728536323771	2.54290413617516	3.30800769686761	3.0498006655577	2.79008740357472	3.47718386932933	3.12010988901123	3.49584430294474	2.93762925579003	1.88894913739063	1.90078533345568	1.98686121662396	1.94858085347693	2.00849125496651	2.13018394902341	1.36041295845146	3.00425854921313	3.0504829264448	2.70812707313689	2.86730325009469	2.732367226656	3.18772623699221	3.1382722892118	0.000337172951172747	0.00478095776872756	3.53707869314636e-05	0.0119850172334395
ENSG00000028528	5.65513452028125	5.68082411906245	5.59863238342799	5.62389616872381	5.46429359262844	5.46043209991969	5.60976424359493	5.31920113845686	5.22641256123144	5.30695427298725	5.37795341610135	5.19040409519233	5.43638561032086	5.23280561390706	6.67209580617991	6.69010223761403	6.3307427659551	6.47115070250232	6.63382222068874	6.55190470166584	6.83054231438032	6.44923948850647	6.39371473238141	6.20052311583489	6.69675839455779	6.97580047799036	6.78782704187558	6.54006762221894	0.0254070813775192	0.152798662125119	0.612398265915117	0.215818257103288
ENSG00000028839	4.40882054265311	4.12930067363982	4.51470732261305	3.89642199426345	4.24630751950662	4.07858629944046	4.16092152042684	4.1627209907005	4.18036822091147	4.03102922557854	4.05882670251882	3.7791845664507	4.20213362769974	4.06579667507664	3.0841135859069	3.09080259868325	3.45157525752169	3.21014711194235	2.99369212793405	3.24070335623846	3.1437698639873	3.60873172287268	3.67787154695676	2.7180652220228	2.95418837284655	2.84384452032221	3.75399873898988	3.58553524714951	0.338733680710703	0.358735122570571	0.996460569222512	0.589454697955806
ENSG00000029153	2.22780425842625	2.00187867899067	2.02720792051603	1.22172388674028	1.85280457781084	1.42154223538371	1.99541005722267	2.38415008062492	2.44267970690583	1.91398485582478	2.73345907358912	2.67588005998133	3.21076656839002	2.67326623477455	2.7433604602892	1.62816996917306	3.19069660075765	2.66072144322089	4.70400131374377	3.67911125996806	3.06785956519449	5.46020280197797	4.97460227196125	5.30052170450504	2.29906055078565	1.60298585481648	4.67804932825824	5.11425296188346	0.0961618109212655	0.23743366322939	0.328806019173725	0.201497561649265
ENSG00000029363	5.26534619749949	5.59404879903358	5.46573590345282	4.98659967441855	5.35430882118121	4.99666182972608	5.37461545420349	5.37018396077678	5.47043132559328	5.31755088027907	5.29461851231836	4.80541358982335	5.42981966990901	5.52160230485074	4.91803016360114	4.7299812880306	5.27565807470846	5.06626171618032	5.13801771366541	4.87778548227429	5.09668594039212	5.62548791811779	5.41140971290996	5.22576298006235	5.2554904873417	5.17979503816894	5.74459364617996	5.703095442278	0.747722666519457	0.341448787941908	0.00874500698353242	0.440390040384438
ENSG00000029364	3.45504532402485	3.62796756308096	3.53206414538175	3.4765674872379	3.51110992374813	3.26852330016459	3.44344609228325	3.31233914592589	3.54417707127353	3.16747873907705	3.49956680260788	3.52233663525121	3.55664140467455	3.49769237509725	4.54229934209088	4.54306797794854	4.39913848991733	4.36881984798025	4.6301924590208	4.43800122575398	4.47923405897506	5.14496771773678	5.24279590991137	4.9156733100013	4.44455981195213	4.13170306681204	4.53019967323142	4.45100068294601	0.970566250408223	0.914670465953316	0.493100989186614	0.471639752671192
ENSG00000029534	-0.366901171342836	0.701821531703465	-0.233628849913379	0.449508885569933	-0.548466884369353	0.40956537147526	0.0535636588328066	1.9215267761999	2.59225946279587	3.33102124009745	1.79568752398321	2.15277374055237	2.46538982308083	1.63095469788099	-4.21223678316816	-4.87871026060957	-5.00890245657623	-1.72393330759945	0.193973837526199	-4.13267995847133	-0.117811558961693	3.13603639585058	2.02109146114404	1.11514870692052	-1.00647976805495	-1.47429966742673	-0.570090966372548	0.620439478221348	0.00381152474881692	0.0558511704834595	0.0261712422281721	0.524826674949445
ENSG00000029639	4.00554950398508	4.02871834847752	4.43508225049929	4.5752181338475	4.28364987376652	4.3451856314784	4.480554392365	4.64850472325617	4.86558652619357	4.48490957308437	4.56185162435114	4.2654997155324	3.45538966289152	4.15148998022915	2.03847186136988	2.15348084381726	3.20486502454793	2.41908863268439	2.35665869217013	2.15432856098815	2.61589962004759	4.16701328529436	4.11884952001951	3.87506050215759	2.20470048181444	2.04228193743612	3.65793988870818	3.69078084737889	0.85460846585388	0.845968921825914	0.0720724427706588	0.778050028004665
ENSG00000029725	5.08565263006971	4.76847137020386	4.60561257466125	4.5988275816849	4.71962961582914	4.45236942662122	4.63877161495277	4.84581938183342	4.52117882530954	4.47860519394295	4.91674917602178	5.02657614073914	4.7090941753597	5.12444110873196	5.60258689518311	5.51556361389359	5.41115508410478	5.25346443242592	5.04693182180942	5.59993251341063	5.23986474465322	6.23408649882959	5.81101623016016	5.96042803734085	5.51264325579744	5.40252482917738	5.93215129299795	5.56224928708699	0.360640143647304	0.320547492351759	0.0431318828628421	0.842666017695204
ENSG00000029993	6.96695370644129	7.3242358671375	7.26829925229814	7.18146632813987	7.18619123600496	7.10924482760936	7.16836119913206	6.81238304174684	6.86937232949858	6.89891538526015	6.9988136879616	6.87369863931261	6.49484078088608	6.82747241283819	3.76011049614428	4.01003267526702	3.99663268933252	4.11850109800052	3.65894788707066	3.87694434994538	3.36487107115134	4.02543435381357	4.0135557512889	3.29961627661755	3.3762679900445	3.51688960262347	4.55849246514061	4.89632413790844	0.0932717238637506	0.484788943117554	0.843921954120029	0.407016633398157
ENSG00000030066	5.86641885845196	5.54610850871235	5.50141027956311	5.29884166092007	5.5073225952602	4.89731168002675	5.49213255472446	4.38859690706815	4.21474331635746	3.6262704874051	5.25784832368907	5.0400789516092	5.33256213893018	5.484477504272	3.73487548700677	3.47483776357928	3.4158082175718	3.64717857016622	3.68766939623362	3.7581546770739	3.57610821372573	3.67633113075076	3.5695198225566	4.00107292870782	3.49312642899047	3.34369965910555	4.72082920252429	4.45005179196405	0.0576221065322695	0.602170969642533	0.709704178815572	0.789131105852087
ENSG00000030419	-0.722412096159796	-1.18181832275245	-1.36613196706942	-1.59142050082009	-0.86442294452036	-1.19711555087684	-1.07412049936801	-0.532494762014692	-0.662213264381108	-1.22408884536759	-0.657098861223738	-0.575417385956688	-1.61761649060209	-1.19865389971622	1.08237035990811	0.111738583085055	0.827635989975195	-0.855968460797442	0.976154516540729	0.260939401806792	-0.90753635462617	6.29343030879157	5.49927076044513	6.13350314786141	-0.620536407279528	-1.14543305193961	4.37585854559336	4.78636464246918	0.731673871689974	0.726962329919285	0.00175052308946508	0.459446370783313
ENSG00000030582	5.83091770343569	6.02421822537074	5.91859577406956	6.14329714221242	5.84590585310406	6.25098778009052	6.08939236975818	6.45451676274346	6.51907145143844	6.94826151990674	6.35763518565491	6.05381254701892	6.35668808490185	6.14185060607819	8.27208277579971	8.95151073532627	7.91692880716103	7.96975294507176	7.75836385768141	8.28438511449256	8.54082625095104	7.54475858388975	7.76938739794056	8.19359089737007	9.10652183130447	9.44322754978674	7.58496130441079	6.63620300902571	0.258907387167759	0.750820977899605	0.451034041501247	0.00749774505079705
ENSG00000031003	2.41433181209374	2.79947801259102	1.92281665917335	2.03299808250799	2.27699255478248	2.05112656469544	2.41644280618572	1.6113975797366	1.77618622899435	1.62374214931632	1.95807031942665	1.93412368194095	3.00166360057768	2.25922799541	3.53151905881135	3.57727408637033	2.89489710583125	2.75504948379827	3.86307802611837	3.78847618344335	3.38158409337659	3.24686228366795	2.89791220475063	3.08417729713698	4.27634453710876	4.14360219936127	4.0692574561394	4.10370866689394	0.527257104722936	0.676980204423199	0.122739125340707	0.0759964615803962
ENSG00000031081	0.33715934836586	-0.0141868052389813	-0.440705370472189	-0.00449146320490623	0.059545847423816	-0.101976306477195	-0.799792202583448	0.546471470930296	0.333796320724085	0.208624937894696	0.538969155294296	0.289116396474314	0.233881684787541	0.849813792143462	2.79540754223348	3.20492165709579	3.43044544538032	3.33870733194418	4.58883483147911	4.07999573542758	2.11676295768878	3.37013402907165	2.97395508333705	3.17757671735278	3.20889691149798	2.86778274112373	2.83264118782071	2.90469318493489	0.356438571626476	0.608135891425142	0.249017622186248	0.571929095766724
ENSG00000031691	3.99167797471678	3.79061406849624	4.07507355558772	4.26189643680439	4.10230178302891	3.75032353871094	3.77396505001344	4.2705242762257	4.17223320113749	3.51636598714761	4.29071518677663	3.49840718609841	4.03380499978146	3.46530948776232	3.87582724290959	3.55352631167487	-0.00800229505477867	4.13977683695171	2.30678130898195	3.49225734283842	3.88404808022418	5.52537651306668	5.53335944248117	4.32248766955565	3.99084648070929	3.10188635792556	5.66569349190358	5.58983224846451	0.93128628661511	0.952055674648588	0.0212642414948988	0.722583265942777
ENSG00000031698	6.34766963829994	6.36044680790893	6.41105239113989	6.44874081823044	6.599765352117	6.45491076703596	6.34130321532482	6.54719187773905	6.68085805056752	6.70294277440223	6.57406898853274	6.61874312927543	6.87518443457478	6.6240168288287	8.35760074965986	8.43808266520531	7.67456229636839	8.03470986135435	7.60087331631306	8.40618417396447	8.39937636780496	7.26715958641635	7.2683039909401	6.40895641748934	8.12815120164171	8.09322201656163	6.49477789327163	6.59382227530566	0.313679266523958	0.675574716940118	0.000430160440490225	0.952814593828126
ENSG00000031823	5.34201783559374	5.50713781798822	5.55932079761799	5.56086476350548	5.38402095000227	5.60150450976857	5.53560325836829	5.3724999299101	5.47014327720612	5.40469779137671	5.29298378071173	5.14304502160023	5.25714089100777	5.27136110880394	4.70645074389995	4.78303903639957	4.90831098283603	4.93165722365687	4.67461530539566	4.75121505289211	4.97895952508823	5.01290579217397	5.04245681777613	5.12144163226448	4.6819079975788	4.98217126773165	5.14863869095773	5.2800131594426	0.0257616257543353	0.0635185495621279	0.0924133081267596	0.954771022477298
ENSG00000032219	1.60700975182762	1.75236270933172	1.38492048524215	1.39504156221967	1.57302855207642	1.56516540817068	1.53549269210868	1.56425562302813	1.78152484479256	1.75734051204861	2.14474260696052	1.59198931677853	1.79911443862848	1.94288075674411	2.60164325699967	2.6908858442252	2.56827785876941	2.20313841602835	2.4630787506002	2.56720718301566	2.16896297293599	3.30238698389325	3.03389696964708	3.28443927820449	2.68020136071446	2.41197095872512	2.57783253323924	2.56907796027436	0.2173925618508	0.38591972361771	0.078696459336553	0.851933691142281
ENSG00000032389	4.14626311235569	4.44575372820778	4.38434400649019	4.64209452880525	4.39834085292823	4.54184183758957	4.39108262019077	4.18333807850238	4.02198178333613	4.31792263975607	3.96045753609181	4.10685569886528	3.96654389160085	4.08703052218998	4.72341256480258	4.63746963843714	4.74868005067075	4.73603477803181	4.73304875264077	4.73656255183169	4.94624183893185	4.46041086846277	4.64458329291158	4.75136416205411	3.53276317156267	3.51906260160027	4.90063820064316	4.89415633320517	0.00758660054277065	0.0632649859162406	1.73044413526692e-05	8.2141874518946e-06
ENSG00000032444	4.1854341306676	4.5313445067	4.68951251789623	4.3610730604281	4.63042944686815	4.81226063824624	4.59576895815468	4.88839364790807	4.87095823825156	5.00078371673797	4.67888052998403	4.35634452927592	4.8913629219189	4.78144253712406	4.59726649057528	4.76320984292094	4.6068900738705	4.89659839560599	4.90743545551646	4.82278223632303	4.79694202706807	4.87652593837892	5.03198683035404	5.14776249668786	4.61445484544352	4.78185393977664	4.73864944430764	4.73572902728257	0.25420397005566	0.91127974997877	0.802852298839043	0.787629206755448
ENSG00000032742	1.75212270945277	2.03300311354938	2.26118364117044	1.2527616052357	1.87588963110942	1.99491763048185	2.40224931356289	1.02574992699754	0.901796276442983	0.991686633223056	1.46384987893326	1.01992994887266	1.90864419540947	1.70678800074626	3.08811011678876	2.90441720715354	3.18864149426259	2.32876383307016	2.83920720083194	2.75830124687339	3.60340194945345	1.44387061593359	1.23749702440513	-0.218168771102033	2.60652981713339	2.44637535796448	1.49028391865706	1.61568992278949	0.0747077656276453	0.280239720514131	0.000259863978015398	0.469547684022241
ENSG00000033011	4.87076637527935	4.58190480361433	4.68488652892394	4.61306948478772	4.49921852664695	4.37836650265112	4.61890991561095	4.37226455957046	4.03703156673132	3.80542476362197	4.62428632816338	3.8683034374837	5.30248116638059	5.00214713681332	4.7320713100373	4.53461959844646	4.4133367131128	4.86182280378722	4.63772263340251	4.57564808006933	4.68971582875198	3.44001856130148	3.70106159223993	3.9425949370201	4.89005521003692	4.73399484744387	4.74871658788933	4.71593755373161	0.482449694158382	0.501584310672739	0.462142898814232	0.775724269087894
ENSG00000033030	3.20964070369238	2.91188944364964	2.75026807036253	2.86421810949624	2.79039440211644	2.82816963056501	2.84628243992262	3.45155102533898	3.67965275297594	3.74126018391974	3.53149098448207	3.62767969032618	3.8070072553168	3.63714973560023	3.11770314658625	2.92355287537593	2.70239172635807	3.26892717095008	3.329294541331	3.23162752321464	3.28205278162972	3.73719055955468	3.94169479106878	3.50913819351557	3.09877110739946	3.04737815870182	3.78638393703941	3.74407611752274	5.19406413260976e-06	0.0013084880112096	0.0309802183526157	0.868620347534718
ENSG00000033050	4.83983406432221	4.47947532222277	4.70202989347402	4.68171017407883	4.66148935617419	4.68935373940051	4.5938056370761	4.33439971006691	4.393451697865	4.17651571271833	4.37232423977298	4.19864893097262	4.9275782207451	4.5480394045036	4.94827764010373	4.88647857590056	5.13262810413761	5.18792981003299	4.883254883279	5.00918463668335	4.91303653116625	3.99738021580673	4.1464652755489	3.88130487296269	4.55815799787632	4.70459062608756	5.1402222229521	5.05404869154894	0.223709542926955	0.330131381896673	0.0203452570374076	0.35409860448839
ENSG00000033100	2.90503183710922	3.19082333618521	3.2097847298392	3.41273482397779	3.26406413352113	3.42493197276328	3.21766104923349	3.54605726288611	3.06911514195088	2.93007771088619	3.48921318375564	2.59008623075158	3.19065303189586	2.65784468025488	5.51446016063878	5.75569793703151	5.48510811095278	5.51711094446298	5.98623464970312	5.7143195878771	5.48247556045836	5.05722964242179	4.86156895978336	4.35429356954523	5.61668147846912	5.94530035067498	4.50377854007095	4.49687811134239	0.471119468041849	0.618950748931282	0.00839880688981427	0.670355592589011
ENSG00000033170	1.67595947030344	1.16778458670886	1.37304248994816	1.64641879317689	1.51133032893405	1.51067968560509	1.69595471999495	2.23348804746974	1.80545743210052	2.53475389716095	2.04803796906765	2.58798946824175	1.62467411768833	2.21881543211868	3.790878429406	3.58347109390788	3.90230469431931	3.1232383964799	3.47357056310766	3.11008650643632	3.50822794742429	3.20203979343715	3.76556576830561	4.27905109558642	4.79948025386078	5.18300198522988	4.86348680772066	3.82432699883384	0.0463566669362944	0.121661510357115	0.00011376406645013	0.00024008943123669
ENSG00000033178	3.71501831601665	3.68972802384527	3.28386441650983	3.17224090146999	3.271557192491	3.03380318850011	3.29876747778102	3.53990967458707	3.48729523558547	3.4615564999061	3.64380919718744	4.06783024458962	3.95069475304493	3.9299339126302	3.55673390270865	3.43989561749233	3.43692665106686	3.43177163478439	3.62186920026531	3.62240827041058	3.07344447014701	4.72885951966183	4.24554727289449	4.6401334232973	3.74012847304188	3.24113341962574	4.25352318583072	3.61340109985154	0.0534548621331565	0.134319887574843	0.0313951309962356	0.94778120529376
ENSG00000033327	1.14478609119308	1.78384703216527	1.09233039541808	1.0174224996344	1.02560596462274	0.745774560803687	0.779338365926927	1.41308566775421	1.3993253875119	0.821057452138345	1.88053145547032	2.35765577215507	2.03167449954863	1.40286494242681	2.37433941560963	2.25259909320453	2.30054184587252	2.39328811804579	1.83193966773106	2.65592398123846	2.25676526823896	1.2684529551925	1.36837566845268	2.84816098164278	2.12117746979078	1.55056732560842	1.05164807168967	1.07160723322046	0.0581670256193068	0.0459153540283209	0.0413897255529104	0.448633492597003
ENSG00000033627	4.18986710284499	4.21831374782434	3.99812968862262	4.16369463500579	3.9658682791429	4.31908645156267	4.10250263842721	3.5826627421624	3.43852564566415	3.735638669708	3.80755839404634	4.0644094919097	4.02112842311961	3.75077695650981	4.85319786915449	4.76340268984436	4.47231860485932	4.54262154174126	4.71372144847338	4.68094004226697	4.14129566536988	5.22224201752321	4.95637314413227	4.64074631749232	4.06279963274443	3.87457396927576	4.23308477969112	4.36030919879167	0.107863418732672	0.593360266358771	0.127995214484556	0.047182940924255
ENSG00000033800	4.07996389957903	3.6080225226093	3.44709588942396	3.32706655446091	3.64957108617512	3.30882703683405	3.45454594590528	3.50978199057484	3.543608769009	3.23107387079673	3.59577406567115	3.67056721672569	3.4789200665906	3.74084612816402	3.13420686315846	3.11723995800994	2.85235015471014	3.26634635323411	3.22278087091691	3.2009791822483	2.9232513222891	4.29700273447311	4.23435614114136	4.94256468927984	3.26694373021124	3.31207666150685	4.19393026279246	4.2662643752674	0.94045858029252	0.82849544022457	0.000270212866514939	0.665797529024192
ENSG00000033867	4.37392551470754	3.93959052551257	3.40962751353431	3.22952441430371	3.71751829225039	3.64468450191826	3.60026601392659	4.34461358373871	4.15965154548959	4.41967190928235	4.31248019159617	4.75376114028852	3.94351374465592	4.42963272911424	2.3151748849838	2.22967091304883	2.49983027432768	2.64012201010333	4.21095880893398	2.67782430220994	3.39459816520109	3.12893109150149	2.98653722719044	3.00448946989293	3.81825543406682	4.17662053620144	2.8894785412113	2.98255483770207	0.0115604380971894	0.0491668605568534	0.0153508604651368	0.010499906264857
ENSG00000034053	2.35211933253485	2.86131317161587	2.33774953289349	2.44810873586635	2.44831190166229	2.4478199038641	2.98133927230459	3.53457940508487	2.81856961139082	3.06671481623074	2.98263158046923	3.41448800274028	2.70797676604071	3.03233346333431	1.29239626978828	0.984903543610513	1.54855518493783	1.558289965955	4.21283790801329	-1.08058958721025	3.0411420666995	-5.05535696012257	-7.51521827168297	-7.06462390783398	-1.07749491733654	-2.33460205267354	-4.47725769316521	-3.73263024071732	0.254162669962203	0.420159462380044	7.5979517315176e-05	0.168434679325638
ENSG00000034063	4.85480383901769	5.07349334926968	4.5855914520009	4.4850984096648	4.57523276835067	4.07900423308118	4.5616600684528	3.54497365753046	3.22937386317289	3.4906383852555	4.50041174763453	3.33960669052643	4.4130524339692	4.15398833495874	3.14580398812426	2.63432037782624	2.27457539732801	4.60795516530096	3.36411680030295	3.87484344539807	2.11671180701086	2.79494225097634	3.51250748911944	3.63707549332345	2.75445395666021	2.72251158662783	5.16053707780723	5.29739638882158	0.10787706139604	0.400999911546817	0.853381986548502	0.740913344122541
ENSG00000034152	4.98293486032565	4.80839180579455	4.60494327825407	4.8625877165759	4.61063212866113	4.91838872300124	4.80251897191381	4.49723899484157	4.48521405418366	4.66125699474808	4.46461431364819	4.35381954602542	4.25674174600716	4.02002406890987	6.46962802536693	6.72223116107067	6.05518753684947	7.21341379195224	7.07225985956385	6.8450928916501	6.34914457386395	5.53414486735437	5.20168644497385	5.14477470412638	5.71388863704746	5.7181729546954	4.92304295421193	5.19655638325026	0.061605260325656	0.285549528152513	1.19241571957372e-07	0.00218775429173376
ENSG00000034510	10.1824714376005	10.3672362008911	10.2628769570178	10.5240991415733	10.5084254328308	10.5143952401641	10.5709858164497	10.9319741189836	11.231741805888	11.4273718227017	10.7071224608459	10.5579839138541	10.7028790897076	10.0687500749489	11.704811680673	11.7201390424508	11.7805416486511	12.170773836281	11.7008291924822	11.754767589237	11.6830548619296	11.9129577196691	12.2815150332354	11.4544177492625	11.7292033719246	11.9161040688591	11.1670354882529	11.8073738314761	0.158029482966428	0.641225016403496	0.955052171786008	0.944140330066791
ENSG00000034533	1.886494827258	1.4222196484013	1.35240276676135	1.73508551395395	0.924492597518865	1.63000051848923	0.522177025811678	1.35255677384392	1.54329860519014	1.70910279570761	1.29162852114494	1.1558938984028	1.71554466747088	1.54218389850217	0.757968183774328	1.24996506303699	2.38702689921553	1.04747476349056	0.517355795712513	0.928320601491749	1.00363510915685	1.68923231152134	1.92255147428865	1.81395823575038	1.37972391538952	1.50993206729093	2.10273316630072	1.93150715748232	0.94270166096486	0.820735670545568	0.0479406128211038	0.569492106479037
ENSG00000034677	1.72653713066167	1.67959021611573	1.90121269316686	1.95791664588553	1.62224385646888	1.81129702532236	1.78866928871635	1.80206806125518	1.75149862849921	2.3298543790213	1.87815464239045	2.13496308191686	2.42742032039075	1.97915282936975	4.24515748014596	4.12931761755216	4.25238021130204	4.06303332153372	4.8206649557771	4.28845493616996	4.57304553135688	6.0727411233474	5.74886601551745	6.13497691916466	3.85515784244537	3.82463408236315	4.44526570782346	4.60581359119451	0.611726286087438	0.805273663167951	0.28906811636727	0.374564411880281
ENSG00000034693	2.96804097115983	3.06897589344669	3.10619419220088	3.10780564556105	3.19378472737186	3.10760555093095	3.21001022025946	3.46044412925353	3.15357094176624	2.94330517256946	3.10763995840691	2.83440803661679	3.29001379454357	3.44146374233893	3.77766904521987	3.29679591156389	3.85477358778183	3.60816931167758	3.61594275561604	3.36757063755621	3.73347296665045	3.5345326256064	3.69845288882903	3.36821189512237	3.46086405278756	3.26759507557319	3.51934361237003	3.22887191150825	0.983621162924274	0.631268074133367	0.237066445453926	0.418820968849293
ENSG00000034713	5.76953413688001	5.9362856231776	5.82577125109397	5.90224935481224	5.80134705572485	5.94849308876812	6.0082039671431	6.17704952334978	6.19044446071374	6.18663601378832	5.88550683225146	5.89076090338473	5.98652611809645	6.12969217385131	7.16498371555562	7.14402693768414	6.91849097799086	6.72640431064298	7.27476476570638	7.0553846088913	7.07346096822907	7.43935980868672	7.51795927735782	7.77497429316965	6.93680472225323	6.97584115884729	6.86953752052098	6.43113392061208	0.613021605440926	0.996850920769215	0.82675117903809	0.824490804396956
ENSG00000035115	1.80251265876749	1.90838467305381	1.92923499459465	2.13201881814346	1.97823181895187	2.32027856253693	2.05661206892483	3.01075418394051	3.08604054555673	3.13552231327831	2.60457767280028	2.8566842197499	2.48400702812218	2.10048875791947	0.401493581008124	0.233749474327494	0.540533398712882	-0.419098933111268	-0.251804472276023	-0.215425908480001	0.228386275495842	2.56745688841992	2.61301056686214	1.86240849498818	2.86969113076033	2.98135749587954	1.34816921823856	1.55869407800122	0.00692040226330004	0.0779392111180301	3.01074165989402e-07	3.33511841230292e-06
ENSG00000035141	3.98909674476276	3.91439759227629	4.15051253873291	4.07994183232882	3.6924478747556	4.0090755901982	4.00605278677195	4.05326846640323	3.73875644346202	3.95649422623299	4.01870059365366	3.69434973969276	4.38375563705232	4.31368773462619	1.48890680207932	1.88373312853083	1.57872290534237	2.19922440975061	1.19763484869371	2.03834517191503	1.91403407334526	3.60616006069019	3.64510012974773	3.71849426713542	2.22604391621461	2.69765650762928	3.88585932497302	3.85722746470513	0.957137016234351	0.672015533224471	1.11387628787635e-05	0.144757036437969
ENSG00000035403	7.08448557434219	7.16495452072863	7.17699896120976	7.28880765202991	7.50990368814847	7.42003607649511	7.37098480096824	7.56339930355194	7.73236239085637	8.33469181362169	7.85471919784741	8.57794885385801	8.74680459475342	7.68666255622827	8.22407827294168	8.51293863407697	8.45318435247168	8.40176257794041	9.65599106129011	8.54967845372707	8.57826358737054	3.27489425547881	3.25586318415864	3.68964929223847	7.65545562271357	7.49105460032379	4.00775601652132	4.11477986776482	0.00300628770425356	0.0281273012582366	1.27476725001397e-11	0.0147705017972508
ENSG00000035499	4.80811814878195	5.10478105705766	5.06358616332995	4.89412084229633	4.99953534280631	4.96699969747093	5.02588872683095	5.26694613965658	5.23982662798805	4.99108380182387	5.19647017458335	5.11623226961328	5.1921653353438	5.29687287294505	0.298263312427675	-0.911885148020272	0.540653318811771	1.6896604377583	0.791257629777307	1.27775312873341	0.56420853673476	4.03600644064655	3.73819647098116	4.17018177064464	0.104225014507781	-1.40076598000886	4.55955767954252	4.61055058364147	0.280216650364927	0.601353591801081	0.0225099199417622	0.200248529893575
ENSG00000035664	-1.72136414302573	-2.05692181513755	-1.98130673984452	-1.85126475245184	-1.65620101705768	-1.58032681750716	-1.81839173280394	-0.599049713836954	0.293362905895966	0.563067691656172	0.0350752617121473	0.251618223958164	-0.276131325115002	-0.352126530259364	2.94490914306516	2.09727680622449	4.12198125450719	3.77082771632805	3.33551386702898	2.44812089176097	5.11191885994318	0.104308734664015	1.19699642682735	2.89669160771756	3.18611484201048	4.30635200471714	2.49518471473555	-0.485273437736389	0.182061598966113	0.358513847511436	0.10297681982703	0.651605422824589
ENSG00000035681	3.21821827573164	3.11980550156054	3.02545466092841	2.70602420131427	3.05219031683865	3.10975289650689	3.12856751927392	3.17793890203319	2.98008353598802	3.12028785472828	3.22770100780218	3.29991686491029	3.22695555668925	3.14062695493614	5.03709565073243	5.16006341824618	4.66513041306658	4.21251869995472	3.59414437650877	4.85134678640062	5.03845374193171	4.60978675333952	4.32974065936126	4.70929113171123	5.41754314962166	5.24890984569925	4.47828710687471	4.45416905909068	0.628316508276041	0.68585950626856	0.174057372308589	0.044031165611505
ENSG00000035687	5.36194999763395	4.93069854807156	5.26866413267692	5.26401950092885	5.09028257576013	4.99498213089023	5.26367964632607	5.09220515263763	5.36145522067551	5.14092991341101	5.40874312673513	5.28238694129499	5.57424438269994	5.59377934691372	4.77022312441981	4.40007569594949	5.09258746006605	4.54609412245651	4.57575439666753	4.55520121971656	4.69856107180263	4.47082474049749	4.41559085274608	4.37346992671549	4.68224965567502	4.59628555636801	5.08796920107804	5.01671837042978	0.294577184230497	0.569857171209797	0.966348967418663	0.974810346586398
ENSG00000035720	-4.8094483367404	-1.84768882386693	-3.59955432428795	-3.39567309534294	-2.35709995434999	-6.18406637167281	-5.48526578178267	-6.82722426814492	-4.88228399608921	-6.5645606232287	-6.17192006403648	-6.66617819318541	-5.90464587634277	-5.44404032261266	-2.67684810329769	-0.986974601335297	-1.52279318210769	0.277755404543736	0.550037748491816	-1.96744481131228	-0.225265205042425	9.70974469878881	10.0093829368663	10.0094453937149	-2.96844913559069	-0.598420219258702	9.03329271240844	9.1486432486981	0.0746727985374311	0.231275406252363	1.5198797484123e-05	0.744331372575747
ENSG00000035862	4.42823356564203	4.69431625468354	4.73050980087954	4.56729674893611	4.60268313677669	4.58400629095438	4.62585570554269	4.03558765881072	4.21743327485449	4.64049320956866	4.53656813225643	4.12809219145917	4.42094392265298	3.5644590354316	9.88015555962348	9.96602319786686	9.64822370427594	9.81875763774953	9.99310690552993	10.1643792522232	9.8209166270418	-1.43315639582502	-0.5110438660861	-1.15244888468251	9.95959923802276	9.85252874383489	-0.363015433298084	-0.703478090473966	0.0568842531277017	0.378838793358529	6.34824638201325e-17	0.986470689226692
ENSG00000035928	5.18228764736374	4.91296328163196	4.86265185571866	4.83422320119695	4.91411159188836	4.75022608390112	4.99370830404351	5.06816611214033	5.08688646020159	4.81160422005043	5.12016936058108	5.14950860159521	4.90633225561389	4.9777394435496	4.43265543797416	4.2519222310302	4.39175948717681	4.70432163777343	4.31439836771075	4.31434432920714	4.70088583711965	5.47713305305754	5.61123085422832	4.90161743143935	4.28548870422419	4.00613800979137	4.8888341120368	5.10648005661011	0.406743049625955	0.41162084589935	0.101562990630132	0.280897294821695
ENSG00000036054	3.00356215993353	2.85036682545031	2.76342632000385	2.53601066776519	2.60538842189273	2.45046804907232	2.69681943591991	3.03814590739368	3.06553507124451	3.04744913238809	2.8829550908256	2.92111948730255	2.90788399001443	2.85769092976278	4.18117303246466	3.92732456222529	4.10416516977754	3.81911655272968	4.66838981016054	3.95485257383418	4.10571785746024	3.5880398701144	3.51448686224735	3.27098870528577	4.45811857231903	4.29197061450408	3.20012677742562	3.24667413318782	0.151070034996046	0.502452272575788	0.0841676916349834	0.24067528315025
ENSG00000036257	4.25899341829826	4.06923828209246	4.22369366515299	4.20820598507086	4.15923611224203	4.12364474413145	4.21322793469136	4.15862187610484	4.12713608899032	4.21313866137354	4.03694661658921	4.08515849905655	3.914653700739	4.08140260044397	4.26675821491274	4.32031693178823	3.51277506350882	3.92370110033236	3.96298956389837	3.95408914299556	4.04608268606044	4.44060110765746	4.21379004228718	4.03261794936568	3.80619089208186	3.84988957060196	4.3872542437017	4.37901842399249	0.475799708765732	0.64092672217327	0.636001452626472	0.471231937882854
ENSG00000036448	-3.33627625570399	-3.45392801409761	-2.63600985955536	-2.85356341647571	-4.00597706732066	-3.70290298565933	-2.37626137209314	-3.0360818945378	-3.76858383200447	-2.16153469824651	-2.56266495932634	-1.91394328872651	-2.61846644321618	-1.96005444346446	-1.31430586143287	-0.71038915338388	-4.39289218216429	-3.65472094914289	-4.9540639559616	-2.14040170724716	-0.173428366731145	1.34738384114518	-0.506503706705337	1.69985811916263	-0.272263067096122	0.291412516007024	1.52252908079276	1.45236959024213	0.56031262455405	0.642471001441406	0.000632693265268385	0.0606558305112215
ENSG00000036549	3.52726908867176	3.48715322576305	3.39437199660241	3.25323346949417	3.54613726199524	3.18300905316625	3.40251607362612	3.45805256382242	3.339006279051	3.3240299992814	3.60288796681239	3.63479206134137	3.67962144558074	3.68190902385901	4.20979837169297	4.25700470280966	4.00478932648465	3.73627702077243	3.92547888155194	3.9579561293741	3.86180706120376	3.31787147329031	3.13344604105977	2.98512077634649	4.21208834889893	3.90573114431066	3.43474717352153	3.29204770112885	0.239886682972197	0.324816589834894	0.00444438956016807	0.806069216844497
ENSG00000036672	0.757453000875002	0.887170904682605	1.28958339127753	1.02808055144564	1.32279396328285	1.35548734142498	1.61809365887451	1.11309756242403	1.01991107208654	0.74547543008166	0.974914771037273	0.774945958533827	0.57687496711088	0.758598880889342	-1.61864099442379	-0.581237437290835	-5.1706092729376	-1.88691285900165	-1.01159786255309	-1.08284745296447	-1.39045238938517	-3.95823072019856	-5.24597926562645	-6.63742311756865	-2.3658906067764	-1.08920191909823	-4.57777575268615	-6.12417697678243	0.373829139396857	0.649179712607108	0.0111102239526709	0.987529148272791
ENSG00000037042	3.50697143590949	3.44072120507286	3.40620108350774	3.81879166636382	3.33832210182586	3.91068433940127	3.63283351251568	3.86208081538789	3.74837367279237	4.34222578307207	3.63314802054711	3.52859109435108	3.27335967157309	3.32488447452137	4.24777508376329	4.55159625073091	3.46961874552368	4.2449998365488	3.8676756444778	4.30095924601273	3.8621552373738	3.90975963880511	3.8149559813309	3.63121915719691	4.26934379909524	4.46640097452945	3.71718099770824	3.36547271750111	0.874529832372165	0.983346559957965	0.748042902074629	0.553937139633008
ENSG00000037241	6.26612835037229	6.23794086568693	6.58996780877482	6.82485781177374	6.44286080316396	6.59090338939142	6.49385935111496	6.42065628161385	6.34755933449932	6.31454540724562	5.87682169247668	5.7997768910177	5.88608315229792	5.90666114980198	6.41491790901242	6.23364631621795	6.53444388077689	6.73481239164711	6.58754253072824	6.30920695615966	6.230467183738	5.4224461371283	5.8589652153637	5.47030580087066	5.86417341717718	5.82867750154454	6.30267414286	6.22453662719198	0.016855048661517	0.0500910594208731	0.0037365911393185	0.122033076741523
ENSG00000037280	1.66702067352614	1.57949363442523	1.5116679593465	1.4431939774698	1.33158617271539	1.71077920625364	1.08062342440529	1.08223112979656	1.30922849565872	1.40333733982305	1.04144929120559	1.09603534939677	1.02541049901969	0.717418023642632	-5.73289996227362	-2.90943939737827	-4.7579354832865	-3.9806189457292	-1.34882000977079	-2.55604460601597	-2.70772641283927	-3.77291800773658	-4.27583562156835	-0.372981441327286	-3.23448560576019	-3.09069623997787	-4.8624926300204	-1.7777829323658	0.288857969669606	0.547579621995567	0.755425837595678	0.908922190156817
ENSG00000037474	6.37898306233707	6.36176022815348	6.47067042824248	6.38930912632594	6.41446237159663	6.3637237977322	6.48079681181992	6.42477817456803	6.50836353219941	6.306919990538	6.34257139022095	6.06165064584092	6.7592143518076	6.63008659223109	5.50930504275928	5.56126057150875	5.52458862445827	5.7347969785523	5.61025852529882	5.65966614228334	5.57834569503696	6.25161469175723	6.3652026305944	6.06653364652348	5.28428895646468	5.19171161530717	6.74104087545026	6.66158242259601	0.761569821281648	0.3287528796935	0.0626803520652886	0.101027004499394
ENSG00000037637	3.36243848117982	3.04600781300633	3.20330857983684	3.19705120624837	2.97719283042553	2.91144869780483	3.10876896404578	2.53492507673745	2.44790829378276	2.54673795616164	2.65358049729607	2.49261502076322	2.97669838201407	2.83311249741634	2.78800149041956	2.91501642842561	2.85497905147632	2.69871707271856	2.99161354978061	2.83890957669545	2.94816187392908	3.07216091102976	3.08613885221084	3.76604466468872	2.63162560902127	2.62268164484754	2.84349823432827	2.76516330820628	0.00567165110761685	0.0548278149771919	0.935642246090621	0.500089663563856
ENSG00000037749	3.16505576700493	3.26001840755493	3.15511603756633	3.02443675525912	3.27882802332643	2.84227328954636	3.07842504231837	2.83020260025627	2.84163405631606	2.84893655778934	3.08530140809905	3.09458827524798	3.37367812585206	3.15709032104874	4.0705292629749	3.94694384909835	4.32173859380225	3.67830535822587	4.17384283733389	3.92801831131329	4.02083537581222	3.13158133259145	3.0633796816496	2.84333736172384	4.0519229247485	3.75128472832542	3.08486989379641	3.1829238253621	0.731778612437249	0.953356386030158	0.000134029076985351	0.690885920647928
ENSG00000037757	3.82576810262756	3.26986982123457	2.90031852159896	3.3500530299691	3.33336975071032	3.40700110565264	3.37373230465854	3.86752894863116	3.60897524266314	3.78867675954164	3.52902250247817	3.60159540846975	3.23042192432723	3.62937892849855	2.860052689405	3.50402429524679	2.92806440683426	3.01837437617278	3.27019561544369	3.23493922840469	3.08021438849484	4.41711578453918	4.37170483048162	4.76971094000956	3.55634327789133	3.8447540985675	4.70952865398332	4.8312372738683	0.260691404549807	0.576880040771148	2.32821357822566e-05	0.133398584175334
ENSG00000037897	3.88059064298403	4.01183950972956	4.26483645556537	4.23437981012183	4.18405979178487	3.98643719666407	4.05126035657589	3.93547705250106	3.85123738843068	3.96278693346536	3.95324223012963	3.35418118613399	4.52464769862507	4.26728865194757	3.24493919180966	2.81511935651934	2.98578872435851	2.85854275158039	2.92164886868414	3.39566703487318	3.30180880485072	3.2115616053084	3.56085357551341	3.46649003759942	3.10540645252327	3.24690379956913	3.9490929385571	3.99510787896791	0.278821084140839	0.154878331785796	0.182866409354969	0.892086062814684
ENSG00000037965	-6.09607578217457	-6.57573722498673	-6.45731414135227	-6.25589632779458	-6.42778393228005	-7.42216636857294	-6.74105338355881	-8.0326843490826	-7.67912956024007	-7.76916874943407	-7.38898044462244	-7.87795254681596	-7.14750424276057	-6.69734437839649	7.74545030752291	8.25943300513024	8.74872478240337	-0.169738592922559	-0.788881297188648	8.01324888325968	-1.07624828212374	-2.30354443300754	-3.12390181458059	-1.69673401386168	7.40412155097795	7.61203725348779	-1.9836001279113	-2.07059320895078	0.926012702743209	0.956997133252551	0.465485507741144	0.214388152548366
ENSG00000038002	3.75669455510775	3.9241896011644	3.84379181222237	4.01380907337471	3.79932789455416	4.09168109318351	4.33995840147472	2.36242756377245	1.87460106791413	2.12465493444242	2.53194288818154	1.80892100627951	2.64783850752774	2.51015177199667	5.10041481428048	6.08355882621612	4.83258033387001	4.83592317493896	4.46735979588818	5.97629300209951	5.46116676395718	3.33463845860204	3.26483413083302	3.42587367631483	4.68513034868423	4.42899859276763	3.17268338101829	4.03715966416633	0.000252219478334614	0.0176098093438623	1.55239484485378e-05	0.119020259585779
ENSG00000038210	2.31477412138052	2.53424082201376	2.63194895849059	2.21944398743675	2.40836288487349	2.68156675769518	2.82096012845734	2.68479317911908	2.52034418271442	3.01894687020269	2.67488379479153	2.78970490757454	2.55941735120384	2.60181907222615	2.59493465967244	2.33644183161241	3.01904098951513	2.78300563754483	3.25596516225207	2.70326372036619	2.8136616270006	4.95236817030316	4.84890516229758	4.51162916364498	3.42883509349943	3.0671113185942	4.39076851083714	4.47492637300483	0.351344454198894	0.530719319579625	8.53679848116075e-08	0.102268052627408
ENSG00000038219	3.60877615081745	3.71841298966866	3.50600464032233	3.32063252557296	3.49333675539165	3.48207425979676	3.53506621258741	3.60200015716295	3.48208678907791	3.29642645890423	3.51466055721138	3.43052225197928	3.73586289028743	3.50936752771158	3.22322695256137	3.67946941380681	3.03298977086112	3.12339522391307	3.33116199959307	3.40034140530834	3.27952653069509	4.32392762717795	3.99810857758419	4.06873698531583	3.9106558439801	3.6800327288286	3.74979109779083	3.75618591133869	0.893509792476433	0.870405287391041	4.642894896746e-05	0.0246344694818617
ENSG00000038274	4.61820480385229	5.08030821102642	5.18767614002235	4.96503853987795	4.95833046760908	5.12429426332092	4.84150822940691	5.01916267217373	5.02854267063628	5.28678876683998	4.821192708997	4.80745729462559	4.59288075945724	4.84409061766677	4.68792306065385	4.9133900671755	4.77252410161973	4.62660786020186	4.98004034548112	4.66769168899718	5.06175383054589	5.74025275736555	5.39492703145795	5.80630044396909	5.09227159572399	5.10565525216416	5.31767389675013	5.48776301312827	0.614203659842617	0.5895533985271	0.000534813396660293	0.258716524710208
ENSG00000038295	-0.32515706122064	-1.40767886068222	-1.01884794644928	-1.70224175020072	-1.14355778122697	-2.65300130962059	-2.69944866824911	-3.38552366835774	-3.10856405252001	-4.88377200016883	-3.40503838692404	-3.56497007686814	-3.64351502662771	-4.16868852304715	-1.36637700945367	-0.329121455272826	-1.55413982441074	-0.253759245621284	-5.0205978684305	-1.72884636647814	-2.97704575521559	-6.19660330973286	-6.2888511920932	-4.97939728885149	-5.74530109930645	-4.08590362907063	-3.02553608839247	-5.16211787817739	0.0179664736965194	0.209428152999585	0.00071845609720121	0.0611515552336407
ENSG00000038358	5.17308569464986	5.12296225315619	5.08208500955638	5.01837853887147	4.9821319958601	5.14144599129839	5.03024446526051	4.61776072010684	4.59367517426637	4.61830762266532	4.87939939065418	4.32328184991008	4.79009586318794	4.60872553673974	4.36699669713176	4.4396517151461	4.6265677733144	4.93100287132826	4.69773368904893	4.6122363109248	4.38464014259785	5.18353538271568	5.14838562850521	5.42656824137623	4.17702480233006	4.2429746463583	5.2816602541608	5.28141053058787	0.000326015001102262	0.0106277773766604	0.172906195305083	0.0691344930955174
ENSG00000038382	3.54568417898363	3.45657724830079	3.09993714505901	2.75919596338402	3.01276564446655	2.8784319389661	3.00766581703313	2.99291374702657	2.89560366676836	3.24309843242322	2.99958506877054	3.32745078772259	4.23427869744594	3.26191708004306	5.19197683003348	5.01767860336116	5.34355170650279	5.3742610976966	5.87762139873063	5.34192479916889	4.40407367504351	4.86791423797245	4.41201535464682	4.50651346303014	5.30771647142736	4.98576833876655	3.4020614328974	4.04274939249521	0.715969356396305	0.941530146152302	0.0527297879357937	0.908668463830689
ENSG00000038427	5.13292281476244	3.9478002467794	4.08775208079148	4.67127769772601	4.88658584739908	3.70801711198012	4.45167413657059	5.6329383573737	5.05144405095367	5.42204431985756	5.73593104206243	5.14594340213982	6.14029880143293	5.21927184094364	6.46971979739313	7.17139872969294	6.6273697278573	6.42524668430688	8.21150011842442	7.85604785772868	5.72042008907273	-1.83525771646604	-1.69551932057027	-1.7596636082983	5.7152818056189	5.4920134093708	-1.71601968259353	-2.6775418271894	0.0115884111304871	0.118985835338877	3.7179943103414e-10	0.0359561806907346
ENSG00000038532	1.13377506438446	1.03513550133874	0.781220009409736	0.862280562930892	0.904567012158774	0.463776898635751	0.806393099466433	0.857857973617115	1.01726693370229	1.05312760855605	1.24854117463256	0.944011507464087	1.89881385936898	1.19465511028185	1.45961687503436	1.45372638789301	1.55224866901677	1.73523314008904	1.75395959647729	2.00474023603123	1.26465682576439	2.96670692512764	2.54518996450632	3.32966539222844	1.24731597178711	1.24108599749809	2.5011624759929	2.33638014529445	0.308484786218595	0.673913758510267	0.131086266099692	0.437286102943464
ENSG00000039068	6.80202024661023	6.34478147414704	6.48247318561996	6.33936096822043	6.62145591557624	6.19854562825816	6.75435208155658	5.97440637778556	5.80927077433597	5.94699421006341	6.57156590738716	6.46793072932174	6.78423821140048	6.63016155920849	1.04568943823666	-0.34511594331889	2.14845334771405	1.10303489972716	0.373912076535363	2.06714113009133	2.30432975200311	-0.688321684398337	-0.932095979530363	4.57938131359749	-2.65293056433521	-3.41400593444342	1.33349223134101	0.0998006489556338	0.760757586838716	0.98529837279785	0.0640143884239898	0.129905913054074
ENSG00000039123	5.56936867584705	5.67647807307527	5.71913178861673	5.67323347772576	5.77827906722737	5.59627663845261	5.68310901535273	5.63658888643678	5.76438913171535	5.35560320803232	5.75408442270667	5.86151556322946	5.59526919941796	5.92657905392944	5.02947080605189	4.94859875625737	4.9781843188943	5.10651423692281	4.98774012008265	4.99339656338716	5.08543306343382	5.20263376128993	5.19012421773665	4.96511296680108	4.91230346423932	4.96605886421733	5.44122977361546	5.30954558595091	0.605433281209941	0.46197888832526	0.562781340370148	0.729628505310247
ENSG00000039139	-2.28787590229676	-1.0589084578662	-2.11907728086123	-1.98873353524879	-2.05429078236965	-2.05261608028891	-2.31278390566947	-3.65790620289585	-3.34239362940124	-3.50703361607793	-3.09165802043986	-2.86878857996361	-1.46891674060253	-2.61158950933693	-0.0759719768744791	-0.558696793818089	-1.60528730076809	0.266138627310218	1.88152310689481	0.321234177579177	-0.341773879098529	-7.30042840697584	-9.03339779476209	-8.0885618899684	-1.16792431406715	-2.05603607871299	-5.56568498291375	-4.79276568551775	0.261958044804546	0.534612106321459	6.01653675569328e-07	0.147097029361593
ENSG00000039319	2.20490791240548	1.95058445207301	1.40410173691617	1.63946000720699	1.76465904686093	1.6667707398737	1.618582943263	2.72323303148264	2.76503225418448	2.61171059722824	2.53380277295225	3.33682548324316	2.38372384460727	2.82361690436762	3.73761144013655	3.79219620695823	3.86942452594176	3.29451344336664	4.01063641220332	3.68073866587722	3.57180663179805	2.39624256557916	2.26137110338405	2.02392999213341	3.74983777419124	3.56932225802683	1.6267828860745	1.87233725963387	1.22109342830857e-05	0.000291363132237758	1.22719135785363e-05	0.910056327915493
ENSG00000039523	1.32095165708594	0.449481776591201	0.229766991312876	1.34211947997144	0.28005479762291	1.49233736278395	0.984865676920825	2.05718106536887	2.52203001497759	3.61907089771314	1.36922095497775	1.88727874706578	1.86316642134164	1.13353743662203	5.37953065758563	5.37908364371389	5.8068702140985	5.72489997946365	6.07085363422521	5.77457123827684	5.34183072852656	4.8968493806545	4.5926780376048	4.57061143559634	5.01768415528385	5.02403287053566	2.88867559507449	3.43040312503794	0.1484050959064	0.551890877447929	0.0008143069930915	0.265039943580749
ENSG00000039560	5.3435774311364	5.03121616082965	5.1536455528977	5.55592471423885	5.50685009068671	5.16219170990925	5.36456533342993	5.20332386455454	5.5798951350422	5.55229767973495	5.53324898318481	5.21624082737624	6.01959423040775	5.26866245941886	5.90384685692382	6.04894257001094	6.02016018656283	5.49774238554584	5.91720208660102	5.41098571717169	5.13729609348247	-6.65788228505159	-4.43507789667447	-3.17434150338643	5.1519025469302	4.95680157955598	-3.76295128475619	-3.78599374014218	0.506929111307357	0.878910769603073	2.67027346794661e-12	0.0494959524080847
ENSG00000039650	5.80937811859751	6.02574800544765	6.35399327231207	6.46877845101618	6.25901958041877	6.6740103417401	6.17068211398286	5.52338307115929	5.777350763952	5.62524022334037	5.52423898716444	5.44282303615027	5.44529809674625	5.74590392651734	5.13309574211254	4.87633302979146	5.08387306068562	5.25499294577204	4.96476934410671	5.56484951510707	4.99049434188452	4.33633665382546	4.55715059148167	4.86885300873377	4.42302153952951	4.74941369661885	4.96612061316828	4.99337048541408	0.000220587135311083	0.00686222872764175	0.0109511300843299	0.110984655155443
ENSG00000039987	0.832616123419845	0.416490949355142	0.147233581464145	0.474861564727754	0.255457297500515	0.428391926239394	-0.0772121647110042	0.914074252724668	0.45371285986723	0.143433664385696	0.725174459421349	0.861122489733966	-0.404213451967032	0.335960611344196	-3.59018405713845	-3.51258968405998	-2.50523394829216	-1.84885174697894	-3.15581699260046	-4.51402027281875	-3.432835442247	-4.35117104187324	-2.12274637845726	2.46312882178061	-3.8810555632016	-2.21892548429608	-0.522257050760153	-3.30790918310613	0.828882208968484	0.75317595673275	0.356950469446238	0.944140330066791
ENSG00000040199	3.16352776533946	2.84346225473785	3.1363840117548	2.630710999019	3.06840019075186	3.12884048885433	3.13083708272963	2.50606702135065	2.28364400106569	2.36012663788702	2.73991482282811	2.91383628721194	2.5117840651036	2.31729069373439	2.7184074777776	2.52673508952889	2.51384346287715	2.3616368793272	3.00106699524958	3.05340865796819	2.48332867649086	2.62958272650807	2.3049317598439	2.22947275236905	2.51939728272804	2.33183261567563	2.20968828946377	2.2240987064656	0.00923446371044362	0.501776060426769	0.0429458075210895	0.390595132914726
ENSG00000040275	5.00828113288353	5.16470341484317	5.22840116946586	5.1556132419984	5.16835329557874	5.05478449811987	5.19405505345028	4.26472738529981	4.99412805170583	4.96913982838147	4.79940957407262	4.60107941991321	4.81764864380173	4.94805948576408	4.36784733651167	3.37963116084321	4.89636138280643	5.04842911657529	4.48248328020548	4.42242272202413	3.36828956106012	3.57233949713018	4.00544801814464	3.5141439700061	4.54770764757674	3.86541381710155	4.81634814725292	4.5887164387358	0.198319608331455	0.405745814937251	0.653935984766438	0.924663308561163
ENSG00000040341	3.23154839042025	3.43696952897796	3.11152151937998	2.99368759694686	3.38937342388119	3.29423291308693	3.06710743231425	3.25124334968403	3.25366978625545	3.39210888392224	3.15897037175087	3.37028332122229	2.96538133949606	3.24155189533857	2.5546382219932	2.35549671593878	3.03526353392588	1.84072025939372	2.77613638892948	2.38231948914435	2.3497798583859	2.42093916718202	2.70082241466453	2.19628908180434	2.3798568479817	2.19367755870718	3.11159757765602	3.16253191715895	0.925913057001065	0.911926554513599	0.888752534515681	0.730441453238162
ENSG00000040487	3.6741044556365	3.4964048847628	3.68474413955358	3.49907069307451	3.3944493425541	3.43793786762912	3.5542756678881	3.8120208047265	3.30624916603253	4.09940692178951	3.63605624712384	3.30600896606399	3.94415224398207	3.58343870468646	4.07390221950157	4.27437547613329	3.61006880691527	4.08440398142216	3.49557197596218	4.28166344074351	3.78897600556147	3.02529727220092	2.84818958618338	3.29747481794915	3.88660131095902	3.84156685249935	3.25378626650678	2.72559828358702	0.784739161195599	0.873887441729025	0.00642737480090813	0.779727274475745
ENSG00000040531	3.15435790131319	3.39485143951112	3.16907780518762	3.02312959009669	3.18680403971382	3.12676600350471	3.23903585966624	2.83848498781655	2.6748584469796	3.0409167652362	2.91889446464634	2.63789629239142	3.81388248211812	3.32445259738988	4.16590858073739	4.54972194452066	3.85656781989899	3.7803478846014	3.57914443040379	3.78507984542456	3.81023586527031	1.98742763428544	2.00434070454348	2.24147128512995	4.29836475861396	4.31210246595996	2.80278636152999	2.73479979702196	0.375469617469654	0.335547664363479	0.00233952255468752	0.280897294821695
ENSG00000040608	4.08014103241472	3.85658372708345	4.12769508891127	4.13920677917067	4.07743713883481	4.23588675340594	4.19925042402332	3.98688797495616	3.91110789038108	4.42535182312888	3.93361768942663	3.83073128820735	3.7789982177481	3.48307505998382	-1.67216647525202	-1.74195984198087	-2.37654427863218	-0.875838895988251	-3.04303848295508	-2.1719967067894	-1.83847248516527	-0.753743105603935	-0.47934508140079	-0.724882184252374	-2.83792456951951	-2.66865342893836	-3.16399715061831	-1.24763519241741	0.273798570545673	0.501684580252605	0.965708162603907	0.551053945919062
ENSG00000040633	5.7170111520502	5.56166881686721	5.65512490461932	5.63870759128108	5.57910465707639	5.59029727546945	5.54331884271284	4.93553500233607	4.95517817966045	5.15982931984837	5.20228101435589	4.70539556121061	5.40470649109985	5.2167439975012	5.24627541672312	5.63121880121008	5.15977772928762	5.05538738323876	5.04717307156584	5.08419626138583	4.96227811419051	5.26699489711425	5.15671864537114	4.35432433131381	5.35697385311485	5.63795553462888	5.46131721720202	5.12483752781197	0.00270539691924899	0.0251945977576732	0.527526004360057	0.309452603118536
ENSG00000040933	3.19830045970844	3.27723074184	3.03438482066568	2.8696640513387	3.08771522370423	2.67316927846163	2.69631362294945	2.92614102305099	2.89451889232037	2.64519171578516	3.3910162457586	3.44402572312772	3.2436337813293	3.23073180406623	3.17098911356075	3.26312858353811	3.00247990308816	2.66273826031892	3.04693526092276	3.13906942501996	2.72813559907318	3.03943488723325	3.68540210763055	4.03360569121543	3.06752668240597	2.92715959136862	4.31703355603256	4.10700045909034	0.346562411357302	0.238449952253954	0.0774060412621072	0.98157364955458
ENSG00000041357	7.60273489690004	7.75246059894108	7.8523696324304	8.0081092531499	7.8915794973104	7.88885590236837	7.87757445797153	8.34402306545651	8.55682415948552	8.47263746857897	7.99806080173961	8.13052884238375	7.85917798249386	8.10758069828777	7.35705122936991	7.18802945343594	7.55529050711643	7.3587296676763	7.29274541701463	7.18908711306582	7.22540091820917	7.88469179049756	7.98106519425659	7.87096336479138	7.34989830152931	7.4743417850606	8.20907299658345	8.38558710481144	0.0196322779073206	0.345845392055091	0.00198003931992744	0.723977148787149
ENSG00000041515	-4.41793492550753	-4.4621385851501	-4.36054825398558	-5.01765157231401	-5.87929031202193	-5.54879167816945	-5.42437335201769	-7.26312465320907	-3.0271153829273	-5.11984722842104	-4.34339183558837	-5.25909621698774	-1.37130263382446	-6.11946159990358	1.57071532074212	-2.97545736287911	1.97131062286641	0.566700021879914	3.06948130430559	-0.418842153713411	0.896941757633367	-2.98269126895239	-1.99966420974459	-4.97341177248349	-0.234394662174293	-0.936463476098648	-2.31705453082914	-1.39874690848445	0.901867912894441	0.965818546917786	0.0276592140026539	0.614849415223335
ENSG00000041802	4.09209736594758	3.65548465749463	3.7979741076319	3.74972200509823	3.78733542440079	3.71367096730964	4.00806044965555	4.02708369466191	3.86233875186869	4.0057616450506	4.22958217833371	4.26302517514931	4.66408489998806	4.65261360222202	2.84975363108934	2.81313405331194	2.29200994587486	3.29379166937534	2.73486757188826	3.03352418196175	3.0859393268711	3.53402196537315	3.56630197697882	3.89330887866525	3.34416206187682	3.61588965489335	4.39584442898764	4.29680627440262	0.0497048060506577	0.226135532296329	0.0014869898469977	0.16970980299805
ENSG00000041880	2.91193348789197	1.79771572629261	1.61069187966125	2.07250846678827	1.58550223047618	1.81662908700802	1.93648778747273	-0.998273984110924	-0.62653099294928	0.152726462901113	-0.5268902767526	-0.321206463058551	-0.17031978587026	0.149676434059982	5.97889142586256	5.95154127858518	6.15433600287669	5.95893537418152	5.80737956700348	5.70739839280917	5.486953351764	3.75092166922876	3.86647247908605	3.86179989288596	4.13348963203437	4.35033173433442	3.50650773882579	3.25943134639002	8.86207170300828e-06	0.00311288256529225	5.15500846747219e-12	1.27442332164524e-06
ENSG00000041982	-2.06760141706771	-3.44292435998271	-2.47504292818404	-2.92863096069145	-2.97733991758909	-2.99360546137324	-2.63599973131417	0.277259439112858	-0.395849658876786	1.07892502825219	0.580044717104115	-0.694330774947823	1.97069354775652	-0.227300451591338	6.66111988988402	6.5747768667342	7.39411310680041	5.37149852160123	8.1503736891842	6.89052965703724	6.8960765600701	-4.75053573905856	-2.79492193085247	-4.54814971809964	8.90534331199265	10.1020128838132	-2.12224378717042	-2.75696869137963	0.0264076998046206	0.159485464063226	5.65500791159807e-06	1.70820486877417e-05
ENSG00000041988	2.69188138042498	2.76677541087841	2.32769209410895	2.58162939188933	3.00356077668815	2.86692961983356	2.41012418614321	2.6094183487178	2.92377423230814	2.64401300939159	2.37584294943995	2.69427235538241	2.69633895819631	2.7448175471661	3.36646115073083	3.32221729245851	2.17040558305661	3.52232363385227	3.66737510034765	3.21083553649275	3.64838383816456	3.80633281110984	3.73852193056993	4.62166786808556	2.6549051966045	3.15622962397636	3.26870144379189	2.88817819020134	0.955182990609925	0.901386194480083	0.885252636735493	0.638793572098104
ENSG00000042062	-2.43223174051226	-1.99994950238168	-2.23611908237203	-1.70163987859205	-3.1423600862873	-3.07752600924358	-2.17957910793009	0.272141517801497	0.724004891125057	0.309642607148252	-0.193634468938161	-0.679909057038212	-0.97332245502638	-0.0431911401805474	2.7395470542858	3.7796998573713	2.22643954324441	0.513071907100026	-0.872736383203598	-1.29267601454238	1.28819581237268	-5.04960057023068	-3.31352027419372	-5.7820642455257	3.49967402803202	4.50300081024282	-3.33595577403274	-2.57594734051984	0.103327699173547	0.368846672045515	0.252629918827193	0.000350734286543017
ENSG00000042088	4.39857034501866	4.38285418106411	4.61827222986852	4.67434157002053	4.8118289382844	4.44927809309795	4.60400080697775	4.34264492778951	4.43179249069347	4.3742452586779	4.39574537667542	4.3910349084097	4.05291351149583	4.26765101759892	2.17805532091276	1.99004580964792	3.24178780016094	2.66495784031403	3.11111988640214	2.43966751245113	2.1712067968724	4.15762513046203	4.22223757533941	4.55791502274707	2.05063916907497	1.92933681877968	4.45536412266997	4.32828364513295	0.18193287518477	0.581562838906413	0.00375592850092347	0.209147899229011
ENSG00000042286	2.35675651611519	1.95377914253595	2.40149242856558	2.46110513028513	1.5406156218836	2.63026758340153	2.53947919040667	1.40377000927564	1.76749119627946	1.84040744335971	1.42134194355392	1.54612721537653	2.80228505778892	2.14575064303397	3.86050487412588	4.37244592653588	3.19794452236363	4.29537723127232	4.13423061461066	4.6846768961744	4.59234743908614	4.7011574053096	4.17123484035606	4.81013020189071	3.73314324528754	3.93947798993532	4.53963541498511	4.93376665619259	0.255047864076169	0.352769056692119	0.956256603631271	0.467366325180692
ENSG00000042317	0.00214627427338465	0.737506802463202	0.898433225215985	0.979976293610667	0.85357653766453	1.14298964514195	0.898864126270222	0.835983953686438	1.24704556795554	1.28265302347272	0.967628919668759	0.998594045574136	0.401523145062962	0.903290417440603	1.63153847153631	1.51509510712796	1.00142176919887	0.790981018781875	1.08043783416444	1.0731764147786	1.64154594784878	-0.841602476913994	0.227262383399319	-0.547745908990528	1.847361704318	1.39120042739982	-1.11047649602709	-1.75226565750187	0.641774214006354	0.749293598774201	0.0059834358773281	0.385827040110714
ENSG00000042429	3.0047645738494	3.17078770480065	2.9516388152526	2.85677375848335	2.95912197158628	2.7151575137093	3.01938704160582	2.53427551318972	2.79721983091751	2.94502413177636	2.93676784842521	3.00433348973335	3.24921109982563	3.02960907329088	3.20607184758573	3.08579337705284	3.32239290113184	3.33182628903975	3.61578124448838	3.30511087999394	3.1090930111477	3.54385149400588	3.44100931651186	3.33796255118628	3.32979797282947	3.33547421542228	3.63345999893824	3.62372787259063	0.95238777645805	0.953959647153873	0.274288869780432	0.868800593173756
ENSG00000042445	2.49459195822546	2.58308913681588	1.69796201857512	1.8718790867863	1.88803450252337	2.31481093637591	0.916609193418717	2.95062436772946	2.90817725029726	3.0041765878077	2.7355890597731	2.6419137977822	2.932571446086	3.30535187040447	4.64273574499216	4.73296764474311	5.10177529463629	4.44361823253667	4.90134182397321	4.63895755943429	4.45757906899239	3.34868092010751	3.54718590560753	4.07640541430716	4.50615756380578	4.59540121003782	3.62592633213584	3.25467049830534	0.0044636994099331	0.126729435478797	0.000671813227990796	0.699055392997851
ENSG00000042493	5.48558402927463	6.0471582216253	5.92813347314812	5.87407649107886	5.6917707207061	5.98843376310549	5.93067923157399	5.17066164879674	5.47106283789462	5.81465484469345	4.73738640792525	4.4697069065182	4.30475967154968	4.44143395471222	7.66579363016791	7.71720567357087	7.29981432391767	7.2806736675567	6.24180494161921	7.5961422807298	8.33504697512866	5.32768207263499	5.84321809785452	6.03654973250024	6.41870141054568	6.45591394444515	5.13465831182903	4.65948729160614	0.00715420340462154	0.0431140645058154	2.32821357822566e-05	0.0640551177191232
ENSG00000042753	7.02509436826064	7.36528412053887	7.20022016757327	7.32385872991742	7.27261722572063	7.4329491786851	7.27005601477841	7.57676302948834	7.53604674568044	7.51007167836286	7.26680624326841	7.09701331354361	7.03867078155287	7.24776835325412	7.57285975389215	7.83896036270598	7.43263238883437	7.84588291637242	7.31249567066223	7.66121089422554	7.81067867292998	6.38042760864283	6.66422199463221	6.12299006237884	7.71445354968808	7.98966405778145	6.70563982699185	6.86473324684453	0.965057568885463	0.78750185362752	0.00255203672507358	0.447220322769391
ENSG00000043093	2.68139370668063	2.8257570335465	2.73446650210538	2.27448842273315	2.59568677284123	2.65365220779601	2.61427187703277	3.0796732809204	2.73636807043436	2.8531064873039	2.89492203567299	2.67422295280956	2.95419516954348	2.8607577170097	2.7394095921949	2.47322249855672	2.69814183728479	2.82632539620165	2.97427814219197	2.76276515142037	2.94590203030533	2.71831856411169	2.54450397218083	2.93654233690693	2.86214718229365	2.71035521244955	2.82004714531935	2.99125345694051	0.112897321483823	0.537294853269662	0.890970275928081	0.951484534696291
ENSG00000043143	2.95408632685796	2.84167109790834	2.39846707647075	2.27745476715	2.34977937722709	2.40656980539608	2.3170213398952	2.0790028305837	2.05755492150523	2.81134811455025	2.38476121700976	2.21675875584822	4.01458077247825	2.64749122834753	2.21313526869363	1.92400895652014	2.85597645778753	3.28497197992705	1.30605644794208	1.42578386975904	2.35694372282711	4.00540148970277	3.62113595768384	3.53706530990294	2.6016217362361	2.62522979928134	3.59589475214329	3.61805987700258	0.99358688507617	0.794905128607537	0.00618601418217336	0.520499157069436
ENSG00000043355	6.18352051460327	6.20060705100628	6.06096973188758	6.20535880645494	6.42497731400471	6.04406064757756	5.93624213043609	6.19019270110425	5.73314430702567	5.71350273914933	6.24519581947602	6.57197057129272	5.85803555962507	5.71682440954221	-4.69810629485092	-6.31994797726861	-5.46241083384488	-4.54659882283987	-5.82040585234767	-7.36725376816775	-6.0445015847376	-7.6937315679398	-5.52412104265725	-7.23550806204408	-6.56562492401737	-4.80736927878511	-7.11811468496812	-6.35163106289449	0.903752680203458	0.241150188791533	0.491829569181797	0.967144427090414
ENSG00000043462	-6.98285443754281	-2.83894334163544	-4.46007279280703	-4.27322548012015	-5.60340728617533	-4.87207795827566	-3.75799499692478	-3.07052271984726	-3.42111971436335	-2.93996767908011	-3.27151179094872	-3.51814766531902	-3.56781462924396	-3.722370701381	-5.20603015860279	-5.14073830399024	-4.15422507087817	-5.0469618024267	0.362522697827557	-6.15332391506213	-3.45283471337843	5.52424099975605	5.74344917843043	7.23298932564069	-3.91566607278664	-5.41126071983361	5.92246779554009	5.62659481393271	0.414953956978713	0.663451615292772	0.00056084161705492	0.879382721064662
ENSG00000043514	4.08517410637219	4.26806389910062	4.55688943037213	4.83493212404807	4.59781160727352	4.77178665920391	4.58716255736811	4.62674125299311	4.94389050319826	4.57499232668826	4.22031000728171	4.19945438492705	4.1359810171042	4.18047810733134	3.65762059086388	3.40128045259483	4.06289728127344	3.59548838477967	3.88710639591785	3.64172259780928	3.90301741020678	3.78610017153369	4.59964012331516	4.66898098022014	3.17570580319767	3.33516795254148	4.18132438576793	3.63022566265294	0.457537067817577	0.421936069067259	0.99173037307825	0.335583084231014
ENSG00000044090	3.03069800514621	3.46939619763746	3.0405967812313	3.27132142199185	3.18828775683793	3.60574543511251	3.15515257088113	3.22784793154654	3.43983215563964	3.53704008929797	3.61704206858378	3.75071882167618	2.99649925000016	3.45425031097912	4.11837534275759	4.49799341188601	3.97280924381122	3.77772464665755	3.62529090677914	3.97459029448896	3.58618384302367	4.36442428074422	4.42822828661079	4.83503636497757	4.66377852469432	4.89694182179612	3.05385041835369	3.17489704327067	0.464917016210262	0.428771924111083	0.0892006808390689	0.0644984311696972
ENSG00000044115	6.42533617650028	6.50683194096739	6.52758343248709	6.52771093505247	6.5018084302566	6.63173782996549	6.66070975717273	6.71413915173334	6.70224577973948	6.88644540582695	6.70537737775724	6.76241641496098	6.54090638474131	6.67640684447378	6.41701700407001	6.4475233344317	6.61228376146431	6.64413810511666	6.94734888033874	6.56048156399386	6.84132653962265	5.61785850191444	5.50248698443064	5.36387144538552	6.88938311300527	6.79668763773003	5.37663424104984	5.24651374058721	0.101421250690746	0.287230504895798	1.42408281182557e-05	0.252836206000548
ENSG00000044446	3.21643469833252	3.41747693964702	3.31828044343413	3.34530154827302	3.24109335144665	3.4398791623641	3.38948580709558	3.23778048047295	3.04621950297382	3.53877198050463	3.2654937351713	3.30894846190274	3.1494673049899	3.20233255981431	2.55971777787163	2.6418517354742	3.21659986424703	2.34687723659555	2.76731600463609	2.65276822611658	2.77842697345102	3.05010139055152	3.12632480432458	3.59393567453927	2.29768049349232	2.35640464003053	2.98459797576563	2.8579119141321	0.641014097457411	0.879701443439031	0.864137584317027	0.230565493601928
ENSG00000044459	2.40212390136132	1.94457740620615	2.01974440168656	1.87079087078826	1.79304037139913	1.74756925872812	1.85663143358711	2.01067234490469	2.11458398909831	1.76847798512264	1.81335963694651	1.84980252545372	2.08863378578247	1.87499077775352	2.04590800749187	2.03477617904563	1.7169358605811	2.22911879624894	2.19718593121635	2.08664964121506	1.92474983815607	-3.49803226701308	-1.01786048899987	0.714142098983605	1.97150888823314	1.35534974529524	0.39969968135944	0.998188496636615	0.936310636569481	0.896640573308779	0.000399217460219467	0.661120012522639
ENSG00000044574	8.06358150884122	7.43372095152273	7.78869906956657	7.81782502581083	7.67266320888256	7.57581467868999	7.84976882454298	7.76178404607831	8.10104402127797	8.10719994248579	7.2301229515877	6.797740435052	8.29814456562486	7.99506165357187	8.35482252204452	8.33165204502962	8.6462417801527	8.30966717552061	8.35834395318996	8.42278957907008	8.98761261367267	7.99644064628966	8.43883871891389	7.69422113776379	8.36080783758381	8.35841237091472	8.40153847076737	8.48738088803227	0.271309264337945	0.0136075236850283	0.205000271056231	0.729628505310247
ENSG00000046604	6.74115484533245	6.58859376949093	6.45325114218419	6.34076391079186	6.64562836844686	6.17682127310447	6.54161559844631	6.14685178951235	6.08871789198419	5.97936723293315	6.73705483643721	6.26324971763728	6.77559963355148	6.32975202188141	-0.712205199504912	-5.89569464805229	1.28738250211869	-3.9936023394152	-2.81398385540931	-4.24020942542686	-3.10264393746678	2.94413293354237	3.4846331516032	3.78535082569063	-2.79439994655465	-2.25840988297078	2.90745036724029	1.15210241996233	0.756126118498986	0.999719156282634	0.0204187783535609	0.917420352290525
ENSG00000046647	3.56299251823194	3.65052237168266	3.93477039156974	3.75741836841819	3.70354590594526	4.01380458117847	3.92969012734667	3.82530022148402	3.7871975057585	4.69531291224721	3.42063227821818	3.62553934657953	2.79601938947419	3.46019108926149	4.16145765624076	3.68045643254862	4.10968862335308	2.83724508977428	3.11579759890627	3.99357750852567	4.874028042831	4.12852094550973	4.27243806897833	4.09224376651797	3.84056425777261	4.51295849036777	3.23607682343797	3.57865782418596	0.659993541924828	0.729182411399111	0.543520496096872	0.621270337731413
ENSG00000046651	1.7835652929944	1.882236515141	2.18093095124598	2.09274845243204	2.10372966795601	2.4047864980214	2.18864521718341	2.28556311673786	2.45498017461231	3.52311921605018	1.77019767807224	1.81345886794445	2.53995423943425	2.41442306525494	1.61277540330185	1.6221303787413	1.64248602131067	1.319117099252	1.08016639705554	1.31331296049083	2.49138451670466	4.35140433495989	3.73006832008308	3.71760600187846	1.60622771869669	1.90524508487775	2.61985010848529	3.22084538335229	0.817387792928724	0.723156657507862	0.00882116059543921	0.847635406751438
ENSG00000046653	5.10748543916952	4.91420378842849	5.10595400409245	4.74489695171612	5.03334101602802	5.10431208677203	5.16288226800675	5.57688763309701	4.78932849353698	5.88279673935617	4.90334422760105	4.77040873136563	4.83482429505104	4.98297733253579	-1.20332518338543	-0.641243461167407	-0.815846244174039	-1.45206515438758	-1.39072650486198	-1.39628244014739	1.73432439511664	-0.809565466653779	-1.34769715191088	-3.41667393813241	-0.931389239771819	-0.540054272452232	-1.5281090010231	-0.787462788054129	0.997979882266407	0.677630498858317	0.620662958257334	0.965005702700791
ENSG00000046889	2.46764399726896	2.19286034468529	2.10300129011682	2.09289527658435	1.57776618620883	1.04700801419356	2.05824679863231	2.75505266756211	1.73679354967472	1.70206023212261	3.08625886889314	2.82938623548657	2.65095600142322	3.12337488888964	-4.91320777274985	-4.16954879237144	-5.52632560203351	-6.33032047560593	-6.01163433122267	-5.26621750638584	-6.27026299971569	-6.18852766320616	-7.92347342269975	-6.99112164077325	1.92709086712832	-0.427788976614178	-5.67126114954081	-6.48098510757175	0.0176423435816679	0.0289225241888009	0.00774036486152365	3.88207998857945e-06
ENSG00000047056	2.36102435023058	2.60381584522246	2.63998528011967	2.64070640483267	2.69701170626565	2.63399206295142	2.68363727059932	2.40688170312065	2.56945500387469	2.30794378972487	2.51770065696414	2.53417442474544	2.44822394532715	2.36696600025733	2.43294652996987	2.65431031911413	2.97232215269247	2.85286634291985	2.9836828146849	2.56273737540044	2.28414634717422	2.9875070437863	2.93597238800908	3.48401548106796	3.05664032301926	3.09860168656064	2.78478652806901	2.74752544786582	0.453662715391468	0.822025457317274	0.0141032100607431	0.119176775642255
ENSG00000047188	3.7345334095711	3.2359522675044	3.16706934245383	2.90066959355039	2.87364774799942	3.25847251964558	3.0769867042131	2.93790876194425	3.1434508319298	3.27777081779231	3.12205426512736	3.71522829098718	2.95045656740734	2.73967876344361	3.53859668795331	3.27134576751534	3.55901153932658	3.24960608480211	3.36429821258474	3.47456843806587	3.03547466195406	3.11566689046214	3.0238715060437	2.91422678063008	2.94097014496249	2.90476605597129	3.11084495992007	3.14674349228176	0.859324951517161	0.387003296185381	0.0185298911784275	0.118568068618409
ENSG00000047230	4.42186159684084	4.19767432258912	4.1992431802145	4.27179926902728	4.36788213906393	4.56025432570828	4.29275121542154	4.42008401952265	3.87159725653996	4.86953542807336	4.1258128668554	5.12687462566286	4.26210226138321	4.94609430944211	2.28886975133815	2.20930894315624	2.37112550591985	2.22404669275371	2.71032571892873	2.52631916477883	2.52169512941893	3.24929700346626	3.17750975502239	3.38064558989854	2.49202525054258	2.72344116319887	2.90158604721386	2.93236865200278	0.282964247476684	0.367379844340655	0.0726241775432057	0.747709450885873
ENSG00000047249	4.06305618197829	4.1919085599096	4.44082568346651	4.25109012596928	4.30723016389183	4.09280804498249	4.25254424015025	4.22675243477247	3.93888393252137	4.08966279733628	3.9079635907294	3.7448828576084	3.61628472064706	3.68399892651395	4.78437572906899	4.55347093612923	5.20251634335573	4.58380494434832	5.10387058338193	4.6386942900425	4.74252737680508	4.45785733948506	4.27843620519242	3.85935843651178	4.75726545262805	4.69647651831994	4.28771107736457	4.15241199391102	0.033294695439061	0.144603645715317	0.0260803920022154	0.853954270120234
ENSG00000047315	5.80717859715577	5.74158681020806	5.75967978787051	5.6608093456653	5.73254527544569	5.57610740966319	5.71631208293067	5.68420328433671	5.68121368800381	5.37324473559649	5.85387768047103	5.7115384881924	5.98324868508689	6.07343192903186	5.56570577219595	5.63826291446544	5.33048131156825	5.44731751705038	5.34499048265853	5.54337139914885	5.5041542013028	6.12551204926575	5.77146400072131	5.70284830538701	5.66497724853126	5.60218880870251	6.19814333041987	6.03066714240219	0.706216878947917	0.809275028198699	0.0106517954660167	0.542587468271138
ENSG00000047346	0.976113769702631	1.73813043241104	1.03868216662825	1.21352133597712	1.03863923275839	1.01666251044786	1.15294366537095	1.79068794608892	1.98322408782643	2.21860430647668	1.68607528438725	1.48957571743718	1.16581102279049	1.38923578215493	3.90423239905555	3.64380525479847	3.62626194686325	2.96964054186926	4.01074540849559	3.1988768688222	3.58920793320969	3.99464391843302	3.71189723939724	2.79994139911261	3.75248488924813	3.47027615885773	3.92218926573455	4.34898035092103	0.273190976472099	0.593722040767604	0.601870862799029	0.901267598299937
ENSG00000047365	-0.417866990254279	-1.10134582075499	-1.34269103968133	-1.65584006982427	-1.20830089656653	-1.72615254005781	-1.46355635009762	-2.94993251557162	-2.38729793966212	-1.72040775813749	-1.50272614471524	-0.982062587090067	-0.846162954338556	-1.72430411882624	-3.9019015714449	-6.22435208917064	-5.25973914537518	-4.47188060612519	1.56110986416964	1.28937869310682	0.579743903619953	4.3897268607791	4.18550073851837	4.92373958715184	-4.21384044498714	-4.0530293643539	3.88114380830901	4.05500786344718	0.835005762406094	0.983651569871467	0.0703399986985339	0.49630884747646
ENSG00000047410	5.40885154934389	5.42957864396668	5.3134819656171	5.2537797472306	5.42783633136646	5.23337139776299	5.38615203215551	5.19119723516492	5.24208932619214	5.26864201920176	5.41555685338243	5.47585324244717	5.39965807520692	5.46412870638177	4.94463990160519	5.07420755475758	4.83029318295084	5.10979771155809	5.18483728782213	5.10887471411427	5.16950911347858	5.66879817367797	5.42038010347884	5.37314129897629	5.3246648293212	5.18692936820639	5.53447967298062	5.58389399988093	0.797414505653897	0.586160446313635	0.000467295249633166	0.211390725243192
ENSG00000047457	-0.643185780720712	-0.748048583694293	-0.377226385672314	-0.83578441873773	-0.61168855718433	-1.30077545491997	-1.41665759848922	-2.40787210614357	-3.41490039695986	-3.07113886894227	-1.86192047137827	-3.04903565353992	-1.40059496846953	-2.05453975401628	-3.37957428391698	-3.30810968187824	-3.89619540068152	-4.80673581039883	-4.52771090034055	-3.57785522518787	-0.409386563451397	-2.96448032838831	-1.62027943459759	-4.61124198672754	-2.93783143327964	0.108906990549026	-2.58232808331411	-1.90170956680997	0.0235447237390245	0.185584322967534	0.0756859923394729	0.104454936479555
ENSG00000047578	1.74605708889952	1.99032789046869	1.53212654937639	1.66572072791638	1.73639603526649	1.62972540674912	1.86851003566124	1.737583191863	1.81558127728578	1.91073311822819	1.77046436646176	2.01943447499187	2.23757111376271	2.34932761556218	2.14277475865883	2.33175234326771	1.87999919949106	2.16564917168219	2.21209449170507	2.32578526772257	2.30887399347339	0.88039188464529	0.795177566203552	1.5067540136797	2.56602312787204	2.64745500191903	1.70200849391051	1.63748433905493	0.283250592996685	0.669931714370227	0.106973542012553	0.177791832312602
ENSG00000047579	2.155481735521	2.53033822875003	3.00788355778423	2.8024795870301	2.78147982540694	3.18827443559928	2.30639649847348	2.22906272936168	2.70671798859088	2.7305521764622	2.17527680382882	2.36102112089879	1.99856854246425	2.23976797608297	2.03156704669831	2.2666281094228	1.03343362268232	1.80106856251104	1.62687783575275	1.84179705359913	2.42037204422205	3.5814762240293	3.39023457959023	3.35240505008943	2.61635976253994	2.9407087863321	3.41310247535805	3.0818280306718	0.13367404323598	0.336256539016504	2.09814044517917e-05	0.0288243812557392
ENSG00000047597	0.0571137854389141	-0.331933444326862	-0.0901881428961473	-0.726567447046318	-0.159923879188013	-0.862934087741953	-0.57058118331859	-1.00343964094021	-2.55428065297428	-0.672513821726937	-1.48754872808721	-1.11374398059528	-0.839364135916327	-0.822967434406903	-5.19522292201163	-5.12678961595027	-4.13503699609597	-5.03678498632021	-3.17223845429457	-6.13632582442036	-1.57029904821421	-3.69920409288855	-3.3116238891695	-4.87940811143098	-5.4884624877605	-5.40220023374867	-0.141048017060281	-2.62687912886773	0.184069164871364	0.436715106172952	0.890479822604104	0.55850616175903
ENSG00000047617	-0.312744732042668	-0.521591661186909	-0.212921784637976	-0.579001693894384	-0.226563645362055	-1.53269062899184	-1.27089229659564	-0.91181363531857	-2.29337901032065	-1.61812988589864	-1.34056348282418	-1.50783574881919	-0.814622077811891	-1.22914070621422	-4.46785137139036	-4.38206306875765	-3.36088730594371	-2.72873335051602	-0.867111012045738	-3.79204725605953	-4.3181261282248	-3.58593569362472	-5.26064786845947	-3.91765880300418	-1.58791443129982	-1.88161024026672	-4.81922304745899	-4.15441570203222	0.160287926406419	0.408031420388945	0.536206799457996	0.0829693892879817
ENSG00000047621	2.18859902174756	2.23986530085421	2.20942487813679	2.11624160804496	2.39429900589818	2.18574002063691	2.09221661809528	1.83524490931165	1.80252830771702	1.90667498750811	1.87878859737594	1.99994926147649	2.22824769946505	2.09964740839974	3.72651838699529	3.75246749643083	3.92073641574176	3.75667409324657	3.70019304988866	3.84290086921456	3.64052374040537	3.1728330999668	3.16660885615981	2.7823975337814	3.41907418907771	3.43995675163189	3.70643377503441	3.69282603575196	0.246164020607854	0.489854953242382	0.00472893599085373	0.200322114254129
ENSG00000047634	-0.750879125523885	-0.819129090817063	-1.45905794864078	-1.57044935898549	-0.896116438985891	-0.737518739496531	-1.19855063080601	-1.44226405046191	-1.28307390565838	-0.663975053913173	-1.4610454347351	-1.73947430900916	-1.80915599746249	-1.19621215496208	1.97728692180461	1.73524054184609	2.03565892033485	1.90074454626034	2.28563239904999	2.12129330902567	2.31398420883592	1.25324262512913	0.840412580805454	0.537080179086326	2.42660654123668	2.41320039346947	-0.474647565617135	-0.61513684601553	0.479455087867517	0.581527373850825	0.00669837384332074	0.336541221482657
ENSG00000047644	3.91533561392971	2.69583600849028	2.71877910057104	2.94595214668647	3.29206847274409	2.99354372286393	3.14070964673741	2.85679396247613	3.22247065348494	3.32915743226566	3.62353398196384	3.67287656811512	3.82123718536848	3.27593809092692	2.43769631202554	2.62395103796691	2.43257521718689	3.20314934664632	3.6140186898791	3.22051516899584	3.1117702704658	0.92642077933587	0.0384589643246092	2.46602555061862	2.94465650496085	2.64859795647403	2.99513118381144	2.58829345307781	0.356133000398625	0.403876442967996	0.0814679378186509	0.87378596393575
ENSG00000047648	-1.84415957052723	-2.09502108937529	-2.06259008025831	-1.6053177320197	-2.21053252554861	-1.69369858551102	-2.6627746231373	-2.18351623317282	-2.63829219990191	-1.61115585230994	-2.06717152685778	-3.03274992808177	-3.60050395410661	-2.7385394442325	1.41939812935735	1.13750111724198	1.74375106768177	1.41688315447734	-0.153244173825585	0.779732813255763	1.46478820058081	2.20069017428013	0.223633796049643	1.45370754907438	-0.00408971181221629	-0.187532547910215	0.348008755213466	0.468255014817693	0.594166977958151	0.779517363905577	0.14859165475817	0.205997913346357
ENSG00000047849	4.67314235664845	4.46757294575249	4.51076753858545	4.40456500275096	4.49088799333685	4.2369893015398	4.3948134969215	4.55244755743481	4.65151046699332	4.23602730952709	5.15096957826935	5.09637881743293	5.44782173314039	5.00327775205708	5.88255320694646	5.90767306645353	5.87134669922128	5.97484601484281	6.19748912813544	6.00484849012299	5.7353486836646	4.69128006893505	4.58889541148849	4.91725259494546	6.0739480159658	5.97456397348016	4.51570734209267	4.60530640551446	0.00467325172272575	0.0129734956853545	0.000277922488234288	0.808738295846188
ENSG00000047932	3.98958282989216	3.74790959044699	3.84072110669556	3.57048706583822	3.91656654466678	3.80477597201316	3.94205141887124	3.58308891807408	3.5630814727167	3.75433699174183	3.47794591948397	3.67150132317662	2.29965313440956	3.74846199401287	5.36007958304565	5.50884002410613	5.52429630180349	5.25747778368008	6.61718000195335	5.85788687031347	5.12407451329829	4.64775243681585	4.37526177009868	4.12718005825074	5.00858087169037	4.86929213080253	4.24744762781532	4.1542150218787	0.24821874848071	0.674041181699657	0.000189975562515938	0.116553971286126
ENSG00000047936	-6.80343487454052	-5.84971393649756	-7.27777663299158	-7.05807275595294	-7.3286291951782	-8.53280250423019	-7.70460138187922	-9.39624425179776	-8.98706407130785	-9.13544489706157	-8.65588842926635	-9.19080365347727	-8.20438436585908	-7.66429378043365	0.351276263189862	2.29252758490497	-3.0864768497194	2.48926258500052	4.50304437562884	3.23793030508373	-4.21764160719406	-2.92835977856387	-1.39496934083254	-2.84710587321881	-2.99085024139344	-1.77225835645713	0.796579975863833	-1.42638344942424	0.686625401280604	0.817260067957836	0.0791700664704244	0.397755928296372
ENSG00000048028	5.19935779742486	5.04399361836874	5.00750498211953	5.11322127367158	4.86372362909724	5.12037740726729	5.06088785210074	5.06744440669427	5.31088436607693	5.42768029782958	5.16471199190888	5.23670437452778	4.9267251087869	5.14701634017291	3.1500670185665	3.54689539860741	2.7397795808711	2.91956486836382	3.16961646837212	3.24616838698372	3.2624538557676	3.83726043589898	3.98334584579815	4.08427157497499	3.56071895192358	3.51903299485976	3.99860092158087	4.0109744495677	0.301426841013856	0.513382283510109	5.21696091606763e-05	0.0993039908571701
ENSG00000048052	0.735269721439731	0.70146760706964	1.19548500407366	0.277567635865549	1.28227303909713	0.874995863038512	1.19062216113825	0.65002167929303	0.124180958142358	0.684326081852211	1.30760072091348	0.943429242631733	1.41212672167984	0.0826325023566477	2.68891241563881	2.41289303943384	1.70513085336456	1.97632118653107	3.07229740261003	1.89092728955476	0.835064656175526	0.995630382575253	1.38597017791189	2.16906148112586	0.75309343939732	-0.0681856839573034	1.45482139390182	2.1066563227834	0.964292392183167	0.803765117405225	0.00703445678338638	0.033300981077844
ENSG00000048140	4.35296815663471	4.42508309415943	4.32042516482342	4.2763237648397	4.50182582987226	4.23534433626321	4.33742170246266	3.93041336870803	4.00254556770832	3.83810773198892	4.5092228172386	4.22824670816912	4.26700842393502	4.17740649957838	4.0760362998398	4.02468944038303	4.21634965060915	4.12309448932561	4.28761639673025	4.19465862424059	3.67403451792348	2.316048751847	2.41503309693717	1.25037002202979	4.08550157066402	4.19495637667904	2.65994356644605	2.81031692226289	0.479004109677772	0.971796984744356	2.53191519103983e-05	0.90840078337989
ENSG00000048162	4.84483546803987	4.3479004064171	4.93792083708049	4.90727632628405	4.76014742205251	4.83714789298754	4.81480360872	4.4017485008711	4.83566479930233	4.34346566653037	4.01929691476869	3.93466631207832	4.54926546938494	4.6508137878476	3.3231438604558	3.13489796405427	4.0532962386977	3.75927496059642	2.95801260743581	3.6044511267498	3.53241697227859	3.76045338754991	4.22070460716289	3.62882445137193	2.44702104005032	2.84469265800807	4.50610991562179	4.69874583490718	0.0163863019852516	0.0211968189085567	0.709164948559959	0.0872532253828587
ENSG00000048342	1.9327146457455	1.91339558726478	1.48033724883037	1.20769260316392	1.61771827792431	1.46105628298657	1.50731291505235	1.51946193446279	1.22442435480277	1.44327343322328	1.68776298842803	1.46107363599087	2.17784048099374	1.63116879908116	2.05772266246658	2.42471311481427	0.928291342020696	1.53514447417456	2.26202387089911	1.9015228151178	2.25086655933593	-4.57009172481146	-5.15412165353787	-8.76139443178779	2.39111391341017	1.76153756199712	-3.14235436990998	-5.45957292451115	0.999139343733457	0.975647772226084	1.97919530906293e-08	0.78683571968602
ENSG00000048392	3.42454476954102	3.01405819399797	3.24826474672996	3.47653917124875	3.45716104055584	3.73413781907393	3.57790669115864	5.30826571526285	5.68233475154089	5.28438027953389	5.13181591535936	5.24644130537925	4.54759771133455	4.85162889499793	5.47112693482552	5.04843606229174	4.98160991416414	4.4122227391167	5.85392816522701	5.2066213272681	3.93251309543316	4.85466154173334	4.49433065318977	4.92082275990347	4.26719729169863	3.95708281954467	3.90172879793348	3.94365795804194	9.34724821783698e-06	0.000876954113368293	0.0183131450889136	0.107450085849685
ENSG00000048405	-0.85157081425292	-0.66093374603216	-1.30611772114605	-1.48037314966319	-1.71353550357059	-1.40833373639629	-1.15919969722186	0.29679879191622	-0.0441000692748319	0.303863009862225	0.189480345011006	0.353624939301783	0.131763028695776	0.132232332045993	2.65939430546192	2.48167554682275	3.20735618367966	2.67769365221568	2.87014775950368	2.57312712178347	2.64597546833334	3.52391549298085	3.39126286094107	3.06687307113121	2.32887493415919	2.07858243091667	2.98055117940953	2.83973110289522	0.000219306495876798	0.00394642864403205	0.897627934001571	0.0802114547547925
ENSG00000048462	-4.27388633581082	-4.77279241463346	-4.64990023148425	-4.4458526949608	-4.63049027144707	-5.65182803565276	-4.95181632224019	-6.295026086048	-5.93460449266827	-6.03241555937129	-5.6389256356204	-6.13354771985755	-5.36988714467877	-4.90856462733158	1.03248861095101	-0.447166116351608	0.602459372271226	-0.405397488353894	5.10197709219274	0.447148632290086	-2.00824067445911	9.94743777992027	10.3197489791069	11.1565079149782	-0.105081980092534	-0.794406747064246	11.0012399622997	10.2214037482566	0.524407185976266	0.70957412133005	8.54236117881159e-05	0.682288979187465
ENSG00000048471	0.906238679523833	0.393023772538477	-0.432857210578616	0.330757411510405	-0.137003361262802	-0.159117636541278	-0.143456934298204	-1.21664375110326	-0.968031961657177	-0.699125688921704	0.188720814441854	0.290565289753441	0.952145302056668	1.23573747781008	2.86507550379669	3.04856253367471	3.65269803800997	2.82004077993416	3.08329947204728	2.95574061073036	2.6312975929129	4.25180618709531	3.71943772225272	4.51225730671797	3.47605257497597	3.27485102734134	4.00800918394534	3.97888602615502	0.937571467339889	0.914670465953316	0.00536460572667787	0.462732551917631
ENSG00000048540	1.16111802463731	1.01198404288774	0.305859583363862	1.24602798017948	1.64509025905628	0.902120067629594	0.0241838230997447	0.150163520956596	0.916461783706683	-2.73865742147865	1.54505860985553	1.35860265826934	-0.647631304994091	0.902693675125341	-4.40971811894513	-7.90466503042829	-5.45502940431483	-6.13191165788828	-1.13746216514619	-7.36970857876099	-3.92973209126958	-0.179383835622293	-3.0933258922046	-1.57290478499823	-4.24833943116817	-4.81203957197554	-1.64980506686269	-1.56218655027132	0.600648913388119	0.499706325733536	0.140148589417953	0.851933691142281
ENSG00000048545	0.281884068907391	0.25257054559693	1.21611135687744	0.598245142537671	-0.25616040027229	0.365182191640232	0.177265521145026	1.81552382717682	1.70268548314074	1.41532880219285	1.93748591424596	1.71168529233691	1.53969335316909	2.50015635882518	-3.31721633579242	-3.23826662694936	-2.22859144896312	-0.353827422828441	-2.88340453657472	-4.23857763965627	-3.16109674290192	-4.07949327380192	-4.17237284099407	-2.87117396007238	-0.811350844115638	-1.95793051911095	-3.71286533595643	-3.04057995467841	0.000619180685985857	0.0110805238171341	0.631478389756655	0.183177983470005
ENSG00000048649	4.23896092200287	4.17215215225678	4.05046346889653	3.81053582997722	4.13211727518946	3.92839815722817	3.98487292341553	3.88643111580651	3.85781870493982	3.99026345512768	4.13426291158807	4.17735851880174	3.86550308188738	4.04713246044687	3.61487407371309	3.53372653889564	3.69115572968591	3.39040914530772	3.92089498826942	3.49222119979123	3.50696910696881	4.04734862824289	3.79456501351732	4.17810033499421	3.48913284403739	3.2600793981088	3.34460799247527	3.3537031584804	0.988935541383207	0.725640082187838	0.912629640984633	0.499229851388803
ENSG00000048707	1.8021391039763	1.61907413213789	1.21391982702705	1.28376455086118	1.19484890999155	1.18739753614423	1.400693425413	1.72015419466634	1.85286700884873	1.73109046792891	2.03896821248936	2.28031128965697	2.57299401055647	2.47461428132682	1.98739849361848	1.94142542126963	1.85173441029368	1.80249566818041	2.10597090414901	2.27325835411684	2.24758082377672	1.60056845947412	1.47520132222435	1.92935561025815	2.81003998405539	2.64299270882681	1.89974670819225	2.0646008987591	0.00056028899162197	0.0115187432567774	0.216834096988259	0.0199065120259925
ENSG00000048740	0.899671471691848	0.890546113465648	1.18615582235628	0.748454835426138	0.918142684761237	0.630334767384894	0.835522092049066	2.26042387717796	2.02165447107585	2.64970629947483	2.46391254285787	2.51934651552	3.25985161766156	2.57970132485757	3.65466321449194	2.99392827412976	2.79785350037249	2.85658532973059	0.765551383607351	1.84141534458337	2.57654241982923	4.97320516864042	4.904610816987	4.75691400460987	4.25607090857529	4.14960666764958	5.10372625052398	4.76447128686958	0.000298441095917827	0.00921491098177421	2.13050561569485e-07	0.00110567066852127
ENSG00000048828	4.56653081442949	4.22570648345987	4.1945395224832	4.09198281654409	4.14177144733005	3.9337105012468	4.02553913152275	3.82747449937716	3.81051991930493	3.8309036238095	4.10207995950392	4.18464395426717	4.35449070180395	4.49373910945881	5.72753256229161	5.62340794395943	5.87634507624904	5.75844480421229	5.68339622610473	5.85165427177649	5.77249174608428	5.01344175627742	5.07491346983532	5.34174631759145	5.82122309955812	5.75196627019239	5.57299834492013	5.55936611859673	0.751637681554729	0.957444392585554	0.121624799739425	0.929761561556056
ENSG00000048991	4.64577316326934	4.38336445595755	4.32368358533829	4.26334828754194	4.34655812350322	4.30018157967707	4.26881352069808	4.46744956917803	4.60081791991597	4.37557782273202	4.54218364618595	4.64219333096451	4.71923893176043	4.85319022843851	4.0529281935158	3.67876035314056	4.03177515296424	3.77386002203031	3.6711975951019	3.8176661330044	3.86953212491099	4.58673073756224	4.5766167477504	4.30392711310198	3.84260597455097	3.59042222373273	5.00372497398532	5.19066784157793	0.133307035651841	0.392296240405622	0.0155099301335217	0.735198243010252
ENSG00000049089	-0.794035912128661	-1.21805025226539	-1.17236933258559	-0.247712073978631	-1.3161175847701	-1.02389258749367	-0.369510188539615	0.333586298524784	0.83245005784941	1.38018015028613	0.479381547810346	0.294425278138493	-0.76568861230406	-0.534479946353893	-1.40254267259375	-3.73675124314563	-4.37194463647726	-1.68644352370094	-0.176009038972123	-2.50325081174332	-1.90005994065468	5.72139319959748	5.8947380732509	6.99905801549839	1.67768130964949	0.27905201012536	5.56975398355255	4.71308105746289	0.281934537806367	0.487647460816825	5.05813402709242e-06	0.0485615474704225
ENSG00000049130	-0.174084207567912	-1.43514023277104	-0.793779186661402	-1.24009905929461	-0.781038207473101	-1.33200735555687	-1.02210913614278	1.88883509589504	1.715359710871	2.10288373192969	1.51334187690894	0.72622587096195	1.32514869290771	0.627780835930301	5.72197083514389	5.73360986331389	5.60287163963399	5.67210229340096	3.27956193087796	4.63295313954033	4.65586634399727	-5.26128070512557	-6.10434878872732	-7.30113947681003	5.24057527483445	4.50722818654219	-4.84675882225937	-4.32244595898836	0.0134506779081348	0.10528477755773	1.53352985959595e-07	0.839956735060223
ENSG00000049167	2.86055312548695	3.04833269790463	3.02079090901903	2.92526204704155	2.93040821214151	2.61597187307992	2.69378727748786	2.66903642952418	2.55315955582534	2.74265972909929	2.76718317008446	2.65972943444055	2.36680767758183	2.72394060537005	2.96144805276465	2.56527315692057	2.68014919492709	2.80942250239659	2.71162588251083	2.73623645835668	2.67469357578898	1.68432235513098	1.42856782083006	1.22798412408041	2.01503034219908	1.98452030840979	2.37957541794599	1.99353173676805	0.238568843575011	0.644359957720317	4.04989951087176e-05	0.0382027565323896
ENSG00000049192	-1.23720477169517	-0.657250355254572	-0.940872573600797	-1.03861802224046	-0.999179481806573	-0.915676966181179	-0.562198300456644	-0.771159488055653	-1.47630543674096	-2.32236354492644	-1.12562222241526	-1.32827781037879	-3.05001005669849	-1.60049837964332	3.3140430497175	2.94851196204793	2.6417053561167	1.91471986429695	3.53723681099319	2.90909283802791	1.4213344527266	0.162488429580651	0.0907738934334676	-2.17893492331969	1.78530281828072	1.40406022642142	-0.539461176618871	-1.03244270128206	0.481765465250924	0.859351370015012	2.54946998517115e-06	0.0940770659443543
ENSG00000049239	0.881248312178815	1.23515056225028	1.08719155191414	0.704258680316297	1.10717571927097	1.75608642718204	1.48282577452453	1.0204960786747	0.701842199402694	0.564898627490312	1.17367658184576	1.97719960004499	0.499249927030246	1.5694481394388	2.98057273654965	2.9123880365083	-0.394723061029145	2.62882077246797	2.6278282399712	2.92560896927934	3.34885331676601	2.93271486486005	2.82440241069726	2.80352523079472	4.22453238992293	4.28953241181067	2.94262342949019	3.11947897887883	0.958375581195971	0.727187871414237	0.00367022794856043	0.00158786484254759
ENSG00000049245	4.22614029390675	4.57116041229193	4.40402017853244	4.44561513210377	4.59375280063841	4.20724477432309	4.38356046977524	3.9404257049939	3.90828210057789	3.67207123652538	4.1836437974902	4.13874098219905	4.04711946989701	4.12535387128034	6.2285516962323	5.90834240169288	6.1991895740457	6.53637673525868	6.81349632915399	6.18073621700867	6.00279828618333	2.82693850669168	2.85056914997104	2.5467308264427	6.22594345665769	5.93433543781658	2.56758965940654	2.66378754892174	0.0781561375715573	0.506736963056961	6.68863803385056e-12	0.50400992998604
ENSG00000049246	3.96447756372199	3.06710677803006	3.2744080369022	2.83349706271189	3.39727979619732	2.78112796887224	3.07317632945858	1.15168341696462	1.66916504739186	1.42347264010131	1.27748976576885	2.30155447361192	0.43947749805472	1.58648369565846	2.74633976000615	2.37715392906711	2.35610359665483	2.19001358329189	1.41585776678712	3.1391577083366	3.03452826131266	-1.05544200836452	0.71997078465475	-2.65336250323327	2.94018886983807	2.36081361413521	0.789547405415493	-2.23813506790104	0.00023609753836764	0.0469904430120138	0.000936020755833015	0.878631033354556
ENSG00000049283	1.94037306856937	2.17549203381773	1.78650996283213	1.78575934176779	1.59610857809861	1.70421929055223	2.02526535238917	0.871372596622925	1.14474889603796	0.479730571838167	1.16933711708841	0.176777028456643	0.374312604007239	0.95076637338539	0.289421431469641	-0.150333882202668	1.96432982585156	0.241015750000291	-0.402284247336337	-0.403775709072454	-1.55491291177046	-4.10702599901066	-4.2364120062454	-4.79325235533788	-1.69206286228972	-0.823385025449088	-3.63429856679582	-4.47309560934777	0.00185230100023283	0.0453586740975911	9.69126666174642e-06	0.196749384779259
ENSG00000049323	3.64515841500805	3.82124900490763	3.45612879485705	3.03109008966422	3.58556470006456	3.44384754470614	3.59448096315234	3.29994881856068	3.12495072018583	3.52208177129894	4.17763135683745	4.31142756786009	3.82951849578337	3.53606229307404	7.26127981269977	6.99120968422216	8.09151938692832	8.1493141573945	8.10034537308053	8.10073797588758	8.23098450544272	-3.84011639078598	-4.73440800164087	-2.95581298149608	3.78976396953	4.354833084767	-0.113144068898307	-1.11338390448655	0.284513438441484	0.128800833799212	7.97812358592919e-14	5.32571729795872e-09
ENSG00000049449	4.43318340840158	4.36778773806392	4.47763873099491	4.53247373298853	4.67435374485451	4.44332561390608	4.66052927945512	5.56276091691929	5.57215525271353	5.79433383064962	5.52367861163321	5.70723625049307	5.69200448182933	5.04590512668385	7.28641849493342	7.1275337715786	6.94030346425451	6.33934509611861	6.91360900040628	6.72621521739176	7.12193801778444	4.64833641725219	4.77623539669437	5.15534705488389	7.49043877759917	7.53037996354229	3.68030306797385	3.94262647114868	8.88018713185337e-05	0.00422666062459513	6.16266753180776e-05	0.0959940419133914
ENSG00000049540	-0.0899725775172241	-0.22606326299882	0.0137056418998687	-0.562057861550668	-0.311477595063941	-0.65669072129357	-1.36509074902356	-0.726196170505409	-0.614459420879471	-1.42347972771164	0.869202642312586	0.722962517546252	-0.360425917977806	-0.737516899489187	8.54071843422071	7.57886192126319	9.33648388977173	7.96998575112448	8.54340799680094	9.13752370920668	9.83144299547371	-3.02442175791898	-2.50895474896245	-2.15268911268795	6.53484714884299	6.38936480400961	-1.54806004270105	-3.37610654506706	0.760100275064578	0.573099723684879	1.29563416766845e-10	5.39729798505238e-05
ENSG00000049541	6.41151095751129	6.57377930638499	6.6964183468466	6.77162975263476	6.66567530459189	6.65256312300941	6.83376810726906	6.22347365059234	6.17614865338443	6.01102151503095	6.1176201449378	5.60702476290078	5.91773812356838	6.05395370861805	3.87515553178313	3.54698333576331	3.07093711855761	5.0688197201673	3.9753787783481	4.43733421968909	4.45609207413076	5.34089121400917	5.52769473872489	5.42193388170378	3.57315848067038	3.11734162000978	5.91702339438613	6.00334804570078	0.00139964118931512	0.0163540690435169	0.182191954288569	0.215899352536062
ENSG00000049618	3.9866205051529	3.70788476879131	3.5715342267599	3.50480750527754	3.46093363420822	3.47521412804624	3.63159441139838	3.39902694659459	3.14086102369384	3.25571008808049	3.62344547923267	3.85378088896281	3.8424968683457	3.75484649815481	3.28548121438071	3.57940237065756	3.25972224499803	3.06867256628004	3.15030737502393	3.28372462014211	3.2996120310907	3.70837701245887	3.88144472049671	4.16596732390532	3.75060797068111	4.07262082738694	4.67292918010676	4.19053578143236	0.971958619337483	0.753704505264784	0.000115007606936984	0.0325629823526537
ENSG00000049656	5.91769960031635	5.73789692223901	5.84839720041363	5.66394227669208	5.66691943705449	5.79508573759402	5.82610287462624	5.88212621699964	5.87624474689235	5.82156300330532	5.88782981267193	5.6286796885628	5.99654237440112	5.85455492264103	5.77962111685161	5.99771767714289	5.91166438476658	5.80616201717362	5.63672698776054	5.95317521916258	6.05751236613932	4.94655285665771	5.32887648572973	5.7414876670512	6.07361762366138	6.11177868431994	6.41042402295238	5.94778691292725	0.868405954161807	0.959470198308111	0.98910982714589	0.55606380704499
ENSG00000049759	4.69263347108079	4.66032284743469	4.85121600314934	4.75681217798873	4.45826568857052	4.46540212119451	4.72703911544877	4.8722501904299	4.95547400151872	4.7354413285514	5.10367174815405	5.11993117926052	5.45297678485732	4.92953540665285	1.76072397887608	2.51040720927582	2.52708318911772	2.76293459276995	1.90104322087203	1.21568436025695	3.82925290597025	4.19403288824447	3.89643834638327	3.18165102200697	2.25173111949467	1.53073730555629	2.41500479007756	1.50083158252328	0.267148415882341	0.453221520456025	0.607742507576707	0.803927694437049
ENSG00000049860	4.36271932846389	4.12573747994564	4.39156289255307	4.44882769237605	4.78116635778109	4.60902464612091	4.48263435097006	4.44590014431137	4.57526547847997	4.81362668676986	4.30071716717626	4.49095921973261	4.18746014290875	4.28953880272856	6.57020627734472	6.41800824160897	6.54478854675948	6.01169460860443	6.33466381562305	6.4257739402367	6.51494124002111	4.16674889963436	4.41687212795024	4.52941387584954	7.02078500818787	6.86983404104719	3.85854612682461	3.70395118100804	0.910662789993875	0.890669632126492	1.97574418499527e-06	0.0273918314000173
ENSG00000049883	4.42247504731809	3.51940917297162	3.97093465041954	4.10302315948109	3.88836008440986	3.75485601923827	3.95362248163991	2.81876680006317	2.70305362398843	2.63921923514831	2.93135454076437	2.88548560868774	2.40628547572244	3.07416179873871	3.75736664372477	3.6816681656961	4.19460737606316	3.96725288897964	3.52566827910764	3.41813122475794	3.99432494261037	2.64596546127325	2.82582722236705	2.90904859335113	2.77824698417023	2.59697622910527	3.01153407845614	2.47610717190481	1.39157040044391e-05	0.0059771024346286	6.89740431714798e-05	0.0160312801704829
ENSG00000050130	4.20773218691757	4.28466701565183	4.46581079642487	4.44204539618004	4.55346955646784	4.2691760497278	4.457354417123	3.91413486820821	3.94709080254413	3.8085662664902	3.88131739997162	3.70473336024834	4.14392045351777	3.94358614409037	4.87264472139443	4.84410224634584	5.06514479274751	4.78625712607038	5.4278344570907	4.69950802830111	5.29890474859352	3.86699035284621	3.97991794480744	4.11321781954467	4.73985903507959	4.72782262041904	3.95897116091478	3.7766119834132	0.000974228682791016	0.0125948453145084	1.15964582147638e-05	0.280950282963575
ENSG00000050165	2.60173274876728	2.88466771641686	2.47484618197356	1.49969901453746	2.78141399382782	2.47376416609931	2.4476193557989	2.83900647739913	3.16288555015092	3.12928947629674	3.10814680329997	2.79633403952689	3.1275410417336	2.36679588486993	4.85936566761378	5.60143723784202	5.4039274524857	2.03662247118871	6.82217623111739	5.65911103363959	4.49490087019996	-5.33179045621397	-3.75223166487957	-6.60637990024754	8.47866020886383	7.80479988053847	-3.85937327451232	-3.90772859004369	0.569643548072874	0.751407539236984	0.0054278850966455	0.000152020449933354
ENSG00000050327	2.74526480608238	2.35048443267632	2.69929158935756	2.71387712018891	1.92073416192189	2.69497570362761	2.2187029529078	3.10738282604371	3.25103579473606	3.22661450677976	2.86992814983643	2.65354516593482	2.96999565737796	2.63240958977675	1.72648423135303	2.63570268399185	-2.0314827859461	1.90866270607229	2.35679514175626	1.93286567824085	2.77891488798775	1.89538093969374	2.26932749330479	1.78993283902277	2.36149853580745	2.12225727970917	3.22220244029968	2.58552623805321	0.454424237697697	0.8080462858495	0.279774851286181	0.624370643197661
ENSG00000050344	6.43445438876037	6.56704249667768	6.8208922895832	6.79336967760328	6.42358640191406	6.56513713199186	6.5761973689119	6.49840252765043	5.75516076359649	5.40223770250743	6.17497394634813	6.10706575122673	5.22409125239047	5.87544695297829	2.49511595874497	0.841997816364484	3.18338064398886	-0.157696277888068	3.39697938113837	-0.276246981159336	3.72954428239687	4.29213433393038	4.06861220812555	4.46955202359206	0.490440312899697	0.403358065414434	3.39355584991158	3.75446571375782	0.0281824977255591	0.37404441685925	0.460029867061976	0.565075993167329
ENSG00000050393	4.08813034274673	4.78924472712388	4.54079599827087	4.65395684682681	4.67147508057191	4.51551253597101	4.57453618356417	5.18881167300289	5.08920400545392	5.17065224572797	5.04926686137326	4.94238933692721	5.05016717743947	4.82485431276331	4.67507601670621	4.68974720346947	4.19875916086376	4.73008735421647	5.06322701187436	4.79161513499675	4.77814820696663	4.43615953351302	4.57520655113465	4.21245810366188	4.62014563378786	4.45752866230357	4.82871585602432	4.95971450412782	0.00640430434346472	0.102713021312559	0.384567558770878	0.667363645334522
ENSG00000050405	3.18471967082937	3.21972266495484	2.9893382348686	3.17971640675248	2.86004818083445	3.0247545084478	3.14365412692221	3.46397064485179	3.88753251102966	3.23085332111424	3.6026606188917	4.20194806418478	4.19492127945085	3.40391098011514	6.55961589712194	6.50720383738561	6.48344297197275	5.74349082566171	7.03685462604174	6.60911881386214	6.35692686167113	3.25603033745218	3.61446329437142	3.98078726376607	6.32720484326625	6.26731645160009	4.30024357496038	3.75205110298495	0.0119025303440109	0.0467825862355121	7.56579664829006e-08	0.684795116797909
ENSG00000050426	3.256521725987	2.95232842147926	3.25068285993553	3.17153301215499	3.2449739568793	3.19023180108843	2.98912714986978	3.8527726970454	3.78196620798428	3.77256198607833	3.26781761771733	3.76177166364391	3.01492756588965	3.10387999570128	3.8971377167762	4.04205662771827	3.43903044223922	3.37768257102473	2.96590936306257	3.57875530508603	4.15824375750521	4.7646233394936	4.76851499787536	4.90215699750263	4.16336426795808	4.03226464775845	4.00902274578874	4.08510053498118	0.176560255049415	0.41283439860206	0.00453099760953886	0.277192989299905
ENSG00000050438	-1.27638587146796	-1.4882773972448	-1.50754370206009	-2.16045104678962	-1.4626903356048	-1.94513026497378	-1.87793444940647	-0.397262455164087	-0.506065796672273	0.178442664277068	-0.349252881895839	0.00778380958950153	-0.217515713688222	0.188361206666373	0.0675414727624504	-0.955513085497878	0.316501544964091	-1.25901878547639	1.06606318244936	-0.529980200480225	-1.48644588833751	-0.619629882093663	-1.1357479379472	-0.821735230155205	-0.482835485311012	-1.20130494264005	0.15048439297979	-0.0722099561119229	0.00164681770460029	0.0204526616368669	0.520139009664641	0.679936989336845
ENSG00000050555	4.13611683985807	3.74986623645636	4.19659330379942	4.74993505986057	4.1743483859771	4.48085318712811	4.32199480548219	3.02579583121028	3.41678296675357	3.11340409850891	3.96987960702836	2.70966648423511	2.95758966724487	2.55946711030545	-3.00037691862605	-3.747737936436	-4.37955097089364	-0.300104330223907	3.9260621999354	-1.89956741024147	-2.76160876597368	-4.35246292441905	-6.83336368038992	-6.01282582941185	-1.92779537136961	-1.21320412151417	-4.53977445978668	-5.34195936454445	0.00284200023540896	0.101103767368781	0.135268863175944	0.946218042515667
ENSG00000050748	4.43439749864002	4.36356745332896	4.02809460510352	4.32895414952436	4.13504225387809	4.06408881286061	4.051575520269	4.58130590449261	4.5035326430661	4.37883794560886	4.72441315003542	4.48144239057049	4.61877104132304	4.65396730495128	4.96550557146459	5.09904165024947	4.8068064341752	4.6279886182486	4.87902454822209	4.9124705976415	4.96052707673937	4.11902665456564	3.90218809203553	4.45023859359016	4.79587101151239	4.68866678644798	4.29927952012952	4.29882832399972	0.00687884356062185	0.0607040745172587	0.00106084829335343	0.547261697406911
ENSG00000050767	0.0046422322869334	0.615772274597309	0.300651054461549	0.829631388614627	-0.297041069843635	1.01214974260143	0.20368932886286	2.79245114110256	2.27419323477757	3.10871987599379	3.13403973770649	2.78382990410777	2.49809047052458	2.43871957388499	-2.91564612268538	-2.85690055501691	-1.88074924315449	2.10259268849095	-0.15170954014707	-2.29156419284483	-2.74172586846062	-3.80755580278631	-3.91049559283597	2.22967491731863	2.00023617363422	2.01593278749087	-0.593041052904248	-2.7046322054127	0.00106907138544968	0.00699027883597229	0.0621486570202831	0.00596350803014908
ENSG00000050820	5.35987776420672	5.56819222767918	5.4760978072628	5.64032728047421	5.47740647884389	5.9909058701639	5.6406516191167	5.7003446463306	6.15584176877117	6.35488334523749	5.35912062056883	5.31243126117023	5.90214627229771	5.04944967127601	5.10037812501451	5.5045310806917	5.3445553197757	5.36821446704157	5.74789934006306	5.42706027572093	4.8334350900532	3.48461258395603	3.68931267699895	2.89953019621125	4.9275176912755	4.98887747084916	3.24735568891591	3.19223231986473	0.967831126476689	0.518241355364193	5.44659956416031e-06	0.357913258549018
ENSG00000051009	2.94397537537048	3.14573033744985	3.11597772177277	3.07559266634476	3.08639032462412	3.02163910502858	3.07023642035942	2.60369086697624	2.67025530008166	2.66525793795831	2.93198916656318	2.82151569434177	3.07406654683803	3.08261054770032	3.30300627798443	3.11702202176785	3.00063817802113	3.21027109669647	3.0732539252621	3.27428812637868	3.48001854572592	3.10154774422526	3.23027429947535	3.15974047357413	2.94199246880531	3.13972840894174	2.66363571892161	2.71575051274529	0.148482504148455	0.483845433377985	0.162643670251018	0.550520088320356
ENSG00000051108	3.78681362708486	3.84811086319843	3.28685530081995	3.13061857759862	3.22106789155081	3.23327722978023	3.10847971495669	3.54138150091755	3.81540147592004	3.91706512761323	3.52887123617008	3.6575141383861	4.43702648615465	3.55772227879483	6.8854898227655	7.39567617537315	6.55500395936864	6.36928412687822	6.97554861069448	7.052822065338	7.49050319110795	8.02920302956845	7.79222104893603	7.42070860533201	7.22018457773789	6.84021879657989	6.66354801693127	6.79070043327453	0.407377321924682	0.79504635231968	0.35010156451991	0.907454846636728
ENSG00000051128	3.11994278850265	3.79654057087355	3.43746257807114	3.74928754417832	3.41655508164043	4.36664800236284	3.46491563667806	4.15699967872659	4.0393226071682	4.78820626695695	3.56666467953736	3.44004938193053	3.38509010351692	3.53203341692488	5.13218488534494	5.56161991161552	4.91923962162894	5.16099741929535	6.01862914250344	5.05395912908287	5.39113054910022	-0.593604133029395	-0.229549821016728	-1.43672937756069	5.1743354295481	5.37365683028718	-0.0573283982442807	-1.89138962287709	0.791423866975807	0.84582699858851	4.74060164799253e-09	0.944140330066791
ENSG00000051180	5.65354789836821	5.56499529256136	5.66776907604435	5.80300528974979	5.90924935995599	5.54939645487212	5.79991733531358	4.84864940751249	4.93697584333796	4.57216042096343	4.6692095067706	4.6572939229419	4.79601575291065	4.58938127692004	3.26047569165544	2.2789860807175	3.50998169032094	4.43293521061492	3.14285882634809	3.91893432474224	3.28295574306292	4.16351938356052	4.2285780761658	4.28691920323508	2.24876773011616	1.47800908377147	4.86033845177879	4.85688740841829	5.78073356887572e-05	0.00428428471683877	0.44802915006474	0.0366715000559005
ENSG00000051341	3.51677951111059	3.50823441264813	3.08424983144981	3.17448956716658	3.36516128466024	3.4971820751718	3.40251042383831	2.86175496507119	2.76515482519129	2.77441906065253	2.83590565309433	3.52742699873233	2.79200083988613	3.09207382088145	1.04950904005054	-0.355901048730566	1.33119918747507	1.9702615657465	0.817583316238091	1.39199043009034	0.286312698544074	2.63432615744507	2.68389802256232	2.68181249957432	-0.247954880657309	-1.12946836032617	3.45021297135136	3.23806999689942	0.166714144673118	0.729189732638355	0.740928079077824	0.0816915327795143
ENSG00000051382	3.75387602553193	3.76069314546593	3.58543391540537	3.59567198169707	3.69246243460091	3.38994180752328	3.6751748296446	3.66028124557634	3.65724267322153	3.38031340837349	3.60872609986457	4.01041195641737	3.31137688082073	3.50055218689364	1.94329734422471	1.82943979219074	1.7064264254273	1.50567470488496	2.24797955972865	1.96908433782224	2.47898397570815	2.5765967346855	2.29178694397135	2.73892408752215	2.6139512664853	2.08676576128631	2.94303831943944	2.99425012845086	0.904981214268711	0.529171430164032	0.00334478655939232	0.236278541597611
ENSG00000051523	7.46168794102857	7.86848661312993	7.55742986280963	7.65178658857609	7.17886553432401	8.11382060252357	7.43324599134095	8.59224968707	8.75338699031252	8.68986074486195	8.20976731337283	7.96137712220546	8.10700883665019	8.21795483454312	7.55356551351203	7.34131786329714	6.52498285955849	7.3227056773484	5.85283656220261	7.48369665067226	7.47798581293332	9.015799341483	9.31409794856041	8.3024348989798	7.80978786170804	8.41820924873009	9.17897186390358	9.46828392374603	0.0281050093043335	0.368152400608981	2.6231918487003e-05	0.0526105250653247
ENSG00000051620	4.11967064112042	4.53902793295721	4.8894387662047	4.99171527533839	4.01427423075207	4.44681221182033	4.81604840673698	5.70103927038792	6.10271025771099	5.48889058455973	6.12177196916876	6.01984064812678	5.97861983998817	5.7969735782932	6.02124690824048	5.43328665666264	4.68073814840407	4.11162007860058	5.0998356142033	6.03142929351613	6.52524840494634	-5.79962629497151	-0.551662911963264	-3.9077506212442	7.09111838144497	7.05351659950431	4.29289431885938	3.58820158676899	0.00963122059420835	0.0490580263317331	0.00260183328096549	0.0181107657667804
ENSG00000051825	-0.368175349426574	-0.275458655555819	-0.633194661568576	-0.210864740780932	0.041468115890241	-0.211702030952278	-0.440776770071384	0.282581509102634	0.159933518829876	0.569857296103824	0.610886520153871	1.11838332458839	0.310474622127687	0.821300335247961	-1.32828529685905	-1.71388085797052	0.635282857210087	-0.665510799523914	-0.98135367725795	-0.818540286440222	-1.47961801415644	0.359557077859389	0.499352266735535	1.0548305508167	-0.851260534657317	-0.907511694578558	0.642679716757302	1.04220461995817	0.00100289121067835	0.00323478501180748	0.0228328205825149	0.975046431786039
ENSG00000052126	3.47079691807678	3.39100657510702	3.30517060292894	3.173285756814	3.20943526255012	3.21384555213079	3.27450094863361	3.7997551950747	3.67928642926085	3.67413744429515	3.81867164504493	3.67793331764813	3.71461962753484	3.6321913071931	1.44300315234357	1.76418918917747	1.50307844624669	0.780793249594864	0.636387729879761	0.901226071480036	1.0689526346851	-6.34301978552351	-5.56025515728536	-7.25346339403108	2.57281446632371	2.28699093521544	-5.2932108081463	-5.20962333791145	0.00153663661387673	0.0262793449868392	1.65649464828215e-10	2.76812960155139e-05
ENSG00000052344	5.96487884414746	5.8238850473145	5.63724821586924	6.04125943297284	5.70894640269913	5.75741248839167	5.89852430564037	6.6020582058477	6.31871792915861	6.60044745941267	6.53122772124881	6.11563732347937	6.42404971520172	6.18402689629028	-5.24706730527521	-5.26151579627244	-4.31711943088273	-3.49941798961986	-4.75878029681653	-6.34711261427132	-5.00715619258712	-5.02822984856449	-5.18756647635423	-5.98217504652373	-5.55158952380691	-5.38264568909525	-4.47274291163241	-5.27570754228113	9.68331990489341e-05	0.013334782551992	0.511097987908663	0.673232380122952
ENSG00000052723	3.82673629816033	4.12064430260678	3.94005993451151	3.7058624749307	3.85483790274403	3.7791037021517	3.78931467950312	4.03177671301531	3.86091111856015	3.7261664531381	4.13091804611731	4.05427694256896	4.10312495453735	4.24922051729316	3.67988371107229	3.28326224754615	2.9960869859556	3.07583118468011	3.36253342877076	3.35576374875062	2.8774795999157	4.05865582088007	3.85989287714805	3.99985692726562	3.585144023545	3.28797953101164	3.73408737336222	3.79790147081865	0.207145368597055	0.33693344482292	0.00655398678914474	0.529553867424771
ENSG00000052749	4.26179689561883	3.81406796851477	4.14252671451654	4.05530602666247	4.13497251767879	4.06087125876147	4.06219527219899	3.70489598964857	4.17432171156433	3.97477134508804	4.00576148279566	3.75264510947183	4.79439711655442	4.49457896114978	2.73045832927099	3.02106618911413	3.13221613040026	3.20807718118648	2.68201859234662	3.17531698798652	2.88227884157588	2.81114215322359	3.06788817370044	3.35851817368328	2.57269621592255	2.68393895859162	3.78042557840367	3.8793034548554	0.936059183167854	0.636844137307715	0.997636369827964	0.450791065230703
ENSG00000052795	1.15290482627316	0.69887805403368	0.471109279886167	0.172899572871033	0.955105875184766	0.331529065455498	0.705141059991691	0.937621826027967	0.849654958142489	1.1663551949885	1.33008457089202	1.2783104260496	1.55434208764392	1.32073203984249	2.67892755203522	2.47953205373657	2.86078386820412	3.38183453129785	3.01769878933746	3.25377419356205	2.84080467313207	3.4262698250616	2.50649814417593	1.98809929048944	2.32736282923134	1.7523686246404	1.27544103250621	2.15683018949723	0.176718001718122	0.351252756889187	0.0111411121483904	0.11146820529014
ENSG00000052802	6.60074095594177	5.5906310535947	6.00417215895785	5.86710896724555	6.00060327191635	5.40112344812204	5.96606483276911	6.63786016496345	6.57997729082236	6.1551630986816	5.82939185126878	6.48278988945129	6.25912099334517	6.63903576768594	5.24981298366015	5.49660235430524	6.0991442837398	5.34391997402657	5.93954180791633	4.80194431138677	5.33118223504134	6.27881918369682	6.08211506869765	7.02837912542417	6.62703286588856	6.45316199516527	5.32479818705339	4.70132195697365	0.282110510526982	0.733233566060746	0.0187899087288342	0.0504797075473853
ENSG00000052841	3.00040834447446	2.94982823068569	2.75611231252372	3.06803309796101	3.04784721194135	3.05871296779774	3.034808707714	3.52475870238298	3.52286771161725	3.71489188497853	3.1811666756262	3.6516962333147	3.58688837260802	3.36977608079366	3.84550910914908	3.82997624781723	3.68926264647263	3.27302799501682	3.7654848248399	3.48927870375156	3.6641860833783	4.18971423859838	4.10742402404084	4.06294016771002	3.76282087570794	3.66951654280676	3.00673659609064	3.11661650030324	0.0249219212568719	0.231943543404191	0.741258576330468	0.882003599792749
ENSG00000053108	-0.0513489240104583	-1.43479166756306	-0.336237188560279	-1.99536746052974	-0.625005962956245	-1.41718491581534	-0.858245177124102	-0.730063932702204	-0.27235442753227	-0.259700631460112	0.131171584104545	-0.57142152216124	-0.949369935488845	0.13193380970082	-5.56135205060334	-5.50441266395058	-4.53087869773948	-5.40079148931354	-5.11851142466583	-6.52620150925034	-5.38584757708273	-0.12762614761377	-2.32355546557842	-0.265740493631041	-5.85684864055376	-5.7591680209881	-1.96939516054014	-2.55139963096628	0.202523602747038	0.353204508800059	0.0142688414690499	0.840858487724199
ENSG00000053254	4.92144083761162	4.35746850380055	4.6788577642409	4.50009772043713	4.55310434360921	4.15739080584335	4.41658312775948	5.1904434331814	5.01903072859022	4.81315900771738	4.78978340070077	5.20352104645381	4.82741063993723	4.99095836354583	3.85565541380565	4.37963923882378	4.22006438497168	3.14955444795418	3.73317215914801	4.06106990803114	3.62884610230516	4.93121813771262	4.67680083321323	4.61416059532631	4.6791297847756	4.50140594759122	4.31549185800967	4.04851124605477	0.0242603359860227	0.147152387307478	0.00108423244260514	0.0349748547970378
ENSG00000053371	3.62560106535821	4.40599909464795	3.87480789653223	3.93313323344844	3.90901208419609	4.16510667797374	4.15861994569908	4.21585741150652	4.45039348139618	4.23646878975285	4.27147668202934	4.5671228791798	4.30976736593871	4.5262197295665	4.36747399222788	4.4958753799397	4.79993774285455	4.39023394017487	3.94982691099201	4.20768428501841	4.63900237169216	4.43254526442274	4.49828527694645	5.15777095524934	5.36437812937941	5.52747445059226	4.98205101782214	4.66363606715113	0.0676285211687328	0.204026453690869	0.000177132971015151	0.000345484313255627
ENSG00000053372	5.38881597839897	5.31998649332736	5.41127171927611	5.29509533269928	5.52654970029325	5.28906034532662	5.36597853423413	5.13603670097949	5.13774964679815	5.00722833275703	5.13710941972377	4.67179280301568	5.53467001150362	5.36049899600341	3.90791744522287	3.70269229488032	4.76390172853669	4.5029882142858	3.72192746549538	4.15411191691586	4.26927393350641	4.32040693685985	4.55790339974955	4.6093391057007	3.8398127295602	3.53422587798165	5.44238340488179	5.35480473686164	0.172972982161557	0.197132977338411	0.739280578264704	0.46906493728143
ENSG00000053438	3.56145727354277	0.169373563709012	0.261986379123889	4.23274752805845	-0.53885093517659	0.141279860028448	0.525909433200584	-1.07981773098447	-1.30019190396641	4.60835106346519	4.93632833639091	3.16006828057397	5.07370131989447	4.30078586002841	0.0181298980485511	-0.675283362015311	-3.41172295570127	0.547473345585233	-1.07626966070918	0.593458321790086	1.28645392490775	0.536157912256661	0.89299873115588	-1.05987651209197	0.172203359979569	0.333777993325556	0.456375352960518	1.73135756874805	0.136708220426669	0.0817743175693626	0.740805913994794	0.900811419949584
ENSG00000053501	3.34287627406327	3.75898017319618	3.88124986510875	3.7632248542219	3.70368674616552	3.83059556779613	3.59869191371239	3.87576005076877	3.29781835116545	3.44090835398535	3.27087213517154	3.38676570712598	3.15072273760239	3.07546076713155	4.57874982191057	4.89331204145061	4.23509552125052	4.47865799574324	3.66962744181291	4.56135689409127	4.83643971574391	4.87423380948697	4.74937374417454	4.71033116724078	4.90908150993536	5.22365413096704	4.34279029508302	4.28553830874477	0.213014196614888	0.455451888214014	0.0537312520095076	0.0702071266605117
ENSG00000053524	-0.0336105509627243	-0.0206169736310327	0.0641607049429997	-0.274869592348063	0.0455378191994718	-0.207421995437127	0.0212422154283556	1.2374938542664	1.34663298108495	1.06554944197073	1.07851867397185	1.3024690031572	1.31872208177747	0.466842241205936	-3.79909167390081	-3.8117686889956	-0.244016396287672	-3.27311694038309	-1.47323293876068	-1.77632459775745	-0.0631202047534645	-3.11034898003506	-4.66824698421733	0.410890915647502	-1.29842369349307	-2.49696469086463	-2.55720746793084	-4.31070608710635	0.0123231998399978	0.0690847100730358	0.75837136241692	0.922856328912119
ENSG00000053747	-2.01758451612845	-4.28353205889644	-2.42245153021451	-3.4071204280043	-3.62560561172422	-2.81893920128119	-2.68099749584105	-2.17105776404146	-1.99612963135658	-2.26085491006913	-1.73165686466951	-2.04957148122399	-1.38392796155091	-2.94438423753133	-0.678909724275067	-2.06490590685986	-1.10714414331837	-1.89223104237636	0.0183107333790726	-2.4601188162473	-0.902297666738809	-2.44964030185217	-1.97401787147994	-2.10104549188387	-1.70876341094274	-0.326682239931051	-0.831935356803803	-1.22507349107687	0.11214841004167	0.260981923782828	0.964801882260121	0.691618518045349
ENSG00000053770	4.20614724586183	3.75595432135732	3.75599065695463	3.72513276429821	3.58150630239282	3.76708552527345	3.92339022470354	3.94964490275192	3.92117019224448	3.91055502639627	3.77076953532172	3.76300094140242	3.79526833628067	3.88465324316078	3.4591340885153	3.30420563913362	3.95773241592873	3.55485337723705	3.72883185643477	3.45135122718391	3.76322887068201	3.92581938451049	3.91704274588809	3.39679133922605	3.90637129643764	3.72989906072595	4.6215887679928	4.25597250430539	0.963830307648874	0.911637441262665	0.0821514247525941	0.547010204265191
ENSG00000053900	3.13785023410203	3.02109476901408	3.17549393253127	3.00784661809386	3.269545820309	3.29489058992968	3.18043940196708	3.60476198659084	3.56902716925704	3.64947284056897	3.42090800060699	3.37487699351262	3.51545884871658	3.53837463452434	3.07053944498234	2.68229780953078	3.0369468855733	2.72442545870087	2.8201443608695	2.87515833010914	3.19614557331273	3.13498880674076	2.91530267182498	2.93657511125887	3.22625822898453	3.23325500385747	3.61602491837485	3.52582884849329	0.0207432704636106	0.318724819451607	0.0262996093115358	0.200322114254129
ENSG00000053918	0.123300874137822	1.42843277767764	1.26188295392531	1.10821498017402	0.678585904231236	1.18873004505587	1.18369013121876	0.432973157277134	0.306185074011878	0.26483728835505	0.426484473617291	0.932314793138631	-0.158590595633173	-0.0731070538710137	-2.97991831102036	-2.9348793315234	-3.56103632118049	-4.40240275273234	-4.11564658992084	-3.97261482534134	-4.37861136224859	1.47956023099671	0.601039499951135	-2.22758141081434	-3.27643328038483	-4.75148212573006	-1.6609999022314	0.87957000072439	0.300105587066256	0.78750185362752	0.0547300129874152	0.910875526808624
ENSG00000054116	4.86970801226498	4.85474447486281	4.72878484564225	5.09320458142623	5.16648427015997	4.93577920578915	4.83228428824342	4.92778856533492	5.07855271119736	5.23501820014552	4.5181226089029	5.03111909818831	4.3955659989232	4.90793777193627	5.62128765154128	5.55809911408854	5.73258470176131	5.54601815523518	5.80680146134197	5.56557934375526	5.72506610419852	4.90196289347548	4.93624991978685	4.94622793066733	5.46311659795711	5.55645680987244	5.10908741524146	5.03435979977916	0.633378230253311	0.629764760856942	0.00260386278111306	0.607738230622892
ENSG00000054118	6.99762740159908	7.28888069893708	7.12389454482263	7.27984909460919	7.34157530648665	7.26210651691049	7.36043328193874	7.09095314618796	7.40631698965483	7.04292075906475	6.97693235824887	6.79806899915055	6.84742108270072	6.8466669407891	6.20734270974943	6.38504767655718	6.12024240532981	6.58794130707494	6.14362095552922	6.29189997515557	6.28416668549793	6.88364364149044	6.9140373257788	6.65386381404711	6.24258635348547	6.40015502515526	6.92252542158981	6.99362261005267	0.0298173208317042	0.0785829517846711	0.0210538105679575	0.934609269528583
ENSG00000054148	5.08241205456373	5.11411510188953	5.39982410670635	5.67912697795327	5.46347244941026	5.89810614747725	5.6415996328544	5.71592914850602	5.75327600714965	6.11698483807932	5.22727169470293	5.37795222188395	5.4233202450951	5.36206817489804	5.71136275635408	5.72959128805999	4.59197688795683	5.92306317190511	5.78770293706463	6.03582575264903	6.04263688532248	5.92758112998992	6.12626092759154	6.71715012232908	5.79973074709258	5.81497510504637	5.41826217180413	5.87195639765427	0.967408436587848	0.799526951825616	0.455059933681138	0.887518071116078
ENSG00000054179	2.58369895628738	2.51249722062645	3.46598518731718	2.59139565024512	2.73890534053755	2.85653523263781	3.21267512727866	2.45808799053208	2.57061835225858	2.4479942487133	1.64454160536435	1.53434905114599	1.4195337888172	1.13596121001279	-2.59263564484512	-2.54397191045502	-1.58138025922456	-2.4307308853475	-0.560644652370312	-3.57641945426683	-0.82478261618419	4.82309623122884	3.70078304286994	-2.53156108004162	-1.30403708420944	-1.19793223369719	1.2624804117638	1.48634829440895	0.300018591012602	0.511732995397859	0.0967585603387981	0.8289900778646
ENSG00000054219	-3.74495245579101	-5.01370529601053	-4.72289403817308	-8.26641621531129	-8.268124458125	-2.89661594487245	-4.54866231584399	-2.00887863834472	-1.86810161320179	-1.50171255877591	-2.09102653053434	-1.62866510508525	-2.89363746620153	-2.4524599316622	-5.34048144604296	-4.59020190095368	-3.62902511791838	-4.43585110296504	-2.53817826357772	-5.1958698857855	-5.11942639466406	5.69233788613404	5.35942508474293	6.33340664600476	-1.1309314709536	0.0472561824810502	4.06106835681755	4.64593941619705	0.0258236951155925	0.101874350730529	3.46581151617912e-06	0.0354446148074274
ENSG00000054267	3.01436134596967	2.81716360516018	2.78551571281856	2.7725637008456	2.90736522725962	2.79736757542206	2.9923287326964	2.38565941583207	2.71293433653908	2.85230154516008	2.87631435010202	2.74550051445541	2.71679563303357	2.69901937266622	3.07255175031639	3.17097777568104	2.85068439852756	2.82266116224489	3.16906172122553	2.94772375811066	3.13835841654458	3.37478478755838	3.34801319473884	3.79371727986631	3.24905046834746	3.10513943191059	3.38995830315072	2.95762071233271	0.393379079064841	0.853352592849955	0.0438145370847236	0.55146941277791
ENSG00000054277	3.27431293970294	2.91635774728063	2.44433676253753	2.18098084591483	2.80892428477912	2.48870448890298	2.45911616726242	4.0048110623377	4.37144317973481	3.79654822332486	4.28473086488981	4.37445526900326	2.87255988185934	3.57436767132285	2.10864840259312	2.09947893627092	2.49170816941533	1.30035564086297	1.85806744927259	2.24108678062319	1.84763056431567	3.47680154281664	3.48565017154529	4.54316482200996	2.22172020043865	1.89457644506856	3.56014668295341	3.4600226231573	5.96187395850214e-05	0.000298021853931354	0.0295981156400186	0.960087590246265
ENSG00000054282	1.12719964862396	1.33880979358516	1.26947631388398	1.31202152116292	1.2521545765289	1.22919652041491	1.50629344869774	2.14933376430199	2.21447602753775	2.64702824657409	1.5893281647671	1.77697853310119	1.61844952231503	1.75110445953359	2.55259132966758	2.56077641863275	2.6869261120398	3.02695774104453	2.31586390765711	2.69540260049476	3.22929692349807	3.02561797071474	2.93445555703715	3.18212025855009	3.27201553311571	3.39750147045059	2.95633076774015	2.91046904476788	0.0162695799463295	0.326883955948694	0.006162486379526	0.0240905195861954
ENSG00000054392	-0.695251201719749	-1.5063972935588	-1.19107383808401	-0.90377174164059	1.31339835714983	-1.62036645415895	-0.303468632383302	-3.25899319682486	-2.04041857788521	-1.55139294289759	-3.88444718248126	-3.64935097543573	-0.259416031133888	-3.23918395190369	1.45631890257736	1.56677841641635	1.85224968083926	0.612384469155318	0.704729402801852	1.55072117242626	-0.583376549415397	1.09039290074742	1.28962381448146	0.175237625903545	1.51470241729632	1.82351757739007	1.20305152322967	1.65040962019749	0.0207854241853333	0.0713410555448524	0.554782905132708	0.472370330712261
ENSG00000054523	4.26620219260079	4.11396854259125	3.93311836076325	3.74864180395885	3.86536456159695	3.69590226504869	3.9035293269549	3.19982745156574	3.03477189847382	2.67391061254653	3.83841455520333	4.23713006318498	3.92653030071034	3.99020440948438	4.13218364275603	3.94556603203711	4.31496869135082	4.18923349652825	4.49897749509702	4.21100146164551	3.88805716621549	1.67292198686288	1.48525405282506	0.930396105199476	3.76203128769315	3.47778303955331	1.34455334704746	2.32910833278011	0.375258635612562	0.839265712312985	1.16839943545239e-07	0.176891303278781
ENSG00000054611	3.39719199335393	3.84714823655567	3.7380074512542	3.61941586318118	3.54054032728204	3.54997941344247	3.4197040812421	3.0719753502108	2.89067183829355	2.82333786789094	3.34671684771283	3.19693986566155	3.37147296194392	3.150872255006	4.28803613948767	4.4880025769951	4.44069863871124	4.4190920398904	4.58171050100115	4.46448497832728	4.4667539420991	5.3566323887667	5.46409066035053	5.3193424663731	3.88659309668472	3.75332378678515	4.69977112306251	4.62663056509704	0.0585744017875406	0.411571429074487	0.9102254152302	0.060435811705266
ENSG00000054654	2.65103427709292	2.7349062381808	2.65892501204372	2.14655955583011	2.50085566767146	2.57330069627263	2.75064347317917	2.45405129872014	2.23526967712948	2.45255013829224	2.72046104889844	2.88027853973552	2.12608355475895	2.41898547780098	-0.929370286145421	-0.83171660061979	0.0320167135548743	0.180952102335382	-0.497089459424756	0.0164335649768237	1.11483026380187	4.10622107639767	3.77239693985803	3.98175223895103	-0.182680463380566	-1.07086449862287	3.40588300884329	4.16092063429469	0.98480858955177	0.581363783916956	3.06904726150771e-06	0.481055056389407
ENSG00000054690	3.41142829056043	3.45057424137183	3.01938516578212	2.96247649847592	2.73315188453416	3.00061635399171	3.26292962685628	3.06340531003588	2.68704403832398	2.90361575678649	3.0595416091151	2.93555266641928	3.562908713076	3.17399063635193	-1.36023981239701	-1.15068524809019	-6.33038939116429	-2.69764125050634	-2.1253972834379	-2.04103923943057	-2.60590098243174	-4.65131115084846	-3.72585105561696	-8.10306258670776	-2.91652049402744	-3.53551228054491	-2.05007076073531	-2.29011056257467	0.813810177850086	0.841759292186315	0.272007901708309	0.789727413797878
ENSG00000054793	2.12734463534571	1.47713866397268	1.75398246579524	1.15587639695046	1.82506955141534	0.920541096009253	1.82146450611057	0.262732124566269	0.0457167249754906	-0.141231107567608	1.51536986592931	1.47436706214968	2.21940818221538	1.8619308716941	3.76655897126469	3.57528599253517	2.38156290845565	3.43851599978544	3.13095291136463	3.48686662466804	3.40118739771389	-3.59746986014864	-8.44974488641529	-5.38079827237319	3.94886876367281	3.43767114488568	-3.22031550119385	-3.98214594443314	0.463565511788641	0.950001574271595	5.49326145654915e-08	0.513649050290918
ENSG00000054965	2.53948247773772	2.87639885283772	2.71024465913828	2.72733172659624	2.80786429247329	2.59905609988478	2.58566262301536	3.05179904626885	2.94069836451912	2.77337993164629	3.24389747047051	3.26844969512153	3.0521361811647	2.9412606343281	4.09286487727614	3.97590261128652	4.28131772872316	3.75808179015604	4.4260485835381	3.91561925162747	4.08644936261331	3.83217620294868	3.38734290646842	3.88061796275649	4.32796948686314	4.16677848340246	3.13912381790148	3.11914016425526	0.0178454245581722	0.0356738272608733	0.155135464801351	0.535693209322676
ENSG00000054967	1.72834769744428	0.827400696768538	0.733644877142561	0.993063072221766	1.3683840254091	1.18528237707867	1.17225940520663	1.11950861681243	0.881902404439874	1.7023986661208	1.2353904774101	0.64243383057848	1.62098928403537	1.39591263451796	-0.158486931606643	0.487747518071917	0.984803077719155	1.44946727757785	1.44035207262259	1.03625677204802	-0.138910395579837	3.87665343467577	3.70879352266734	4.35984072561894	-0.176419425299702	-0.166804571999517	3.72842330559105	3.62702247580364	0.982836444109434	0.788097408570109	0.00871583520100243	0.276845422391124
ENSG00000054983	0.839921996527834	1.80360047613395	1.32533526776837	1.31342539949945	1.21592515930353	1.10295897030029	1.32251217087856	1.93074279967733	1.8553296017905	1.50870138149317	2.48819775195442	2.37597908673705	1.98892125071171	2.38493846915464	2.66498793639613	2.67921489765157	2.91732336903389	2.42972977229125	2.68428841393992	2.53943079949067	1.90892607435798	2.17820946358001	1.99095221948394	2.32718209575418	3.3143832586316	3.06627144406134	0.92480456345313	1.13626344252864	0.00320096644674258	0.00798771906733059	0.814837777021816	0.0885299531801939
ENSG00000055044	6.18264923429897	6.21071500995242	6.41368339791104	6.44300219218673	6.54184010780303	6.3839074502547	6.35355392566603	6.30820433470754	6.11582868004937	6.14701763871609	6.00367721961932	5.92433242088189	5.95092186377095	5.75282196386987	4.87027071613678	4.7066097783373	4.79061761703583	5.15819493860493	4.91885178834995	4.95832442380895	4.9131724350036	5.98932009903264	6.16226595809488	5.32940255856947	4.44449695916189	4.62440008105071	6.4257865621422	6.28560626141464	0.0379321491799852	0.14917285061334	0.0342594094569543	0.278285115679214
ENSG00000055070	4.91479950377188	4.62871854077369	4.64644689416699	4.74469850036192	4.46382807951866	4.4908192554146	4.52018416750085	3.826561029274	3.7601235101738	3.52966360197952	4.29429064585782	3.97790915729393	4.38574558809993	4.17512263852334	4.24816818577314	4.56981076392929	4.17261187757906	4.95041319345347	4.43444951298172	4.79980411241351	4.35275725390875	4.95165206942492	5.08222107483552	4.98884895042757	4.25539898072501	4.14686381166052	5.092105972201	5.06177342364859	0.00203029588840484	0.0944449049904608	0.670081755948346	0.345033075991017
ENSG00000055118	0.842490934078155	1.38172674644596	0.920505354776476	1.2791234303393	0.334203815829328	0.944341779510239	0.277336245841734	1.05355999095495	1.53265895159877	1.29075392774784	0.746907395287155	1.03219974705407	0.208795287516447	0.98764533232117	-3.41936598110132	-3.36953070385399	-3.99046283290983	-4.84261002872217	-4.55793284703848	-4.40039313671083	-4.82249732355165	-2.78883358770464	-6.06723525155735	-4.92735380315125	-3.71457108157591	-2.87270547720245	-1.62766304833746	-4.82689135938842	0.86484194709552	0.968754939375538	0.513659498244652	0.560109861039124
ENSG00000055130	5.8372653056238	5.68517977592039	5.73466898362218	5.67296987359597	5.68034594828188	5.60565660850318	5.64031818415084	5.7455737921224	5.56699464272777	5.81371819650455	5.69886683118371	5.78100551559934	5.81435634665502	5.6596579150028	5.52973159895314	5.41620523676208	5.64937225788447	5.53836476724547	5.65304872222602	5.4018581523781	5.50120647039563	5.21044683464698	5.16916428805458	5.30290899319126	5.41193861428799	5.40461226733601	5.64733575463699	5.60639618062518	0.768507781126478	0.841564978154323	0.19261250569307	0.581080835479851
ENSG00000055147	2.0400771604099	2.14199917920669	2.07505309102559	1.87040757091233	2.27680860648255	1.91528405943949	1.99263312875432	1.31678645417402	1.33289475999245	1.4657268293647	1.34558076915059	1.69868296601125	1.51092127621193	1.65139949812697	3.67263792364951	3.59904431532996	3.46409470126549	3.43712127884813	3.91074492494288	3.48581448854195	3.73000399669921	2.95460113246669	2.8877120823105	2.61426470018464	3.31631359660569	3.24643025217512	2.94060994366038	2.71170679697343	0.00083087022790249	0.0450155914084558	1.22746757206174e-05	0.093601135963996
ENSG00000055163	3.30146191966221	3.71878046777162	3.41605540723291	3.83786494374016	3.49774382001864	3.68082505844849	3.29467419580371	3.90851401731768	3.65902131455971	3.93359916129012	3.96020933563491	3.87005424922372	3.93657020718263	3.98457766401765	0.615313805969141	-2.35115722186267	-0.742734461361519	-2.54326669956733	-0.451070363022063	-1.02694014361338	-3.51812911135705	5.80807817585452	5.43887997142343	5.22764972415537	0.948508014553314	-0.238364039428592	5.13470270978309	5.20813351603234	0.0976879309528936	0.302737343178161	2.25005178277499e-09	0.0211265692775717
ENSG00000055208	4.81439139887913	4.89369275764946	4.77993175301609	4.60307450214302	4.75520311735512	4.49150872128715	4.74259894423468	4.71801364797998	4.82315311547545	4.70581666182794	4.92783597390184	4.83467452584383	4.81772066924686	4.62481416233026	5.82654322600235	5.94902664479026	5.40773485937234	4.89819298554081	5.7893518731386	5.3637763303035	5.34741535745995	4.98418984341221	4.87255926267944	5.37723570332719	5.3062918077035	5.08983128583744	4.43582276483336	4.15425509633073	0.740791720457961	0.724282623367049	0.00801837586024969	0.402737330565821
ENSG00000055211	4.05282046652412	4.37800927969652	4.42164471672124	4.40954429918158	4.24204846851073	4.17657135917684	4.59409016551379	4.18280523325968	4.52645406507504	4.4546204666028	4.36062075778216	4.47080047174391	4.11173256151997	4.1982068866112	6.84310494528364	6.82246163082827	6.6282388097528	6.30453225863301	6.99515662229367	6.62284912219359	7.34121855975991	5.34721759192008	5.59452215603316	5.70499790866617	6.59580120501733	6.51716834104297	4.98811529445889	4.69593783368092	0.925310580323548	0.859732163620172	1.60185074030932e-05	0.495122028936263
ENSG00000055332	3.30422606433036	3.22234008217847	3.14188753932401	3.03307055253825	2.98644372419789	2.53401043511277	3.14824192541776	3.33752034717338	3.33281856028068	3.32729162300323	3.54996319280936	3.77371351293403	3.71029511394599	3.65777228698783	4.28988124242546	3.67628158884542	4.13466143364804	4.06798933096924	4.22495093311025	3.67380034155192	3.65225956083238	5.02054924653907	4.93801431826885	5.00804743255121	3.81927932365328	3.5288931819638	5.17820959793068	5.37604559748309	0.00958358849906923	0.0399433207978228	0.0091815796754807	0.475056829884743
ENSG00000055483	4.56535775622339	4.0918426275311	4.21039704956773	4.04987516002443	4.22234974330799	4.2727312460611	4.30598152854687	4.08306276327516	4.00415714552781	4.04364553371497	4.20837494662523	4.00361242614693	4.65520614991588	4.36812627658646	4.51369771494009	4.55363652814385	4.33446090875074	4.25530481063937	4.11517360484677	4.58024174213266	4.13949126640287	4.40631723994559	4.39954335687701	4.55419658773098	3.89971670079487	3.8291186969838	4.34418064483081	4.46616492158071	0.640019281865365	0.609484997675856	0.110866254326105	0.0412586580189607
ENSG00000055609	2.37097859809408	2.10521217773883	1.76255827508146	1.36737390610382	1.89881603624958	1.84601924152786	1.93290555266522	2.05679700706619	1.83031974484838	1.80746054340886	1.80453014829284	2.43017248331117	2.19326660994819	2.03123527505181	1.92251641122007	2.21459945156139	2.41019896357552	2.41339337869253	2.24309609828929	2.54654208731537	2.37052780639347	4.32890751615134	4.04526517307413	4.11348823581908	2.82495851517365	2.7214986511603	3.18657835502522	3.20268358314373	0.576995589654714	0.642246494160822	9.03128518578365e-05	0.259582056789891
ENSG00000055732	-4.45762071942654	-5.28653576557987	-5.93749817428152	-5.01915812552572	-3.33952387140155	-4.14197824625044	-6.09573748984597	-0.766191258880278	-1.16019869485484	0.241017621497606	-1.88024237840214	-2.14590563463062	-0.412505546950816	-1.17168363632554	-3.9978516916182	-5.52926948825951	-4.56057032756071	-5.42168961718639	-5.13838012617343	-6.5551862549103	-5.40432362757531	2.35972508529415	2.76610208382236	4.13323672554763	0.719942270433716	1.36067847935846	1.79213667289884	1.68274947992092	0.0049862837905564	0.131394227496791	4.83212159507823e-08	2.11460938479417e-05
ENSG00000055917	5.13007783512765	4.91679242846563	4.8527097933202	4.68289361446069	4.91770854840226	4.70499040904293	4.93476023436257	5.02314425004618	4.88794745813436	4.84457504152993	5.13815605657497	5.14615107473202	4.89525954336906	5.11938116255584	4.91469903979262	5.01759497877401	5.10360911413406	4.78579881798157	5.32293261835346	4.9894354964397	4.86447814176849	5.4905764409668	5.25403195824152	5.44338690081432	4.90496282382841	4.69690356809655	5.54556504099951	5.43754931734908	0.134748654461788	0.146379238875282	0.257600417351219	0.319732348293254
ENSG00000055955	-1.55986943338095	-1.27525153934328	-1.58876068175074	-1.42589776421389	-1.51886269820262	-0.975348202491729	-1.17295583791921	-1.39465101446176	-3.71586367401097	-1.63044770174451	-2.67324131977902	-2.33270024291588	-1.45459610419941	-1.93166925701199	-1.43595825667955	-1.07309318940514	1.41490857988867	-1.08894276865117	-1.41290446298983	-1.1135576039263	1.60969839489206	1.57112418860366	1.3829768613619	2.28939513347399	-0.69686466261315	-1.12199239680513	0.657473566610446	0.790360157071567	0.303330364008464	0.470703690985885	0.214202365503868	0.801117059355517
ENSG00000056097	5.53038629898546	4.99168147966506	5.04297569343275	4.96579533536021	5.02249648745473	4.89737281223518	4.99045760117782	5.09756212272457	5.18891587249297	5.08299914154188	5.11259563789826	5.39084057568831	5.24884932029741	5.39847782886871	5.81247361934663	5.82827164909993	5.72740579171162	5.42151600746141	5.6471128355353	5.71380096397632	5.60320772552575	4.9967833481139	4.98139223340037	5.07051012777869	5.61855234343062	5.4721922247457	5.47313126318689	5.25695758751098	0.233204850103823	0.419670314433516	0.00773204601337847	0.597113124889583
ENSG00000056277	2.83823236034612	2.78747324155176	2.25454143521777	2.71174292484741	2.81373506701601	2.34995941785546	2.47794489883069	3.18806652843847	2.69304819518802	3.28919034228706	2.72316388865109	2.95274784251272	2.2689998571957	2.59771742372117	0.549492560911112	1.25522132696275	1.47292047864426	0.601337140259901	1.33077143399318	0.778680130031816	-0.0925114239990387	1.65398138732504	1.29110976478662	2.88360995373525	0.918246205941242	0.435742488229756	1.8078214374571	1.82842504079241	0.462547240405375	0.652069436492898	0.33022514186045	0.890929925645839
ENSG00000056487	3.59941214145169	3.86136558639831	3.4973553303853	3.75577863452418	3.18449402601789	3.56858043228117	3.70589765389629	2.39300745386792	2.17079304716779	2.55693074614296	2.81148120713771	2.79550882569999	2.50532468527275	2.67952695390967	-3.84539757357199	-3.80066954924075	-2.84216311399822	-3.68287044730475	-3.3959644958443	-3.25390963740924	-3.65883455116619	-2.52246498111732	-3.37154765603461	-3.84177776212956	-4.14975617252533	-4.03951269352508	-2.82539763350251	-3.69529680211108	1.29513293309407e-06	0.00294471373689527	0.710312670117099	0.493536507394066
ENSG00000056558	-1.01980758695956	-0.399904151496581	-1.12306596225472	-1.16135644887456	-0.494709947817838	0.0682634531515817	0.244051329814157	0.89727854073373	0.0106064257511471	0.813004965836347	-0.176403002197907	0.40423457864407	-0.919907091149353	-0.916499101715128	0.726129327587686	-0.242646234755398	1.03407533701401	1.86235173004993	4.53910576197161	0.835532131793887	1.5348589707854	7.85640100652265	7.73133956612503	8.5809015833498	1.58850588902213	1.51761295597498	7.22055923506649	6.78268663689574	0.673813379484378	0.793766856356653	0.000340325128644807	0.942573919857728
ENSG00000056586	2.85525498596899	3.25692691507032	2.91751384699732	2.84319318761573	3.12680411641489	2.7098772201122	2.95803130243049	2.8100554917767	2.66822230038595	2.59992653627761	3.20591127487314	3.28473860417079	3.10009711302147	2.98747831170871	4.07645780188541	3.8639069555848	4.18401681674561	3.83171528696525	4.71881539756378	3.94049566688422	3.53689255880649	3.49548406123703	3.2319893046527	3.40057534835714	4.12011586800074	3.72750596104187	3.20296770429057	3.13336363920732	0.680349703005414	0.358869601535228	0.0136499779139126	0.808073968105318
ENSG00000056661	4.66721600254316	4.75279557283635	4.57406365211898	4.7766805932109	4.66574246662452	4.82276803119183	4.52966908275153	4.56248191090716	4.52346308938758	4.56346825233756	4.37341019295579	4.25682777211422	4.29384276322513	4.31884278717805	3.67677912707891	3.65273847886636	2.41248719844433	3.31283199968595	3.45106119368291	3.55408688355264	3.48745068597155	2.93327057663447	3.60798427274597	3.43880270688796	4.1292070555053	3.91409018251485	1.82646858073454	2.32676659648707	0.207098432357282	0.364663853676492	0.784533579121556	0.154653702188871
ENSG00000056736	2.09724302798992	1.82687910706805	1.59273668321574	1.7471402623755	1.84894393978887	2.16209515039308	2.13134644407705	1.8808767787828	1.88914085187765	1.8873397349401	1.64140723420042	2.01409231919712	1.61150029532305	1.3310826227942	1.24608281009884	1.14828244580713	0.294566827661327	0.342872621876924	0.685268115264857	0.72630623928234	0.849717557518583	5.42869073866016	4.42166142816668	3.93205703905032	2.70456719194682	2.49355587093079	3.15704472429137	2.40890137860953	0.85836072947111	0.95910676499736	0.000260212457323785	0.0640669322825881
ENSG00000056972	2.59117679741639	2.83019793172691	2.4934927024554	2.68065948653841	2.35482687401579	2.68907031999335	2.60072190482698	3.59268827406942	4.15523199950311	3.3506544269381	3.41475577701691	3.57177287168995	2.45142861832894	3.36783708387799	3.93614748047783	3.70929197011402	4.12611599269808	3.81334673426539	3.50582837985796	3.09862790402479	3.85304064895452	4.56149813388149	4.4090901852843	4.26198337800704	4.81731330336678	5.11396209340403	3.7013955984232	3.77831467052185	0.00697340739328443	0.0513641845889272	0.000489421008698795	0.00133317973440863
ENSG00000056998	4.76246461658554	4.70236151739916	4.86691303461678	4.06575925912835	4.49538612270991	4.56997453928272	4.43493628211809	4.75867913330131	3.51339380263172	4.85242532160557	4.41618454290084	5.01838438401736	4.36615043585386	4.83616083795233	2.33562978417299	1.47049035512865	1.80282624478354	1.22023642051385	-1.32790016052824	-0.567161328384013	0.1567580548252	-6.00893455778125	-6.16439140998528	-5.50659188969689	0.314308064552815	1.90723899969609	-5.43646223775406	-4.66449722847125	0.919620002787966	0.766541602463362	0.000478250096236078	0.790049859171904
ENSG00000057019	4.64019002517831	4.19835895320532	4.02465109478778	3.67223880238801	3.9793835442516	3.60563867249856	3.90330392716694	3.80856986005859	3.58487185258659	3.56109243430547	4.15258025147887	4.22637626847273	4.57583126986473	4.53323280979148	5.83535015577807	5.56615744751105	6.97875045449166	5.51089955301962	4.88024687930267	5.57977849470343	4.13531289606718	-0.716315465902456	-3.60889684082146	-4.58338291865073	4.93969886169896	4.52001331937163	0.0106956623935273	0.291294110474591	0.857730258723566	0.849470718694938	4.13318957252724e-07	0.280938054405566
ENSG00000057252	1.88991371270505	1.42784786581482	0.596523587798331	1.26484719651162	1.5183923475714	0.816093672550829	0.918527827196471	0.29593802633716	-0.205366820681963	0.319044598155249	0.599069387528643	0.72440596608945	0.987274251847628	0.759844692895073	5.31203055351401	5.51972847134315	5.0931708684646	5.36886072342082	5.84485407565673	5.65384547913796	4.98895409436364	5.04018576218228	5.16069579783872	4.97172368666731	5.07226105153484	4.7874401678226	4.83365573893596	5.14633777816636	0.128398665437075	0.499142831795242	0.00503805756061455	0.0728028193904591
ENSG00000057294	2.29050037215573	1.7751131167429	2.6502377278753	2.65880534483049	2.7957657594036	2.48237189125324	2.45897154727354	2.32977030759905	2.86035096289308	2.26870160476691	2.76984126711602	2.57920055101069	4.21514753667069	2.91158596858874	-3.8762980790184	-2.25940025558071	-2.89285083745828	-3.71165799947779	-3.41670932814426	-3.3189442954562	-3.67678042732454	-2.15825098238301	-1.91884547480306	1.52108304362663	-4.17977132675429	-4.05528483801745	2.48276780646853	1.35903205834647	0.51998755608162	0.842872636700719	0.254903912461173	0.762322883822086
ENSG00000057608	7.58873467017626	7.81559921540258	7.81068306749142	7.90568065716279	7.90425942301495	7.85684920164641	7.81671248866159	8.12482674932858	8.00831559702183	7.93774908398503	8.04760362554538	8.02421623598816	7.69496258476282	7.97506324035816	7.09206727024926	7.22549435067732	7.18569261531046	7.30474362019486	7.23788566642757	7.31622392006134	7.41739374402127	8.25052221917447	8.21569703076219	8.27521444764705	7.7631549247968	7.54654162452143	8.13051040179517	7.97519652256556	0.0728922216434424	0.167844328829489	7.69535898116528e-08	0.0123489291445705
ENSG00000057657	-3.32933762802619	-3.35432359604348	-2.98613623768396	-2.06930447146266	-2.52264578459176	-3.01003994242666	-2.13610218324871	-2.21766116816261	-1.84879602335401	-0.470851040186756	-3.19059577174008	-3.58239922309892	-3.17042947863498	-3.74697547722434	2.03338202241736	1.94635533181165	1.8612662716796	-0.112309641065846	2.52679268491055	1.24482524821199	-0.150046972989734	3.32417378792348	3.41618794128023	2.09088662801297	2.79209644387066	2.27390866968298	3.01303216906716	4.11178083240188	0.972530179358617	0.853553035133795	0.000861085164461308	0.0923298527802615
ENSG00000057663	4.10934037799133	4.00356698424717	4.15407771645175	4.16099714955454	4.15676825764095	4.03408551194566	4.09078402852611	4.55695247838284	4.35407157910761	4.57174930854069	4.27644599647617	4.30809633448311	4.15443594906804	4.1146811926112	4.20849724936322	4.05353617747973	4.1715511026546	3.85046736599081	4.3271475304216	4.0279867190613	4.23724540637233	3.57942980756389	3.55985496595879	3.36960976501415	4.43808825891294	4.25872268316732	4.0604437362801	4.05996776355404	0.127760847927501	0.452653623315684	0.521284102774698	0.367978363580966
ENSG00000057704	-0.202702179586826	-0.84948274415318	-0.278665491978485	-0.52554529226658	-0.227733084644164	-0.471286934324417	0.0640233077324428	-0.211799218695095	-0.36206807816565	-0.119983107967091	-0.288805123129233	-0.357858333270701	-0.51546514586914	-0.989542870828875	-1.39075835591004	-2.91222746547264	-5.66330699063918	-6.43672132025727	-2.94081160265918	-3.45295139620588	-4.77575795033519	3.98990747515016	4.09924208954468	4.93116369672288	-6.90591435799458	-6.73776819557863	4.96296824473468	3.53629474242995	0.986754826944174	0.981290624013602	0.0101768393822191	0.141607169008942
ENSG00000057757	5.61779782958546	5.76688764576055	5.7967058026073	5.81081724268455	5.84499232187792	5.88280851288537	5.87921685042872	5.86540334878762	5.81562866222771	5.82971085905416	5.50316090139998	5.29714512326084	5.54220875713059	5.50442655328896	4.66712260526844	4.50531803196741	4.46734854918275	4.848925478975	3.92006434671831	4.6545591902368	4.89156162485246	5.26685856536888	5.2187328026094	5.62757517972303	4.7372796951674	4.92636116253114	5.56825850978925	5.60269291107007	0.0909384209771767	0.0834227439298642	0.000514848531371208	0.381977809919136
ENSG00000057935	5.45444741960273	5.19725402927961	5.62901699290887	5.43079706605443	5.57627804689272	5.71613360040813	5.70114079630802	5.28711834974121	4.85214020426984	5.35611506101787	5.05436417909207	5.28157663511215	4.82714904897707	5.03929100636153	3.55258100072624	3.55601919840289	3.09121910225932	3.00442723608744	3.56600027786889	3.30812741992912	3.32524083427929	3.59545477856141	3.61619150872828	4.19097608030905	3.64892301188781	3.62921732139642	3.28740455008644	3.21433131933709	0.015404098185061	0.193212406851643	0.138498938098228	0.414801579999078
ENSG00000058056	3.3531086430801	3.09329928137204	2.92203133275483	2.34706753328901	2.84400863134363	2.31364698299341	2.92742097233889	2.92108632898935	2.30238822745266	2.23978831334511	3.35124996763858	3.86570940051007	3.51273038063457	3.46208550750424	2.6515606489627	2.77825848883395	2.78680068324948	2.65898343935603	2.63535104729574	2.92524576297853	2.25490592561538	1.37419068564201	1.00416403607067	0.52031237306971	2.33128915013856	2.01727005200912	2.94515671736958	3.02516791665746	0.251375198723396	0.159785695255864	0.0590584833319313	0.571929095766724
ENSG00000058063	2.32965601275369	2.42483073610016	1.95568082464503	2.00800828507484	1.94502991637676	1.97827569178649	2.14855412022392	2.56455941212902	2.61084246778811	2.74401387598454	2.91129472425274	3.12598906585501	2.56745219185304	2.84767597979119	4.61959384568353	4.36562122976985	4.67030926201976	4.48503553341562	4.96277798817717	4.70025836749346	4.93910898431124	5.03583489628579	4.91857031516509	4.81921431111621	4.70852268794815	4.48383519484009	4.68242836798049	4.8371419983657	3.76269910216268e-05	0.000299647085247614	0.661820264085496	0.768155460314453
ENSG00000058085	2.19029370846048	1.53232276521421	1.84420395897187	1.42763032245343	1.62752795931223	1.31588271737772	1.49116198212971	2.29956438415477	2.76974068116879	2.67895198273445	2.83279454363324	2.24443054932084	4.4002425332817	2.26649046622992	3.92174089891713	1.41564465386553	3.23082551995207	2.73783517881365	0.17016665390758	1.40912267883898	4.15025529098094	-3.538446560324	-7.54757640832568	-8.78179039962465	0.240778337859391	0.71891237580442	-6.27461295176922	-5.06313984357796	0.0946393629913223	0.41189551981147	5.36602684665448e-05	0.270199825364702
ENSG00000058091	3.78744211304158	3.41136110197707	4.19524560520209	3.95883758793126	4.09479099016386	2.72951461070758	4.26516905744728	3.08096598798462	2.97780181053369	1.93917277221133	4.16056742475886	3.71409358221319	3.66001344604226	3.4667641929033	4.38308866846252	4.74212673896639	4.36399705076128	3.10719125484639	3.48340109098588	4.30490012561554	3.6256932986839	2.78158593235168	2.45127416270402	2.07063866451785	3.51872237250433	2.97675136298951	3.57787101947886	3.40728084148294	0.535520849815736	0.84538776324258	0.0124361214457858	0.325661536249279
ENSG00000058262	6.59808106765269	6.40986521269862	6.4416693584899	6.39785557877401	6.26439332968364	6.34165683304023	6.45475607094713	6.38518500627067	6.46748805631139	6.50279130797885	6.39792220534528	6.10333193865571	6.95898689510047	6.48900139204077	8.64990619722737	8.59762198690689	8.53665486361335	8.26066874416234	8.28357750263756	8.29155671951619	8.69430325183647	7.14592985414577	7.34356596766932	6.74121528315827	8.24637783817023	8.27739483785257	7.45369139148121	7.40765422788338	0.960866494677408	0.567970914338915	3.50648743155543e-06	0.405634722638818
ENSG00000058272	3.99677884046314	3.80091110765696	3.6745020969162	3.53296284791147	3.70206644277716	3.63256016137603	3.69755532179128	4.27655994875145	4.3056086347578	4.26549773893574	4.24632121060309	4.41224153266224	4.30747501107596	4.1785854348228	4.50677149557448	4.48170105388069	4.60927866829539	4.55150485215579	5.34898527479401	4.65986451013348	4.40619138992647	4.38797716614389	4.11186082122832	3.96746339776875	4.52966601680236	4.2644560942181	4.36453577005064	4.27483217520136	0.000441230811665243	0.0116257087614484	0.0146850456676586	0.334931585895062
ENSG00000058335	-2.06979160150787	-0.595715268066166	-0.826133937128276	-0.865028560393057	-1.7767619258003	-1.37261277052892	-1.25017959512097	-3.10306581496812	-3.44763369472575	-2.7292362543663	-2.62856539309053	-2.06264530757211	-3.07579051522213	-3.30698947047241	-2.93689545559708	-2.86930974583988	-1.87898401362785	-4.36324571467328	-2.4985394217909	-5.46461223711799	-4.35562445520028	2.40930238235261	2.37603640507379	3.39155434325598	-2.00647155563992	-4.72672644091066	2.97431040545664	1.65348171870052	0.0773095421973656	0.481223659456969	0.000478270469133815	0.94472903543205
ENSG00000058453	4.57234067747483	4.94046655967912	4.91666319633277	4.88240733534516	4.91057498058221	5.15591298298455	4.69325683927871	4.56011171385981	4.72483777420872	4.82568020786062	4.09381779666753	4.30883356548825	4.2296667255005	4.72599299674473	1.84688158564835	2.30413525582038	2.0347584678345	1.93449207337955	1.45335347052127	2.43898670061556	1.85258296647763	0.838682551164752	0.857673162016004	0.866339064211513	3.16004141406281	3.43106971402514	0.756628256554702	1.57898775847333	0.00230481203491507	0.00648838223585231	0.804047462326951	0.000966435305918194
ENSG00000058600	5.64606946872846	5.36867951145246	5.37960750729107	5.29526331366816	5.44278073618157	5.42149351218767	5.37945383774675	5.51355257783237	5.51764582234702	5.35465073553322	5.51379862408408	5.4996471097758	5.85275647624948	5.72152465240953	4.3363876645402	4.36672545338929	3.73982573036384	4.41270294520333	3.52989515853959	4.79045922774276	4.28385615148209	4.64025075295017	4.73756511173046	4.773604139622	3.55193518582943	3.80603066430676	4.9503514045973	4.96982575041642	0.458003004073993	0.803975027208806	0.95284560028927	0.113614013254994
ENSG00000058668	2.53088681224365	2.99495136171373	2.01505500055875	2.40489288448107	2.24411202273	2.12066349134273	2.06172783571466	2.00139773727892	2.49675508864972	2.52408029210882	2.43925867395259	2.88054449090071	1.97452111231385	2.32251943899553	6.16276078598333	5.8087592206446	5.77830941624192	6.3167774752121	7.40395001670042	5.9699321768211	5.66619203654276	-0.558402067442461	-0.829093032260066	2.05677738599738	6.44914167010041	6.30766766403487	0.302795042918969	0.66691966048571	0.812160530150278	0.68878701237337	4.25411015972405e-09	0.730074138946587
ENSG00000058673	3.86425100607379	4.12536465741529	3.64799336341728	3.67053975463007	3.40739949978624	3.57976977281821	3.77080396377091	4.12397643038109	3.97996862632538	3.89828827971726	4.3003544708227	4.361641383957	4.25778212574116	4.19709035515247	4.39264812118207	4.48097721061104	4.80558452215208	4.47870056068107	4.2606360369903	4.44420781725185	4.60620596464302	5.44696131548468	5.22440749104678	5.1817821494327	5.09388573963695	4.86777293514282	4.72428792712167	4.60057355287928	0.00994547581587013	0.0341974394936056	0.00137907489050162	0.0703795290257193
ENSG00000058729	4.25687157864318	3.91260707284535	4.47401796316972	4.26542666307931	4.16070145567318	4.11633001402586	4.25044385151325	3.64079418286912	3.70816520655353	3.75641776095661	3.45646457793824	3.49179359182414	3.59938422195779	3.73799476581441	3.85877929726449	3.67863898633487	4.14792629833406	3.88477105627237	3.61696209920327	3.73817527663733	3.66871229114506	3.25944642574968	3.30757325908279	2.74264376196939	3.59748631469933	3.56296334683694	3.80776059685575	3.51310448940268	0.000342678481665477	0.00604384526045292	0.0252998328190986	0.490440493228205
ENSG00000058799	3.81837403904069	3.91489411203374	3.93882886201707	3.99916167099055	3.97476635392858	3.88275200317719	4.00475456110172	4.22392078462877	4.0422012468491	4.36498903824991	4.25667709148945	3.99726609117271	4.48047263856489	4.21486163718589	4.24744461415094	4.3827567743326	4.77787405179185	3.91160524619632	4.37609328632498	4.17706005762628	4.49292028247138	3.92037604944255	4.19255018910612	3.71542348683896	4.04467510014227	4.31010454199589	3.79856373202552	4.03877689761195	0.0890924118753789	0.499072082459935	0.0541908109231764	0.620498406719452
ENSG00000058804	5.02383459880329	4.97102474173804	5.13050547446398	5.19425605056033	5.34674978862992	5.09624128554152	5.16896588173735	5.29851008745632	5.01022156268622	5.23095227477331	5.21434873574441	5.30677757748132	5.33711150545809	5.4929560437563	3.32206539364841	3.01470016358783	3.26740931441193	3.79335636300916	3.41307113893152	3.49064377563917	3.38676057011002	4.01389617586785	4.12384305197398	4.89754969199256	2.66239476646205	2.06655877563752	5.00016757533167	4.78307256724415	0.485528910904716	0.723533005680982	0.794100671800278	0.0361642826317389
ENSG00000058866	-3.77839312147877	-3.30354352111768	-4.77504775077595	-3.13610434046424	-4.73433133305888	-5.69836105501147	-4.67589679581656	-3.52994179825146	-3.98361781685015	-5.64981998511789	-4.06234438498765	-3.72792086299765	-2.6896069152414	-2.38025242486619	-5.22919219309623	-5.13735561769121	-4.10649034834849	-5.0769434801415	-4.80139238750194	-6.12776250773672	-5.08542033416334	1.36544529529792	2.32033831789719	2.73298581086257	-2.35222064757152	-5.45958412397004	1.18720223947321	1.12624971039051	0.668177990529935	0.866935868490227	0.000159875540506155	0.574629947713825
ENSG00000059122	2.4881840407031	2.3245885050358	1.75116570138711	1.88159019465612	2.44590548818982	2.04253250912453	1.29893617873992	2.7903223203904	2.60987596543795	2.85516314163449	3.09094829854289	3.05588550389261	3.1824668958696	3.62246781181526	3.74755666237943	4.66122427923156	4.3378153470759	3.96967810740494	4.28206538717786	4.15811214678318	4.61400121078475	3.99280847997396	3.20897270282363	4.52746628957691	3.8209175051521	4.08820202920877	3.35493975041718	3.7806083907246	0.0165955579888351	0.0992266116238339	0.150883826404625	0.625781400063998
ENSG00000059145	0.905573647562433	0.947753193419275	0.0715703318429995	0.711470981955337	0.856265403925471	0.743397087923439	0.849617356384455	1.13470702965377	1.01987591788697	1.22070598747179	1.83722132749129	1.24331298177162	1.50099932173669	1.22502010352711	1.27525550117527	1.85597693146497	2.10902343054865	0.828589542447814	0.704533268024261	1.59725549814493	1.77712015806276	2.66407674080719	2.46236102920301	2.55503864456441	1.82926714291376	2.18213676869159	1.62018657669369	1.91508254566071	0.0790266878660532	0.157173092216281	0.0212310340583522	0.339647077424295
ENSG00000059377	-4.56678770501908	-3.15553830497317	-3.98432203302387	-4.16387368488697	-4.25625120454914	-3.97446989009436	-7.32224135659212	-2.36420538754233	-3.02737368680074	-3.37703412572689	-2.51895279490266	-2.7559648682498	-3.96311300455391	-2.42702999184177	-3.59411086362984	-2.800146017638	-4.14845369518279	-1.55909118970394	-1.92890550102528	-2.44335130470117	-2.19626649686132	3.70067204146822	4.3996039285387	4.4478577964525	-3.88714351955251	-3.78952303925309	4.93273063495688	5.28241184141384	0.13798519946672	0.30085078830491	0.0021845897455892	0.581796232654563
ENSG00000059378	-0.219257790527579	-0.896166037198786	-0.627496056904413	-0.352830989067239	0.602519692088131	-0.408770355893006	-0.546801271490121	1.34779188252824	1.18723080509213	1.98230500968266	0.933988636477435	1.38637255573965	0.687259294347784	0.404297343799291	2.64846676436928	2.36914885000617	2.01241438583505	2.86410187528085	4.03378882767253	2.20093114350684	3.26073765147721	3.79933948166761	3.43579546977077	3.30994702794869	1.89167488509812	2.28988333980639	2.55250322170228	4.09208890989375	0.0213689750791071	0.0990114488246153	0.939634143447463	0.38820700658061
ENSG00000059573	6.14290684674357	5.8675700860033	6.07054210841983	6.16920710155646	6.1772296531957	6.16900971880163	6.20902595288111	6.44593354527807	6.55104127746808	6.31687924520606	6.39544166736511	6.37594682483161	6.41197195257262	6.35853580785982	6.06837439339824	6.09778417274645	5.85064931528264	5.91186888102673	5.9932737439845	6.15921496065592	6.39886195088413	6.13675572638833	6.39640121930052	6.39860156169828	5.91723146747827	5.87929531873756	6.39852973190615	6.31938061737794	0.00690206159185454	0.104147870750941	0.669280340510047	0.357929945819985
ENSG00000059588	3.86957121298081	3.74183730198996	3.53368230887739	3.51983616491593	3.56702099293865	3.35339741037169	3.63174269333661	3.25024078995063	3.14750294096694	3.77653370519743	3.26452659090564	3.86949562350862	3.32328596380532	3.65047629280939	2.82968480927527	2.96197064785207	2.76930020718877	2.85213790628845	2.47517179846434	2.75369553969486	2.36018070976247	3.99408872745708	3.80286323677001	4.49795557867226	2.49473472219594	2.44567203127075	4.15872239599792	3.77056672177575	0.623542248314787	0.96226356010273	0.00742831760903063	0.548908123186544
ENSG00000059691	2.51082319488128	2.11833688496926	2.47900633516614	2.40506915888532	2.35645877515831	2.02652638018602	2.51455016532862	2.04617669575005	1.89477994264433	2.10394132930738	2.12901025161034	2.09006718083941	2.27845173418641	2.15660450986493	2.64627970353932	2.17339440709968	2.18717118982463	2.51185274385597	2.13358935652979	2.08349345745522	2.21769864463029	2.14520973583344	2.59149078197944	2.33913717947946	2.10654949571635	2.08579187621133	2.72779236696669	2.50589162240519	0.14432846976979	0.417114268224181	0.960448409250703	0.606963335437141
ENSG00000059728	-1.07849994226313	-0.618769068109709	-1.47085414289135	-1.42432346077514	-1.25686897226283	-1.83562734117614	-1.76350501794047	-0.250074570285851	-1.23758456499252	-0.409255601124171	-0.99373011310515	-1.38316462391499	-0.237394738693982	-1.56080298961401	1.84334526132435	1.99934280938735	2.14920749953292	1.40738522957257	1.91617327049574	1.93524118486425	2.95014377711057	2.52579337063202	2.23959907563971	3.08321635581255	1.50027388815942	1.09680649106043	1.36787164501442	0.942931197859402	0.669850700529896	0.938855432364102	0.416499087484153	0.343337003756801
ENSG00000059758	2.32661001347936	2.09774934645911	1.86598093406572	1.7409675638111	2.00280004130938	1.69480645670252	1.95860355111938	2.48648016979167	2.43939349111847	2.55333424706703	2.47548221111985	2.45205880738601	2.39204737392019	2.3617946296409	3.35531434251158	3.46063193075409	3.91715889369419	3.3813945365668	4.00948509090871	3.61978807318101	2.94874303300623	3.92650070583876	3.73313922218293	3.6922561333774	3.85186833695016	3.37856937372169	3.21678900935079	3.4001240884408	0.0247628826892229	0.14790645301619	0.644523596104645	0.822536175464115
ENSG00000059769	2.98895249429403	3.02499247173254	3.1923903298971	3.06622415669961	3.05702143550493	3.14349435481707	3.329113780201	3.19228585163375	3.29944482825387	3.37315635319303	2.7555365769977	2.73857907856048	2.8198380292438	2.64001066633762	3.02411460085677	3.24694441128023	4.3992162054033	3.25457741501462	3.14424365848143	2.74533464378725	3.70477772503718	3.06865614926537	2.97748617098147	3.26755097118832	3.24654167845084	3.32242860219514	2.35984108182773	2.30552246939681	0.489896050374059	0.476513583813494	0.332567814453329	0.966573080051691
ENSG00000059804	7.80701032731593	7.94609086187418	7.78489340745681	7.49915990220034	7.76369843617578	7.22779121645283	6.78560357436213	6.88308428707343	6.68714703008155	6.66722742403384	7.21647660856174	7.62155581513933	7.5885463688867	7.10806948393305	5.27019643588461	4.78367835305298	4.70722542358004	4.41304091572542	3.7775798360562	4.4312067776125	2.29391052271437	4.82663444501759	4.62308925453515	6.52020161212043	4.78241568755818	4.53799598995722	3.42162752869595	2.90550245505253	0.477448451394818	0.90348142856171	0.568616809588265	0.766118052390057
ENSG00000059915	-0.452372685212307	-0.867816167227428	-1.1127287650056	-0.759848597086741	-0.986327310115373	0.27153100323333	-0.664716184158986	0.525915761042334	0.423264458977654	0.636140514619107	-0.339005186975428	0.277907899610775	-1.0259369258454	-0.507901862556686	-0.586211656933288	-0.306373136040045	-2.79365325328843	-0.289783058899044	-1.63892938678717	-1.38660483114152	-1.14712795443909	0.00811698730920751	-0.330778345035192	0.240621429928354	-2.17403118979163	-1.69337408564327	-1.02865683834527	-0.879463196399562	0.183781601360816	0.426631657154753	0.966348967418663	0.516632329591107
ENSG00000060069	4.62333837233953	4.60230392597829	4.70321771173123	4.62726484694223	4.67158908248017	4.49835980032144	4.6241234706684	4.05163581769981	4.1640319993042	3.9339343448926	4.44081203416996	3.76569835838959	4.60084106892905	4.41673908722487	3.32294905291001	3.31823358561376	3.14214571469318	3.63966099812578	3.39699121216214	3.38178194837898	3.17376056181806	3.45832353596977	3.41365432251785	3.63604841535098	3.36895915660681	3.52179762259407	3.94522607997035	4.00986483243787	0.00498532289062513	0.0389010663718489	0.295740663842476	0.841422791438216
ENSG00000060138	4.63381575288097	4.52615137376096	4.59502282865432	4.62441552891474	4.79461754597957	4.82358145299796	4.87980474493416	5.40372442368623	5.43171372429246	5.44358483928478	5.22922791292977	5.28805613652318	5.19499176443721	5.00450503924169	4.82834423863984	4.76378419505515	3.98820854796191	4.52061697437116	4.14096138148892	4.74451274814723	5.3404968035989	5.10563100929067	4.82157036031141	5.41078184226309	5.04053854475384	5.23477944340213	3.92157484134174	4.33997655234905	0.0228837645260493	0.172479326333556	0.184833169357058	0.229794175358297
ENSG00000060140	0.301272047244278	0.593268669348373	0.22051179527823	0.51303574258409	0.193479296375389	-0.716134781684324	0.24257479241839	-0.272875315455924	-0.460583014534003	-0.817382621970935	0.196936453376834	-0.916561734384232	-0.466319056445591	-0.783894601770815	-0.77224022813291	-0.716227472926775	-3.44447137077957	-4.31196451685862	-2.44444829859043	0.443073557306896	-4.29636240939261	-3.7972969887996	-5.48681542006215	-4.3152312601202	0.660938196643188	-0.75982446884581	-1.79994286836852	-1.46320678146426	0.36571678961373	0.682113689709201	0.695651644124734	0.0992911203148395
ENSG00000060237	5.41775819749489	4.95625746335171	4.53736896914861	4.61501132067409	4.7116964183987	4.55943469456074	4.62341063004946	4.86897448915437	4.6382208845225	4.92036993988092	5.15567911038473	5.43015139741824	4.9066388667847	4.98731239873125	5.18342023809357	5.34378943942978	5.23253925161536	5.30579229747592	5.53073186962662	5.54754429807748	5.18237007049177	6.64775280845913	6.12307465490514	6.52565957293324	5.13917524560746	4.97651990767383	5.71052100948439	5.37827103078336	0.180167228666115	0.146242228290395	0.237395568889346	0.491797344272527
ENSG00000060339	5.68178260328339	5.18369672955298	5.35424910188237	5.4039315321435	5.46811437211741	5.38294623657446	5.32645333567865	5.53768554794684	5.47644708349668	5.64759047605867	5.49810045428131	5.26684858241243	6.12072092858476	5.84460757024671	5.16447826721132	5.0528516504586	4.84789603381342	5.20253671548921	5.20653918393957	5.00618497323815	4.97118823923357	5.01414145755359	5.011324007944	5.05674868861041	5.19456217211538	5.26276706058475	5.8342655677478	5.85540722759306	0.434792562764041	0.967157698520188	0.196024810546391	0.655130695752514
ENSG00000060491	4.36308546554725	3.87719054216758	4.25435451781343	4.53518039053855	4.37912996935337	4.58510920806736	4.68891103452612	4.44821724433739	5.0660477144676	5.02623144448393	4.40208348004689	4.34789571182659	4.61540590197337	4.41774605084883	5.15000737865084	5.09022422638292	4.8714005217406	5.36517093022166	4.63594391440006	4.8532808573279	4.84201296018837	6.03220979661496	6.00860537622071	5.44854035298265	5.04517583971599	5.30181873024602	5.4768073524828	5.87530069696982	0.499598490716061	0.985184127226068	0.00695078235749546	0.6021624561429
ENSG00000060558	-5.187403843303	-2.78526912966812	-2.32147516384199	-2.49338177357631	-2.2545047906374	-2.22667144160628	-1.18223701557785	-1.31408209565494	-3.01787611409933	-1.58279092350765	-2.30219146540639	-2.28457872255892	-4.48879653246142	-2.85894281857768	-3.33844038153753	-1.6795914089956	-0.678585344135086	-3.18117731687551	-0.58064579110433	-2.68414274404772	-3.17775205985777	8.43966267299224	8.09953178520979	9.22962173269869	-3.62963455168325	-3.5487705424876	5.81235251342939	6.85323320201448	0.961105583985698	0.954459449327539	0.0372433659927246	0.786914504957742
ENSG00000060642	1.49492334291422	1.00049180617679	1.26789770361305	1.87447007795049	0.868238288255171	1.33947242760723	1.59251123614039	2.09509455666087	1.89682095979961	2.31727624982523	1.72416743691442	2.30065016518015	1.32828471170649	1.59723918365157	1.81121025278757	1.61893935141245	-0.166189306157453	2.06048310748868	1.01374134341732	1.51187025860665	2.07356793070563	2.12920273969661	2.08450661135297	1.66926491394308	2.66403458071031	2.4752957423034	2.3963339257409	1.60409959983027	0.0849466221005275	0.19209428841497	0.0074515276408849	0.0235821332753706
ENSG00000060656	3.98106719946488	3.73726459768257	4.311922119141	4.24947084439733	4.31172206409112	4.42251626456223	4.48564095518396	4.08153995900333	3.8030739795015	4.4302281835885	4.45522865599885	4.34366570911406	3.93854394782951	3.90420007251398	1.55715001658537	0.787376618895139	2.16315220264793	0.412182591781169	-0.109872700523324	1.10666566788825	2.4332312491262	-1.85465034190809	-1.06404047055644	-1.83582569032815	3.83591547046589	3.98587197864689	-3.19376202212606	-2.53270303435123	0.999837786518436	0.674932757950772	0.592263009180924	7.63271208607564e-07
ENSG00000060688	5.50553709673338	5.56109655734638	5.43520965394093	5.57292489582685	5.34744192058047	5.39251859755494	5.25063676945943	5.83651724928082	5.86570138338714	5.66529161812368	5.86037793762607	5.8085878526124	5.91635007373376	5.91625348010846	4.21721860312203	4.15986255342008	4.88555428863084	4.46799753746232	3.69335446493755	4.13056539034064	4.08358999054411	4.90634218196886	4.87589357196653	5.10215114070769	4.23396883599387	4.32115743731404	5.9385201818151	5.88996716047462	0.0505472152252344	0.239506894559151	0.014341319052756	0.935478646872208
ENSG00000060718	0.492608100110046	1.25311404230103	1.75206456494143	1.07941375599977	1.32462046633018	1.50066358404266	1.27373274306201	1.95512016676208	2.23443032709323	2.69704850691601	2.84745272338625	2.40571477140179	4.58297181886736	1.02784076482959	3.44339890271258	6.37237074941765	1.54791912056832	2.11388500881065	6.66200310294766	8.43928921697219	-0.364748182944075	-6.63085934369263	-6.08839047113214	-5.66552730979328	4.44096877316879	1.0312356561476	-2.85390963558938	-3.66055590445646	0.459870375382274	0.654835074688831	0.0366374146497616	0.618435153677384
ENSG00000060749	4.87647608254101	4.13375407314663	4.18343567040978	3.6492905603319	4.15574025202063	3.89925006549546	4.18506643991734	4.35448721127168	4.02437857658964	4.21489376736369	4.59459060559682	4.97488288317722	4.82537620697899	4.93754231645515	3.19621572650781	2.94681698318943	3.08239799463349	3.0467641303789	3.33876466242776	3.38388984344067	2.90759117352753	3.24165128578536	3.07035640602918	2.54119035574157	3.50785590882302	3.29380426775798	2.54043115299219	2.98516247353105	0.0303169168851207	0.0657007117731382	0.988311678578239	0.555523990500736
ENSG00000060762	2.1754136892785	2.032573339791	2.36256749229336	1.92110350738403	2.31310186628	2.50547320488455	2.15739658363727	2.99279191914335	2.76966406796804	2.69545769564458	2.63548665223555	2.11779989701306	3.21462038765704	2.87098510245938	2.66251703338291	2.64490506704101	3.37344970422285	3.79857120755418	4.37326757111413	3.4449443841539	3.70889428803451	5.20878880550117	4.60086309742418	4.56026028512313	4.11423213858628	4.15231191544383	5.17605458501967	4.84765760490839	0.270987370944672	0.873946958537049	5.76924489400328e-05	0.0857708074638276
ENSG00000060971	2.50188198839335	2.33049030945467	2.77300571102261	2.41690504221123	2.16895098274502	2.5727907601835	2.53075388261418	2.42396099986165	2.64093757925524	2.56564548712664	2.39928326815325	1.999076044638	2.51625929401676	2.39717238277958	3.79843361846401	3.81478669451818	3.75113638588519	3.8184606921651	3.27446400445262	3.90197257765273	4.11662469512878	3.60950070383859	3.43473471799341	3.72794374073312	3.20173301183378	3.69107462670522	3.60994201580377	3.96454555205652	0.527257104722936	0.373513562401505	0.0907296452169764	0.183287493071398
ENSG00000060982	6.06456819299972	5.98075182145946	5.9991939848236	5.81339059463207	6.05858656256174	5.76542535955335	5.75560022822465	5.75805729192886	5.56893741268486	5.6869048749209	6.45811962001454	6.30368120724042	6.64162227180835	6.0308139880231	4.8383516806332	4.27980153453676	5.09057407557684	5.51028346832488	3.35211000945427	4.105072280613	5.55441091077682	3.53777278330757	3.88139761913777	5.08157126290973	4.02355344602009	3.65185379984219	3.56041269145936	1.84665970516521	0.624424133477543	0.566036508653305	0.0325742361538232	0.318727349734841
ENSG00000061273	5.26257801268956	5.43116911098035	5.12598279747117	5.29964486396207	5.24512309892512	5.47528162066994	5.11217956714945	5.32032826678818	5.28225703216102	5.7754865460016	5.22117759265909	5.10224010217173	5.44346861268184	5.04140456739377	5.21820568516123	5.40050668385127	5.0917741166585	5.72883303165378	5.3650827688746	5.14054924537723	5.59540230649965	2.34452479498197	2.73532332739785	4.33520426555568	5.41095488226458	5.81338800604331	3.43838312283478	3.06668061169957	0.967425473235268	0.823737321032774	0.000139729198954795	0.582452609533759
ENSG00000061337	1.60511229234924	0.0527326705588633	0.333345177020097	0.145083933486918	0.789228312811409	-0.924376254578636	0.0811122473627475	0.257924173324026	-0.0375322758075681	-0.551652186577084	0.48434560839441	1.25568250381658	1.60900351671252	1.09620334161936	1.49978209920829	1.9671337579962	3.8652328008122	1.0530235805937	2.82251923534525	1.93974317444734	2.04247666463384	-0.926904115611992	-4.50227471299137	-3.41031903035272	1.47135829662469	0.544969452940273	1.54894785767697	-3.22043189962751	0.660572655508187	0.703483905518188	0.000452979269306462	0.411182214668343
ENSG00000061656	-0.552829153335595	0.42628486075368	1.87748192572939	1.19848405710633	0.160944258975871	1.96990441432396	2.06269484265572	-0.379209084321797	0.0392063377065732	0.344361464196115	-0.259742957182256	-0.138204261973695	-1.67746130419852	-0.694153420720838	-1.91778683953379	-0.890715037948457	-3.15874097191282	-0.104020901282398	0.067590699111659	-0.520895413770501	-0.33331701218024	3.93739497618325	4.14647859915404	4.10651745432529	0.392256804991705	0.564712503209359	0.213032388822868	1.64257141560806	0.325895300226874	0.65875955444106	0.0497797406509694	0.618435153677384
ENSG00000061676	5.67582982091828	5.57360199097815	5.47149363954855	5.34691380113857	5.49231652842447	5.32203045280169	5.41053852006469	6.04080719658199	5.9799084373463	6.09662867610933	6.16266556787135	6.27028806464097	6.02123671116585	6.04378768985096	6.62664900164816	6.45733589654909	6.33705089388603	6.19335013501935	6.71180774946317	6.65767063730999	6.41267196716166	1.39503066268301	1.94239945982915	2.56290707415714	6.47773459168367	6.2152376152746	2.56048880834868	2.12778050625326	0.000107538664779582	0.00245875076342983	7.92561562346028e-14	0.631958710737142
ENSG00000061918	1.24392891312294	2.0395177699079	1.23071801775544	0.540010319577574	0.826868798349663	0.634232731533759	0.892892547014757	0.635714092282636	0.293259392556243	0.821037581460593	0.300200666983069	0.685340705900648	-0.97687650839382	0.294057145365231	-1.34917780903428	-0.547484108645796	-1.30770340911944	-2.30843380076285	-1.27205987897603	-2.34771928514793	-3.26910846544562	3.82144067748083	3.33480250607679	4.15651102711656	1.47845426043639	2.2790059768371	3.09692280246146	4.91933692834621	0.251063791429425	0.650534596512235	3.55200616280794e-07	0.00059630438569968
ENSG00000061936	3.84527093720616	4.07852305306387	4.26565828952039	4.1524023159004	4.20547699952538	4.349229769476	4.15933696586163	4.55300406746975	4.64057425892907	4.67661187097489	4.32313409813509	4.47479759207206	3.89675648472265	4.28265202364799	3.67404693276007	3.82482204033259	3.82592186909851	3.82501465290517	3.41209026195011	4.02859114829074	3.82954069272704	4.0941882507515	4.09044018753361	3.91995089842895	3.82249808657959	4.15378253486884	3.84904555445841	4.08888272123271	0.100434626411496	0.340797558553681	0.145554398097078	0.488602472094472
ENSG00000061938	2.60776476524075	2.24884595293714	2.18841482007725	2.05471654973807	2.11352802671564	2.30823519694303	2.14396714337892	3.26676696375561	3.28524008739628	3.87830797493652	3.71783933444878	3.42150926973847	3.37846339051925	3.4748762466191	3.18045218572123	3.5509665660357	2.57683330838188	3.77306076324134	4.26985049146439	3.92313091635749	3.22269592240575	4.33054206534169	4.08517494387005	3.60441661594635	3.49108657207484	3.39926327909644	4.1291941249624	4.5037785975583	0.000110059514866122	0.00274588018293541	0.310217988714356	0.882929712758331
ENSG00000061987	1.73226821519908	1.66991997355355	1.35237881395869	1.06002098316814	1.24690382978136	1.15892506048912	1.29725442888594	1.87798515567704	1.96161482155869	2.01709118396347	2.23501446979618	2.62190701564945	2.32902240542679	2.43072780265245	3.25770131393262	3.08536020866433	2.75175542364104	2.90518608281107	3.24581703286882	3.24931137113004	3.07705430572929	3.64754958961803	3.44197720379892	3.22641511930334	3.73933465238507	3.6417273608426	3.25022390941595	3.16116289586739	1.40827368841961e-05	0.000235909099138915	0.00237372844184946	0.0101670170183544
ENSG00000062038	7.01789413215727	7.24918492869827	7.24995175367341	7.27755585949727	7.21993881477442	7.34565544190034	7.11607735461068	6.63639946770392	6.50672715239442	6.37732462798299	6.65271139362415	6.2617061942593	6.53577414136178	6.20080982228552	2.7923047693985	2.57341663426478	3.974311154166	3.71274358800351	6.43796408330649	4.82341192185181	2.91177663708741	-3.94354475637195	-4.38999915319789	-5.56863503370063	-6.82538279580821	-6.69353518680194	-5.47594847341967	-7.05638764678926	0.0473928650972133	0.236386243174111	2.88216949561828e-07	0.000713167548829842
ENSG00000062194	4.83254593491953	4.91262776062713	5.10492608883498	5.06730148717637	5.19975501901994	5.16692283892472	5.20926987664624	5.36962257456314	5.40296176592309	5.51233998335613	5.14535279247202	5.32847166326387	4.65413017188096	4.93282313552677	4.12681830281635	4.0557586921379	4.14513889123743	4.05326819503579	3.86166344844244	3.96379900827076	4.41121893153255	5.21341475463138	5.19685366973164	5.43912096024463	4.21581014471134	4.15122953590214	4.64930101186695	4.6479279935509	0.496044764427776	0.635979333165219	0.0042705285055282	0.812886309352965
ENSG00000062282	1.86656595863107	1.6085817000106	2.08126655628436	2.01596802220441	2.22721587591512	2.09700299500085	2.48016131022628	-0.397331454547184	-0.286131002496379	0.361183068709311	-0.225945897297345	-0.145157941201262	-1.10485831614922	-0.724757474683983	0.732706285257129	-0.207715489748509	-0.505981336380453	-0.706049319449358	-4.35549785895916	-2.09038100937842	1.74592158698509	2.86153267244728	2.59945594950046	3.25918384215788	-2.04221170460085	-0.971526177866047	2.689566872857	2.1241286933055	0.00032553985389479	0.0363381838459224	0.0578380780767486	0.726173973975253
ENSG00000062370	1.23196614219293	0.995896771493556	1.01418826117015	0.288300428295807	0.697042913647391	0.176185660036419	0.644350701068943	-0.197066774308442	-0.0987598270508212	-0.191301392712578	0.574740855252666	0.746838519835678	0.669145205915597	0.914836688057402	1.57465826977691	1.39921315647731	1.88422898507664	0.955257473738551	1.57433475776887	1.0687052243681	1.16077964403971	-2.80387643231255	-2.7852994148589	-0.645273678894449	1.63317802889076	1.6433653699888	-1.20395945796393	-0.627169774668265	0.496044764427776	0.960525892457521	0.000126823253919186	0.594560757538305
ENSG00000062485	5.01709474549034	5.15174556619809	5.15703865953698	5.07975426409317	4.99157772428063	4.83912504250189	4.95942713106399	4.92313809289223	4.90000630619391	4.56497909439616	5.16412880487839	5.10525457215518	4.98465700496572	5.1507817372022	4.70458129720617	4.54918394766183	4.53786437289935	4.86787407309584	4.65029290869068	4.80122293641929	4.31813775498772	5.19889299470767	5.30249257121261	5.69879577911662	4.88701861422127	4.79656699227003	5.73242747082947	5.58180379886329	0.967541488142502	0.702137013432514	0.000174553431082889	0.416699512012399
ENSG00000062598	3.04230070731614	3.12732453140463	2.94772812426941	3.04171938877786	3.0118009765433	3.40341136950927	2.98197831970164	3.03236050646574	3.25239116304923	3.53772969804964	2.86730755263196	3.17210111035184	3.22009290953512	3.18922206822656	3.63159398757232	3.6667499480718	3.38195307837281	3.53131425890447	4.02818884751918	3.63902086409687	3.89927708789324	3.72126778758685	3.66754740939371	3.86507959980035	3.89230943521964	3.9374200046442	3.70783006575288	3.50784519304586	0.767779987528662	0.861989654048161	0.2952801072497	0.298238144646908
[truncated: 12,454 more rows]
