# Supplementary material for: A panel of induced pluripotent stem cells from chimpanzees: a resource for comparative functional genomics
Source: eLife journal article supplement (doi:10.7554/elife.07103), 2015-06-23
Supplement: supp [file elife-07103-supp-v1.zip › elife_poa_e07103_Supplementary_File_14.txt]

chr	DMR.start	DMR.end	n.probes	Probes.in.DMR	Probe.gene.position	Probe.type	HGNC.gene	Refseq.gene	DMR.type
1	58712	59454	2	cg20253340,cg21870274	TSS1500,1stExon	_,_	OR4F5,OR4F5	NM_001005484,NM_001005484	hyperM.iPSC
1	884817	885276	2	cg19923810,cg16993975	TSS1500;TSS1500,TSS1500;TSS1500	Island,Island	KLHL17;NOC2L,KLHL17;NOC2L	NM_198317;NM_015658,NM_198317;NM_015658	hyperM.iPSC
1	896226	897481	4	cg22381068,cg22481263,cg07195057,cg26679367	Body;Body,Body;Body,Body;Body,Body;Body	Island,Island,S_Shore,S_Shore	PLEKHN1;PLEKHN1,PLEKHN1;PLEKHN1,PLEKHN1;PLEKHN1,PLEKHN1;PLEKHN1	NM_032129;NM_001160184,NM_032129;NM_001160184,NM_032129;NM_001160184,NM_032129;NM_001160184	hyperM.iPSC
1	901858	901918	2	cg05505459,cg23635910	Body,Body	N_Shore,N_Shore	C1orf170,C1orf170	NR_027693,NR_027693	hyperM.iPSC
1	953462	954369	3	cg02632261,cg25774148,cg17021880	Body,Body,Body	N_Shore,Island,Island	AGRN,AGRN,AGRN	NM_198576,NM_198576,NM_198576	hyperM.iPSC
1	988501	989751	5	cg09123721,cg11405655,cg25523405,cg21139076,cg07549208	_,_	N_Shore,N_Shore,Island,Island,Island	_,_	_,_	hyperM.iPSC
1	991730	991931	3	cg06095202,cg04891761,cg15500259	_,_	N_Shore,N_Shore,N_Shore	_,_	_,_	hyperM.iPSC
1	994963	995261	3	cg08750554,cg26702212,cg24517686	_,_	Island,Island,S_Shore	_,_	_,_	hyperM.iPSC
1	1012763	1012795	2	cg19999567,cg19856606	Body,Body	N_Shore,N_Shore	C1orf159,C1orf159	NM_017891,NM_017891	hyperM.iPSC
1	1042812	1042890	2	cg16679343,cg19626656	TSS1500,TSS1500	S_Shore,S_Shore	C1orf159,C1orf159	NM_017891,NM_017891	hyperM.iPSC
1	1047546	1048521	3	cg27582017,cg08899471,cg23926866	_,_	_,_	_,_	_,_	hyperM.iPSC
1	1051384	1054805	7	cg20619296,cg18329352,cg25973293,cg27582546,cg06798288,cg22512779,cg23622235	_,_	_,_	_,_	_,_	hyperM.iPSC
1	1055950	1057952	5	cg21775619,cg07179016,cg07203151,cg00300303,cg02852398	_,_	_,_	_,_	_,_	hyperM.iPSC
1	1083075	1083803	3	cg23891858,cg20256117,cg07213830	_,_	Island,Island,S_Shore	_,_	_,_	hyperM.iPSC
1	1086580	1088243	9	cg15688253,cg22864340,cg10335452,cg06193359,cg13560058,cg00082285,cg05336956,cg21778193,cg15489799	_,_	N_Shore,N_Shore,N_Shore,N_Shore,N_Shore,N_Shore,N_Shore,Island,Island	_,_	_,_	hyperM.iPSC
1	1089426	1091325	8	cg14166948,cg20185617,cg21475076,cg14476334,cg22109930,cg13449535,cg07123481,cg14144728	_,TSS1500,TSS1500,TSS1500,TSS1500	Island,Island,Island,Island,S_Shore,S_Shore,S_Shore,S_Shore	_,MIR200B,MIR200B,MIR200B,MIR200B	_,NR_029639,NR_029639,NR_029639,NR_029639	hyperM.iPSC
1	1092823	1093175	5	cg13362546,cg21810793,cg25101291,cg16561256,cg26910384	TSS1500;TSS1500,TSS200;TSS1500,TSS200;TSS1500,Body;TSS1500,Body;TSS1500	S_Shelf,S_Shelf,S_Shelf,S_Shelf,S_Shelf	MIR200A;MIR429,MIR200A;MIR429,MIR200A;MIR429,MIR200A;MIR429,MIR200A;MIR429	NR_029834;NR_029957,NR_029834;NR_029957,NR_029834;NR_029957,NR_029834;NR_029957,NR_029834;NR_029957	hyperM.iPSC
1	1098683	1100958	11	cg27631599,cg10056813,cg14709479,cg01961752,cg21288685,cg10143960,cg01511231,cg03278726,cg22047469,cg14793764,cg08933284	TSS1500,TSS1500,TSS1500,TSS1500,TSS200,5'UTR,5'UTR,5'UTR,5'UTR,5'UTR,5'UTR	N_Shore,N_Shore,N_Shore,N_Shore,N_Shore,Island,Island,Island,Island,S_Shore,S_Shore	TTLL10,TTLL10,TTLL10,TTLL10,TTLL10,TTLL10,TTLL10,TTLL10,TTLL10,TTLL10,TTLL10	NM_001130045,NM_001130045,NM_001130045,NM_001130045,NM_001130045,NM_001130045,NM_001130045,NM_001130045,NM_001130045,NM_001130045,NM_001130045	hyperM.iPSC
1	1103487	1105438	7	cg18382926,cg16043700,cg07173112,cg23275914,cg14220262,cg24884961,cg03340606	TSS1500;5'UTR,TSS1500;5'UTR,Body;TSS1500,Body;TSS200,Body;TSS200,5'UTR;Body;1stExon,Body;Body	N_Shore,N_Shore,N_Shore,N_Shore,N_Shore,N_Shore,Island	TTLL10;TTLL10,TTLL10;TTLL10,TTLL10;TTLL10,TTLL10;TTLL10,TTLL10;TTLL10,TTLL10;TTLL10;TTLL10,TTLL10;TTLL10	NM_153254;NM_001130045,NM_153254;NM_001130045,NM_001130045;NM_153254,NM_001130045;NM_153254,NM_001130045;NM_153254,NM_153254;NM_001130045;NM_153254,NM_153254;NM_001130045	hyperM.iPSC
1	1128794	1130527	5	cg18319381,cg19413397,cg12810734,cg08090128,cg16046810	3'UTR;3'UTR;3'UTR,3'UTR;Body;3'UTR,Body;Body;Body,Body;Body;Body,Body;Body;Body	S_Shore,S_Shore,N_Shelf,N_Shore,N_Shore	TNFRSF18;TNFRSF18;TNFRSF18,TNFRSF18;TNFRSF18;TNFRSF18,TNFRSF18;TNFRSF18;TNFRSF18,TNFRSF18;TNFRSF18;TNFRSF18,TNFRSF18;TNFRSF18;TNFRSF18	NM_148901;NM_004195;NM_148902,NM_004195;NM_148901;NM_148902,NM_148902;NM_004195;NM_148901,NM_148902;NM_004195;NM_148901,NM_148902;NM_004195;NM_148901	hyperM.iPSC
1	1131653	1134587	10	cg08641866,cg14886269,cg15706223,cg06097659,cg10583942,cg07119157,cg19092396,cg25144135,cg16266669,cg15924570	1stExon;1stExon;1stExon,1stExon;1stExon;1stExon,1stExon;1stExon;1stExon,5'UTR;1stExon;5'UTR;1stExon;1stExon;5'UTR,TSS1500;TSS1500;TSS1500,TSS1500;TSS1500;TSS1500,_	Island,Island,Island,Island,S_Shore,S_Shore,N_Shore,N_Shore,N_Shore,N_Shore	TNFRSF18;TNFRSF18;TNFRSF18,TNFRSF18;TNFRSF18;TNFRSF18,TNFRSF18;TNFRSF18;TNFRSF18,TNFRSF18;TNFRSF18;TNFRSF18;TNFRSF18;TNFRSF18;TNFRSF18,TNFRSF18;TNFRSF18;TNFRSF18,TNFRSF18;TNFRSF18;TNFRSF18,_	NM_148901;NM_004195;NM_148902,NM_148901;NM_004195;NM_148902,NM_148901;NM_004195;NM_148902,NM_148901;NM_148901;NM_004195;NM_004195;NM_148902;NM_148902,NM_148902;NM_148901;NM_004195,NM_148902;NM_148901;NM_004195,_	hyperM.iPSC
1	1138836	1139074	4	cg12759096,cg22335801,cg14661234,cg23394673	Body,Body,Body,Body	N_Shore,Island,Island,Island	TNFRSF4,TNFRSF4,TNFRSF4,TNFRSF4	NM_003327,NM_003327,NM_003327,NM_003327	hyperM.iPSC
1	1167902	1167908	2	cg00211609,cg10378904	Body,Body	Island,Island	FAM132A,FAM132A	NM_001014980,NM_001014980	hyperM.iPSC
1	1171632	1172521	6	cg19236794,cg04719903,cg25594899,cg14089984,cg06443533,cg26314055	Body,1stExon,TSS200,TSS1500,TSS1500,TSS1500	Island,Island,Island,Island,Island,S_Shore	FAM132A,FAM132A,FAM132A,FAM132A,FAM132A,FAM132A	NM_001014980,NM_001014980,NM_001014980,NM_001014980,NM_001014980,NM_001014980	hyperM.iPSC
1	1185432	1186588	3	cg14661139,cg17177602,cg08884932	Body;Body;Body;Body;Body,Body;Body;Body;Body;Body,Body;Body;Body;Body;Body	_,_	UBE2J2;UBE2J2;LOC100128842;UBE2J2;UBE2J2,UBE2J2;UBE2J2;LOC100128842;UBE2J2;UBE2J2,UBE2J2;UBE2J2;LOC100128842;UBE2J2;UBE2J2	NM_194457;NM_194315;NR_027361;NM_194458;NM_058167,NM_194457;NM_194315;NR_027361;NM_194458;NM_058167,NM_194457;NM_194315;NR_027361;NM_194458;NM_058167	hyperM.iPSC
1	1197652	1198289	2	cg23891364,cg21864845	5'UTR;5'UTR;5'UTR;5'UTR,5'UTR;5'UTR;5'UTR;5'UTR	N_Shore,N_Shore	UBE2J2;UBE2J2;UBE2J2;UBE2J2,UBE2J2;UBE2J2;UBE2J2;UBE2J2	NM_194315;NM_194457;NM_058167;NM_194458,NM_194315;NM_194457;NM_058167;NM_194458	hyperM.iPSC
1	1206304	1207527	7	cg13587552,cg11229611,cg06909630,cg12645236,cg00825734,cg22421766,cg24576260	TSS1500;TSS1500,TSS1500;TSS1500,TSS1500;TSS1500,TSS1500;TSS1500,5'UTR;TSS200;1stExon,5'UTR;1stExon;1stExon,5'UTR;1stExon;1stExon	_,_	SCNN1D;SCNN1D,SCNN1D;SCNN1D,SCNN1D;SCNN1D,SCNN1D;SCNN1D,SCNN1D;SCNN1D;SCNN1D,SCNN1D;SCNN1D;SCNN1D,SCNN1D;SCNN1D;SCNN1D	NM_001130413;NM_002978,NM_001130413;NM_002978,NM_001130413;NM_002978,NM_001130413;NM_002978,NM_001130413;NM_002978;NM_001130413,NM_002978;NM_001130413;NM_002978,NM_002978;NM_001130413;NM_002978	hyperM.iPSC
1	1212047	1213305	4	cg10119342,cg16995668,cg09870910,cg25151559	Body;Body,Body;Body,Body;Body,Body;Body	_,_	SCNN1D;SCNN1D,SCNN1D;SCNN1D,SCNN1D;SCNN1D,SCNN1D;SCNN1D	NM_001130413;NM_002978,NM_001130413;NM_002978,NM_001130413;NM_002978,NM_001130413;NM_002978	hyperM.iPSC
1	1216639	1218152	5	cg27179810,cg15683497,cg06358191,cg20978193,cg15994839	Body;Body,Body;Body,3'UTR;3'UTR,3'UTR;3'UTR,3'UTR	N_Shelf,N_Shore,N_Shore,N_Shore,N_Shore	SCNN1D;SCNN1D,SCNN1D;SCNN1D,SCNN1D;SCNN1D,SCNN1D;SCNN1D,ACAP3	NM_001130413;NM_002978,NM_001130413;NM_002978,NM_001130413;NM_002978,NM_001130413;NM_002978,NM_030649	hyperM.iPSC
1	1219214	1219452	2	cg03003335,cg01515136	Body,Body	Island,Island	ACAP3,ACAP3	NM_030649,NM_030649	hyperM.iPSC
1	1228660	1229862	3	cg27185793,cg09556527,cg07181952	Body,Body,Body	N_Shelf,N_Shelf,N_Shelf	ACAP3,ACAP3,ACAP3	NM_030649,NM_030649,NM_030649	hyperM.iPSC
1	1232593	1232595	2	cg26333156,cg00262415	TSS1500;Body,TSS1500;Body	Island,Island	PUSL1;ACAP3,PUSL1;ACAP3	NM_153339;NM_030649,NM_153339;NM_030649	hyperM.iPSC
1	1256041	1259262	14	cg20705390,cg04981007,cg16430279,cg24252805,cg07346648,cg08037114,cg07624812,cg04910752,cg03402404,cg18386618,cg06395167,cg11808871,cg14911892,cg26814650	TSS1500,TSS1500,TSS1500,TSS200,TSS200,TSS200,1stExon,Body,Body,Body,Body,Body,Body,Body	N_Shore,N_Shore,N_Shore,N_Shore,N_Shore,N_Shore,N_Shore,Island,Island,Island,Island,Island,S_Shore,S_Shore	TAS1R3,TAS1R3,TAS1R3,TAS1R3,TAS1R3,TAS1R3,TAS1R3,TAS1R3,TAS1R3,TAS1R3,TAS1R3,TAS1R3,TAS1R3,TAS1R3	NM_152228,NM_152228,NM_152228,NM_152228,NM_152228,NM_152228,NM_152228,NM_152228,NM_152228,NM_152228,NM_152228,NM_152228,NM_152228,NM_152228	hyperM.iPSC
1	1278449	1278789	2	cg11414742,cg15472728	3'UTR,3'UTR	N_Shore,N_Shore	MXRA8,MXRA8	NM_032348,NM_032348	hypoM.iPSC
1	1280417	1280575	3	cg25063151,cg19436320,cg00040588	Body,Body,Body	Island,Island,Island	MXRA8,MXRA8,MXRA8	NM_032348,NM_032348,NM_032348	hypoM.iPSC
1	1283731	1284003	4	cg27399052,cg12478066,cg23036947,cg17132079	1stExon,TSS200,TSS200,TSS1500	S_Shelf,S_Shelf,S_Shelf,S_Shelf	MXRA8,MXRA8,MXRA8,MXRA8	NM_032348,NM_032348,NM_032348,NM_032348	hyperM.iPSC
1	1286534	1287439	6	cg20426768,cg24153574,cg21165029,cg03400623,cg22109675,cg15492552	_,_	_,_	_,_	_,_	hyperM.iPSC
1	1299194	1299504	3	cg25685675,cg14094639,cg06203720	Body;Body;Body,Body;Body;Body,Body;Body;Body	Island,Island,Island	AURKAIP1;AURKAIP1;AURKAIP1,AURKAIP1;AURKAIP1;AURKAIP1,AURKAIP1;AURKAIP1;AURKAIP1	NM_001127229;NM_017900;NM_001127230,NM_001127229;NM_017900;NM_001127230,NM_001127229;NM_017900;NM_001127230	hyperM.iPSC
1	1323641	1323899	2	cg24837149,cg16278124	Body;Body;Body;TSS1500;Body,Body;Body;Body;TSS1500;Body	N_Shore,N_Shore	CCNL2;CCNL2;CCNL2;LOC148413;CCNL2,CCNL2;CCNL2;CCNL2;LOC148413;CCNL2	NM_030937;NM_001144868;NM_001144867;NR_015434;NM_001039577,NM_030937;NM_001144868;NM_001144867;NR_015434;NM_001039577	hyperM.iPSC
1	1359329	1360585	3	cg21837069,cg06444575,cg08589721	TSS1500;TSS1500,TSS1500;TSS1500,TSS200;TSS200	N_Shore,N_Shore,N_Shore	VWA1;VWA1,VWA1;VWA1,VWA1;VWA1	NM_199121;NM_022834,NM_199121;NM_022834,NM_199121;NM_022834	hyperM.iPSC
1	1359797	1359811	2	cg14667273,cg27391934	TSS1500;TSS1500,TSS1500;TSS1500	N_Shore,N_Shore	VWA1;VWA1,VWA1;VWA1	NM_199121;NM_022834,NM_199121;NM_022834	hypoM.iPSC
1	1362540	1362907	2	cg08161163,cg26798702	Body;Body,Body;3'UTR	N_Shore,N_Shore	VWA1;VWA1,VWA1;VWA1	NM_022834;NM_199121,NM_022834;NM_199121	hyperM.iPSC
1	1364464	1365419	4	cg09860601,cg19639479,cg03116557,cg13570957	Body;3'UTR,Body;3'UTR,3'UTR;3'UTR,3'UTR;3'UTR	Island,Island,Island,Island	VWA1;VWA1,VWA1;VWA1,VWA1;VWA1,VWA1;VWA1	NM_022834;NM_199121,NM_022834;NM_199121,NM_199121;NM_022834,NM_199121;NM_022834	hyperM.iPSC
1	1366603	1367388	2	cg08426733,cg08270205	3'UTR;3'UTR,3'UTR;3'UTR	S_Shore,S_Shore	VWA1;VWA1,VWA1;VWA1	NM_199121;NM_022834,NM_199121;NM_022834	hyperM.iPSC
1	1385808	1386032	5	cg26226110,cg07280242,cg13798621,cg13487474,cg23016632	Body,Body,Body,Body,Body	N_Shore,Island,Island,Island,Island	ATAD3C,ATAD3C,ATAD3C,ATAD3C,ATAD3C	NM_001039211,NM_001039211,NM_001039211,NM_001039211,NM_001039211	hyperM.iPSC
1	1387387	1388211	4	cg17282836,cg10522845,cg24687970,cg04981940	Body,Body,Body,Body	S_Shore,S_Shore,S_Shore,S_Shelf	ATAD3C,ATAD3C,ATAD3C,ATAD3C	NM_001039211,NM_001039211,NM_001039211,NM_001039211	hyperM.iPSC
1	1393720	1393936	2	cg17821649,cg00391668	Body,3'UTR	N_Shelf,N_Shelf	ATAD3C,ATAD3C	NM_001039211,NM_001039211	hyperM.iPSC
1	1461942	1462009	2	cg15844005,cg27301475	Body,Body	N_Shore,N_Shore	C1orf70,C1orf70	NM_001114748,NM_001114748	hyperM.iPSC
1	1466888	1468033	3	cg11811409,cg01802295,cg11964810	TSS1500,3'UTR;TSS1500,Body	S_Shore,S_Shore,S_Shore	C1orf70,SSU72;C1orf70,SSU72	NM_001114748,NM_014188;NM_001114748,NM_014188	hyperM.iPSC
1	1476322	1477401	4	cg12734710,cg01058717,cg16305094,cg18312113	Body,Body,Body,Body	N_Shelf,N_Shelf,N_Shelf,N_Shore	SSU72,SSU72,SSU72,SSU72	NM_014188,NM_014188,NM_014188,NM_014188	hyperM.iPSC
1	1480539	1480769	3	cg16277776,cg07211239,cg10987926	Body,Body,Body	S_Shore,S_Shore,S_Shore	SSU72,SSU72,SSU72	NM_014188,NM_014188,NM_014188	hyperM.iPSC
1	1524255	1524377	2	cg07479014,cg09126090	_,_	Island,Island	_,_	_,_	hyperM.iPSC
1	1539478	1539681	4	cg07147033,cg13897348,cg19246761,cg01229567	TSS1500;TSS1500;TSS1500;TSS1500;TSS1500,TSS1500;TSS1500;TSS1500;TSS1500;TSS1500,TSS1500;TSS1500;TSS1500;TSS1500;TSS1500;TSS1500,TSS1500;TSS1500;TSS1500;TSS1500;TSS1500;TSS1500	N_Shore,N_Shore,N_Shore,N_Shore	MIB2;MIB2;MIB2;MIB2;MIB2,MIB2;MIB2;MIB2;MIB2;MIB2,MIB2;MIB2;MIB2;MIB2;MIB2;MIB2,MIB2;MIB2;MIB2;MIB2;MIB2;MIB2	NM_001170687;NM_001170688;NM_080875;NR_033183;NM_001170686,NM_001170687;NM_001170688;NM_080875;NR_033183;NM_001170686,NM_001170689;NM_001170687;NM_001170688;NM_080875;NR_033183;NM_001170686,NM_001170689;NM_001170687;NM_001170688;NM_080875;NR_033183;NM_001170686	hyperM.iPSC
1	1547960	1549018	3	cg19165249,cg01589461,cg03975652	Body;Body;Body;5'UTR;Body;Body,Body;Body;Body;5'UTR;Body;Body,Body;Body;Body;Body;Body;Body	N_Shore,Island,Island	MIB2;MIB2;MIB2;MIB2;MIB2;MIB2,MIB2;MIB2;MIB2;MIB2;MIB2;MIB2,MIB2;MIB2;MIB2;MIB2;MIB2;MIB2	NM_001170687;NM_001170688;NM_080875;NM_001170689;NM_001170686;NR_033183,NM_001170687;NM_001170688;NM_080875;NM_001170689;NM_001170686;NR_033183,NM_001170687;NM_001170688;NM_080875;NM_001170689;NM_001170686;NR_033183	hyperM.iPSC
1	1552634	1552864	2	cg04854189,cg06912282	Body;Body;Body;Body;Body;Body,Body;Body;Body;Body;Body;Body	N_Shore,N_Shore	MIB2;MIB2;MIB2;MIB2;MIB2;MIB2,MIB2;MIB2;MIB2;MIB2;MIB2;MIB2	NM_001170687;NM_001170688;NM_080875;NM_001170689;NM_001170686;NR_033183,NM_001170687;NM_001170688;NM_080875;NM_001170689;NM_001170686;NR_033183	hyperM.iPSC
1	1599251	1599835	2	cg12655137,cg20429981	Body;Body;Body;Body;Body;5'UTR;5'UTR,Body;Body;Body;Body;Body;5'UTR;5'UTR	S_Shore,S_Shore	CDK11B;CDK11B;CDK11B;CDK11B;CDK11B;LOC728661;CDK11B,CDK11B;CDK11B;CDK11B;CDK11B;CDK11B;LOC728661;CDK11B	NM_033493;NM_033489;NM_033486;NM_033488;NM_033492;NM_001110781;NM_033487,NM_033493;NM_033489;NM_033486;NM_033488;NM_033492;NM_001110781;NM_033487	hyperM.iPSC
1	1708669	1708712	2	cg26568075,cg12076692	Body,Body	_,_	GNB1,GNB1	NM_002074,NM_002074	hyperM.iPSC
1	1815721	1816087	2	cg07380540,cg16652392	_,_	S_Shelf,S_Shelf	_,_	_,_	hyperM.iPSC
1	1833800	1836451	8	cg22850508,cg15102821,cg01755342,cg06443644,cg11549166,cg22364929,cg05132306,cg17434257	_,TSS1500,TSS1500,TSS1500,TSS200,TSS200,1stExon;5'UTR,1stExon;5'UTR	S_Shelf,N_Shelf,N_Shelf,N_Shelf,N_Shelf	_,CALML6,CALML6,CALML6,CALML6,CALML6,CALML6;CALML6,CALML6;CALML6	_,NM_138705,NM_138705,NM_138705,NM_138705,NM_138705,NM_138705;NM_138705,NM_138705;NM_138705	hyperM.iPSC
1	1838509	1838933	2	cg17592667,cg03442254	3'UTR,3'UTR	N_Shore,N_Shore	CALML6,TMEM52	NM_138705,NM_178545	hyperM.iPSC
1	1841232	1842076	5	cg05355142,cg04758387,cg10219957,cg01428437,cg04886783	TSS1500,TSS1500,TSS1500,TSS1500,TSS1500	Island,Island,S_Shore,S_Shore,S_Shore	TMEM52,TMEM52,TMEM52,TMEM52,TMEM52	NM_178545,NM_178545,NM_178545,NM_178545,NM_178545	hyperM.iPSC
1	1844333	1845933	3	cg03580107,cg07924154,cg19356311	_,_	S_Shelf,S_Shelf,N_Shelf	_,_	_,_	hyperM.iPSC
1	1847897	1847966	2	cg18231054,cg06092084	_,_	N_Shore,N_Shore	_,_	_,_	hyperM.iPSC
1	1860355	1861893	5	cg18383977,cg08639799,cg14559508,cg24315049,cg02367828	_,_	_,N_Shelf,N_Shelf,N_Shelf,N_Shelf	_,_	_,_	hyperM.iPSC
1	1863359	1865640	5	cg15833286,cg16142957,cg07719258,cg15028578,cg17747265	_,_	N_Shore,N_Shore,N_Shore,Island,Island	_,_	_,_	hyperM.iPSC
1	1868255	1868425	2	cg08730434,cg26357403	_,_	S_Shelf,S_Shelf	_,_	_,_	hyperM.iPSC
1	1878142	1879784	3	cg14165029,cg10433463,cg03950120	Body,Body,Body	S_Shore,S_Shelf,S_Shelf	KIAA1751,KIAA1751,KIAA1751	NM_001080484,NM_001080484,NM_001080484	hyperM.iPSC
1	1894940	1897518	6	cg06835814,cg07105421,cg26430560,cg14598619,cg00574213,cg19694957	Body,Body,Body,Body,Body,Body	_,N_Shelf,N_Shelf,N_Shelf	KIAA1751,KIAA1751,KIAA1751,KIAA1751,KIAA1751,KIAA1751	NM_001080484,NM_001080484,NM_001080484,NM_001080484,NM_001080484,NM_001080484	hyperM.iPSC
1	1903984	1904567	3	cg01799930,cg18270426,cg12701697	Body,Body,Body	S_Shore,S_Shore,S_Shore	KIAA1751,KIAA1751,KIAA1751	NM_001080484,NM_001080484,NM_001080484	hyperM.iPSC
1	1906204	1906754	2	cg26801936,cg15622118	Body,Body	S_Shelf,S_Shelf	KIAA1751,KIAA1751	NM_001080484,NM_001080484	hyperM.iPSC
1	1935819	1936548	4	cg06980013,cg09021225,cg00546307,cg13103143	_,_	_,N_Shelf	_,_	_,_	hyperM.iPSC
1	1939214	1939896	2	cg26609236,cg17854471	TSS1500,TSS1500	N_Shore,N_Shore	GABRD,GABRD	NM_000815,NM_000815	hyperM.iPSC
1	1944984	1945622	2	cg19868751,cg13788313	Body,Body	N_Shore,N_Shore	GABRD,GABRD	NM_000815,NM_000815	hyperM.iPSC
1	1946933	1947665	4	cg15825127,cg24105782,cg10837110,cg05654059	Body,Body,Body,Body	Island,Island,N_Shore,N_Shore	GABRD,GABRD,GABRD,GABRD	NM_000815,NM_000815,NM_000815,NM_000815	hyperM.iPSC
1	1949302	1950971	8	cg00400948,cg19091116,cg04781796,cg21422740,cg25154424,cg11240722,cg09769218,cg24364910	Body,Body,Body,Body,Body,Body,Body,Body	Island,Island,Island,N_Shore,N_Shore,Island,Island,Island	GABRD,GABRD,GABRD,GABRD,GABRD,GABRD,GABRD,GABRD	NM_000815,NM_000815,NM_000815,NM_000815,NM_000815,NM_000815,NM_000815,NM_000815	hyperM.iPSC
1	1964521	1964686	3	cg04843461,cg16703312,cg12658400	_,_	N_Shore,Island,Island	_,_	_,_	hyperM.iPSC
1	1978541	1978627	2	cg26059839,cg14656575	Body,Body	N_Shelf,N_Shelf	PRKCZ,PRKCZ	NM_002744,NM_002744	hyperM.iPSC
1	1980846	1983370	9	cg15502607,cg00653281,cg04871460,cg27264322,cg19619416,cg07570618,cg05463656,cg00328210,cg15703790	Body,Body,Body,Body,Body,Body,Body,Body,Body	Island,Island,S_Shore,S_Shore,S_Shore,S_Shore,S_Shore,S_Shore,S_Shelf	PRKCZ,PRKCZ,PRKCZ,PRKCZ,PRKCZ,PRKCZ,PRKCZ,PRKCZ,PRKCZ	NM_002744,NM_002744,NM_002744,NM_002744,NM_002744,NM_002744,NM_002744,NM_002744,NM_002744	hyperM.iPSC
1	1992189	1995892	19	cg11699150,cg08108679,cg16269144,cg04314111,cg22332339,cg11227141,cg08439149,cg13077150,cg00359465,cg04023573,cg03959306,cg04520340,cg16653138,cg13387826,cg19803229,cg14418633,cg03001333,cg13591369,cg27587033	Body,Body,Body,Body,TSS1500;Body,TSS1500;Body,TSS1500;Body,TSS1500;Body,TSS1500;Body,TSS1500;Body,TSS200;Body,1stExon;Body;5'UTR,1stExon;Body;5'UTR,1stExon;Body;5'UTR,1stExon;Body;5'UTR,Body;5'UTR,Body;5'UTR,Body;5'UTR,Body;5'UTR	N_Shelf,N_Shore,N_Shore,N_Shore,N_Shore,N_Shore,N_Shore,N_Shore,N_Shore,N_Shore,N_Shore,N_Shore,Island,Island,Island,Island,Island,Island,S_Shore	PRKCZ,PRKCZ,PRKCZ,PRKCZ,PRKCZ;PRKCZ,PRKCZ;PRKCZ,PRKCZ;PRKCZ,PRKCZ;PRKCZ,PRKCZ;PRKCZ,PRKCZ;PRKCZ,PRKCZ;PRKCZ,PRKCZ;PRKCZ;PRKCZ,PRKCZ;PRKCZ;PRKCZ,PRKCZ;PRKCZ;PRKCZ,PRKCZ;PRKCZ;PRKCZ,PRKCZ;PRKCZ,PRKCZ;PRKCZ,PRKCZ;PRKCZ,PRKCZ;PRKCZ	NM_002744,NM_002744,NM_002744,NM_002744,NM_001033581;NM_002744,NM_001033581;NM_002744,NM_001033581;NM_002744,NM_001033581;NM_002744,NM_001033581;NM_002744,NM_001033581;NM_002744,NM_001033581;NM_002744,NM_001033581;NM_002744;NM_001033581,NM_001033581;NM_002744;NM_001033581,NM_001033581;NM_002744;NM_001033581,NM_001033581;NM_002744;NM_001033581,NM_002744;NM_001033581,NM_002744;NM_001033581,NM_00274…	hyperM.iPSC
1	1998225	1998439	3	cg02482150,cg25976434,cg06757383	Body;5'UTR,Body;5'UTR,Body;5'UTR	S_Shelf,S_Shelf,S_Shelf	PRKCZ;PRKCZ,PRKCZ;PRKCZ,PRKCZ;PRKCZ	NM_002744;NM_001033581,NM_002744;NM_001033581,NM_002744;NM_001033581	hyperM.iPSC
1	2005675	2008112	6	cg22868225,cg20153240,cg06821641,cg17495046,cg12601506,cg14204564	Body;5'UTR,Body;5'UTR,Body;5'UTR,Body;5'UTR,Body;5'UTR,Body;5'UTR	_,_	PRKCZ;PRKCZ,PRKCZ;PRKCZ,PRKCZ;PRKCZ,PRKCZ;PRKCZ,PRKCZ;PRKCZ,PRKCZ;PRKCZ	NM_002744;NM_001033581,NM_002744;NM_001033581,NM_002744;NM_001033581,NM_002744;NM_001033581,NM_002744;NM_001033581,NM_002744;NM_001033581	hyperM.iPSC
1	2013118	2013342	2	cg02587648,cg19906777	Body;5'UTR,Body;5'UTR	N_Shore,N_Shore	PRKCZ;PRKCZ,PRKCZ;PRKCZ	NM_002744;NM_001033581,NM_002744;NM_001033581	hyperM.iPSC
1	2014453	2015656	4	cg01164686,cg24138964,cg20269544,cg12764620	Body;5'UTR,Body;5'UTR,Body;5'UTR,Body;5'UTR	N_Shore,Island,Island,Island	PRKCZ;PRKCZ,PRKCZ;PRKCZ,PRKCZ;PRKCZ,PRKCZ;PRKCZ	NM_002744;NM_001033581,NM_002744;NM_001033581,NM_002744;NM_001033581,NM_002744;NM_001033581	hyperM.iPSC
1	2025322	2026503	6	cg23276504,cg12639453,cg16599817,cg06315149,cg17023856,cg08109625	TSS1500;Body;5'UTR,TSS1500;Body;5'UTR,1stExon;5'UTR;Body;5'UTR,5'UTR;Body;5'UTR,5'UTR;Body;5'UTR,5'UTR;Body;5'UTR	N_Shelf,N_Shelf,N_Shelf,N_Shelf,N_Shelf,N_Shore	PRKCZ;PRKCZ;PRKCZ,PRKCZ;PRKCZ;PRKCZ,PRKCZ;PRKCZ;PRKCZ;PRKCZ,PRKCZ;PRKCZ;PRKCZ,PRKCZ;PRKCZ;PRKCZ,PRKCZ;PRKCZ;PRKCZ	NM_001033582;NM_002744;NM_001033581,NM_001033582;NM_002744;NM_001033581,NM_001033582;NM_001033582;NM_002744;NM_001033581,NM_001033582;NM_002744;NM_001033581,NM_001033582;NM_002744;NM_001033581,NM_001033582;NM_002744;NM_001033581	hyperM.iPSC
1	2028237	2031624	6	cg13072890,cg12713909,cg06204101,cg09322616,cg02293396,cg17748900	5'UTR;Body;5'UTR,5'UTR;Body;5'UTR,5'UTR;Body;5'UTR,5'UTR;Body;5'UTR,5'UTR;Body;5'UTR,5'UTR;Body;5'UTR	N_Shore,S_Shore,N_Shore,N_Shore,Island,S_Shore	PRKCZ;PRKCZ;PRKCZ,PRKCZ;PRKCZ;PRKCZ,PRKCZ;PRKCZ;PRKCZ,PRKCZ;PRKCZ;PRKCZ,PRKCZ;PRKCZ;PRKCZ,PRKCZ;PRKCZ;PRKCZ	NM_001033582;NM_002744;NM_001033581,NM_001033582;NM_002744;NM_001033581,NM_001033582;NM_002744;NM_001033581,NM_001033582;NM_002744;NM_001033581,NM_001033582;NM_002744;NM_001033581,NM_001033582;NM_002744;NM_001033581	hyperM.iPSC
1	2033299	2033621	2	cg22342249,cg13918804	5'UTR;Body;5'UTR,5'UTR;Body;5'UTR	N_Shelf,N_Shelf	PRKCZ;PRKCZ;PRKCZ,PRKCZ;PRKCZ;PRKCZ	NM_001033582;NM_002744;NM_001033581,NM_001033582;NM_002744;NM_001033581	hyperM.iPSC
1	2036643	2036724	2	cg09179248,cg17426766	5'UTR;Body;5'UTR,5'UTR;Body;5'UTR	Island,Island	PRKCZ;PRKCZ;PRKCZ,PRKCZ;PRKCZ;PRKCZ	NM_001033582;NM_002744;NM_001033581,NM_001033582;NM_002744;NM_001033581	hyperM.iPSC
1	2047299	2050502	9	cg18803110,cg12718519,cg09261593,cg13480549,cg18188739,cg15481172,cg08106279,cg11796233,cg26335530	5'UTR;Body;5'UTR,5'UTR;Body;5'UTR,5'UTR;Body;5'UTR,5'UTR;Body;5'UTR,5'UTR;Body;5'UTR,5'UTR;Body;5'UTR,5'UTR;Body;5'UTR,5'UTR;Body;5'UTR,5'UTR;Body;5'UTR	_,N_Shelf,N_Shelf,N_Shelf	PRKCZ;PRKCZ;PRKCZ,PRKCZ;PRKCZ;PRKCZ,PRKCZ;PRKCZ;PRKCZ,PRKCZ;PRKCZ;PRKCZ,PRKCZ;PRKCZ;PRKCZ,PRKCZ;PRKCZ;PRKCZ,PRKCZ;PRKCZ;PRKCZ,PRKCZ;PRKCZ;PRKCZ,PRKCZ;PRKCZ;PRKCZ	NM_001033582;NM_002744;NM_001033581,NM_001033582;NM_002744;NM_001033581,NM_001033582;NM_002744;NM_001033581,NM_001033582;NM_002744;NM_001033581,NM_001033582;NM_002744;NM_001033581,NM_001033582;NM_002744;NM_001033581,NM_001033582;NM_002744;NM_001033581,NM_001033582;NM_002744;NM_001033581,NM_001033582;NM_002744;NM_001033581	hyperM.iPSC
1	2053735	2055123	7	cg06157219,cg18269141,cg25845463,cg04771433,cg15550572,cg09560161,cg16048006	5'UTR;Body;5'UTR,5'UTR;Body;5'UTR,5'UTR;Body;5'UTR,5'UTR;Body;5'UTR,5'UTR;Body;5'UTR,5'UTR;Body;5'UTR,5'UTR;Body;5'UTR	Island,Island,Island,N_Shore,N_Shore,N_Shore,N_Shore	PRKCZ;PRKCZ;PRKCZ,PRKCZ;PRKCZ;PRKCZ,PRKCZ;PRKCZ;PRKCZ,PRKCZ;PRKCZ;PRKCZ,PRKCZ;PRKCZ;PRKCZ,PRKCZ;PRKCZ;PRKCZ,PRKCZ;PRKCZ;PRKCZ	NM_001033582;NM_002744;NM_001033581,NM_001033582;NM_002744;NM_001033581,NM_001033582;NM_002744;NM_001033581,NM_001033582;NM_002744;NM_001033581,NM_001033582;NM_002744;NM_001033581,NM_001033582;NM_002744;NM_001033581,NM_001033582;NM_002744;NM_001033581	hyperM.iPSC
1	2056306	2056841	2	cg24776480,cg24042578	5'UTR;Body;5'UTR,5'UTR;Body;5'UTR	Island,S_Shore	PRKCZ;PRKCZ;PRKCZ,PRKCZ;PRKCZ;PRKCZ	NM_001033582;NM_002744;NM_001033581,NM_001033582;NM_002744;NM_001033581	hyperM.iPSC
1	2071844	2072382	3	cg07693617,cg02481000,cg17435831	Body;Body;Body,Body;Body;Body,Body;Body;Body	N_Shore,Island,Island	PRKCZ;PRKCZ;PRKCZ,PRKCZ;PRKCZ;PRKCZ,PRKCZ;PRKCZ;PRKCZ	NM_001033581;NM_001033582;NM_002744,NM_001033581;NM_001033582;NM_002744,NM_001033581;NM_001033582;NM_002744	hyperM.iPSC
1	2074179	2074455	2	cg05340048,cg00300046	Body;Body;Body,Body;Body;Body	S_Shore,S_Shelf	PRKCZ;PRKCZ;PRKCZ,PRKCZ;PRKCZ;PRKCZ	NM_001033581;NM_001033582;NM_002744,NM_001033581;NM_001033582;NM_002744	hyperM.iPSC
1	2075577	2075611	2	cg14989962,cg24054683	Body;Body;Body,Body;Body;Body	S_Shelf,S_Shelf	PRKCZ;PRKCZ;PRKCZ,PRKCZ;PRKCZ;PRKCZ	NM_001033581;NM_001033582;NM_002744,NM_001033581;NM_001033582;NM_002744	hyperM.iPSC
1	2080813	2080926	2	cg02840585,cg16813816	Body;Body;Body,Body;Body;Body	_,_	PRKCZ;PRKCZ;PRKCZ,PRKCZ;PRKCZ;PRKCZ	NM_001033581;NM_001033582;NM_002744,NM_001033581;NM_001033582;NM_002744	hyperM.iPSC
1	2082254	2082386	2	cg24604214,cg10219789	Body;Body;Body,Body;Body;Body	_,_	PRKCZ;PRKCZ;PRKCZ,PRKCZ;PRKCZ;PRKCZ	NM_001033581;NM_001033582;NM_002744,NM_001033581;NM_001033582;NM_002744	hyperM.iPSC
1	2088789	2092030	8	cg09144608,cg07222721,cg16644344,cg17156349,cg25727019,cg05776004,cg06801943,cg18025961	Body;Body;Body,Body;Body;Body,Body;Body;Body,Body;Body;Body,Body;Body;Body,Body;Body;Body,Body;Body;Body,Body;Body;Body	_,_	PRKCZ;PRKCZ;PRKCZ,PRKCZ;PRKCZ;PRKCZ,PRKCZ;PRKCZ;PRKCZ,PRKCZ;PRKCZ;PRKCZ,PRKCZ;PRKCZ;PRKCZ,PRKCZ;PRKCZ;PRKCZ,PRKCZ;PRKCZ;PRKCZ,PRKCZ;PRKCZ;PRKCZ	NM_001033581;NM_001033582;NM_002744,NM_001033581;NM_001033582;NM_002744,NM_001033581;NM_001033582;NM_002744,NM_001033581;NM_001033582;NM_002744,NM_001033581;NM_001033582;NM_002744,NM_001033581;NM_001033582;NM_002744,NM_001033581;NM_001033582;NM_002744,NM_001033581;NM_001033582;NM_002744	hyperM.iPSC
1	2096082	2097529	6	cg15468976,cg27264462,cg23648809,cg02393699,cg17025688,cg07896009	Body;Body;Body,Body;Body;Body,Body;Body;Body,Body;Body;Body,Body;Body;Body,Body;Body;Body	_,_	PRKCZ;PRKCZ;PRKCZ,PRKCZ;PRKCZ;PRKCZ,PRKCZ;PRKCZ;PRKCZ,PRKCZ;PRKCZ;PRKCZ,PRKCZ;PRKCZ;PRKCZ,PRKCZ;PRKCZ;PRKCZ	NM_001033581;NM_001033582;NM_002744,NM_001033581;NM_001033582;NM_002744,NM_001033581;NM_001033582;NM_002744,NM_001033581;NM_001033582;NM_002744,NM_001033581;NM_001033582;NM_002744,NM_001033581;NM_001033582;NM_002744	hyperM.iPSC
1	2099248	2099783	2	cg00175702,cg03395993	Body;Body;Body,Body;Body;Body	_,_	PRKCZ;PRKCZ;PRKCZ,PRKCZ;PRKCZ;PRKCZ	NM_001033581;NM_001033582;NM_002744,NM_001033581;NM_001033582;NM_002744	hyperM.iPSC
1	2111209	2111309	2	cg05337761,cg08200543	Body;Body;Body,Body;Body;Body	Island,Island	C1orf86;LOC100128003;C1orf86,C1orf86;LOC100128003;C1orf86	NM_001146310;NR_024445;NM_182533,NM_001146310;NR_024445;NM_182533	hyperM.iPSC
1	2114909	2115103	6	cg04118472,cg10314133,cg11503104,cg08933000,cg16718276,cg18397998	Body;TSS200;Body,Body;TSS200;Body,Body;TSS200;Body,Body;TSS200;Body,Body;TSS200;Body,Body;TSS1500;Body	N_Shore,N_Shore,N_Shore,N_Shore,N_Shore,N_Shore	C1orf86;LOC100128003;C1orf86,C1orf86;LOC100128003;C1orf86,C1orf86;LOC100128003;C1orf86,C1orf86;LOC100128003;C1orf86,C1orf86;LOC100128003;C1orf86,C1orf86;LOC100128003;C1orf86	NM_001146310;NR_024445;NM_182533,NM_001146310;NR_024445;NM_182533,NM_001146310;NR_024445;NM_182533,NM_001146310;NR_024445;NM_182533,NM_001146310;NR_024445;NM_182533,NM_001146310;NR_024445;NM_182533	hyperM.iPSC
1	2129765	2130411	2	cg15840005,cg18565264	TSS1500,TSS1500	S_Shelf,N_Shelf	C1orf86,C1orf86	NM_001146310,NM_001146310	hyperM.iPSC
1	2134104	2134976	3	cg00026222,cg15451548,cg23632393	_,_	Island,S_Shore,S_Shore	_,_	_,_	hyperM.iPSC
1	2151746	2153389	6	cg09469355,cg08884752,cg08640824,cg16417118,cg17942763,cg15132013	Body,Body,Body,Body,Body,Body	S_Shore,S_Shore,S_Shore,S_Shore,S_Shelf,S_Shelf	SKI,SKI,SKI,SKI,SKI,SKI	NM_003036,NM_003036,NM_003036,NM_003036,NM_003036,NM_003036	hyperM.iPSC
1	2154402	2156015	4	cg02058628,cg19404444,cg25139649,cg10397932	Body,Body,Body,Body	S_Shelf,S_Shelf,_	SKI,SKI,SKI,SKI	NM_003036,NM_003036,NM_003036,NM_003036	hyperM.iPSC
1	2160816	2161694	4	cg08270567,cg15979171,cg05156582,cg21775570	Body,Body,Body,Body	_,_	SKI,SKI,SKI,SKI	NM_003036,NM_003036,NM_003036,NM_003036	hyperM.iPSC
1	2178627	2178887	3	cg23645210,cg05937603,cg08730743	Body,Body,Body	_,_	SKI,SKI,SKI	NM_003036,NM_003036,NM_003036	hyperM.iPSC
1	2181159	2181214	2	cg26880297,cg25314600	Body,Body	_,_	SKI,SKI	NM_003036,NM_003036	hyperM.iPSC
1	2193449	2193508	2	cg01949002,cg12580943	Body,Body	_,_	SKI,SKI	NM_003036,NM_003036	hyperM.iPSC
1	2199817	2200195	2	cg08032228,cg15007228	Body,Body	N_Shelf,N_Shore	SKI,SKI	NM_003036,NM_003036	hyperM.iPSC
1	2211667	2212534	6	cg00715290,cg13488570,cg01628067,cg02737619,cg22940848,cg08271229	Body,Body,Body,Body,Body,Body	N_Shore,Island,Island,Island,Island,S_Shore	SKI,SKI,SKI,SKI,SKI,SKI	NM_003036,NM_003036,NM_003036,NM_003036,NM_003036,NM_003036	hyperM.iPSC
1	2218020	2218098	2	cg00330518,cg01606029	Body,Body	_,_	SKI,SKI	NM_003036,NM_003036	hyperM.iPSC
1	2220461	2220783	4	cg15935121,cg26332488,cg09556700,cg23022809	Body,Body,Body,Body	N_Shore,N_Shore,N_Shore,N_Shore	SKI,SKI,SKI,SKI	NM_003036,NM_003036,NM_003036,NM_003036	hyperM.iPSC
1	2221785	2222387	6	cg12552820,cg01852476,cg26017930,cg13727629,cg08703055,cg23015118	Body,Body,Body,Body,Body,Body	N_Shore,N_Shore,N_Shore,Island,Island,Island	SKI,SKI,SKI,SKI,SKI,SKI	NM_003036,NM_003036,NM_003036,NM_003036,NM_003036,NM_003036	hyperM.iPSC
1	2239756	2240656	4	cg06368978,cg13214309,cg03324138,cg00567930	_,_	S_Shore,S_Shore,S_Shore,S_Shore	_,_	_,_	hyperM.iPSC
1	2242654	2243673	4	cg22349332,cg14171516,cg27054514,cg21107210	3'UTR,Body,Body,Body	N_Shore,N_Shore,N_Shore,Island	MORN1,MORN1,MORN1,MORN1	NM_024848,NM_024848,NM_024848,NM_024848	hyperM.iPSC
1	2248013	2249738	3	cg08868601,cg00090764,cg27294168	Body,Body,Body	Island,Island,S_Shore	MORN1,MORN1,MORN1	NM_024848,NM_024848,NM_024848	hyperM.iPSC
1	2252092	2253525	4	cg07701579,cg13865934,cg02896354,cg17453416	Body,Body,Body,Body	N_Shelf,N_Shelf,N_Shelf,N_Shelf	MORN1,MORN1,MORN1,MORN1	NM_024848,NM_024848,NM_024848,NM_024848	hyperM.iPSC
1	2256291	2257086	3	cg02687883,cg05392448,cg26026567	Body,Body,Body	Island,S_Shore,S_Shore	MORN1,MORN1,MORN1	NM_024848,NM_024848,NM_024848	hyperM.iPSC
1	2259731	2259834	2	cg23738443,cg11070388	Body,Body	S_Shelf,S_Shelf	MORN1,MORN1	NM_024848,NM_024848	hyperM.iPSC
1	2263451	2264595	3	cg15839450,cg17866257,cg05787839	Body,Body,Body	N_Shelf,N_Shelf,N_Shore	MORN1,MORN1,MORN1	NM_024848,NM_024848,NM_024848	hyperM.iPSC
1	2269311	2269590	2	cg21145284,cg19374731	Body,Body	S_Shelf,S_Shelf	MORN1,MORN1	NM_024848,NM_024848	hyperM.iPSC
1	2274361	2275038	5	cg09811127,cg19084427,cg02473847,cg27305939,cg26808154	Body;TSS1500,Body;TSS1500,Body;TSS1500,Body;TSS1500,Body;TSS1500	_,_	MORN1;LOC100129534,MORN1;LOC100129534,MORN1;LOC100129534,MORN1;LOC100129534,MORN1;LOC100129534	NM_024848;NR_024489,NM_024848;NR_024489,NM_024848;NR_024489,NM_024848;NR_024489,NM_024848;NR_024489	hyperM.iPSC
1	2294175	2294920	3	cg09129839,cg01520454,cg04788743	Body,Body,Body	Island,Island,S_Shore	MORN1,MORN1,MORN1	NM_024848,NM_024848,NM_024848	hyperM.iPSC
1	2313730	2314256	5	cg13014406,cg11142617,cg09024606,cg13102658,cg03533858	TSS1500;5'UTR,TSS1500;5'UTR,TSS1500;5'UTR,TSS1500;5'UTR,TSS1500;5'UTR	S_Shore,S_Shore,S_Shore,S_Shore,S_Shore	MORN1;RER1,MORN1;RER1,MORN1;RER1,MORN1;RER1,MORN1;RER1	NM_024848;NM_007033,NM_024848;NM_007033,NM_024848;NM_007033,NM_024848;NM_007033,NM_024848;NM_007033	hyperM.iPSC
1	2326435	2328070	5	cg07220650,cg17468855,cg05124614,cg16523185,cg03764767	3'UTR;3'UTR;3'UTR,3'UTR;3'UTR;3'UTR,Body;Body,Body;Body,Body;Body	N_Shelf,N_Shelf,N_Shelf,N_Shelf,N_Shore	PEX10;RER1;PEX10,PEX10;RER1;PEX10,PEX10;PEX10,PEX10;PEX10,PEX10;PEX10	NM_002617;NM_007033;NM_153818,NM_002617;NM_007033;NM_153818,NM_002617;NM_153818,NM_002617;NM_153818,NM_002617;NM_153818	hyperM.iPSC
1	2339413	2340057	4	cg07012962,cg12656307,cg26857521,cg20826345	_,_	S_Shelf,S_Shelf,S_Shelf,_	_,_	_,_	hyperM.iPSC
1	2349518	2349934	4	cg07178553,cg12715395,cg22502001,cg06749803	_,_	N_Shore,Island,Island,Island	_,_	_,_	hyperM.iPSC
1	2355197	2355351	2	cg25880537,cg17506588	_,_	_,_	_,_	_,_	hyperM.iPSC
1	2360917	2361707	2	cg01309121,cg07507129	_,_	N_Shore,Island	_,_	_,_	hyperM.iPSC
1	2365550	2365979	2	cg05031204,cg13183298	_,_	Island,S_Shore	_,_	_,_	hyperM.iPSC
1	2373361	2373547	2	cg13384949,cg00157179	_,_	_,N_Shelf	_,_	_,_	hyperM.iPSC
1	2377530	2377933	2	cg05528623,cg24479820	_,_	Island,Island	_,_	_,_	hyperM.iPSC
1	2397512	2399726	6	cg11229415,cg21285056,cg20351495,cg01486818,cg23911852,cg14984126	TSS200,TSS200,Body,Body,Body,Body	N_Shelf,N_Shelf,N_Shore,N_Shore,Island,Island	PLCH2,PLCH2,PLCH2,PLCH2,PLCH2,PLCH2	NM_014638,NM_014638,NM_014638,NM_014638,NM_014638,NM_014638	hyperM.iPSC
1	2400864	2401503	8	cg10129768,cg07821364,cg20739281,cg17918280,cg15153700,cg04259720,cg06824523,cg19760917	Body,Body,Body,Body,Body,Body,Body,Body	N_Shore,Island,Island,Island,Island,S_Shore,S_Shore,S_Shore	PLCH2,PLCH2,PLCH2,PLCH2,PLCH2,PLCH2,PLCH2,PLCH2	NM_014638,NM_014638,NM_014638,NM_014638,NM_014638,NM_014638,NM_014638,NM_014638	hyperM.iPSC
1	2405059	2405825	2	cg03722487,cg26406394	Body,Body	Island,S_Shore	PLCH2,PLCH2	NM_014638,NM_014638	hyperM.iPSC
1	2413863	2415895	5	cg18023674,cg08039751,cg05772532,cg22495848,cg11692307	Body,Body,Body,Body,Body	_,_	PLCH2,PLCH2,PLCH2,PLCH2,PLCH2	NM_014638,NM_014638,NM_014638,NM_014638,NM_014638	hyperM.iPSC
1	2417940	2420109	9	cg00314892,cg06944249,cg24516259,cg24902038,cg09185998,cg15824094,cg11854493,cg09356083,cg05396298	Body,Body,Body,Body,Body,Body,Body,Body,Body	_,N_Shelf,N_Shelf,N_Shelf	PLCH2,PLCH2,PLCH2,PLCH2,PLCH2,PLCH2,PLCH2,PLCH2,PLCH2	NM_014638,NM_014638,NM_014638,NM_014638,NM_014638,NM_014638,NM_014638,NM_014638,NM_014638	hyperM.iPSC
1	2421245	2424075	7	cg24295985,cg00153101,cg15627072,cg14941600,cg16648140,cg26783079,cg12644668	Body,Body,Body,Body,Body,Body,Body	N_Shelf,N_Shore,N_Shore,N_Shore,Island,Island,N_Shore	PLCH2,PLCH2,PLCH2,PLCH2,PLCH2,PLCH2,PLCH2	NM_014638,NM_014638,NM_014638,NM_014638,NM_014638,NM_014638,NM_014638	hyperM.iPSC
1	2425096	2425492	2	cg24314879,cg19911801	Body,Body	Island,Island	PLCH2,PLCH2	NM_014638,NM_014638	hyperM.iPSC
1	2426743	2427518	4	cg10961249,cg25037677,cg05697866,cg15574442	3'UTR,_	S_Shore,S_Shore,S_Shore,S_Shore	PLCH2,_	NM_014638,_	hyperM.iPSC
1	2452224	2453733	3	cg05697909,cg13102889,cg27573975	TSS1500,TSS1500,_	S_Shore,S_Shore,S_Shore	HES5,HES5,_	NM_001010926,NM_001010926,_	hyperM.iPSC
1	2455264	2455404	2	cg18013789,cg15678662	_,_	N_Shore,N_Shore	_,_	_,_	hyperM.iPSC
1	2491568	2491797	3	cg11213235,cg10220117,cg07817856	_,_	_,_	_,_	_,_	hyperM.iPSC
1	2505552	2506376	2	cg02393107,cg17077288	_,_	N_Shore,N_Shore	_,_	_,_	hyperM.iPSC
1	2517116	2517362	2	cg02081327,cg03401452	Body,Body	Island,Island	MMEL1,MMEL1	NM_033467,NM_033467	hyperM.iPSC
1	2526507	2527445	3	cg09105687,cg22489883,cg04890237	Body,Body,Body	N_Shore,N_Shore,N_Shore	MMEL1,MMEL1,MMEL1	NM_033467,NM_033467,NM_033467	hyperM.iPSC
1	2532219	2532448	2	cg17843887,cg09808235	Body,Body	_,_	MMEL1,MMEL1	NM_033467,NM_033467	hyperM.iPSC
1	2549682	2549790	3	cg23606171,cg05874270,cg14510359	Body,Body,Body	N_Shore,Island,Island	MMEL1,MMEL1,MMEL1	NM_033467,NM_033467,NM_033467	hyperM.iPSC
1	2550914	2550982	2	cg21391741,cg13804377	5'UTR,5'UTR	Island,S_Shore	MMEL1,MMEL1	NM_033467,NM_033467	hyperM.iPSC
1	2694214	2697433	8	cg02328713,cg15080866,cg12085977,cg13205528,cg05442408,cg00017437,cg04866029,cg12593176	_,_	N_Shore,N_Shore,N_Shore,N_Shore,Island,Island,S_Shore,S_Shore	_,_	_,_	hyperM.iPSC
1	2707614	2708602	2	cg13463719,cg08142858	_,_	S_Shore,S_Shore	_,_	_,_	hyperM.iPSC
1	2709724	2709947	3	cg23984035,cg02894849,cg17822266	_,_	S_Shelf,S_Shelf,S_Shelf	_,_	_,_	hyperM.iPSC
1	2712186	2713077	5	cg02230408,cg25216300,cg24074480,cg02975102,cg17455297	_,_	_,_	_,_	_,_	hyperM.iPSC
1	2714444	2715683	5	cg20744353,cg14086822,cg06895313,cg01433109,cg20136609	_,_	_,_	_,_	_,_	hyperM.iPSC
1	2756579	2757102	4	cg11377464,cg18181363,cg22615275,cg15836046	_,_	_,_	_,_	_,_	hyperM.iPSC
1	2761706	2762524	6	cg24484895,cg08832782,cg01242872,cg13923696,cg07230639,cg03742273	_,_	N_Shore,N_Shore,Island,Island,Island,Island	_,_	_,_	hyperM.iPSC
1	2766832	2767365	5	cg03281194,cg11804692,cg06784198,cg24252695,cg22486046	_,_	N_Shore,Island,Island,Island,S_Shore	_,_	_,_	hyperM.iPSC
1	2768701	2768921	2	cg06853416,cg18163442	_,_	S_Shore,S_Shore	_,_	_,_	hyperM.iPSC
1	2774526	2775242	2	cg00698169,cg11401214	_,_	_,_	_,_	_,_	hyperM.iPSC
1	2778762	2779756	3	cg26262033,cg06738239,cg21570843	_,_	_,_	_,_	_,_	hyperM.iPSC
1	2782497	2783788	4	cg15522425,cg15325070,cg05640655,cg07996580	_,_	_,_	_,_	_,_	hyperM.iPSC
1	2786053	2786126	2	cg09027255,cg07559303	_,_	_,_	_,_	_,_	hyperM.iPSC
1	2789214	2792469	6	cg16572957,cg11414913,cg22616417,cg27442613,cg18235051,cg04132000	_,_	_,_	_,_	_,_	hyperM.iPSC
1	2809853	2810935	4	cg16115688,cg26785499,cg20849957,cg20385983	_,_	_,_	_,_	_,_	hyperM.iPSC
1	2813157	2813262	2	cg04551318,cg05000860	_,_	_,_	_,_	_,_	hyperM.iPSC
1	2817270	2818153	6	cg03447366,cg23887776,cg15622619,cg15515265,cg23089691,cg04914832	_,_	N_Shore,Island,Island,Island,Island,Island	_,_	_,_	hyperM.iPSC
1	2823503	2826451	7	cg16298867,cg06316219,cg27043144,cg13547132,cg09767550,cg14836978,cg04979216	_,_	_,_	_,_	_,_	hyperM.iPSC
1	2828790	2830037	5	cg24057775,cg00905419,cg02634762,cg00023726,cg19802390	_,_	_,_	_,_	_,_	hyperM.iPSC
1	2834028	2835374	5	cg24741158,cg10091792,cg23640231,cg00779565,cg15203905	_,_	N_Shelf,N_Shelf,N_Shelf,N_Shore,N_Shore	_,_	_,_	hyperM.iPSC
1	2836696	2838724	7	cg25367431,cg12415455,cg17403881,cg00413352,cg04141080,cg24428184,cg00878533	_,_	N_Shore,N_Shore,Island,Island,Island,S_Shore,N_Shore	_,_	_,_	hyperM.iPSC
1	2840101	2841362	7	cg21643748,cg13547712,cg13402298,cg00660693,cg21409829,cg09028711,cg04921646	_,_	N_Shore,N_Shore,Island,Island,Island,S_Shore,S_Shore	_,_	_,_	hyperM.iPSC
1	2852958	2853875	5	cg06184325,cg09135754,cg24592500,cg25137787,cg03986665	_,_	_,_	_,_	_,_	hyperM.iPSC
1	2855953	2856527	2	cg11702662,cg24412662	_,_	_,_	_,_	_,_	hyperM.iPSC
1	2868315	2868673	2	cg16298813,cg02576892	_,_	S_Shore,S_Shelf	_,_	_,_	hyperM.iPSC
1	2874945	2875104	4	cg27537199,cg01301282,cg11737757,cg23218354	_,_	Island,Island,Island,Island	_,_	_,_	hyperM.iPSC
1	2876728	2876940	2	cg04080530,cg20848343	_,_	Island,S_Shore	_,_	_,_	hyperM.iPSC
1	2880229	2880696	2	cg09938406,cg06437747	_,_	S_Shelf,S_Shelf	_,_	_,_	hyperM.iPSC
1	2886638	2886694	2	cg18644793,cg13300670	_,_	_,_	_,_	_,_	hyperM.iPSC
1	2889124	2890023	4	cg10226013,cg03737787,cg03654329,cg11142506	_,_	_,_	_,_	_,_	hyperM.iPSC
1	2907966	2908584	2	cg00028507,cg16678111	_,_	N_Shore,Island	_,_	_,_	hyperM.iPSC
1	2909645	2910463	2	cg07099084,cg20457544	_,_	S_Shore,S_Shore	_,_	_,_	hyperM.iPSC
1	2918263	2919454	5	cg03296283,cg23226249,cg20141398,cg22377505,cg17941579	_,_	N_Shore,N_Shore,N_Shore,Island,S_Shore	_,_	_,_	hyperM.iPSC
1	2927859	2928977	6	cg04716261,cg18123385,cg10888031,cg06169627,cg07795402,cg05162202	TSS200,1stExon;5'UTR,1stExon,1stExon,1stExon,1stExon	N_Shore,N_Shore,Island,Island,Island,S_Shore	ACTRT2,ACTRT2;ACTRT2,ACTRT2,ACTRT2,ACTRT2,ACTRT2	NM_080431,NM_080431;NM_080431,NM_080431,NM_080431,NM_080431,NM_080431	hyperM.iPSC
1	2930685	2931235	2	cg23087661,cg10122878	_,_	S_Shore,S_Shelf	_,_	_,_	hyperM.iPSC
1	2936587	2938372	5	cg03976712,cg23960572,cg26864691,cg06866827,cg00169776	_,_	_,_	_,_	_,_	hyperM.iPSC
1	2943968	2944110	2	cg13491144,cg06792538	_,_	_,_	_,_	_,_	hyperM.iPSC
1	2973786	2974135	5	cg03256938,cg06991974,cg07946633,cg10802480,cg12140144	Body;Body,Body;Body,Body;TSS1500;Body;TSS1500,Body;TSS1500;Body;TSS1500,Body;TSS1500;Body;TSS1500	Island,Island,Island,Island,Island	FLJ42875;FLJ42875,FLJ42875;FLJ42875,FLJ42875;PRDM16;FLJ42875;PRDM16,FLJ42875;PRDM16;FLJ42875;PRDM16,FLJ42875;PRDM16;FLJ42875;PRDM16	NR_024371;NR_015440,NR_024371;NR_015440,NR_024371;NM_199454;NR_015440;NM_022114,NR_024371;NM_199454;NR_015440;NM_022114,NR_024371;NM_199454;NR_015440;NM_022114	hypoM.iPSC
1	2977774	2977821	2	cg22122862,cg18509466	Body;Body,Body;Body	Island,Island	PRDM16;PRDM16,PRDM16;PRDM16	NM_022114;NM_199454,NM_022114;NM_199454	hypoM.iPSC
1	2982480	2982500	2	cg14030836,cg16372810	Body;Body,Body;Body	S_Shore,S_Shore	PRDM16;PRDM16,PRDM16;PRDM16	NM_022114;NM_199454,NM_022114;NM_199454	hyperM.iPSC
1	2983911	2987602	9	cg06348826,cg17890044,cg12436196,cg08262220,cg25308086,cg12297125,cg00806481,cg24490279,cg07922619	Body;Body,Body;Body,Body;Body,Body;Body,Body;Body,Body;Body,Body;Body,Body;Body,Body;Body	N_Shelf,N_Shelf,N_Shore,N_Shore,N_Shore,N_Shore,N_Shore,Island,N_Shore	PRDM16;PRDM16,PRDM16;PRDM16,PRDM16;PRDM16,PRDM16;PRDM16,PRDM16;PRDM16,PRDM16;PRDM16,PRDM16;PRDM16,PRDM16;PRDM16,PRDM16;PRDM16	NM_022114;NM_199454,NM_022114;NM_199454,NM_022114;NM_199454,NM_022114;NM_199454,NM_022114;NM_199454,NM_022114;NM_199454,NM_022114;NM_199454,NM_022114;NM_199454,NM_022114;NM_199454	hyperM.iPSC
1	2989056	2989446	3	cg04493316,cg04674248,cg10572807	Body;Body,Body;Body,Body;Body	N_Shore,N_Shore,N_Shore	PRDM16;PRDM16,PRDM16;PRDM16,PRDM16;PRDM16	NM_022114;NM_199454,NM_022114;NM_199454,NM_022114;NM_199454	hyperM.iPSC
1	2993099	2993550	3	cg15505198,cg03525023,cg13460934	Body;Body,Body;Body,Body;Body	S_Shelf,S_Shelf,S_Shelf	PRDM16;PRDM16,PRDM16;PRDM16,PRDM16;PRDM16	NM_022114;NM_199454,NM_022114;NM_199454,NM_022114;NM_199454	hyperM.iPSC
1	3017331	3018895	7	cg21604357,cg08876274,cg07597386,cg24529814,cg14761019,cg12905252,cg23987257	Body;Body,Body;Body,Body;Body,Body;Body,Body;Body,Body;Body,Body;Body	N_Shore,Island,Island,Island,Island,S_Shore,S_Shore	PRDM16;PRDM16,PRDM16;PRDM16,PRDM16;PRDM16,PRDM16;PRDM16,PRDM16;PRDM16,PRDM16;PRDM16,PRDM16;PRDM16	NM_022114;NM_199454,NM_022114;NM_199454,NM_022114;NM_199454,NM_022114;NM_199454,NM_022114;NM_199454,NM_022114;NM_199454,NM_022114;NM_199454	hyperM.iPSC
1	3021320	3022659	4	cg20632748,cg02712922,cg03583979,cg03447135	Body;Body,Body;Body,Body;Body,Body;Body	S_Shelf,S_Shelf,S_Shelf,_	PRDM16;PRDM16,PRDM16;PRDM16,PRDM16;PRDM16,PRDM16;PRDM16	NM_022114;NM_199454,NM_022114;NM_199454,NM_022114;NM_199454,NM_022114;NM_199454	hyperM.iPSC
1	3026028	3028567	7	cg05223638,cg16348158,cg21394778,cg22851557,cg01772149,cg14008571,cg24741666	Body;Body,Body;Body,Body;Body,Body;Body,Body;Body,Body;Body,Body;Body	N_Shore,N_Shore,N_Shore,Island,Island,S_Shore,S_Shore	PRDM16;PRDM16,PRDM16;PRDM16,PRDM16;PRDM16,PRDM16;PRDM16,PRDM16;PRDM16,PRDM16;PRDM16,PRDM16;PRDM16	NM_022114;NM_199454,NM_022114;NM_199454,NM_022114;NM_199454,NM_022114;NM_199454,NM_022114;NM_199454,NM_022114;NM_199454,NM_022114;NM_199454	hyperM.iPSC
1	3034601	3034912	5	cg04132510,cg23818827,cg21209214,cg15135176,cg21383687	Body;Body,Body;Body,Body;Body,Body;Body,Body;Body	_,_	PRDM16;PRDM16,PRDM16;PRDM16,PRDM16;PRDM16,PRDM16;PRDM16,PRDM16;PRDM16	NM_022114;NM_199454,NM_022114;NM_199454,NM_022114;NM_199454,NM_022114;NM_199454,NM_022114;NM_199454	hyperM.iPSC
1	3040697	3043444	5	cg10124445,cg00713435,cg14200569,cg15121959,cg07367222	Body;Body,Body;Body,Body;Body,Body;Body,Body;Body	_,N_Shelf,N_Shelf	PRDM16;PRDM16,PRDM16;PRDM16,PRDM16;PRDM16,PRDM16;PRDM16,PRDM16;PRDM16	NM_022114;NM_199454,NM_022114;NM_199454,NM_022114;NM_199454,NM_022114;NM_199454,NM_022114;NM_199454	hyperM.iPSC
1	3046012	3046631	4	cg05117823,cg06617975,cg26545580,cg01647724	Body;Body,Body;Body,Body;Body,Body;Body	N_Shore,Island,Island,Island	PRDM16;PRDM16,PRDM16;PRDM16,PRDM16;PRDM16,PRDM16;PRDM16	NM_022114;NM_199454,NM_022114;NM_199454,NM_022114;NM_199454,NM_022114;NM_199454	hyperM.iPSC
1	3047670	3049127	9	cg00049709,cg05343184,cg03226435,cg19243842,cg22510139,cg24968931,cg14516243,cg13388191,cg01047045	Body;Body,Body;Body,Body;Body,Body;Body,Body;Body,Body;Body,Body;Body,Body;Body,Body;Body	N_Shore,N_Shore,N_Shore,N_Shore,N_Shore,Island,Island,Island,Island	PRDM16;PRDM16,PRDM16;PRDM16,PRDM16;PRDM16,PRDM16;PRDM16,PRDM16;PRDM16,PRDM16;PRDM16,PRDM16;PRDM16,PRDM16;PRDM16,PRDM16;PRDM16	NM_022114;NM_199454,NM_022114;NM_199454,NM_022114;NM_199454,NM_022114;NM_199454,NM_022114;NM_199454,NM_022114;NM_199454,NM_022114;NM_199454,NM_022114;NM_199454,NM_022114;NM_199454	hyperM.iPSC
1	3061823	3062503	4	cg20236995,cg09321238,cg01104489,cg26222332	Body;Body,Body;Body,Body;Body,Body;Body	Island,Island,Island,S_Shore	PRDM16;PRDM16,PRDM16;PRDM16,PRDM16;PRDM16,PRDM16;PRDM16	NM_022114;NM_199454,NM_022114;NM_199454,NM_022114;NM_199454,NM_022114;NM_199454	hyperM.iPSC
1	3063574	3063666	2	cg12096707,cg08110058	Body;Body,Body;Body	S_Shore,S_Shore	PRDM16;PRDM16,PRDM16;PRDM16	NM_022114;NM_199454,NM_022114;NM_199454	hyperM.iPSC
1	3067216	3068066	4	cg22029284,cg06367135,cg01448098,cg16265140	Body;Body,Body;Body,Body;Body,Body;Body	N_Shelf,N_Shelf,N_Shelf,N_Shelf	PRDM16;PRDM16,PRDM16;PRDM16,PRDM16;PRDM16,PRDM16;PRDM16	NM_022114;NM_199454,NM_022114;NM_199454,NM_022114;NM_199454,NM_022114;NM_199454	hyperM.iPSC
1	3070583	3070938	2	cg06182121,cg01203812	Body;Body,Body;Body	N_Shore,Island	PRDM16;PRDM16,PRDM16;PRDM16	NM_022114;NM_199454,NM_022114;NM_199454	hyperM.iPSC
1	3077497	3077859	4	cg02299950,cg20154143,cg14217558,cg26435254	Body;Body,Body;Body,Body;Body,Body;Body	_,_	PRDM16;PRDM16,PRDM16;PRDM16,PRDM16;PRDM16,PRDM16;PRDM16	NM_022114;NM_199454,NM_022114;NM_199454,NM_022114;NM_199454,NM_022114;NM_199454	hyperM.iPSC
1	3078936	3079622	3	cg05755889,cg04277097,cg20699701	Body;Body,Body;Body,Body;Body	_,_	PRDM16;PRDM16,PRDM16;PRDM16,PRDM16;PRDM16	NM_022114;NM_199454,NM_022114;NM_199454,NM_022114;NM_199454	hyperM.iPSC
1	3088489	3090357	7	cg07902789,cg14018153,cg13393782,cg14966901,cg07209071,cg18759102,cg05354921	Body;Body,Body;Body,Body;Body,Body;Body,Body;Body,Body;Body,Body;Body	N_Shelf,N_Shelf,N_Shelf,N_Shelf,N_Shelf,N_Shelf,N_Shelf	PRDM16;PRDM16,PRDM16;PRDM16,PRDM16;PRDM16,PRDM16;PRDM16,PRDM16;PRDM16,PRDM16;PRDM16,PRDM16;PRDM16	NM_022114;NM_199454,NM_022114;NM_199454,NM_022114;NM_199454,NM_022114;NM_199454,NM_022114;NM_199454,NM_022114;NM_199454,NM_022114;NM_199454	hyperM.iPSC
1	3092908	3093902	3	cg05952379,cg13781678,cg10696969	Body;Body,Body;Body,Body;Body	Island,Island,N_Shore	PRDM16;PRDM16,PRDM16;PRDM16,PRDM16;PRDM16	NM_022114;NM_199454,NM_022114;NM_199454,NM_022114;NM_199454	hyperM.iPSC
1	3104945	3105405	3	cg13983181,cg07364162,cg10115320	Body;Body,Body;Body,Body;Body	S_Shelf,S_Shelf,S_Shelf	PRDM16;PRDM16,PRDM16;PRDM16,PRDM16;PRDM16	NM_022114;NM_199454,NM_022114;NM_199454,NM_022114;NM_199454	hyperM.iPSC
1	3109873	3110879	3	cg07345710,cg26153353,cg16555926	Body;Body,Body;Body,Body;Body	_,_	PRDM16;PRDM16,PRDM16;PRDM16,PRDM16;PRDM16	NM_022114;NM_199454,NM_022114;NM_199454,NM_022114;NM_199454	hyperM.iPSC
1	3113360	3113714	3	cg17839324,cg00581154,cg22729726	Body;Body,Body;Body,Body;Body	_,_	PRDM16;PRDM16,PRDM16;PRDM16,PRDM16;PRDM16	NM_022114;NM_199454,NM_022114;NM_199454,NM_022114;NM_199454	hyperM.iPSC
1	3115766	3115893	2	cg05656251,cg19706803	Body;Body,Body;Body	_,_	PRDM16;PRDM16,PRDM16;PRDM16	NM_022114;NM_199454,NM_022114;NM_199454	hyperM.iPSC
1	3120345	3120395	2	cg04988794,cg06659980	Body;Body,Body;Body	_,_	PRDM16;PRDM16,PRDM16;PRDM16	NM_022114;NM_199454,NM_022114;NM_199454	hyperM.iPSC
1	3123671	3126388	9	cg04022097,cg08266202,cg23025459,cg10493186,cg03125480,cg01940181,cg16393928,cg17489690,cg26053881	Body;Body,Body;Body,Body;Body,Body;Body,Body;Body,Body;Body,Body;Body,Body;Body,Body;Body	_,_	PRDM16;PRDM16,PRDM16;PRDM16,PRDM16;PRDM16,PRDM16;PRDM16,PRDM16;PRDM16,PRDM16;PRDM16,PRDM16;PRDM16,PRDM16;PRDM16,PRDM16;PRDM16	NM_022114;NM_199454,NM_022114;NM_199454,NM_022114;NM_199454,NM_022114;NM_199454,NM_022114;NM_199454,NM_022114;NM_199454,NM_022114;NM_199454,NM_022114;NM_199454,NM_022114;NM_199454	hyperM.iPSC
1	3129510	3130569	3	cg08739115,cg04499214,cg05712300	Body;Body,Body;Body,Body;Body	_,_	PRDM16;PRDM16,PRDM16;PRDM16,PRDM16;PRDM16	NM_022114;NM_199454,NM_022114;NM_199454,NM_022114;NM_199454	hyperM.iPSC
1	3132785	3134396	9	cg24499605,cg22497969,cg07029287,cg23631759,cg06970451,cg26864297,cg21262776,cg05790380,cg24514678	Body;Body,Body;Body,Body;Body,Body;Body,Body;Body,Body;Body,Body;Body,Body;Body,Body;Body	_,N_Shelf,N_Shelf,N_Shelf,N_Shelf	PRDM16;PRDM16,PRDM16;PRDM16,PRDM16;PRDM16,PRDM16;PRDM16,PRDM16;PRDM16,PRDM16;PRDM16,PRDM16;PRDM16,PRDM16;PRDM16,PRDM16;PRDM16	NM_022114;NM_199454,NM_022114;NM_199454,NM_022114;NM_199454,NM_022114;NM_199454,NM_022114;NM_199454,NM_022114;NM_199454,NM_022114;NM_199454,NM_022114;NM_199454,NM_022114;NM_199454	hyperM.iPSC
1	3137482	3138670	6	cg21786372,cg24641193,cg00895834,cg07956247,cg14969646,cg05628625	Body;Body,Body;Body,Body;Body,Body;Body,Body;Body,Body;Body	N_Shore,Island,Island,Island,S_Shore,S_Shore	PRDM16;PRDM16,PRDM16;PRDM16,PRDM16;PRDM16,PRDM16;PRDM16,PRDM16;PRDM16,PRDM16;PRDM16	NM_022114;NM_199454,NM_022114;NM_199454,NM_022114;NM_199454,NM_022114;NM_199454,NM_022114;NM_199454,NM_022114;NM_199454	hyperM.iPSC
1	3144560	3145825	4	cg21412629,cg09282201,cg04509221,cg03082523	Body;Body,Body;Body,Body;Body,Body;Body	N_Shore,Island,Island,N_Shore	PRDM16;PRDM16,PRDM16;PRDM16,PRDM16;PRDM16,PRDM16;PRDM16	NM_022114;NM_199454,NM_022114;NM_199454,NM_022114;NM_199454,NM_022114;NM_199454	hyperM.iPSC
1	3147181	3149428	6	cg11392550,cg00663575,cg08160128,cg24645149,cg25706502,cg07832245	Body;Body,Body;Body,Body;Body,Body;Body,Body;Body,Body;Body	N_Shore,Island,Island,S_Shore,S_Shore,S_Shore	PRDM16;PRDM16,PRDM16;PRDM16,PRDM16;PRDM16,PRDM16;PRDM16,PRDM16;PRDM16,PRDM16;PRDM16	NM_022114;NM_199454,NM_022114;NM_199454,NM_022114;NM_199454,NM_022114;NM_199454,NM_022114;NM_199454,NM_022114;NM_199454	hyperM.iPSC
1	3150599	3154502	13	cg23085167,cg04876124,cg22730864,cg19704073,cg12800122,cg27229529,cg10952596,cg13427179,cg19825974,cg22440573,cg24939838,cg18240463,cg21475097	Body;Body,Body;Body,Body;Body,Body;Body,Body;Body,Body;Body,Body;Body,Body;Body,Body;Body,Body;Body,Body;Body,Body;Body,Body;Body	N_Shelf,N_Shelf,N_Shelf,N_Shore,N_Shore,N_Shore,N_Shore,N_Shore,N_Shore,Island,Island,Island,Island	PRDM16;PRDM16,PRDM16;PRDM16,PRDM16;PRDM16,PRDM16;PRDM16,PRDM16;PRDM16,PRDM16;PRDM16,PRDM16;PRDM16,PRDM16;PRDM16,PRDM16;PRDM16,PRDM16;PRDM16,PRDM16;PRDM16,PRDM16;PRDM16,PRDM16;PRDM16	NM_022114;NM_199454,NM_022114;NM_199454,NM_022114;NM_199454,NM_022114;NM_199454,NM_022114;NM_199454,NM_022114;NM_199454,NM_022114;NM_199454,NM_022114;NM_199454,NM_022114;NM_199454,NM_022114;NM_199454,NM_022114;NM_199454,NM_022114;NM_199454,NM_022114;NM_199454	hyperM.iPSC
1	3156459	3156572	2	cg20165545,cg19904265	Body;Body,Body;Body	S_Shore,S_Shelf	PRDM16;PRDM16,PRDM16;PRDM16	NM_022114;NM_199454,NM_022114;NM_199454	hyperM.iPSC
1	3181079	3182402	9	cg03449456,cg12141662,cg00329272,cg19263228,cg17601209,cg20988960,cg26520908,cg12660813,cg15357022	Body;Body,Body;Body,Body;Body,Body;Body,Body;Body,Body;Body,Body;Body,Body;Body,Body;Body	_,N_Shelf,N_Shelf,N_Shelf,N_Shelf,N_Shelf,N_Shelf,N_Shelf	PRDM16;PRDM16,PRDM16;PRDM16,PRDM16;PRDM16,PRDM16;PRDM16,PRDM16;PRDM16,PRDM16;PRDM16,PRDM16;PRDM16,PRDM16;PRDM16,PRDM16;PRDM16	NM_022114;NM_199454,NM_022114;NM_199454,NM_022114;NM_199454,NM_022114;NM_199454,NM_022114;NM_199454,NM_022114;NM_199454,NM_022114;NM_199454,NM_022114;NM_199454,NM_022114;NM_199454	hyperM.iPSC
1	3185889	3185902	2	cg24256745,cg00701856	Body;Body,Body;Body	Island,Island	PRDM16;PRDM16,PRDM16;PRDM16	NM_022114;NM_199454,NM_022114;NM_199454	hyperM.iPSC
1	3189510	3190446	2	cg07212761,cg23034362	Body;Body,Body;Body	S_Shelf,N_Shelf	PRDM16;PRDM16,PRDM16;PRDM16	NM_022114;NM_199454,NM_022114;NM_199454	hyperM.iPSC
1	3191718	3191813	2	cg01196079,cg17421241	Body;Body,Body;Body	N_Shore,N_Shore	PRDM16;PRDM16,PRDM16;PRDM16	NM_022114;NM_199454,NM_022114;NM_199454	hyperM.iPSC
1	3199379	3200284	3	cg00152878,cg14659814,cg24298696	Body;Body,Body;Body,Body;Body	_,_	PRDM16;PRDM16,PRDM16;PRDM16,PRDM16;PRDM16	NM_022114;NM_199454,NM_022114;NM_199454,NM_022114;NM_199454	hyperM.iPSC
1	3203291	3203650	2	cg08642716,cg04907885	Body;Body,Body;Body	_,_	PRDM16;PRDM16,PRDM16;PRDM16	NM_022114;NM_199454,NM_022114;NM_199454	hyperM.iPSC
1	3218826	3220469	7	cg06380199,cg10893986,cg09845604,cg15605124,cg16394551,cg15491247,cg17435683	Body;Body,Body;Body,Body;Body,Body;Body,Body;Body,Body;Body,Body;Body	_,_	PRDM16;PRDM16,PRDM16;PRDM16,PRDM16;PRDM16,PRDM16;PRDM16,PRDM16;PRDM16,PRDM16;PRDM16,PRDM16;PRDM16	NM_022114;NM_199454,NM_022114;NM_199454,NM_022114;NM_199454,NM_022114;NM_199454,NM_022114;NM_199454,NM_022114;NM_199454,NM_022114;NM_199454	hyperM.iPSC
1	3223867	3224504	3	cg01793374,cg04882365,cg15156029	Body;Body,Body;Body,Body;Body	_,_	PRDM16;PRDM16,PRDM16;PRDM16,PRDM16;PRDM16	NM_022114;NM_199454,NM_022114;NM_199454,NM_022114;NM_199454	hyperM.iPSC
1	3229572	3229776	2	cg12753787,cg18369939	Body;Body,Body;Body	N_Shore,Island	PRDM16;PRDM16,PRDM16;PRDM16	NM_022114;NM_199454,NM_022114;NM_199454	hyperM.iPSC
1	3255599	3255783	2	cg26004086,cg14216672	Body;Body,Body;Body	_,_	PRDM16;PRDM16,PRDM16;PRDM16	NM_022114;NM_199454,NM_022114;NM_199454	hyperM.iPSC
1	3262522	3263267	3	cg06970772,cg13209113,cg17493795	Body;Body,Body;Body,Body;Body	N_Shelf,N_Shelf,N_Shore	PRDM16;PRDM16,PRDM16;PRDM16,PRDM16;PRDM16	NM_022114;NM_199454,NM_022114;NM_199454,NM_022114;NM_199454	hyperM.iPSC
1	3266273	3266395	3	cg27588093,cg06911744,cg26000536	Body;Body,Body;Body,Body;Body	S_Shore,S_Shore,S_Shore	PRDM16;PRDM16,PRDM16;PRDM16,PRDM16;PRDM16	NM_022114;NM_199454,NM_022114;NM_199454,NM_022114;NM_199454	hyperM.iPSC
1	3272617	3273348	3	cg03126058,cg16686396,cg08831401	Body;Body,Body;Body,Body;Body	_,_	PRDM16;PRDM16,PRDM16;PRDM16,PRDM16;PRDM16	NM_022114;NM_199454,NM_022114;NM_199454,NM_022114;NM_199454	hyperM.iPSC
1	3292337	3297075	12	cg01079872,cg20962938,cg04882222,cg12034510,cg18024629,cg15641565,cg06824308,cg15385853,cg24878051,cg00251678,cg15059176,cg11397493	Body;Body,Body;Body,Body;Body,Body;Body,Body;Body,Body;Body,Body;Body,Body;Body,Body;Body,Body;Body,Body;Body,Body;Body	_,N_Shelf,N_Shelf,N_Shelf,N_Shelf,N_Shelf,N_Shelf,N_Shore,N_Shore,N_Shore,Island	PRDM16;PRDM16,PRDM16;PRDM16,PRDM16;PRDM16,PRDM16;PRDM16,PRDM16;PRDM16,PRDM16;PRDM16,PRDM16;PRDM16,PRDM16;PRDM16,PRDM16;PRDM16,PRDM16;PRDM16,PRDM16;PRDM16,PRDM16;PRDM16	NM_022114;NM_199454,NM_022114;NM_199454,NM_022114;NM_199454,NM_022114;NM_199454,NM_022114;NM_199454,NM_022114;NM_199454,NM_022114;NM_199454,NM_022114;NM_199454,NM_022114;NM_199454,NM_022114;NM_199454,NM_022114;NM_199454,NM_022114;NM_199454	hyperM.iPSC
1	3305141	3305357	2	cg16120249,cg17286074	Body;Body,Body;Body	_,_	PRDM16;PRDM16,PRDM16;PRDM16	NM_022114;NM_199454,NM_022114;NM_199454	hyperM.iPSC
1	3309124	3310598	5	cg23999080,cg12635919,cg05968369,cg17438636,cg01065697	Body;Body,Body;Body,Body;Body,Body;Body,Body;Body	N_Shelf,N_Shore,N_Shore,N_Shore,N_Shore	PRDM16;PRDM16,PRDM16;PRDM16,PRDM16;PRDM16,PRDM16;PRDM16,PRDM16;PRDM16	NM_022114;NM_199454,NM_022114;NM_199454,NM_022114;NM_199454,NM_022114;NM_199454,NM_022114;NM_199454	hyperM.iPSC
1	3312082	3312169	2	cg10504805,cg26017484	Body;Body,Body;Body	Island,Island	PRDM16;PRDM16,PRDM16;PRDM16	NM_022114;NM_199454,NM_022114;NM_199454	hyperM.iPSC
1	3318453	3318739	2	cg24395386,cg25480121	Body;Body,Body;Body	Island,Island	PRDM16;PRDM16,PRDM16;PRDM16	NM_022114;NM_199454,NM_022114;NM_199454	hyperM.iPSC
1	3321014	3322565	8	cg04346637,cg17137218,cg02999781,cg10588310,cg08007925,cg14171460,cg18396811,cg17412901	Body;Body,Body;Body,Body;Body,Body;Body,Body;Body,Body;Body,Body;Body,Body;Body	Island,Island,Island,Island,Island,Island,S_Shore,S_Shore	PRDM16;PRDM16,PRDM16;PRDM16,PRDM16;PRDM16,PRDM16;PRDM16,PRDM16;PRDM16,PRDM16;PRDM16,PRDM16;PRDM16,PRDM16;PRDM16	NM_022114;NM_199454,NM_022114;NM_199454,NM_022114;NM_199454,NM_022114;NM_199454,NM_022114;NM_199454,NM_022114;NM_199454,NM_022114;NM_199454,NM_022114;NM_199454	hyperM.iPSC
1	3329730	3330047	4	cg10248231,cg01913436,cg01261194,cg03748986	Body;Body,Body;Body,Body;Body,Body;Body	N_Shelf,N_Shore,N_Shore,N_Shore	PRDM16;PRDM16,PRDM16;PRDM16,PRDM16;PRDM16,PRDM16;PRDM16	NM_022114;NM_199454,NM_022114;NM_199454,NM_022114;NM_199454,NM_022114;NM_199454	hyperM.iPSC
1	3331804	3332586	4	cg13299984,cg20387569,cg07109490,cg10685531	Body;Body,Body;Body,Body;Body,Body;Body	N_Shore,Island,Island,Island	PRDM16;PRDM16,PRDM16;PRDM16,PRDM16;PRDM16,PRDM16;PRDM16	NM_022114;NM_199454,NM_022114;NM_199454,NM_022114;NM_199454,NM_022114;NM_199454	hyperM.iPSC
1	3334155	3334740	2	cg03352346,cg13858944	Body;Body,Body;Body	S_Shore,S_Shelf	PRDM16;PRDM16,PRDM16;PRDM16	NM_022114;NM_199454,NM_022114;NM_199454	hyperM.iPSC
1	3338431	3338675	2	cg11251399,cg11236641	Body;Body,Body;Body	N_Shelf,N_Shelf	PRDM16;PRDM16,PRDM16;PRDM16	NM_022114;NM_199454,NM_022114;NM_199454	hyperM.iPSC
1	3340300	3340418	2	cg04285727,cg13692649	3'UTR;3'UTR,3'UTR;3'UTR	N_Shore,N_Shore	PRDM16;PRDM16,PRDM16;PRDM16	NM_199454;NM_022114,NM_199454;NM_022114	hyperM.iPSC
1	3341475	3342846	3	cg01773689,cg23022057,cg00063748	3'UTR;3'UTR,3'UTR;3'UTR,3'UTR;3'UTR	Island,S_Shore,S_Shore	PRDM16;PRDM16,PRDM16;PRDM16,PRDM16;PRDM16	NM_199454;NM_022114,NM_199454;NM_022114,NM_199454;NM_022114	hyperM.iPSC
1	3359970	3360696	2	cg02061553,cg05462426	TSS1500,TSS1500	N_Shore,N_Shore	ARHGEF16,ARHGEF16	NM_014448,NM_014448	hyperM.iPSC
1	3368086	3368238	2	cg06980565,cg17841541	5'UTR,5'UTR	_,_	ARHGEF16,ARHGEF16	NM_014448,NM_014448	hyperM.iPSC
1	3370110	3370148	2	cg03916277,cg24919884	Body,Body	_,_	ARHGEF16,ARHGEF16	NM_014448,NM_014448	hyperM.iPSC
1	3372425	3374865	7	cg15015996,cg13580226,cg14039138,cg22032563,cg16097329,cg24371534,cg20933326	Body,Body,Body,Body,Body,Body,Body	_,_	ARHGEF16,ARHGEF16,ARHGEF16,ARHGEF16,ARHGEF16,ARHGEF16,ARHGEF16	NM_014448,NM_014448,NM_014448,NM_014448,NM_014448,NM_014448,NM_014448	hyperM.iPSC
1	3378966	3379829	3	cg24039149,cg02328660,cg04488647	Body,Body,Body	_,_	ARHGEF16,ARHGEF16,ARHGEF16	NM_014448,NM_014448,NM_014448	hyperM.iPSC
1	3383873	3385118	6	cg01269514,cg26365786,cg17741539,cg02731917,cg09180894,cg12097441	Body,Body,Body,Body,Body,Body	N_Shore,N_Shore,N_Shore,Island,Island,S_Shore	ARHGEF16,ARHGEF16,ARHGEF16,ARHGEF16,ARHGEF16,ARHGEF16	NM_014448,NM_014448,NM_014448,NM_014448,NM_014448,NM_014448	hyperM.iPSC
1	3386203	3387481	5	cg18885125,cg26940122,cg00571809,cg24036039,cg10020040	Body,Body,Body,Body,3'UTR	S_Shore,S_Shore,S_Shore,S_Shore,S_Shelf	ARHGEF16,ARHGEF16,ARHGEF16,ARHGEF16,ARHGEF16	NM_014448,NM_014448,NM_014448,NM_014448,NM_014448	hyperM.iPSC
1	3391557	3391608	2	cg13901857,cg12611135	_,_	_,_	_,_	_,_	hyperM.iPSC
1	3405533	3406941	3	cg26786407,cg16043635,cg11391665	Body,Body,Body	_,_	MEGF6,MEGF6,MEGF6	NM_001409,NM_001409,NM_001409	hyperM.iPSC
1	3410675	3410708	2	cg18024358,cg21156590	Body,Body	_,_	MEGF6,MEGF6	NM_001409,NM_001409	hyperM.iPSC
1	3425747	3425975	2	cg05641278,cg09230667	Body,Body	N_Shore,Island	MEGF6,MEGF6	NM_001409,NM_001409	hyperM.iPSC
1	3448164	3448437	2	cg02073224,cg22400959	Body,Body	N_Shore,N_Shore	MEGF6,MEGF6	NM_001409,NM_001409	hyperM.iPSC
1	3449809	3450327	4	cg06511312,cg27450668,cg22791030,cg02233459	Body,Body,Body,Body	Island,Island,Island,S_Shore	MEGF6,MEGF6,MEGF6,MEGF6	NM_001409,NM_001409,NM_001409,NM_001409	hyperM.iPSC
1	3463525	3464236	3	cg02955098,cg26607673,cg12612393	Body,Body,Body	_,_	MEGF6,MEGF6,MEGF6	NM_001409,NM_001409,NM_001409	hyperM.iPSC
1	3467152	3468076	4	cg06883956,cg15903571,cg07720540,cg01432902	Body;Body,Body;Body,Body;TSS200,Body;TSS1500	_,_	MEGF6;MIR551A,MEGF6;MIR551A,MEGF6;MIR551A,MEGF6;MIR551A	NM_001409;NR_030277,NM_001409;NR_030277,NM_001409;NR_030277,NM_001409;NR_030277	hyperM.iPSC
1	3485471	3485577	2	cg12615205,cg14263070	Body,Body	_,_	MEGF6,MEGF6	NM_001409,NM_001409	hyperM.iPSC
1	3493340	3493985	2	cg04572969,cg12715285	Body,Body	S_Shelf,S_Shelf	MEGF6,MEGF6	NM_001409,NM_001409	hyperM.iPSC
1	3502103	3502637	2	cg03957235,cg18394881	Body,Body	S_Shore,S_Shore	MEGF6,MEGF6	NM_001409,NM_001409	hyperM.iPSC
1	3504781	3505054	2	cg06775523,cg24953596	Body,Body	S_Shelf,S_Shelf	MEGF6,MEGF6	NM_001409,NM_001409	hyperM.iPSC
1	3513460	3514952	4	cg20769487,cg04549679,cg20628733,cg19498239	Body,Body,Body,Body	_,N_Shelf,N_Shelf,N_Shelf	MEGF6,MEGF6,MEGF6,MEGF6	NM_001409,NM_001409,NM_001409,NM_001409	hyperM.iPSC
1	3556810	3557730	5	cg22822803,cg10038618,cg24678611,cg12475507,cg01434649	TSS1500,TSS1500;TSS1500,TSS1500;TSS1500,TSS1500;TSS1500,TSS1500;TSS1500	Island,Island,Island,Island,Island	WDR8,TP73;WDR8,TP73;WDR8,TP73;WDR8,TP73;WDR8	NM_017818,NM_005427;NM_017818,NM_005427;NM_017818,NM_005427;NM_017818,NM_005427;NM_017818	hypoM.iPSC
1	3564564	3565534	3	cg05936300,cg20768358,cg04137576	5'UTR,5'UTR,5'UTR	_,_	TP73,TP73,TP73	NM_005427,NM_005427,NM_005427	hyperM.iPSC
1	3575085	3575284	2	cg22048228,cg09248714	5'UTR,5'UTR	_,_	TP73,TP73	NM_005427,NM_005427	hyperM.iPSC
1	3579722	3581108	4	cg04600984,cg22383924,cg27055894,cg25593794	5'UTR,5'UTR,5'UTR,5'UTR	_,_	TP73,TP73,TP73,TP73	NM_005427,NM_005427,NM_005427,NM_005427	hyperM.iPSC
1	3595839	3595942	3	cg24356964,cg23052055,cg00589002	TSS1500;TSS1500;Body;TSS1500,TSS1500;TSS1500;Body;TSS1500,TSS1500;TSS1500;Body;TSS1500	N_Shore,N_Shore,N_Shore	TP73;TP73;TP73;TP73,TP73;TP73;TP73;TP73,TP73;TP73;TP73;TP73	NM_001126240;NM_001126242;NM_005427;NM_001126241,NM_001126240;NM_001126242;NM_005427;NM_001126241,NM_001126240;NM_001126242;NM_005427;NM_001126241	hyperM.iPSC
1	3603668	3604438	4	cg15161371,cg15487097,cg18279180,cg14666108	Body;Body;Body;Body,Body;Body;Body;Body,Body;Body;Body;Body,Body;Body;Body;Body	_,_	TP73;TP73;TP73;TP73,TP73;TP73;TP73;TP73,TP73;TP73;TP73;TP73,TP73;TP73;TP73;TP73	NM_001126240;NM_005427;NM_001126242;NM_001126241,NM_001126240;NM_005427;NM_001126242;NM_001126241,NM_001126240;NM_005427;NM_001126242;NM_001126241,NM_001126240;NM_005427;NM_001126242;NM_001126241	hyperM.iPSC
1	3605575	3606358	2	cg20628743,cg22234529	Body;Body;Body;Body,Body;Body;Body;Body	_,_	TP73;TP73;TP73;TP73,TP73;TP73;TP73;TP73	NM_001126240;NM_005427;NM_001126242;NM_001126241,NM_001126240;NM_005427;NM_001126242;NM_001126241	hyperM.iPSC
1	3607521	3607683	2	cg17907911,cg09363206	Body;Body;Body;Body,Body;Body;Body;Body	_,_	TP73;TP73;TP73;TP73,TP73;TP73;TP73;TP73	NM_001126240;NM_005427;NM_001126242;NM_001126241,NM_001126240;NM_005427;NM_001126242;NM_001126241	hyperM.iPSC
1	3609434	3611990	8	cg17967071,cg07045089,cg00505606,cg06996273,cg19819912,cg06646112,cg04523603,cg26810690	Body;Body;Body;Body,Body;Body;Body;Body,Body;Body;Body;Body,Body;Body;Body;Body,Body;Body;Body;Body,Body;Body;Body;Body,Body;Body;Body;Body,Body;Body;Body;Body	N_Shelf,N_Shelf,N_Shelf,N_Shelf,N_Shelf,N_Shore,N_Shore,N_Shore	TP73;TP73;TP73;TP73,TP73;TP73;TP73;TP73,TP73;TP73;TP73;TP73,TP73;TP73;TP73;TP73,TP73;TP73;TP73;TP73,TP73;TP73;TP73;TP73,TP73;TP73;TP73;TP73,TP73;TP73;TP73;TP73	NM_001126240;NM_005427;NM_001126242;NM_001126241,NM_001126240;NM_005427;NM_001126242;NM_001126241,NM_001126240;NM_005427;NM_001126242;NM_001126241,NM_001126240;NM_005427;NM_001126242;NM_001126241,NM_001126240;NM_005427;NM_001126242;NM_001126241,NM_001126240;NM_005427;NM_001126242;NM_001126241,NM_001126240;NM_005427;NM_001126242;NM_001126241,NM_001126240;NM_005427;NM_001126242;NM_001126241	hyperM.iPSC
1	3613179	3613465	3	cg26034538,cg05782471,cg21418707	Body;Body;Body;Body,Body;Body;Body;Body,Body;Body;Body;Body	Island,Island,S_Shore	TP73;TP73;TP73;TP73,TP73;TP73;TP73;TP73,TP73;TP73;TP73;TP73	NM_001126240;NM_005427;NM_001126242;NM_001126241,NM_001126240;NM_005427;NM_001126242;NM_001126241,NM_001126240;NM_005427;NM_001126242;NM_001126241	hyperM.iPSC
1	3615172	3615269	2	cg14660788,cg12268562	Body;Body;Body;Body,Body;Body;Body;Body	S_Shore,S_Shore	TP73;TP73;TP73;TP73,TP73;TP73;TP73;TP73	NM_001126240;NM_005427;NM_001126242;NM_001126241,NM_001126240;NM_005427;NM_001126242;NM_001126241	hyperM.iPSC
1	3623904	3625070	4	cg11970695,cg06376715,cg22039909,cg25352980	Body;Body;Body;Body,Body;Body;Body;Body,Body;Body;Body;Body,Body;Body;Body;Body	N_Shore,Island,Island,S_Shore	TP73;TP73;TP73;TP73,TP73;TP73;TP73;TP73,TP73;TP73;TP73;TP73,TP73;TP73;TP73;TP73	NM_001126240;NM_005427;NM_001126242;NM_001126241,NM_001126240;NM_005427;NM_001126242;NM_001126241,NM_001126240;NM_005427;NM_001126242;NM_001126241,NM_001126240;NM_005427;NM_001126242;NM_001126241	hyperM.iPSC
1	3638609	3639831	7	cg03664527,cg25196575,cg02924487,cg17804348,cg07178825,cg17986341,cg24845675	Body;Body;3'UTR;Body,Body;Body;3'UTR;Body,Body;Body;3'UTR;3'UTR,Body;Body;3'UTR;3'UTR,Body;Body;3'UTR;3'UTR,3'UTR;3'UTR;3'UTR;3'UTR,3'UTR;3'UTR;3'UTR;3'UTR	N_Shore,N_Shore,Island,Island,Island,S_Shore,S_Shore	TP73;TP73;TP73;TP73,TP73;TP73;TP73;TP73,TP73;TP73;TP73;TP73,TP73;TP73;TP73;TP73,TP73;TP73;TP73;TP73,TP73;TP73;TP73;TP73,TP73;TP73;TP73;TP73	NM_001126240;NM_005427;NM_001126242;NM_001126241,NM_001126240;NM_005427;NM_001126242;NM_001126241,NM_001126240;NM_005427;NM_001126242;NM_001126241,NM_001126240;NM_005427;NM_001126242;NM_001126241,NM_001126240;NM_005427;NM_001126242;NM_001126241,NM_001126240;NM_001126242;NM_005427;NM_001126241,NM_001126240;NM_001126242;NM_005427;NM_001126241	hyperM.iPSC
1	3654472	3655049	2	cg11746651,cg02255801	TSS1500,TSS1500	S_Shore,S_Shore	KIAA0495,KIAA0495	NM_207306,NM_207306	hyperM.iPSC
1	3662957	3663188	3	cg01903504,cg26785743,cg17217195	Body,Body,Body	_,_	CCDC27,CCDC27,CCDC27	NM_152492,NM_152492,NM_152492	hyperM.iPSC
1	3670205	3670280	2	cg22942897,cg00788699	Body,Body	_,_	CCDC27,CCDC27	NM_152492,NM_152492	hyperM.iPSC
1	3676209	3678117	4	cg24719086,cg03937687,cg10634712,cg02214783	Body,Body,Body,TSS1500	N_Shelf,N_Shore,N_Shore,N_Shore	CCDC27,CCDC27,CCDC27,LOC388588	NM_152492,NM_152492,NM_152492,NM_001163724	hyperM.iPSC
1	3679543	3682355	5	cg01535630,cg09850012,cg10555106,cg00105640,cg07586042	5'UTR,5'UTR,5'UTR,Body,3'UTR	Island,S_Shore,S_Shore,S_Shelf,S_Shelf	LOC388588,LOC388588,LOC388588,LOC388588,LOC388588	NM_001163724,NM_001163724,NM_001163724,NM_001163724,NM_001163724	hyperM.iPSC
1	3721367	3721410	2	cg03338968,cg09357795	3'UTR,3'UTR	Island,Island	KIAA0562,KIAA0562	NM_014704,NM_014704	hyperM.iPSC
1	3728316	3728470	2	cg21402968,cg20313677	Body,Body	_,_	KIAA0562,KIAA0562	NM_014704,NM_014704	hyperM.iPSC
1	3764687	3765066	5	cg22157494,cg22671931,cg06178315,cg04289045,cg16964673	TSS1500;Body,TSS1500;Body,TSS1500;Body,TSS1500;Body,TSS1500;Body	N_Shore,N_Shore,N_Shore,Island,Island	KIAA0562;DFFB,KIAA0562;DFFB,KIAA0562;DFFB,KIAA0562;DFFB,KIAA0562;DFFB	NM_014704;NM_004402,NM_014704;NM_004402,NM_014704;NM_004402,NM_014704;NM_004402,NM_014704;NM_004402	hyperM.iPSC
1	3812622	3814238	7	cg00935967,cg11983469,cg13560072,cg14264496,cg26248091,cg09228402,cg24143374	Body,Body,Body,Body,Body,Body,Body	N_Shore,N_Shore,N_Shore,N_Shore,Island,Island,Island	LOC100133612,LOC100133612,LOC100133612,LOC100133612,LOC100133612,LOC100133612,LOC100133612	NR_024455,NR_024455,NR_024455,NR_024455,NR_024455,NR_024455,NR_024455	hyperM.iPSC
1	3816285	3817511	4	cg12279968,cg22344254,cg09362969,cg24432048	Body,Body,Body,Body	S_Shore,S_Shelf,S_Shelf,S_Shelf	LOC100133612,LOC100133612,LOC100133612,LOC100133612	NR_024455,NR_024455,NR_024455,NR_024455	hyperM.iPSC
1	3820899	3821174	2	cg23595256,cg21861174	Body,Body	_,_	LOC100133612,LOC100133612	NR_024455,NR_024455	hyperM.iPSC
1	3822911	3822952	2	cg24640609,cg16271823	_,_	_,_	_,_	_,_	hyperM.iPSC
1	3900014	3900460	2	cg00647233,cg26233172	_,_	_,_	_,_	_,_	hyperM.iPSC
1	3903901	3904269	3	cg15598265,cg10950868,cg17418784	_,_	_,_	_,_	_,_	hyperM.iPSC
1	3907941	3907950	2	cg16679832,cg20011075	_,_	_,_	_,_	_,_	hyperM.iPSC
1	3936398	3936813	2	cg16558307,cg02293501	_,_	_,_	_,_	_,_	hyperM.iPSC
1	3968330	3968401	2	cg26910994,cg17876128	_,_	_,_	_,_	_,_	hyperM.iPSC
1	3979055	3979146	2	cg03426423,cg18288558	_,_	_,_	_,_	_,_	hyperM.iPSC
1	3987042	3987536	2	cg25469923,cg20703997	_,_	_,_	_,_	_,_	hyperM.iPSC
1	4092677	4094272	5	cg21813377,cg15022359,cg13224197,cg04902529,cg06529149	_,_	Island,Island,Island,S_Shore,S_Shore	_,_	_,_	hyperM.iPSC
1	4121476	4122171	2	cg07425646,cg03972745	_,_	Island,S_Shore	_,_	_,_	hyperM.iPSC
1	4367911	4367949	2	cg16264537,cg04571522	_,_	_,_	_,_	_,_	hyperM.iPSC
1	4370816	4371927	4	cg10322419,cg17907200,cg17282035,cg01388988	TSS1500,TSS1500,TSS1500,TSS200	_,_	LOC284661,LOC284661,LOC284661,LOC284661	NR_027088,NR_027088,NR_027088,NR_027088	hyperM.iPSC
1	4385342	4385489	2	cg15708696,cg25195604	_,_	_,_	_,_	_,_	hyperM.iPSC
1	4441330	4441415	2	cg04142011,cg09269935	_,_	_,_	_,_	_,_	hyperM.iPSC
1	4442564	4442629	2	cg21271015,cg01720475	_,_	_,_	_,_	_,_	hyperM.iPSC
1	4477180	4477225	2	cg16815850,cg03312565	_,_	_,_	_,_	_,_	hyperM.iPSC
1	4559548	4560031	2	cg01785490,cg16906964	_,_	_,_	_,_	_,_	hyperM.iPSC
1	4561279	4562008	2	cg09278610,cg15645728	_,_	_,_	_,_	_,_	hyperM.iPSC
1	4597779	4597827	2	cg16512885,cg24037938	_,_	_,_	_,_	_,_	hyperM.iPSC
1	4611279	4612215	2	cg26840333,cg04306992	_,_	N_Shelf,N_Shore	_,_	_,_	hyperM.iPSC
1	4618072	4618433	2	cg26599630,cg22367872	Body;Body,Body;Body	S_Shore,S_Shelf	AJAP1;AJAP1,AJAP1;AJAP1	NM_018836;NM_001042478,NM_018836;NM_001042478	hyperM.iPSC
1	4635959	4636047	2	cg13056990,cg24694502	Body;Body,Body;Body	_,_	AJAP1;AJAP1,AJAP1;AJAP1	NM_018836;NM_001042478,NM_018836;NM_001042478	hyperM.iPSC
1	4670795	4671542	2	cg11735846,cg02837536	Body;Body,Body;Body	N_Shore,Island	AJAP1;AJAP1,AJAP1;AJAP1	NM_018836;NM_001042478,NM_018836;NM_001042478	hypoM.iPSC
1	4672117	4672949	4	cg11791914,cg20624157,cg21159274,cg00692462	Body;Body,Body;Body,Body;Body,Body;Body	Island,Island,S_Shore,S_Shore	AJAP1;AJAP1,AJAP1;AJAP1,AJAP1;AJAP1,AJAP1;AJAP1	NM_018836;NM_001042478,NM_018836;NM_001042478,NM_018836;NM_001042478,NM_018836;NM_001042478	hyperM.iPSC
1	4693932	4694974	5	cg21913897,cg27181471,cg04110918,cg13480658,cg24350011	Body;Body,Body;Body,Body;Body,Body;Body,Body;Body	_,_	AJAP1;AJAP1,AJAP1;AJAP1,AJAP1;AJAP1,AJAP1;AJAP1,AJAP1;AJAP1	NM_018836;NM_001042478,NM_018836;NM_001042478,NM_018836;NM_001042478,NM_018836;NM_001042478,NM_018836;NM_001042478	hyperM.iPSC
1	4715732	4716580	2	cg00562969,cg04292104	Body;Body,Body;Body	_,_	AJAP1;AJAP1,AJAP1;AJAP1	NM_018836;NM_001042478,NM_018836;NM_001042478	hyperM.iPSC
1	4730304	4731060	2	cg23015920,cg02411275	Body;Body,Body;Body	N_Shore,N_Shore	AJAP1;AJAP1,AJAP1;AJAP1	NM_018836;NM_001042478,NM_018836;NM_001042478	hyperM.iPSC
1	4732212	4732409	4	cg22025570,cg11926510,cg06966242,cg10400362	Body;Body,Body;Body,Body;Body,Body;Body	Island,Island,Island,Island	AJAP1;AJAP1,AJAP1;AJAP1,AJAP1;AJAP1,AJAP1;AJAP1	NM_018836;NM_001042478,NM_018836;NM_001042478,NM_018836;NM_001042478,NM_018836;NM_001042478	hyperM.iPSC
1	4735158	4735272	2	cg00859330,cg19760464	3'UTR;3'UTR,3'UTR;3'UTR	S_Shelf,S_Shelf	AJAP1;AJAP1,AJAP1;AJAP1	NM_018836;NM_001042478,NM_018836;NM_001042478	hyperM.iPSC
1	4741773	4742578	4	cg01418817,cg26353694,cg25552937,cg00504341	3'UTR,3'UTR,3'UTR,3'UTR	_,_	AJAP1,AJAP1,AJAP1,AJAP1	NM_018836,NM_018836,NM_018836,NM_018836	hyperM.iPSC
1	4936928	4936957	2	cg00972140,cg09257020	_,_	_,_	_,_	_,_	hyperM.iPSC
1	5256331	5256438	2	cg19158553,cg24305579	_,_	_,_	_,_	_,_	hyperM.iPSC
1	5462595	5463537	5	cg00397103,cg25065518,cg12527097,cg16173186,cg06371555	_,_	_,_	_,_	_,_	hyperM.iPSC
1	5508734	5508944	2	cg06642219,cg10620434	_,_	_,_	_,_	_,_	hyperM.iPSC
1	5695921	5696846	2	cg07311363,cg00947686	_,_	S_Shore,S_Shore	_,_	_,_	hyperM.iPSC
1	5701750	5701970	3	cg11596090,cg24834921,cg11207799	_,_	_,_	_,_	_,_	hyperM.iPSC
1	5716348	5716434	2	cg14565332,cg03421104	_,_	Island,S_Shore	_,_	_,_	hyperM.iPSC
1	5792984	5793001	2	cg25980388,cg08133525	_,_	_,_	_,_	_,_	hyperM.iPSC
1	5816494	5817481	2	cg06954199,cg15505277	_,_	_,_	_,_	_,_	hyperM.iPSC
1	5818637	5819240	4	cg23619890,cg13133560,cg09317508,cg19500334	_,_	_,_	_,_	_,_	hyperM.iPSC
1	5829989	5830095	3	cg12041830,cg07928086,cg07599881	_,_	_,_	_,_	_,_	hyperM.iPSC
1	5839980	5840432	4	cg12438598,cg15728744,cg24864189,cg24883265	_,_	_,_	_,_	_,_	hyperM.iPSC
1	5841742	5842290	2	cg16176837,cg22506757	_,_	_,_	_,_	_,_	hyperM.iPSC
1	5873538	5874530	3	cg22399023,cg16164843,cg22129135	Body,Body,Body	Island,Island,S_Shore	NPHP4,NPHP4,NPHP4	NM_015102,NM_015102,NM_015102	hyperM.iPSC
1	5933889	5933896	2	cg22356839,cg13951223	Body,Body	_,_	NPHP4,NPHP4	NM_015102,NM_015102	hyperM.iPSC
1	5958136	5958380	2	cg26003933,cg09275986	Body,Body	_,_	NPHP4,NPHP4	NM_015102,NM_015102	hyperM.iPSC
1	5986043	5986416	3	cg13069237,cg22692659,cg24926052	_,_	_,_	_,_	_,_	hyperM.iPSC
1	6008386	6009239	6	cg01934408,cg18192083,cg03400374,cg19814116,cg05701590,cg06753281	TSS1500;TSS1500,TSS200;TSS200,TSS200;TSS200,1stExon;1stExon;5'UTR;5'UTR,1stExon;1stExon;5'UTR;5'UTR,5'UTR;5'UTR	N_Shore,Island,Island,Island,Island,S_Shore	KCNAB2;KCNAB2,KCNAB2;KCNAB2,KCNAB2;KCNAB2,KCNAB2;KCNAB2;KCNAB2;KCNAB2,KCNAB2;KCNAB2;KCNAB2;KCNAB2,KCNAB2;KCNAB2	NM_003636;NM_172130,NM_003636;NM_172130,NM_003636;NM_172130,NM_172130;NM_003636;NM_003636;NM_172130,NM_172130;NM_003636;NM_003636;NM_172130,NM_003636;NM_172130	hyperM.iPSC
1	6016357	6016792	2	cg11740026,cg25220769	5'UTR;5'UTR,5'UTR;5'UTR	_,_	KCNAB2;KCNAB2,KCNAB2;KCNAB2	NM_003636;NM_172130,NM_003636;NM_172130	hyperM.iPSC
1	6027590	6029126	7	cg17106415,cg00352913,cg24591969,cg16400756,cg27298072,cg00813560,cg15731035	Body;Body,Body;Body,Body;Body,Body;Body,Body;Body,Body;Body,Body;Body	_,_	KCNAB2;KCNAB2,KCNAB2;KCNAB2,KCNAB2;KCNAB2,KCNAB2;KCNAB2,KCNAB2;KCNAB2,KCNAB2;KCNAB2,KCNAB2;KCNAB2	NM_003636;NM_172130,NM_003636;NM_172130,NM_003636;NM_172130,NM_003636;NM_172130,NM_003636;NM_172130,NM_003636;NM_172130,NM_003636;NM_172130	hyperM.iPSC
1	6034067	6034258	3	cg01907457,cg05372828,cg02630629	Body;Body,Body;Body,Body;Body	N_Shore,Island,Island	KCNAB2;KCNAB2,KCNAB2;KCNAB2,KCNAB2;KCNAB2	NM_003636;NM_172130,NM_003636;NM_172130,NM_003636;NM_172130	hyperM.iPSC
1	6048726	6048754	2	cg12770003,cg01014986	Body;Body,Body;Body	_,_	KCNAB2;KCNAB2,KCNAB2;KCNAB2	NM_003636;NM_172130,NM_003636;NM_172130	hyperM.iPSC
1	6056015	6057014	3	cg00773460,cg24446610,cg11194299	Body;Body,Body;Body,Body;Body	S_Shore,S_Shelf,S_Shelf	KCNAB2;KCNAB2,KCNAB2;KCNAB2,KCNAB2;KCNAB2	NM_003636;NM_172130,NM_003636;NM_172130,NM_003636;NM_172130	hyperM.iPSC
1	6060355	6061391	4	cg06118571,cg25880365,cg17179571,cg20415848	Body;Body,Body;Body,Body;Body,Body;Body	_,_	KCNAB2;KCNAB2,KCNAB2;KCNAB2,KCNAB2;KCNAB2,KCNAB2;KCNAB2	NM_003636;NM_172130,NM_003636;NM_172130,NM_003636;NM_172130,NM_003636;NM_172130	hyperM.iPSC
1	6071636	6072031	3	cg24545495,cg24152353,cg13243674	Body;Body,Body;Body,Body;Body	_,_	KCNAB2;KCNAB2,KCNAB2;KCNAB2,KCNAB2;KCNAB2	NM_003636;NM_172130,NM_003636;NM_172130,NM_003636;NM_172130	hyperM.iPSC
1	6076668	6076936	2	cg03549532,cg09036263	Body;Body,Body;Body	_,_	KCNAB2;KCNAB2,KCNAB2;KCNAB2	NM_003636;NM_172130,NM_003636;NM_172130	hyperM.iPSC
1	6081230	6082730	4	cg16053064,cg12705326,cg22451356,cg21776674	3'UTR;3'UTR,3'UTR;3'UTR,3'UTR;3'UTR,3'UTR;3'UTR	_,_	KCNAB2;KCNAB2,KCNAB2;KCNAB2,KCNAB2;KCNAB2,KCNAB2;KCNAB2	NM_172130;NM_003636,NM_172130;NM_003636,NM_172130;NM_003636,NM_172130;NM_003636	hyperM.iPSC
1	6086607	6087322	2	cg13103815,cg05382282	3'UTR,3'UTR	_,_	CHD5,CHD5	NM_015557,NM_015557	hyperM.iPSC
1	6094267	6094375	2	cg05781512,cg20773915	Body,Body	_,_	CHD5,CHD5	NM_015557,NM_015557	hyperM.iPSC
1	6107584	6108250	2	cg03548963,cg26574904	Body,Body	N_Shelf,N_Shelf	CHD5,CHD5	NM_015557,NM_015557	hyperM.iPSC
1	6114457	6114698	3	cg15125762,cg05371688,cg03770108	Body,Body,Body	S_Shelf,S_Shelf,S_Shelf	CHD5,CHD5,CHD5	NM_015557,NM_015557,NM_015557	hyperM.iPSC
1	6124438	6124996	3	cg21919596,cg27312709,cg18283627	Body,Body,Body	N_Shore,N_Shore,S_Shore	CHD5,CHD5,CHD5	NM_015557,NM_015557,NM_015557	hyperM.iPSC
1	6127912	6129839	5	cg11069824,cg15727545,cg19308227,cg18391058,cg00587890	Body,Body,Body,Body,Body	N_Shelf,N_Shelf,N_Shelf,N_Shore,N_Shore	CHD5,CHD5,CHD5,CHD5,CHD5	NM_015557,NM_015557,NM_015557,NM_015557,NM_015557	hyperM.iPSC
1	6137359	6138212	2	cg22224462,cg03115470	Body,Body	_,_	CHD5,CHD5	NM_015557,NM_015557	hyperM.iPSC
1	6158675	6159958	3	cg24331282,cg17479763,cg04714195	Body,Body,Body	N_Shelf,N_Shelf,N_Shore	CHD5,CHD5,CHD5	NM_015557,NM_015557,NM_015557	hyperM.iPSC
1	6161203	6161744	2	cg08899938,cg15578645	Body,Body	N_Shore,N_Shore	CHD5,CHD5	NM_015557,NM_015557	hyperM.iPSC
1	6182933	6182947	2	cg26935168,cg08107735	TSS1500,TSS1500	S_Shore,S_Shore	RPL22,RPL22	NM_000983,NM_000983	hyperM.iPSC
1	6187658	6188947	6	cg21211271,cg19180828,cg15584788,cg03716999,cg24870568,cg08611163	TSS1500,TSS1500,TSS1500,TSS1500,TSS1500,5'UTR;1stExon	N_Shore,N_Shore,N_Shore,N_Shore,N_Shore,Island	RNF207,RNF207,RNF207,RNF207,RNF207,RNF207;RNF207	NM_207396,NM_207396,NM_207396,NM_207396,NM_207396,NM_207396;NM_207396	hypoM.iPSC
1	6217243	6217437	3	cg05925365,cg00518190,cg12396368	Body,Body,Body	N_Shore,N_Shore,N_Shore	ICMT,ICMT,ICMT	NM_012405,NM_012405,NM_012405	hyperM.iPSC
1	6225866	6226380	2	cg00769305,cg18564053	TSS1500,TSS1500	N_Shore,N_Shore	HES3,HES3	NM_001024598,NM_001024598	hyperM.iPSC
1	6256089	6256454	3	cg26250989,cg03961030,cg15100947	Body;Body;Body;Body,Body;Body;Body;Body,Body;Body;Body;Body	_,_	ACOT7;ACOT7;ACOT7;ACOT7,ACOT7;ACOT7;ACOT7;ACOT7,ACOT7;ACOT7;ACOT7;ACOT7	NM_181864;NM_181865;NM_007274;NM_181866,NM_181864;NM_181865;NM_007274;NM_181866,NM_181864;NM_181865;NM_007274;NM_181866	hyperM.iPSC
1	6263727	6263874	2	cg13066938,cg09249800	Body;Body;Body;Body,Body;Body;Body;Body	Island,Island	ACOT7;ACOT7;ACOT7;ACOT7,ACOT7;ACOT7;ACOT7;ACOT7	NM_181864;NM_181865;NM_007274;NM_181866,NM_181864;NM_181865;NM_007274;NM_181866	hyperM.iPSC
1	6312640	6313417	6	cg13549940,cg18167466,cg25706257,cg10976772,cg00081799,cg16170708	Body;Body;Body;Body,Body;Body;Body;Body,Body;Body;Body;Body,Body;Body;Body;Body,Body;Body;Body;Body,Body;Body;Body;Body	_,_	ACOT7;ACOT7;ACOT7;ACOT7,ACOT7;ACOT7;ACOT7;ACOT7,ACOT7;ACOT7;ACOT7;ACOT7,ACOT7;ACOT7;ACOT7;ACOT7,ACOT7;ACOT7;ACOT7;ACOT7,ACOT7;ACOT7;ACOT7;ACOT7	NM_181864;NM_181865;NM_007274;NM_181866,NM_181864;NM_181865;NM_007274;NM_181866,NM_181864;NM_181865;NM_007274;NM_181866,NM_181864;NM_181865;NM_007274;NM_181866,NM_181864;NM_181865;NM_007274;NM_181866,NM_181864;NM_181865;NM_007274;NM_181866	hyperM.iPSC
1	6376913	6376926	2	cg25165880,cg09273516	TSS1500,TSS1500	S_Shore,S_Shore	ACOT7,ACOT7	NM_007274,NM_007274	hyperM.iPSC
1	6401202	6402011	3	cg07104732,cg17447502,cg14832908	3'UTR,3'UTR,Body	N_Shore,N_Shore,Island	HES2,HES2,HES2	NM_019089,NM_019089,NM_019089	hyperM.iPSC
1	6406594	6407904	4	cg19253827,cg09549827,cg24153044,cg13066963	TSS1500,TSS1500,1stExon,Body	N_Shore,Island,Island,Island	ESPN,ESPN,ESPN,ESPN	NM_031475,NM_031475,NM_031475,NM_031475	hyperM.iPSC
1	6437192	6438911	4	cg10210806,cg06085683,cg00833822,cg07017737	Body,Body,Body,Body	Island,Island,Island,Island	ESPN,ESPN,ESPN,ESPN	NM_031475,NM_031475,NM_031475,NM_031475	hyperM.iPSC
1	6443708	6444077	3	cg23449295,cg11404945,cg10982045	_,3'UTR;3'UTR;3'UTR;3'UTR;3'UTR	Island,Island,Island	_,TNFRSF25;TNFRSF25;TNFRSF25;TNFRSF25;TNFRSF25	_,NM_148970;NM_148966;NM_148965;NM_148967;NM_003790	hyperM.iPSC
1	6446839	6447229	2	cg10230885,cg02988775	3'UTR;Body;Body;Body;Body;Body,Body;Body;Body;Body;Body;Body	N_Shore,N_Shore	TNFRSF25;TNFRSF25;TNFRSF25;TNFRSF25;TNFRSF25;TNFRSF25,TNFRSF25;TNFRSF25;TNFRSF25;TNFRSF25;TNFRSF25;TNFRSF25	NM_001039664;NM_148967;NM_003790;NM_148970;NM_148966;NM_148965,NM_148967;NM_003790;NM_148970;NM_001039664;NM_148966;NM_148965	hyperM.iPSC
1	6449988	6450848	2	cg15088325,cg25028293	TSS1500;3'UTR;TSS1500;3'UTR;3'UTR;TSS1500;3'UTR;TSS1500;TSS1500;3'UTR;TSS1500,Body;Body;Body;Body;Body	S_Shore,N_Shelf	TNFRSF25;PLEKHG5;TNFRSF25;PLEKHG5;PLEKHG5;TNFRSF25;PLEKHG5;TNFRSF25;TNFRSF25;PLEKHG5;TNFRSF25,PLEKHG5;PLEKHG5;PLEKHG5;PLEKHG5;PLEKHG5	NM_148966;NM_001042663;NM_148965;NM_001042665;NM_001042664;NM_003790;NM_198681;NM_148970;NM_001039664;NM_020631;NM_148967,NM_001042664;NM_001042665;NM_198681;NM_020631;NM_001042663	hyperM.iPSC
1	6466168	6467098	2	cg12946080,cg17151560	5'UTR;5'UTR;Body;5'UTR;Body,5'UTR;5'UTR;Body;5'UTR;Body	N_Shore,N_Shore	PLEKHG5;PLEKHG5;PLEKHG5;PLEKHG5;PLEKHG5,PLEKHG5;PLEKHG5;PLEKHG5;PLEKHG5;PLEKHG5	NM_020631;NM_001042665;NM_198681;NM_001042664;NM_001042663,NM_020631;NM_001042665;NM_198681;NM_001042664;NM_001042663	hyperM.iPSC
1	6467744	6467759	2	cg05462761,cg15205204	5'UTR;5'UTR;Body;5'UTR;Body,5'UTR;5'UTR;Body;5'UTR;Body	Island,Island	PLEKHG5;PLEKHG5;PLEKHG5;PLEKHG5;PLEKHG5,PLEKHG5;PLEKHG5;PLEKHG5;PLEKHG5;PLEKHG5	NM_020631;NM_001042665;NM_198681;NM_001042664;NM_001042663,NM_020631;NM_001042665;NM_198681;NM_001042664;NM_001042663	hypoM.iPSC
1	6473660	6473692	2	cg10328583,cg05836788	5'UTR;Body;Body;TSS1500,5'UTR;Body;Body;TSS1500	Island,Island	PLEKHG5;PLEKHG5;PLEKHG5;PLEKHG5,PLEKHG5;PLEKHG5;PLEKHG5;PLEKHG5	NM_020631;NM_198681;NM_001042663;NM_001042664,NM_020631;NM_198681;NM_001042663;NM_001042664	hypoM.iPSC
1	6475814	6476097	2	cg19727124,cg21012139	Body;Body;TSS1500,Body;Body	S_Shelf,S_Shelf	PLEKHG5;PLEKHG5;PLEKHG5,PLEKHG5;PLEKHG5	NM_198681;NM_001042663;NM_020631,NM_198681;NM_001042663	hyperM.iPSC
1	6502424	6503112	2	cg04601090,cg06972903	5'UTR;1stExon,TSS1500	_,_	PLEKHG5;PLEKHG5,PLEKHG5	NM_198681;NM_198681,NM_198681	hyperM.iPSC
1	6537851	6538191	5	cg09132215,cg00741410,cg23963591,cg24105407,cg27531553	TSS200;TSS200;TSS200;TSS1500;TSS200,TSS200;TSS200;TSS200;TSS1500;TSS200,TSS200;TSS200;TSS200;TSS1500;TSS200,1stExon;1stExon;1stExon;TSS1500;1stExon,1stExon;1stExon;1stExon;TSS1500;1stExon	S_Shore,S_Shore,S_Shore,S_Shore,S_Shore	TAS1R1;TAS1R1;TAS1R1;NOL9;TAS1R1,TAS1R1;TAS1R1;TAS1R1;NOL9;TAS1R1,TAS1R1;TAS1R1;TAS1R1;NOL9;TAS1R1,TAS1R1;TAS1R1;TAS1R1;NOL9;TAS1R1,TAS1R1;TAS1R1;TAS1R1;NOL9;TAS1R1	NM_138697;NM_177539;NM_177540;NM_024654;NM_177541,NM_138697;NM_177539;NM_177540;NM_024654;NM_177541,NM_138697;NM_177539;NM_177540;NM_024654;NM_177541,NM_138697;NM_177539;NM_177540;NM_024654;NM_177541,NM_138697;NM_177539;NM_177540;NM_024654;NM_177541	hyperM.iPSC
1	6607506	6608583	4	cg11688219,cg24312985,cg17946470,cg08163621	TSS1500,TSS1500,Body,Body	N_Shore,N_Shore,S_Shore,S_Shore	THAP3,THAP3,THAP3,THAP3	NM_138350,NM_138350,NM_138350,NM_138350	hyperM.iPSC
1	6616918	6617143	3	cg12640387,cg20060759,cg16431369	3'UTR;3'UTR,3'UTR;3'UTR,3'UTR;3'UTR	_,_	THAP3;DNAJC11,THAP3;DNAJC11,THAP3;DNAJC11	NM_138350;NM_018198,NM_138350;NM_018198,NM_138350;NM_018198	hyperM.iPSC
1	6683513	6683562	2	cg26808478,cg21681377	Body,Body	N_Shore,N_Shore	DNAJC11,DNAJC11	NM_018198,NM_018198	hyperM.iPSC
1	6753559	6754306	2	cg26250086,cg16585946	_,_	_,_	_,_	_,_	hyperM.iPSC
1	7033771	7033823	2	cg17143900,cg07605269	Body,Body	_,_	CAMTA1,CAMTA1	NM_015215,NM_015215	hyperM.iPSC
1	7042691	7043480	2	cg05710479,cg06149271	Body,Body	N_Shelf,N_Shore	CAMTA1,CAMTA1	NM_015215,NM_015215	hyperM.iPSC
1	7107174	7107370	2	cg04980002,cg10332321	Body,Body	_,_	CAMTA1,CAMTA1	NM_015215,NM_015215	hyperM.iPSC
1	7132574	7133535	3	cg14836248,cg00833688,cg03765258	Body,Body,Body	_,_	CAMTA1,CAMTA1,CAMTA1	NM_015215,NM_015215,NM_015215	hyperM.iPSC
1	7230599	7230953	2	cg17079374,cg20800117	Body,Body	_,_	CAMTA1,CAMTA1	NM_015215,NM_015215	hyperM.iPSC
1	7330605	7331590	4	cg01550397,cg10626316,cg14794741,cg25345659	Body,Body,Body,Body	_,_	CAMTA1,CAMTA1,CAMTA1,CAMTA1	NM_015215,NM_015215,NM_015215,NM_015215	hyperM.iPSC
1	7454306	7454798	2	cg02275084,cg13202213	Body,Body	_,_	CAMTA1,CAMTA1	NM_015215,NM_015215	hyperM.iPSC
1	7461310	7461762	2	cg24634746,cg21583016	Body,Body	_,_	CAMTA1,CAMTA1	NM_015215,NM_015215	hyperM.iPSC
1	7579145	7579938	2	cg24851249,cg05048057	Body,Body	_,_	CAMTA1,CAMTA1	NM_015215,NM_015215	hyperM.iPSC
1	7614908	7614954	3	cg09889997,cg03762572,cg06800235	Body,Body,Body	_,_	CAMTA1,CAMTA1,CAMTA1	NM_015215,NM_015215,NM_015215	hyperM.iPSC
1	7719140	7720019	2	cg25132772,cg12138124	Body,Body	_,_	CAMTA1,CAMTA1	NM_015215,NM_015215	hyperM.iPSC
1	7767824	7768385	2	cg24454741,cg08134286	Body,Body	S_Shore,S_Shore	PER3,PER3	NM_016831,NM_016831	hyperM.iPSC
1	7836254	7836459	2	cg20625138,cg12606891	TSS1500;TSS200,TSS1500;TSS1500	_,_	UTS2;UTS2,UTS2;UTS2	NM_006786;NM_021995,NM_006786;NM_021995	hyperM.iPSC
1	7922901	7923633	3	cg08840010,cg14153654,cg18025409	5'UTR,TSS200,TSS200	N_Shelf,N_Shore,N_Shore	TNFRSF9,TNFRSF9,TNFRSF9	NM_001561,NM_001561,NM_001561	hyperM.iPSC
1	8010008	8010105	2	cg22678073,cg13808198	TSS1500,TSS1500	S_Shore,S_Shore	ERRFI1,ERRFI1	NM_018948,NM_018948	hypoM.iPSC
1	8104142	8104234	2	cg18376288,cg10227331	_,_	_,_	_,_	_,_	hyperM.iPSC
1	8194505	8194786	3	cg20014974,cg00590817,cg12700319	_,_	N_Shore,Island,Island	_,_	_,_	hyperM.iPSC
1	8265858	8266162	2	cg13089904,cg00059459	_,_	_,_	_,_	_,_	hyperM.iPSC
1	8285000	8285242	2	cg24453604,cg19243717	_,_	_,_	_,_	_,_	hyperM.iPSC
1	8326218	8326637	4	cg11189357,cg26411522,cg07123038,cg04994795	Body,Body,Body,Body	N_Shore,Island,Island,Island	SLC45A1,SLC45A1,SLC45A1,SLC45A1	NM_001080397,NM_001080397,NM_001080397,NM_001080397	hyperM.iPSC
1	8332689	8333661	2	cg11388228,cg13113737	_,_	_,_	_,_	_,_	hyperM.iPSC
1	8859664	8860035	2	cg25849281,cg06972019	5'UTR,5'UTR	N_Shore,N_Shore	ENO1,ENO1	NM_001428,NM_001428	hypoM.iPSC
1	8928306	8929267	3	cg00594907,cg02981703,cg25919221	TSS1500,TSS200,Body	_,_	CA6,CA6,CA6	NM_001215,NM_001215,NM_001215	hyperM.iPSC
1	8985484	8985518	2	cg00935435,cg24295324	_,_	_,_	_,_	_,_	hyperM.iPSC
1	9000941	9001064	2	cg04437482,cg07343511	Body,Body	_,_	SLC2A7,SLC2A7	NM_207420,NM_207420	hyperM.iPSC
1	9020009	9020622	2	cg07247610,cg00113315	3'UTR;Body,Body;Body	N_Shore,N_Shore	SLC2A5;SLC2A5,SLC2A5;SLC2A5	NM_003039;NR_024180,NM_003039;NR_024180	hyperM.iPSC
1	9021868	9023093	7	cg02497830,cg04885068,cg26032244,cg09859080,cg15545739,cg18731519,cg24552773	Body;Body,Body;Body,Body;Body,Body;Body,Body;Body,Body;Body,Body;Body	Island,Island,Island,Island,Island,Island,Island	SLC2A5;SLC2A5,SLC2A5;SLC2A5,SLC2A5;SLC2A5,SLC2A5;SLC2A5,SLC2A5;SLC2A5,SLC2A5;SLC2A5,SLC2A5;SLC2A5	NM_003039;NR_024180,NM_003039;NR_024180,NM_003039;NR_024180,NM_003039;NR_024180,NM_003039;NR_024180,NM_003039;NR_024180,NM_003039;NR_024180	hyperM.iPSC
1	9052074	9052378	3	cg03679305,cg00310940,cg24480859	Body;Body;Body,5'UTR;5'UTR;1stExon;1stExon;Body,5'UTR;5'UTR;1stExon;1stExon;Body	N_Shelf,N_Shore,N_Shore	SLC2A5;SLC2A5;SLC2A5,SLC2A5;SLC2A5;SLC2A5;SLC2A5;SLC2A5,SLC2A5;SLC2A5;SLC2A5;SLC2A5;SLC2A5	NM_003039;NM_001135585;NR_024180,NM_003039;NM_001135585;NM_003039;NM_001135585;NR_024180,NM_003039;NM_001135585;NM_003039;NM_001135585;NR_024180	hyperM.iPSC
1	9071613	9072321	2	cg23737366,cg16104584	TSS1500,TSS1500	_,_	SLC2A5,SLC2A5	NR_024180,NR_024180	hyperM.iPSC
1	9134423	9135108	3	cg00909706,cg09994773,cg04329551	TSS200,TSS1500,TSS1500	_,_	MIR34A,MIR34A,MIR34A	NR_029610,NR_029610,NR_029610	hyperM.iPSC
1	9146590	9146963	3	cg10377510,cg22373770,cg16102739	_,_	_,_	_,_	_,_	hyperM.iPSC
1	9263003	9263728	4	cg01102307,cg16411216,cg09869882,cg16162930	_,_	_,_	_,_	_,_	hyperM.iPSC
1	9298214	9298626	2	cg06779253,cg17489312	5'UTR,5'UTR	_,_	SPSB1,SPSB1	NM_025106,NM_025106	hyperM.iPSC
1	9323279	9323362	3	cg13197521,cg04778236,cg24597774	5'UTR,5'UTR,5'UTR	_,_	SPSB1,SPSB1,SPSB1	NM_025106,NM_025106,NM_025106	hyperM.iPSC
1	9331936	9332920	2	cg25616787,cg07173218	5'UTR,5'UTR	_,_	SPSB1,SPSB1	NM_025106,NM_025106	hyperM.iPSC
1	9382791	9383417	2	cg04972459,cg01806956	_,_	_,_	_,_	_,_	hyperM.iPSC
1	9411293	9412021	2	cg03605773,cg03003073	_,_	N_Shore,S_Shore	_,_	_,_	hyperM.iPSC
1	9586792	9586921	2	cg15685988,cg14258107	Body;3'UTR,Body;3'UTR	_,_	TMEM201;TMEM201,TMEM201;TMEM201	NM_001130924;NM_001010866,NM_001130924;NM_001010866	hyperM.iPSC
1	9609110	9610058	2	cg17467525,cg16014412	_,_	N_Shore,S_Shore	_,_	_,_	hyperM.iPSC
1	9635515	9637397	6	cg10050900,cg07793148,cg18284427,cg00231528,cg08854008,cg12354861	Body;5'UTR,Body;5'UTR,Body;5'UTR,Body;5'UTR,Body;5'UTR,TSS200;5'UTR	Island,Island,S_Shore,S_Shore,S_Shore,S_Shore	C1orf200;PIK3CD,C1orf200;PIK3CD,C1orf200;PIK3CD,C1orf200;PIK3CD,C1orf200;PIK3CD,C1orf200;PIK3CD	NR_027045;NM_005026,NR_027045;NM_005026,NR_027045;NM_005026,NR_027045;NM_005026,NR_027045;NM_005026,NR_027045;NM_005026	hyperM.iPSC
1	10412612	10412823	5	cg09242541,cg05038881,cg13803915,cg15494174,cg09578353	TSS200;TSS1500;TSS200,TSS200;TSS1500;TSS200,TSS200;TSS1500;TSS200,TSS200;TSS1500;TSS200,5'UTR;1stExon;5'UTR;TSS1500;1stExon	N_Shore,N_Shore,N_Shore,N_Shore,Island	APITD1;APITD1;APITD1,APITD1;APITD1;APITD1,APITD1;APITD1;APITD1,APITD1;APITD1;APITD1,APITD1;APITD1;APITD1;APITD1;APITD1	NM_198544;NM_199295;NM_199294,NM_198544;NM_199295;NM_199294,NM_198544;NM_199295;NM_199294,NM_198544;NM_199295;NM_199294,NM_199294;NM_199294;NM_198544;NM_199295;NM_198544	hyperM.iPSC
1	10433554	10434380	2	cg12464625,cg24293507	Body;Body,3'UTR;3'UTR	_,_	CORT;APITD1,APITD1;CORT	NM_001302;NM_198544,NM_198544;NM_001302	hyperM.iPSC
1	10513068	10513259	2	cg10777461,cg22515654	Body,Body	_,_	PEX14,PEX14	NM_004565,NM_004565	hypoM.iPSC
1	10523976	10524420	4	cg12806121,cg09165170,cg00804803,cg24294013	Body,Body,Body,Body	_,_	PEX14,PEX14,PEX14,PEX14	NM_004565,NM_004565,NM_004565,NM_004565	hypoM.iPSC
1	10618273	10618653	3	cg01556552,cg20329303,cg07555102	_,_	N_Shelf,N_Shelf,N_Shelf	_,_	_,_	hyperM.iPSC
1	10620290	10620900	2	cg00145904,cg20704560	3'UTR,3'UTR	N_Shore,Island	CASZ1,CASZ1	NM_001079843,NM_001079843	hyperM.iPSC
1	10629071	10630041	2	cg19403943,cg07974958	Body,3'UTR;Body	N_Shore,N_Shore	CASZ1,CASZ1;CASZ1	NM_001079843,NM_017766;NM_001079843	hyperM.iPSC
1	10636531	10637206	2	cg26427827,cg13486959	Body;Body,Body;Body	Island,Island	CASZ1;CASZ1,CASZ1;CASZ1	NM_017766;NM_001079843,NM_017766;NM_001079843	hyperM.iPSC
1	10638277	10638472	2	cg10062187,cg11800379	Body;Body,Body;Body	S_Shore,S_Shore	CASZ1;CASZ1,CASZ1;CASZ1	NM_017766;NM_001079843,NM_017766;NM_001079843	hyperM.iPSC
1	10642856	10643580	3	cg04022560,cg01934856,cg13114836	Body;Body,Body;Body,Body;Body	Island,Island,S_Shore	CASZ1;CASZ1,CASZ1;CASZ1,CASZ1;CASZ1	NM_017766;NM_001079843,NM_017766;NM_001079843,NM_017766;NM_001079843	hyperM.iPSC
1	10645761	10646217	2	cg15490335,cg15031409	Body;Body,Body;Body	N_Shelf,N_Shore	CASZ1;CASZ1,CASZ1;CASZ1	NM_017766;NM_001079843,NM_017766;NM_001079843	hyperM.iPSC
1	10650857	10651803	2	cg01515508,cg12631000	Body;Body,Body;Body	S_Shelf,S_Shelf	CASZ1;CASZ1,CASZ1;CASZ1	NM_017766;NM_001079843,NM_017766;NM_001079843	hyperM.iPSC
1	10655051	10657756	10	cg16926809,cg11222217,cg00925802,cg13840252,cg22853713,cg09179249,cg01399485,cg02342906,cg14206273,cg20288000	Body;Body,Body;Body,Body;Body,Body;Body,Body;Body,Body;Body,Body;Body,Body;Body,Body;Body,Body;Body	_,_	CASZ1;CASZ1,CASZ1;CASZ1,CASZ1;CASZ1,CASZ1;CASZ1,CASZ1;CASZ1,CASZ1;CASZ1,CASZ1;CASZ1,CASZ1;CASZ1,CASZ1;CASZ1,CASZ1;CASZ1	NM_017766;NM_001079843,NM_017766;NM_001079843,NM_017766;NM_001079843,NM_017766;NM_001079843,NM_017766;NM_001079843,NM_017766;NM_001079843,NM_017766;NM_001079843,NM_017766;NM_001079843,NM_017766;NM_001079843,NM_017766;NM_001079843	hyperM.iPSC
1	10687099	10687483	2	cg07589381,cg04149978	5'UTR;5'UTR,5'UTR;5'UTR	Island,Island	CASZ1;CASZ1,CASZ1;CASZ1	NM_001079843;NM_017766,NM_001079843;NM_017766	hypoM.iPSC
1	10711388	10711515	2	cg10234511,cg18437144	5'UTR;5'UTR,5'UTR;5'UTR	_,_	CASZ1;CASZ1,CASZ1;CASZ1	NM_001079843;NM_017766,NM_001079843;NM_017766	hypoM.iPSC
1	10718998	10719410	2	cg12796481,cg15622917	5'UTR;5'UTR,5'UTR;5'UTR	_,_	CASZ1;CASZ1,CASZ1;CASZ1	NM_001079843;NM_017766,NM_001079843;NM_017766	hyperM.iPSC
1	10738109	10739086	2	cg01973605,cg00003345	5'UTR;5'UTR,5'UTR;5'UTR	_,_	CASZ1;CASZ1,CASZ1;CASZ1	NM_001079843;NM_017766,NM_001079843;NM_017766	hyperM.iPSC
1	10762037	10762161	2	cg26522708,cg25463742	5'UTR;5'UTR,5'UTR;5'UTR	_,_	CASZ1;CASZ1,CASZ1;CASZ1	NM_001079843;NM_017766,NM_001079843;NM_017766	hyperM.iPSC
1	10770128	10770181	2	cg04842880,cg04622001	5'UTR;5'UTR,5'UTR;5'UTR	_,_	CASZ1;CASZ1,CASZ1;CASZ1	NM_001079843;NM_017766,NM_001079843;NM_017766	hyperM.iPSC
1	10818565	10818591	2	cg09510180,cg00944431	_,_	Island,Island	_,_	_,_	hypoM.iPSC
1	10839978	10840038	2	cg26027690,cg04117764	_,_	_,_	_,_	_,_	hyperM.iPSC
1	10946343	10947850	4	cg05352668,cg11349878,cg05655022,cg18285377	Body;Body,1stExon;Body,TSS1500;Body,TSS1500;Body	_,_	C1orf127;C1orf127,C1orf127;C1orf127,C1orf127;C1orf127,C1orf127;C1orf127	NM_001170754;NM_173507,NM_173507;NM_001170754,NM_173507;NM_001170754,NM_173507;NM_001170754	hyperM.iPSC
1	11029893	11029971	2	cg20817175,cg18023080	TSS200;TSS200,TSS200;TSS200	_,_	MASP2;MASP2,MASP2;MASP2	NM_006610;NM_139208,NM_006610;NM_139208	hyperM.iPSC
1	11035563	11035667	2	cg18947360,cg14853169	_,_	_,_	_,_	_,_	hyperM.iPSC
1	11041467	11041476	2	cg05644049,cg19757631	Body,Body	N_Shore,N_Shore	SRM,SRM	NM_003132,NM_003132	hyperM.iPSC
1	11104681	11104740	2	cg00909226,cg15725046	Body,Body	_,_	MTOR,MTOR	NM_004958,NM_004958	hyperM.iPSC
1	11482569	11482961	2	cg23589174,cg14966878	5'UTR,5'UTR	N_Shore,N_Shore	PTCHD2,PTCHD2	NM_020780,NM_020780	hyperM.iPSC
1	11484084	11485512	7	cg24371425,cg08243619,cg10116490,cg13863764,cg09573658,cg16138910,cg09265940	Body,Body,Body,Body,Body,Body,Body	Island,Island,Island,Island,Island,Island,S_Shore	PTCHD2,PTCHD2,PTCHD2,PTCHD2,PTCHD2,PTCHD2,PTCHD2	NM_020780,NM_020780,NM_020780,NM_020780,NM_020780,NM_020780,NM_020780	hyperM.iPSC
1	11512073	11512630	4	cg00857963,cg27426340,cg26258588,cg18818484	Body,Body,Body,Body	N_Shore,Island,Island,Island	PTCHD2,PTCHD2,PTCHD2,PTCHD2	NM_020780,NM_020780,NM_020780,NM_020780	hyperM.iPSC
1	11516514	11517199	2	cg06951112,cg09790470	Body,Body	N_Shelf,N_Shore	PTCHD2,PTCHD2	NM_020780,NM_020780	hyperM.iPSC
1	11519021	11519537	3	cg25287708,cg09910984,cg26367275	Body,Body,3'UTR	Island,Island,S_Shore	PTCHD2,PTCHD2,PTCHD2	NM_020780,NM_020780,NM_020780	hyperM.iPSC
1	11630879	11631858	4	cg11659361,cg24878594,cg13986670,cg18792022	_,3'UTR,Body,Body	N_Shore,N_Shore,Island,Island	_,FBXO2,FBXO2,FBXO2	_,NM_012168,NM_012168,NM_012168	hyperM.iPSC
1	11636230	11636841	4	cg19747992,cg05796704,cg22697136,cg01420388	TSS1500;Body;TSS1500;TSS1500;TSS1500,TSS1500;Body;TSS1500;TSS1500;TSS1500,TSS1500;Body;TSS1500;TSS200;TSS1500,TSS1500;Body;TSS1500;TSS200;TSS1500	N_Shore,Island,Island,Island	FBXO44;FBXO2;FBXO44;FBXO44;FBXO44,FBXO44;FBXO2;FBXO44;FBXO44;FBXO44,FBXO44;FBXO2;FBXO44;FBXO44;FBXO44,FBXO44;FBXO2;FBXO44;FBXO44;FBXO44	NM_183413;NM_012168;NM_183412;NM_033182;NM_001014765,NM_183413;NM_012168;NM_183412;NM_033182;NM_001014765,NM_183413;NM_012168;NM_033182;NM_183412;NM_001014765,NM_183413;NM_012168;NM_033182;NM_183412;NM_001014765	hypoM.iPSC
1	11646727	11647530	2	cg19741456,cg24881202	TSS200,5'UTR	Island,S_Shore	FBXO6,FBXO6	NM_018438,NM_018438	hyperM.iPSC
1	11663095	11663252	2	cg24718367,cg17189494	Body;Body,5'UTR;5'UTR	N_Shore,N_Shore	MAD2L2;MAD2L2,MAD2L2;MAD2L2	NM_006341;NM_001127325,NM_001127325;NM_006341	hyperM.iPSC
1	11683443	11684353	4	cg05782377,cg16020346,cg13569079,cg20946054	5'UTR,5'UTR,5'UTR,5'UTR	_,_	C1orf187,C1orf187,C1orf187,C1orf187	NM_198545,NM_198545,NM_198545,NM_198545	hyperM.iPSC
1	11701913	11702843	4	cg26437845,cg24724832,cg21106899,cg14262374	Body,Body,3'UTR,3'UTR	N_Shore,N_Shore,Island,S_Shore	C1orf187,C1orf187,C1orf187,C1orf187	NM_198545,NM_198545,NM_198545,NM_198545	hyperM.iPSC
1	11717996	11718484	2	cg18327319,cg08425760	TSS1500;TSS1500;TSS1500;TSS1500;TSS1500,TSS1500;TSS1500;TSS1500;TSS1500;TSS1500	N_Shore,N_Shore	AGTRAP;AGTRAP;AGTRAP;AGTRAP;AGTRAP,AGTRAP;AGTRAP;AGTRAP;AGTRAP;AGTRAP	NM_001040194;NM_001040197;NM_001040195;NM_001040196;NM_020350,NM_001040194;NM_001040197;NM_001040195;NM_001040196;NM_020350	hyperM.iPSC
1	11769754	11770450	2	cg22877851,cg21864959	3'UTR,3'UTR	_,_	MTHFR,MTHFR	NM_005957,NM_005957	hyperM.iPSC
1	11820218	11820992	2	cg21147983,cg27058244	Body,Body	N_Shore,Island	CLCN6,CLCN6	NM_001286,NM_001286	hyperM.iPSC
1	11828453	11828774	2	cg02847674,cg09581756	3'UTR,Body	_,_	NPPA,NPPA	NM_006172,NM_006172	hyperM.iPSC
1	11829911	11830934	7	cg06584407,cg20202438,cg25341925,cg05396397,cg06193043,cg14194983,cg24844545	Body,TSS200,TSS1500,TSS1500,TSS1500,TSS1500,TSS1500	_,_	NPPA,NPPA,NPPA,NPPA,NPPA,NPPA,NPPA	NM_006172,NM_006172,NM_006172,NM_006172,NM_006172,NM_006172,NM_006172	hyperM.iPSC
1	11841394	11841682	3	cg24697075,cg26614504,cg13885623	1stExon,TSS200,TSS200	N_Shore,N_Shore,N_Shore	NPPB,NPPB,NPPB	NM_002521,NM_002521,NM_002521	hyperM.iPSC
1	11909321	11909429	2	cg22932223,cg07603449	TSS1500,TSS1500	S_Shore,S_Shore	KIAA2013,KIAA2013	NM_138346,NM_138346	hyperM.iPSC
1	11916868	11917677	5	cg03529003,cg11469137,cg26145832,cg05132283,cg23286660	TSS1500,TSS1500,TSS1500,TSS1500,Body	N_Shore,N_Shore,N_Shore,N_Shore,S_Shore	PLOD1,PLOD1,PLOD1,PLOD1,PLOD1	NM_000302,NM_000302,NM_000302,NM_000302,NM_000302	hyperM.iPSC
1	12050687	12051414	2	cg24427243,cg22428027	Body,Body	S_Shelf,_	TNFRSF8,TNFRSF8	NM_001243,NM_001243	hyperM.iPSC
1	12107128	12107622	3	cg14712983,cg20978923,cg16575981	Body;TSS1500,Body;TSS1500,Body;TSS1500	_,_	TNFRSF8;TNFRSF8,TNFRSF8;TNFRSF8,TNFRSF8;TNFRSF8	NM_001243;NM_152942,NM_001243;NM_152942,NM_001243;NM_152942	hyperM.iPSC
1	12126158	12126683	3	cg09247175,cg24492058,cg06853894	3'UTR;3'UTR,3'UTR;3'UTR,3'UTR;3'UTR	_,_	TNFRSF8;TNFRSF8,TNFRSF8;TNFRSF8,TNFRSF8;TNFRSF8	NM_001243;NM_152942,NM_001243;NM_152942,NM_001243;NM_152942	hyperM.iPSC
1	12150004	12150514	4	cg22337605,cg26189983,cg00155063,cg09557991	Body,Body,Body,Body	Island,Island,S_Shore,S_Shore	TNFRSF1B,TNFRSF1B,TNFRSF1B,TNFRSF1B	NM_001066,NM_001066,NM_001066,NM_001066	hyperM.iPSC
1	12160977	12161133	2	cg22677556,cg15526535	Body,Body	_,_	TNFRSF1B,TNFRSF1B	NM_001066,NM_001066	hyperM.iPSC
1	12174305	12174521	4	cg01250490,cg15622556,cg06740893,cg03129172	Body,Body,Body,Body	N_Shore,Island,Island,Island	TNFRSF1B,TNFRSF1B,TNFRSF1B,TNFRSF1B	NM_001066,NM_001066,NM_001066,NM_001066	hyperM.iPSC
1	12193362	12193474	2	cg23843705,cg08531380	_,_	_,_	_,_	_,_	hyperM.iPSC
1	12213227	12213926	2	cg11726754,cg00384847	5'UTR;5'UTR,5'UTR;5'UTR	N_Shore,S_Shore	VPS13D;VPS13D,VPS13D;VPS13D	NM_018156;NM_015378,NM_018156;NM_015378	hyperM.iPSC
1	12460928	12461265	3	cg11217193,cg13466988,cg05654304	Body;Body,Body;Body,Body;Body	_,_	VPS13D;VPS13D,VPS13D;VPS13D,VPS13D;VPS13D	NM_015378;NM_018156,NM_015378;NM_018156,NM_015378;NM_018156	hyperM.iPSC
1	12493282	12494212	2	cg10798815,cg05756685	3'UTR;3'UTR,3'UTR;3'UTR	_,_	VPS13D;VPS13D,VPS13D;VPS13D	NM_018156;NM_015378,NM_018156;NM_015378	hyperM.iPSC
1	12532292	12532544	2	cg04943879,cg01017395	_,_	_,_	_,_	_,_	hyperM.iPSC
1	12601228	12601348	2	cg17935811,cg01346152	TSS1500,TSS1500	Island,S_Shore	DHRS3,DHRS3	NM_004753,NM_004753	hypoM.iPSC
1	12626451	12626594	3	cg11157076,cg09518518,cg06751920	TSS1500,TSS1500,TSS1500	_,_	AADACL4,AADACL4,AADACL4	NM_001013630,NM_001013630,NM_001013630	hyperM.iPSC
1	12697402	12697491	2	cg04505750,cg19620994	TSS1500;TSS1500,TSS1500;TSS1500	_,_	AADACL3;AADACL3,AADACL3;AADACL3	NM_001103170;NM_001103169,NM_001103170;NM_001103169	hyperM.iPSC
1	12698747	12698793	2	cg00254956,cg12639866	5'UTR;5'UTR;1stExon;1stExon,5'UTR;5'UTR;1stExon;1stExon	_,_	AADACL3;AADACL3;AADACL3;AADACL3,AADACL3;AADACL3;AADACL3;AADACL3	NM_001103170;NM_001103169;NM_001103169;NM_001103170,NM_001103170;NM_001103169;NM_001103169;NM_001103170	hyperM.iPSC
1	12756331	12757832	3	cg11346333,cg11737871,cg13394110	TSS1500,TSS1500,1stExon	_,_	PRAMEF12,PRAMEF12,PRAMEF12	NM_001080830,NM_001080830,NM_001080830	hyperM.iPSC
1	13759290	13759442	2	cg17840367,cg11677705	_,_	_,_	_,_	_,_	hyperM.iPSC
1	13781748	13782408	5	cg23954416,cg16590190,cg00831909,cg22798977,cg25286482	TSS1500;TSS1500,TSS1500;TSS1500,TSS1500;TSS1500,TSS1500;TSS1500,TSS1500;TSS1500	N_Shore,N_Shore,Island,Island,Island	PDPN;PDPN,PDPN;PDPN,PDPN;PDPN,PDPN;PDPN,PDPN;PDPN	NM_006474;NM_198389,NM_006474;NM_198389,NM_006474;NM_198389,NM_006474;NM_198389,NM_006474;NM_198389	hypoM.iPSC
1	13898724	13898947	2	cg19300923,cg11344626	TSS1500,TSS1500	N_Shore,N_Shore	PRDM2,PRDM2	NM_001135610,NM_001135610	hyperM.iPSC
1	13900108	13900168	3	cg24550112,cg16680547,cg26608693	5'UTR,5'UTR,5'UTR	S_Shore,S_Shore,S_Shore	PRDM2,PRDM2,PRDM2	NM_001135610,NM_001135610,NM_001135610	hyperM.iPSC
1	14092852	14093201	2	cg08482465,cg19621427	_,_	S_Shore,S_Shore	_,_	_,_	hyperM.iPSC
1	14570176	14571005	2	cg27573298,cg22693638	_,_	_,_	_,_	_,_	hyperM.iPSC
1	14796664	14797198	2	cg11964773,cg12873454	TSS1500;TSS1500,TSS1500;TSS1500	N_Shore,Island	KIAA1026;KIAA1026,KIAA1026;KIAA1026	NM_015209;NM_201628,NM_015209;NM_201628	hypoM.iPSC
1	15047791	15047943	3	cg22723001,cg15733729,cg02232840	Body;Body,Body;Body,Body;Body	_,_	KIAA1026;KIAA1026,KIAA1026;KIAA1026,KIAA1026;KIAA1026	NM_201628;NM_015209,NM_201628;NM_015209,NM_201628;NM_015209	hyperM.iPSC
1	15128714	15128809	3	cg19520372,cg13239126,cg19710662	Body;TSS200;Body;Body,Body;TSS200;Body;Body,Body;TSS200;Body;Body	_,_	KIAA1026;KIAA1026;KIAA1026;KIAA1026,KIAA1026;KIAA1026;KIAA1026;KIAA1026,KIAA1026;KIAA1026;KIAA1026;KIAA1026	NM_201628;NM_001018001;NM_015209;NM_001018000,NM_201628;NM_001018001;NM_015209;NM_001018000,NM_201628;NM_001018001;NM_015209;NM_001018000	hyperM.iPSC
1	15144669	15144913	4	cg03398002,cg16663033,cg11648522,cg26577320	Body;5'UTR;TSS1500;Body;Body,Body;5'UTR;TSS1500;Body;Body,TSS200;Body;5'UTR;Body;Body,TSS200;Body;5'UTR;Body;Body	_,_	KIAA1026;KIAA1026;KIAA1026;KIAA1026;KIAA1026,KIAA1026;KIAA1026;KIAA1026;KIAA1026;KIAA1026,KIAA1026;KIAA1026;KIAA1026;KIAA1026;KIAA1026,KIAA1026;KIAA1026;KIAA1026;KIAA1026;KIAA1026	NM_201628;NM_001018001;NM_001017999;NM_015209;NM_001018000,NM_201628;NM_001018001;NM_001017999;NM_015209;NM_001018000,NM_001017999;NM_201628;NM_001018001;NM_015209;NM_001018000,NM_001017999;NM_201628;NM_001018001;NM_015209;NM_001018000	hyperM.iPSC
1	15350793	15351205	2	cg20746795,cg22453656	TSS1500;TSS1500;Body,TSS1500;TSS1500;Body	N_Shore,N_Shore	TMEM51;TMEM51;C1orf126,TMEM51;TMEM51;C1orf126	NM_001136216;NM_001136217;NR_027136,NM_001136216;NM_001136217;NR_027136	hyperM.iPSC
1	15413769	15414386	5	cg21005438,cg11741753,cg19505659,cg26027853,cg13878066	5'UTR;5'UTR;5'UTR;5'UTR,5'UTR;5'UTR;5'UTR;5'UTR,5'UTR;5'UTR;5'UTR;5'UTR,5'UTR;5'UTR;5'UTR;5'UTR,Body;Body;Body;Body	Island,Island,Island,Island,S_Shore	TMEM51;TMEM51;TMEM51;TMEM51,TMEM51;TMEM51;TMEM51;TMEM51,TMEM51;TMEM51;TMEM51;TMEM51,TMEM51;TMEM51;TMEM51;TMEM51,TMEM51;TMEM51;TMEM51;TMEM51	NM_001136218;NM_018022;NM_001136216;NM_001136217,NM_001136218;NM_018022;NM_001136216;NM_001136217,NM_001136218;NM_018022;NM_001136216;NM_001136217,NM_001136218;NM_018022;NM_001136216;NM_001136217,NM_001136217;NM_001136218;NM_001136216;NM_018022	hyperM.iPSC
1	15522855	15523035	2	cg10515414,cg10055277	Body,Body	_,_	FHAD1,FHAD1	NM_052929,NM_052929	hyperM.iPSC
1	15528351	15528673	3	cg00702647,cg09252331,cg07312051	Body,Body,Body	_,_	FHAD1,FHAD1,FHAD1	NM_052929,NM_052929,NM_052929	hyperM.iPSC
1	15584030	15584606	2	cg00970752,cg11395890	Body,Body	_,_	FHAD1,FHAD1	NM_052929,NM_052929	hypoM.iPSC
1	15606431	15606872	2	cg03048488,cg27582527	_,_	N_Shelf,N_Shore	_,_	_,_	hyperM.iPSC
1	15674530	15675181	2	cg19505194,cg25021182	TSS1500,TSS200	_,_	CELA2B,CELA2B	NM_015849,NM_015849	hyperM.iPSC
1	15802368	15802973	5	cg13390004,cg24675056,cg01769457,cg15036616,cg19699088	_,_	N_Shore,Island,Island,Island,S_Shore	_,_	_,_	hyperM.iPSC
1	15930616	15931091	2	cg26797159,cg03339674	Body,Body	N_Shore,Island	PLEKHM2,PLEKHM2	NM_015164,NM_015164	hyperM.iPSC
1	15934948	15936058	7	cg05337019,cg16713727,cg06761377,cg15616400,cg03970032,cg26923754,cg21821674	TSS1500,TSS200,TSS200,5'UTR;1stExon,5'UTR;1stExon,1stExon,Body	S_Shelf,_	SLC25A34,SLC25A34,SLC25A34,SLC25A34;SLC25A34,SLC25A34;SLC25A34,SLC25A34,SLC25A34	NM_207348,NM_207348,NM_207348,NM_207348;NM_207348,NM_207348;NM_207348,NM_207348,NM_207348	hyperM.iPSC
1	15943216	15943926	3	cg01963294,cg08029920,cg26049379	Body,Body,Body	Island,Island,N_Shore	TMEM82,TMEM82,TMEM82	NM_001013641,NM_001013641,NM_001013641	hyperM.iPSC
1	15963687	15963736	2	cg06747907,cg12068257	5'UTR;5'UTR;TSS1500;1stExon,5'UTR;5'UTR;TSS1500;1stExon	_,_	FBLIM1;FBLIM1;FBLIM1;FBLIM1,FBLIM1;FBLIM1;FBLIM1;FBLIM1	NM_001024215;NM_017556;NM_001024216;NM_001024215,NM_001024215;NM_017556;NM_001024216;NM_001024215	hyperM.iPSC
1	16036554	16036709	2	cg25980637,cg18973939	Body,Body	Island,Island	FLJ37453,FLJ37453	NR_024279,NR_024279	hyperM.iPSC
1	16148126	16148881	2	cg26334507,cg18147543	5'UTR,5'UTR	S_Shelf,_	ZBTB17,ZBTB17	NM_003443,NM_003443	hyperM.iPSC
1	16216343	16219021	10	cg11421972,cg21214613,cg02890259,cg09858176,cg13081498,cg13320181,cg24306962,cg03260781,cg00261668,cg06521827	Body,1stExon;5'UTR,1stExon;5'UTR,TSS200,TSS200,TSS200,TSS1500,TSS1500,TSS1500,TSS1500	_,_	HSPB7,HSPB7;HSPB7,HSPB7;HSPB7,HSPB7,HSPB7,HSPB7,HSPB7,HSPB7,HSPB7,HSPB7	NM_014424,NM_014424;NM_014424,NM_014424;NM_014424,NM_014424,NM_014424,NM_014424,NM_014424,NM_014424,NM_014424,NM_014424	hyperM.iPSC
1	16220571	16220582	2	cg11528029,cg16591681	TSS1500;TSS1500,TSS1500;TSS1500	_,_	CLCNKA;CLCNKA,CLCNKA;CLCNKA	NM_004070;NM_001042704,NM_004070;NM_001042704	hyperM.iPSC
1	16242785	16242804	2	cg09413450,cg12218389	TSS200,TSS200	_,_	CLCNKB,CLCNKB	NM_000085,NM_000085	hyperM.iPSC
1	16273252	16273469	3	cg25851313,cg03466522,cg22852013	TSS1500,TSS1500,TSS1500	S_Shore,S_Shore,S_Shore	FAM131C,FAM131C,FAM131C	NM_182623,NM_182623,NM_182623	hypoM.iPSC
1	16355354	16355405	2	cg15146752,cg09178261	TSS1500,TSS1500	Island,S_Shore	EPHA2,EPHA2	NM_004431,NM_004431	hypoM.iPSC
1	16361635	16361702	2	cg07146104,cg23072161	_,_	_,_	_,_	_,_	hypoM.iPSC
1	16406870	16407166	2	cg14138287,cg00521428	Body,Body	Island,Island	ARHGEF19,ARHGEF19	NM_153213,NM_153213	hyperM.iPSC
1	16411600	16411675	2	cg25220781,cg18669381	5'UTR;1stExon,5'UTR;1stExon	_,_	ARHGEF19;ARHGEF19,ARHGEF19;ARHGEF19	NM_153213;NM_153213,NM_153213;NM_153213	hypoM.iPSC
1	16426989	16427571	4	cg17463745,cg16312002,cg07781491,cg11211795	_,_	S_Shore,S_Shore,S_Shore,S_Shore	_,_	_,_	hypoM.iPSC
1	16636726	16637547	3	cg23213892,cg20815571,cg00694324	TSS1500,TSS1500,TSS1500	N_Shelf,N_Shelf,N_Shelf	SPATA21,SPATA21,SPATA21	NM_198546,NM_198546,NM_198546	hyperM.iPSC
1	16639205	16639597	2	cg13864749,cg26348575	TSS1500;TSS1500;TSS1500,TSS200;TSS200;TSS200	N_Shore,Island	NECAP2;NECAP2;NECAP2,NECAP2;NECAP2;NECAP2	NM_001145277;NM_001145278;NM_018090,NM_001145277;NM_001145278;NM_018090	hyperM.iPSC
1	16640749	16640782	2	cg07121795,cg03920729	Body;Body;Body,Body;Body;Body	S_Shore,S_Shore	NECAP2;NECAP2;NECAP2,NECAP2;NECAP2;NECAP2	NM_018090;NM_001145277;NM_001145278,NM_018090;NM_001145277;NM_001145278	hyperM.iPSC
1	16683257	16683264	2	cg07021523,cg09883381	Body,Body	Island,Island	CROCCL2,CROCCL2	NR_023386,NR_023386	hypoM.iPSC
1	16816430	16816466	2	cg10096008,cg11650858	_,_	S_Shelf,S_Shelf	_,_	_,_	hyperM.iPSC
1	16830844	16831051	2	cg18895859,cg22732055	TSS1500,TSS1500	_,_	CROCCL1,CROCCL1	NR_026752,NR_026752	hyperM.iPSC
1	16891174	16892971	4	cg14995274,cg25196716,cg07311615,cg15629460	Body,Body,Body,Body	N_Shore,Island,Island,Island	ESPNP,ESPNP,ESPNP,ESPNP	NR_026567,NR_026567,NR_026567,NR_026567	hyperM.iPSC
1	16964533	16964562	2	cg04362112,cg17140381	TSS1500,TSS1500	_,_	MST1P9,MST1P9	NR_002729,NR_002729	hyperM.iPSC
1	17120637	17121033	3	cg21807694,cg19368145,cg21863946	TSS1500,TSS200,5'UTR;1stExon	_,_	CROCC,CROCC,CROCC;CROCC	NM_014675,NM_014675,NM_014675;NM_014675	hypoM.iPSC
1	17137826	17138044	2	cg13678243,cg18862597	Body,Body	_,_	CROCC,CROCC	NM_014675,NM_014675	hypoM.iPSC
1	17159792	17160088	3	cg22050733,cg07981980,cg14973240	Body,Body,Body	N_Shore,Island,Island	CROCC,CROCC,CROCC	NM_014675,NM_014675,NM_014675	hyperM.iPSC
1	17165842	17166558	2	ch.1.587982R,cg06911110	Body,Body	S_Shore,S_Shore	CROCC,CROCC	NM_014675,NM_014675	hyperM.iPSC
1	17175446	17176339	2	cg21304454,cg00031063	Body;Body;Body;Body,Body;Body;Body;Body	N_Shelf,N_Shelf	MFAP2;MFAP2;MFAP2;MFAP2,MFAP2;MFAP2;MFAP2;MFAP2	NM_017459;NM_001135248;NM_002403;NM_001135247,NM_017459;NM_001135248;NM_002403;NM_001135247	hyperM.iPSC
1	17178149	17178385	2	cg04875062,cg04236263	5'UTR;5'UTR;5'UTR;5'UTR,5'UTR;5'UTR;5'UTR;5'UTR	N_Shore,N_Shore	MFAP2;MFAP2;MFAP2;MFAP2,MFAP2;MFAP2;MFAP2;MFAP2	NM_001135248;NM_017459;NM_001135247;NM_002403,NM_001135248;NM_017459;NM_001135247;NM_002403	hyperM.iPSC
1	17180265	17180793	5	cg03394122,cg08477744,cg12695612,cg17744878,cg19306948	TSS1500;5'UTR;5'UTR;TSS1500,TSS1500;5'UTR;1stExon;1stExon;5'UTR;TSS1500,TSS1500;TSS200;TSS200;TSS1500,TSS1500;TSS200;TSS200;TSS1500,TSS1500;TSS200;TSS200;TSS1500	S_Shore,S_Shore,S_Shore,S_Shore,S_Shore	MFAP2;MFAP2;MFAP2;MFAP2,MFAP2;MFAP2;MFAP2;MFAP2;MFAP2;MFAP2,MFAP2;MFAP2;MFAP2;MFAP2,MFAP2;MFAP2;MFAP2;MFAP2,MFAP2;MFAP2;MFAP2;MFAP2	NM_002403;NM_017459;NM_001135247;NM_001135248,NM_002403;NM_017459;NM_001135247;NM_017459;NM_001135247;NM_001135248,NM_002403;NM_001135247;NM_017459;NM_001135248,NM_002403;NM_001135247;NM_017459;NM_001135248,NM_002403;NM_001135247;NM_017459;NM_001135248	hyperM.iPSC
1	17211231	17211353	2	cg11192270,cg20822990	TSS1500;TSS1500;TSS1500,TSS1500;TSS1500;TSS1500	S_Shore,S_Shore	ATP13A2;ATP13A2;ATP13A2,ATP13A2;ATP13A2;ATP13A2	NM_022089;NM_001141974;NM_001141973,NM_022089;NM_001141974;NM_001141973	hyperM.iPSC
1	17254567	17254717	2	cg21534931,cg16696648	TSS1500,TSS1500	S_Shore,S_Shore	SDHB,SDHB	NM_003000,NM_003000	hyperM.iPSC
1	17319132	17319355	2	cg00569276,cg18879300	TSS1500,TSS1500	S_Shore,S_Shore	PADI2,PADI2	NM_007365,NM_007365	hypoM.iPSC
1	17348243	17348799	4	cg00924685,cg10432422,cg26516532,cg27576785	_,_	N_Shore,Island,Island,S_Shore	_,_	_,_	hyperM.iPSC
1	17402814	17403263	2	cg21010178,cg21208518	TSS1500,TSS1500	_,_	PADI1,PADI1	NM_013358,NM_013358	hyperM.iPSC
1	17411099	17411720	2	cg24724618,cg00954039	Body,Body	_,_	PADI1,PADI1	NM_013358,NM_013358	hyperM.iPSC
1	17413976	17414614	2	cg05800639,cg20321265	Body,Body	_,_	PADI1,PADI1	NM_013358,NM_013358	hyperM.iPSC
1	17446765	17448194	7	cg17589397,cg01459162,cg11534596,cg21966975,cg14664242,cg18768338,cg12858514	TSS1500,TSS1500,TSS1500,TSS200,TSS200,TSS200,5'UTR;1stExon	_,_	PADI3,PADI3,PADI3,PADI3,PADI3,PADI3,PADI3;PADI3	NM_016233,NM_016233,NM_016233,NM_016233,NM_016233,NM_016233,NM_016233;NM_016233	hyperM.iPSC
1	17505782	17507303	6	cg05124692,cg23228178,cg16091981,cg26918754,cg21295838,cg18333690	TSS1500,TSS1500,TSS200,TSS200,1stExon;5'UTR,1stExon;5'UTR	_,_	PADI4,PADI4,PADI4,PADI4,PADI4;PADI4,PADI4;PADI4	NM_012387,NM_012387,NM_012387,NM_012387,NM_012387;NM_012387,NM_012387;NM_012387	hyperM.iPSC
1	17535254	17535272	2	cg17785802,cg03547640	Body,Body	_,_	PADI4,PADI4	NM_012387,NM_012387	hyperM.iPSC
1	17570521	17571441	4	cg00298399,cg13879177,cg16017904,cg12643633	TSS1500,TSS1500,TSS1500,1stExon	_,_	PADI6,PADI6,PADI6,PADI6	NM_207421,NM_207421,NM_207421,NM_207421	hyperM.iPSC
1	17618873	17619427	4	cg07965774,cg01904812,cg09299086,cg08141956	Body;Body,Body;Body,Body;Body,Body;Body	Island,Island,Island,S_Shore	RCC2;RCC2,RCC2;RCC2,RCC2;RCC2,RCC2;RCC2	NM_018715;NM_001136204,NM_018715;NM_001136204,NM_018715;NM_001136204,NM_018715;NM_001136204	hyperM.iPSC
1	17623233	17624107	5	cg00967854,cg16171860,cg03545719,cg22785554,cg21918969	Body;Body,Body;Body,Body;Body,Body;Body,Body;Body	_,_	RCC2;RCC2,RCC2;RCC2,RCC2;RCC2,RCC2;RCC2,RCC2;RCC2	NM_018715;NM_001136204,NM_018715;NM_001136204,NM_018715;NM_001136204,NM_018715;NM_001136204,NM_018715;NM_001136204	hyperM.iPSC
1	17719295	17719402	4	cg24874425,cg10773780,cg24539455,cg04872947	_,_	_,_	_,_	_,_	hyperM.iPSC
1	17816943	17817247	3	cg15927316,cg07224918,cg07233343	Body;Body,Body;Body,Body;Body	_,_	ARHGEF10L;ARHGEF10L,ARHGEF10L;ARHGEF10L,ARHGEF10L;ARHGEF10L	NM_001011722;NM_018125,NM_001011722;NM_018125,NM_001011722;NM_018125	hyperM.iPSC
1	17932863	17933092	3	cg15131789,cg17902290,cg06956784	_,_	_,_	_,_	_,_	hyperM.iPSC
1	18024731	18025226	3	cg09821328,cg20699305,cg20796611	Body,Body,Body	N_Shore,Island,Island	ACTL8,ACTL8,ACTL8	NM_030812,NM_030812,NM_030812	hyperM.iPSC
1	18279373	18279399	2	cg21291759,cg01727764	_,_	_,_	_,_	_,_	hyperM.iPSC
1	18482322	18483109	2	cg26053526,cg13921220	Body,Body	_,_	IGSF21,IGSF21	NM_032880,NM_032880	hyperM.iPSC
1	18490217	18490378	3	cg17943995,cg09470268,cg00386725	Body,Body,Body	_,_	IGSF21,IGSF21,IGSF21	NM_032880,NM_032880,NM_032880	hyperM.iPSC
1	18564365	18564577	4	cg24810242,cg18015787,cg13426876,cg17720021	Body,Body,Body,Body	N_Shore,Island,Island,Island	IGSF21,IGSF21,IGSF21,IGSF21	NM_032880,NM_032880,NM_032880,NM_032880	hyperM.iPSC
1	18573190	18573212	2	cg23010629,cg10442251	Body,Body	N_Shelf,N_Shelf	IGSF21,IGSF21	NM_032880,NM_032880	hypoM.iPSC
1	18573478	18573486	2	cg26818821,cg01083050	Body,Body	N_Shelf,N_Shelf	IGSF21,IGSF21	NM_032880,NM_032880	hyperM.iPSC
1	18679287	18682351	9	cg11175836,cg17156862,cg05040210,cg14356550,cg24076588,cg15131316,cg03733578,cg07632391,cg21693033	TSS1500,TSS1500,1stExon,1stExon,1stExon,1stExon,1stExon,1stExon,1stExon	N_Shelf,N_Shore,N_Shore,N_Shore,N_Shore,Island,Island,Island,S_Shore	KLHDC7A,KLHDC7A,KLHDC7A,KLHDC7A,KLHDC7A,KLHDC7A,KLHDC7A,KLHDC7A,KLHDC7A	NM_152375,NM_152375,NM_152375,NM_152375,NM_152375,NM_152375,NM_152375,NM_152375,NM_152375	hyperM.iPSC
1	18831410	18831941	2	cg07398105,cg00855990	Body;Body;Body,Body;Body;Body	Island,Island	PAX7;PAX7;PAX7,PAX7;PAX7;PAX7	NM_013945;NM_002584;NM_001135254,NM_013945;NM_002584;NM_001135254	hypoM.iPSC
1	18836257	18837678	5	cg13207345,cg04126266,cg02178648,cg06220449,cg22077481	Body;Body;Body,Body;Body;Body,Body;Body;Body,Body;Body;Body,Body;Body;Body	N_Shore,N_Shore,Island,Island,S_Shore	PAX7;PAX7;PAX7,PAX7;PAX7;PAX7,PAX7;PAX7;PAX7,PAX7;PAX7;PAX7,PAX7;PAX7;PAX7	NM_013945;NM_002584;NM_001135254,NM_013945;NM_002584;NM_001135254,NM_013945;NM_002584;NM_001135254,NM_013945;NM_002584;NM_001135254,NM_013945;NM_002584;NM_001135254	hypoM.iPSC
1	18883603	18883759	2	cg12407421,cg21215218	Body;Body;Body,Body;Body;Body	_,_	PAX7;PAX7;PAX7,PAX7;PAX7;PAX7	NM_013945;NM_002584;NM_001135254,NM_013945;NM_002584;NM_001135254	hyperM.iPSC
1	18921490	18921517	2	cg09791440,cg17468663	Body;Body;Body,Body;Body;Body	_,_	PAX7;PAX7;PAX7,PAX7;PAX7;PAX7	NM_013945;NM_002584;NM_001135254,NM_013945;NM_002584;NM_001135254	hyperM.iPSC
1	18924322	18924791	3	cg00247426,cg07706053,cg01965874	Body;Body;Body,Body;Body;Body,Body;Body;Body	_,_	PAX7;PAX7;PAX7,PAX7;PAX7;PAX7,PAX7;PAX7;PAX7	NM_013945;NM_002584;NM_001135254,NM_013945;NM_002584;NM_001135254,NM_013945;NM_002584;NM_001135254	hyperM.iPSC
1	18983321	18983676	2	cg13786083,cg14856563	_,_	Island,S_Shore	_,_	_,_	hyperM.iPSC
1	19019496	19019808	3	cg15553946,cg00560632,cg23243030	_,_	_,_	_,_	_,_	hyperM.iPSC
1	19039100	19039179	2	cg00925953,cg26528477	Body,Body	_,_	TAS1R2,TAS1R2	NM_152232,NM_152232	hyperM.iPSC
1	19053627	19053977	3	cg11806635,cg16986315,cg00375983	Body,Body,Body	Island,Island,Island	TAS1R2,TAS1R2,TAS1R2	NM_152232,NM_152232,NM_152232	hyperM.iPSC
1	19059392	19059997	2	cg21731286,cg02058944	TSS1500,TSS1500	_,_	TAS1R2,TAS1R2	NM_152232,NM_152232	hyperM.iPSC
1	19074447	19074617	2	cg11844800,cg03754153	Body;Body;Body,Body;Body;Body	N_Shelf,N_Shore	ALDH4A1;ALDH4A1;ALDH4A1,ALDH4A1;ALDH4A1;ALDH4A1	NM_170726;NM_001161504;NM_003748,NM_170726;NM_001161504;NM_003748	hyperM.iPSC
1	19076484	19076820	3	cg13489553,cg10108612,cg17886330	Body;Body;Body,Body;Body;Body,Body;Body;Body	Island,Island,Island	ALDH4A1;ALDH4A1;ALDH4A1,ALDH4A1;ALDH4A1;ALDH4A1,ALDH4A1;ALDH4A1;ALDH4A1	NM_170726;NM_001161504;NM_003748,NM_170726;NM_001161504;NM_003748,NM_170726;NM_001161504;NM_003748	hyperM.iPSC
1	19126618	19127318	2	cg04276058,cg10231067	Body,Body	_,_	IFFO2,IFFO2	NM_001136265,NM_001136265	hyperM.iPSC
1	19265660	19266457	2	ch.1.653511R,cg14181528	_,_	_,_	_,_	_,_	hyperM.iPSC
1	19559844	19560643	3	cg12763668,cg24593138,cg07905985	Body,Body,Body	_,_	CAPZB,CAPZB,CAPZB	NM_004930,NM_004930,NM_004930	hyperM.iPSC
1	19628937	19629426	2	cg06788764,cg24671886	Body,Body	_,_	CAPZB,CAPZB	NM_004930,NM_004930	hyperM.iPSC
1	19637273	19637408	2	cg11962640,cg23111655	Body,Body	_,_	CAPZB,CAPZB	NM_004930,NM_004930	hyperM.iPSC
1	19795454	19795695	2	cg20248822,cg04925599	TSS1500,TSS1500	N_Shore,N_Shore	C1orf151,C1orf151	NM_001032363,NM_001032363	hyperM.iPSC
1	19856062	19856603	2	cg13550729,cg26671966	Body;Body,3'UTR;3'UTR	_,_	NBL1;NBL1,NBL1;NBL1	NM_005380;NM_182744,NM_182744;NM_005380	hyperM.iPSC
1	19864611	19865572	4	cg10741760,cg18023598,cg00365524,cg06033660	5'UTR;1stExon,1stExon,1stExon,Body	Island,Island,Island,S_Shore	HTR6;HTR6,HTR6,HTR6,HTR6	NM_000871;NM_000871,NM_000871,NM_000871,NM_000871	hyperM.iPSC
1	19878302	19878409	2	cg25276126,cg19628225	Body,Body	Island,Island	HTR6,HTR6	NM_000871,NM_000871	hyperM.iPSC
1	19998433	19999366	2	cg09138671,cg26886978	5'UTR,TSS1500	N_Shore,Island	TMCO4,TMCO4	NM_181719,NM_181719	hyperM.iPSC
1	20013415	20015293	4	cg25096740,cg23214395,cg17135423,cg15505276	3'UTR;1stExon,TSS200,TSS1500,TSS1500	_,_	RNF186;RNF186,RNF186,RNF186,RNF186	NM_019062;NM_019062,NM_019062,NM_019062,NM_019062	hyperM.iPSC
1	20077622	20077646	2	cg12394941,cg15602420	_,_	N_Shelf,N_Shelf	_,_	_,_	hyperM.iPSC
1	20082435	20082856	2	cg03134147,cg10016004	Body,Body	S_Shore,S_Shore	OTUD3,OTUD3	NM_015207,NM_015207	hyperM.iPSC
1	20122773	20123867	4	cg01441698,cg24613957,cg10812684,cg24742092	TSS200,TSS1500,TSS1500,TSS1500	_,_	PLA2G2E,PLA2G2E,PLA2G2E,PLA2G2E	NM_014589,NM_014589,NM_014589,NM_014589	hyperM.iPSC
1	20177549	20180050	6	cg10993488,cg02860199,cg08235413,cg22220722,cg11037787,cg25755892	Body;Body;Body;Body,5'UTR;5'UTR;5'UTR;5'UTR,5'UTR;5'UTR;5'UTR;5'UTR,5'UTR;5'UTR;TSS1500;5'UTR,TSS1500;TSS200;TSS200;TSS200,TSS1500;TSS1500;TSS1500;TSS1500	_,_	PLA2G2A;PLA2G2A;PLA2G2A;PLA2G2A,PLA2G2A;PLA2G2A;PLA2G2A;PLA2G2A,PLA2G2A;PLA2G2A;PLA2G2A;PLA2G2A,PLA2G2A;PLA2G2A;PLA2G2A;PLA2G2A,PLA2G2A;PLA2G2A;PLA2G2A;PLA2G2A,PLA2G2A;PLA2G2A;PLA2G2A;PLA2G2A	NM_001161728;NM_000300;NM_001161729;NM_001161727,NM_000300;NM_001161729;NM_001161727;NM_001161728,NM_000300;NM_001161729;NM_001161727;NM_001161728,NM_000300;NM_001161727;NM_001161729;NM_001161728,NM_001161729;NM_001161727;NM_001161728;NM_000300,NM_001161728;NM_000300;NM_001161729;NM_001161727	hyperM.iPSC
1	20269277	20269337	2	cg06222062,cg25974901	TSS200,1stExon;5'UTR	_,_	PLA2G5,PLA2G5;PLA2G5	NM_000929,NM_000929;NM_000929	hyperM.iPSC
1	20318249	20319244	2	cg14321743,cg07142319	Body,TSS1500	_,_	PLA2G2D,PLA2G2D	NM_012400,NM_012400	hyperM.iPSC
1	20337805	20338081	3	cg16087263,cg09851650,cg21546132	TSS1500,TSS1500,TSS1500	_,_	PLA2G2F,PLA2G2F,PLA2G2F	NM_022819,NM_022819,NM_022819	hyperM.iPSC
1	20374145	20374821	3	cg04605617,cg08042135,cg01063509	1stExon,TSS200,TSS1500	_,_	PLA2G2C,PLA2G2C,PLA2G2C	NM_001105572,NM_001105572,NM_001105572	hyperM.iPSC
1	20384369	20384730	2	cg06090867,cg08130175	TSS1500,TSS1500	N_Shore,N_Shore	UBXN10,UBXN10	NM_152376,NM_152376	hyperM.iPSC
1	20442043	20442302	2	cg22333412,cg15123187	_,_	Island,Island	_,_	_,_	hyperM.iPSC
1	20489027	20490043	4	cg16965374,cg13463492,cg00433406,cg04637372	TSS1500,TSS1500,TSS1500,5'UTR;1stExon	_,_	VWA5B1,VWA5B1,VWA5B1,VWA5B1;VWA5B1	NM_001039500,NM_001039500,NM_001039500,NM_001039500;NM_001039500	hyperM.iPSC
1	20521695	20522546	2	cg25104613,cg24713770	Body,Body	_,_	VWA5B1,VWA5B1	NM_001039500,NM_001039500	hyperM.iPSC
1	20564541	20565601	3	cg02873528,cg04722511,cg26831566	_,_	N_Shore,N_Shore,Island	_,_	_,_	hyperM.iPSC
1	20569915	20570610	2	cg26315261,cg12624197	_,_	S_Shelf,_	_,_	_,_	hyperM.iPSC
1	20598585	20599261	2	cg08722591,cg04415114	_,_	_,_	_,_	_,_	hyperM.iPSC
1	20605067	20605141	2	cg05773309,cg26309074	_,_	_,_	_,_	_,_	hyperM.iPSC
1	20628121	20628631	2	cg10586107,cg20270882	_,_	_,_	_,_	_,_	hyperM.iPSC
1	20786615	20786909	2	cg24502330,cg03693486	TSS1500,TSS1500	_,_	CDA,CDA	NM_001785,NM_001785	hyperM.iPSC
1	20861177	20861350	3	cg08911391,cg24876897,cg12743621	TSS1500,TSS1500,TSS1500	S_Shore,S_Shore,S_Shore	DDOST,DDOST,DDOST	NM_005216,NM_005216,NM_005216	hyperM.iPSC
1	21459418	21459761	3	cg16385763,cg13562122,cg02994246	Body;Body;Body;Body,Body;Body;Body;Body,Body;Body;Body;Body	_,_	ECE1;ECE1;ECE1;ECE1,ECE1;ECE1;ECE1;ECE1,ECE1;ECE1;ECE1;ECE1	NM_001113347;NM_001397;NM_001113349;NM_001113348,NM_001113347;NM_001397;NM_001113349;NM_001113348,NM_001113347;NM_001397;NM_001113349;NM_001113348	hyperM.iPSC
1	21479028	21479204	2	cg01780990,cg21005416	TSS1500;Body;Body;Body,TSS1500;Body;Body;Body	_,_	ECE1;ECE1;ECE1;ECE1,ECE1;ECE1;ECE1;ECE1	NM_001113347;NM_001397;NM_001113349;NM_001113348,NM_001113347;NM_001397;NM_001113349;NM_001113348	hyperM.iPSC
1	21737375	21737483	2	cg22719004,cg14781605	5'UTR,5'UTR	_,_	ALPL,ALPL	NM_000478,NM_000478	hyperM.iPSC
1	21773574	21773847	3	cg24722348,cg07142010,cg16270485	Body;Body,Body;Body,Body;Body	_,_	ALPL;ALPL,ALPL;ALPL,ALPL;ALPL	NM_001127501;NM_000478,NM_001127501;NM_000478,NM_001127501;NM_000478	hyperM.iPSC
1	21786045	21786144	2	cg10112270,cg08922729	_,_	_,_	_,_	_,_	hyperM.iPSC
1	21802500	21802923	4	cg19776877,cg14529891,cg17420132,cg19502417	Body;Body;Body,Body;Body;Body,Body;Body;Body,Body;Body;Body	N_Shore,Island,Island,Island	RAP1GAP;RAP1GAP;RAP1GAP,RAP1GAP;RAP1GAP;RAP1GAP,RAP1GAP;RAP1GAP;RAP1GAP,RAP1GAP;RAP1GAP;RAP1GAP	NM_001145658;NM_001145657;NM_002885,NM_001145658;NM_001145657;NM_002885,NM_001145658;NM_001145657;NM_002885,NM_001145658;NM_001145657;NM_002885	hyperM.iPSC
1	21838897	21839087	3	cg07499899,cg03727673,cg06993467	Body;5'UTR;5'UTR,Body;5'UTR;5'UTR,Body;5'UTR;5'UTR	_,_	RAP1GAP;RAP1GAP;RAP1GAP,RAP1GAP;RAP1GAP;RAP1GAP,RAP1GAP;RAP1GAP;RAP1GAP	NM_001145658;NM_002885;NM_001145657,NM_001145658;NM_002885;NM_001145657,NM_001145658;NM_002885;NM_001145657	hyperM.iPSC
1	21858688	21858873	2	cg20487231,cg05120085	5'UTR;5'UTR,5'UTR;5'UTR	Island,S_Shore	RAP1GAP;RAP1GAP,RAP1GAP;RAP1GAP	NM_002885;NM_001145657,NM_002885;NM_001145657	hyperM.iPSC
1	21865988	21866142	2	cg12093060,cg02760280	5'UTR;5'UTR,5'UTR;5'UTR	N_Shore,N_Shore	RAP1GAP;RAP1GAP,RAP1GAP;RAP1GAP	NM_002885;NM_001145657,NM_002885;NM_001145657	hyperM.iPSC
1	22009893	22010579	3	cg01058602,cg15987572,cg00574196	TSS1500,TSS1500,TSS1500	N_Shelf,N_Shelf,N_Shelf	LDLRAD2,LDLRAD2,LDLRAD2	NM_001013693,NM_001013693,NM_001013693	hyperM.iPSC
1	22013977	22013987	2	cg17065852,cg22025064	Body,Body	Island,Island	LDLRAD2,LDLRAD2	NM_001013693,NM_001013693	hyperM.iPSC
1	22021513	22022483	2	cg00309945,cg12939901	3'UTR;3'UTR,3'UTR;Body	N_Shore,Island	LDLRAD2;HSPG2,LDLRAD2;HSPG2	NM_001013693;NM_005529,NM_001013693;NM_005529	hyperM.iPSC
1	22079549	22079794	2	cg10820203,cg13940218	Body,Body	_,N_Shelf	HSPG2,HSPG2	NM_005529,NM_005529	hyperM.iPSC
1	22100740	22101169	2	cg00359395,cg24332002	Body,Body	_,_	HSPG2,HSPG2	NM_005529,NM_005529	hyperM.iPSC
1	22223843	22224135	6	cg17240885,cg03114585,cg01720742,cg21789280,cg01573472,cg21388327	TSS1500;TSS1500,TSS1500;TSS1500,TSS1500;TSS1500,TSS1500;TSS1500,TSS1500;TSS200,TSS1500;TSS200	N_Shore,N_Shore,N_Shore,N_Shore,N_Shore,N_Shore	HSPC157;HSPC157,HSPC157;HSPC157,HSPC157;HSPC157,HSPC157;HSPC157,HSPC157;HSPC157,HSPC157;HSPC157	NR_023918;NR_023919,NR_023918;NR_023919,NR_023918;NR_023919,NR_023918;NR_023919,NR_023919;NR_023918,NR_023919;NR_023918	hyperM.iPSC
1	22541226	22541245	2	cg13827179,cg06794253	_,_	Island,Island	_,_	_,_	hyperM.iPSC
1	22550323	22550500	2	cg00456299,cg09180171	_,_	_,_	_,_	_,_	hypoM.iPSC
1	22744174	22744299	2	cg15061159,cg20459138	_,_	_,_	_,_	_,_	hyperM.iPSC
1	22775124	22775993	2	cg01628425,cg12596914	Body;Body,Body;Body	N_Shore,Island	EPHA8;EPHA8,EPHA8;EPHA8	NM_001006943;NM_020526,NM_001006943;NM_020526	hyperM.iPSC
1	22788213	22788240	2	cg23660155,cg08655148	Body;Body,Body;Body	_,_	EPHA8;EPHA8,EPHA8;EPHA8	NM_001006943;NM_020526,NM_001006943;NM_020526	hyperM.iPSC
1	22790792	22792756	5	cg01486686,cg06824294,cg15597364,cg05266226,cg05269784	Body,Body,Body,Body,Body	N_Shore,N_Shore,Island,Island,Island	EPHA8,EPHA8,EPHA8,EPHA8,EPHA8	NM_020526,NM_020526,NM_020526,NM_020526,NM_020526	hyperM.iPSC
1	22798034	22798076	2	cg09940915,cg22493620	Body,Body	N_Shore,N_Shore	EPHA8,EPHA8	NM_020526,NM_020526	hyperM.iPSC
1	22800115	22800512	3	cg20991983,cg22039566,cg11225745	Body,Body,Body	Island,S_Shore,S_Shore	EPHA8,EPHA8,EPHA8	NM_020526,NM_020526,NM_020526	hyperM.iPSC
1	22834619	22835573	4	cg13168221,cg08710757,cg07109332,cg10916651	TSS1500,TSS1500,TSS1500,TSS200	_,_	C1QA,C1QA,C1QA,C1QA	NM_015991,NM_015991,NM_015991,NM_015991	hyperM.iPSC
1	22841927	22842926	4	cg11393848,cg12775742,cg17104151,cg00136477	TSS1500;TSS1500,TSS200;TSS200,1stExon;5'UTR;5'UTR;1stExon,5'UTR;5'UTR	_,N_Shelf,N_Shelf,N_Shelf	C1QC;C1QC,C1QC;C1QC,C1QC;C1QC;C1QC;C1QC,C1QC;C1QC	NM_001114101;NM_172369,NM_172369;NM_001114101,NM_001114101;NM_172369;NM_001114101;NM_172369,NM_172369;NM_001114101	hyperM.iPSC
1	22844988	22845343	2	cg04522691,cg01773518	Body;Body,Body;Body	N_Shore,N_Shore	C1QC;C1QC,C1QC;C1QC	NM_001114101;NM_172369,NM_001114101;NM_172369	hyperM.iPSC
1	22846736	22846767	2	cg25600750,cg04161137	Body;Body,Body;Body	Island,Island	C1QC;C1QC,C1QC;C1QC	NM_001114101;NM_172369,NM_001114101;NM_172369	hyperM.iPSC
1	22851143	22852326	7	cg07012832,cg01728495,cg10088685,cg14041976,cg00215182,cg24931346,cg10103528	TSS1500,TSS1500,TSS1500,TSS1500,TSS200,TSS200,5'UTR;1stExon	_,_	C1QB,C1QB,C1QB,C1QB,C1QB,C1QB,C1QB;C1QB	NM_000491,NM_000491,NM_000491,NM_000491,NM_000491,NM_000491,NM_000491;NM_000491	hyperM.iPSC
1	22876077	22876997	3	cg09062638,cg02623028,cg05157541	_,_	Island,Island,S_Shore	_,_	_,_	hyperM.iPSC
1	23152118	23153064	6	cg17873612,cg11070863,cg00172812,cg01647314,cg17974166,cg24444923	_,_	N_Shore,Island,Island,Island,Island,Island	_,_	_,_	hyperM.iPSC
1	23368114	23369235	3	cg04553810,cg26530485,cg01435109	TSS200;TSS200,TSS1500;TSS1500,TSS1500;TSS1500	_,_	LUZP1;LUZP1,LUZP1;LUZP1,LUZP1;LUZP1	NM_033631;NM_001142546,NM_033631;NM_001142546,NM_033631;NM_001142546	hyperM.iPSC
1	23393894	23395223	5	cg11953164,cg20678835,cg08872493,cg04974804,cg20887241	TSS200,TSS200,TSS200,TSS1500,TSS1500	_,_	HTR1D,HTR1D,HTR1D,HTR1D,HTR1D	NM_000864,NM_000864,NM_000864,NM_000864,NM_000864	hyperM.iPSC
1	23541278	23541379	2	cg00907427,cg08718097	5'UTR;5'UTR;5'UTR;5'UTR,5'UTR;5'UTR;5'UTR;5'UTR	N_Shore,N_Shore	HNRNPR;HNRNPR;HNRNPR;HNRNPR,HNRNPR;HNRNPR;HNRNPR;HNRNPR	NM_005826;NM_001102397;NM_001102399;NM_001102398,NM_005826;NM_001102397;NM_001102399;NM_001102398	hyperM.iPSC
1	23568608	23569000	5	cg20959676,cg05139070,cg24038158,cg16727538,cg15598244	Body;5'UTR;1stExon;1stExon;TSS1500,3'UTR;Body;5'UTR;1stExon;1stExon;TSS1500,3'UTR;Body;5'UTR;1stExon;1stExon;TSS1500,3'UTR;Body;5'UTR;1stExon;1stExon;TSS1500,3'UTR;Body;TSS200;1stExon	Island,S_Shore,S_Shore,S_Shore,S_Shore	C1orf213;ZNF436;C1orf213;ZNF436;ZNF436,C1orf213;C1orf213;ZNF436;C1orf213;ZNF436;ZNF436,C1orf213;C1orf213;ZNF436;C1orf213;ZNF436;ZNF436,C1orf213;C1orf213;ZNF436;C1orf213;ZNF436;ZNF436,C1orf213;C1orf213;ZNF436;C1orf213	NM_001008896;NM_001077195;NM_138479;NM_001077195;NM_030634,NM_138479;NM_001008896;NM_001077195;NM_138479;NM_001077195;NM_030634,NM_138479;NM_001008896;NM_001077195;NM_138479;NM_001077195;NM_030634,NM_138479;NM_001008896;NM_001077195;NM_138479;NM_001077195;NM_030634,NM_138479;NM_001008896;NM_001077195;NM_138479	hyperM.iPSC
1	23569845	23570093	3	cg16240683,cg16696234,cg22502492	3'UTR;Body;1stExon;TSS1500,3'UTR;Body;1stExon;TSS1500,3'UTR;Body;1stExon;TSS1500	S_Shore,S_Shore,S_Shore	C1orf213;C1orf213;C1orf213;ZNF436,C1orf213;C1orf213;C1orf213;ZNF436,C1orf213;C1orf213;C1orf213;ZNF436	NM_138479;NM_001008896;NM_138479;NM_001077195,NM_138479;NM_001008896;NM_138479;NM_001077195,NM_138479;NM_001008896;NM_138479;NM_001077195	hypoM.iPSC
1	23636037	23636369	3	cg02351745,cg01095837,cg21105827	Body;Body,Body;Body,Body;Body	Island,Island,Island	ASAP3;ASAP3,ASAP3;ASAP3,ASAP3;ASAP3	NM_017707;NM_001143778,NM_017707;NM_001143778,NM_017707;NM_001143778	hypoM.iPSC
1	23727434	23727736	3	cg11526198,cg00231049,cg05590755	Body,Body,Body	N_Shelf,N_Shore,N_Shore	E2F2,E2F2,E2F2	NM_004091,NM_004091,NM_004091	hyperM.iPSC
1	23752258	23753068	2	cg11580897,cg15102567	_,_	N_Shore,N_Shore	_,_	_,_	hyperM.iPSC
1	23890530	23890674	3	cg24406162,cg11252261,cg04608326	TSS1500,TSS1500,TSS1500	N_Shore,N_Shore,N_Shore	RPL11,RPL11,RPL11	NM_000975,NM_000975,NM_000975	hyperM.iPSC
1	23943840	23944144	2	cg12717729,cg08279092	Body,Body	S_Shore,S_Shore	TCEB3,TCEB3	NM_003198,NM_003198	hyperM.iPSC
1	23989902	23990051	2	cg23617676,cg16902244	TSS1500,TSS200	N_Shore,N_Shore	LYPLA2,LYPLA2	NM_007260,NM_007260	hyperM.iPSC
1	24067618	24068174	5	cg10051214,cg15692032,cg24792360,cg21528040,cg22614927	TSS200,TSS1500,TSS1500,TSS1500,TSS1500	S_Shore,S_Shore,S_Shore,S_Shore,S_Shore	FUCA1,FUCA1,FUCA1,FUCA1,FUCA1	NM_000147,NM_000147,NM_000147,NM_000147,NM_000147	hyperM.iPSC
1	24101426	24103940	7	cg20297631,cg19276111,cg26404511,cg03611151,cg07967717,cg23287243,cg00660272	5'UTR,5'UTR,5'UTR,5'UTR,5'UTR,5'UTR,5'UTR	N_Shore,Island,S_Shore,S_Shore,S_Shore,S_Shore,S_Shore	CNR2,CNR2,CNR2,CNR2,CNR2,CNR2,CNR2	NM_001841,NM_001841,NM_001841,NM_001841,NM_001841,NM_001841,NM_001841	hyperM.iPSC
1	24112407	24112656	4	cg16679650,cg03750587,cg16410115,cg26151675	TSS200,TSS200,TSS200,TSS1500	_,_	CNR2,CNR2,CNR2,CNR2	NM_001841,NM_001841,NM_001841,NM_001841	hyperM.iPSC
1	24311194	24311662	4	cg14564939,cg06548416,cg20254361,cg01350686	1stExon;5'UTR,TSS200,TSS200,TSS1500	_,_	MYOM3;MYOM3,MYOM3,MYOM3,MYOM3	NM_152372;NM_152372,NM_152372,NM_152372,NM_152372	hyperM.iPSC
1	24342151	24342792	4	cg09152089,cg21293216,cg25946374,cg02072322	1stExon,TSS200,TSS200,TSS1500	_,_	IL22RA1,IL22RA1,IL22RA1,IL22RA1	NM_021258,NM_021258,NM_021258,NM_021258	hyperM.iPSC
1	24350425	24350497	2	cg10842008,cg08878372	_,_	_,_	_,_	_,_	hypoM.iPSC
1	24386069	24387144	3	cg08700651,cg07509155,cg24435747	Body;Body;Body,TSS1500;TSS1500;TSS1500,TSS1500;TSS1500;TSS1500	N_Shore,Island,S_Shore	IL28RA;IL28RA;IL28RA,IL28RA;IL28RA;IL28RA,IL28RA;IL28RA;IL28RA	NM_170743;NM_173064;NM_173065,NM_173065;NM_173064;NM_170743,NM_173065;NM_173064;NM_170743	hypoM.iPSC
1	24401058	24401420	2	cg17172066,cg15571353	Body,Body	_,_	LOC284632,LOC284632	NR_027087,NR_027087	hyperM.iPSC
1	24518609	24518792	4	cg23820945,cg14167629,cg16155382,cg01119512	1stExon;5'UTR,1stExon,Body,Body	N_Shelf,N_Shelf,N_Shelf,N_Shore	GRHL3;GRHL3,GRHL3,GRHL3,GRHL3	NM_198173;NM_198173,NM_198173,NM_198173,NM_198173	hypoM.iPSC
1	24615616	24616079	2	cg18323236,cg15697160	5'UTR,5'UTR	Island,S_Shore	NIPAL3,NIPAL3	NM_020448,NM_020448	hyperM.iPSC
1	24734191	24734405	3	cg20146241,cg18128887,cg01519464	Body,Body,3'UTR	N_Shore,Island,Island	RCAN3,RCAN3,RCAN3	NM_013441,NM_013441,NM_013441	hypoM.iPSC
1	24943847	24943942	3	cg10522447,cg26838747,cg15451272	TSS1500,TSS1500,TSS1500	N_Shore,N_Shore,Island	CLIC4,CLIC4,CLIC4	NM_013943,NM_013943,NM_013943	hyperM.iPSC
1	25113452	25113525	3	cg13566436,cg20674490,cg05162523	Body;Body,Body;Body,Body;Body	_,_	RUNX3;RUNX3,RUNX3;RUNX3,RUNX3;RUNX3	NM_001031680;NM_004350,NM_001031680;NM_004350,NM_001031680;NM_004350	hyperM.iPSC
1	25119441	25119509	2	cg15498134,cg08544331	Body;Body,Body;Body	_,_	RUNX3;RUNX3,RUNX3;RUNX3	NM_001031680;NM_004350,NM_001031680;NM_004350	hyperM.iPSC
1	25126675	25126736	3	cg05656688,cg03769939,cg11336061	Body;Body,Body;Body,Body;Body	N_Shore,N_Shore,N_Shore	RUNX3;RUNX3,RUNX3;RUNX3,RUNX3;RUNX3	NM_001031680;NM_004350,NM_001031680;NM_004350,NM_001031680;NM_004350	hypoM.iPSC
1	25130092	25131693	22	cg07996594,cg04221877,cg15014975,cg24019564,cg10993442,cg24842859,cg20695936,cg13106389,cg18087266,cg25882256,cg04250451,cg10013501,cg25470148,cg24463471,cg21406271,cg26256263,cg13305657,cg24006721,cg00929376,cg04907595,cg03171924,cg26864395	TSS1500;Body,TSS1500;Body,TSS1500;Body,TSS1500;Body,TSS1500;Body,TSS1500;Body,TSS1500;Body,TSS1500;Body,TSS1500;Body,TSS1500;Body,TSS1500;Body,TSS1500;Body,TSS1500;Body,TSS1500;Body,TSS1500;Body,TSS1500;Body,TSS1500;Body,TSS1500;Body,TSS1500;Body,TSS1500;Body,Body,Body	Island,Island,Island,Island,Island,Island,Island,Island,Island,Island,Island,Island,Island,Island,Island,Island,Island,Island,Island,Island,Island,S_Shore	RUNX3;RUNX3,RUNX3;RUNX3,RUNX3;RUNX3,RUNX3;RUNX3,RUNX3;RUNX3,RUNX3;RUNX3,RUNX3;RUNX3,RUNX3;RUNX3,RUNX3;RUNX3,RUNX3;RUNX3,RUNX3;RUNX3,RUNX3;RUNX3,RUNX3;RUNX3,RUNX3;RUNX3,RUNX3;RUNX3,RUNX3;RUNX3,RUNX3;RUNX3,RUNX3;RUNX3,RUNX3;RUNX3,RUNX3;RUNX3,RUNX3,RUNX3	NM_004350;NM_001031680,NM_004350;NM_001031680,NM_004350;NM_001031680,NM_004350;NM_001031680,NM_004350;NM_001031680,NM_004350;NM_001031680,NM_004350;NM_001031680,NM_004350;NM_001031680,NM_004350;NM_001031680,NM_004350;NM_001031680,NM_004350;NM_001031680,NM_004350;NM_001031680,NM_004350;NM_001031680,NM_004350;NM_001031680,NM_004350;NM_001031680,NM_004350;NM_001031680,NM_004350;NM_001031680,NM_00435…	hypoM.iPSC
1	25163534	25164578	3	cg14182690,cg04554131,cg14425908	Body,TSS200,TSS1500	_,_	RUNX3,RUNX3,RUNX3	NM_001031680,NM_001031680,NM_001031680	hyperM.iPSC
1	25221593	25222268	2	cg06527318,cg27537125	_,_	_,_	_,_	_,_	hyperM.iPSC
1	25298510	25299014	2	cg24955895,cg24488469	_,_	_,_	_,_	_,_	hyperM.iPSC
1	25741556	25741655	2	cg06395634,cg11214576	TSS1500,TSS1500	N_Shore,N_Shore	LDLRAP1,LDLRAP1	NM_015627,NM_015627	hyperM.iPSC
1	25817389	25817629	2	cg16585234,cg09027133	1stExon,Body	S_Shore,S_Shore	MAN1C1,MAN1C1	NM_020379,NM_020379	hypoM.iPSC
1	25970578	25970801	2	cg05193538,cg04980428	Body,Body	Island,S_Shore	MAN1C1,MAN1C1	NM_020379,NM_020379	hyperM.iPSC
1	26017915	26018592	4	cg21139639,cg14149304,cg08304059,cg13876650	TSS1500;TSS1500;TSS1500,TSS1500;TSS1500;TSS1500,TSS1500;TSS1500;TSS1500,TSS1500;TSS1500;TSS1500;TSS1500	N_Shore,N_Shore,N_Shore,N_Shore	FAM54B;FAM54B;FAM54B,FAM54B;FAM54B;FAM54B,FAM54B;FAM54B;FAM54B,FAM54B;FAM54B;FAM54B;FAM54B	NM_001099625;NM_001099627;NM_019557,NM_001099625;NM_001099627;NM_019557,NM_001099625;NM_001099627;NM_019557,NM_001099625;NM_001099627;NM_019557;NM_001099626	hyperM.iPSC
1	26070947	26071308	2	cg23799313,cg12805491	TSS1500,TSS1500	N_Shelf,N_Shelf	PAQR7,PAQR7	NM_178422,NM_178422	hyperM.iPSC
1	26103493	26103669	2	cg21216015,cg03718183	Body;Body;Body;Body,Body;Body;Body;Body	N_Shore,N_Shore	STMN1;STMN1;STMN1;STMN1,STMN1;STMN1;STMN1;STMN1	NM_203401;NM_203399;NM_005563;NM_001145454,NM_203401;NM_203399;NM_005563;NM_001145454	hyperM.iPSC
1	26197708	26197936	2	cg20383084,cg06521299	TSS1500,TSS1500	S_Shore,S_Shore	PAFAH2,PAFAH2	NM_000437,NM_000437	hyperM.iPSC
1	26219399	26221071	5	cg18212039,cg21950720,cg13783323,cg07821739,cg13555278	TSS1500,TSS1500,TSS1500,TSS1500,1stExon;5'UTR	_,_	EXTL1,EXTL1,EXTL1,EXTL1,EXTL1;EXTL1	NM_004455,NM_004455,NM_004455,NM_004455,NM_004455;NM_004455	hyperM.iPSC
1	26245719	26245994	3	cg10501085,cg18303360,cg03987192	TSS1500;TSS1500,TSS1500;TSS1500,TSS1500;TSS1500	Island,Island,S_Shore	SLC30A2;SLC30A2,SLC30A2;SLC30A2,SLC30A2;SLC30A2	NM_001004434;NM_032513,NM_001004434;NM_032513,NM_001004434;NM_032513	hyperM.iPSC
1	26266596	26267022	6	cg04489573,cg16051685,cg02839330,cg24685778,cg01973987,cg13998293	1stExon;5'UTR,1stExon;5'UTR,TSS200,TSS200,TSS200,TSS1500	_,_	TRIM63;TRIM63,TRIM63;TRIM63,TRIM63,TRIM63,TRIM63,TRIM63	NM_032588;NM_032588,NM_032588;NM_032588,NM_032588,NM_032588,NM_032588,NM_032588	hyperM.iPSC
1	26367258	26368461	4	cg20152413,cg15651345,cg03722802,cg08729059	_,TSS1500,TSS1500,TSS1500	N_Shore,N_Shore,N_Shore,N_Shore	_,ZNF593,ZNF593,ZNF593	_,NM_015871,NM_015871,NM_015871	hyperM.iPSC
1	26376363	26376578	8	cg19740054,cg17330765,cg00300879,cg09890400,cg10096100,cg26412358,cg23602478,cg00147160	TSS1500;TSS1500,TSS1500;TSS1500,TSS200;TSS200,TSS200;TSS200,TSS200;TSS200,TSS200;TSS200,TSS200;TSS200,Body;5'UTR;1stExon	_,_	CNKSR1;CNKSR1,CNKSR1;CNKSR1,CNKSR1;CNKSR1,CNKSR1;CNKSR1,CNKSR1;CNKSR1,CNKSR1;CNKSR1,CNKSR1;CNKSR1,CNKSR1;CNKSR1;CNKSR1	NM_006314;NR_023345,NM_006314;NR_023345,NR_023345;NM_006314,NR_023345;NM_006314,NR_023345;NM_006314,NR_023345;NM_006314,NR_023345;NM_006314,NR_023345;NM_006314;NM_006314	hypoM.iPSC
1	26389074	26390173	5	cg20330922,cg10121294,cg04573872,cg01768342,cg02171825	TSS1500,TSS1500,TSS1500,TSS200,Body	_,_	CATSPER4,CATSPER4,CATSPER4,CATSPER4,CATSPER4	NM_198137,NM_198137,NM_198137,NM_198137,NM_198137	hyperM.iPSC
1	26419646	26419821	2	cg21300267,cg20616108	_,_	_,_	_,_	_,_	hyperM.iPSC
1	26477728	26478697	3	cg12445424,cg01294686,cg14788334	3'UTR;TSS1500,TSS200,TSS200	N_Shore,N_Shore,N_Shore	CCDC21;SH3BGRL3,SH3BGRL3,SH3BGRL3	NM_022778;NM_031286,NM_031286,NM_031286	hyperM.iPSC
1	26481369	26481735	2	cg21412456,cg24453349	3'UTR;3'UTR;3'UTR,Body;Body;Body	S_Shore,S_Shelf	UBXN11;UBXN11;UBXN11,UBXN11;UBXN11;UBXN11	NM_001077262;NM_183008;NM_145345,NM_001077262;NM_145345;NM_183008	hypoM.iPSC
1	26483898	26484040	2	cg00768487,cg24348240	Body;Body;Body,Body;Body;Body	_,_	UBXN11;UBXN11;UBXN11,UBXN11;UBXN11;UBXN11	NM_001077262;NM_145345;NM_183008,NM_001077262;NM_145345;NM_183008	hyperM.iPSC
1	26506121	26506219	2	cg03724759,cg00852783	5'UTR;TSS1500;TSS1500,5'UTR;TSS1500;TSS1500	S_Shore,S_Shore	UBXN11;UBXN11;UBXN11,UBXN11;UBXN11;UBXN11	NM_145345;NM_183008;NM_001077262,NM_145345;NM_183008;NM_001077262	hyperM.iPSC
1	26542961	26543290	2	cg10813720,cg24004139	1stExon;5'UTR,TSS1500	N_Shelf,N_Shore	AIM1L;AIM1L,AIM1L	NM_001039775;NM_001039775,NM_001039775	hyperM.iPSC
1	26608461	26608471	2	cg09799571,cg06368558	TSS1500,TSS1500	N_Shore,N_Shore	LIN28,LIN28	NM_024674,NM_024674	hyperM.iPSC
1	26609834	26609849	2	cg14011486,cg18634211	TSS200,TSS200	Island,Island	LIN28,LIN28	NM_024674,NM_024674	hyperM.iPSC
1	26729871	26730361	2	cg13092108,cg24585377	Body,Body	S_Shore,S_Shore	RPS6KA1,RPS6KA1	NM_002953,NM_002953	hypoM.iPSC
1	26985806	26986340	6	cg24313303,cg13391849,cg15110463,cg21863499,cg07782886,cg01791104	TSS1500,TSS1500,TSS1500,TSS1500,TSS1500,TSS1500	N_Shore,N_Shore,N_Shore,N_Shore,N_Shore,N_Shore	PIGV,PIGV,PIGV,PIGV,PIGV,PIGV	NM_017837,NM_017837,NM_017837,NM_017837,NM_017837,NM_017837	hyperM.iPSC
1	26988151	26988214	2	cg18289893,cg03129904	5'UTR,5'UTR	S_Shore,S_Shore	PIGV,PIGV	NM_017837,NM_017837	hyperM.iPSC
1	27024653	27025281	2	cg08535184,cg04427651	TSS1500,TSS1500	N_Shore,N_Shore	ZDHHC18,ZDHHC18	NM_032283,NM_032283	hyperM.iPSC
1	27061092	27061174	2	cg13235717,cg16549596	TSS1500,TSS1500	N_Shore,N_Shore	SFN,SFN	NM_006142,NM_006142	hyperM.iPSC
1	27061857	27062266	3	cg11348165,cg06720467,cg13466284	TSS1500,TSS200,1stExon;5'UTR	N_Shore,N_Shore,N_Shore	SFN,SFN,SFN;SFN	NM_006142,NM_006142,NM_006142;NM_006142	hypoM.iPSC
1	27113101	27113281	3	cg16762386,cg16177693,cg01942646	1stExon;5'UTR,TSS200,TSS200	_,_	NR0B2;NR0B2,NR0B2,NR0B2	NM_021969;NM_021969,NM_021969,NM_021969	hyperM.iPSC
1	27114440	27114484	2	cg07914457,cg16985652	TSS1500,TSS1500	_,_	NR0B2,NR0B2	NM_021969,NM_021969	hyperM.iPSC
1	27120362	27120416	2	cg25614889,cg26005232	TSS1500,TSS1500	N_Shore,N_Shore	NUDC,NUDC	NM_006600,NM_006600	hyperM.iPSC
1	27204869	27205832	2	cg27552711,cg02769104	3'UTR,Body	N_Shore,S_Shore	FAM46B,FAM46B	NM_052943,NM_052943	hyperM.iPSC
1	27210510	27211374	2	cg14665203,cg20486246	Body,Body	N_Shore,N_Shore	FAM46B,FAM46B	NM_052943,NM_052943	hypoM.iPSC
1	27351899	27354421	7	cg24738346,cg09725874,cg18594482,cg26515162,cg22481448,cg03769927,cg11743054	Body,Body,1stExon,1stExon,1stExon,1stExon;5'UTR,TSS1500	N_Shelf,N_Shore,N_Shore,N_Shore,N_Shore,N_Shore,S_Shore	SLC9A1,SLC9A1,SLC9A1,SLC9A1,SLC9A1,SLC9A1;SLC9A1,SLC9A1	NM_003047,NM_003047,NM_003047,NM_003047,NM_003047,NM_003047;NM_003047,NM_003047	hyperM.iPSC
1	27520193	27521041	3	cg14162906,cg19160754,cg12399453	TSS1500,TSS1500,TSS200	N_Shore,N_Shore,Island	TMEM222,TMEM222,TMEM222	NM_032125,NM_032125,NM_032125	hyperM.iPSC
1	27540645	27541197	4	cg25471443,cg04608356,cg02576092,cg21604615	TSS1500,TSS200,1stExon;5'UTR,1stExon;5'UTR	_,_	SYTL1,SYTL1,SYTL1;SYTL1,SYTL1;SYTL1	NM_032872,NM_032872,NM_032872;NM_032872,NM_032872;NM_032872	hyperM.iPSC
1	27549827	27550725	5	cg01963906,cg12742432,cg11929842,cg07744618,cg00539261	Body,Body,Body,Body,Body	Island,Island,Island,Island,S_Shore	SYTL1,SYTL1,SYTL1,SYTL1,SYTL1	NM_032872,NM_032872,NM_032872,NM_032872,NM_032872	hypoM.iPSC
1	27558915	27560272	5	cg13449606,cg06507987,cg01730970,cg06035600,cg25133130	Body,Body,Body,Body,Body	N_Shore,N_Shore,Island,Island,Island	MAP3K6,MAP3K6,MAP3K6,MAP3K6,MAP3K6	NM_004672,NM_004672,NM_004672,NM_004672,NM_004672	hypoM.iPSC
1	27573758	27575279	3	cg02365086,cg13082816,cg01719260	Body;Body,TSS1500;TSS1500,TSS1500;TSS1500	_,_	FCN3;FCN3,FCN3;FCN3,FCN3;FCN3	NM_003665;NM_173452,NM_173452;NM_003665,NM_173452;NM_003665	hyperM.iPSC
1	27582162	27582617	3	cg24932660,cg19719807,cg15166089	Body,1stExon,TSS1500	N_Shore,Island,S_Shore	CD164L2,CD164L2,CD164L2	NM_207397,NM_207397,NM_207397	hypoM.iPSC
1	27602388	27602772	4	cg00988346,cg08168580,cg14783891,cg13917151	_,_	_,_	_,_	_,_	hyperM.iPSC
1	27689833	27689898	2	cg26894259,cg08915615	TSS1500,TSS1500	S_Shore,S_Shore	WASF2,WASF2	NM_006990,NM_006990	hyperM.iPSC
1	27721689	27721882	2	cg03604774,cg24527636	_,_	_,_	_,_	_,_	hyperM.iPSC
1	27726384	27727632	4	cg10400390,cg02771890,cg19257356,cg26785800	_,_	N_Shore,Island,Island,S_Shore	_,_	_,_	hypoM.iPSC
1	27756766	27756932	2	cg02576395,cg24534743	5'UTR,5'UTR	_,_	AHDC1,AHDC1	NM_001029882,NM_001029882	hyperM.iPSC
1	27766473	27766512	2	cg00594099,cg17110920	5'UTR,5'UTR	N_Shore,N_Shore	AHDC1,AHDC1	NM_001029882,NM_001029882	hyperM.iPSC
1	27803871	27803897	2	cg11697038,cg17164905	TSS1500,TSS1500	S_Shore,S_Shore	AHDC1,AHDC1	NM_001029882,NM_001029882	hypoM.iPSC
1	27833921	27834608	2	cg05783223,cg09845000	5'UTR,TSS1500	N_Shore,S_Shore	FGR,FGR	NM_005248,NM_005248	hyperM.iPSC
1	27834150	27834333	3	cg14181576,cg09370867,cg16922167	5'UTR,1stExon;5'UTR,TSS200	Island,Island,Island	FGR,FGR;FGR,FGR	NM_005248,NM_005248;NM_005248,NM_005248	hypoM.iPSC
1	27867366	27867565	2	cg12551635,cg07806674	Body;Body;Body,Body;Body;Body	Island,Island	IFI6;IFI6;IFI6,IFI6;IFI6;IFI6	NM_022872;NM_002038;NM_022873,NM_022872;NM_002038;NM_022873	hyperM.iPSC
1	27971435	27971600	2	cg00668034,cg26411822	TSS1500,TSS1500	N_Shore,N_Shore	STX12,STX12	NM_177424,NM_177424	hyperM.iPSC
1	28071038	28071070	2	cg09579933,cg03526503	TSS1500;TSS1500;TSS1500,TSS1500;TSS1500;TSS1500	N_Shore,N_Shore	C1orf38;C1orf38;C1orf38,C1orf38;C1orf38;C1orf38	NM_001105556;NM_004848;NM_001039477,NM_001105556;NM_004848;NM_001039477	hyperM.iPSC
1	28156299	28156687	2	cg03599257,cg03700669	Body,Body	N_Shore,N_Shore	SMPDL3B,SMPDL3B	NM_014474,NM_014474	hyperM.iPSC
1	28434582	28434768	2	cg00033102,cg07318049	TSS1500;TSS1500;TSS1500,TSS1500;TSS1500;TSS1500	N_Shore,N_Shore	ATPIF1;ATPIF1;ATPIF1,ATPIF1;ATPIF1;ATPIF1	NM_016311;NM_178190;NM_178191,NM_016311;NM_178190;NM_178191	hyperM.iPSC
1	28457982	28458328	3	cg02737621,cg06754224,cg08729985	TSS1500,TSS1500,TSS1500	N_Shore,N_Shore,N_Shore	SESN2,SESN2,SESN2	NM_031459,NM_031459,NM_031459	hyperM.iPSC
1	28527069	28528226	9	cg13931707,cg09024430,cg25371560,cg07574385,cg19364137,cg00972603,cg12630974,cg04889884,cg25716286	TSS1500;TSS1500,TSS200;TSS200,TSS200;TSS200,TSS200;TSS200,TSS200;TSS200,TSS200;TSS200,5'UTR;1stExon;1stExon;5'UTR,5'UTR;1stExon;1stExon;5'UTR,5'UTR;1stExon;5'UTR	N_Shore,Island,Island,Island,Island,Island,Island,Island,Island	MED18;MED18,MED18;MED18,MED18;MED18,MED18;MED18,MED18;MED18,MED18;MED18,MED18;MED18;MED18;MED18,MED18;MED18;MED18;MED18,MED18;MED18;MED18	NM_001127350;NM_017638,NM_001127350;NM_017638,NM_001127350;NM_017638,NM_001127350;NM_017638,NM_001127350;NM_017638,NM_001127350;NM_017638,NM_017638;NM_001127350;NM_017638;NM_001127350,NM_017638;NM_001127350;NM_017638;NM_001127350,NM_017638;NM_017638;NM_001127350	hyperM.iPSC
1	28637110	28637618	2	cg08123074,cg00956142	TSS200;Body,Body;Body	_,_	PHACTR4;PHACTR4,PHACTR4;PHACTR4	NM_023923;NM_001048183,NM_023923;NM_001048183	hyperM.iPSC
1	28716323	28716984	4	cg25596287,cg19409133,cg02732067,cg01551176	Body;TSS1500;Body;TSS1500;5'UTR;TSS1500,Body;TSS1500;Body;TSS1500;5'UTR;TSS1500,Body;TSS1500;Body;TSS1500;5'UTR;TSS1500,Body;TSS1500;Body;TSS1500;5'UTR;TSS1500	N_Shore,N_Shore,N_Shore,N_Shore	SNHG3-RCC1;RCC1;SNHG3-RCC1;RCC1;SNHG3-RCC1;RCC1,SNHG3-RCC1;RCC1;SNHG3-RCC1;RCC1;SNHG3-RCC1;RCC1,SNHG3-RCC1;RCC1;SNHG3-RCC1;RCC1;SNHG3-RCC1;RCC1,SNHG3-RCC1;RCC1;SNHG3-RCC1;RCC1;SNHG3-RCC1;RCC1	NR_030725;NM_001269;NR_030726;NM_001048195;NM_001048199;NM_001048194,NR_030725;NM_001269;NR_030726;NM_001048195;NM_001048199;NM_001048194,NR_030725;NM_001269;NR_030726;NM_001048195;NM_001048199;NM_001048194,NR_030725;NM_001269;NR_030726;NM_001048195;NM_001048199;NM_001048194	hyperM.iPSC
1	28778160	28778969	3	cg12640482,cg19712659,cg15601452	Body;TSS1500,Body;TSS1500;Body,Body;TSS1500;Body	N_Shelf,N_Shore,N_Shore	SNHG12;SNORD99,SNHG12;SNORD99;SNORA61,SNHG12;SNORD99;SNORA61	NR_024127;NR_003077,NR_024127;NR_003077;NR_002987,NR_024127;NR_003077;NR_002987	hyperM.iPSC
1	28781545	28781592	2	cg11753765,cg01198591	TSS1500;TSS1500,TSS1500;TSS1500	S_Shore,S_Shore	SNORA16A;SNHG12,SNORA16A;SNHG12	NR_003035;NR_024127,NR_003035;NR_024127	hyperM.iPSC
1	28800912	28801140	3	cg02579668,ch.1.28801127F,ch.1.28801140F	_,_	_,_	_,_	_,_	hyperM.iPSC
1	28867437	28867574	2	cg24675730,cg11336539	TSS1500;TSS1500,TSS1500;TSS1500	_,_	GMEB1;GMEB1,GMEB1;GMEB1	NM_006582;NM_024482,NM_006582;NM_024482	hyperM.iPSC
1	28935276	28935446	2	cg03731740,cg25273602	TSS1500,TSS1500	N_Shore,N_Shore	YTHDF2,YTHDF2	NM_016258,NM_016258	hypoM.iPSC
1	28974436	28974655	3	cg22861340,cg00151709,cg10387543	_,_	Island,Island,Island	_,_	_,_	hyperM.iPSC
1	29012109	29012345	2	cg09970593,cg06779961	Body,Body	S_Shore,S_Shore	OPRD1,OPRD1	NM_000911,NM_000911	hyperM.iPSC
1	29085813	29085954	3	cg25727366,cg25287272,cg11226328	TSS1500;TSS1500;TSS1500;TSS1500;TSS1500,TSS1500;TSS1500;TSS1500;TSS1500;TSS1500,TSS1500;TSS1500;TSS1500;TSS1500;TSS1500	N_Shore,N_Shore,N_Shore	EPB41;EPB41;EPB41;EPB41;EPB41,EPB41;EPB41;EPB41;EPB41;EPB41,EPB41;EPB41;EPB41;EPB41;EPB41	NM_001166007;NM_203343;NM_203342;NM_001166005;NM_004437,NM_001166007;NM_203343;NM_203342;NM_001166005;NM_004437,NM_001166007;NM_203343;NM_203342;NM_001166005;NM_004437	hypoM.iPSC
1	29113120	29113218	2	cg12400725,cg08139234	5'UTR;5'UTR;5'UTR;TSS1500;5'UTR;5'UTR,5'UTR;5'UTR;5'UTR;TSS1500;5'UTR;5'UTR	N_Shore,N_Shore	EPB41;EPB41;EPB41;EPB41;EPB41;EPB41,EPB41;EPB41;EPB41;EPB41;EPB41;EPB41	NM_203342;NM_203343;NM_004437;NM_001166006;NM_001166007;NM_001166005,NM_203342;NM_203343;NM_004437;NM_001166006;NM_001166007;NM_001166005	hyperM.iPSC
1	29318672	29319280	2	cg26144567,cg03357664	3'UTR;3'UTR;3'UTR;3'UTR;3'UTR;3'UTR,3'UTR	N_Shore,N_Shore	EPB41;EPB41;EPB41;EPB41;TMEM200B;EPB41,TMEM200B	NM_001166007;NM_004437;NM_203343;NM_001166005;NM_001003682;NM_203342,NM_001003682	hyperM.iPSC
1	29320287	29320558	2	cg00553833,cg25840576	Body,Body	Island,Island	TMEM200B,TMEM200B	NM_001003682,NM_001003682	hypoM.iPSC
1	29429603	29430407	3	cg00035847,cg11797145,cg12802086	Body;5'UTR,TSS1500;TSS1500,TSS1500;TSS1500	N_Shore,S_Shore,S_Shore	MECR;MECR,MECR;MECR,MECR;MECR	NM_016011;NM_001024732,NM_001024732;NM_016011,NM_001024732;NM_016011	hyperM.iPSC
1	29437686	29437893	3	cg22795471,cg17670650,cg05673731	Body;Body;Body,Body;Body;Body,Body;Body;Body	Island,Island,Island	PTPRU;PTPRU;PTPRU,PTPRU;PTPRU;PTPRU,PTPRU;PTPRU;PTPRU	NM_133178;NM_133177;NM_005704,NM_133178;NM_133177;NM_005704,NM_133178;NM_133177;NM_005704	hypoM.iPSC
1	29459704	29460077	4	cg05694921,cg17592853,cg00160667,cg08527313	Body;Body;Body,Body;Body;Body,Body;Body;Body,Body;Body;Body	Island,Island,Island,S_Shore	PTPRU;PTPRU;PTPRU,PTPRU;PTPRU;PTPRU,PTPRU;PTPRU;PTPRU,PTPRU;PTPRU;PTPRU	NM_133178;NM_133177;NM_005704,NM_133178;NM_133177;NM_005704,NM_133178;NM_133177;NM_005704,NM_133178;NM_133177;NM_005704	hypoM.iPSC
1	29549054	29549130	2	cg23955860,cg07423997	_,_	_,_	_,_	_,_	hyperM.iPSC
1	29934167	29934252	2	cg10103002,cg10585371	_,_	_,_	_,_	_,_	hyperM.iPSC
1	30145818	30146652	2	cg26796036,cg02279503	_,_	_,_	_,_	_,_	hyperM.iPSC
1	30968999	30970500	5	cg12473000,cg24531825,cg17461278,cg01022916,cg25408960	1stExon;5'UTR,1stExon;5'UTR,TSS200,TSS1500,TSS1500	S_Shore,S_Shore,S_Shore,S_Shelf,S_Shelf	MATN1;MATN1,MATN1;MATN1,MATN1,MATN1,MATN1	NM_002379;NM_002379,NM_002379;NM_002379,NM_002379,NM_002379,NM_002379	hyperM.iPSC
1	31001709	31002156	2	cg17418085,cg19919590	Body,Body	_,_	LAPTM5,LAPTM5	NM_006762,NM_006762	hyperM.iPSC
1	31018042	31018866	4	cg00328870,cg25112284,cg27538091,cg23937078	_,_	N_Shore,Island,Island,Island	_,_	_,_	hyperM.iPSC
1	31433513	31434588	3	cg23732779,cg02805810,cg24354039	1stExon,TSS200,TSS1500	_,_	NKAIN1,NKAIN1,NKAIN1	NM_024522,NM_024522,NM_024522	hyperM.iPSC
1	31760944	31761166	2	cg16530130,cg18975659	Body,Body	_,_	LOC284551,LOC284551	NR_027085,NR_027085	hyperM.iPSC
1	31814094	31814520	3	cg16103203,cg10530055,cg00541683	TSS1500,TSS1500,TSS200	_,_	TINAGL1,TINAGL1,TINAGL1	NM_022164,NM_022164,NM_022164	hyperM.iPSC
1	31824833	31825238	3	cg00565263,cg12206571,cg17945560	Body,Body,3'UTR	N_Shore,Island,Island	TINAGL1,TINAGL1,TINAGL1	NM_022164,NM_022164,NM_022164	hyperM.iPSC
1	31827047	31827423	3	cg24253618,cg12905085,cg10574365	_,_	Island,Island,Island	_,_	_,_	hyperM.iPSC
1	31856916	31857705	2	cg02309594,cg18082979	5'UTR,Body	S_Shore,S_Shore	HCRTR1,HCRTR1	NM_001525,NM_001525	hyperM.iPSC
1	31943516	31943637	2	cg04852949,cg09255732	TSS1500,TSS1500	S_Shore,S_Shore	COL16A1,COL16A1	NM_001856,NM_001856	hyperM.iPSC
1	31980287	31981124	3	cg20975182,cg00901198,cg06871798	Body,Body,Body	N_Shore,N_Shore,Island	BAI2,BAI2,BAI2	NM_001703,NM_001703,NM_001703	hyperM.iPSC
1	31992364	31992776	2	cg00547484,cg20608783	Body,Body	N_Shelf,N_Shore	BAI2,BAI2	NM_001703,NM_001703	hyperM.iPSC
1	31994475	31994565	2	cg16767915,cg21822140	Body,Body	Island,Island	BAI2,BAI2	NM_001703,NM_001703	hyperM.iPSC
1	31999522	32000495	2	cg03147838,cg04161902	5'UTR,5'UTR	N_Shore,N_Shore	BAI2,BAI2	NM_001703,NM_001703	hypoM.iPSC
1	32010510	32011247	4	cg04878000,cg03774520,cg15694605,cg10505580	_,_	Island,Island,Island,Island	_,_	_,_	hyperM.iPSC
1	32036810	32036902	2	cg05944260,cg23268630	Body,Body	_,_	SPOCD1,SPOCD1	NM_144569,NM_144569	hyperM.iPSC
1	32054047	32054252	3	cg22169053,cg15789095,cg07802625	5'UTR,5'UTR,TSS200	_,_	SPOCD1,SPOCD1,SPOCD1	NM_144569,NM_144569,NM_144569	hypoM.iPSC
1	32310529	32310562	2	cg09325164,cg09888231	TSS1500,TSS1500	N_Shore,N_Shore	TMEM39B,TMEM39B	NM_018056,NM_018056	hyperM.iPSC
1	32417614	32417647	2	cg03523740,cg04031504	TSS1500,TSS1500	N_Shore,N_Shore	TXLNA,TXLNA	NM_175852,NM_175852	hyperM.iPSC
1	32446928	32447404	2	cg00293644,cg00965643	TSS1500,1stExon	S_Shelf,S_Shelf	DCDC2B,DCDC2B	NM_001099434,NM_001099434	hyperM.iPSC
1	32453955	32454582	2	cg00853979,cg15726025	Body,3'UTR	_,_	DCDC2B,C1orf91	NM_001099434,NM_019118	hyperM.iPSC
1	32480928	32481072	2	cg01627483,cg02830936	TSS1500,TSS1500	S_Shore,S_Shore	MTMR9L,MTMR9L	NR_026850,NR_026850	hyperM.iPSC
1	32486733	32486895	3	cg14258143,cg19776942,cg22602019	Body,Body,3'UTR	Island,Island,S_Shore	FAM167B,FAM167B,FAM167B	NM_032648,NM_032648,NM_032648	hypoM.iPSC
1	32488799	32489548	2	cg01525376,cg05350315	TSS1500,5'UTR;1stExon	S_Shelf,S_Shelf	LCK,LCK;LCK	NM_005356,NM_005356;NM_005356	hyperM.iPSC
1	32513345	32514624	3	cg19508561,cg15116327,cg04503267	Body;Body,Body;Body,Body;Body	Island,S_Shore,S_Shore	LCK;LCK,LCK;LCK,LCK;LCK	NM_005356;NM_001042771,NM_005356;NM_001042771,NM_005356;NM_001042771	hyperM.iPSC
1	32529881	32529954	2	cg24468890,cg15713729	TSS1500,TSS1500	N_Shore,N_Shore	HDAC1,HDAC1	NM_004964,NM_004964	hyperM.iPSC
1	32664412	32665953	4	cg01586952,cg03439662,cg04718145,cg21932400	_,_	N_Shore,N_Shore,Island,S_Shore	_,_	_,_	hyperM.iPSC
1	32933378	32933487	2	cg05342835,cg17339202	Body;Body,Body;Body	_,_	SYNC;SYNC,SYNC;SYNC	NM_030786;NM_001161708,NM_030786;NM_001161708	hyperM.iPSC
1	32942145	32942437	2	cg04551500,cg12634957	TSS1500;TSS1500,TSS1500;TSS1500	S_Shore,S_Shore	SYNC;SYNC,SYNC;SYNC	NM_030786;NM_001161708,NM_030786;NM_001161708	hyperM.iPSC
1	33003859	33003969	4	cg21167532,cg12478578,cg09804503,cg04892182	Body,Body,Body,Body	_,_	KIAA1522,KIAA1522,KIAA1522,KIAA1522	NM_020888,NM_020888,NM_020888,NM_020888	hypoM.iPSC
1	33119815	33120702	2	cg15125626,cg09510416	_,_	_,N_Shelf	_,_	_,_	hyperM.iPSC
1	33124155	33124348	4	cg12140975,cg11524235,cg24417499,cg21604358	TSS1500,TSS1500,TSS1500,TSS1500	N_Shore,N_Shore,N_Shore,Island	HPCA,HPCA,HPCA,HPCA	NM_002143,NM_002143,NM_002143,NM_002143	hyperM.iPSC
1	33275342	33275397	2	cg15822908,cg01620569	TSS1500;TSS1500,TSS1500;TSS1500	S_Shore,S_Shore	AK2;AK2,AK2;AK2	NM_001625;NM_013411,NM_001625;NM_013411	hyperM.iPSC
1	33318738	33319004	2	cg02350320,cg12731430	TSS1500,TSS1500	N_Shore,N_Shore	ADC,ADC	NM_052998,NM_052998	hyperM.iPSC
1	33399696	33399742	2	cg06851000,cg10975001	Body,Body	S_Shore,S_Shore	TRIM62,TRIM62	NM_018207,NM_018207	hyperM.iPSC
1	33416863	33417358	2	cg10503992,cg01676680	Body,Body	N_Shelf,N_Shore	TRIM62,TRIM62	NM_018207,NM_018207	hyperM.iPSC
1	33421235	33421406	4	cg25274008,cg25342005,cg15575967,cg03036777	TSS1500,TSS1500,TSS1500,TSS1500	S_Shore,S_Shore,S_Shore,S_Shore	TRIM62,TRIM62,TRIM62,TRIM62	NM_018207,NM_018207,NM_018207,NM_018207	hyperM.iPSC
1	33514676	33514956	3	cg00007036,cg17422088,cg18238718	Body,Body,Body	Island,Island,Island	ZNF362,ZNF362,ZNF362	NM_152493,NM_152493,NM_152493	hypoM.iPSC
1	33572290	33572760	2	cg06179749,cg20322433	Body;Body,5'UTR;Body	_,_	PHC2;PHC2,PHC2;PHC2	NM_004427;NM_198040,NM_004427;NM_198040	hyperM.iPSC
1	33585908	33586332	2	cg07570498,cg06763161	5'UTR;Body,5'UTR;Body	N_Shore,N_Shore	PHC2;PHC2,PHC2;PHC2	NM_004427;NM_198040,NM_004427;NM_198040	hyperM.iPSC
1	33710020	33710269	2	cg01219205,cg27303855	TSS1500,TSS1500	N_Shore,N_Shore	ZSCAN20,ZSCAN20	NM_145238,NM_145238	hyperM.iPSC
1	33947756	33947904	2	cg11401957,cg08247053	Body,Body	_,_	CSMD2,CSMD2	NM_052896,NM_052896	hyperM.iPSC
1	34193460	34193507	2	cg24941457,cg15207669	Body,Body	_,_	CSMD2,CSMD2	NM_052896,NM_052896	hyperM.iPSC
1	34405160	34405653	2	cg25772827,cg06964608	TSS200;TSS1500,5'UTR	S_Shore,S_Shelf	C1orf94;CSMD2,C1orf94	NM_032884;NM_052896,NM_032884	hyperM.iPSC
1	34414298	34415693	10	cg24435884,cg26226879,cg27557134,cg16384849,cg24411961,cg02656891,cg22697574,cg16348470,cg04025150,cg18328755	5'UTR;TSS1500,5'UTR;TSS1500,5'UTR;TSS1500,5'UTR;TSS200,5'UTR;TSS200,5'UTR;TSS200,5'UTR;1stExon;5'UTR,5'UTR;1stExon;5'UTR,5'UTR;1stExon;5'UTR,5'UTR;1stExon;5'UTR	N_Shore,N_Shore,N_Shore,Island,Island,Island,Island,Island,Island,S_Shore	C1orf94;C1orf94,C1orf94;C1orf94,C1orf94;C1orf94,C1orf94;C1orf94,C1orf94;C1orf94,C1orf94;C1orf94,C1orf94;C1orf94;C1orf94,C1orf94;C1orf94;C1orf94,C1orf94;C1orf94;C1orf94,C1orf94;C1orf94;C1orf94	NM_032884;NM_001134734,NM_032884;NM_001134734,NM_032884;NM_001134734,NM_032884;NM_001134734,NM_032884;NM_001134734,NM_032884;NM_001134734,NM_001134734;NM_001134734;NM_032884,NM_001134734;NM_001134734;NM_032884,NM_001134734;NM_001134734;NM_032884,NM_001134734;NM_001134734;NM_032884	hyperM.iPSC
1	34416839	34417696	2	cg04486873,cg00124902	Body;5'UTR,Body;5'UTR	S_Shore,S_Shelf	C1orf94;C1orf94,C1orf94;C1orf94	NM_001134734;NM_032884,NM_001134734;NM_032884	hyperM.iPSC
1	34992811	34993297	4	cg00648558,cg07014349,cg25373430,cg25732104	TSS1500,TSS200,TSS200,TSS200	_,_	GJB5,GJB5,GJB5,GJB5	NM_005268,NM_005268,NM_005268,NM_005268	hyperM.iPSC
1	34995642	34996651	5	cg17102325,cg21206180,cg13170235,cg21472953,cg06536967	Body,Body,Body,3'UTR;TSS1500,3'UTR;TSS1500	N_Shelf,N_Shelf,N_Shelf,N_Shelf,N_Shelf	GJB5,GJB5,GJB5,GJB5;GJB4,GJB5;GJB4	NM_005268,NM_005268,NM_005268,NM_005268;NM_153212,NM_005268;NM_153212	hyperM.iPSC
1	35018583	35019313	3	cg03760490,cg13488851,cg00259249	TSS1500,TSS1500,TSS200;TSS1500	N_Shore,N_Shore,N_Shore	GJB3,GJB3,GJB3;GJB3	NM_024009,NM_024009,NM_024009;NM_001005752	hyperM.iPSC
1	35030062	35030648	3	cg21408294,cg00416130,cg02902318	TSS1500,TSS1500,TSS1500	N_Shore,N_Shore,N_Shore	GJA4,GJA4,GJA4	NM_002060,NM_002060,NM_002060	hyperM.iPSC
1	35032333	35032653	3	cg02480666,cg01716680,cg13967936	5'UTR,5'UTR,Body	S_Shore,S_Shore,S_Shore	GJA4,GJA4,GJA4	NM_002060,NM_002060,NM_002060	hyperM.iPSC
1	35164356	35164895	2	cg18788313,cg14420116	_,_	N_Shelf,N_Shelf	_,_	_,_	hyperM.iPSC
1	35358945	35359236	5	cg25035631,cg12901910,cg09834465,cg07105947,cg14615266	_,_	Island,Island,Island,Island,S_Shore	_,_	_,_	hyperM.iPSC
1	35428912	35429289	2	cg20797674,cg03515869	Body,Body	N_Shore,N_Shore	SFPQ,SFPQ	NM_005066,NM_005066	hyperM.iPSC
1	35686369	35686668	2	cg22526531,cg13877715	Body,Body	_,_	KIAA0319L,KIAA0319L	NM_024874,NM_024874	hyperM.iPSC
1	35689459	35689942	2	cg12212217,cg11983385	Body,Body	_,_	KIAA0319L,KIAA0319L	NM_024874,NM_024874	hyperM.iPSC
1	35798781	35799198	3	cg19865916,cg18125241,cg22402261	Body;Body;Body,Body;Body;Body,Body;Body;Body	S_Shelf,S_Shelf,S_Shelf	NCDN;NCDN;NCDN,NCDN;NCDN;NCDN,NCDN;NCDN;NCDN	NM_001014841;NM_014284;NM_001014839,NM_001014841;NM_014284;NM_001014839,NM_001014841;NM_014284;NM_001014839	hyperM.iPSC
1	35815671	35816220	3	cg22436429,cg12038696,cg08424184	Body,Body,Body	Island,Island,S_Shore	TFAP2E,TFAP2E,TFAP2E	NM_178548,NM_178548,NM_178548	hypoM.iPSC
1	35880812	35880820	2	cg21680327,cg21439896	TSS1500,TSS1500	S_Shore,S_Shore	PSMB2,PSMB2	NM_002794,NM_002794	hyperM.iPSC
1	36169590	36170523	2	cg03397389,cg21837323	1stExon;1stExon;5'UTR;5'UTR,5'UTR;Body	Island,S_Shore	EIF2C3;EIF2C3;EIF2C3;EIF2C3,EIF2C3;EIF2C3	NM_177422;NM_024852;NM_177422;NM_024852,NM_177422;NM_024852	hyperM.iPSC
1	36325546	36326913	5	cg00836308,cg19252108,cg17877898,cg06814637,cg12277532	Body;TSS1500,Body;TSS1500,Body;TSS1500,TSS200,TSS200	N_Shore,N_Shore,N_Shore,N_Shore,Island	TEKT2;ADPRHL2,TEKT2;ADPRHL2,TEKT2;ADPRHL2,ADPRHL2,ADPRHL2	NM_014466;NM_017825,NM_014466;NM_017825,NM_014466;NM_017825,NM_017825,NM_017825	hyperM.iPSC
1	36338443	36338747	2	cg19046959,cg22380322	TSS200,TSS1500	_,_	COL8A2,COL8A2	NM_005202,NM_005202	hyperM.iPSC
1	36388432	36388617	3	cg00039326,cg08909156,cg19822229	TSS1500,TSS1500,TSS1500	S_Shore,S_Shore,S_Shore	TRAPPC3,TRAPPC3,TRAPPC3	NM_014408,NM_014408,NM_014408	hyperM.iPSC
1	36416568	36417436	5	cg05364072,cg19002149,cg13962153,cg08458912,cg11084518	Body,Body,Body,Body,Body	Island,Island,Island,Island,S_Shore	MAP7D1,MAP7D1,MAP7D1,MAP7D1,MAP7D1	NM_018067,NM_018067,NM_018067,NM_018067,NM_018067	hypoM.iPSC
1	36461885	36462064	2	cg23691858,cg13134448	TSS1500,TSS1500	N_Shore,N_Shore	THRAP3,THRAP3	NM_005119,NM_005119	hyperM.iPSC
1	36625050	36625543	2	cg17971578,cg00913954	TSS1500,TSS1500	S_Shore,S_Shore	STK40,STK40	NM_032017,NM_032017	hyperM.iPSC
1	36688291	36689088	4	cg12809031,cg27439456,cg08878450,cg22397854	Body;Body,Body;Body,1stExon;1stExon,TSS1500;TSS1500	N_Shore,Island,Island,S_Shore	OSCP1;OSCP1,OSCP1;OSCP1,OSCP1;OSCP1,OSCP1;OSCP1	NM_206837;NM_145047,NM_206837;NM_145047,NM_145047;NM_206837,NM_145047;NM_206837	hyperM.iPSC
1	36710432	36710732	2	cg17219729,cg11227872	Body;Body;Body;Body,Body;Body;Body;Body	_,_	CSF3R;CSF3R;CSF3R;CSF3R,CSF3R;CSF3R;CSF3R;CSF3R	NM_156038;NM_156039;NM_000760;NM_172313,NM_156038;NM_156039;NM_000760;NM_172313	hyperM.iPSC
1	36720900	36722320	5	cg11674933,cg14523574,cg13084345,cg07285167,cg18761349	5'UTR;5'UTR;5'UTR;5'UTR,TSS200;TSS200;TSS200;TSS200,TSS1500;TSS1500;TSS1500;TSS1500,TSS1500;TSS1500;TSS1500;TSS1500,TSS1500;TSS1500;TSS1500;TSS1500	_,_	CSF3R;CSF3R;CSF3R;CSF3R,CSF3R;CSF3R;CSF3R;CSF3R,CSF3R;CSF3R;CSF3R;CSF3R,CSF3R;CSF3R;CSF3R;CSF3R,CSF3R;CSF3R;CSF3R;CSF3R	NM_156039;NM_000760;NM_156038;NM_172313,NM_156038;NM_156039;NM_000760;NM_172313,NM_172313;NM_000760;NM_156038;NM_156039,NM_172313;NM_000760;NM_156038;NM_156039,NM_172313;NM_000760;NM_156038;NM_156039	hyperM.iPSC
1	36829356	36829552	2	cg08903855,cg18769374	_,_	_,_	_,_	_,_	hyperM.iPSC
1	37110414	37110464	2	cg14992273,cg09134640	Body,Body	_,_	GRIK3,GRIK3	NM_000831,NM_000831	hyperM.iPSC
1	37286017	37286077	2	cg14178083,cg16557698	_,_	_,_	_,_	_,_	hyperM.iPSC
1	37493513	37493544	2	cg10105794,cg17465112	_,_	_,_	_,_	_,_	hyperM.iPSC
1	37546400	37546490	3	cg05589454,cg11202686,cg02902637	_,_	_,_	_,_	_,_	hyperM.iPSC
1	37556458	37556831	4	cg04851505,cg03085170,cg05846868,cg01765111	_,_	Island,Island,Island,Island	_,_	_,_	hyperM.iPSC
1	37713400	37714441	3	cg16371538,cg19872095,cg01937809	5'UTR,Body,Body	S_Shore,S_Shore,S_Shore	ZC3H12A,ZC3H12A,ZC3H12A	NM_025079,NM_025079,NM_025079	hyperM.iPSC
1	37927954	37928126	3	cg22501998,cg01933946,cg00308767	Body,Body,Body	N_Shore,N_Shore,N_Shore	C1orf109,C1orf109,C1orf109	NM_017850,NM_017850,NM_017850	hyperM.iPSC
1	37999399	38000295	5	cg12548638,cg12746947,cg11521434,cg01379846,cg12012383	3'UTR;Body,Body;Body,Body;Body,Body;Body,Body;Body	N_Shore,Island,Island,Island,Island	EPHA10;EPHA10,EPHA10;EPHA10,EPHA10;EPHA10,EPHA10;EPHA10,EPHA10;EPHA10	NM_173641;NM_001099439,NM_173641;NM_001099439,NM_173641;NM_001099439,NM_173641;NM_001099439,NM_173641;NM_001099439	hyperM.iPSC
1	38002063	38004812	12	cg01967642,cg12158389,cg12128017,cg18537001,cg21306240,cg06163371,cg00667938,cg21439231,cg26653529,cg01796781,cg00013409,cg10122079	Body;Body,Body;Body,1stExon;5'UTR;1stExon;5'UTR,TSS200;TSS200,TSS200;TSS200,TSS200;TSS200,TSS1500;TSS1500,TSS1500;TSS1500,TSS1500;TSS1500,TSS1500;TSS1500,TSS1500;TSS1500,TSS1500;TSS1500	N_Shore,Island,Island,Island,Island,Island,S_Shore,S_Shore,S_Shore,S_Shore,S_Shore,S_Shore	EPHA10;EPHA10,EPHA10;EPHA10,EPHA10;EPHA10;EPHA10;EPHA10,EPHA10;EPHA10,EPHA10;EPHA10,EPHA10;EPHA10,EPHA10;EPHA10,EPHA10;EPHA10,EPHA10;EPHA10,EPHA10;EPHA10,EPHA10;EPHA10,EPHA10;EPHA10	NM_173641;NM_001099439,NM_173641;NM_001099439,NM_173641;NM_173641;NM_001099439;NM_001099439,NM_001099439;NM_173641,NM_001099439;NM_173641,NM_001099439;NM_173641,NM_001099439;NM_173641,NM_001099439;NM_173641,NM_001099439;NM_173641,NM_001099439;NM_173641,NM_001099439;NM_173641,NM_001099439;NM_173641	hyperM.iPSC
1	38032870	38033644	4	cg18105315,cg02851558,cg04219099,cg24433287	1stExon;1stExon;TSS1500,Body;Body;TSS200,Body;Body;TSS200,Body;Body;TSS200	Island,S_Shore,S_Shore,S_Shore	MANEAL;MANEAL;MANEAL,MANEAL;MANEAL;MANEAL,MANEAL;MANEAL;MANEAL,MANEAL;MANEAL;MANEAL	NM_001031740;NM_001113482;NM_152496,NM_001113482;NM_001031740;NM_152496,NM_001113482;NM_001031740;NM_152496,NM_001113482;NM_001031740;NM_152496	hyperM.iPSC
1	38239131	38239264	2	cg08423562,cg21680719	5'UTR,5'UTR	_,N_Shelf	FHL3,FHL3	NM_004468,NM_004468	hyperM.iPSC
1	38250508	38250670	2	cg11425754,cg17428744	TSS1500,TSS1500	N_Shore,Island	UTP11L,UTP11L	NM_016037,NM_016037	hyperM.iPSC
1	38372213	38372786	4	cg26164879,cg03331978,cg25879102,cg24080008	_,_	_,_	_,_	_,_	hyperM.iPSC
1	38451959	38452644	2	cg04233421,cg03005062	_,_	_,_	_,_	_,_	hyperM.iPSC
1	38660012	38661376	3	ch.1.38660012F,ch.1.1224902R,cg18186327	_,_	_,_	_,_	_,_	hyperM.iPSC
1	38808521	38808569	2	cg06865451,cg18270687	_,_	_,_	_,_	_,_	hyperM.iPSC
1	38817636	38818567	3	cg16924985,cg03743675,cg27292870	_,_	S_Shore,S_Shore,S_Shore	_,_	_,_	hyperM.iPSC
1	38958367	38958738	2	cg05161980,cg02920235	_,_	_,_	_,_	_,_	hyperM.iPSC
1	39021902	39022251	5	cg11391637,cg18150908,cg26113488,cg14667685,cg12410921	_,_	_,_	_,_	_,_	hyperM.iPSC
1	39041988	39042124	2	cg16992161,cg06556218	_,_	N_Shore,N_Shore	_,_	_,_	hyperM.iPSC
1	39053753	39054313	3	cg19250639,cg13976375,cg23237972	_,_	N_Shelf,N_Shore,N_Shore	_,_	_,_	hyperM.iPSC
1	39112140	39112270	2	cg01515913,cg10557460	TSS1500,TSS1500	S_Shore,S_Shore	MYCBP,MYCBP	NM_012333,NM_012333	hyperM.iPSC
1	39179974	39180585	4	cg25314315,cg08209422,cg10500653,cg15120848	1stExon;5'UTR,TSS200,TSS200,TSS1500	_,_	RHBDL2;RHBDL2,RHBDL2,RHBDL2,RHBDL2	NM_017821;NM_017821,NM_017821,NM_017821,NM_017821	hyperM.iPSC
1	39320505	39320588	2	cg20286956,cg11676353	5'UTR,5'UTR	Island,S_Shore	MACF1,MACF1	NM_012090,NM_012090	hypoM.iPSC
1	39648374	39648646	2	cg05957749,cg19589131	5'UTR;1stExon;Body;Body,1stExon;Body;Body	S_Shore,S_Shore	KIAA0754;KIAA0754;MACF1;MACF1,KIAA0754;MACF1;MACF1	NM_015038;NM_015038;NM_012090;NM_033044,NM_015038;NM_012090;NM_033044	hyperM.iPSC
1	39812603	39813076	2	cg01858866,cg24142464	Body;Body;Body,Body;Body;Body	N_Shore,N_Shore	PABPC4;PABPC4;PABPC4,PABPC4;PABPC4;PABPC4	NM_001135654;NM_003819;NM_001135653,NM_001135654;NM_003819;NM_001135653	hyperM.iPSC
1	39878254	39878293	3	cg17449954,cg17602126,cg12160637	TSS1500,TSS1500,TSS1500	Island,Island,Island	HEYL,HEYL,HEYL	NM_014571,NM_014571,NM_014571	hypoM.iPSC
1	39921968	39922865	2	cg25375186,cg08947181	Body,5'UTR	N_Shore,S_Shore	HPCAL4,HPCAL4	NM_016257,NM_016257	hyperM.iPSC
1	39977823	39977853	2	cg12051614,cg00546153	5'UTR;Body;Body,5'UTR;Body;Body	S_Shore,S_Shore	PPIE;PPIE;PPIE,PPIE;PPIE;PPIE	NM_203457;NM_006112;NM_203456,NM_203457;NM_006112;NM_203456	hyperM.iPSC
1	40007959	40008712	2	cg23599683,cg11296826	Body;1stExon;3'UTR,Body;1stExon	N_Shore,Island	BMP8B;OXCT2;OXCT2,BMP8B;OXCT2	NM_001720;NM_022120;NM_022120,NM_001720;NM_022120	hyperM.iPSC
1	40122274	40122639	4	cg04921771,cg22691587,cg02965157,cg10024100	TSS1500,TSS1500,TSS1500,TSS1500	S_Shore,S_Shore,S_Shore,S_Shore	TRIT1,TRIT1,TRIT1,TRIT1	NM_017646,NM_017646,NM_017646,NM_017646	hyperM.iPSC
1	40134497	40135494	2	cg12583369,cg13363823	3'UTR;3'UTR,3'UTR;3'UTR	_,N_Shelf	MYCL1;MYCL1,MYCL1;MYCL1	NM_001033082;NM_001033081,NM_001033082;NM_001033081	hyperM.iPSC
1	40160810	40160982	3	cg02630477,cg04218880,cg15196156	_,_	_,_	_,_	_,_	hypoM.iPSC
1	40192886	40193090	2	cg01869896,cg27173717	TSS1500;TSS1500,TSS1500;TSS1500	N_Shore,Island	MFSD2A;MFSD2A,MFSD2A;MFSD2A	NM_032793;NM_001136493,NM_032793;NM_001136493	hyperM.iPSC
1	40370981	40371359	4	cg01015662,cg07405182,cg13451356,cg16555417	_,_	N_Shore,N_Shore,Island,Island	_,_	_,_	hyperM.iPSC
1	40399186	40399323	2	cg18646240,cg20929609	TSS1500,TSS1500	N_Shore,N_Shore	RLF,RLF	NM_012421,NM_012421	hyperM.iPSC
1	40542256	40542331	2	cg02576915,cg26791464	Body,Body	Island,Island	COL9A2,COL9A2	NM_001852,NM_001852	hyperM.iPSC
1	40715212	40715233	2	cg22024760,cg14198472	TSS1500,TSS1500	N_Shore,N_Shore	ZNF642,ZNF642	NM_198494,NM_198494	hyperM.iPSC
1	40891357	40891870	3	cg13247117,cg03515933,cg03017091	5'UTR,5'UTR,5'UTR	N_Shore,N_Shore,N_Shore	RIMS3,RIMS3,RIMS3	NM_014747,NM_014747,NM_014747	hyperM.iPSC
1	40901461	40902342	2	cg13935127,cg24517738	5'UTR,5'UTR	N_Shelf,N_Shore	RIMS3,RIMS3	NM_014747,NM_014747	hyperM.iPSC
1	40929317	40929662	2	cg15986668,cg14796708	TSS1500;TSS1500;TSS1500;Body;TSS1500;TSS1500,TSS200;TSS200;TSS200;Body;TSS1500;TSS200	N_Shore,N_Shore	NFYC;NFYC;NFYC;LOC100130557;NFYC;NFYC,NFYC;NFYC;NFYC;LOC100130557;NFYC;NFYC	NM_001142587;NM_001142589;NM_001142588;NR_024567;NM_014223;NM_001142590,NM_001142588;NM_014223;NM_001142589;NR_024567;NM_001142590;NM_001142587	hypoM.iPSC
1	41040081	41041080	2	cg03640258,cg05307301	Body;Body,Body;Body	N_Shore,S_Shore	KCNQ4;KCNQ4,KCNQ4;KCNQ4	NM_004700;NM_172163,NM_004700;NM_172163	hyperM.iPSC
1	41076157	41076692	2	cg07906262,cg23109867	Body;Body,Body;Body	Island,Island	KCNQ4;KCNQ4,KCNQ4;KCNQ4	NM_004700;NM_172163,NM_004700;NM_172163	hyperM.iPSC
1	41217238	41217280	2	cg17045772,cg01002622	TSS1500,TSS1500	N_Shore,N_Shore	CTPS,CTPS	NM_001905,NM_001905	hypoM.iPSC
1	41259680	41259995	3	cg08733496,cg02290550,cg22435441	5'UTR;5'UTR,1stExon;1stExon;5'UTR;5'UTR,1stExon;5'UTR;TSS200	S_Shelf,S_Shelf,S_Shelf	SLFNL1;SLFNL1,SLFNL1;SLFNL1;SLFNL1;SLFNL1,SLFNL1;SLFNL1;SLFNL1	NM_001168247;NM_144990,NM_001168247;NM_144990;NM_001168247;NM_144990,NM_144990;NM_144990;NM_001168247	hyperM.iPSC
1	41661894	41662212	2	cg11706129,cg20078206	_,_	Island,Island	_,_	_,_	hyperM.iPSC
1	41722949	41724808	4	cg08460875,cg14978637,cg16736826,cg27438425	TSS200,TSS1500,TSS1500,_	_,_	EDN2,EDN2,EDN2,_	NM_001956,NM_001956,NM_001956,_	hyperM.iPSC
1	41899311	41900018	3	cg24351658,cg08915922,cg21415643	5'UTR;5'UTR,5'UTR;5'UTR,5'UTR;5'UTR	N_Shore,Island,Island	HIVEP3;HIVEP3,HIVEP3;HIVEP3,HIVEP3;HIVEP3	NM_024503;NM_001127714,NM_024503;NM_001127714,NM_024503;NM_001127714	hyperM.iPSC
1	42156897	42157747	6	cg23762517,cg25607920,cg26038582,cg03884592,cg15937073,cg17098103	1stExon;1stExon;5'UTR;5'UTR,1stExon;1stExon;5'UTR;5'UTR,1stExon;1stExon;5'UTR;5'UTR,1stExon;1stExon;5'UTR;5'UTR,TSS200;TSS200,TSS1500;TSS1500	S_Shore,S_Shore,S_Shore,S_Shore,S_Shore,S_Shore	HIVEP3;HIVEP3;HIVEP3;HIVEP3,HIVEP3;HIVEP3;HIVEP3;HIVEP3,HIVEP3;HIVEP3;HIVEP3;HIVEP3,HIVEP3;HIVEP3;HIVEP3;HIVEP3,HIVEP3;HIVEP3,HIVEP3;HIVEP3	NM_001127714;NM_024503;NM_024503;NM_001127714,NM_001127714;NM_024503;NM_024503;NM_001127714,NM_001127714;NM_024503;NM_024503;NM_001127714,NM_001127714;NM_024503;NM_024503;NM_001127714,NM_001127714;NM_024503,NM_024503;NM_001127714	hyperM.iPSC
1	42158168	42158249	2	cg15542713,cg16145216	TSS1500;TSS1500,TSS1500;TSS1500	S_Shore,S_Shore	HIVEP3;HIVEP3,HIVEP3;HIVEP3	NM_024503;NM_001127714,NM_024503;NM_001127714	hypoM.iPSC
1	42279415	42279566	2	cg00068412,cg03326699	_,_	_,_	_,_	_,_	hyperM.iPSC
1	42383494	42385105	4	cg23240465,cg01594290,cg24998527,cg10197057	_,_	N_Shore,N_Shore,Island,S_Shore	_,_	_,_	hyperM.iPSC
1	42390628	42391750	8	cg24583987,cg11837471,cg14848143,cg10179693,cg15545316,cg14258285,cg15976404,cg19728577	TSS1500,TSS1500,TSS200,TSS200,TSS200,TSS200,1stExon;5'UTR,1stExon	_,_	GUCA2B,GUCA2B,GUCA2B,GUCA2B,GUCA2B,GUCA2B,GUCA2B;GUCA2B,GUCA2B	NM_007102,NM_007102,NM_007102,NM_007102,NM_007102,NM_007102,NM_007102;NM_007102,NM_007102	hyperM.iPSC
1	42392950	42393929	2	cg16309224,cg10443237	Body,3'UTR	_,_	GUCA2B,GUCA2B	NM_007102,NM_007102	hyperM.iPSC
1	42402385	42403261	4	cg06003187,cg09212118,cg17739643,cg18856261	Body,TSS200,TSS200,TSS1500	_,_	GUCA2A,GUCA2A,GUCA2A,GUCA2A	NM_033553,NM_033553,NM_033553,NM_033553	hyperM.iPSC
1	42574348	42574552	2	cg18174678,cg17985311	TSS1500,TSS1500	S_Shore,S_Shore	FOXJ3,FOXJ3	NM_014947,NM_014947	hyperM.iPSC
1	42978563	42978624	2	cg11075745,cg27507254	TSS200;TSS200,TSS200;TSS200	S_Shore,S_Shore	CLDN19;CLDN19,CLDN19;CLDN19	NM_148960;NM_001123395,NM_148960;NM_001123395	hypoM.iPSC
1	42982163	42982193	2	cg00060956,cg24542667	_,_	_,_	_,_	_,_	hyperM.iPSC
1	43054265	43054381	2	cg18142162,cg23839159	Body;TSS1500,Body;TSS1500	N_Shore,N_Shore	CCDC23;ERMAP,CCDC23;ERMAP	NM_199342;NM_001017922,NM_199342;NM_001017922	hyperM.iPSC
1	43124447	43125409	3	cg06372967,cg01934756,cg17105912	_,_	N_Shore,N_Shore,Island	_,_	_,_	hyperM.iPSC
1	43126567	43126723	2	cg16395679,cg05164680	_,_	Island,Island	_,_	_,_	hyperM.iPSC
1	43246047	43246565	2	cg13918150,cg10144473	_,_	S_Shore,S_Shore	_,_	_,_	hypoM.iPSC
1	43306383	43306784	5	cg02584756,cg14207654,cg10511249,cg18153322,cg14780649	_,_	N_Shore,Island,Island,Island,Island	_,_	_,_	hyperM.iPSC
1	43511189	43511246	2	cg10317638,cg12078033	Body,Body	Island,Island	TMEM125,TMEM125	NM_144626,NM_144626	hyperM.iPSC
1	43523950	43524091	5	cg12752420,cg00500789,cg23800435,cg24464789,cg02990330	TSS200;TSS200,TSS200;TSS200,TSS200;TSS200,TSS1500;TSS1500,TSS1500;TSS1500	_,_	C1orf210;C1orf210,C1orf210;C1orf210,C1orf210;C1orf210,C1orf210;C1orf210,C1orf210;C1orf210	NM_001164829;NM_182517,NM_001164829;NM_182517,NM_001164829;NM_182517,NM_001164829;NM_182517,NM_001164829;NM_182517	hypoM.iPSC
1	43538204	43539339	3	cg27547344,cg13470063,cg10965178	TSS1500,TSS1500,1stExon	_,N_Shelf	TIE1,TIE1,TIE1	NM_005424,NM_005424,NM_005424	hyperM.iPSC
1	43541140	43542076	2	cg19027361,cg12517577	Body,Body	N_Shore,N_Shore	TIE1,TIE1	NM_005424,NM_005424	hyperM.iPSC
1	43598332	43598491	2	cg06373377,cg05525368	Body,Body	S_Shore,S_Shore	CDC20,CDC20	NM_001255,NM_001255	hyperM.iPSC
1	43627426	43627642	2	cg07458516,cg26805306	Body;TSS1500;Body,Body;TSS1500;Body	N_Shore,N_Shore	MED8;C1orf84;MED8,MED8;C1orf84;MED8	NM_052877;NM_001012961;NM_201542,NM_052877;NM_001012961;NM_201542	hyperM.iPSC
1	43692536	43692851	8	cg03548730,cg10984490,cg21219903,cg25151532,cg05396731,cg22797134,cg17592120,cg20426709	TSS200,TSS200,TSS200,TSS200,TSS1500,TSS1500,TSS1500,TSS1500	S_Shore,S_Shore,S_Shore,S_Shore,S_Shore,S_Shore,S_Shore,S_Shore	HYI,HYI,HYI,HYI,HYI,HYI,HYI,HYI	NM_031207,NM_031207,NM_031207,NM_031207,NM_031207,NM_031207,NM_031207,NM_031207	hyperM.iPSC
1	43788601	43788636	3	cg03347207,cg22797514,cg11073811	Body;Body,Body;Body,Body;Body	_,_	PTPRF;PTPRF,PTPRF;PTPRF,PTPRF;PTPRF	NM_002840;NM_130440,NM_002840;NM_130440,NM_002840;NM_130440	hypoM.iPSC
1	43804343	43804413	2	cg22875872,cg10881128	Body;Body,Body;Body	Island,Island	PTPRF;PTPRF,PTPRF;PTPRF	NM_002840;NM_130440,NM_002840;NM_130440	hyperM.iPSC
1	43860303	43860387	2	cg20675852,cg13433951	3'UTR;3'UTR,3'UTR;3'UTR	_,_	PTPRF;PTPRF,PTPRF;PTPRF	NM_130440;NM_002840,NM_130440;NM_002840	hyperM.iPSC
1	44170687	44171103	2	cg17918314,cg17414508	TSS1500;TSS1500;TSS1500,TSS1500;TSS1500;TSS1500	N_Shore,N_Shore	ARTN;ARTN;ARTN,ARTN;ARTN;ARTN	NM_057091;NM_001136215;NM_057090,NM_057091;NM_001136215;NM_057090	hyperM.iPSC
1	44173896	44174566	5	cg26074140,cg23212751,cg18083817,cg26114324,cg18115627	TSS1500;5'UTR;1stExon;5'UTR;5'UTR;5'UTR,TSS1500;Body;Body;Body;Body,1stExon;Body;Body;Body;Body,1stExon;Body;Body;Body;Body,Body;Body;Body;Body;Body	N_Shore,N_Shore,Island,Island,Island	ARTN;ARTN;ARTN;ARTN;ARTN;ARTN,ARTN;ARTN;ARTN;ARTN;ARTN,ARTN;ARTN;ARTN;ARTN;ARTN,ARTN;ARTN;ARTN;ARTN;ARTN,ARTN;ARTN;ARTN;ARTN;ARTN	NM_057160;NM_003976;NM_003976;NM_057090;NM_001136215;NM_057091,NM_057160;NM_057091;NM_003976;NM_057090;NM_001136215,NM_057160;NM_057091;NM_003976;NM_057090;NM_001136215,NM_057160;NM_057091;NM_003976;NM_057090;NM_001136215,NM_057091;NM_003976;NM_057160;NM_057090;NM_001136215	hypoM.iPSC
1	44218566	44219187	4	cg17170190,cg11337388,cg02416986,cg09666532	5'UTR;TSS1500,5'UTR;TSS200,1stExon;5'UTR;5'UTR,5'UTR;5'UTR	S_Shore,S_Shore,S_Shore,S_Shore	B4GALT2;B4GALT2,B4GALT2;B4GALT2,B4GALT2;B4GALT2;B4GALT2,B4GALT2;B4GALT2	NM_003780;NM_001005417,NM_003780;NM_001005417,NM_001005417;NM_001005417;NM_003780,NM_001005417;NM_003780	hyperM.iPSC
1	44229326	44229540	2	cg22816909,cg00649515	3'UTR;TSS1500;3'UTR,TSS1500	N_Shore,N_Shore	B4GALT2;CCDC24;B4GALT2,CCDC24	NM_003780;NM_152499;NM_001005417,NM_152499	hyperM.iPSC
1	44270124	44270281	3	cg04833514,cg04093149,cg18183642	TSS1500,TSS1500,TSS1500	S_Shore,S_Shore,S_Shore	SLC6A9,SLC6A9,SLC6A9	NM_001024845,NM_001024845,NM_001024845	hypoM.iPSC
1	44281651	44282162	2	cg04786667,cg16583987	_,_	_,_	_,_	_,_	hyperM.iPSC
1	44286464	44286508	2	cg07569994,cg11717881	_,_	_,_	_,_	_,_	hyperM.iPSC
1	44341262	44341764	2	cg08979573,cg06976222	_,_	N_Shore,Island	_,_	_,_	hyperM.iPSC
1	44458609	44459381	2	cg03726147,cg23599716	Body;Body;Body,3'UTR	_,_	DMAP1;DMAP1;DMAP1,ERI3	NM_019100;NM_001034023;NM_001034024,NM_024066	hyperM.iPSC
1	44476510	44476660	2	cg25363807,cg06638529	Body,Body	_,_	ERI3,ERI3	NM_024066,NM_024066	hypoM.iPSC
1	44499530	44499900	5	cg14210311,cg04486940,cg16681083,cg26233866,cg11424674	Body,Body,Body,Body,Body	_,_	ERI3,ERI3,ERI3,ERI3,ERI3	NM_024066,NM_024066,NM_024066,NM_024066,NM_024066	hypoM.iPSC
1	44592425	44592660	2	cg00717995,cg13451048	Body,Body	N_Shore,N_Shore	ERI3,ERI3	NM_024066,NM_024066	hyperM.iPSC
1	44643275	44643301	2	cg17329287,cg21686694	TSS1500,TSS1500	N_Shore,N_Shore	RNF220,RNF220	NM_018150,NM_018150	hypoM.iPSC
1	44878991	44879082	2	cg24317827,cg07018026	Body,Body	_,_	RNF220,RNF220	NM_018150,NM_018150	hyperM.iPSC
1	45016105	45016547	2	cg03533141,cg13553147	Body;Body;TSS1500,TSS200;Body	S_Shore,S_Shelf	SNORD38A;RPS8;SNORD38B,SNORD38B;RPS8	NR_001456;NM_001012;NR_001457,NR_001457;NM_001012	hyperM.iPSC
1	45039369	45039932	2	cg17233819,cg27583604	Body,Body	Island,S_Shore	PLK3,PLK3	NM_004073,NM_004073	hyperM.iPSC
1	45044842	45047187	10	cg10914749,cg16814416,cg07937270,cg21871151,cg24254387,cg08462306,cg03434029,cg11448683,cg14565781,cg00043599	Body,Body,5'UTR;1stExon,5'UTR;1stExon,TSS1500;TSS1500,TSS1500;TSS1500,TSS1500;TSS200,TSS1500;TSS200,1stExon,Body	Island,Island,S_Shore,S_Shore,S_Shore,S_Shore,S_Shore,S_Shore,S_Shelf,S_Shelf	TCTEX1D4,TCTEX1D4,TCTEX1D4;TCTEX1D4,TCTEX1D4;TCTEX1D4,BTBD19;TCTEX1D4,BTBD19;TCTEX1D4,TCTEX1D4;BTBD19,TCTEX1D4;BTBD19,BTBD19,BTBD19	NM_001013632,NM_001013632,NM_001013632;NM_001013632,NM_001013632;NM_001013632,NM_001136537;NM_001013632,NM_001136537;NM_001013632,NM_001013632;NM_001136537,NM_001013632;NM_001136537,NM_001136537,NM_001136537	hyperM.iPSC
1	45048925	45049124	2	cg16651877,cg17093466	Body,Body	N_Shelf,N_Shelf	BTBD19,BTBD19	NM_001136537,NM_001136537	hyperM.iPSC
1	45051558	45051936	4	cg06766016,cg19530728,cg12275060,cg03912703	Body,Body,Body,Body	Island,Island,Island,Island	BTBD19,BTBD19,BTBD19,BTBD19	NM_001136537,NM_001136537,NM_001136537,NM_001136537	hypoM.iPSC
1	45081966	45082012	2	cg27433934,cg07905537	TSS1500;TSS1500,TSS1500;TSS1500	S_Shore,S_Shore	PTCH2;PTCH2,PTCH2;PTCH2	NM_001166292;NM_003738,NM_001166292;NM_003738	hyperM.iPSC
1	45225096	45225192	2	cg12044615,cg16604218	TSS200;TSS200,TSS1500;TSS1500	S_Shore,S_Shore	EIF2B3;EIF2B3,EIF2B3;EIF2B3	NM_001166588;NM_020365,NM_020365;NM_001166588	hyperM.iPSC
1	45539932	45540802	2	cg02387368,cg12085812	_,TSS1500	N_Shore,N_Shore	_,LOC400752	_,NR_024270	hyperM.iPSC
1	45579088	45579473	2	cg09360654,cg17412005	TSS1500;TSS1500;TSS1500;Body;TSS1500;TSS1500;TSS1500,TSS1500;TSS1500;TSS1500;Body;TSS1500;TSS1500;TSS1500	S_Shore,S_Shore	MUTYH;MUTYH;MUTYH;TOE1;MUTYH;MUTYH;MUTYH,MUTYH;MUTYH;MUTYH;TOE1;MUTYH;MUTYH;MUTYH	NM_001048174;NM_012222;NM_001048173;NM_025077;NM_001048171;NM_001048172;NM_001128425,NM_001048174;NM_012222;NM_001048173;NM_025077;NM_001048171;NM_001048172;NM_001128425	hyperM.iPSC
1	45760451	45760485	2	cg02631906,cg11833889	TSS1500;TSS1500;TSS1500,TSS1500;TSS1500;TSS1500	S_Shore,S_Shore	PRDX1;PRDX1;PRDX1,PRDX1;PRDX1;PRDX1	NM_181696;NM_002574;NM_181697,NM_181696;NM_002574;NM_181697	hyperM.iPSC
1	45860923	45861632	3	cg11750580,cg14220678,cg02987388	Body,Body,Body	Island,Island,Island	CCDC17,CCDC17,CCDC17	NM_001114938,NM_001114938,NM_001114938	hyperM.iPSC
1	45917341	45917654	2	cg27171835,cg18889144	5'UTR,5'UTR	_,_	GPBP1L1,GPBP1L1	NM_021639,NM_021639	hyperM.iPSC
1	45988363	45989258	2	cg17156633,cg27171890	5'UTR;5'UTR,TSS200;TSS200	N_Shore,S_Shore	IPP;IPP,IPP;IPP	NM_005897;NM_001145349,NM_001145349;NM_005897	hyperM.iPSC
1	46405052	46405740	3	cg15711727,cg14796305,cg06974930	_,_	N_Shore,N_Shore,S_Shore	_,_	_,_	hyperM.iPSC
1	46421719	46422557	2	cg25369262,cg05371506	Body,Body	_,_	TSPAN1,TSPAN1	NM_005727,NM_005727	hyperM.iPSC
1	46436083	46437185	3	cg15157453,cg22112435,cg04036898	5'UTR;Body,Body;TSS1500,Body;TSS1500	_,_	POMGNT1;POMGNT1,POMGNT1;POMGNT1,POMGNT1;POMGNT1	NM_017739;NR_024332,NR_024332;NM_017739,NR_024332;NM_017739	hyperM.iPSC
1	46539018	46539544	2	cg22228439,cg22509164	Body,Body	N_Shore,N_Shore	LRRC41,LRRC41	NM_006369,NM_006369	hyperM.iPSC
1	46578612	46578742	3	cg08259313,cg10215817,cg02459555	TSS1500,TSS1500,TSS1500	N_Shore,N_Shore,N_Shore	NSUN4,NSUN4,NSUN4	NM_199044,NM_199044,NM_199044	hyperM.iPSC
1	46631335	46632378	5	cg15198148,cg06911238,cg19921581,cg12671744,cg16267850	TSS1500,TSS1500,TSS1500,TSS200,TSS200	N_Shore,N_Shore,N_Shore,Island,Island	FAAH,FAAH,FAAH,FAAH,FAAH	NM_001441,NM_001441,NM_001441,NM_001441,NM_001441	hyperM.iPSC
1	46643674	46643784	2	cg19496155,cg24712482	Body,Body	_,_	FAAH,FAAH	NM_001441,NM_001441	hyperM.iPSC
1	46686119	46687259	3	cg19922871,cg25757115,cg01057635	_,_	N_Shore,Island,S_Shore	_,_	_,_	hypoM.iPSC
1	46712453	46713103	4	cg25019343,cg21692450,cg02042310,cg00346985	_,_	N_Shore,Island,Island,S_Shore	_,_	_,_	hyperM.iPSC
1	46730636	46731936	5	cg00833614,cg27564123,cg18164611,cg14914422,cg19899395	_,_	S_Shore,S_Shore,S_Shore,S_Shore,S_Shelf	_,_	_,_	hypoM.iPSC
1	46744770	46745323	2	cg09914444,cg08032971	TSS1500;TSS1500,1stExon;1stExon	_,_	DMBX1;DMBX1,DMBX1;DMBX1	NM_172225;NM_147192,NM_172225;NM_147192	hyperM.iPSC
1	46769133	46769830	2	cg23038338,cg13643287	_,_	N_Shelf,N_Shore	_,_	_,_	hyperM.iPSC
1	46789975	46790659	2	cg04831174,cg26191882	TSS1500,TSS1500	_,_	KNCN,KNCN	NM_001097611,NM_001097611	hyperM.iPSC
1	46855354	46855456	3	cg05965334,cg00950809,cg05376185	TSS1500,TSS1500,TSS1500	S_Shore,S_Shore,S_Shore	MOBKL2C,MOBKL2C,MOBKL2C	NM_201403,NM_201403,NM_201403	hyperM.iPSC
1	46908603	46909511	2	cg27392551,cg00584815	TSS1500,TSS1500	S_Shore,S_Shelf	C1orf223,C1orf223	NM_001145474,NM_001145474	hyperM.iPSC
1	47428186	47429010	5	cg01074797,cg07810156,cg09258479,cg06619077,cg26523175	1stExon,5'UTR;1stExon,TSS200,TSS1500,TSS1500	_,_	PDZK1IP1,PDZK1IP1;PDZK1IP1,PDZK1IP1,PDZK1IP1,PDZK1IP1	NM_005764,NM_005764;NM_005764,NM_005764,NM_005764,NM_005764	hyperM.iPSC
1	47467104	47471080	8	cg11399254,cg10026317,cg06955484,cg19797376,cg06209689,cg01147107,cg19247124,cg26881761	5'UTR,5'UTR;1stExon,5'UTR;1stExon,TSS200,TSS1500,TSS1500,_	N_Shore,N_Shore,N_Shore,N_Shore,N_Shore,Island,Island,S_Shore	TAL1,TAL1;TAL1,TAL1;TAL1,TAL1,TAL1,TAL1,_	NM_003189,NM_003189;NM_003189,NM_003189;NM_003189,NM_003189,NM_003189,NM_003189,_	hypoM.iPSC
1	47652427	47653027	2	cg07707479,cg20320283	_,TSS1500	N_Shelf,N_Shore	_,FOXE3	_,NM_012186	hyperM.iPSC
1	47655523	47655821	2	cg23115387,cg27175287	1stExon,3'UTR;1stExon	Island,S_Shore	FOXE3,FOXE3;FOXE3	NM_012186,NM_012186;NM_012186	hypoM.iPSC
1	47671022	47674672	9	cg08892370,cg05658236,cg18595867,cg13851904,cg09277376,cg25880954,cg26518431,cg24114899,cg16342298	Body,Body,Body,Body,Body,TSS1500;TSS1500,TSS1500;TSS200,TSS1500;1stExon;5'UTR,1stExon;5'UTR	N_Shore,N_Shore,Island,Island,Island,S_Shore,N_Shore,N_Shore,N_Shore	MGC12982,MGC12982,MGC12982,MGC12982,MGC12982,MGC12982;FOXD2,MGC12982;FOXD2,MGC12982;FOXD2;FOXD2,FOXD2;FOXD2	NR_026878,NR_026878,NR_026878,NR_026878,NR_026878,NR_026878;NM_004474,NR_026878;NM_004474,NR_026878;NM_004474;NM_004474,NM_004474;NM_004474	hypoM.iPSC
1	47677654	47679641	5	cg16076997,cg15691862,cg14513071,cg02294302,cg11393040	1stExon,3'UTR;1stExon,3'UTR;1stExon,3'UTR;1stExon,_	Island,Island,Island,S_Shore,S_Shore	FOXD2,FOXD2;FOXD2,FOXD2;FOXD2,FOXD2;FOXD2,_	NM_004474,NM_004474;NM_004474,NM_004474;NM_004474,NM_004474;NM_004474,_	hypoM.iPSC
1	47681821	47684666	8	cg16013720,cg21475270,cg24525176,cg13167730,cg00203284,cg06531379,cg26864230,cg08260398	_,_	N_Shore,N_Shore,Island,Island,Island,S_Shore,S_Shore,S_Shore	_,_	_,_	hypoM.iPSC
1	47687595	47688538	4	cg17428085,cg03119043,cg18017482,cg07870914	_,_	N_Shore,N_Shore,N_Shore,Island	_,_	_,_	hypoM.iPSC
1	47949342	47949848	3	cg06320401,cg11082779,cg00022054	_,_	S_Shore,S_Shore,S_Shore	_,_	_,_	hyperM.iPSC
1	47963713	47964467	3	cg08275015,cg22345063,cg16125989	_,_	S_Shore,S_Shore,S_Shore	_,_	_,_	hyperM.iPSC
1	48222482	48222805	3	cg05138148,cg08456859,cg04871498	_,_	Island,Island,S_Shore	_,_	_,_	hypoM.iPSC
1	48225052	48225327	3	cg18376692,cg24090990,cg07202054	_,_	S_Shelf,S_Shelf,S_Shelf	_,_	_,_	hyperM.iPSC
1	48347972	48348489	2	cg00996053,cg00983803	Body,Body	_,_	SKINTL,SKINTL	NR_026749,NR_026749	hyperM.iPSC
1	48421026	48421179	2	cg22848704,cg17758905	TSS1500,TSS1500	_,_	SKINTL,SKINTL	NR_026749,NR_026749	hyperM.iPSC
1	48461040	48461112	2	cg21297772,cg10025838	1stExon;1stExon,1stExon;1stExon	_,_	SLC5A9;SLC5A9,SLC5A9;SLC5A9	NM_001011547;NM_001135181,NM_001011547;NM_001135181	hyperM.iPSC
1	48476542	48477418	2	cg05042706,cg25469314	Body;Body,Body;Body	_,_	SLC5A9;SLC5A9,SLC5A9;SLC5A9	NM_001011547;NM_001135181,NM_001011547;NM_001135181	hyperM.iPSC
1	48997412	48997442	2	cg09554876,cg09850418	Body;Body,Body;Body	_,_	BEND5;AGBL4,BEND5;AGBL4	NM_024603;NM_032785,NM_024603;NM_032785	hyperM.iPSC
1	50285753	50286038	2	cg06124579,cg22932804	TSS1500,TSS1500	N_Shore,N_Shore	ELAVL4,ELAVL4	NM_001144777,NM_001144777	hyperM.iPSC
1	50341434	50342197	2	cg13909533,cg26301690	TSS1500;Body,Body;5'UTR;1stExon	_,_	ELAVL4;ELAVL4,ELAVL4;ELAVL4;ELAVL4	NM_001144776;NM_001144777,NM_001144777;NM_001144776;NM_001144776	hyperM.iPSC
1	50344403	50344530	3	cg11404544,cg26888153,cg15322801	Body;Body;TSS200,Body;Body;TSS200,Body;Body;TSS200	_,_	ELAVL4;ELAVL4;ELAVL4,ELAVL4;ELAVL4;ELAVL4,ELAVL4;ELAVL4;ELAVL4	NM_001144777;NM_001144776;NM_001144775,NM_001144777;NM_001144776;NM_001144775,NM_001144777;NM_001144776;NM_001144775	hyperM.iPSC
1	50346557	50347178	5	cg24518017,cg13844820,cg08538032,cg26227005,cg08106706	Body;TSS1500;Body;Body;TSS1500,Body;TSS1500;Body;Body;TSS1500,Body;Body;TSS200;Body;TSS200,Body;Body;TSS200;Body;TSS200,Body;Body;TSS200;Body;TSS200	_,_	ELAVL4;ELAVL4;ELAVL4;ELAVL4;ELAVL4,ELAVL4;ELAVL4;ELAVL4;ELAVL4;ELAVL4,ELAVL4;ELAVL4;ELAVL4;ELAVL4;ELAVL4,ELAVL4;ELAVL4;ELAVL4;ELAVL4;ELAVL4,ELAVL4;ELAVL4;ELAVL4;ELAVL4;ELAVL4	NM_001144777;NM_021952;NM_001144776;NM_001144775;NM_001144774,NM_001144777;NM_021952;NM_001144776;NM_001144775;NM_001144774,NM_001144777;NM_001144776;NM_021952;NM_001144775;NM_001144774,NM_001144777;NM_001144776;NM_021952;NM_001144775;NM_001144774,NM_001144777;NM_001144776;NM_021952;NM_001144775;NM_001144774	hyperM.iPSC
1	50652147	50652737	3	cg07584563,cg08194553,cg26682922	_,_	N_Shore,N_Shore,N_Shore	_,_	_,_	hyperM.iPSC
1	50657939	50658658	2	cg03989480,cg13909582	Body,Body	Island,Island	DMRTA2,DMRTA2	NM_032110,NM_032110	hypoM.iPSC
1	50660065	50661178	5	cg00184452,cg06159394,cg06724305,cg09846084,cg17800654	5'UTR,5'UTR,5'UTR,5'UTR,5'UTR	Island,Island,Island,Island,Island	DMRTA2,DMRTA2,DMRTA2,DMRTA2,DMRTA2	NM_032110,NM_032110,NM_032110,NM_032110,NM_032110	hypoM.iPSC
1	50663540	50664338	3	cg17744293,cg16598600,cg23638252	_,_	Island,Island,N_Shore	_,_	_,_	hypoM.iPSC
1	50665814	50666418	3	cg22627293,cg11665991,cg25281186	_,_	Island,Island,S_Shore	_,_	_,_	hypoM.iPSC
1	51214721	51215260	3	cg23090529,cg21140898,cg00968536	_,_	N_Shore,N_Shore,N_Shore	_,_	_,_	hypoM.iPSC
1	51561221	51561358	2	cg18755643,cg06197074	TSS1500;Body,TSS1500;Body	_,_	TTC39A;TTC39A,TTC39A;TTC39A	NM_001080494;NM_001144832,NM_001080494;NM_001144832	hyperM.iPSC
1	51583424	51584599	6	cg00770085,cg10653240,cg12688609,cg26913502,cg04079538,cg20942910	TSS200,TSS200,TSS1500,TSS1500,TSS1500,TSS1500	S_Shore,S_Shore,S_Shore,S_Shore,S_Shore,S_Shore	TTC39A,TTC39A,TTC39A,TTC39A,TTC39A,TTC39A	NM_001144832,NM_001144832,NM_001144832,NM_001144832,NM_001144832,NM_001144832	hyperM.iPSC
1	51660201	51661162	3	cg21366602,cg02670343,cg10027723	1stExon;Body,TSS1500;Body,TSS1500;Body	_,_	EPS15;EPS15,EPS15;EPS15,EPS15;EPS15	NM_001159969;NM_001981,NM_001159969;NM_001981,NM_001159969;NM_001981	hyperM.iPSC
1	51757847	51758842	2	cg01447748,cg01970336	TSS1500,TSS1500	S_Shore,S_Shore	EPS15,EPS15	NM_001981,NM_001981	hyperM.iPSC
1	52074464	52075391	2	cg01523285,cg21108691	Body;Body,TSS1500;Body;Body	_,_	NRD1;NRD1,MIR761;NRD1;NRD1	NM_002525;NM_001101662,NR_031580;NM_002525;NM_001101662	hyperM.iPSC
1	52840225	52841167	3	cg18087326,cg12640469,cg23272399	TSS1500,TSS1500,Body	N_Shore,N_Shore,Island	GPX7,GPX7,GPX7	NM_015696,NM_015696,NM_015696	hyperM.iPSC
1	52870887	52871229	3	cg04882349,cg22434763,cg09068158	TSS1500,TSS1500,TSS1500	N_Shore,Island,Island	FAM159A,FAM159A,FAM159A	NM_001042693,NM_001042693,NM_001042693	hypoM.iPSC
1	53078831	53079123	2	cg11957884,cg01066056	_,_	N_Shelf,N_Shore	_,_	_,_	hyperM.iPSC
1	53159791	53160164	3	cg09128567,cg17185953,cg13461509	Body,TSS200,TSS200	Island,Island,S_Shore	ECHDC2,ECHDC2,ECHDC2	NM_018281,NM_018281,NM_018281	hyperM.iPSC
1	53300000	53300012	2	cg25629790,cg04918175	TSS1500,TSS1500	N_Shore,N_Shore	PODN,PODN	NM_153703,NM_153703	hyperM.iPSC
1	53301200	53301579	3	cg23092823,cg16899892,cg01568973	Body,Body,Body	Island,Island,S_Shore	PODN,PODN,PODN	NM_153703,NM_153703,NM_153703	hypoM.iPSC
1	53380625	53380955	2	cg19196684,cg18046365	1stExon,TSS200	_,_	SLC1A7,SLC1A7	NM_006671,NM_006671	hyperM.iPSC
1	53566799	53567348	3	cg04154290,cg17095731,cg26191586	TSS1500;TSS1500;TSS1500;TSS1500,TSS1500;TSS1500;TSS1500;TSS1500,TSS1500;TSS1500;TSS1500;TSS1500	S_Shore,S_Shore,S_Shore	LRP8;LRP8;LRP8;LRP8,LRP8;LRP8;LRP8;LRP8,LRP8;LRP8;LRP8;LRP8	NM_033300;NM_017522;NM_001018054;NM_004631,NM_033300;NM_017522;NM_001018054;NM_004631,NM_033300;NM_017522;NM_001018054;NM_004631	hypoM.iPSC
1	53696752	53696977	2	cg23213876,cg10818160	TSS1500,TSS1500	N_Shore,N_Shore	DMRTB1,DMRTB1	NM_033067,NM_033067	hyperM.iPSC
1	53967507	53968418	2	cg20148127,cg27311970	5'UTR,5'UTR	_,_	GLIS1,GLIS1	NM_147193,NM_147193	hyperM.iPSC
1	53972284	53974113	7	cg06941093,cg27397757,cg21142398,cg05040219,cg18767735,cg00454274,cg01427362	5'UTR;1stExon,5'UTR;1stExon,TSS1500,TSS1500,TSS1500,TSS1500,_	N_Shelf,N_Shelf,N_Shelf,N_Shelf,N_Shelf,N_Shelf,N_Shore	GLIS1;GLIS1,GLIS1;GLIS1,GLIS1,GLIS1,GLIS1,GLIS1,_	NM_147193;NM_147193,NM_147193;NM_147193,NM_147193,NM_147193,NM_147193,NM_147193,_	hyperM.iPSC
1	53976136	53976266	2	cg05927190,cg17786642	_,_	Island,Island	_,_	_,_	hypoM.iPSC
1	54077703	54077719	2	cg07006920,cg05152751	TSS1500;TSS1500;TSS1500,TSS1500;TSS1500;TSS1500	S_Shore,S_Shore	TMEM48;TMEM48;TMEM48,TMEM48;TMEM48;TMEM48	NM_018087;NM_001168551;NR_033142,NM_018087;NM_001168551;NR_033142	hyperM.iPSC
1	54131034	54132703	4	cg12708287,cg03886898,cg20932440,cg19526600	TSS1500;TSS1500;TSS1500;TSS1500,TSS1500;TSS1500;TSS1500;TSS1500,TSS200;TSS200;TSS200;TSS200,1stExon;1stExon;Body;1stExon	S_Shelf,S_Shelf,_	DIO1;DIO1;DIO1;DIO1,DIO1;DIO1;DIO1;DIO1,DIO1;DIO1;DIO1;DIO1,DIO1;DIO1;DIO1;DIO1	NM_213593;NM_000792;NM_001039716;NM_001039715,NM_213593;NM_000792;NM_001039716;NM_001039715,NM_213593;NM_001039715;NM_000792;NM_001039716,NM_001039715;NM_000792;NM_213593;NM_001039716	hyperM.iPSC
1	54292702	54293020	2	cg08526412,cg01182697	Body;TSS1500,Body;TSS1500	S_Shore,S_Shore	C1orf83;TMEM59,C1orf83;TMEM59	NM_153035;NM_004872,NM_153035;NM_004872	hyperM.iPSC
1	54392033	54392291	3	cg26185508,cg17035984,cg20777437	TSS200,TSS1500,TSS1500	_,_	CDCP2,CDCP2,CDCP2	NM_201546,NM_201546,NM_201546	hyperM.iPSC
1	54614793	54614992	2	cg10761558,cg09417011	Body;Body;Body,Body;Body;Body	_,_	SSBP3;SSBP3;SSBP3,SSBP3;SSBP3;SSBP3	NM_001009955;NM_018070;NM_145716,NM_001009955;NM_018070;NM_145716	hypoM.iPSC
1	54628765	54629099	3	cg10165689,cg15829056,cg21655710	Body;Body;Body,Body;Body;Body,Body;Body;Body	N_Shore,Island,Island	SSBP3;SSBP3;SSBP3,SSBP3;SSBP3;SSBP3,SSBP3;SSBP3;SSBP3	NM_001009955;NM_018070;NM_145716,NM_001009955;NM_018070;NM_145716,NM_001009955;NM_018070;NM_145716	hyperM.iPSC
1	54713720	54713758	2	cg24834436,cg08106066	_,_	S_Shore,S_Shore	_,_	_,_	hypoM.iPSC
1	54786105	54786544	3	cg02905900,cg10266490,cg21448423	TSS1500;TSS1500,TSS200;TSS200,1stExon;5'UTR;1stExon;5'UTR	_,_	ACOT11;ACOT11,ACOT11;ACOT11,ACOT11;ACOT11;ACOT11;ACOT11	NM_147161;NM_015547,NM_147161;NM_015547,NM_015547;NM_015547;NM_147161;NM_147161	hyperM.iPSC
1	54879879	54880506	3	cg03983498,cg06007645,cg24051818	TSS200;TSS200,TSS200;TSS200,Body;5'UTR	_,_	C1orf175;C1orf175,C1orf175;C1orf175,C1orf175;C1orf175	NM_001039464;NR_026782,NM_001039464;NR_026782,NR_026782;NM_001039464	hyperM.iPSC
1	54923639	54924096	2	cg10097045,cg19806310	Body;Body,Body;Body	_,_	C1orf175;C1orf175,C1orf175;C1orf175	NM_001039464;NR_026782,NM_001039464;NR_026782	hyperM.iPSC
1	55003295	55003358	2	cg08168431,cg11084629	TSS1500,TSS1500	S_Shore,S_Shore	PARS2,PARS2	NM_152268,NM_152268	hyperM.iPSC
1	55019455	55019996	5	cg15089077,cg24550149,cg19022697,cg15645660,cg11949335	3'UTR,Body,Body,Body,Body	Island,Island,Island,Island,Island	TTC22,TTC22,TTC22,TTC22,TTC22	NM_001114108,NM_001114108,NM_001114108,NM_001114108,NM_001114108	hyperM.iPSC
1	55038884	55039881	11	cg18972998,cg24697184,cg26413174,cg07976644,cg19808825,cg22130834,cg04871778,cg24685134,cg11247674,cg20569588,cg02935904	1stExon;1stExon,1stExon;1stExon,1stExon;1stExon,1stExon;5'UTR;1stExon;5'UTR,TSS200;TSS200,TSS200;TSS200,TSS200;TSS200,TSS1500;TSS1500,TSS1500;TSS1500,TSS1500;TSS1500,TSS1500;TSS1500	Island,Island,Island,Island,Island,Island,S_Shore,S_Shore,S_Shore,S_Shore,S_Shore	TTC22;TTC22,TTC22;TTC22,TTC22;TTC22,TTC22;TTC22;TTC22;TTC22,TTC22;TTC22,TTC22;TTC22,TTC22;TTC22,TTC22;TTC22,TTC22;TTC22,TTC22;TTC22,TTC22;TTC22	NM_001114108;NM_017904,NM_001114108;NM_017904,NM_001114108;NM_017904,NM_001114108;NM_001114108;NM_017904;NM_017904,NM_001114108;NM_017904,NM_001114108;NM_017904,NM_001114108;NM_017904,NM_017904;NM_001114108,NM_017904;NM_001114108,NM_017904;NM_001114108,NM_017904;NM_001114108	hyperM.iPSC
1	55044261	55044265	2	cg21872908,cg20903926	TSS200;TSS200,TSS200;TSS200	Island,Island	C1orf177;C1orf177,C1orf177;C1orf177	NM_152607;NM_001110533,NM_152607;NM_001110533	hyperM.iPSC
1	55046225	55046773	2	cg22354132,cg15391151	Body;Body,Body;Body	S_Shore,S_Shelf	C1orf177;C1orf177,C1orf177;C1orf177	NM_152607;NM_001110533,NM_152607;NM_001110533	hyperM.iPSC
1	55089357	55089776	2	cg17475467,cg16051114	3'UTR,3'UTR	_,_	DHCR24,DHCR24	NM_014762,NM_014762	hyperM.iPSC
1	55123411	55124247	2	cg20291423,cg27168858	Body,Body	N_Shore,N_Shore	DHCR24,DHCR24	NM_014762,NM_014762	hypoM.iPSC
1	55125915	55126294	2	cg25536676,cg17901584	TSS1500,TSS1500	Island,S_Shore	DHCR24,DHCR24	NM_014762,NM_014762	hyperM.iPSC
1	55189343	55189378	2	cg15129052,cg22081003	_,_	_,_	_,_	_,_	hyperM.iPSC
1	55218422	55219165	4	cg19638175,cg07192718,cg11987231,cg01189112	TSS1500,TSS1500,TSS1500,1stExon;5'UTR	N_Shore,N_Shore,N_Shore,Island	TMEM61,TMEM61,TMEM61,TMEM61;TMEM61	NM_182532,NM_182532,NM_182532,NM_182532;NM_182532	hyperM.iPSC
1	55236633	55237870	6	cg00815091,cg14615807,cg05399330,cg27058889,cg00812246,cg22162435	TSS1500,TSS1500,TSS200,1stExon;5'UTR,1stExon,Body	S_Shore,S_Shore,S_Shore,S_Shore,S_Shore,S_Shelf	BSND,BSND,BSND,BSND;BSND,BSND,BSND	NM_057176,NM_057176,NM_057176,NM_057176;NM_057176,NM_057176,NM_057176	hyperM.iPSC
1	55277559	55277649	2	cg14993491,cg06197377	TSS1500,TSS200	N_Shore,Island	PCSK9,PCSK9	NM_174936,NM_174936	hypoM.iPSC
1	55301695	55301746	2	cg24072166,cg00922420	Body,Body	_,_	PCSK9,PCSK9	NM_174936,NM_174936	hyperM.iPSC
1	55957281	55957684	2	cg02670637,cg03108296	_,_	_,_	_,_	_,_	hyperM.iPSC
1	57066436	57066673	2	cg17011134,cg10092779	_,_	_,_	_,_	_,_	hyperM.iPSC
1	57861589	57861945	2	cg00026909,cg20292791	5'UTR,5'UTR	_,_	DAB1,DAB1	NM_021080,NM_021080	hyperM.iPSC
1	58486529	58487040	2	cg08164484,cg01451162	5'UTR,5'UTR	N_Shore,N_Shore	DAB1,DAB1	NM_021080,NM_021080	hyperM.iPSC
1	58671260	58671381	2	cg03513464,cg10708189	_,_	_,_	_,_	_,_	hyperM.iPSC
1	58816164	58816908	3	cg05346878,cg27398499,cg11243634	TSS1500,TSS1500,TSS1500	S_Shore,S_Shore,S_Shore	TACSTD2,TACSTD2,TACSTD2	NM_002353,NM_002353,NM_002353	hyperM.iPSC
1	59007517	59007604	2	cg06036239,cg19306368	_,_	_,_	_,_	_,_	hyperM.iPSC
1	59052878	59053655	5	cg17826530,cg08731696,cg02951357,cg16037711,cg03611060	_,_	Island,Island,N_Shore,N_Shore,Island	_,_	_,_	hypoM.iPSC
1	60052694	60053665	2	cg16378352,cg21577889	TSS1500,Body	N_Shore,S_Shore	HOOK1,HOOK1	NM_015888,NM_015888	hypoM.iPSC
1	60311723	60312263	4	cg18870231,cg24740868,cg00914726,cg17238766	5'UTR,1stExon;5'UTR,1stExon;5'UTR,TSS1500	N_Shore,Island,Island,S_Shore	C1orf87,C1orf87;C1orf87,C1orf87;C1orf87,C1orf87	NM_152377,NM_152377;NM_152377,NM_152377;NM_152377,NM_152377	hypoM.iPSC
1	61290395	61290464	2	cg09113483,cg22877452	_,_	N_Shore,N_Shore	_,_	_,_	hypoM.iPSC
1	61291485	61292987	8	cg02140384,cg10773698,cg24430419,cg17042098,cg13883696,cg09550810,cg26013992,cg11254532	_,_	N_Shore,Island,Island,Island,Island,Island,S_Shore,S_Shore	_,_	_,_	hypoM.iPSC
1	61395954	61396909	2	cg12126901,cg19899972	Body;Body;Body;Body,Body;Body;Body;Body	_,_	NFIA;NFIA;NFIA;NFIA,NFIA;NFIA;NFIA;NFIA	NM_001145512;NM_001145511;NM_001134673;NM_005595,NM_001145512;NM_001145511;NM_001134673;NM_005595	hyperM.iPSC
1	61422495	61422561	2	cg09062708,cg15575375	Body;Body;Body;Body,Body;Body;Body;Body	_,_	NFIA;NFIA;NFIA;NFIA,NFIA;NFIA;NFIA;NFIA	NM_001145512;NM_001145511;NM_001134673;NM_005595,NM_001145512;NM_001145511;NM_001134673;NM_005595	hyperM.iPSC
1	61880018	61880065	2	cg08035234,cg19022814	_,_	_,_	_,_	_,_	hyperM.iPSC
1	62432776	62432869	3	cg06190807,cg14850026,cg27300647	TSS1500;TSS1500,TSS1500;TSS1500,TSS200;TSS200	N_Shore,N_Shore,N_Shore	L1TD1;L1TD1,L1TD1;L1TD1,L1TD1;L1TD1	NM_019079;NM_001164835,NM_019079;NM_001164835,NM_001164835;NM_019079	hypoM.iPSC
1	63312793	63312805	2	cg12806613,cg15672853	_,_	_,_	_,_	_,_	hyperM.iPSC
1	63558859	63558894	2	cg18175808,cg23592947	_,_	Island,Island	_,_	_,_	hypoM.iPSC
1	63564798	63565451	3	cg25144893,cg06925855,cg01067151	_,_	S_Shore,S_Shore,N_Shelf	_,_	_,_	hypoM.iPSC
1	63567867	63568436	3	cg11953254,cg20321153,cg21244177	_,_	N_Shore,Island,Island	_,_	_,_	hypoM.iPSC
1	64744340	64744349	2	cg20876010,cg23617193	Body,Body	S_Shore,S_Shore	CACHD1,CACHD1	NM_020925,NM_020925	hypoM.iPSC
1	65205330	65205948	2	cg13420662,cg07453451	TSS1500,TSS1500	S_Shore,S_Shore	JAK1,JAK1	NM_002227,NM_002227	hyperM.iPSC
1	65502927	65504474	9	cg04993276,cg08856601,cg26304237,cg04567445,cg09235539,cg09082287,cg24550010,cg04994405,cg20299703	TSS200,TSS200,TSS200,TSS200,5'UTR;1stExon,5'UTR;1stExon,Body,Body,Body	N_Shore,N_Shore,N_Shore,N_Shore,N_Shore,N_Shore,N_Shore,Island,S_Shore	DNAJC6,DNAJC6,DNAJC6,DNAJC6,DNAJC6;DNAJC6,DNAJC6;DNAJC6,DNAJC6,DNAJC6,DNAJC6	NM_014787,NM_014787,NM_014787,NM_014787,NM_014787;NM_014787,NM_014787;NM_014787,NM_014787,NM_014787,NM_014787	hypoM.iPSC
1	65765737	65766679	2	cg16265717,cg07959978	5'UTR;5'UTR;5'UTR,5'UTR;5'UTR;5'UTR	S_Shore,S_Shelf	LEPR;LEPR;LEPR,LEPR;LEPR;LEPR	NM_001003680;NM_001003679;NM_002303,NM_001003680;NM_001003679;NM_002303	hyperM.iPSC
1	66229734	66231391	5	cg20612286,cg08462879,cg03435439,cg16399300,cg26912671	Body;TSS1500;Body,Body;TSS1500;Body,TSS200;Body;Body,Body;1stExon;Body,Body;1stExon;Body	_,_	PDE4B;PDE4B;PDE4B,PDE4B;PDE4B;PDE4B,PDE4B;PDE4B;PDE4B,PDE4B;PDE4B;PDE4B,PDE4B;PDE4B;PDE4B	NM_001037341;NM_001037340;NM_002600,NM_001037341;NM_001037340;NM_002600,NM_001037340;NM_001037341;NM_002600,NM_001037341;NM_001037340;NM_002600,NM_001037341;NM_001037340;NM_002600	hyperM.iPSC
1	66570069	66570289	3	cg13866577,cg06115810,cg03442467	Body;TSS1500;Body;Body,Body;TSS200;Body;Body,Body;TSS200;Body;Body	_,_	PDE4B;PDE4B;PDE4B;PDE4B,PDE4B;PDE4B;PDE4B;PDE4B,PDE4B;PDE4B;PDE4B;PDE4B	NM_001037341;NM_001037339;NM_001037340;NM_002600,NM_001037341;NM_001037339;NM_001037340;NM_002600,NM_001037341;NM_001037339;NM_001037340;NM_002600	hyperM.iPSC
1	66990261	66990441	4	cg17819635,cg09769134,cg08857729,cg24110050	TSS1500,TSS1500,TSS1500,TSS1500	N_Shore,N_Shore,N_Shore,N_Shore	TCTEX1D1,TCTEX1D1,TCTEX1D1,TCTEX1D1	NM_152665,NM_152665,NM_152665,NM_152665	hypoM.iPSC
1	67039389	67039717	3	cg04979933,cg09672765,cg02120470	1stExon,1stExon,TSS200	_,_	INSL5,INSL5,INSL5	NM_005478,NM_005478,NM_005478	hyperM.iPSC
1	67366862	67367376	2	cg24863734,cg05707463	TSS200,TSS1500	_,_	C1orf141,C1orf141	NM_001013674,NM_001013674	hyperM.iPSC
1	67372817	67373423	5	cg23726106,cg01320130,cg08029281,cg17833169,cg03340356	_,_	N_Shore,N_Shore,Island,Island,S_Shore	_,_	_,_	hyperM.iPSC
1	67403802	67404616	2	cg22674341,cg07842386	TSS1500,TSS200	_,_	IL23R,IL23R	NM_144701,NM_144701	hyperM.iPSC
1	67545574	67546307	3	cg19745415,cg00318756,cg04311496	TSS200,TSS200,5'UTR	N_Shore,N_Shore,Island	IL12RB2,IL12RB2,IL12RB2	NM_001559,NM_001559,NM_001559	hypoM.iPSC
1	67922781	67922988	3	cg23723105,cg02639608,cg01810953	TSS1500,TSS1500,TSS1500	N_Shore,N_Shore,N_Shore	GADD45A,GADD45A,GADD45A	NM_001924,NM_001924,NM_001924	hyperM.iPSC
1	68004722	68005045	2	cg11855555,cg02274788	5'UTR,5'UTR	_,_	GNG12,GNG12	NM_018841,NM_018841	hyperM.iPSC
1	68072081	68072099	2	cg25189904,cg26764244	TSS1500,TSS1500	S_Shore,S_Shore	GNG12,GNG12	NM_018841,NM_018841	hyperM.iPSC
1	68285127	68285651	2	cg03641225,cg21808053	Body,5'UTR	N_Shore,S_Shore	DIRAS3,DIRAS3	NM_004675,NM_004675	hyperM.iPSC
1	68288668	68289861	6	cg12070746,cg05949203,cg19694923,cg27545611,cg16148134,cg10038185	5'UTR,1stExon;5'UTR,1stExon;5'UTR,TSS1500,TSS1500,TSS1500	N_Shore,Island,Island,N_Shore,N_Shore,Island	DIRAS3,DIRAS3;DIRAS3,DIRAS3;DIRAS3,DIRAS3,DIRAS3,DIRAS3	NM_004675,NM_004675;NM_004675,NM_004675;NM_004675,NM_004675,NM_004675,NM_004675	hyperM.iPSC
1	69808434	69808694	2	cg17177995,cg22076941	_,_	S_Shore,S_Shore	_,_	_,_	hypoM.iPSC
1	70156476	70156600	2	cg16409235,cg04348023	Body;TSS1500,Body;TSS1500	N_Shore,N_Shore	LRRC7;PIN1L,LRRC7;PIN1L	NM_020794;NR_023916,NM_020794;NR_023916	hyperM.iPSC
1	71284688	71285073	2	cg06937997,cg23823908	Body;Body;Body;Body;Body;Body;Body;Body;Body;Body,1stExon;Body;1stExon;Body;1stExon;1stExon;Body;1stExon;1stExon;1stExon	N_Shore,Island	PTGER3;PTGER3;PTGER3;PTGER3;PTGER3;PTGER3;PTGER3;PTGER3;PTGER3;PTGER3,PTGER3;PTGER3;PTGER3;PTGER3;PTGER3;PTGER3;PTGER3;PTGER3;PTGER3;PTGER3	NR_028294;NM_198715;NM_198717;NM_198714;NR_028293;NM_198718;NR_028292;NM_001126044;NM_198719;NM_198716,NM_198718;NR_028294;NM_198714;NR_028293;NM_198716;NM_198717;NR_028292;NM_001126044;NM_198719;NM_198715	hyperM.iPSC
1	74436171	74436748	10	cg16356856,cg13900770,cg06034096,cg00402366,cg21446242,cg04835163,cg27438756,cg06366937,cg19827606,cg03837750	5'UTR;TSS1500;TSS1500,5'UTR;TSS1500;TSS1500,1stExon;5'UTR;TSS1500;TSS1500,1stExon;TSS200;TSS200;5'UTR,1stExon;TSS200;TSS200;5'UTR,TSS200;TSS200;TSS200,TSS200;TSS200;TSS200,TSS200;1stExon;5'UTR;TSS200,TSS1500;Body;Body,TSS1500;Body;Body	N_Shore,N_Shore,N_Shore,N_Shore,Island,Island,Island,Island,S_Shore,S_Shore	LRRIQ3;TNNI3K;FPGT,LRRIQ3;TNNI3K;FPGT,LRRIQ3;LRRIQ3;TNNI3K;FPGT,LRRIQ3;TNNI3K;FPGT;LRRIQ3,LRRIQ3;TNNI3K;FPGT;LRRIQ3,TNNI3K;FPGT;LRRIQ3,TNNI3K;FPGT;LRRIQ3,TNNI3K;FPGT;FPGT;LRRIQ3,LRRIQ3;TNNI3K;FPGT,LRRIQ3;TNNI3K;FPGT	NM_001105659;NM_001112808;NM_003838,NM_001105659;NM_001112808;NM_003838,NM_001105659;NM_001105659;NM_001112808;NM_003838,NM_001105659;NM_001112808;NM_003838;NM_001105659,NM_001105659;NM_001112808;NM_003838;NM_001105659,NM_001112808;NM_003838;NM_001105659,NM_001112808;NM_003838;NM_001105659,NM_001112808;NM_003838;NM_003838;NM_001105659,NM_001105659;NM_001112808;NM_003838,NM_001105659;NM_001112808;…	hyperM.iPSC
1	74912169	74912877	5	cg27268184,cg13341453,cg03513964,cg03035538,cg09365529	TSS200,TSS200,TSS1500,TSS1500,TSS1500	_,_	C1orf173,C1orf173,C1orf173,C1orf173,C1orf173	NM_001002912,NM_001002912,NM_001002912,NM_001002912,NM_001002912	hyperM.iPSC
1	75363071	75363941	5	cg01077724,cg02297043,cg01540595,cg01066472,cg00325531	_,_	N_Shore,Island,Island,Island,Island	_,_	_,_	hyperM.iPSC
1	75365538	75367180	11	cg01005080,cg09766820,cg00419321,cg21009965,cg01971160,cg11196437,cg01185626,cg09222749,cg10249828,cg20594809,cg01259156	TSS1500,TSS1500,TSS1500,TSS1500,TSS1500,TSS1500,TSS200,TSS200,1stExon;5'UTR,5'UTR,5'UTR	S_Shore,S_Shore,N_Shelf,N_Shelf,N_Shelf,N_Shore,N_Shore,N_Shore,N_Shore,N_Shore,N_Shore	LHX8,LHX8,LHX8,LHX8,LHX8,LHX8,LHX8,LHX8,LHX8;LHX8,LHX8,LHX8	NM_001001933,NM_001001933,NM_001001933,NM_001001933,NM_001001933,NM_001001933,NM_001001933,NM_001001933,NM_001001933;NM_001001933,NM_001001933,NM_001001933	hyperM.iPSC
1	75370627	75370658	2	cg12435629,cg11750396	Body,Body	S_Shore,S_Shore	LHX8,LHX8	NM_001001933,NM_001001933	hypoM.iPSC
1	75372120	75373529	7	cg00681106,cg06615678,cg05352087,cg23166389,cg13691003,cg10095577,cg26309264	Body,Body,Body,Body,Body,Body,Body	N_Shore,N_Shore,N_Shore,N_Shore,N_Shore,N_Shore,Island	LHX8,LHX8,LHX8,LHX8,LHX8,LHX8,LHX8	NM_001001933,NM_001001933,NM_001001933,NM_001001933,NM_001001933,NM_001001933,NM_001001933	hypoM.iPSC
1	75850764	75852421	4	cg12659128,cg27336379,cg00361992,cg07381464	TSS1500;TSS1500,TSS1500;TSS1500,_	N_Shelf,N_Shelf,N_Shore,N_Shore	SLC44A5;SLC44A5,SLC44A5;SLC44A5,_	NM_001130058;NM_152697,NM_001130058;NM_152697,_	hyperM.iPSC
1	75961476	75961780	2	cg21537122,cg05258079	TSS1500;TSS1500,TSS1500;TSS1500	N_Shore,N_Shore	ACADM;ACADM,ACADM;ACADM	NM_000016;NM_001127328,NM_000016;NM_001127328	hyperM.iPSC
1	76034890	76035572	8	cg16427752,cg02161115,cg21438018,cg14200364,cg22035229,cg17028301,cg23237611,cg08909961	TSS1500,TSS1500,TSS200,TSS200,1stExon;5'UTR,1stExon,1stExon,Body	N_Shore,N_Shore,Island,Island,Island,Island,Island,S_Shore	MSH4,MSH4,MSH4,MSH4,MSH4;MSH4,MSH4,MSH4,MSH4	NM_002440,NM_002440,NM_002440,NM_002440,NM_002440;NM_002440,NM_002440,NM_002440,NM_002440	hyperM.iPSC
1	77003207	77003425	3	cg17826956,cg14023881,cg25199254	_,_	_,_	_,_	_,_	hyperM.iPSC
1	78283728	78284076	4	cg26263401,cg20785560,cg09662920,cg09107315	TSS1500,TSS1500,TSS200,TSS200	N_Shore,N_Shore,N_Shore,N_Shore	GIPC2,GIPC2,GIPC2,GIPC2	NM_017655,NM_017655,NM_017655,NM_017655	hypoM.iPSC
1	78728856	78729046	2	cg04410756,cg09685982	TSS1500;TSS1500,TSS1500;TSS1500	N_Shore,N_Shore	PTGFR;PTGFR,PTGFR;PTGFR	NM_001039585;NM_000959,NM_001039585;NM_000959	hyperM.iPSC
1	78730103	78730270	2	cg02859837,cg19403909	5'UTR;5'UTR,5'UTR;5'UTR	Island,S_Shore	PTGFR;PTGFR,PTGFR;PTGFR	NM_001039585;NM_000959,NM_001039585;NM_000959	hyperM.iPSC
1	78857750	78858353	4	cg13304609,cg06872964,cg17980508,cg00855901	TSS1500,TSS1500,TSS1500,TSS1500	_,_	IFI44L,IFI44L,IFI44L,IFI44L	NM_006820,NM_006820,NM_006820,NM_006820	hyperM.iPSC
1	80289179	80289598	2	cg24358047,cg24857958	_,_	_,_	_,_	_,_	hyperM.iPSC
1	81664381	81664720	2	cg17971947,cg14014687	_,_	_,_	_,_	_,_	hyperM.iPSC
1	81937683	81937698	2	cg00856273,cg00759301	_,_	_,_	_,_	_,_	hyperM.iPSC
1	84099050	84100014	6	cg14790630,cg08882038,cg07807165,cg02531516,cg24955204,cg19161859	_,_	Island,Island,Island,Island,Island,S_Shore	_,_	_,_	hyperM.iPSC
1	84535926	84536520	2	cg20426713,cg11555919	TSS1500,TSS200	N_Shore,N_Shore	SAMD13,SAMD13	NM_001010971,NM_001010971	hyperM.iPSC
1	84539370	84540466	4	cg17142950,cg19869443,cg23086720,cg03204322	TSS1500;Body,TSS1500;Body,1stExon;TSS1500;5'UTR;Body,TSS1500;5'UTR;Body	S_Shore,S_Shore,S_Shelf,S_Shelf	SAMD13;SAMD13,SAMD13;SAMD13,SAMD13;SAMD13;SAMD13;SAMD13,SAMD13;SAMD13;SAMD13	NM_001134663;NM_001010971,NM_001134663;NM_001010971,NM_001134663;NM_001134664;NM_001134663;NM_001010971,NM_001134664;NM_001134663;NM_001010971	hyperM.iPSC
1	84636677	84637197	2	cg16902156,cg05791506	TSS200;TSS1500,TSS1500;Body	_,_	DNASE2B;UOX,UOX;DNASE2B	NM_021233;NR_003927,NR_003927;NM_021233	hyperM.iPSC
1	84742645	84743599	2	cg24640697,cg23255950	Body,TSS1500;Body	N_Shore,N_Shore	GNG5,SPATA1;GNG5	NM_005274,NM_001081472;NM_005274	hyperM.iPSC
1	84812912	84813445	3	cg12100018,cg26882204,cg14791530	TSS200,TSS1500,TSS1500	Island,S_Shore,S_Shore	CTBS,CTBS,CTBS	NM_004388,NM_004388,NM_004388	hyperM.iPSC
1	85285545	85285779	3	cg02345146,cg12037450,cg00893493	5'UTR,5'UTR,5'UTR	N_Shore,N_Shore,N_Shore	MCOLN3,MCOLN3,MCOLN3	NM_018298,NM_018298,NM_018298	hypoM.iPSC
1	85287142	85288124	4	cg13331559,cg10515956,cg17754945,cg12210618	TSS1500,TSS1500,TSS1500,TSS1500	Island,S_Shore,S_Shore,S_Shore	MCOLN3,MCOLN3,MCOLN3,MCOLN3	NM_018298,NM_018298,NM_018298,NM_018298	hypoM.iPSC
1	85300018	85300185	3	cg09755594,cg03604763,cg12062099	TSS1500,TSS1500,TSS1500	_,_	WDR63,WDR63,WDR63	NM_145172,NM_145172,NM_145172	hyperM.iPSC
1	85496916	85497042	2	cg09385306,cg17737388	Body;Body,Body;Body	N_Shore,N_Shore	C1orf52;C1orf52,C1orf52;C1orf52	NR_024113;NM_198077,NR_024113;NM_198077	hyperM.iPSC
1	85498242	85498480	2	cg00576075,cg05654164	TSS1500;TSS1500,TSS1500;TSS1500	S_Shore,S_Shore	C1orf52;C1orf52,C1orf52;C1orf52	NM_198077;NR_024113,NM_198077;NR_024113	hyperM.iPSC
1	85816422	85816818	3	cg00183684,cg10593400,cg17108141	1stExon;5'UTR,TSS200,TSS200	S_Shore,S_Shore,S_Shore	DDAH1;DDAH1,DDAH1,DDAH1	NM_001134445;NM_001134445,NM_001134445,NM_001134445	hyperM.iPSC
1	85820021	85821511	8	cg11750851,cg18027683,cg22123915,cg13206932,cg07602008,cg20293609,cg17499345,cg15648041	Body,Body,Body,Body,Body,Body,Body,3'UTR	S_Shore,S_Shore,S_Shore,S_Shore,S_Shore,S_Shore,S_Shore,S_Shore	CYR61,CYR61,CYR61,CYR61,CYR61,CYR61,CYR61,CYR61	NM_001554,NM_001554,NM_001554,NM_001554,NM_001554,NM_001554,NM_001554,NM_001554	hyperM.iPSC
1	85854031	85854482	5	cg01040434,cg13388692,cg19800670,cg24439713,cg23173688	_,_	N_Shore,N_Shore,Island,Island,Island	_,_	_,_	hyperM.iPSC
1	86706338	86706953	3	cg09931724,cg22181664,cg09785991	TSS1500,TSS200,TSS200	_,_	CLCA1,CLCA1,CLCA1	NM_001285,NM_001285,NM_001285	hyperM.iPSC
1	86740772	86741131	2	cg10760651,cg04896168	_,_	_,_	_,_	_,_	hypoM.iPSC
1	86790723	86791004	2	cg01118679,cg17592051	Body;Body,Body;Body	N_Shore,N_Shore	CLCA4;CLCA4,CLCA4;CLCA4	NR_024602;NM_012128,NR_024602;NM_012128	hyperM.iPSC
1	86942340	86942550	3	cg10625266,cg11204830,cg04513669	TSS1500,TSS1500,TSS1500	N_Shore,N_Shore,Island	SH3GLB1,SH3GLB1,SH3GLB1	NM_016009,NM_016009,NM_016009	hypoM.iPSC
1	87369483	87370132	3	cg26791242,cg14540297,cg25428451	Body;TSS1500;Body;TSS1500;TSS1500,Body;TSS200;Body;TSS200;TSS200,Body;TSS200;Body;TSS200;TSS200	N_Shore,N_Shore,Island	LOC339524;LOC339524;LOC339524;LOC339524;LOC339524,LOC339524;LOC339524;LOC339524;LOC339524;LOC339524,LOC339524;LOC339524;LOC339524;LOC339524;LOC339524	NR_026989;NR_026986;NR_026988;NR_026985;NR_026987,NR_026989;NR_026985;NR_026988;NR_026986;NR_026987,NR_026989;NR_026985;NR_026988;NR_026986;NR_026987	hyperM.iPSC
1	87390298	87390560	4	cg16683160,cg04246763,cg04550823,cg01516372	Body,Body,Body,Body	Island,Island,Island,Island	LOC339524,LOC339524,LOC339524,LOC339524	NR_026989,NR_026989,NR_026989,NR_026989	hypoM.iPSC
1	87565952	87566195	4	cg24394990,cg07902673,cg26801613,cg20633321	TSS1500,TSS1500,TSS1500,TSS1500	N_Shore,N_Shore,N_Shore,N_Shore	LMO4,LMO4,LMO4,LMO4	NM_006769,NM_006769,NM_006769,NM_006769	hyperM.iPSC
1	89230050	89230230	2	cg21695830,cg10631373	5'UTR;5'UTR;5'UTR;5'UTR,5'UTR;5'UTR;5'UTR;5'UTR	N_Shore,N_Shore	RBMXL1;RBMXL1;CCBL2;CCBL2,RBMXL1;RBMXL1;CCBL2;CCBL2	NM_001162536;NM_019610;NM_001008661;NM_001008662,NM_001162536;NM_019610;NM_001008661;NM_001008662	hyperM.iPSC
1	89365544	89365583	2	cg10022139,cg10199040	TSS1500,TSS1500	_,_	GBP2,GBP2	NM_004120,NM_004120	hyperM.iPSC
1	89436456	89437170	8	cg12614667,cg12058781,cg23978657,cg02482460,cg22221320,cg21365602,cg20410995,cg14563196	Body,Body,Body,Body,Body,Body,1stExon;5'UTR,1stExon;5'UTR	_,_	GBP4,GBP4,GBP4,GBP4,GBP4,GBP4,GBP4;GBP4,GBP4;GBP4	NM_052941,NM_052941,NM_052941,NM_052941,NM_052941,NM_052941,NM_052941;NM_052941,NM_052941;NM_052941	hyperM.iPSC
1	89601896	89602539	2	cg06214007,cg24959428	TSS200,5'UTR	_,_	GBP6,GBP6	NM_198460,NM_198460	hyperM.iPSC
1	89872600	89872658	2	cg00064255,cg06804564	5'UTR,5'UTR	S_Shore,S_Shore	LRRC8C,LRRC8C	NM_032270,NM_032270	hypoM.iPSC
1	90082147	90082586	3	cg11335133,cg01860897,cg11839020	5'UTR;5'UTR,5'UTR;5'UTR,5'UTR;5'UTR	Island,Island,S_Shore	LRRC8D;LRRC8D,LRRC8D;LRRC8D,LRRC8D;LRRC8D	NM_018103;NM_001134479,NM_018103;NM_001134479,NM_018103;NM_001134479	hyperM.iPSC
1	90957745	90958510	5	cg14696458,cg00088183,cg22507154,cg13361185,cg07318983	_,_	Island,Island,Island,S_Shore,S_Shore	_,_	_,_	hypoM.iPSC
1	90961902	90962839	2	cg15469272,cg17480076	_,_	Island,N_Shore	_,_	_,_	hypoM.iPSC
1	90964578	90965781	6	cg16005939,cg03974889,cg24347994,cg14663264,cg20041088,cg13844193	_,_	Island,Island,Island,Island,Island,S_Shore	_,_	_,_	hypoM.iPSC
1	90967924	90968271	2	cg04560225,cg04929932	_,_	S_Shelf,S_Shelf	_,_	_,_	hypoM.iPSC
1	91072819	91074550	11	cg17443359,cg20387429,cg18486235,cg04929703,cg00667862,cg09793883,cg00644823,cg06849504,cg00503383,cg18235734,cg17799946	_,_	N_Shore,N_Shore,N_Shore,N_Shore,N_Shore,N_Shore,Island,Island,Island,Island,S_Shore	_,_	_,_	hyperM.iPSC
1	91079551	91079665	2	cg16137250,cg10521153	_,_	_,_	_,_	_,_	hyperM.iPSC
1	91088811	91088906	3	cg11159604,cg09327714,cg25105561	_,_	N_Shore,Island,Island	_,_	_,_	hypoM.iPSC
1	92122700	92123018	3	cg00342358,cg01336162,cg17074704	5'UTR,5'UTR,5'UTR	N_Shore,N_Shore,N_Shore	TGFBR3,TGFBR3,TGFBR3	NM_003243,NM_003243,NM_003243	hyperM.iPSC
1	92124881	92125069	4	cg08848903,cg23113350,cg07557690,cg00563926	TSS1500,TSS1500,TSS1500,TSS1500	S_Shore,S_Shore,S_Shore,S_Shore	TGFBR3,TGFBR3,TGFBR3,TGFBR3	NM_003243,NM_003243,NM_003243,NM_003243	hypoM.iPSC
1	92186809	92187370	7	cg19245011,cg01515515,cg06442199,cg03421440,cg14732540,cg13299824,cg02935097	TSS1500,TSS1500,TSS1500,TSS1500,TSS1500,TSS200,TSS200	N_Shore,N_Shore,N_Shore,N_Shore,Island,Island,Island	BRDT,BRDT,BRDT,BRDT,BRDT,BRDT,BRDT	NM_207189,NM_207189,NM_207189,NM_207189,NM_207189,NM_207189,NM_207189	hyperM.iPSC
1	92267486	92267592	2	cg11585358,cg15156367	TSS1500,TSS1500	N_Shore,N_Shore	EPHX4,EPHX4	NM_173567,NM_173567	hypoM.iPSC
1	92456142	92456409	2	cg12304930,cg06211375	TSS200,5'UTR	Island,S_Shore	C1orf146,C1orf146	NM_001012425,NM_001012425	hyperM.iPSC
1	92725169	92725485	4	cg24683414,cg20125091,cg23624705,cg04777348	TSS1500;TSS200,TSS1500;TSS1500,TSS1500;TSS1500,TSS1500;TSS1500	Island,S_Shore,S_Shore,S_Shore	GFI1;GFI1,GFI1;GFI1,GFI1;GFI1,GFI1;GFI1	NM_001127216;NM_005263,NM_001127216;NM_005263,NM_001127216;NM_005263,NM_001127216;NM_005263	hypoM.iPSC
1	93068697	93069576	2	cg08610461,cg16373998	TSS1500,TSS1500	N_Shore,N_Shore	RPL5,RPL5	NM_000969,NM_000969	hyperM.iPSC
1	93685276	93685390	2	cg01196158,cg01808739	TSS1500;TSS1500;TSS1500,TSS1500;TSS1500;TSS1500	N_Shore,N_Shore	FNBP1L;FNBP1L;FNBP1L,FNBP1L;FNBP1L;FNBP1L	NM_017737;NM_001164473;NM_001024948,NM_017737;NM_001164473;NM_001024948	hyperM.iPSC
1	94117622	94118260	3	cg13502903,cg26829310,cg22807700	TSS1500,TSS1500,TSS1500	S_Shore,S_Shore,S_Shore	DNTTIP2,DNTTIP2,DNTTIP2	NM_014597,NM_014597,NM_014597	hyperM.iPSC
1	94333439	94333676	3	cg01922613,cg18185648,cg14014879	Body,Body,Body	_,_	ABCA4,ABCA4,ABCA4	NM_000350,NM_000350,NM_000350	hyperM.iPSC
1	94360460	94360493	2	cg12869058,cg09360041	TSS1500,TSS1500	_,_	ABCA4,ABCA4	NM_000350,NM_000350	hyperM.iPSC
1	94476095	94476636	2	cg09162146,cg20335213	TSS1500,TSS1500	S_Shore,S_Shore	ARHGAP29,ARHGAP29	NM_004815,NM_004815	hypoM.iPSC
1	94778910	94779565	5	cg07387634,cg12599850,cg06881898,cg04864149,cg22015527	Body,Body,Body,Body,Body	N_Shore,N_Shore,N_Shore,Island,Island	F3,F3,F3,F3,F3	NM_001993,NM_001993,NM_001993,NM_001993,NM_001993	hypoM.iPSC
1	94782265	94782658	2	cg27295434,cg15395971	_,_	S_Shore,S_Shelf	_,_	_,_	hyperM.iPSC
1	95057840	95058899	3	cg15571882,cg17599609,cg20059151	TSS1500;TSS1500,TSS1500;TSS1500,5'UTR;Body	N_Shore,N_Shore,Island	SLC44A3;SLC44A3,SLC44A3;SLC44A3,SLC44A3;SLC44A3	NM_001114106;NM_152369,NM_001114106;NM_152369,NM_152369;NM_001114106	hypoM.iPSC
1	95157776	95158523	2	cg12725834,cg12613632	Body,Body	_,_	CNN3,CNN3	NM_001839,NM_001839	hyperM.iPSC
1	95471415	95471542	2	cg01206378,cg24808901	TSS1500;TSS1500,TSS1500;TSS1500	N_Shore,N_Shore	RWDD3;RWDD3,RWDD3;RWDD3	NM_001128142;NM_015485,NM_001128142;NM_015485	hyperM.iPSC
1	95748343	95748443	3	cg07825681,cg11584101,cg14279307	_,_	_,_	_,_	_,_	hyperM.iPSC
1	98899211	98899292	2	cg11952714,cg24841257	TSS1500;TSS1500,TSS1500;TSS1500	N_Shore,N_Shore	SNX7;SNX7,SNX7;SNX7	NM_015976;NM_152238,NM_015976;NM_152238	hyperM.iPSC
1	99241911	99242222	2	cg20318156,cg24373253	Body;Body,Body;Body	N_Shore,N_Shore	LPPR5;LPPR5,LPPR5;LPPR5	NM_001010861;NM_001037317,NM_001010861;NM_001037317	hypoM.iPSC
1	99883975	99884437	4	cg27563423,cg00729875,cg07960762,cg24603803	TSS200,1stExon;5'UTR,1stExon;5'UTR,1stExon;5'UTR	_,_	PALMD,PALMD;PALMD,PALMD;PALMD,PALMD;PALMD	NM_017734,NM_017734;NM_017734,NM_017734;NM_017734,NM_017734;NM_017734	hyperM.iPSC
1	100207800	100207846	2	cg04506601,cg06426831	TSS1500,TSS1500	N_Shore,N_Shore	SLC35A3,SLC35A3	NM_012243,NM_012243	hyperM.iPSC
1	100370004	100370048	2	cg17398283,cg16514995	Body;TSS1500,Body;TSS1500	N_Shore,N_Shore	SASS6;CCDC76,SASS6;CCDC76	NM_194292;NM_019083,NM_194292;NM_019083	hyperM.iPSC
1	100776222	100776276	2	cg09408571,cg06223162	TSS200,TSS200	N_Shore,N_Shore	GPR88,GPR88	NM_022049,NM_022049	hyperM.iPSC
1	100956920	100958636	3	cg04295372,cg25762679,cg27544046	TSS1500;TSS1500,1stExon;1stExon;5'UTR;5'UTR,Body;Body	_,_	VCAM1;VCAM1,VCAM1;VCAM1;VCAM1;VCAM1,VCAM1;VCAM1	NM_080682;NM_001078,NM_080682;NM_001078;NM_001078;NM_080682,NM_001078;NM_080682	hyperM.iPSC
1	101137312	101137775	2	cg16925880,cg13089765	Body;Body,Body;Body	S_Shelf,S_Shelf	SLC30A7;SLC30A7,SLC30A7;SLC30A7	NM_133496;NM_001144884,NM_133496;NM_001144884	hyperM.iPSC
1	102234631	102235465	5	cg03104428,cg05590735,cg23631062,cg16510022,cg09864076	Body,Body,TSS200,TSS200,TSS200	_,_	OLFM3,OLFM3,OLFM3,OLFM3,OLFM3	NM_058170,NM_058170,NM_058170,NM_058170,NM_058170	hyperM.iPSC
1	103347207	103347546	2	cg16968885,cg26913669	TSS1500;TSS1500;TSS1500;TSS1500,TSS1500;TSS1500;TSS1500;TSS1500	_,_	COL11A1;COL11A1;COL11A1;COL11A1,COL11A1;COL11A1;COL11A1;COL11A1	NM_001168249;NM_080629;NM_080630;NM_001854,NM_001168249;NM_080629;NM_080630;NM_001854	hypoM.iPSC
1	104417132	104417641	2	cg01394944,cg11078326	_,_	_,_	_,_	_,_	hyperM.iPSC
1	106425304	106425490	3	cg10779492,cg06086598,cg10774181	_,_	Island,Island,S_Shore	_,_	_,_	hyperM.iPSC
1	107824290	107825005	6	cg09940267,cg24346905,cg20016673,cg21606490,cg12211867,cg26015416	Body;Body;Body,Body;Body;Body,Body;Body;Body,Body;Body;Body,Body;Body;Body,3'UTR;3'UTR;3'UTR	N_Shore,Island,Island,Island,Island,S_Shore	NTNG1;NTNG1;NTNG1,NTNG1;NTNG1;NTNG1,NTNG1;NTNG1;NTNG1,NTNG1;NTNG1;NTNG1,NTNG1;NTNG1;NTNG1,NTNG1;NTNG1;NTNG1	NM_014917;NM_001113228;NM_001113226,NM_014917;NM_001113228;NM_001113226,NM_014917;NM_001113228;NM_001113226,NM_014917;NM_001113228;NM_001113226,NM_014917;NM_001113228;NM_001113226,NM_014917;NM_001113226;NM_001113228	hyperM.iPSC
1	109386618	109386913	3	cg00580689,cg13908395,cg19695867	TSS1500;TSS1500;TSS1500,TSS1500;TSS1500;TSS1500,TSS1500;TSS1500;TSS1500	S_Shore,S_Shore,S_Shore	WDR47;WDR47;WDR47,WDR47;WDR47;WDR47,WDR47;WDR47;WDR47	NM_001142550;NM_014969;NM_001142551,NM_001142550;NM_014969;NM_001142551,NM_001142550;NM_014969;NM_001142551	hyperM.iPSC
1	109456726	109457963	3	cg26523099,cg19378640,cg09820792	Body;TSS1500,Body;TSS1500,TSS200;5'UTR;1stExon	N_Shore,Island,Island	C1orf194;KIAA1324,C1orf194;KIAA1324,KIAA1324;C1orf194;C1orf194	NM_001122961;NM_020775,NM_001122961;NM_020775,NM_020775;NM_001122961;NM_001122961	hyperM.iPSC
1	109617724	109617803	2	cg14036828,cg17243654	Body,Body	_,_	CELSR2,CELSR2	NM_001408,NM_001408	hyperM.iPSC
1	109627826	109627940	2	cg09502502,cg18965989	TSS1500;TSS1500;TSS1500;TSS1500,TSS1500;TSS1500;TSS1500;TSS1500	S_Shore,S_Shore	PSRC1;PSRC1;PSRC1;PSRC1,PSRC1;PSRC1;PSRC1;PSRC1	NM_001032290;NM_001005290;NM_001032291;NM_032636,NM_001032290;NM_001005290;NM_001032291;NM_032636	hyperM.iPSC
1	109651228	109652009	4	cg22076757,cg08872703,cg04012600,cg07196577	TSS200,TSS200,TSS1500,TSS1500	_,_	MYBPHL,MYBPHL,MYBPHL,MYBPHL	NM_001010985,NM_001010985,NM_001010985,NM_001010985	hyperM.iPSC
1	109837193	109838094	4	cg09372525,cg12597839,cg11249215,cg12589307	TSS1500;TSS1500;TSS1500;TSS1500;TSS1500,TSS1500;TSS1500;TSS1500;TSS1500;TSS1500,TSS200;TSS200;TSS200;TSS200;TSS200,TSS200;TSS200;TSS200;TSS200;TSS200	N_Shore,N_Shore,Island,Island	CYB561D1;CYB561D1;CYB561D1;CYB561D1;CYB561D1,CYB561D1;CYB561D1;CYB561D1;CYB561D1;CYB561D1,CYB561D1;CYB561D1;CYB561D1;CYB561D1;CYB561D1,CYB561D1;CYB561D1;CYB561D1;CYB561D1;CYB561D1	NM_001134403;NM_182580;NM_001134402;NM_001134400;NM_001134404,NM_001134403;NM_182580;NM_001134402;NM_001134400;NM_001134404,NM_001134404;NM_001134402;NM_001134400;NM_001134403;NM_182580,NM_001134404;NM_001134402;NM_001134400;NM_001134403;NM_182580	hyperM.iPSC
1	109883084	109884447	5	cg10114625,cg19924468,cg00521434,cg26155492,cg23749046	TSS1500,TSS1500,TSS1500,TSS200,5'UTR	_,_	GPR61,GPR61,GPR61,GPR61,GPR61	NM_031936,NM_031936,NM_031936,NM_031936,NM_031936	hyperM.iPSC
1	109968086	109968187	3	cg16140253,cg20253872,cg27565899	Body;Body;TSS1500,Body;Body;TSS1500,Body;Body;TSS1500	S_Shelf,S_Shelf,S_Shelf	AMPD2;AMPD2;AMPD2,AMPD2;AMPD2;AMPD2,AMPD2;AMPD2;AMPD2	NM_139156;NM_004037;NM_203404,NM_139156;NM_004037;NM_203404,NM_139156;NM_004037;NM_203404	hyperM.iPSC
1	109999379	109999763	2	cg11903880,cg21451998	TSS1500;TSS1500;TSS1500,TSS1500;TSS1500;TSS1500	N_Shore,N_Shore	GSTM4;GSTM4;GSTM4,GSTM4;GSTM4;GSTM4	NM_147148;NM_000850;NR_024538,NM_147148;NM_000850;NR_024538	hyperM.iPSC
1	110055500	110056419	2	cg13464436,cg14377951	TSS1500,1stExon;5'UTR	_,_	GSTM5,GSTM5;GSTM5	NM_000851,NM_000851;NM_000851	hyperM.iPSC
1	110085946	110086486	2	cg26020161,cg00388838	TSS1500;TSS1500,TSS1500;TSS1500	S_Shore,S_Shore	GSTM3;GSTM3,GSTM3;GSTM3	NM_000849;NR_024537,NM_000849;NR_024537	hyperM.iPSC
1	110109334	110109435	2	cg06281016,cg17875320	TSS1500;TSS1500;TSS1500,TSS1500;TSS1500;TSS1500	_,_	EPS8L3;EPS8L3;EPS8L3,EPS8L3;EPS8L3;EPS8L3	NM_024526;NM_139053;NM_133181,NM_024526;NM_139053;NM_133181	hyperM.iPSC
1	110253895	110254005	2	cg08139855,cg07568430	TSS1500;TSS1500;TSS1500;TSS1500,TSS1500;TSS1500;TSS1500;TSS1500	N_Shore,N_Shore	CSF1;CSF1;CSF1;CSF1,CSF1;CSF1;CSF1;CSF1	NM_172212;NM_000757;NM_172211;NM_172210,NM_172212;NM_000757;NM_172211;NM_172210	hyperM.iPSC
1	110327714	110328635	3	cg24681307,cg02152578,cg02085805	TSS1500,TSS1500,TSS200	N_Shore,N_Shore,N_Shore	AHCYL1,AHCYL1,AHCYL1	NM_006621,NM_006621,NM_006621	hyperM.iPSC
1	110411496	110415119	15	cg04975966,cg01572884,cg13803688,cg18786873,cg00484358,cg11071207,cg06215569,cg22494858,cg23871640,cg10023272,cg06809252,cg02011351,cg19092096,cg05622465,cg16127759	Body,Body,Body,Body,Body,Body,Body,Body,Body,Body,Body,Body,Body,1stExon,TSS1500	N_Shore,Island,Island,Island,Island,Island,Island,Island,Island,Island,Island,Island,Island,Island,S_Shore	ALX3,ALX3,ALX3,ALX3,ALX3,ALX3,ALX3,ALX3,ALX3,ALX3,ALX3,ALX3,ALX3,ALX3,ALX3	NM_006492,NM_006492,NM_006492,NM_006492,NM_006492,NM_006492,NM_006492,NM_006492,NM_006492,NM_006492,NM_006492,NM_006492,NM_006492,NM_006492,NM_006492	hypoM.iPSC
1	110427589	110429113	4	cg21830222,cg23660154,cg08471800,cg13372811	_,_	N_Shore,Island,Island,S_Shore	_,_	_,_	hypoM.iPSC
1	110474292	110474842	4	cg27432826,cg02103924,cg25207248,cg04043150	_,_	N_Shore,Island,Island,Island	_,_	_,_	hyperM.iPSC
1	110517187	110518156	2	cg11828251,cg19866406	Body,Body	_,_	SLC6A17,SLC6A17	NM_001010898,NM_001010898	hyperM.iPSC
1	110536147	110536635	2	cg04208466,cg12072789	Body,Body	_,_	SLC6A17,SLC6A17	NM_001010898,NM_001010898	hyperM.iPSC
1	110553570	110553830	3	cg20966270,cg02193146,cg21217540	_,_	N_Shore,Island,Island	_,_	_,_	hypoM.iPSC
1	110567189	110567904	2	cg11404402,cg20999737	Body;Body;Body,Body;Body;Body	Island,S_Shore	KCNC4;KCNC4;KCNC4,KCNC4;KCNC4;KCNC4	NM_001039574;NM_153763;NM_004978,NM_001039574;NM_153763;NM_004978	hyperM.iPSC
1	110577077	110578069	2	cg01522553,cg06807905	Body;3'UTR,3'UTR;3'UTR	_,_	KCNC4;KCNC4,KCNC4;KCNC4	NM_001039574;NM_004978,NM_001039574;NM_004978	hyperM.iPSC
1	110734868	110735850	4	cg25320780,cg00961640,cg17749509,cg03535830	5'UTR,TSS200,TSS1500,TSS1500	_,_	SLC16A4,SLC16A4,SLC16A4,SLC16A4	NM_004696,NM_004696,NM_004696,NM_004696	hyperM.iPSC
1	110751086	110752597	6	cg09368875,cg01700472,cg12702097,cg20982476,cg10322499,cg00410422	Body,5'UTR;1stExon,TSS200,TSS1500,TSS1500,TSS1500	N_Shore,Island,S_Shore,S_Shore,S_Shore,S_Shore	HBXIP,HBXIP;HBXIP,HBXIP,HBXIP,HBXIP,HBXIP	NM_006402,NM_006402;NM_006402,NM_006402,NM_006402,NM_006402,NM_006402	hyperM.iPSC
1	110795047	110795375	4	cg18434152,cg13468036,cg08535756,cg21324308	TSS1500,TSS1500,TSS200,1stExon	_,_	PROK1,PROK1,PROK1,PROK1	NM_032414,NM_032414,NM_032414,NM_032414	hyperM.iPSC
1	110824297	110824354	2	cg25381737,cg07376219	TSS1500,TSS1500	_,_	CYMP,CYMP	NR_003599,NR_003599	hyperM.iPSC
1	110862897	110863650	4	cg07830847,cg12957986,cg04299028,cg12604192	1stExon,TSS200,TSS200,TSS1500	_,_	KCNA10,KCNA10,KCNA10,KCNA10	NM_005549,NM_005549,NM_005549,NM_005549	hyperM.iPSC
1	111017523	111018184	2	cg14200574,cg21286921	1stExon,1stExon	N_Shore,Island	KCNA3,KCNA3	NM_002232,NM_002232	hyperM.iPSC
1	111019602	111019810	4	cg07903677,cg03483626,cg00995520,cg07421287	TSS1500,TSS1500,TSS1500,TSS1500	S_Shore,S_Shore,S_Shore,S_Shore	KCNA3,KCNA3,KCNA3,KCNA3	NM_002232,NM_002232,NM_002232,NM_002232	hypoM.iPSC
1	111124747	111124944	3	cg05183966,cg25283465,cg22871908	_,_	Island,Island,Island	_,_	_,_	hyperM.iPSC
1	111215166	111217304	5	cg16896205,cg07314983,cg10105218,cg10516886,cg03043417	TSS200,TSS1500;5'UTR,TSS1500;5'UTR,TSS1500;5'UTR,1stExon;5'UTR;5'UTR	_,_	CD53,CD53;CD53,CD53;CD53,CD53;CD53,CD53;CD53;CD53	NM_001040033,NM_000560;NM_001040033,NM_000560;NM_001040033,NM_000560;NM_001040033,NM_000560;NM_001040033;NM_000560	hyperM.iPSC
1	111308426	111308527	2	cg16524830,cg15566506	TSS1500;TSS1500,TSS1500;TSS1500	Island,Island	C1orf103;C1orf103,C1orf103;C1orf103	NM_018372;NM_001006945,NM_018372;NM_001006945	hyperM.iPSC
1	111485324	111485483	2	cg16164356,cg27234129	TSS1500;5'UTR;5'UTR,TSS1500;5'UTR;5'UTR	S_Shore,S_Shore	DRAM2;CEPT1;CEPT1,DRAM2;CEPT1;CEPT1	NM_178454;NM_006090;NM_001007794,NM_178454;NM_006090;NM_001007794	hyperM.iPSC
1	111544038	111545832	6	cg26518580,cg24641737,cg00619207,cg19268695,cg20970369,cg09826895	Body,1stExon;5'UTR,TSS200,TSS200,TSS1500,TSS1500	N_Shelf,N_Shelf,N_Shelf,N_Shelf,N_Shelf,N_Shelf	DENND2D,DENND2D;DENND2D,DENND2D,DENND2D,DENND2D,DENND2D	NM_024901,NM_024901;NM_024901,NM_024901,NM_024901,NM_024901,NM_024901	hyperM.iPSC
1	111570360	111572241	6	cg03916225,cg09516523,cg01440333,cg26366091,cg10045881,cg14414943	TSS1500;TSS1500,TSS1500;TSS1500,TSS200;TSS200,TSS200;TSS200,1stExon;5'UTR;5'UTR;1stExon,Body;Body	_,_	CHI3L2;CHI3L2,CHI3L2;CHI3L2,CHI3L2;CHI3L2,CHI3L2;CHI3L2,CHI3L2;CHI3L2;CHI3L2;CHI3L2,CHI3L2;CHI3L2	NM_001025197;NM_004000,NM_001025197;NM_004000,NM_001025197;NM_004000,NM_001025197;NM_004000,NM_001025197;NM_004000;NM_001025197;NM_004000,NM_001025197;NM_004000	hyperM.iPSC
1	111614830	111615669	4	cg25755804,cg23279117,cg10989634,cg21871952	_,_	N_Shore,Island,Island,S_Shore	_,_	_,_	hyperM.iPSC
1	111623566	111623591	2	cg21527708,cg09333723	TSS1500,TSS1500	_,_	LOC149620,LOC149620	NR_003928,NR_003928	hyperM.iPSC
1	111633632	111633790	2	cg08129490,cg17143643	TSS1500;TSS1500,TSS1500;TSS1500	_,_	CHIA;CHIA,CHIA;CHIA	NM_021797;NM_201653,NM_021797;NM_201653	hyperM.iPSC
1	111771388	111772054	3	cg18945039,cg17798659,cg09558502	Body,Body,TSS200	_,_	OVGP1,OVGP1,OVGP1	NM_002557,NM_002557,NM_002557	hyperM.iPSC
1	111792358	111792407	2	cg06441150,cg12955127	Body;TSS1500,Body;TSS1500	N_Shore,N_Shore	WDR77;ATP5F1,WDR77;ATP5F1	NM_024102;NM_001688,NM_024102;NM_001688	hyperM.iPSC
1	111847549	111849019	3	cg15673896,cg25674286,cg24342094	Body;5'UTR;5'UTR;1stExon;1stExon,Body;TSS200;TSS200,Body;TSS1500;TSS1500	_,_	ADORA3;ADORA3;ADORA3;ADORA3;ADORA3,ADORA3;ADORA3;ADORA3,ADORA3;ADORA3;ADORA3	NM_001081976;NM_000677;NM_020683;NM_020683;NM_000677,NM_001081976;NM_020683;NM_000677,NM_001081976;NM_020683;NM_000677	hyperM.iPSC
1	111859759	111860273	4	cg08256939,cg07314829,cg14669379,cg00543976	Body,Body,Body,Body	Island,Island,Island,S_Shore	ADORA3,ADORA3,ADORA3,ADORA3	NM_001081976,NM_001081976,NM_001081976,NM_001081976	hyperM.iPSC
1	112240213	112240269	2	cg04228428,cg03525385	Body;Body,Body;Body	_,_	KCND3;KCND3,KCND3;KCND3	NM_172198;NM_004980,NM_172198;NM_004980	hyperM.iPSC
1	112329063	112329684	2	cg22040158,cg17898124	5'UTR;5'UTR,5'UTR;5'UTR	S_Shelf,N_Shelf	KCND3;KCND3,KCND3;KCND3	NM_172198;NM_004980,NM_172198;NM_004980	hyperM.iPSC
1	112853690	112854086	2	cg07005055,cg25320499	Body;Body,Body;Body	Island,S_Shore	WNT2B;WNT2B,WNT2B;WNT2B	NM_024494;NM_004185,NM_024494;NM_004185	hypoM.iPSC
1	113017905	113018352	3	cg03417473,cg10114555,cg05306395	TSS1500;TSS1500,TSS1500;TSS1500,TSS1500;TSS1500	N_Shore,N_Shore,N_Shore	MOV10;MOV10,MOV10;MOV10,MOV10;MOV10	NM_001130079;NM_020963,NM_001130079;NM_020963,NM_001130079;NM_020963	hyperM.iPSC
1	113063011	113063417	6	cg26044038,cg10839663,cg16716189,cg26190476,cg23746359,cg15070208	_,TSS1500;TSS1500,TSS1500;TSS1500,TSS1500;TSS1500,TSS1500;TSS1500	Island,Island,Island,Island,Island,S_Shore	_,FAM19A3;FAM19A3,FAM19A3;FAM19A3,FAM19A3;FAM19A3,FAM19A3;FAM19A3	_,NM_001004440;NM_182759,NM_001004440;NM_182759,NM_001004440;NM_182759,NM_001004440;NM_182759	hyperM.iPSC
1	113067125	113067406	5	cg21286782,cg05243438,cg10806711,cg16255156,cg03918071	Body;Body,Body;Body,Body;Body,Body;Body,Body;Body	Island,Island,Island,Island,S_Shore	FAM19A3;FAM19A3,FAM19A3;FAM19A3,FAM19A3;FAM19A3,FAM19A3;FAM19A3,FAM19A3;FAM19A3	NM_182759;NM_001004440,NM_182759;NM_001004440,NM_182759;NM_001004440,NM_182759;NM_001004440,NM_182759;NM_001004440	hypoM.iPSC
1	113086641	113086910	2	cg05708536,cg25707805	_,_	N_Shore,N_Shore	_,_	_,_	hyperM.iPSC
1	113087920	113088761	5	cg11685510,cg13060157,cg22865470,cg12549600,cg19936157	_,_	Island,Island,Island,Island,S_Shore	_,_	_,_	hyperM.iPSC
1	113091538	113092614	3	cg05127077,cg04895202,cg19157736	_,_	S_Shelf,S_Shelf,S_Shelf	_,_	_,_	hyperM.iPSC
1	113301051	113301852	2	cg02569658,cg07176692	TSS1500;TSS1500,TSS1500	S_Shore,S_Shore	SLC16A1;SLC16A1,SLC16A1	NM_003051;NM_001166496,NM_003051	hyperM.iPSC
1	114215835	114215931	2	cg00916635,cg00041401	5'UTR;1stExon;5'UTR;1stExon,TSS200;TSS200	_,_	PTPN22;PTPN22;PTPN22;PTPN22,PTPN22;PTPN22	NM_012411;NM_012411;NM_015967;NM_015967,NM_012411;NM_015967	hyperM.iPSC
1	114322824	114324193	4	cg13393917,cg22020227,cg26824174,cg17253459	TSS1500,TSS1500,Body,Body	_,_	OLFML3,OLFML3,OLFML3,OLFML3	NM_020190,NM_020190,NM_020190,NM_020190	hyperM.iPSC
1	114498164	114499971	15	cg21920775,cg01567634,cg03514545,cg22646710,cg08883066,cg15976388,cg19901801,cg19874857,cg12804010,cg12097117,cg06620092,cg00764109,cg26426632,cg12728020,cg13931292	TSS200,TSS200,TSS1500,TSS1500,TSS1500,TSS1500,TSS1500,TSS1500,TSS1500,TSS1500,TSS1500,TSS1500,TSS1500,_	Island,Island,N_Shore,N_Shore,N_Shore,Island,Island,Island,Island,S_Shore,S_Shore,S_Shore,S_Shore,S_Shore,S_Shore	SYT6,SYT6,SYT6,SYT6,SYT6,SYT6,SYT6,SYT6,SYT6,SYT6,SYT6,SYT6,SYT6,_	NM_205848,NM_205848,NM_205848,NM_205848,NM_205848,NM_205848,NM_205848,NM_205848,NM_205848,NM_205848,NM_205848,NM_205848,NM_205848,_	hyperM.iPSC
1	115039736	115040017	2	cg05499890,cg23523368	TSS200,TSS1500	_,_	AMPD1,AMPD1	NM_000036,NM_000036	hyperM.iPSC
1	115197800	115199646	8	cg03964233,cg09685601,cg04115969,cg18087477,cg27332337,cg10440578,cg18396987,cg12813768	TSS1500,TSS1500,TSS200,1stExon;5'UTR,1stExon;5'UTR,5'UTR,5'UTR,Body	N_Shore,N_Shore,Island,Island,Island,Island,S_Shore,S_Shore	SYCP1,SYCP1,SYCP1,SYCP1;SYCP1,SYCP1;SYCP1,SYCP1,SYCP1,SYCP1	NM_003176,NM_003176,NM_003176,NM_003176;NM_003176,NM_003176;NM_003176,NM_003176,NM_003176,NM_003176	hyperM.iPSC
1	115623856	115624494	2	ch.1.2707897R,cg13174306	_,_	_,_	_,_	_,_	hyperM.iPSC
1	115682782	115683067	2	cg25067242,cg02987481	TSS1500,TSS1500	Island,S_Shore	NGF,NGF	NM_002506,NM_002506	hypoM.iPSC
1	116112235	116113084	3	cg05190718,cg18942631,cg17903306	Body,5'UTR;1stExon,TSS200	_,_	CASQ2,CASQ2;CASQ2,CASQ2	NM_001232,NM_001232;NM_001232,NM_001232	hyperM.iPSC
1	116173325	116173394	2	cg17481936,cg23952578	_,_	S_Shore,S_Shore	_,_	_,_	hypoM.iPSC
1	116511750	116511854	2	cg02452639,cg00969087	_,_	Island,Island	_,_	_,_	hypoM.iPSC
1	116762421	116763195	3	cg05565562,cg17182302,cg21268653	Body;Body;Body;Body;Body,TSS1500;TSS1500;TSS1500;TSS1500;TSS1500,TSS1500;TSS1500;TSS1500;TSS1500;TSS1500	N_Shore,Island,S_Shore	C1orf203;C1orf203;C1orf203;C1orf203;C1orf203,C1orf203;C1orf203;C1orf203;C1orf203;C1orf203,C1orf203;C1orf203;C1orf203;C1orf203;C1orf203	NR_024126;NR_027646;NR_024124;NR_024125;NR_027645,NR_027645;NR_024126;NR_024124;NR_027646;NR_024125,NR_027645;NR_024126;NR_024124;NR_027646;NR_024125	hyperM.iPSC
1	117014905	117015686	4	cg05156532,cg25023761,cg04390865,cg18274788	TSS1500,TSS1500,TSS1500,TSS1500	S_Shelf,S_Shelf,S_Shelf,S_Shelf	MIR320B1,MIR320B1,MIR320B1,MIR320B1	NR_031564,NR_031564,NR_031564,NR_031564	hyperM.iPSC
1	117085783	117086325	3	cg13112946,cg04463636,cg25030515	_,_	N_Shore,Island,S_Shore	_,_	_,_	hyperM.iPSC
1	117222744	117222852	2	cg15481370,cg15485700	_,_	_,_	_,_	_,_	hyperM.iPSC
1	117437073	117437344	2	cg10488685,cg09099500	Body,TSS1500;Body	_,_	TTF2,MIR942;TTF2	NM_003594,NR_030640;NM_003594	hyperM.iPSC
1	117554836	117555488	5	cg22424746,cg16408593,cg15597855,cg24006253,cg27446185	Body,TSS200,TSS200,TSS200,TSS1500	_,_	VTCN1,VTCN1,VTCN1,VTCN1,VTCN1	NM_024626,NM_024626,NM_024626,NM_024626,NM_024626	hyperM.iPSC
1	117967185	117967925	5	cg17181598,cg04720592,cg21419585,cg24498500,cg22424284	Body,Body,Body,Body,Body	_,_	FAM46C,FAM46C,FAM46C,FAM46C,FAM46C	NM_017709,NM_017709,NM_017709,NM_017709,NM_017709	hyperM.iPSC
1	119335611	119337811	10	cg06528645,cg21301805,cg07817024,cg07961512,cg17326555,cg22871653,cg24035245,cg24041917,cg19300924,cg17436134	_,_	N_Shore,N_Shore,N_Shore,N_Shore,Island,Island,Island,Island,S_Shore,S_Shore	_,_	_,_	hypoM.iPSC
1	119341261	119341567	2	cg09815769,cg14204462	_,_	N_Shelf,N_Shelf	_,_	_,_	hypoM.iPSC
1	119343682	119344152	6	cg25386234,cg13107768,cg24434800,cg00667647,cg26856924,cg27268556	_,_	N_Shore,N_Shore,N_Shore,N_Shore,N_Shore,N_Shore	_,_	_,_	hypoM.iPSC
1	119350050	119350348	2	cg15724945,cg01959730	_,_	N_Shore,N_Shore	_,_	_,_	hypoM.iPSC
1	119351471	119352007	3	cg22002034,cg25771271,cg13933734	_,_	Island,Island,Island	_,_	_,_	hypoM.iPSC
1	119672001	119672325	2	cg04784699,cg26559808	_,_	Island,S_Shore	_,_	_,_	hypoM.iPSC
1	119712523	119713003	2	cg08055612,cg03762535	TSS1500;TSS1500,5'UTR;1stExon;5'UTR;1stExon	_,_	HAO2;HAO2,HAO2;HAO2;HAO2;HAO2	NM_016527;NM_001005783,NM_001005783;NM_016527;NM_016527;NM_001005783	hyperM.iPSC
1	119759492	119759564	2	cg04087608,cg09371351	5'UTR;5'UTR,5'UTR;5'UTR	_,_	HSD3B2;HSD3B2,HSD3B2;HSD3B2	NM_001166120;NM_000198,NM_001166120;NM_000198	hyperM.iPSC
1	119975512	119976324	5	cg25216580,cg19496978,cg03601828,cg06814792,cg17501774	5'UTR,5'UTR,5'UTR,5'UTR,5'UTR	_,_	ZNF697,ZNF697,ZNF697,ZNF697,ZNF697	NM_001080470,NM_001080470,NM_001080470,NM_001080470,NM_001080470	hyperM.iPSC
1	120055000	120055700	2	cg10827253,cg05958127	TSS1500,TSS1500	N_Shore,N_Shore	PHGDH,PHGDH	NM_006623,NM_006623	hyperM.iPSC
1	120138506	120139316	2	cg00303919,cg26017874	3'UTR;3'UTR,Body;Body	_,_	REG4;REG4,REG4;REG4	NM_001159352;NM_032044,NM_001159352;NM_032044	hyperM.iPSC
1	143304698	143304700	2	cg22122572,cg26160235	_,_	Island,Island	_,_	_,_	hyperM.iPSC
1	143641929	143642321	2	cg21608225,cg02854922	Body;Body;Body,1stExon;Body;Body	N_Shore,N_Shore	PDE4DIP;PDE4DIP;PDE4DIP,PDE4DIP;PDE4DIP;PDE4DIP	NM_001002811;NM_001002812;NM_014644,NM_001002811;NM_001002812;NM_014644	hyperM.iPSC
1	144096691	144096748	2	cg08932233,cg00701051	_,_	Island,Island	_,_	_,_	hyperM.iPSC
1	144300891	144301286	3	cg00394712,cg01950958,cg16928044	TSS200,TSS1500,TSS1500	Island,S_Shore,S_Shore	NUDT17,NUDT17,NUDT17	NM_001012758,NM_001012758,NM_001012758	hyperM.iPSC
1	144425367	144425500	3	cg06095777,cg11743829,cg25221984	5'UTR,5'UTR,5'UTR	Island,Island,Island	CD160,CD160,CD160	NM_007053,NM_007053,NM_007053	hyperM.iPSC
1	144438336	144439119	4	cg19353949,cg07164556,cg05803361,cg10321723	TSS1500,TSS1500,TSS1500,5'UTR	_,_	PDZK1,PDZK1,PDZK1,PDZK1	NM_002614,NM_002614,NM_002614,NM_002614	hyperM.iPSC
1	145116394	145116475	3	cg12136274,cg05774978,cg24947451	Body,Body,Body	Island,Island,Island	PDIA3P,PDIA3P,PDIA3P	NR_002305,NR_002305,NR_002305	hyperM.iPSC
1	145180540	145180643	4	cg07572770,cg21917976,cg11120551,cg11983977	TSS1500,TSS1500,TSS1500,TSS1500	N_Shore,N_Shore,N_Shore,N_Shore	CHD1L,CHD1L,CHD1L,CHD1L	NM_004284,NM_004284,NM_004284,NM_004284	hyperM.iPSC
1	145479412	145479426	2	cg13195895,cg24307292	TSS1500,TSS1500	_,_	BCL9,BCL9	NM_004326,NM_004326	hypoM.iPSC
1	145696833	145699232	5	cg06124285,cg08894131,cg00421368,cg26558992,cg07975634	3'UTR;3'UTR,Body;Body,5'UTR;5'UTR,5'UTR;5'UTR,1stExon;5'UTR;5'UTR	_,_	GJA5;GJA5,GJA5;GJA5,GJA5;GJA5,GJA5;GJA5,GJA5;GJA5;GJA5	NM_005266;NM_181703,NM_181703;NM_005266,NM_181703;NM_005266,NM_181703;NM_005266,NM_181703;NM_181703;NM_005266	hyperM.iPSC
1	145711792	145712778	5	cg02173484,cg08307963,cg17941330,cg26191449,cg11423701	5'UTR,TSS200,TSS200,TSS200,TSS1500	_,_	GJA5,GJA5,GJA5,GJA5,GJA5	NM_005266,NM_005266,NM_005266,NM_005266,NM_005266	hyperM.iPSC
1	145841213	145841591	3	cg16574962,cg11385094,cg16023912	TSS1500,TSS200,5'UTR;1stExon	_,_	GJA8,GJA8,GJA8;GJA8	NM_005267,NM_005267,NM_005267;NM_005267	hyperM.iPSC
1	145846588	145846958	3	cg18024684,cg05161602,cg11153057	5'UTR,Body,Body	N_Shore,Island,Island	GJA8,GJA8,GJA8	NM_005267,NM_005267,NM_005267	hyperM.iPSC
1	146219447	146219516	3	cg02909688,cg05959459,cg19250989	_,_	N_Shore,Island,Island	_,_	_,_	hyperM.iPSC
1	146256597	146257282	3	cg10537450,cg25200152,cg06804778	_,_	Island,S_Shore,S_Shore	_,_	_,_	hyperM.iPSC
1	146267368	146268061	3	cg15548446,cg03951833,cg04869838	_,_	_,_	_,_	_,_	hyperM.iPSC
1	146273593	146273816	3	cg01511022,cg20769700,cg04494789	_,_	Island,Island,S_Shore	_,_	_,_	hyperM.iPSC
1	146822271	146822273	2	cg18404366,cg18242427	_,_	Island,Island	_,_	_,_	hyperM.iPSC
1	147130819	147132216	5	cg00094044,cg26836685,cg13494933,cg06872981,cg17009073	_,_	N_Shore,N_Shore,Island,Island,S_Shore	_,_	_,_	hyperM.iPSC
1	147167747	147169079	3	cg07719261,cg01925498,cg05650810	_,_	N_Shore,N_Shore,Island	_,_	_,_	hyperM.iPSC
1	147196694	147196844	2	cg25095697,cg00097790	TSS1500;Body;Body,TSS200;Body;Body	_,_	LOC645166;LOC645166;LOC645166,LOC645166;LOC645166;LOC645166	NR_027354;NR_027356;NR_027355,NR_027354;NR_027356;NR_027355	hyperM.iPSC
1	147336355	147336473	2	cg02671421,cg08639839	_,_	_,_	_,_	_,_	hyperM.iPSC
1	147404132	147405075	4	cg20768669,cg01105140,cg13529755,cg21273659	_,_	N_Shore,Island,Island,S_Shore	_,_	_,_	hyperM.iPSC
1	147410785	147411706	3	cg02393684,cg19635571,cg16661522	_,_	N_Shelf,N_Shore,N_Shore	_,_	_,_	hyperM.iPSC
1	147413096	147414936	7	cg00822399,cg15067806,cg13911828,cg19769301,cg04876245,cg19736968,cg27587661	_,_	Island,N_Shore,N_Shore,N_Shore,Island,Island,Island	_,_	_,_	hyperM.iPSC
1	147415938	147416315	4	cg00121030,cg02153358,cg25435819,cg15686402	_,_	Island,Island,Island,S_Shore	_,_	_,_	hyperM.iPSC
1	147421802	147423294	5	cg10502924,cg23034922,cg19343566,cg26355755,cg06921319	_,_	N_Shore,N_Shore,Island,Island,Island	_,_	_,_	hyperM.iPSC
1	147429054	147429142	3	cg23106045,cg09139923,cg21937395	_,_	Island,Island,Island	_,_	_,_	hyperM.iPSC
1	147436597	147436976	5	cg01062913,cg13787167,cg19775250,cg01419577,cg11981932	_,_	_,_	_,_	_,_	hyperM.iPSC
1	147453015	147453231	2	cg22700790,cg21404935	_,_	_,_	_,_	_,_	hyperM.iPSC
1	147497406	147497926	2	cg11154559,cg04776597	_,_	Island,S_Shore	_,_	_,_	hyperM.iPSC
1	147499587	147500123	4	cg11333681,cg05783727,cg14530937,cg16021903	_,_	S_Shore,S_Shore,S_Shelf,S_Shelf	_,_	_,_	hyperM.iPSC
1	147544982	147545442	2	cg05198938,cg10222850	TSS1500,TSS1500	_,_	LOC388692,LOC388692	NR_027002,NR_027002	hyperM.iPSC
1	148174709	148175230	5	cg05750047,cg00339782,cg13476072,cg00777271,cg02086349	Body;5'UTR;1stExon,Body;5'UTR;1stExon,Body;TSS200,1stExon;TSS1500,5'UTR;1stExon;TSS1500	_,_	MTMR11;MTMR11;MTMR11,MTMR11;MTMR11;MTMR11,MTMR11;MTMR11,MTMR11;MTMR11,MTMR11;MTMR11;MTMR11	NM_001145862;NM_181873;NM_181873,NM_001145862;NM_181873;NM_181873,NM_001145862;NM_181873,NM_001145862;NM_181873,NM_001145862;NM_001145862;NM_181873	hyperM.iPSC
1	148496067	148496857	3	cg20791007,cg03969696,cg05037389	TSS1500,TSS1500,1stExon;5'UTR	_,_	CA14,CA14,CA14;CA14	NM_012113,NM_012113,NM_012113;NM_012113	hypoM.iPSC
1	148520466	148522127	12	cg15642292,cg07702853,cg21831898,cg11207983,cg07916884,cg06982544,cg21715963,cg10055771,cg01464052,cg00764612,cg09563216,cg03960066	TSS1500,TSS1500,TSS1500,TSS1500,TSS1500,TSS1500,TSS1500,TSS1500,TSS200,TSS200,1stExon;5'UTR,1stExon;5'UTR	N_Shore,N_Shore,Island,Island,Island,Island,S_Shore,S_Shore,S_Shore,S_Shore,S_Shore,S_Shore	C1orf51,C1orf51,C1orf51,C1orf51,C1orf51,C1orf51,C1orf51,C1orf51,C1orf51,C1orf51,C1orf51;C1orf51,C1orf51;C1orf51	NM_144697,NM_144697,NM_144697,NM_144697,NM_144697,NM_144697,NM_144697,NM_144697,NM_144697,NM_144697,NM_144697;NM_144697,NM_144697;NM_144697	hyperM.iPSC
1	148747158	148747480	3	cg03818307,cg01076495,cg16386293	1stExon;1stExon;5'UTR;5'UTR,1stExon;1stExon;5'UTR;5'UTR,Body;Body	_,_	ECM1;ECM1;ECM1;ECM1,ECM1;ECM1;ECM1;ECM1,ECM1;ECM1	NM_004425;NM_022664;NM_004425;NM_022664,NM_004425;NM_022664;NM_004425;NM_022664,NM_004425;NM_022664	hyperM.iPSC
1	148755068	148755429	2	cg00502963,cg03851496	_,_	S_Shore,S_Shore	_,_	_,_	hyperM.iPSC
1	148787825	148787865	2	cg04863713,cg09229181	TSS1500;TSS1500,TSS1500;TSS1500	N_Shore,N_Shore	ADAMTSL4;ADAMTSL4,ADAMTSL4;ADAMTSL4	NM_019032;NM_025008,NM_019032;NM_025008	hyperM.iPSC
1	148788890	148789855	3	cg12974394,cg14037218,cg24441324	5'UTR;5'UTR,5'UTR;5'UTR,5'UTR;5'UTR	Island,Island,S_Shore	ADAMTSL4;ADAMTSL4,ADAMTSL4;ADAMTSL4,ADAMTSL4;ADAMTSL4	NM_019032;NM_025008,NM_019032;NM_025008,NM_019032;NM_025008	hyperM.iPSC
1	148936305	148936383	2	cg12401651,cg15700487	TSS200,TSS200	_,_	GOLPH3L,GOLPH3L	NM_018178,NM_018178	hypoM.iPSC
1	149004386	149004797	2	cg18892169,cg08578023	5'UTR,5'UTR;1stExon	_,_	CTSS,CTSS;CTSS	NM_004079,NM_004079;NM_004079	hyperM.iPSC
1	149047308	149047342	2	cg20802392,cg20817941	5'UTR,1stExon;5'UTR	_,_	CTSK,CTSK;CTSK	NM_000396,NM_000396;NM_000396	hyperM.iPSC
1	149048425	149048927	2	cg26574794,cg13201342	TSS1500,3'UTR;3'UTR;3'UTR;TSS1500	_,_	CTSK,ARNT;ARNT;ARNT;CTSK	NM_000396,NM_178427;NM_178426;NM_001668;NM_000396	hyperM.iPSC
1	149212485	149212647	2	cg07422880,cg26058502	5'UTR;5'UTR,5'UTR;5'UTR	N_Shore,N_Shore	LASS2;LASS2,LASS2;LASS2	NM_022075;NM_181746,NM_022075;NM_181746	hyperM.iPSC
1	149214456	149214648	4	cg13899718,cg18611122,cg22012583,cg13073141	TSS1500;TSS1500,TSS1500;TSS1500,TSS1500;TSS1500,TSS1500;TSS1500	Island,Island,Island,S_Shore	LASS2;LASS2,LASS2;LASS2,LASS2;LASS2,LASS2;LASS2	NM_181746;NM_022075,NM_181746;NM_022075,NM_181746;NM_022075,NM_181746;NM_022075	hypoM.iPSC
1	149220304	149220567	3	cg25468058,cg04144222,cg07337598	TSS1500,TSS1500,TSS1500	_,_	ANXA9,ANXA9,ANXA9	NM_003568,NM_003568,NM_003568	hypoM.iPSC
1	149245009	149245716	3	cg18182216,cg07495664,cg06433658	5'UTR;5'UTR;Body;5'UTR;5'UTR,5'UTR;1stExon;5'UTR;5'UTR;5'UTR;5'UTR;1stExon;1stExon,5'UTR;1stExon;5'UTR;5'UTR;5'UTR;5'UTR;1stExon;1stExon	N_Shelf,N_Shore,N_Shore	FAM63A;FAM63A;FAM63A;FAM63A;FAM63A,FAM63A;FAM63A;FAM63A;FAM63A;FAM63A;FAM63A;FAM63A;FAM63A,FAM63A;FAM63A;FAM63A;FAM63A;FAM63A;FAM63A;FAM63A;FAM63A	NM_018379;NM_001163259;NM_001163258;NM_001163260;NM_001040217,NM_001040217;NM_001163260;NM_018379;NM_001163260;NM_001163259;NM_001163258;NM_001040217;NM_001163259,NM_001040217;NM_001163260;NM_018379;NM_001163260;NM_001163259;NM_001163258;NM_001040217;NM_001163259	hyperM.iPSC
1	149247008	149247035	2	cg21147147,cg09028383	5'UTR;TSS1500;5'UTR;TSS1500;TSS1500;TSS1500,5'UTR;TSS1500;5'UTR;TSS1500;TSS1500;TSS1500	N_Shore,N_Shore	FAM63A;PRUNE;FAM63A;FAM63A;FAM63A;FAM63A,FAM63A;PRUNE;FAM63A;FAM63A;FAM63A;FAM63A	NM_018379;NM_021222;NM_001163258;NM_001040217;NM_001163260;NM_001163259,NM_018379;NM_021222;NM_001163258;NM_001040217;NM_001163260;NM_001163259	hyperM.iPSC
1	149309367	149309447	2	cg14860219,cg13232357	TSS1500,TSS1500	N_Shore,N_Shore	GABPB2,GABPB2	NM_144618,NM_144618	hyperM.iPSC
1	149403898	149404300	3	cg24262376,cg11205312,cg06902698	TSS1500;Body;Body,TSS1500;Body;1stExon,TSS1500;Body;1stExon	_,_	SCNM1;LYSMD1;LYSMD1,SCNM1;LYSMD1;LYSMD1,SCNM1;LYSMD1;LYSMD1	NM_024041;NM_212551;NM_001136543,NM_024041;NM_001136543;NM_212551,NM_024041;NM_001136543;NM_212551	hyperM.iPSC
1	149415120	149415313	2	cg05163509,cg10973881	5'UTR;1stExon,TSS200	_,_	TMOD4;TMOD4,TMOD4	NM_013353;NM_013353,NM_013353	hyperM.iPSC
1	149493559	149493565	2	cg10963543,cg08236358	TSS1500,TSS1500	_,_	PSMD4,PSMD4	NM_002810,NM_002810	hyperM.iPSC
1	149565323	149565578	2	cg08456334,cg01974375	1stExon;5'UTR,TSS1500	N_Shore,N_Shore	PI4KB;PI4KB,PI4KB	NM_002651;NM_002651,NM_002651	hyperM.iPSC
1	149567347	149567492	2	cg02145668,cg27529647	_,_	Island,S_Shore	_,_	_,_	hyperM.iPSC
1	149776347	149776449	2	cg25198049,cg07596668	Body,3'UTR	N_Shelf,N_Shelf	CGN,CGN	NM_020770,NM_020770	hyperM.iPSC
1	149779216	149780126	3	cg12899421,cg20294789,cg27577972	TSS200;TSS200,Body;Body,Body;Body	N_Shore,S_Shore,S_Shore	TUFT1;TUFT1,TUFT1;TUFT1,TUFT1;TUFT1	NM_020127;NM_001126337,NM_001126337;NM_020127,NM_001126337;NM_020127	hypoM.iPSC
1	149959823	149960127	4	cg09820519,cg24158160,cg16096311,cg02959609	TSS1500,TSS1500,TSS1500,TSS1500	N_Shore,N_Shore,N_Shore,N_Shore	C1orf230,C1orf230,C1orf230,C1orf230	NM_001144956,NM_001144956,NM_001144956,NM_001144956	hyperM.iPSC
1	150044398	150045526	4	cg13201297,cg13563504,cg24545100,cg11803184	1stExon;5'UTR,TSS1500,TSS1500;3'UTR;3'UTR,TSS1500;3'UTR;3'UTR	_,_	LINGO4;LINGO4,LINGO4,LINGO4;RORC;RORC,LINGO4;RORC;RORC	NM_001004432;NM_001004432,NM_001004432,NM_001004432;NM_001001523;NM_005060,NM_001004432;NM_001001523;NM_005060	hyperM.iPSC
1	150065056	150065448	2	cg23114183,cg09171692	Body;1stExon;5'UTR,TSS1500;Body	_,_	RORC;RORC;RORC,RORC;RORC	NM_005060;NM_001001523;NM_001001523,NM_001001523;NM_005060	hyperM.iPSC
1	150091812	150092829	4	cg21211478,cg01062247,cg11344950,cg26292918	Body,1stExon,1stExon;5'UTR,TSS200	_,_	THEM5,THEM5,THEM5;THEM5,THEM5	NM_182578,NM_182578,NM_182578;NM_182578,NM_182578	hyperM.iPSC
1	150234073	150234616	2	cg06698332,cg20994097	TSS1500,TSS1500	S_Shore,S_Shore	S100A10,S100A10	NM_002966,NM_002966	hyperM.iPSC
1	150353247	150353891	3	cg20592707,cg02211983,cg22603037	TSS200,TSS1500,TSS1500	S_Shore,S_Shore,S_Shelf	TCHH,TCHH,TCHH	NM_007113,NM_007113,NM_007113	hyperM.iPSC
1	150427861	150428649	5	cg15025200,cg23107878,cg26320663,cg02754945,cg21280320	_,_	N_Shore,Island,Island,Island,S_Shore	_,_	_,_	hyperM.iPSC
1	150749823	150751010	3	cg05248781,cg01868128,cg00011513	TSS200,5'UTR,3'UTR	_,N_Shelf	LCE5A,LCE5A,LCE5A	NM_178438,NM_178438,NM_178438	hyperM.iPSC
1	150753101	150754992	10	cg22358102,cg12588301,cg15700437,cg03606772,cg00302521,cg23726537,cg09873164,cg03352287,cg01864564,cg22723818	TSS1500,5'UTR,5'UTR,5'UTR,Body,Body,Body,3'UTR,3'UTR,3'UTR	N_Shore,N_Shore,N_Shore,N_Shore,N_Shore,Island,Island,Island,Island,S_Shore	CRCT1,CRCT1,CRCT1,CRCT1,CRCT1,CRCT1,CRCT1,CRCT1,CRCT1,CRCT1	NM_019060,NM_019060,NM_019060,NM_019060,NM_019060,NM_019060,NM_019060,NM_019060,NM_019060,NM_019060	hyperM.iPSC
1	150805004	150805512	4	cg23724738,cg07476201,cg24000437,cg23110514	3'UTR,Body,5'UTR,5'UTR	_,_	LCE3E,LCE3E,LCE3E,LCE3E	NM_178435,NM_178435,NM_178435,NM_178435	hyperM.iPSC
1	150819720	150819868	2	cg02054568,cg18116418	TSS200,TSS1500	_,_	LCE3D,LCE3D	NM_032563,NM_032563	hyperM.iPSC
1	150861946	150863037	6	cg26135325,cg27206522,cg26466858,cg13071333,cg09895009,cg16046605	1stExon,TSS200,TSS1500,TSS1500,TSS1500,TSS1500	_,_	LCE3A,LCE3A,LCE3A,LCE3A,LCE3A,LCE3A	NM_178431,NM_178431,NM_178431,NM_178431,NM_178431,NM_178431	hyperM.iPSC
1	150924574	150924911	2	cg08279693,cg24332770	TSS1500,TSS1500	_,_	LCE2B,LCE2B	NM_014357,NM_014357	hyperM.iPSC
1	150936609	150938331	5	cg22616525,cg13974761,cg13705774,cg13697387,cg16354520	TSS1500,TSS1500,TSS200,1stExon;5'UTR,3'UTR	_,_	LCE2A,LCE2A,LCE2A,LCE2A;LCE2A,LCE2A	NM_178428,NM_178428,NM_178428,NM_178428;NM_178428,NM_178428	hyperM.iPSC
1	150947263	150948603	4	cg20823091,cg21846488,cg00981443,cg17542385	TSS1500,TSS1500,TSS1500,_	_,_	LCE4A,LCE4A,LCE4A,_	NM_178356,NM_178356,NM_178356,_	hyperM.iPSC
1	150957749	150958382	2	cg13927088,cg26420391	TSS1500,TSS1500	_,_	C1orf68,C1orf68	NM_001024679,NM_001024679	hyperM.iPSC
1	150996855	150998214	3	cg11950860,cg26939283,cg25104107	TSS1500,5'UTR,5'UTR	N_Shelf,N_Shore,N_Shore	KPRP,KPRP,KPRP	NM_001025231,NM_001025231,NM_001025231	hyperM.iPSC
1	151014096	151014186	3	cg23413307,cg26302157,cg13493250	TSS1500,TSS1500,TSS1500	_,_	LCE1F,LCE1F,LCE1F	NM_178354,NM_178354,NM_178354	hyperM.iPSC
1	151025256	151025379	2	cg14792160,cg21065959	TSS200,1stExon;5'UTR	_,_	LCE1E,LCE1E;LCE1E	NM_178353,NM_178353;NM_178353	hyperM.iPSC
1	151034891	151035351	3	cg01406203,cg22365757,cg12725323	TSS1500,TSS1500,TSS1500	_,_	LCE1D,LCE1D,LCE1D	NM_178352,NM_178352,NM_178352	hyperM.iPSC
1	151050113	151050929	3	cg19250709,cg08878744,cg03881934	TSS1500,TSS1500,TSS200	_,_	LCE1B,LCE1B,LCE1B	NM_178349,NM_178349,NM_178349	hyperM.iPSC
1	151066566	151066792	2	cg07330196,cg14696820	TSS200,1stExon	_,_	LCE1A,LCE1A	NM_178348,NM_178348	hyperM.iPSC
1	151080474	151082792	5	cg22124859,cg09417355,cg26531371,cg13366738,cg23624133	TSS1500,TSS1500,TSS1500,5'UTR,Body	_,_	LCE6A,LCE6A,LCE6A,LCE6A,LCE6A	NM_001128600,NM_001128600,NM_001128600,NM_001128600,NM_001128600	hyperM.iPSC
1	151116362	151116407	2	cg21948655,cg09552123	TSS1500,TSS1500	_,_	SMCP,SMCP	NM_030663,NM_030663	hyperM.iPSC
1	151147743	151149044	3	cg05440289,cg15486123,cg02855850	5'UTR,5'UTR,Body	_,_	IVL,IVL,IVL	NM_005547,NM_005547,NM_005547	hyperM.iPSC
1	151208351	151209834	3	cg02060465,cg11066776,cg08763351	TSS1500,TSS1500,5'UTR	_,_	SPRR4,SPRR4,SPRR4	NM_173080,NM_173080,NM_173080	hyperM.iPSC
1	151222167	151224003	5	cg06101324,cg04505023,cg04546999,cg27569034,cg07909128	TSS1500,TSS1500,TSS200,5'UTR,5'UTR	_,_	SPRR1A,SPRR1A,SPRR1A,SPRR1A,SPRR1A	NM_005987,NM_005987,NM_005987,NM_005987,NM_005987	hyperM.iPSC
1	151240344	151241395	4	cg24667326,cg04138756,cg13444842,cg21543102	TSS1500;TSS1500,TSS1500;TSS1500,5'UTR;5'UTR,5'UTR;5'UTR	_,_	SPRR3;SPRR3,SPRR3;SPRR3,SPRR3;SPRR3,SPRR3;SPRR3	NM_001097589;NM_005416,NM_001097589;NM_005416,NM_001097589;NM_005416,NM_001097589;NM_005416	hyperM.iPSC
1	151280197	151281905	4	cg01011918,cg14826683,cg10812889,cg12891678	1stExon;5'UTR,TSS1500,TSS1500,_	_,_	SPRR2D;SPRR2D,SPRR2D,SPRR2D,_	NM_006945;NM_006945,NM_006945,NM_006945,_	hyperM.iPSC
1	151297138	151297375	4	cg04993112,cg22014834,cg09169531,cg26059632	TSS1500,TSS1500,TSS1500,TSS1500	_,_	SPRR2A,SPRR2A,SPRR2A,SPRR2A	NM_005988,NM_005988,NM_005988,NM_005988	hyperM.iPSC
1	151310695	151311081	2	cg13950674,cg08009265	5'UTR;1stExon,TSS1500	_,_	SPRR2B;SPRR2B,SPRR2B	NM_001017418;NM_001017418,NM_001017418	hyperM.iPSC
1	151352273	151352622	3	cg03449150,cg22946974,cg22204954	5'UTR,5'UTR;1stExon,TSS200	_,_	SPRR2F,SPRR2F;SPRR2F,SPRR2F	NM_001014450,NM_001014450;NM_001014450,NM_001014450	hyperM.iPSC
1	151379440	151381390	5	cg13401840,cg00891995,cg00535683,cg07804289,cg10119001	Body,Body,TSS200,TSS1500,TSS1500	_,_	SPRR2C,SPRR2C,SPRR2C,SPRR2C,SPRR2C	NR_003062,NR_003062,NR_003062,NR_003062,NR_003062	hyperM.iPSC
1	151441872	151444201	6	cg02303399,cg00298977,cg02886578,cg21936464,cg08242576,cg18140889	TSS1500,TSS200,5'UTR,5'UTR,Body,3'UTR	_,_	LELP1,LELP1,LELP1,LELP1,LELP1,LELP1	NM_001010857,NM_001010857,NM_001010857,NM_001010857,NM_001010857,NM_001010857	hyperM.iPSC
1	151549785	151550618	4	cg22702025,cg08244156,cg09448880,cg06275635	5'UTR;1stExon,TSS1500,TSS1500,TSS1500	_,_	PGLYRP3;PGLYRP3,PGLYRP3,PGLYRP3,PGLYRP3	NM_052891;NM_052891,NM_052891,NM_052891,NM_052891	hyperM.iPSC
1	151588635	151589112	2	cg06954535,cg01093088	TSS1500,TSS1500	_,_	PGLYRP4,PGLYRP4	NM_020393,NM_020393	hyperM.iPSC
1	151596696	151597382	3	cg26937038,cg02711163,cg16139316	TSS1500,TSS200,5'UTR	_,_	S100A9,S100A9,S100A9	NM_002965,NM_002965,NM_002965	hyperM.iPSC
1	151614929	151615535	2	cg02901136,cg02813121	TSS1500,TSS1500	_,_	S100A12,S100A12	NM_005621,NM_005621	hyperM.iPSC
1	151629551	151630204	4	cg01431057,cg20256009,cg20335425,cg24898863	Body,5'UTR,5'UTR,TSS200	_,_	S100A8,S100A8,S100A8,S100A8	NM_002964,NM_002964,NM_002964,NM_002964	hyperM.iPSC
1	151654233	151654331	2	cg22933439,cg17496887	TSS1500,TSS1500	_,_	S100A7A,S100A7A	NM_176823,NM_176823	hyperM.iPSC
1	151680265	151680564	3	cg13356175,cg27441409,cg03261155	TSS1500,TSS1500,TSS1500	_,_	S100A7L2,S100A7L2,S100A7L2	NM_001045479,NM_001045479,NM_001045479	hyperM.iPSC
1	151775720	151775908	2	cg10959711,cg24375627	TSS1500,TSS1500	S_Shore,S_Shore	S100A6,S100A6	NM_014624,NM_014624	hyperM.iPSC
1	151780632	151781066	5	cg10582450,cg16269775,cg08127462,cg07044523,cg19808620	5'UTR,1stExon;5'UTR,TSS200,TSS200,TSS1500	_,_	S100A5,S100A5;S100A5,S100A5,S100A5,S100A5	NM_002962,NM_002962;NM_002962,NM_002962,NM_002962,NM_002962	hyperM.iPSC
1	151782126	151782246	3	cg00002646,cg21217846,cg26303281	TSS1500,TSS1500,TSS1500	_,_	S100A5,S100A5,S100A5	NM_002962,NM_002962,NM_002962	hyperM.iPSC
1	151785008	151789177	9	cg24691453,cg13091627,cg07587610,cg07245635,cg00018184,cg09171874,cg15026767,cg09680007,cg06615154	TSS200;TSS200,TSS200;TSS200,TSS1500;TSS1500,TSS1500;TSS1500,3'UTR,Body,TSS200,TSS200,TSS1500	_,_	S100A4;S100A4,S100A4;S100A4,S100A4;S100A4,S100A4;S100A4,S100A3,S100A3,S100A3,S100A3,S100A3	NM_019554;NM_002961,NM_019554;NM_002961,NM_002961;NM_019554,NM_002961;NM_019554,NM_002960,NM_002960,NM_002960,NM_002960,NM_002960	hyperM.iPSC
1	151805388	151806028	2	cg22700686,cg02332117	TSS1500,TSS1500	_,_	S100A2,S100A2	NM_005978,NM_005978	hyperM.iPSC
1	151848118	151848159	2	cg07910075,cg11820824	5'UTR,5'UTR	_,_	S100A16,S100A16	NM_080388,NM_080388	hyperM.iPSC
1	151851544	151852539	2	cg23499956,cg23851011	5'UTR,TSS1500	_,_	S100A16,S100A16	NM_080388,NM_080388	hyperM.iPSC
1	151855406	151855551	2	cg25433648,cg13098855	5'UTR;1stExon,TSS200	_,_	S100A14;S100A14,S100A14	NM_020672;NM_020672,NM_020672	hypoM.iPSC
1	151866103	151866111	2	cg02573566,cg00012362	5'UTR;1stExon;5'UTR;5'UTR;TSS1500;5'UTR;5'UTR,5'UTR;1stExon;5'UTR;5'UTR;TSS1500;5'UTR;5'UTR	_,_	S100A13;S100A13;S100A13;S100A13;S100A1;S100A13;S100A13,S100A13;S100A13;S100A13;S100A13;S100A1;S100A13;S100A13	NM_005979;NM_001024213;NM_001024211;NM_001024213;NM_006271;NM_001024210;NM_001024212,NM_005979;NM_001024213;NM_001024211;NM_001024213;NM_006271;NM_001024210;NM_001024212	hyperM.iPSC
1	151871991	151872802	3	cg06819431,cg26148377,cg26548293	TSS1500;5'UTR,TSS1500;5'UTR,TSS1500;5'UTR	N_Shore,N_Shore,Island	C1orf77;S100A13,C1orf77;S100A13,C1orf77;S100A13	NM_015607;NM_001024210,NM_015607;NM_001024210,NM_015607;NM_001024210	hyperM.iPSC
1	151874241	151874974	3	cg17729941,cg22706106,cg17412043	5'UTR;TSS1500,5'UTR;TSS1500,5'UTR	S_Shore,S_Shore,S_Shore	C1orf77;S100A13,C1orf77;S100A13,C1orf77	NM_015607;NM_001024210,NM_015607;NM_001024210,NM_015607	hyperM.iPSC
1	151897672	151898257	2	cg23283690,cg24315913	TSS200,Body	N_Shore,S_Shore	SNAPIN,SNAPIN	NM_012437,NM_012437	hyperM.iPSC
1	151922676	151922892	2	cg17886303,cg16294045	Body,Body	S_Shelf,S_Shelf	NPR1,NPR1	NM_000906,NM_000906	hyperM.iPSC
1	151937411	151937479	2	cg03423916,cg11815057	_,_	_,_	_,_	_,_	hypoM.iPSC
1	152012835	152014175	3	cg08129092,cg03138446,cg21279955	3'UTR,TSS1500,TSS1500	N_Shore,N_Shore,N_Shore	INTS3,SLC27A3,SLC27A3	NM_023015,NM_024330,NM_024330	hyperM.iPSC
1	152028825	152029188	5	cg26182859,cg09762021,cg12067764,cg13502252,cg13064789	_,_	_,_	_,_	_,_	hyperM.iPSC
1	152066492	152067323	2	ch.1.2975077F,cg01402255	Body,Body	_,_	GATAD2B,GATAD2B	NM_020699,NM_020699	hyperM.iPSC
1	152185998	152186971	3	cg17826986,cg04722756,cg15831722	TSS1500,TSS1500,TSS1500;3'UTR	S_Shore,S_Shore,S_Shore	DENND4B,DENND4B,DENND4B;CRTC2	NM_014856,NM_014856,NM_014856;NM_181715	hyperM.iPSC
1	152198190	152198746	2	cg04108615,cg16262392	TSS1500,3'UTR;TSS1500	S_Shore,S_Shore	CRTC2,SLC39A1;CRTC2	NM_181715,NM_014437;NM_181715	hyperM.iPSC
1	152217467	152217491	2	cg03655142,cg01588224	TSS1500,TSS1500	S_Shore,S_Shore	JTB,JTB	NM_006694,NM_006694	hyperM.iPSC
1	152394253	152394665	4	cg17383186,cg16274678,cg11718162,cg19757176	TSS200;TSS200,3'UTR;3'UTR;TSS1500;3'UTR;3'UTR;TSS1500,3'UTR;3'UTR;TSS1500;3'UTR;3'UTR;TSS1500,3'UTR;3'UTR;TSS1500;3'UTR;3'UTR;TSS1500	_,_	NUP210L;NUP210L,TPM3;TPM3;NUP210L;TPM3;TPM3;NUP210L,TPM3;TPM3;NUP210L;TPM3;TPM3;NUP210L,TPM3;TPM3;NUP210L;TPM3;TPM3;NUP210L	NM_001159484;NM_207308,NM_001043353;NM_153649;NM_001159484;NM_001043351;NM_001043352;NM_207308,NM_001043353;NM_153649;NM_001159484;NM_001043351;NM_001043352;NM_207308,NM_001043353;NM_153649;NM_001159484;NM_001043351;NM_001043352;NM_207308	hyperM.iPSC
1	152430678	152434061	9	cg24490338,cg13740187,cg12205230,cg03830929,cg27313201,cg21536086,cg12640942,cg24880818,cg18645493	Body,TSS200,TSS1500,TSS1500,TSS1500,TSS1500,TSS1500,TSS1500,TSS1500	_,_	TPM3,TPM3,TPM3,TPM3,TPM3,MIR190B,MIR190B,MIR190B,MIR190B	NM_152263,NM_152263,NM_152263,NM_152263,NM_152263,NR_030600,NR_030600,NR_030600,NR_030600	hyperM.iPSC
1	152446480	152446620	3	cg14520957,cg04934776,cg02896768	TSS1500;3'UTR;3'UTR;3'UTR,TSS1500;3'UTR;3'UTR;3'UTR,TSS1500;Body;Body;Body	_,_	C1orf189;C1orf43;C1orf43;C1orf43,C1orf189;C1orf43;C1orf43;C1orf43,C1orf189;C1orf43;C1orf43;C1orf43	NM_001010979;NM_001098616;NM_138740;NM_015449,NM_001010979;NM_001098616;NM_138740;NM_015449,NM_001010979;NM_138740;NM_015449;NM_001098616	hyperM.iPSC
1	152458829	152458994	3	cg26808167,cg14415083,cg18262993	TSS1500;TSS1500;Body;Body;Body,TSS1500;TSS1500;Body;Body;Body,TSS1500;TSS1500;Body;Body;Body	N_Shore,N_Shore,N_Shore	UBAP2L;UBAP2L;C1orf43;C1orf43;C1orf43,UBAP2L;UBAP2L;C1orf43;C1orf43;C1orf43,UBAP2L;UBAP2L;C1orf43;C1orf43;C1orf43	NM_014847;NM_001127320;NM_138740;NM_015449;NM_001098616,NM_014847;NM_001127320;NM_138740;NM_015449;NM_001098616,NM_014847;NM_001127320;NM_138740;NM_015449;NM_001098616	hyperM.iPSC
1	152560106	152560275	3	cg20713492,cg06181069,cg01359534	TSS200,TSS200,1stExon	_,_	AQP10,AQP10,AQP10	NM_080429,NM_080429,NM_080429	hyperM.iPSC
1	152565803	152566741	2	cg06811467,cg19760410	TSS1500;5'UTR,TSS200;5'UTR	N_Shore,N_Shore	ATP8B2;ATP8B2,ATP8B2;ATP8B2	NM_020452;NM_001005855,NM_020452;NM_001005855	hyperM.iPSC
1	152568092	152568588	2	cg20934881,cg24671951	Body;Body,Body;Body	Island,S_Shore	ATP8B2;ATP8B2,ATP8B2;ATP8B2	NM_020452;NM_001005855,NM_020452;NM_001005855	hyperM.iPSC
1	152643988	152645068	5	cg24346686,cg07318287,cg11078914,cg25853020,cg07721365	TSS1500;TSS1500,TSS1500;TSS1500,TSS200;TSS200,TSS200;TSS200,Body;Body	N_Shore,N_Shore,N_Shore,N_Shore,Island	IL6R;IL6R,IL6R;IL6R,IL6R;IL6R,IL6R;IL6R,IL6R;IL6R	NM_000565;NM_181359,NM_000565;NM_181359,NM_000565;NM_181359,NM_000565;NM_181359,NM_181359;NM_000565	hyperM.iPSC
1	152741797	152742312	2	cg18081940,cg24889998	5'UTR;1stExon;1stExon;5'UTR;TSS1500,5'UTR;5'UTR;TSS1500	Island,Island	TDRD10;TDRD10;TDRD10;TDRD10;SHE,TDRD10;TDRD10;SHE	NM_182499;NM_001098475;NM_182499;NM_001098475;NM_001010846,NM_182499;NM_001098475;NM_001010846	hyperM.iPSC
1	152795032	152796560	4	cg26690414,cg08031413,cg22128197,cg20324858	Body,Body,Body,Body	N_Shelf,N_Shore,N_Shore,N_Shore	UBE2Q1,UBE2Q1,UBE2Q1,UBE2Q1	NM_017582,NM_017582,NM_017582,NM_017582	hyperM.iPSC
1	152805848	152806698	3	cg13424529,cg18288119,cg05746024	TSS1500,TSS1500,TSS200	N_Shore,N_Shore,N_Shore	CHRNB2,CHRNB2,CHRNB2	NM_000748,NM_000748,NM_000748	hyperM.iPSC
1	152867306	152867412	3	cg25012577,cg06315974,cg12033781	TSS1500,TSS1500,TSS1500	S_Shore,S_Shore,S_Shore	ADAR,ADAR,ADAR	NM_001025107,NM_001025107,NM_001025107	hyperM.iPSC
1	152999617	153000116	2	cg24675344,cg18755616	Body;Body,Body;Body	Island,S_Shore	KCNN3;KCNN3,KCNN3;KCNN3	NM_002249;NM_170782,NM_002249;NM_170782	hypoM.iPSC
1	153011382	153011748	2	cg17157436,cg22732644	Body;Body,Body;Body	Island,S_Shore	KCNN3;KCNN3,KCNN3;KCNN3	NM_002249;NM_170782,NM_002249;NM_170782	hyperM.iPSC
1	153099741	153099745	2	cg18315680,cg10503610	Body;TSS1500,Body;TSS1500	_,_	KCNN3;KCNN3,KCNN3;KCNN3	NM_002249;NM_170782,NM_002249;NM_170782	hyperM.iPSC
1	153195941	153196856	5	cg02069772,cg17747879,cg23216745,cg11135108,cg09819759	TSS1500,TSS1500;3'UTR,TSS1500;3'UTR,TSS1500;3'UTR,3'UTR	_,N_Shelf	PBXIP1,PBXIP1;PYGO2,PBXIP1;PYGO2,PBXIP1;PYGO2,PYGO2	NM_020524,NM_020524;NM_138300,NM_020524;NM_138300,NM_020524;NM_138300,NM_138300	hyperM.iPSC
1	153232043	153232692	2	cg09937642,cg23154272	Body;TSS1500;Body,1stExon;5'UTR	_,_	FLAD1;LENEP;FLAD1,LENEP;LENEP	NM_201398;NM_018655;NM_025207,NM_018655;NM_018655	hyperM.iPSC
1	153237733	153238126	2	cg16986748,cg15575498	_,_	N_Shore,N_Shore	_,_	_,_	hyperM.iPSC
1	153272089	153273947	8	cg13205050,cg17896897,cg25412453,cg10813183,cg19304100,cg08472142,cg21596858,cg24348479	TSS1500;TSS1500;Body,TSS1500;TSS1500;1stExon,TSS200;5'UTR;1stExon;TSS200,1stExon;5'UTR;5'UTR;1stExon;TSS200,5'UTR;5'UTR;TSS200,Body;TSS1500;Body,Body;TSS1500;Body,Body;TSS1500;Body	_,_	DCST1;DCST1;DCST2,DCST1;DCST1;DCST2,DCST1;DCST2;DCST2;DCST1,DCST1;DCST1;DCST1;DCST1;DCST2,DCST1;DCST1;DCST2,DCST1;DCST2;DCST1,DCST1;DCST2;DCST1,DCST1;DCST2;DCST1	NM_152494;NM_001143687;NM_144622,NM_152494;NM_001143687;NM_144622,NM_152494;NM_144622;NM_144622;NM_001143687,NM_152494;NM_001143687;NM_152494;NM_001143687;NM_144622,NM_001143687;NM_152494;NM_144622,NM_001143687;NM_144622;NM_152494,NM_001143687;NM_144622;NM_152494,NM_001143687;NM_144622;NM_152494	hyperM.iPSC
1	153290905	153291018	2	cg03379131,cg12719510	Body;Body;Body;Body;Body;Body,Body;Body;Body;Body;Body;Body	Island,S_Shore	ADAM15;ADAM15;ADAM15;ADAM15;ADAM15;ADAM15,ADAM15;ADAM15;ADAM15;ADAM15;ADAM15;ADAM15	NM_207194;NM_207196;NM_207197;NM_003815;NM_207195;NM_207191,NM_207194;NM_207196;NM_207197;NM_003815;NM_207195;NM_207191	hyperM.iPSC
1	153310933	153310969	3	cg22678754,cg27166581,cg08947894	_,_	S_Shore,S_Shore,S_Shore	_,_	_,_	hypoM.iPSC
1	153320447	153320475	2	cg00449821,cg00267713	Body,Body	Island,Island	EFNA3,EFNA3	NM_004952,NM_004952	hyperM.iPSC
1	153369846	153370193	2	cg06639488,cg14612733	Body;Body,Body;Body	S_Shelf,S_Shelf	EFNA1;EFNA1,EFNA1;EFNA1	NM_182685;NM_004428,NM_182685;NM_004428	hyperM.iPSC
1	153429376	153429495	3	cg22500132,cg22531371,cg02386822	TSS200;TSS200;TSS200;TSS200;TSS200;TSS200;TSS200,TSS200;TSS200;TSS200;TSS200;TSS200;TSS200;TSS200,TSS200;TSS200;TSS200;TSS200;TSS200;TSS200;TSS200	N_Shore,N_Shore,N_Shore	MUC1;MUC1;MUC1;MUC1;MUC1;MUC1;MUC1,MUC1;MUC1;MUC1;MUC1;MUC1;MUC1;MUC1,MUC1;MUC1;MUC1;MUC1;MUC1;MUC1;MUC1	NM_001018016;NM_001044391;NM_001044393;NM_001044392;NM_001044390;NM_002456;NM_001018017,NM_001018016;NM_001044391;NM_001044393;NM_001044392;NM_001044390;NM_002456;NM_001018017,NM_001018016;NM_001044391;NM_001044393;NM_001044392;NM_001044390;NM_002456;NM_001018017	hypoM.iPSC
1	153455528	153455677	2	cg14665690,cg12218542	Body,Body	_,_	GBAP1,GBAP1	NR_002188,NR_002188	hyperM.iPSC
1	153478086	153478360	2	cg11399409,cg19257864	5'UTR;TSS1500;5'UTR;5'UTR;5'UTR,5'UTR;TSS1500;5'UTR;5'UTR;5'UTR	_,_	GBA;GBA;GBA;GBA;GBA,GBA;GBA;GBA;GBA;GBA	NM_001005742;NM_000157;NM_001005750;NM_001005741;NM_001005749,NM_001005742;NM_000157;NM_001005750;NM_001005741;NM_001005749	hyperM.iPSC
1	153492388	153492432	2	cg18568145,cg07189204	TSS1500;TSS1500,3'UTR;TSS1500;TSS1500;3'UTR	S_Shore,S_Shore	FAM189B;FAM189B,SCAMP3;FAM189B;FAM189B;SCAMP3	NM_198264;NM_006589,NM_052837;NM_198264;NM_006589;NM_005698	hyperM.iPSC
1	153499003	153499649	4	cg01745448,cg13410390,cg17854654,cg06444207	TSS200;TSS200,TSS1500;3'UTR;TSS1500,TSS1500;3'UTR;TSS1500,TSS1500;Body;TSS1500	S_Shore,S_Shore,S_Shore,S_Shore	SCAMP3;SCAMP3,SCAMP3;CLK2;SCAMP3,SCAMP3;CLK2;SCAMP3,SCAMP3;CLK2;SCAMP3	NM_005698;NM_052837,NM_005698;NM_003993;NM_052837,NM_005698;NM_003993;NM_052837,NM_005698;NM_003993;NM_052837	hyperM.iPSC
1	153531650	153532002	3	cg11736940,cg25651783,cg09037777	Body;Body,Body;Body,Body;Body	Island,Island,Island	PKLR;PKLR,PKLR;PKLR,PKLR;PKLR	NM_000298;NM_181871,NM_000298;NM_181871,NM_000298;NM_181871	hypoM.iPSC
1	153537490	153538386	5	cg15708776,cg23993235,cg13497187,cg00764632,cg15490880	TSS200;Body,TSS200;Body,TSS1500;1stExon,TSS1500;1stExon;5'UTR,TSS1500;TSS1500	_,_	PKLR;PKLR,PKLR;PKLR,PKLR;PKLR,PKLR;PKLR;PKLR,PKLR;PKLR	NM_181871;NM_000298,NM_181871;NM_000298,NM_181871;NM_000298,NM_181871;NM_000298;NM_000298,NM_181871;NM_000298	hyperM.iPSC
1	153556860	153557921	4	cg24547565,cg15113766,cg15676040,cg22234962	TSS1500;Body;Body;TSS1500;Body,TSS1500;3'UTR;3'UTR;3'UTR;TSS1500;3'UTR,TSS200;3'UTR;3'UTR;3'UTR;TSS200;3'UTR,5'UTR;5'UTR;5'UTR	N_Shore,N_Shore,N_Shore,N_Shore	RUSC1;FDPS;FDPS;RUSC1;FDPS,RUSC1;C1orf104;FDPS;FDPS;RUSC1;FDPS,RUSC1;C1orf104;FDPS;FDPS;RUSC1;FDPS,RUSC1;RUSC1;C1orf104	NM_001105204;NM_001135822;NM_001135821;NM_001105203;NM_002004,NM_001105204;NM_001039517;NM_002004;NM_001135822;NM_001105203;NM_001135821,NM_001105203;NM_001039517;NM_002004;NM_001135822;NM_001105204;NM_001135821,NM_001105203;NM_001105204;NM_001039517	hyperM.iPSC
1	154095550	154096173	2	cg06440960,cg25446086	TSS1500,1stExon;5'UTR	N_Shore,N_Shore	SYT11,SYT11;SYT11	NM_152280,NM_152280;NM_152280	hyperM.iPSC
1	154198253	154198482	3	cg20847292,cg13921921,cg14204586	Body;Body;Body,Body;Body;Body,Body;Body;Body	_,_	ARHGEF2;ARHGEF2;ARHGEF2,ARHGEF2;ARHGEF2;ARHGEF2,ARHGEF2;ARHGEF2;ARHGEF2	NM_004723;NM_001162383;NM_001162384,NM_004723;NM_001162383;NM_001162384,NM_004723;NM_001162383;NM_001162384	hyperM.iPSC
1	154297468	154297806	2	cg09243900,cg19580810	TSS200,1stExon;5'UTR	_,_	RAB25,RAB25;RAB25	NM_020387,NM_020387;NM_020387	hypoM.iPSC
1	154448860	154448870	2	cg11075509,cg24008892	TSS1500;3'UTR,TSS1500;3'UTR	N_Shore,N_Shore	PMF1;SLC25A44,PMF1;SLC25A44	NM_007221;NM_014655,NM_007221;NM_014655	hyperM.iPSC
1	154478033	154478520	10	cg14663278,cg11580676,cg24843609,cg17419597,cg13282594,cg11519176,cg23729443,cg09996284,cg24670453,cg12036877	TSS1500,TSS1500,TSS1500,TSS1500,TSS1500,TSS200,TSS200,TSS200,TSS200,TSS200	N_Shelf,N_Shelf,N_Shelf,N_Shelf,N_Shelf,N_Shelf,N_Shelf,N_Shelf,N_Shelf,N_Shelf	BGLAP,BGLAP,BGLAP,BGLAP,BGLAP,BGLAP,BGLAP,BGLAP,BGLAP,BGLAP	NM_199173,NM_199173,NM_199173,NM_199173,NM_199173,NM_199173,NM_199173,NM_199173,NM_199173,NM_199173	hyperM.iPSC
1	154483802	154484718	6	cg00105102,cg06882877,cg10046892,cg26541780,cg01583940,cg12303685	5'UTR;5'UTR,5'UTR;TSS200;1stExon,TSS200;TSS200,TSS200;TSS200,TSS1500;TSS200,TSS1500;TSS1500	S_Shore,S_Shore,S_Shelf,S_Shelf,S_Shelf,S_Shelf	PAQR6;PAQR6,PAQR6;PAQR6;PAQR6,PAQR6;PAQR6,PAQR6;PAQR6,PAQR6;PAQR6,PAQR6;PAQR6	NM_024897;NM_198406,NM_024897;NM_198406;NM_024897,NM_198406;NM_024897,NM_198406;NM_024897,NM_198406;NM_024897,NM_198406;NM_024897	hyperM.iPSC
1	154517904	154518080	2	cg18973101,cg14500718	TSS1500;Body,TSS1500;Body	_,_	TMEM79;SMG5,TMEM79;SMG5	NR_026678;NM_015327,NR_026678;NM_015327	hyperM.iPSC
1	154519697	154519776	2	cg00500989,cg24685761	TSS1500;Body;TSS1500,TSS1500;Body;TSS1500	_,_	SMG5;TMEM79;TMEM79,SMG5;TMEM79;TMEM79	NM_015327;NR_026678;NM_032323,NM_015327;NR_026678;NM_032323	hyperM.iPSC
1	154573942	154573972	2	cg10585648,cg18993334	Body;5'UTR;1stExon;Body;Body,Body;5'UTR;Body;Body	N_Shore,N_Shore	CCT3;C1orf182;C1orf182;CCT3;CCT3,CCT3;C1orf182;CCT3;CCT3	NM_001008800;NM_144627;NM_144627;NM_001008883;NM_005998,NM_001008800;NM_144627;NM_001008883;NM_005998	hyperM.iPSC
1	154575352	154575882	2	cg26334428,cg05532239	TSS1500;5'UTR;TSS1500;TSS1500,TSS1500;5'UTR;TSS1500;TSS1500	S_Shore,S_Shore	CCT3;C1orf182;CCT3;CCT3,CCT3;C1orf182;CCT3;CCT3	NM_001008800;NM_144627;NM_001008883;NM_005998,NM_001008800;NM_144627;NM_001008883;NM_005998	hyperM.iPSC
1	154644286	154645026	3	cg26681458,cg13056505,cg14219449	Body,Body,Body	_,_	C1orf61,C1orf61,C1orf61	NM_006365,NM_006365,NM_006365	hyperM.iPSC
1	154728174	154729248	3	cg21877565,cg26885488,cg25271672	5'UTR,5'UTR,5'UTR	_,_	MEF2D,MEF2D,MEF2D	NM_005920,NM_005920,NM_005920	hyperM.iPSC
1	154732712	154733812	3	cg17479280,cg17787876,cg08123045	5'UTR,5'UTR,5'UTR	N_Shelf,N_Shelf,N_Shelf	MEF2D,MEF2D,MEF2D	NM_005920,NM_005920,NM_005920	hyperM.iPSC
1	154743891	154744459	2	cg10595031,cg15150034	_,_	S_Shore,S_Shelf	_,_	_,_	hyperM.iPSC
1	154809104	154809462	3	cg12124478,cg07956012,cg11716578	TSS200,TSS1500,TSS1500	Island,S_Shore,S_Shore	IQGAP3,IQGAP3,IQGAP3	NM_178229,NM_178229,NM_178229	hyperM.iPSC
1	154816002	154816157	2	cg17478282,cg03760759	TSS200,5'UTR;1stExon	_,_	TTC24,TTC24;TTC24	NM_001105669,NM_001105669;NM_001105669	hyperM.iPSC
1	154838167	154838222	3	cg11192022,cg06957169,cg14611278	TSS1500;TSS1500,TSS1500;TSS1500,TSS1500;TSS1500	_,_	GPATCH4;GPATCH4,GPATCH4;GPATCH4,GPATCH4;GPATCH4	NM_015590;NM_182679,NM_015590;NM_182679,NM_015590;NM_182679	hyperM.iPSC
1	154882586	154883428	5	cg23640929,cg03265671,cg00502190,cg10389771,cg16269733	Body;Body,Body;Body,Body;Body,Body;Body,Body;Body	N_Shore,Island,Island,Island,Island	BCAN;BCAN,BCAN;BCAN,BCAN;BCAN,BCAN;BCAN,BCAN;BCAN	NM_198427;NM_021948,NM_198427;NM_021948,NM_198427;NM_021948,NM_198427;NM_021948,NM_198427;NM_021948	hyperM.iPSC
1	154896036	154897872	5	cg10221746,cg15934095,cg25343618,cg15101245,cg07134230	_,_	S_Shore,S_Shelf,S_Shelf,S_Shelf,S_Shelf	_,_	_,_	hyperM.iPSC
1	154914226	154914974	2	cg04671462,cg21834497	TSS1500,TSS1500	S_Shore,S_Shore	NES,NES	NM_006617,NM_006617	hyperM.iPSC
1	154962520	154964248	5	cg00341602,cg05809481,cg09507184,cg19377421,cg10805956	Body,Body,1stExon;TSS1500;TSS1500,1stExon;TSS1500;TSS1500,1stExon;5'UTR;TSS1500;TSS1500	N_Shelf,N_Shore,N_Shore,N_Shore,N_Shore	ISG20L2,ISG20L2,ISG20L2;C1orf66;C1orf66,ISG20L2;C1orf66;C1orf66,ISG20L2;ISG20L2;C1orf66;C1orf66	NM_030980,NM_030980,NM_030980;NM_015997;NM_001142560,NM_030980;NM_015997;NM_001142560,NM_030980;NM_030980;NM_015997;NM_001142560	hyperM.iPSC
1	154989034	154989300	2	cg06961289,cg19599803	TSS200;TSS1500;TSS1500,TSS1500;TSS1500;TSS1500	S_Shore,S_Shore	HDGF;HDGF;HDGF,HDGF;HDGF;HDGF	NM_001126050;NM_004494;NM_001126051,NM_001126050;NM_004494;NM_001126051	hyperM.iPSC
1	155051493	155051912	2	cg25630380,cg00626119	Body;Body;TSS1500;Body;Body;Body,Body;Body;TSS1500;Body;Body;Body	S_Shore,S_Shore	SH2D2A;SH2D2A;NTRK1;SH2D2A;SH2D2A;SH2D2A,SH2D2A;SH2D2A;NTRK1;SH2D2A;SH2D2A;SH2D2A	NM_001161443;NM_001161442;NM_001007792;NM_003975;NM_001161441;NM_001161444,NM_001161443;NM_001161442;NM_001007792;NM_003975;NM_001161441;NM_001161444	hyperM.iPSC
1	155053225	155053277	3	cg20839149,cg12499211,cg12039611	5'UTR;Body;1stExon;TSS1500;5'UTR;5'UTR;1stExon;1stExon;5'UTR;1stExon,Body;TSS200;TSS200;TSS1500;TSS200;TSS200,Body;TSS200;TSS200;TSS1500;TSS200;TSS200	S_Shelf,S_Shelf,S_Shelf	SH2D2A;NTRK1;SH2D2A;SH2D2A;SH2D2A;SH2D2A;SH2D2A;SH2D2A;SH2D2A;SH2D2A,NTRK1;SH2D2A;SH2D2A;SH2D2A;SH2D2A;SH2D2A,NTRK1;SH2D2A;SH2D2A;SH2D2A;SH2D2A;SH2D2A	NM_001161444;NM_001007792;NM_003975;NM_001161443;NM_003975;NM_001161442;NM_001161442;NM_001161444;NM_001161441;NM_001161441,NM_001007792;NM_003975;NM_001161444;NM_001161443;NM_001161442;NM_001161441,NM_001007792;NM_003975;NM_001161444;NM_001161443;NM_001161442;NM_001161441	hyperM.iPSC
1	155081112	155081185	2	cg24845595,cg08728702	Body;Body,Body;Body	N_Shore,N_Shore	NTRK1;INSRR,NTRK1;INSRR	NM_001007792;NM_014215,NM_001007792;NM_014215	hyperM.iPSC
1	155094826	155096001	4	cg02049180,cg18649438,cg18534318,cg12995941	Body;Body,Body;TSS1500,Body;TSS1500;TSS1500;TSS1500,Body;TSS1500;TSS1500;TSS1500	N_Shore,Island,Island,Island	NTRK1;INSRR,NTRK1;INSRR,NTRK1;INSRR;NTRK1;NTRK1,NTRK1;INSRR;NTRK1;NTRK1	NM_001007792;NM_014215,NM_001007792;NM_014215,NM_001007792;NM_014215;NM_001012331;NM_002529,NM_001007792;NM_014215;NM_001012331;NM_002529	hypoM.iPSC
1	155129753	155130267	3	cg20948486,cg11594940,cg06188545	TSS1500,TSS200,5'UTR	N_Shore,N_Shore,Island	PEAR1,PEAR1,PEAR1	NM_001080471,NM_001080471,NM_001080471	hypoM.iPSC
1	155144815	155145142	2	cg08685714,cg00497172	Body,Body	Island,Island	PEAR1,PEAR1	NM_001080471,NM_001080471	hyperM.iPSC
1	155159973	155160497	3	cg05270291,cg26614154,cg06374307	Body,Body,Body	N_Shore,Island,Island	C1orf92,C1orf92,C1orf92	NM_144702,NM_144702,NM_144702	hypoM.iPSC
1	155173174	155173973	2	cg08480098,cg26543539	Body;TSS1500;Body,Body;TSS1500;Body	_,_	ARHGEF11;MIR765;ARHGEF11,ARHGEF11;MIR765;ARHGEF11	NM_014784;NR_030527;NM_198236,NM_014784;NR_030527;NM_198236	hyperM.iPSC
1	155279590	155279970	2	cg01960096,cg12632832	Body;Body,Body;Body	N_Shelf,N_Shore	ARHGEF11;ARHGEF11,ARHGEF11;ARHGEF11	NM_014784;NM_198236,NM_014784;NM_198236	hyperM.iPSC
1	155431180	155431959	4	cg21687740,cg09504320,cg13355424,cg08231697	_,_	Island,Island,Island,S_Shore	_,_	_,_	hyperM.iPSC
1	155757170	155757592	3	cg14833337,cg00248302,cg21443284	Body,Body,Body	_,_	FCRL5,FCRL5,FCRL5	NM_031281,NM_031281,NM_031281	hyperM.iPSC
1	155834344	155835215	2	cg01612158,cg17281600	1stExon,TSS1500	_,_	FCRL4,FCRL4	NM_031282,NM_031282	hyperM.iPSC
1	155934739	155935735	2	cg05956521,cg07184316	Body,Body	_,_	FCRL3,FCRL3	NM_052939,NM_052939	hyperM.iPSC
1	155936844	155938698	7	cg25259754,cg17134153,cg08786003,cg15602298,cg19602479,cg15202552,cg24881910	Body,5'UTR,TSS200,TSS200,TSS1500,TSS1500,TSS1500	_,_	FCRL3,FCRL3,FCRL3,FCRL3,FCRL3,FCRL3,FCRL3	NM_052939,NM_052939,NM_052939,NM_052939,NM_052939,NM_052939,NM_052939	hyperM.iPSC
1	156004452	156005082	3	cg12282588,cg20674248,cg05784088	Body,Body,Body	_,_	FCRL2,FCRL2,FCRL2	NM_030764,NM_030764,NM_030764	hyperM.iPSC
1	156161851	156163024	4	cg15649671,cg25024214,cg26114457,cg25028404	_,_	_,_	_,_	_,_	hyperM.iPSC
1	156386019	156386297	4	cg25200182,cg20030310,cg24298311,cg18873957	_,_	N_Shore,Island,Island,Island	_,_	_,_	hyperM.iPSC
1	156414070	156414253	2	cg10516993,cg12460133	_,_	Island,Island	_,_	_,_	hyperM.iPSC
1	156490545	156490558	2	cg03528325,cg07950803	TSS200,1stExon;5'UTR	_,_	CD1A,CD1A;CD1A	NM_001763,NM_001763;NM_001763	hyperM.iPSC
1	156524990	156526550	5	cg00173005,cg27534912,cg16993682,cg22610434,cg07548313	TSS1500,TSS1500,TSS1500,1stExon,Body	_,_	CD1C,CD1C,CD1C,CD1C,CD1C	NM_001765,NM_001765,NM_001765,NM_001765,NM_001765	hyperM.iPSC
1	156567357	156567662	2	cg15952487,cg04574507	Body,Body	_,_	CD1B,CD1B	NM_001764,NM_001764	hyperM.iPSC
1	156589465	156591878	6	cg10976626,cg09478478,cg03701795,cg12200412,cg26014409,cg09664215	TSS1500;TSS1500;TSS1500;TSS1500;TSS1500;TSS1500,TSS1500;TSS1500;TSS1500;TSS1500;TSS1500;TSS1500,TSS200;TSS200;TSS200;TSS200;TSS200;TSS200,Body;Body;Body;Body;Body;Body,Body;Body;Body;Body;Body;Body,Body;Body;Body;Body;Body;Body	_,_	CD1E;CD1E;CD1E;CD1E;CD1E;CD1E,CD1E;CD1E;CD1E;CD1E;CD1E;CD1E,CD1E;CD1E;CD1E;CD1E;CD1E;CD1E,CD1E;CD1E;CD1E;CD1E;CD1E;CD1E,CD1E;CD1E;CD1E;CD1E;CD1E;CD1E,CD1E;CD1E;CD1E;CD1E;CD1E;CD1E	NM_001042584;NM_001042587;NM_001042583;NM_001042586;NM_001042585;NM_030893,NM_001042584;NM_001042587;NM_001042583;NM_001042586;NM_001042585;NM_030893,NM_030893;NM_001042586;NM_001042587;NM_001042584;NM_001042585;NM_001042583,NM_001042587;NM_001042583;NM_001042584;NM_001042585;NM_001042586;NM_030893,NM_001042587;NM_001042583;NM_001042584;NM_001042585;NM_001042586;NM_030893,NM_001042587;NM_00104258…	hyperM.iPSC
1	156635513	156635736	2	cg15852352,cg15593510	1stExon,1stExon	_,_	OR10T2,OR10T2	NM_001004475,NM_001004475	hyperM.iPSC
1	156657273	156657743	3	cg26151206,cg27235829,cg01733284	1stExon,TSS200,TSS1500	_,_	OR10K2,OR10K2,OR10K2	NM_001004476,NM_001004476,NM_001004476	hyperM.iPSC
1	156701901	156702020	2	cg01463139,cg14088669	TSS200,1stExon	_,_	OR10K1,OR10K1	NM_001004473,NM_001004473	hyperM.iPSC
1	156732494	156732587	2	cg06100240,cg13353152	_,_	_,_	_,_	_,_	hyperM.iPSC
1	156815901	156816034	2	cg04923174,cg12129480	1stExon,1stExon	_,_	OR10X1,OR10X1	NM_001004477,NM_001004477	hyperM.iPSC
1	156936748	156937241	2	cg00119186,cg02245566	1stExon,TSS200	_,_	OR6K2,OR6K2	NM_001005279,NM_001005279	hyperM.iPSC
1	156955550	156955765	2	cg05369553,cg09318068	TSS1500,TSS1500	_,_	OR6K3,OR6K3	NM_001005327,NM_001005327	hyperM.iPSC
1	156990563	156991924	5	cg22601108,cg20410409,cg17025555,cg02613223,cg06084534	TSS1500,TSS1500,TSS1500,1stExon,1stExon	_,_	OR6K6,OR6K6,OR6K6,OR6K6,OR6K6	NM_001005184,NM_001005184,NM_001005184,NM_001005184,NM_001005184	hyperM.iPSC
1	157002736	157002936	2	cg04972930,cg24381587	1stExon,1stExon	_,_	OR6N1,OR6N1	NM_001005185,NM_001005185	hyperM.iPSC
1	157013235	157013901	2	cg11977941,cg12921481	1stExon,1stExon	_,_	OR6N2,OR6N2	NM_001005278,NM_001005278	hyperM.iPSC
1	157166712	157167173	2	cg21576886,cg26246880	TSS1500;TSS1500;TSS1500;TSS1500,TSS1500;TSS1500;TSS1500;TSS1500	_,_	PYHIN1;PYHIN1;PYHIN1;PYHIN1,PYHIN1;PYHIN1;PYHIN1;PYHIN1	NM_198930;NM_198929;NM_152501;NM_198928,NM_198930;NM_198929;NM_152501;NM_198928	hyperM.iPSC
1	157245581	157246465	5	cg21406461,cg01342196,cg17601658,cg07463059,cg20597486	TSS1500,TSS200,TSS200,5'UTR;1stExon,5'UTR;1stExon	_,_	IFI16,IFI16,IFI16,IFI16;IFI16,IFI16;IFI16	NM_005531,NM_005531,NM_005531,NM_005531;NM_005531,NM_005531;NM_005531	hyperM.iPSC
1	157313075	157313787	4	cg27541604,cg00490406,cg07195224,cg17515347	5'UTR;1stExon,TSS200,TSS1500,TSS1500	_,_	AIM2;AIM2,AIM2,AIM2,AIM2	NM_004833;NM_004833,NM_004833,NM_004833,NM_004833	hyperM.iPSC
1	157406996	157407326	2	cg11388664,cg15203777	TSS1500;TSS1500,TSS1500;TSS1500	N_Shore,N_Shore	CADM3;CADM3,CADM3;CADM3	NM_001127173;NM_021189,NM_001127173;NM_021189	hyperM.iPSC
1	157436899	157437837	2	cg04101015,cg15722977	Body;Body,3'UTR;3'UTR	_,_	CADM3;CADM3,CADM3;CADM3	NM_001127173;NM_021189,NM_001127173;NM_021189	hyperM.iPSC
1	157439840	157441919	9	cg10808936,cg23018689,cg27232482,cg19260329,cg07202479,cg18552413,cg04922029,cg11950577,cg20003179	TSS1500,TSS1500,TSS1500;TSS1500,TSS1500;TSS1500,TSS1500;TSS1500,TSS1500;5'UTR;1stExon,TSS1500;5'UTR;1stExon,5'UTR;Body;1stExon,Body;1stExon	_,_	DARC,DARC,DARC;DARC,DARC;DARC,DARC;DARC,DARC;DARC;DARC,DARC;DARC;DARC,DARC;DARC;DARC,DARC;DARC	NM_002036,NM_002036,NM_001122951;NM_002036,NM_001122951;NM_002036,NM_001122951;NM_002036,NM_001122951;NM_002036;NM_002036,NM_001122951;NM_002036;NM_002036,NM_001122951;NM_002036;NM_001122951,NM_002036;NM_001122951	hyperM.iPSC
1	157550160	157550922	3	cg19378892,cg23774016,cg13507224	1stExon,1stExon,1stExon	_,_	OR10J3,OR10J3,OR10J3	NM_001004467,NM_001004467,NM_001004467	hyperM.iPSC
1	157773183	157773786	4	cg15015426,cg07037019,cg06251978,cg26043322	TSS1500,TSS1500,TSS1500,TSS1500	_,_	OR10J5,OR10J5,OR10J5,OR10J5	NM_001004469,NM_001004469,NM_001004469,NM_001004469	hyperM.iPSC
1	157823881	157825136	5	cg13968061,cg01443488,cg03856044,cg26353877,cg21291134	TSS1500,TSS200,5'UTR;1stExon,Body,3'UTR	_,_	APCS,APCS,APCS;APCS,APCS,APCS	NM_001639,NM_001639,NM_001639;NM_001639,NM_001639,NM_001639	hyperM.iPSC
1	157949971	157951809	9	cg09267046,cg14988790,cg01365152,cg17520909,cg15553852,cg06779393,cg03543081,cg05147692,cg15076824	Body,Body,Body,Body,Body,1stExon;5'UTR,TSS200,TSS1500,TSS1500	_,_	CRP,CRP,CRP,CRP,CRP,CRP;CRP,CRP,CRP,CRP	NM_000567,NM_000567,NM_000567,NM_000567,NM_000567,NM_000567;NM_000567,NM_000567,NM_000567,NM_000567	hyperM.iPSC
1	158091673	158092252	5	cg10839385,cg07961479,cg00303378,cg24035898,cg12217625	Body;5'UTR;1stExon,Body;TSS200,Body;TSS1500,Body;TSS1500,Body;TSS1500	S_Shore,S_Shore,S_Shore,S_Shore,S_Shore	VSIG8;C1orf204;C1orf204,VSIG8;C1orf204,VSIG8;C1orf204,VSIG8;C1orf204,VSIG8;C1orf204	NM_001013661;NM_001134233;NM_001134233,NM_001013661;NM_001134233,NM_001013661;NM_001134233,NM_001013661;NM_001134233,NM_001013661;NM_001134233	hyperM.iPSC
1	158136701	158136950	2	cg25153824,cg03685774	TSS200,TSS1500	Island,S_Shore	CCDC19,CCDC19	NM_012337,NM_012337	hypoM.iPSC
1	158160320	158160685	2	cg22698489,cg16107628	5'UTR,5'UTR	N_Shore,N_Shore	TAGLN2,TAGLN2	NM_003564,NM_003564	hyperM.iPSC
1	158162215	158162288	2	cg21571466,cg04116858	TSS1500,TSS1500	S_Shore,S_Shore	TAGLN2,TAGLN2	NM_003564,NM_003564	hyperM.iPSC
1	158190149	158190485	2	cg09737668,cg21022868	Body;Body;Body,Body;Body;Body	_,_	SLAMF9;SLAMF9;SLAMF9,SLAMF9;SLAMF9;SLAMF9	NM_001146173;NM_033438;NM_001146172,NM_001146173;NM_033438;NM_001146172	hyperM.iPSC
1	158277637	158278753	3	cg02861293,cg10321263,cg14008399	3'UTR,Body,Body	_,_	KCNJ10,KCNJ10,KCNJ10	NM_002241,NM_002241,NM_002241	hyperM.iPSC
1	158317501	158318062	6	cg12907876,cg20066612,cg06808585,cg24509168,cg08665772,cg09808786	TSS1500,TSS1500,TSS1500,TSS200,5'UTR;1stExon,5'UTR;1stExon	N_Shelf,N_Shelf,N_Shelf,N_Shelf,N_Shelf,N_Shelf	KCNJ9,KCNJ9,KCNJ9,KCNJ9,KCNJ9;KCNJ9,KCNJ9;KCNJ9	NM_004983,NM_004983,NM_004983,NM_004983,NM_004983;NM_004983,NM_004983;NM_004983	hyperM.iPSC
1	158320313	158320945	2	cg13552867,cg07187808	5'UTR,Body	N_Shore,Island	KCNJ9,KCNJ9	NM_004983,NM_004983	hyperM.iPSC
1	158327721	158328037	2	ch.1.3128389F,cg14210114	_,3'UTR	_,_	_,IGSF8	_,NM_052868	hyperM.iPSC
1	158350887	158351022	2	cg01448881,cg13149890	TSS1500,TSS1500	_,_	ATP1A2,ATP1A2	NM_000702,NM_000702	hyperM.iPSC
1	158352120	158352205	3	cg07177379,cg24437523,cg20632887	TSS200,1stExon;5'UTR,1stExon;5'UTR	_,_	ATP1A2,ATP1A2;ATP1A2,ATP1A2;ATP1A2	NM_000702,NM_000702;NM_000702,NM_000702;NM_000702	hypoM.iPSC
1	158387825	158387907	2	cg06956052,cg06517798	TSS200,TSS200	_,_	ATP1A4,ATP1A4	NM_144699,NM_144699	hyperM.iPSC
1	158412567	158412966	4	cg02514914,cg07022307,cg08279665,cg16289896	TSS1500;Body,TSS1500;Body,TSS1500;Body,TSS1500;Body	_,_	ATP1A4;ATP1A4,ATP1A4;ATP1A4,ATP1A4;ATP1A4,ATP1A4;ATP1A4	NM_001001734;NM_144699,NM_001001734;NM_144699,NM_001001734;NM_144699,NM_001001734;NM_144699	hyperM.iPSC
1	158426294	158426936	4	cg02297709,cg15926420,cg08246428,cg18862562	TSS1500,TSS1500,TSS200,1stExon;5'UTR	_,_	CASQ1,CASQ1,CASQ1,CASQ1;CASQ1	NM_001231,NM_001231,NM_001231,NM_001231;NM_001231	hyperM.iPSC
1	158522428	158522756	2	cg18198545,cg17880320	TSS1500;TSS1500,TSS1500;TSS1500	_,_	PEX19;PEX19,PEX19;PEX19	NM_001131039;NM_002857,NM_001131039;NM_002857	hyperM.iPSC
1	158578517	158578806	2	cg00689010,cg10382814	Body;Body;TSS1500,Body;Body;TSS1500	N_Shore,N_Shore	COPA;COPA;NCSTN,COPA;COPA;NCSTN	NM_004371;NM_001098398;NM_015331,NM_004371;NM_001098398;NM_015331	hyperM.iPSC
1	158603099	158603662	6	cg18023842,cg08247612,cg13992678,cg00006397,cg00881010,cg00955867	TSS1500,TSS1500,TSS1500,TSS200,TSS200,1stExon;5'UTR	_,N_Shelf,N_Shelf,N_Shelf	NHLH1,NHLH1,NHLH1,NHLH1,NHLH1,NHLH1;NHLH1	NM_005598,NM_005598,NM_005598,NM_005598,NM_005598,NM_005598;NM_005598	hyperM.iPSC
1	158607332	158607730	3	cg26875665,cg21538190,cg01877084	Body,Body,3'UTR	Island,Island,S_Shore	NHLH1,NHLH1,NHLH1	NM_005598,NM_005598,NM_005598	hyperM.iPSC
1	158655588	158657733	5	cg24688563,cg02951880,cg25100296,cg06928484,cg02660165	Body,Body,Body,Body,Body	N_Shore,Island,Island,S_Shore,S_Shore	VANGL2,VANGL2,VANGL2,VANGL2,VANGL2	NM_020335,NM_020335,NM_020335,NM_020335,NM_020335	hyperM.iPSC
1	158759485	158759713	2	cg10671066,cg21829783	Body,TSS200	_,_	SLAMF6,SLAMF6	NM_052931,NM_052931	hyperM.iPSC
1	158786049	158787249	4	cg27304328,cg12034938,cg24691964,cg19312356	Body,Body,Body,Body	_,_	CD84,CD84,CD84,CD84	NM_003874,NM_003874,NM_003874,NM_003874	hyperM.iPSC
1	158815782	158815885	2	cg16776350,cg13978689	Body,TSS200	_,_	CD84,CD84	NM_003874,NM_003874	hyperM.iPSC
1	158817112	158817271	2	cg02945019,cg19718360	TSS1500,TSS1500	_,_	CD84,CD84	NM_003874,NM_003874	hyperM.iPSC
1	158883228	158884598	8	cg20535085,cg18881723,cg18886071,cg01710351,cg00149213,cg03950000,cg21920303,cg05694771	Body,5'UTR;1stExon,5'UTR;1stExon,TSS200,TSS200,TSS1500,TSS1500,TSS1500	_,_	SLAMF1,SLAMF1;SLAMF1,SLAMF1;SLAMF1,SLAMF1,SLAMF1,SLAMF1,SLAMF1,SLAMF1	NM_003037,NM_003037;NM_003037,NM_003037;NM_003037,NM_003037,NM_003037,NM_003037,NM_003037,NM_003037	hyperM.iPSC
1	158948028	158949279	5	cg13311440,cg19408145,cg05200628,cg16909402,cg24154340	Body,1stExon,TSS200,TSS1500,TSS1500	_,_	CD48,CD48,CD48,CD48,CD48	NM_001778,NM_001778,NM_001778,NM_001778,NM_001778	hyperM.iPSC
1	158975611	158975863	3	cg04244970,cg07837085,cg11721194	TSS200,TSS200,Body	_,_	SLAMF7,SLAMF7,SLAMF7	NM_021181,NM_021181,NM_021181	hyperM.iPSC
1	159031288	159033159	7	cg12810626,cg18805892,cg23038349,cg23050079,cg18920397,cg18865207,cg01367992	TSS1500;TSS1500,TSS1500;TSS1500,TSS1500;TSS1500,TSS1500;TSS1500,TSS200;TSS200,TSS200;TSS200,Body;Body	_,_	LY9;LY9,LY9;LY9,LY9;LY9,LY9;LY9,LY9;LY9,LY9;LY9,LY9;LY9	NM_001033667;NM_002348,NM_001033667;NM_002348,NM_001033667;NM_002348,NM_001033667;NM_002348,NM_001033667;NM_002348,NM_001033667;NM_002348,NM_001033667;NM_002348	hyperM.iPSC
1	159038474	159038524	2	cg14512089,cg11948252	3'UTR;Body,3'UTR;Body	Island,Island	LY9;LY9,LY9;LY9	NM_001033667;NM_002348,NM_001033667;NM_002348	hyperM.iPSC
1	159099286	159100184	2	cg10106388,cg11939496	1stExon;5'UTR;1stExon;5'UTR;5'UTR;1stExon,TSS1500;TSS1500;TSS1500	_,_	CD244;CD244;CD244;CD244;CD244;CD244,CD244;CD244;CD244	NM_016382;NM_001166663;NM_001166663;NM_001166664;NM_016382;NM_001166664,NM_001166663;NM_016382;NM_001166664	hyperM.iPSC
1	159121578	159121772	2	cg21476940,cg10094191	5'UTR;1stExon,TSS200	_,_	ITLN1;ITLN1,ITLN1	NM_017625;NM_017625,NM_017625	hyperM.iPSC
1	159191013	159192267	4	cg18641937,cg24528307,cg15836912,cg21272095	Body,TSS1500,TSS1500,TSS1500	_,_	ITLN2,ITLN2,ITLN2,ITLN2	NM_080878,NM_080878,NM_080878,NM_080878	hyperM.iPSC
1	159274258	159274751	2	cg12898512,cg11578532	Body;3'UTR;Body,Body;Body;Body	N_Shore,N_Shore	TSTD1;TSTD1;TSTD1,TSTD1;TSTD1;TSTD1	NM_001113207;NM_001113205;NM_001113206,NM_001113207;NM_001113205;NM_001113206	hypoM.iPSC
1	159306305	159306319	3	cg12081303,cg00045607,cg03089651	1stExon;5'UTR;5'UTR;1stExon,1stExon;5'UTR;5'UTR;1stExon,1stExon;5'UTR;5'UTR;1stExon	_,_	ARHGAP30;ARHGAP30;ARHGAP30;ARHGAP30,ARHGAP30;ARHGAP30;ARHGAP30;ARHGAP30,ARHGAP30;ARHGAP30;ARHGAP30;ARHGAP30	NM_181720;NM_001025598;NM_181720;NM_001025598,NM_181720;NM_001025598;NM_181720;NM_001025598,NM_181720;NM_001025598;NM_181720;NM_001025598	hyperM.iPSC
1	159315771	159316851	7	cg12808664,cg24599107,cg10888244,cg16276523,cg10453343,cg19272744,cg07832203	Body,Body,Body,Body,Body,Body,Body	N_Shore,Island,Island,Island,Island,Island,S_Shore	PVRL4,PVRL4,PVRL4,PVRL4,PVRL4,PVRL4,PVRL4	NM_030916,NM_030916,NM_030916,NM_030916,NM_030916,NM_030916,NM_030916	hyperM.iPSC
1	159326082	159326159	2	cg14158583,cg03166324	TSS200,TSS200	_,_	PVRL4,PVRL4	NM_030916,NM_030916	hyperM.iPSC
1	159355581	159355742	3	cg06182359,cg05650171,cg04991214	TSS1500;Body,TSS1500;Body,TSS1500;Body	S_Shore,S_Shore,S_Shore	PFDN2;NIT1,PFDN2;NIT1,PFDN2;NIT1	NM_012394;NM_005600,NM_012394;NM_005600,NM_012394;NM_005600	hyperM.iPSC
1	159395191	159395344	3	cg01447427,cg17017284,cg18176482	TSS1500;3'UTR;TSS1500,TSS1500;TSS1500,TSS1500;TSS1500	N_Shore,N_Shore,N_Shore	USP21;UFC1;USP21,USP21;USP21,USP21;USP21	NM_012475;NM_016406;NM_001014443,NM_012475;NM_001014443,NM_012475;NM_001014443	hyperM.iPSC
1	159434369	159435788	8	cg04436964,cg17904988,cg04263215,cg07354440,cg10493436,cg14382215,cg08545169,cg11801851	TSS1500;Body,TSS1500;1stExon;5'UTR,TSS1500;TSS200,TSS1500;TSS200,TSS200;TSS200,TSS200;TSS200,5'UTR;1stExon;TSS1500,5'UTR;1stExon;TSS1500	_,N_Shelf,N_Shelf,N_Shelf,N_Shelf,N_Shelf,N_Shelf,N_Shelf	NDUFS2;ADAMTS4,NDUFS2;ADAMTS4;ADAMTS4,NDUFS2;ADAMTS4,NDUFS2;ADAMTS4,NDUFS2;ADAMTS4,NDUFS2;ADAMTS4,NDUFS2;NDUFS2;ADAMTS4,NDUFS2;NDUFS2;ADAMTS4	NM_004550;NM_005099,NM_004550;NM_005099;NM_005099,NM_004550;NM_005099,NM_004550;NM_005099,NM_004550;NM_005099,NM_004550;NM_005099,NM_004550;NM_004550;NM_005099,NM_004550;NM_004550;NM_005099	hyperM.iPSC
1	159437835	159438443	6	cg24049880,cg05656486,cg08850169,cg23274951,cg07580762,cg21691116	5'UTR;TSS1500,5'UTR;TSS1500,5'UTR;TSS1500,5'UTR;TSS1500,5'UTR;TSS200,5'UTR;TSS200	N_Shore,N_Shore,N_Shore,N_Shore,Island,Island	NDUFS2;NDUFS2,NDUFS2;NDUFS2,NDUFS2;NDUFS2,NDUFS2;NDUFS2,NDUFS2;NDUFS2,NDUFS2;NDUFS2	NM_004550;NM_001166159,NM_004550;NM_001166159,NM_004550;NM_001166159,NM_004550;NM_001166159,NM_004550;NM_001166159,NM_004550;NM_001166159	hyperM.iPSC
1	159451685	159451716	2	cg24465943,cg13853198	TSS200,1stExon;5'UTR	_,_	FCER1G,FCER1G;FCER1G	NM_004106,NM_004106;NM_004106	hyperM.iPSC
1	159460017	159460615	2	cg23241914,cg01053621	1stExon;5'UTR,TSS1500	_,_	APOA2;APOA2,APOA2	NM_001643;NM_001643,NM_001643	hyperM.iPSC
1	159493992	159494827	3	cg27174983,cg16702725,cg01425967	TSS1500,TSS1500,TSS1500	N_Shore,N_Shore,N_Shore	PCP4L1,PCP4L1,PCP4L1	NM_001102566,NM_001102566,NM_001102566	hyperM.iPSC
1	159545732	159546386	2	cg10431340,cg00259886	Body,TSS200	_,_	MPZ,MPZ	NM_000530,NM_000530	hyperM.iPSC
1	159635411	159635571	2	cg23915527,cg03441844	_,_	N_Shore,Island	_,_	_,_	hyperM.iPSC
1	159741864	159742493	2	cg27470554,cg27565811	5'UTR;5'UTR;1stExon;1stExon,Body;Body	_,_	FCGR2A;FCGR2A;FCGR2A;FCGR2A,FCGR2A;FCGR2A	NM_001136219;NM_021642;NM_001136219;NM_021642,NM_021642;NM_001136219	hyperM.iPSC
1	159761476	159761582	2	cg17405122,cg07392520	1stExon,1stExon	Island,Island	HSPA6,HSPA6	NM_002155,NM_002155	hyperM.iPSC
1	159867677	159868626	2	cg00974864,cg26561570	5'UTR;1stExon,TSS1500	_,_	FCGR3B;FCGR3B,FCGR3B	NM_000570;NM_000570,NM_000570	hyperM.iPSC
1	159942890	159943205	3	cg24664855,cg05033369,cg24074594	TSS1500,TSS1500,TSS200	_,_	FCRLA,FCRLA,FCRLA	NM_032738,NM_032738,NM_032738	hyperM.iPSC
1	159957638	159958535	2	cg22678092,cg00160981	TSS1500,TSS1500	_,N_Shelf	FCRLB,FCRLB	NM_001002901,NM_001002901	hyperM.iPSC
1	160603501	160603999	5	cg02858267,cg26663636,cg11687863,cg12486795,cg26813162	Body;Body;Body,Body;Body;Body,Body;Body;Body,3'UTR;3'UTR;3'UTR,3'UTR;3'UTR;3'UTR	Island,Island,Island,Island,S_Shore	NOS1AP;NOS1AP;NOS1AP,NOS1AP;NOS1AP;NOS1AP,NOS1AP;NOS1AP;NOS1AP,NOS1AP;NOS1AP;NOS1AP,NOS1AP;NOS1AP;NOS1AP	NM_014697;NM_001126060;NM_001164757,NM_014697;NM_001126060;NM_001164757,NM_014697;NM_001126060;NM_001164757,NM_014697;NM_001164757;NM_001126060,NM_014697;NM_001164757;NM_001126060	hyperM.iPSC
1	160610409	160610485	2	cg00832644,cg01930947	3'UTR,Body	_,_	C1orf111,C1orf111	NM_182581,NM_182581	hyperM.iPSC
1	160614634	160615096	2	cg14701962,cg10113864	TSS1500;TSS1500,TSS1500	_,_	C1orf226;C1orf111,C1orf226	NM_001135240;NM_182581,NM_001135240	hyperM.iPSC
1	160617991	160618647	4	cg19678111,cg25212701,cg21547763,cg11342789	Body;TSS200,5'UTR;Body;1stExon,Body;1stExon,Body;Body	_,_	C1orf226;C1orf226,C1orf226;C1orf226;C1orf226,C1orf226;C1orf226,C1orf226;C1orf226	NM_001135240;NM_001085375,NM_001085375;NM_001135240;NM_001085375,NM_001135240;NM_001085375,NM_001085375;NM_001135240	hyperM.iPSC
1	160867958	160869157	7	cg17217691,cg23028772,cg00819233,cg17496788,cg06325209,cg00457087,cg21880888	TSS1500;TSS1500,TSS1500;TSS1500,TSS1500;TSS1500,TSS1500;TSS1500,TSS200;TSS200,1stExon;1stExon;5'UTR;5'UTR,5'UTR;5'UTR	_,_	DDR2;DDR2,DDR2;DDR2,DDR2;DDR2,DDR2;DDR2,DDR2;DDR2,DDR2;DDR2;DDR2;DDR2,DDR2;DDR2	NM_001014796;NM_006182,NM_001014796;NM_006182,NM_001014796;NM_006182,NM_001014796;NM_006182,NM_006182;NM_001014796,NM_001014796;NM_006182;NM_006182;NM_001014796,NM_006182;NM_001014796	hyperM.iPSC
1	161058716	161059237	2	cg09820101,cg14252661	_,_	N_Shore,S_Shore	_,_	_,_	hypoM.iPSC
1	161305327	161305636	2	cg15923350,cg22605643	1stExon;5'UTR;TSS1500;TSS200,1stExon;Body;TSS200;5'UTR	_,_	RGS4;RGS4;RGS4;RGS4,RGS4;RGS4;RGS4;RGS4	NM_001102445;NM_001102445;NM_001113381;NM_005613,NM_005613;NM_001102445;NM_001113381;NM_005613	hyperM.iPSC
1	161659106	161659723	3	cg06943309,cg01782790,cg00306838	_,_	N_Shore,Island,Island	_,_	_,_	hyperM.iPSC
1	162556803	162556822	2	cg09871685,cg23619357	_,_	N_Shore,N_Shore	_,_	_,_	hyperM.iPSC
1	162812407	162812767	2	cg00222472,cg22238122	Body,Body	Island,S_Shore	PBX1,PBX1	NM_002585,NM_002585	hypoM.iPSC
1	163353490	163353649	3	cg00647217,cg27003520,cg24641302	_,_	Island,Island,Island	_,_	_,_	hyperM.iPSC
1	163449923	163450263	2	cg10103187,cg05899118	TSS1500;TSS1500;Body,TSS1500;TSS1500;Body	_,_	LMX1A;LMX1A;LMX1A,LMX1A;LMX1A;LMX1A	NM_177399;NM_001033507;NM_177398,NM_177399;NM_001033507;NM_177398	hyperM.iPSC
1	163587848	163588723	2	cg05127450,cg07135032	Body,Body	N_Shore,Island	LMX1A,LMX1A	NM_177398,NM_177398	hypoM.iPSC
1	163590316	163591303	4	cg19924619,cg17787084,cg08291024,cg09806671	Body,Body,Body,Body	Island,N_Shore,Island,Island	LMX1A,LMX1A,LMX1A,LMX1A	NM_177398,NM_177398,NM_177398,NM_177398	hypoM.iPSC
1	163592893	163592969	3	cg23971170,cg02361878,cg02054776	TSS1500,TSS1500,TSS1500	Island,Island,S_Shore	LMX1A,LMX1A,LMX1A	NM_177398,NM_177398,NM_177398	hypoM.iPSC
1	163596343	163596581	2	cg05267756,cg21413947	_,_	S_Shelf,S_Shelf	_,_	_,_	hyperM.iPSC
1	163680813	163681235	2	cg00349776,cg08623787	5'UTR;5'UTR;1stExon;1stExon,TSS200;TSS200	_,_	RXRG;RXRG;RXRG;RXRG,RXRG;RXRG	NM_001009598;NM_006917;NM_006917;NM_001009598,NM_006917;NM_001009598	hyperM.iPSC
1	163681430	163681781	3	cg12404281,cg17514495,cg07091781	TSS1500;TSS1500,TSS1500;TSS1500,TSS1500;TSS1500	_,_	RXRG;RXRG,RXRG;RXRG,RXRG;RXRG	NM_006917;NM_001009598,NM_006917;NM_001009598,NM_006917;NM_001009598	hypoM.iPSC
1	163779022	163780340	8	cg03454607,cg16509443,cg00986742,cg10842229,cg09550041,cg20964423,cg15328271,cg18168448	Body;TSS1500,Body;TSS1500,Body;TSS200,Body;TSS200,Body;TSS200,Body;TSS200,1stExon;Body,1stExon;Body	_,_	LOC400794;LRRC52,LOC400794;LRRC52,LOC400794;LRRC52,LOC400794;LRRC52,LOC400794;LRRC52,LOC400794;LRRC52,LRRC52;LOC400794,LRRC52;LOC400794	NR_026744;NM_001005214,NR_026744;NM_001005214,NR_026744;NM_001005214,NR_026744;NM_001005214,NR_026744;NM_001005214,NR_026744;NM_001005214,NM_001005214;NR_026744,NM_001005214;NR_026744	hyperM.iPSC
1	163934805	163934973	2	cg11373746,cg04084052	TSS1500,TSS1500	S_Shore,S_Shore	ALDH9A1,ALDH9A1	NM_000696,NM_000696	hyperM.iPSC
1	164306068	164306542	5	cg21908886,cg27519145,cg03421657,cg02456804,cg11407681	3'UTR,Body,Body,Body,Body	_,_	FAM78B,FAM78B,FAM78B,FAM78B,FAM78B	NM_001017961,NM_001017961,NM_001017961,NM_001017961,NM_001017961	hyperM.iPSC
1	164390730	164392016	4	cg17940268,cg24554839,cg17323982,cg10332369	TSS200;Body,TSS1500;Body,TSS1500;Body,TSS1500;Body	_,_	MIR921;FAM78B,MIR921;FAM78B,MIR921;FAM78B,MIR921;FAM78B	NR_030626;NM_001017961,NR_030626;NM_001017961,NR_030626;NM_001017961,NR_030626;NM_001017961	hyperM.iPSC
1	164403254	164403563	3	cg14153737,cg19708554,cg03272326	TSS1500,TSS1500,TSS1500	S_Shore,S_Shore,S_Shore	FAM78B,FAM78B,FAM78B	NM_001017961,NM_001017961,NM_001017961	hyperM.iPSC
1	165032437	165032676	3	cg18193680,cg22377166,cg23615262	_,_	_,_	_,_	_,_	hyperM.iPSC
1	165112632	165112806	3	cg26870903,cg20672205,cg26565099	TSS1500,TSS1500,TSS1500	S_Shore,S_Shore,S_Shore	TADA1,TADA1,TADA1	NM_053053,NM_053053,NM_053053	hyperM.iPSC
1	165120021	165120436	5	cg11849738,cg26248173,cg15473017,cg10508760,cg25848076	_,_	Island,Island,Island,Island,S_Shore	_,_	_,_	hyperM.iPSC
1	165330205	165330715	3	cg01598007,cg05460716,cg13179074	TSS1500,TSS1500,1stExon	_,_	DUSP27,DUSP27,DUSP27	NM_001080426,NM_001080426,NM_001080426	hyperM.iPSC
1	165357242	165357381	2	cg04138112,cg11236550	Body,Body	Island,Island	DUSP27,DUSP27	NM_001080426,NM_001080426	hyperM.iPSC
1	165674138	165675822	8	cg17111087,cg01396157,cg21161394,cg02648847,cg12446199,cg06900257,cg12184421,cg11958495	Body;Body,Body;Body,Body;Body,Body;Body,Body;Body,Body;Body,Body;Body,Body;Body	N_Shore,N_Shore,Island,Island,Island,Island,Island,S_Shore	CD247;CD247,CD247;CD247,CD247;CD247,CD247;CD247,CD247;CD247,CD247;CD247,CD247;CD247,CD247;CD247	NM_198053;NM_000734,NM_198053;NM_000734,NM_198053;NM_000734,NM_198053;NM_000734,NM_198053;NM_000734,NM_198053;NM_000734,NM_198053;NM_000734,NM_198053;NM_000734	hyperM.iPSC
1	165753602	165754020	2	cg14278300,cg05799811	Body;Body,Body;Body	_,_	CD247;CD247,CD247;CD247	NM_198053;NM_000734,NM_198053;NM_000734	hyperM.iPSC
1	165776542	165777463	2	cg24693760,cg26607897	_,3'UTR	_,_	_,CREG1	_,NM_003851	hyperM.iPSC
1	165865145	165866454	5	cg15676719,cg04275362,cg01782826,cg12336540,cg07751287	TSS1500,TSS1500,TSS1500,TSS1500,Body	N_Shore,N_Shore,N_Shore,N_Shore,Island	RCSD1,RCSD1,RCSD1,RCSD1,RCSD1	NM_052862,NM_052862,NM_052862,NM_052862,NM_052862	hypoM.iPSC
1	165957062	165957350	2	cg04846203,cg01565130	TSS1500;TSS1500;TSS1500,TSS1500;TSS1500;TSS1500	N_Shore,N_Shore	MPZL1;MPZL1;MPZL1,MPZL1;MPZL1;MPZL1	NM_024569;NM_003953;NM_001146191,NM_024569;NM_003953;NM_001146191	hyperM.iPSC
1	166170908	166171299	2	cg12749559,cg25130277	Body;Body;Body,TSS1500;Body;Body;TSS1500;Body	N_Shore,N_Shore	BRP44;BRP44;BRP44,DCAF6;BRP44;BRP44;DCAF6;BRP44	NR_026550;NM_015415;NM_001143674,NM_018442;NR_026550;NM_015415;NM_001017977;NM_001143674	hyperM.iPSC
1	166463282	166463822	2	cg10625365,cg08738280	Body,Body	S_Shore,S_Shore	SFT2D2,SFT2D2	NM_199344,NM_199344	hyperM.iPSC
1	166964973	166965103	3	cg26220985,cg09922481,cg21266845	1stExon,TSS200,TSS200	_,_	DPT,DPT,DPT	NM_001937,NM_001937,NM_001937	hyperM.iPSC
1	167822429	167823281	4	cg01953591,cg25256723,cg16054275,cg09470963	TSS200,TSS200,TSS1500,TSS1500	_,_	F5,F5,F5,F5	NM_000130,NM_000130,NM_000130,NM_000130	hyperM.iPSC
1	167865836	167866182	2	cg01459453,cg09060914	Body,TSS200	_,_	SELP,SELP	NM_003005,NM_003005	hyperM.iPSC
1	167969465	167969856	2	cg06093460,cg16660677	5'UTR,TSS200	_,_	SELE,SELE	NM_000450,NM_000450	hyperM.iPSC
1	168381666	168381975	2	cg12500707,cg03192897	TSS200,1stExon	_,_	METTL11B,METTL11B	NM_001136107,NM_001136107	hypoM.iPSC
1	168895672	168897021	5	cg11953609,cg06926146,cg22795586,cg22797031,cg03760589	_,_	N_Shore,N_Shore,N_Shore,N_Shore,N_Shore	_,_	_,_	hypoM.iPSC
1	168905431	168905541	2	cg09010107,cg07957294	Body;Body,Body;Body	_,_	PRRX1;PRRX1,PRRX1;PRRX1	NM_022716;NM_006902,NM_022716;NM_006902	hypoM.iPSC
1	169326682	169326695	2	cg26794028,cg18063149	5'UTR;1stExon;5'UTR;1stExon,5'UTR;1stExon;5'UTR;1stExon	_,_	FMO3;FMO3;FMO3;FMO3,FMO3;FMO3;FMO3;FMO3	NM_001002294;NM_001002294;NM_006894;NM_006894,NM_001002294;NM_001002294;NM_006894;NM_006894	hyperM.iPSC
1	169372549	169373021	2	cg11819201,cg06041466	TSS1500,TSS1500	_,_	FMO6P,FMO6P	NR_002601,NR_002601	hyperM.iPSC
1	169421099	169421426	3	cg18375642,cg14721213,cg00700214	5'UTR;1stExon,5'UTR,5'UTR	_,_	FMO2;FMO2,FMO2,FMO2	NM_001460;NM_001460,NM_001460,NM_001460	hyperM.iPSC
1	169493326	169493617	2	cg11192688,cg16034517	5'UTR,5'UTR	_,_	FMO1,FMO1	NM_002021,NM_002021	hyperM.iPSC
1	169887902	169888564	3	cg04106076,cg22077553,cg01410279	1stExon,1stExon,TSS200	_,_	MYOC,MYOC,MYOC	NM_000261,NM_000261,NM_000261	hyperM.iPSC
1	170380129	170381042	6	cg02633729,cg25214966,cg24002149,cg21450888,cg17178220,cg03322057	Body;Body,Body;Body;Body,Body;TSS200;Body,Body;Body;TSS1500,Body;Body;TSS1500,Body;Body;TSS1500	_,_	DNM3;DNM3,MIR199A2;DNM3;DNM3,DNM3;MIR199A2;DNM3,DNM3;DNM3;MIR199A2,DNM3;DNM3;MIR199A2,DNM3;DNM3;MIR199A2	NM_015569;NM_001136127,NR_029618;NM_015569;NM_001136127,NM_015569;NR_029618;NM_001136127,NM_015569;NM_001136127;NR_029618,NM_015569;NM_001136127;NR_029618,NM_015569;NM_001136127;NR_029618	hyperM.iPSC
1	171837931	171837968	2	cg02890044,cg15975283	5'UTR,5'UTR	_,_	SLC9A11,SLC9A11	NM_178527,NM_178527	hyperM.iPSC
1	171905694	171906823	4	cg04446579,cg22529184,cg12525949,cg17267239	TSS200,TSS1500,TSS1500,TSS1500	S_Shore,S_Shore,S_Shore,S_Shore	ANKRD45,ANKRD45,ANKRD45,ANKRD45	NM_198493,NM_198493,NM_198493,NM_198493	hyperM.iPSC
1	172101834	172102612	2	cg14564638,cg16290996	Body;TSS1500;TSS200;TSS1500;TSS1500,Body;TSS1500;TSS200;TSS1500;TSS1500;TSS1500	N_Shore,N_Shore	GAS5;SNORD78;SNORD44;SNORD80;SNORD79,GAS5;SNORD78;SNORD76;SNORD77;SNORD44;SNORD79	NR_002578;NR_003944;NR_002750;NR_003940;NR_003939,NR_002578;NR_003944;NR_003942;NR_003943;NR_002750;NR_003939	hypoM.iPSC
1	172153634	172153983	2	cg14047008,cg01802953	TSS1500,TSS1500	_,_	SERPINC1,SERPINC1	NM_000488,NM_000488	hyperM.iPSC
1	173110377	173111113	4	cg02482603,cg04858586,cg13130398,cg07285983	TSS1500;Body,TSS1500;Body,TSS1500;Body,Body;TSS200	_,_	RABGAP1L;RABGAP1L,RABGAP1L;RABGAP1L,RABGAP1L;RABGAP1L,RABGAP1L;RABGAP1L	NM_001035230;NM_014857,NM_001035230;NM_014857,NM_001035230;NM_014857,NM_014857;NM_001035230	hypoM.iPSC
1	173200197	173201084	3	cg17516247,ch.1.173201044F,ch.1.173201084F	_,_	_,_	_,_	_,_	hyperM.iPSC
1	173279777	173280683	3	cg01058584,cg15552895,cg16560173	_,_	_,_	_,_	_,_	hyperM.iPSC
1	173317102	173317795	2	cg19371121,cg12640930	Body,Body	S_Shore,S_Shelf	TNN,TNN	NM_022093,NM_022093	hyperM.iPSC
1	173396807	173397478	2	cg21266698,cg10438879	5'UTR;5'UTR;5'UTR;5'UTR,5'UTR;5'UTR;5'UTR;5'UTR	_,_	KIAA0040;KIAA0040;KIAA0040;KIAA0040,KIAA0040;KIAA0040;KIAA0040;KIAA0040	NM_001162894;NM_001162895;NM_014656;NM_001162893,NM_001162894;NM_001162895;NM_014656;NM_001162893	hyperM.iPSC
1	173621916	173621985	2	cg09586034,cg11796258	Body,Body	_,_	TNR,TNR	NM_003285,NM_003285	hyperM.iPSC
1	173979005	173979842	3	cg07107171,cg05996213,cg20933713	5'UTR;1stExon,5'UTR;1stExon,TSS1500	_,_	TNR;TNR,TNR;TNR,TNR	NM_003285;NM_003285,NM_003285;NM_003285,NM_003285	hyperM.iPSC
1	174123536	174124442	2	cg15139452,cg05888252	_,_	_,_	_,_	_,_	hypoM.iPSC
1	174204173	174204568	2	cg05131292,cg07813445	Body;Body;Body,TSS1500;Body;Body	_,_	SCARNA3;RFWD2;RFWD2,SCARNA3;RFWD2;RFWD2	NR_002998;NM_022457;NM_001001740,NR_002998;NM_022457;NM_001001740	hyperM.iPSC
1	174698785	174699121	2	cg02051981,cg10994126	TSS200;TSS200,1stExon;5'UTR;1stExon;5'UTR	_,_	PAPPA2;PAPPA2,PAPPA2;PAPPA2;PAPPA2;PAPPA2	NM_021936;NM_020318,NM_021936;NM_021936;NM_020318;NM_020318	hyperM.iPSC
1	175078001	175078268	2	cg26406924,cg15991207	Body,3'UTR	_,_	PAPPA2,PAPPA2	NM_020318,NM_020318	hyperM.iPSC
1	175268526	175268851	2	cg18865685,cg22506490	Body;Body,Body;Body	_,_	ASTN1;ASTN1,ASTN1;ASTN1	NM_207108;NM_004319,NM_207108;NM_004319	hyperM.iPSC
1	175492473	175492511	3	cg01931994,cg19315261,cg26272214	Body,Body,Body	_,_	FAM5B,FAM5B,FAM5B	NM_021165,NM_021165,NM_021165	hyperM.iPSC
1	176328141	176328568	2	cg15007813,cg00112588	Body;TSS1500,Body;TSS1500	N_Shore,N_Shore	LOC100302401;RASAL2,LOC100302401;RASAL2	NR_027982;NM_170692,NR_027982;NM_170692	hyperM.iPSC
1	176722423	176722893	3	cg21033965,cg09938479,cg26915952	_,_	Island,Island,Island	_,_	_,_	hyperM.iPSC
1	176960514	176960520	2	cg06788278,cg10559803	TSS1500,TSS1500	N_Shore,N_Shore	RALGPS2,RALGPS2	NM_152663,NM_152663	hypoM.iPSC
1	177259629	177260866	3	cg10785394,cg10887069,cg01426743	_,TSS1500,TSS1500	N_Shore,N_Shore,N_Shore	_,FAM20B,FAM20B	_,NM_014864,NM_014864	hyperM.iPSC
1	177317027	177317296	2	cg04844495,cg27517652	TSS1500,TSS1500	N_Shore,N_Shore	TOR3A,TOR3A	NM_022371,NM_022371	hyperM.iPSC
1	177466047	177466562	3	cg13927605,cg18433086,cg04574732	TSS1500;TSS1500;TSS1500;TSS1500;TSS1500,TSS1500;TSS1500;TSS1500;TSS1500;TSS1500,TSS1500;TSS1500;TSS1500;TSS1500;TSS1500	S_Shore,S_Shore,S_Shore	ABL2;ABL2;ABL2;ABL2;ABL2,ABL2;ABL2;ABL2;ABL2;ABL2,ABL2;ABL2;ABL2;ABL2;ABL2	NM_007314;NM_001168236;NM_001168238;NM_001168237;NM_001136001,NM_007314;NM_001168236;NM_001168238;NM_001168237;NM_001136001,NM_007314;NM_001168236;NM_001168238;NM_001168237;NM_001136001	hyperM.iPSC
1	177786804	177787708	2	cg20746459,cg08037922	Body;Body;3'UTR,Body;Body;Body	_,_	C1orf125;C1orf125;NPHS2,C1orf125;C1orf125;NPHS2	NM_182766;NM_144696;NM_014625,NM_182766;NM_144696;NM_014625	hyperM.iPSC
1	177811099	177812081	3	cg26822551,cg24483554,cg23045073	Body,Body,TSS1500	N_Shore,N_Shore,S_Shore	NPHS2,NPHS2,NPHS2	NM_014625,NM_014625,NM_014625	hyperM.iPSC
1	177819764	177820411	2	cg13556934,cg23658362	_,_	N_Shelf,N_Shore	_,_	_,_	hyperM.iPSC
1	177823844	177824335	3	cg03986311,cg26328954,cg22623273	_,_	S_Shore,S_Shore,S_Shore	_,_	_,_	hyperM.iPSC
1	177826744	177828123	8	cg23627040,cg13848905,cg07901138,cg07171496,cg12277666,cg15545772,cg11853788,cg09656934	TSS1500,TSS1500,TSS1500,TSS1500,TSS200,5'UTR;1stExon,5'UTR,5'UTR	N_Shore,N_Shore,Island,Island,Island,Island,Island,Island	TDRD5,TDRD5,TDRD5,TDRD5,TDRD5,TDRD5;TDRD5,TDRD5,TDRD5	NM_173533,NM_173533,NM_173533,NM_173533,NM_173533,NM_173533;NM_173533,NM_173533,NM_173533	hyperM.iPSC
1	177963334	177963437	2	cg21295678,cg15209440	_,_	_,_	_,_	_,_	hyperM.iPSC
1	177978206	177978814	2	cg02634341,cg09683824	TSS1500,TSS200	N_Shore,Island	FAM163A,FAM163A	NM_173509,NM_173509	hyperM.iPSC
1	178051118	178051343	2	cg25369168,cg05392737	3'UTR,3'UTR	_,_	FAM163A,FAM163A	NM_173509,NM_173509	hyperM.iPSC
1	178468514	178468879	3	cg00838919,cg08647912,cg13877482	Body,Body,Body	Island,Island,Island	LHX4,LHX4,LHX4	NM_033343,NM_033343,NM_033343	hypoM.iPSC
1	179189259	179190470	7	cg17237951,cg27473416,cg00579423,cg03058232,cg22776392,cg14027288,cg18114294	_,_	N_Shore,Island,Island,Island,Island,Island,S_Shore	_,_	_,_	hyperM.iPSC
1	179269599	179269826	3	cg24441127,cg07025274,cg23037321	TSS200,TSS200,1stExon	_,_	MR1,MR1,MR1	NM_001531,NM_001531,NM_001531	hyperM.iPSC
1	179648914	179649557	4	cg02006095,cg24033491,cg13191195,cg25305993	_,_	Island,Island,Island,S_Shore	_,_	_,_	hyperM.iPSC
1	179720787	179721758	3	cg10573505,cg00304388,cg01363596	Body,Body,Body	N_Shore,N_Shore,Island	CACNA1E,CACNA1E,CACNA1E	NM_000721,NM_000721,NM_000721	hyperM.iPSC
1	179747255	179747471	2	cg09170397,cg06527919	Body,Body	_,_	CACNA1E,CACNA1E	NM_000721,NM_000721	hyperM.iPSC
1	180034232	180034397	3	cg02913918,cg25370753,cg16898334	Body,Body,Body	Island,Island,Island	CACNA1E,CACNA1E,CACNA1E	NM_000721,NM_000721,NM_000721	hyperM.iPSC
1	180291855	180294169	8	cg02494593,cg02960125,cg19866866,cg16306900,cg11478051,cg02670929,cg08918923,cg17936783	3'UTR,Body,Body,Body,Body,Body,5'UTR,5'UTR	N_Shore,Island,Island,Island,Island,S_Shore,S_Shore,S_Shore	ZNF648,ZNF648,ZNF648,ZNF648,ZNF648,ZNF648,ZNF648,ZNF648	NM_001009992,NM_001009992,NM_001009992,NM_001009992,NM_001009992,NM_001009992,NM_001009992,NM_001009992	hyperM.iPSC
1	180470767	180470814	2	cg06537131,cg15078825	_,_	_,_	_,_	_,_	hyperM.iPSC
1	180837797	180838776	2	cg05395321,cg06875985	Body,Body	N_Shelf,N_Shore	RGS16,RGS16	NM_002928,NM_002928	hyperM.iPSC
1	180839778	180840612	2	cg16824301,cg03517466	Body,TSS1500	N_Shore,S_Shore	RGS16,RGS16	NM_002928,NM_002928	hyperM.iPSC
1	181188283	181190373	7	cg26013028,cg26679785,cg01079738,cg02721693,cg00379090,cg26419869,cg05969496	Body,1stExon,1stExon;5'UTR,TSS200,TSS1500,TSS1500,TSS1500	N_Shore,Island,Island,S_Shore,S_Shore,S_Shore,S_Shore	C1orf14,C1orf14,C1orf14;C1orf14,C1orf14,C1orf14,C1orf14,C1orf14	NM_030933,NM_030933,NM_030933;NM_030933,NM_030933,NM_030933,NM_030933,NM_030933	hyperM.iPSC
1	181275363	181275970	2	cg17223218,cg12689670	Body,Body	_,_	LAMC1,LAMC1	NM_002293,NM_002293	hyperM.iPSC
1	181421679	181422267	3	cg05366923,cg06211724,cg23696949	TSS200;TSS200,1stExon;5'UTR;5'UTR;1stExon,Body;Body	_,_	LAMC2;LAMC2,LAMC2;LAMC2;LAMC2;LAMC2,LAMC2;LAMC2	NM_018891;NM_005562,NM_018891;NM_018891;NM_005562;NM_005562,NM_005562;NM_018891	hypoM.iPSC
1	181454056	181454920	2	cg01417625,cg08905629	Body;Body,Body;Body	_,_	LAMC2;LAMC2,LAMC2;LAMC2	NM_005562;NM_018891,NM_005562;NM_018891	hyperM.iPSC
1	181655355	181655788	2	cg15977933,cg18116641	TSS1500,TSS1500	S_Shore,S_Shore	NMNAT2,NMNAT2	NM_015039,NM_015039	hyperM.iPSC
1	181888007	181889093	3	cg04982190,cg20579480,cg19264170	5'UTR;5'UTR,5'UTR;5'UTR,TSS200;5'UTR	_,_	APOBEC4;RGL1,APOBEC4;RGL1,APOBEC4;RGL1	NM_203454;NM_015149,NM_203454;NM_015149,NM_203454;NM_015149	hyperM.iPSC
1	182273556	182273595	2	cg00044463,cg02314308	TSS200,TSS200	S_Shore,S_Shore	GLT25D2,GLT25D2	NM_015101,NM_015101	hyperM.iPSC
1	182621648	182621842	2	cg17872799,cg12550731	TSS1500,TSS1500	N_Shore,N_Shore	C1orf21,C1orf21	NM_030806,NM_030806	hypoM.iPSC
1	183280281	183280887	4	cg16597665,cg17927730,cg11320084,cg26542888	TSS1500,TSS1500,TSS1500,TSS1500	N_Shore,N_Shore,N_Shore,N_Shore	RNF2,RNF2,RNF2,RNF2	NM_007212,NM_007212,NM_007212,NM_007212	hyperM.iPSC
1	184917064	184917102	2	cg25147026,cg16101346	TSS1500,TSS1500	S_Shore,S_Shore	PTGS2,PTGS2	NM_000963,NM_000963	hyperM.iPSC
1	189967832	189968480	3	cg23166787,cg10898367,cg15691976	_,_	_,_	_,_	_,_	hyperM.iPSC
1	191340317	191342263	4	cg24881113,cg08544041,cg15361231,cg09182724	Body;Body,Body;Body,1stExon;TSS1500;5'UTR,TSS1500;TSS1500	N_Shore,Island,S_Shore,S_Shore	GLRX2;GLRX2,GLRX2;GLRX2,GLRX2;GLRX2;GLRX2,GLRX2;GLRX2	NM_016066;NM_197962,NM_016066;NM_197962,NM_016066;NM_197962;NM_016066,NM_016066;NM_197962	hyperM.iPSC
1	191356973	191357280	2	cg19600670,cg25921910	TSS1500,TSS1500	N_Shore,N_Shore	CDC73,CDC73	NM_024529,NM_024529	hyperM.iPSC
1	191421831	191423057	4	cg12859046,cg16608652,cg00725635,cg07569020	5'UTR;1stExon;Body,5'UTR;1stExon;Body,TSS200;Body,TSS1500;Body	_,_	B3GALT2;B3GALT2;CDC73,B3GALT2;B3GALT2;CDC73,B3GALT2;CDC73,B3GALT2;CDC73	NM_003783;NM_003783;NM_024529,NM_003783;NM_003783;NM_024529,NM_003783;NM_024529,NM_003783;NM_024529	hyperM.iPSC
1	195212153	195213135	3	cg25840094,cg21475781,cg13682187	TSS1500,TSS1500,TSS200	_,_	CFHR5,CFHR5,CFHR5	NM_030787,NM_030787,NM_030787	hyperM.iPSC
1	195503742	195503880	2	cg13940125,cg01258789	TSS1500,TSS200	_,_	CRB1,CRB1	NM_201253,NM_201253	hyperM.iPSC
1	196157102	196157231	2	cg12434982,cg22443762	Body;Body,Body;Body	Island,Island	LHX9;LHX9,LHX9;LHX9	NM_020204;NM_001014434,NM_020204;NM_001014434	hypoM.iPSC
1	196164840	196164852	2	cg08128826,cg04868078	Body;Body,Body;Body	_,_	LHX9;LHX9,LHX9;LHX9	NM_020204;NM_001014434,NM_020204;NM_001014434	hypoM.iPSC
1	197094780	197094832	2	cg25349643,cg26160460	TSS200,TSS200;Body	_,_	MIR181B1,MIR181B1;MIR181A1	NR_029612,NR_029612;NR_029626	hyperM.iPSC
1	198271842	198272870	4	cg07208853,cg19713947,cg07926895,cg13229857	Body;Body,Body;Body,Body;Body,Body;Body	S_Shore,S_Shore,S_Shore,S_Shore	NR5A2;NR5A2,NR5A2;NR5A2,NR5A2;NR5A2,NR5A2;NR5A2	NM_205860;NM_003822,NM_205860;NM_003822,NM_205860;NM_003822,NM_205860;NM_003822	hypoM.iPSC
1	198274026	198274486	3	cg04605987,cg04308769,cg21851672	Body;Body,Body;Body,Body;Body	N_Shore,N_Shore,N_Shore	NR5A2;NR5A2,NR5A2;NR5A2,NR5A2;NR5A2	NM_205860;NM_003822,NM_205860;NM_003822,NM_205860;NM_003822	hypoM.iPSC
1	198277331	198277896	2	cg17520027,cg02457750	Body;Body,Body;Body	Island,N_Shore	NR5A2;NR5A2,NR5A2;NR5A2	NM_205860;NM_003822,NM_205860;NM_003822	hypoM.iPSC
1	198537830	198538838	3	cg07046575,cg22810423,cg07138399	_,_	N_Shore,S_Shore,S_Shore	_,_	_,_	hyperM.iPSC
1	199108567	199109779	7	cg24550456,cg01711322,cg19940077,cg21870884,cg15892784,cg13300273,cg26048025	TSS1500,TSS200,1stExon,1stExon,1stExon,1stExon,1stExon	N_Shore,N_Shore,Island,Island,Island,Island,Island	GPR25,GPR25,GPR25,GPR25,GPR25,GPR25,GPR25	NM_005298,NM_005298,NM_005298,NM_005298,NM_005298,NM_005298,NM_005298	hyperM.iPSC
1	199127877	199128220	2	cg06854264,cg16409409	Body,Body	S_Shore,S_Shore	C1orf106,C1orf106	NM_018265,NM_018265	hypoM.iPSC
1	199152359	199153040	2	cg10894991,cg13930047	_,_	_,_	_,_	_,_	hyperM.iPSC
1	199241785	199241914	2	cg12857074,cg25969983	Body,Body	_,_	KIF21B,KIF21B	NM_017596,NM_017596	hyperM.iPSC
1	199256870	199257105	2	cg17889623,cg27386431	Body,Body	N_Shelf,N_Shore	KIF21B,KIF21B	NM_017596,NM_017596	hypoM.iPSC
1	199259692	199260332	4	cg04860852,cg12587954,cg21218687,cg26252592	TSS1500,TSS1500,TSS1500,TSS1500	S_Shore,S_Shore,S_Shore,S_Shore	KIF21B,KIF21B,KIF21B,KIF21B	NM_017596,NM_017596,NM_017596,NM_017596	hypoM.iPSC
1	199390517	199390648	4	cg09554300,cg05391486,cg23929317,cg21431091	TSS1500,TSS1500,TSS1500,TSS1500	S_Shore,S_Shore,S_Shore,S_Shore	TMEM9,TMEM9,TMEM9,TMEM9	NM_016456,NM_016456,NM_016456,NM_016456	hyperM.iPSC
1	199426308	199426611	2	cg02897824,cg00165631	TSS1500,1stExon;5'UTR	_,_	IGFN1,IGFN1;IGFN1	NM_001164586,NM_001164586;NM_001164586	hyperM.iPSC
1	199461836	199462770	2	cg00578673,cg04258973	Body,Body	N_Shore,Island	IGFN1,IGFN1	NM_001164586,NM_001164586	hyperM.iPSC
1	199518823	199520594	12	cg12611449,cg02855983,cg08872722,cg17463149,cg19570545,cg09279512,cg09472802,cg22606205,cg20869257,cg09009380,cg27571196,cg04904030	TSS1500;TSS1500,TSS1500;TSS1500,TSS1500;TSS1500,TSS200;TSS200,TSS200;TSS200,TSS200;TSS200,5'UTR;5'UTR;1stExon;1stExon,5'UTR;5'UTR;1stExon;1stExon,1stExon;1stExon,1stExon;1stExon,Body;Body,Body;Body	N_Shore,N_Shore,N_Shore,Island,Island,Island,Island,Island,Island,Island,Island,S_Shore	PKP1;PKP1,PKP1;PKP1,PKP1;PKP1,PKP1;PKP1,PKP1;PKP1,PKP1;PKP1,PKP1;PKP1;PKP1;PKP1,PKP1;PKP1;PKP1;PKP1,PKP1;PKP1,PKP1;PKP1,PKP1;PKP1,PKP1;PKP1	NM_000299;NM_001005337,NM_000299;NM_001005337,NM_000299;NM_001005337,NM_000299;NM_001005337,NM_000299;NM_001005337,NM_000299;NM_001005337,NM_001005337;NM_000299;NM_000299;NM_001005337,NM_001005337;NM_000299;NM_000299;NM_001005337,NM_000299;NM_001005337,NM_000299;NM_001005337,NM_000299;NM_001005337,NM_000299;NM_001005337	hyperM.iPSC
1	199614173	199614540	2	cg24249973,cg07596645	TSS1500;TSS1500;TSS1500;TSS1500,TSS1500;TSS1500;TSS1500;TSS1500	_,_	TNNT2;TNNT2;TNNT2;TNNT2,TNNT2;TNNT2;TNNT2;TNNT2	NM_001001431;NM_001001430;NM_001001432;NM_000364,NM_001001431;NM_001001430;NM_001001432;NM_000364	hyperM.iPSC
1	199635414	199635654	3	cg21964551,cg23291161,cg26539023	TSS200,TSS1500,TSS1500	Island,Island,Island	LAD1,LAD1,LAD1	NM_005558,NM_005558,NM_005558	hypoM.iPSC
1	199656829	199658370	5	cg13435855,cg12114524,cg09582482,cg07236127,cg13172153	5'UTR,5'UTR,1stExon;5'UTR,TSS1500,TSS1500	_,_	TNNI1,TNNI1,TNNI1;TNNI1,TNNI1,TNNI1	NM_003281,NM_003281,NM_003281;NM_003281,NM_003281,NM_003281	hyperM.iPSC
1	199692613	199692913	2	cg02897366,cg25361506	_,_	_,_	_,_	_,_	hyperM.iPSC
1	199742428	199743242	2	cg04772818,cg24155190	5'UTR;5'UTR,TSS1500;TSS1500	N_Shore,S_Shore	CSRP1;CSRP1,CSRP1;CSRP1	NM_004078;NM_001144773,NM_001144773;NM_004078	hyperM.iPSC
1	199975145	199976298	5	cg27441486,cg14168733,cg13877974,cg05091570,cg18539461	TSS1500;Body,TSS1500;Body,TSS200;Body,Body;Body,Body;Body	N_Shore,N_Shore,Island,Island,S_Shore	NAV1;NAV1,NAV1;NAV1,NAV1;NAV1,NAV1;NAV1,NAV1;NAV1	NM_001167738;NM_020443,NM_001167738;NM_020443,NM_001167738;NM_020443,NM_001167738;NM_020443,NM_001167738;NM_020443	hypoM.iPSC
1	200123386	200123497	2	cg01602166,cg07592358	TSS1500;TSS1500,TSS1500;TSS1500	_,_	SHISA4;SHISA4,SHISA4;SHISA4	NM_198149;NR_030775,NM_198149;NR_030775	hyperM.iPSC
1	200245594	200246561	6	cg25742464,cg26808687,cg05653018,cg16986578,cg26328757,cg02076020	TSS1500;TSS1500,TSS200;TSS200,TSS200;TSS200,TSS200;TSS200,5'UTR;5'UTR;1stExon;1stExon,5'UTR;5'UTR;1stExon	_,_	ELF3;ELF3,ELF3;ELF3,ELF3;ELF3,ELF3;ELF3,ELF3;ELF3;ELF3;ELF3,ELF3;ELF3;ELF3	NM_004433;NM_001114309,NM_004433;NM_001114309,NM_004433;NM_001114309,NM_004433;NM_001114309,NM_004433;NM_001114309;NM_004433;NM_001114309,NM_004433;NM_001114309;NM_001114309	hypoM.iPSC
1	200342169	200343115	2	cg22851694,cg04896437	_,_	_,_	_,_	_,_	hyperM.iPSC
1	200357472	200358919	8	cg10399484,cg27450557,cg00921097,cg13300939,cg08129759,cg27313021,cg15096829,cg16257215	TSS1500,TSS1500,TSS1500,TSS200,TSS200,TSS200,TSS200,1stExon	_,_	GPR37L1,GPR37L1,GPR37L1,GPR37L1,GPR37L1,GPR37L1,GPR37L1,GPR37L1	NM_004767,NM_004767,NM_004767,NM_004767,NM_004767,NM_004767,NM_004767,NM_004767	hyperM.iPSC
1	200396967	200397315	2	cg01437204,cg25754958	TSS1500;TSS1500,TSS1500	_,_	PTPN7;PTPN7,PTPN7	NM_080588;NM_002832,NM_002832	hyperM.iPSC
1	200438346	200439158	2	cg12761421,cg09684336	Body;TSS1500,Body;TSS1500	_,_	LGR6;LGR6,LGR6;LGR6	NM_001017403;NM_021636,NM_001017403;NM_021636	hyperM.iPSC
1	200553862	200554469	2	cg20163796,cg10712554	Body;Body;Body,Body;Body;Body	_,_	LGR6;LGR6;LGR6,LGR6;LGR6;LGR6	NM_021636;NM_001017404;NM_001017403,NM_021636;NM_001017404;NM_001017403	hyperM.iPSC
1	200577447	200577901	4	cg02926368,cg16993579,cg13395333,cg15173196	5'UTR,1stExon;5'UTR,TSS200,TSS200	N_Shore,Island,Island,Island	UBE2T,UBE2T;UBE2T,UBE2T,UBE2T	NM_014176,NM_014176;NM_014176,NM_014176,NM_014176	hyperM.iPSC
1	201125314	201125449	3	cg18277005,cg21208943,cg08534181	TSS1500,TSS1500,TSS1500	S_Shore,S_Shore,S_Shore	RABIF,RABIF,RABIF	NM_002871,NM_002871,NM_002871	hyperM.iPSC
1	201287240	201287283	2	cg10952234,cg24000087	5'UTR;1stExon,5'UTR;1stExon	_,_	PPFIA4;PPFIA4,PPFIA4;PPFIA4	NM_015053;NM_015053,NM_015053;NM_015053	hyperM.iPSC
1	201318095	201319046	2	cg25683570,cg04395153	_,3'UTR	_,_	_,MYOG	_,NM_002479	hyperM.iPSC
1	201322045	201322130	3	cg10901806,cg19251719,cg23098069	TSS200,TSS200,TSS200	_,_	MYOG,MYOG,MYOG	NM_002479,NM_002479,NM_002479	hyperM.iPSC
1	201362671	201363306	3	cg11341981,cg07232945,cg03547181	TSS1500;TSS1500,TSS1500;TSS1500,TSS200;TSS200	N_Shore,N_Shore,N_Shore	ADORA1;ADORA1,ADORA1;ADORA1,ADORA1;ADORA1	NM_000674;NM_001048230,NM_000674;NM_001048230,NM_000674;NM_001048230	hyperM.iPSC
1	201422561	201423387	2	cg14085262,cg13134650	TSS200,TSS1500	_,_	CHI3L1,CHI3L1	NM_001276,NM_001276	hyperM.iPSC
1	201465646	201466456	2	cg25705508,cg11852149	TSS200,TSS1500	_,_	CHIT1,CHIT1	NM_003465,NM_003465	hyperM.iPSC
1	201508573	201508645	2	cg04420275,cg21933812	_,_	N_Shore,N_Shore	_,_	_,_	hyperM.iPSC
1	201539772	201540757	3	cg02254181,cg00567854,cg00860712	_,TSS1500,TSS1500	N_Shore,N_Shore,N_Shore	_,BTG2,BTG2	_,NM_006763,NM_006763	hyperM.iPSC
1	201586813	201587164	5	cg04704856,cg03764585,cg26987645,cg16289210,cg27387030	1stExon;5'UTR,1stExon;5'UTR,TSS200,TSS200,TSS1500	_,_	FMOD;FMOD,FMOD;FMOD,FMOD,FMOD,FMOD	NM_002023;NM_002023,NM_002023;NM_002023,NM_002023,NM_002023,NM_002023	hyperM.iPSC
1	201731700	201731984	2	cg23031141,cg04830316	5'UTR,Body	_,_	OPTC,OPTC	NM_014359,NM_014359	hyperM.iPSC
1	201861671	201861768	3	cg06637618,cg21693907,cg17039022	TSS1500;TSS1500,TSS1500;TSS1500,TSS1500;TSS1500	N_Shelf,N_Shelf,N_Shelf	ATP2B4;ATP2B4,ATP2B4;ATP2B4,ATP2B4;ATP2B4	NM_001001396;NM_001684,NM_001001396;NM_001684,NM_001001396;NM_001684	hyperM.iPSC
1	201909707	201910369	2	cg22367549,cg19087104	5'UTR;5'UTR,5'UTR;5'UTR	_,_	ATP2B4;ATP2B4,ATP2B4;ATP2B4	NM_001001396;NM_001684,NM_001001396;NM_001684	hyperM.iPSC
1	202000879	202001182	4	cg10117369,cg17711527,cg12022621,cg00942920	TSS200;TSS200,1stExon;1stExon;5'UTR;5'UTR,1stExon;1stExon;5'UTR,Body;1stExon;5'UTR	_,_	LAX1;LAX1,LAX1;LAX1;LAX1;LAX1,LAX1;LAX1;LAX1,LAX1;LAX1;LAX1	NM_017773;NM_001136190,NM_017773;NM_001136190;NM_001136190;NM_017773,NM_017773;NM_001136190;NM_017773,NM_001136190;NM_017773;NM_017773	hyperM.iPSC
1	202034195	202035140	3	cg06521359,cg04498511,cg04902405	5'UTR,5'UTR,5'UTR	S_Shelf,S_Shelf,S_Shelf	ZC3H11A,ZC3H11A,ZC3H11A	NM_014827,NM_014827,NM_014827	hyperM.iPSC
1	202096104	202096513	3	cg23035341,cg06642677,cg15481791	TSS1500,TSS1500,TSS1500	N_Shore,N_Shore,N_Shore	SNRPE,SNRPE,SNRPE	NM_003094,NM_003094,NM_003094	hyperM.iPSC
1	202277262	202278084	3	cg19366877,cg16290101,cg01980854	TSS1500,TSS1500,TSS1500	_,_	C1orf157,C1orf157,C1orf157	NR_027902,NR_027902,NR_027902	hyperM.iPSC
1	202401866	202402208	2	cg05556020,cg21537214	Body,TSS200	_,_	REN,REN	NM_000537,NM_000537	hyperM.iPSC
1	202426242	202426352	2	cg12731349,cg23788856	Body,Body	Island,Island	KISS1,KISS1	NM_002256,NM_002256	hypoM.iPSC
1	202493189	202493364	2	cg17108388,cg02491234	Body,Body	Island,Island	PLEKHA6,PLEKHA6	NM_014935,NM_014935	hyperM.iPSC
1	202567901	202567973	2	cg10094886,cg07010486	5'UTR,5'UTR	_,_	PLEKHA6,PLEKHA6	NM_014935,NM_014935	hyperM.iPSC
1	202595781	202595845	2	cg24864241,cg26895569	TSS200,TSS200	_,_	PLEKHA6,PLEKHA6	NM_014935,NM_014935	hyperM.iPSC
1	202605640	202606929	3	cg24321036,cg18316735,cg12486614	TSS200,TSS1500,TSS1500	_,_	LOC127841,LOC127841,LOC127841	NR_027022,NR_027022,NR_027022	hyperM.iPSC
1	202921867	202922001	2	cg17112828,cg16456919	TSS1500;TSS1500,TSS1500;TSS1500	S_Shore,S_Shore	LRRN2;LRRN2,LRRN2;LRRN2	NM_201630;NM_006338,NM_201630;NM_006338	hyperM.iPSC
1	203232820	203232858	3	cg17947172,cg04862289,cg17449235	Body;Body;Body;Body,Body;Body;Body;Body,Body;Body;Body;Body	_,_	NFASC;NFASC;NFASC;NFASC,NFASC;NFASC;NFASC;NFASC,NFASC;NFASC;NFASC;NFASC	NM_001005388;NM_001160331;NM_015090;NM_001160332,NM_001005388;NM_001160331;NM_015090;NM_001160332,NM_001005388;NM_001160331;NM_015090;NM_001160332	hyperM.iPSC
1	203277850	203278529	3	cg19917714,cg03537215,cg06906555	TSS1500,TSS1500,TSS1500	_,_	CNTN2,CNTN2,CNTN2	NM_005076,NM_005076,NM_005076	hyperM.iPSC
1	203304931	203305410	3	cg01537455,cg01243924,cg06617202	Body,Body,Body	N_Shore,Island,Island	CNTN2,CNTN2,CNTN2	NM_005076,NM_005076,NM_005076	hyperM.iPSC
1	203477322	203477576	3	cg14599015,cg02237875,cg18930928	Body,Body,Body	Island,Island,S_Shore	TMCC2,TMCC2,TMCC2	NM_014858,NM_014858,NM_014858	hyperM.iPSC
1	203583655	203584151	2	cg09319656,cg11841127	5'UTR,5'UTR	S_Shelf,S_Shelf	KLHDC8A,KLHDC8A	NM_018203,NM_018203	hyperM.iPSC
1	203592482	203593060	4	cg27529555,cg21996351,cg08159989,cg13459217	5'UTR;1stExon,TSS200,TSS200,TSS1500	_,_	KLHDC8A;KLHDC8A,KLHDC8A,KLHDC8A,KLHDC8A	NM_018203;NM_018203,NM_018203,NM_018203,NM_018203	hyperM.iPSC
1	203607702	203607928	2	cg23266398,cg18240528	_,_	_,_	_,_	_,_	hyperM.iPSC
1	203608973	203609757	2	cg18759595,cg07342108	_,_	_,_	_,_	_,_	hyperM.iPSC
1	203666354	203666820	4	cg11980944,cg24339193,cg06849719,cg06968878	_,_	_,_	_,_	_,_	hyperM.iPSC
1	203684059	203684901	3	cg02999711,cg25202407,cg02520707	Body,TSS200,TSS1500	_,_	MIR135B,MIR135B,MIR135B	NR_029893,NR_029893,NR_029893	hypoM.iPSC
1	203689060	203690414	3	cg12656740,cg00466402,cg19503168	_,_	N_Shelf,N_Shore,N_Shore	_,_	_,_	hyperM.iPSC
1	203756732	203756830	2	cg19098785,cg18141973	5'UTR;5'UTR;5'UTR,5'UTR;5'UTR;5'UTR	_,_	CDK18;CDK18;CDK18,CDK18;CDK18;CDK18	NM_002596;NM_212503;NM_212502,NM_002596;NM_212503;NM_212502	hyperM.iPSC
1	203758041	203758164	3	cg15098085,cg18320737,cg01720722	5'UTR;5'UTR;5'UTR,5'UTR;5'UTR;5'UTR,5'UTR;5'UTR;5'UTR	_,_	CDK18;CDK18;CDK18,CDK18;CDK18;CDK18,CDK18;CDK18;CDK18	NM_002596;NM_212503;NM_212502,NM_002596;NM_212503;NM_212502,NM_002596;NM_212503;NM_212502	hyperM.iPSC
1	203764627	203765978	4	cg07571022,cg06419732,cg07008784,cg26400546	Body;Body;Body,Body;Body;Body,Body;Body;Body,Body;Body;Body	Island,Island,Island,S_Shore	CDK18;CDK18;CDK18,CDK18;CDK18;CDK18,CDK18;CDK18;CDK18,CDK18;CDK18;CDK18	NM_002596;NM_212502;NM_212503,NM_002596;NM_212502;NM_212503,NM_002596;NM_212502;NM_212503,NM_002596;NM_212502;NM_212503	hyperM.iPSC
1	203803444	203804460	4	cg04198912,cg26533350,cg07121199,cg03585778	TSS1500,TSS1500,TSS1500,TSS1500	N_Shore,N_Shore,Island,Island	MFSD4,MFSD4,MFSD4,MFSD4	NM_181644,NM_181644,NM_181644,NM_181644	hyperM.iPSC
1	203816771	203817292	2	cg16035777,cg25600410	Body,Body	_,_	MFSD4,MFSD4	NM_181644,NM_181644	hyperM.iPSC
1	203827620	203828429	2	cg04740665,cg12481266	Body,Body	N_Shore,S_Shore	MFSD4,MFSD4	NM_181644,NM_181644	hyperM.iPSC
1	203828024	203828529	2	cg06740296,cg00855731	Body,Body	Island,S_Shore	MFSD4,MFSD4	NM_181644,NM_181644	hypoM.iPSC
1	203868736	203869691	4	cg23201841,cg26245202,cg19028997,cg25611443	TSS200;TSS200,TSS1500;TSS1500,TSS1500;TSS1500,TSS1500;TSS1500	S_Shore,S_Shore,S_Shore,S_Shore	ELK4;ELK4,ELK4;ELK4,ELK4;ELK4,ELK4;ELK4	NM_021795;NM_001973,NM_001973;NM_021795,NM_001973;NM_021795,NM_001973;NM_021795	hyperM.iPSC
1	203897707	203898724	4	cg26894854,cg27568165,cg12178904,cg14084826	Body,Body,Body,Body	N_Shore,Island,Island,Island	SLC45A3,SLC45A3,SLC45A3,SLC45A3	NM_033102,NM_033102,NM_033102,NM_033102	hyperM.iPSC
1	204009967	204010138	2	cg16031515,cg26418147	Body;Body;Body;5'UTR,Body;Body;Body;5'UTR	N_Shore,N_Shore	RAB7L1;RAB7L1;RAB7L1;RAB7L1,RAB7L1;RAB7L1;RAB7L1;RAB7L1	NM_001135663;NM_001135662;NM_003929;NM_001135664,NM_001135663;NM_001135662;NM_003929;NM_001135664	hypoM.iPSC
1	204046656	204047535	2	cg00762738,cg10717869	5'UTR,5'UTR	N_Shore,N_Shore	SLC41A1,SLC41A1	NM_173854,NM_173854	hyperM.iPSC
1	204085107	204086086	6	cg03461704,cg26354017,cg14159672,cg14893161,cg11965913,cg07167872	Body,1stExon,1stExon,5'UTR;1stExon,TSS200,TSS200	N_Shore,Island,Island,S_Shore,S_Shore,S_Shore	PM20D1,PM20D1,PM20D1,PM20D1;PM20D1,PM20D1,PM20D1	NM_152491,NM_152491,NM_152491,NM_152491;NM_152491,NM_152491,NM_152491	hyperM.iPSC
1	204163782	204163788	2	cg06437052,cg22863880	Body;Body;5'UTR;1stExon,Body;Body;5'UTR;1stExon	_,_	SLC26A9;SLC26A9;SLC26A9;SLC26A9,SLC26A9;SLC26A9;SLC26A9;SLC26A9	NM_052934;NM_134325;NM_001142600;NM_001142600,NM_052934;NM_134325;NM_001142600;NM_001142600	hyperM.iPSC
1	204179269	204180482	5	cg09852221,cg04292976,cg13172432,cg21828629,cg02912371	TSS200;TSS200,TSS1500;TSS1500,TSS1500;TSS1500,TSS1500;TSS1500,TSS1500;TSS1500	_,_	SLC26A9;SLC26A9,SLC26A9;SLC26A9,SLC26A9;SLC26A9,SLC26A9;SLC26A9,SLC26A9;SLC26A9	NM_052934;NM_134325,NM_052934;NM_134325,NM_052934;NM_134325,NM_052934;NM_134325,NM_052934;NM_134325	hyperM.iPSC
1	204390076	204390122	2	cg27169129,cg10818339	TSS1500,TSS1500	N_Shore,N_Shore	AVPR1B,AVPR1B	NM_000707,NM_000707	hypoM.iPSC
1	204392632	204393417	2	cg15677434,cg20295214	Body,Body	S_Shore,S_Shelf	AVPR1B,AVPR1B	NM_000707,NM_000707	hyperM.iPSC
1	204709924	204710000	3	cg16619193,cg26859016,cg20530056	TSS1500,TSS1500,TSS1500	_,_	IKBKE,IKBKE,IKBKE	NM_014002,NM_014002,NM_014002	hyperM.iPSC
1	204746582	204747082	3	cg16122716,cg17558126,cg16032102	TSS1500;TSS1500,TSS1500;TSS1500,TSS1500;TSS1500	N_Shore,Island,Island	RASSF5;RASSF5,RASSF5;RASSF5,RASSF5;RASSF5	NM_182664;NM_182663,NM_182664;NM_182663,NM_182664;NM_182663	hypoM.iPSC
1	205037818	205038885	5	cg12380764,cg07175580,cg20998511,cg11582579,cg05916196	TSS1500,TSS1500,TSS200,TSS200,1stExon	_,_	IL19,IL19,IL19,IL19,IL19	NM_153758,NM_153758,NM_153758,NM_153758,NM_153758	hyperM.iPSC
1	205161776	205162291	4	cg06640279,cg15158847,cg24107163,cg17460386	Body;Body;Body,5'UTR;5'UTR;1stExon;1stExon;5'UTR,5'UTR;5'UTR;1stExon;1stExon;5'UTR,5'UTR;TSS1500;TSS1500	_,_	FAIM3;FAIM3;FAIM3,FAIM3;FAIM3;FAIM3;FAIM3;FAIM3,FAIM3;FAIM3;FAIM3;FAIM3;FAIM3,FAIM3;FAIM3;FAIM3	NM_001142473;NM_001142472;NM_005449,NM_001142472;NM_005449;NM_001142473;NM_005449;NM_001142473,NM_001142472;NM_005449;NM_001142473;NM_005449;NM_001142473,NM_001142472;NM_005449;NM_001142473	hyperM.iPSC
1	205186407	205187251	4	cg02105856,cg12751565,cg00961792,cg01965508	5'UTR;1stExon,TSS200,TSS1500,TSS1500	_,_	PIGR;PIGR,PIGR,PIGR,PIGR	NM_002644;NM_002644,NM_002644,NM_002644,NM_002644	hyperM.iPSC
1	205207494	205207550	2	cg15565057,cg21115691	Body;Body;Body;Body,Body;Body;Body;Body	_,_	FCAMR;FCAMR;FCAMR;FCAMR,FCAMR;FCAMR;FCAMR;FCAMR	NM_001122980;NM_001122979;NM_032029;NM_001170631,NM_001122980;NM_001122979;NM_032029;NM_001170631	hyperM.iPSC
1	205291363	205291751	2	cg05398095,cg02710090	TSS1500,TSS1500;TSS1500;TSS1500	N_Shore,N_Shore	YOD1,PFKFB2;PFKFB2;YOD1	NM_018566,NM_001018053;NM_006212;NM_018566	hyperM.iPSC
1	205655621	205655629	2	cg24376548,cg24834575	_,_	_,_	_,_	_,_	hyperM.iPSC
1	205692837	205693009	3	cg07573078,cg23605027,cg10109747	TSS1500;TSS1500,TSS1500;TSS1500,TSS1500;TSS1500	N_Shore,N_Shore,N_Shore	CR2;CR2,CR2;CR2,CR2;CR2	NM_001006658;NM_001877,NM_001006658;NM_001877,NM_001006658;NM_001877	hyperM.iPSC
1	205709561	205709765	2	cg17504886,cg26858300	Body;Body,Body;Body	_,_	CR2;CR2,CR2;CR2	NM_001006658;NM_001877,NM_001006658;NM_001877	hyperM.iPSC
1	205885441	205885516	2	cg06917617,cg00228891	Body,Body	Island,Island	CR1L,CR1L	NM_175710,NM_175710	hyperM.iPSC
1	206041805	206041887	2	cg06852461,cg22159815	_,Body	_,_	_,MIR29C	_,NR_029832	hyperM.iPSC
1	206043665	206043863	2	cg22525895,cg03446399	TSS1500,TSS1500	_,_	MIR29B2,MIR29B2	NR_029518,NR_029518	hyperM.iPSC
1	206059026	206059171	3	cg24507760,cg22785852,cg22714290	Body,Body,Body	_,_	LOC148696,LOC148696,LOC148696	NR_026817,NR_026817,NR_026817	hyperM.iPSC
1	206106826	206106876	2	cg00085493,cg24315421	_,_	N_Shore,N_Shore	_,_	_,_	hyperM.iPSC
1	206150536	206152078	6	cg04197452,cg03990033,cg16291276,cg20293352,cg26266618,cg02852407	Body;Body,Body;Body,Body;Body,TSS1500;TSS1500,TSS1500;TSS1500,TSS1500;TSS1500	N_Shore,N_Shore,N_Shore,S_Shore,S_Shore,S_Shore	CD34;CD34,CD34;CD34,CD34;CD34,CD34;CD34,CD34;CD34,CD34;CD34	NM_001025109;NM_001773,NM_001025109;NM_001773,NM_001025109;NM_001773,NM_001773;NM_001025109,NM_001773;NM_001025109,NM_001773;NM_001025109	hyperM.iPSC
1	207448240	207448400	2	cg09117778,cg17082959	_,_	_,_	_,_	_,_	hyperM.iPSC
1	207470409	207470500	2	ch.1.207470409R,ch.1.207470500F	_,_	N_Shore,N_Shore	_,_	_,_	hyperM.iPSC
1	207471673	207472686	3	cg11379081,cg00563824,cg15817705	_,_	Island,Island,S_Shore	_,_	_,_	hyperM.iPSC
1	207594158	207594204	2	cg24997231,cg06155620	_,_	_,_	_,_	_,_	hyperM.iPSC
1	207637572	207638512	2	cg22787719,cg12697139	_,_	_,_	_,_	_,_	hyperM.iPSC
1	207865344	207865976	2	cg05812804,cg26294229	Body;Body;Body,Body;Body;Body	N_Shore,Island	LAMB3;LAMB3;LAMB3,LAMB3;LAMB3;LAMB3	NM_001017402;NM_001127641;NM_000228,NM_001017402;NM_001127641;NM_000228	hyperM.iPSC
1	207892566	207893486	2	cg04873061,cg03967293	TSS200;TSS1500;TSS1500,TSS1500;TSS1500	_,_	LAMB3;LAMB3;LAMB3,LAMB3;LAMB3	NM_000228;NM_001127641;NM_001017402,NM_001127641;NM_000228	hyperM.iPSC
1	207943460	207944801	5	cg16897216,cg13781869,cg26880525,cg09366519,cg20941184	5'UTR;TSS1500,5'UTR;TSS1500,5'UTR;TSS1500,5'UTR;TSS1500,5'UTR;TSS200	_,_	HSD11B1;HSD11B1,HSD11B1;HSD11B1,HSD11B1;HSD11B1,HSD11B1;HSD11B1,HSD11B1;HSD11B1	NM_181755;NM_005525,NM_181755;NM_005525,NM_181755;NM_005525,NM_181755;NM_005525,NM_181755;NM_005525	hyperM.iPSC
1	207987719	207988200	2	cg26758551,cg12074024	_,_	Island,S_Shore	_,_	_,_	hypoM.iPSC
1	207995149	207996750	6	cg19099296,cg08655071,cg20694619,cg22436753,cg01997629,cg00450164	TSS1500,TSS1500,TSS200,1stExon;5'UTR,1stExon;5'UTR,5'UTR	_,_	TRAF3IP3,TRAF3IP3,TRAF3IP3,TRAF3IP3;TRAF3IP3,TRAF3IP3;TRAF3IP3,TRAF3IP3	NM_025228,NM_025228,NM_025228,NM_025228;NM_025228,NM_025228;NM_025228,NM_025228	hyperM.iPSC
1	208023188	208023573	2	cg00638574,cg03450180	Body,Body	N_Shore,N_Shore	C1orf74,C1orf74	NM_152485,NM_152485	hyperM.iPSC
1	208066881	208067506	2	cg04238303,cg05968010	TSS1500,TSS1500	N_Shore,N_Shore	C1orf107,C1orf107	NM_014388,NM_014388	hyperM.iPSC
1	208476950	208477687	2	cg04839207,cg11071682	5'UTR,5'UTR	S_Shelf,S_Shelf	SERTAD4,SERTAD4	NM_019605,NM_019605	hyperM.iPSC
1	208492475	208492981	3	cg18272538,cg16658180,cg10717691	_,_	_,_	_,_	_,_	hypoM.iPSC
1	208532834	208533095	2	cg27185504,cg09074223	_,_	Island,S_Shore	_,_	_,_	hyperM.iPSC
1	208567991	208568257	3	cg25734421,cg22332066,cg03893872	TSS1500;TSS1500;TSS1500;TSS1500;TSS1500;TSS1500,TSS1500;TSS1500;1stExon;5'UTR;TSS1500;1stExon;5'UTR;TSS1500,TSS1500;TSS1500;1stExon;5'UTR;TSS1500;1stExon;5'UTR;TSS1500	N_Shore,N_Shore,N_Shore	HHAT;HHAT;HHAT;HHAT;HHAT;HHAT,HHAT;HHAT;HHAT;HHAT;HHAT;HHAT;HHAT;HHAT,HHAT;HHAT;HHAT;HHAT;HHAT;HHAT;HHAT;HHAT	NM_001170580;NM_018194;NM_001122834;NM_001170588;NM_001170564;NM_001170587,NM_001170580;NM_018194;NM_001170564;NM_001170564;NM_001170588;NM_001122834;NM_001122834;NM_001170587,NM_001170580;NM_018194;NM_001170564;NM_001170564;NM_001170588;NM_001122834;NM_001122834;NM_001170587	hyperM.iPSC
1	208921666	208922531	2	cg20627744,cg04853978	3'UTR;3'UTR,3'UTR;3'UTR	N_Shelf,N_Shore	KCNH1;KCNH1,KCNH1;KCNH1	NM_172362;NM_002238,NM_172362;NM_002238	hyperM.iPSC
1	208923734	208924003	4	cg17180705,cg17589890,cg03216355,cg11159519	Body;Body,Body;Body,Body;Body,Body;Body	Island,Island,Island,S_Shore	KCNH1;KCNH1,KCNH1;KCNH1,KCNH1;KCNH1,KCNH1;KCNH1	NM_002238;NM_172362,NM_002238;NM_172362,NM_002238;NM_172362,NM_002238;NM_172362	hyperM.iPSC
1	209566261	209566568	3	cg10177528,cg01780943,cg09139451	TSS1500;TSS1500,TSS1500;TSS1500,TSS200;TSS1500	N_Shore,N_Shore,N_Shore	TRAF5;TRAF5,TRAF5;TRAF5,TRAF5;TRAF5	NM_004619;NM_001033910,NM_004619;NM_001033910,NM_004619;NM_001033910	hyperM.iPSC
1	209622452	209622909	8	cg05785348,cg13466970,cg19859980,cg06886207,cg14286274,cg22868409,cg13768174,cg09366861	TSS1500,TSS200,TSS200,TSS200,TSS200,Body,Body,Body	N_Shore,N_Shore,Island,Island,Island,Island,Island,Island	C1orf97,C1orf97,C1orf97,C1orf97,C1orf97,C1orf97,C1orf97,C1orf97	NR_026761,NR_026761,NR_026761,NR_026761,NR_026761,NR_026761,NR_026761,NR_026761	hyperM.iPSC
1	209718899	209719364	3	cg06640630,cg14264194,cg23358886	3'UTR;3'UTR,Body;Body,Body;Body	N_Shore,Island,Island	RD3;RD3,RD3;RD3,RD3;RD3	NM_183059;NM_001164688,NM_183059;NM_001164688,NM_183059;NM_001164688	hyperM.iPSC
1	209732752	209733075	4	cg00658007,cg04923746,cg06753273,cg24484971	1stExon;5'UTR;1stExon;5'UTR,TSS200;TSS200,TSS200;TSS200,TSS200;TSS200	_,_	RD3;RD3;RD3;RD3,RD3;RD3,RD3;RD3,RD3;RD3	NM_001164688;NM_001164688;NM_183059;NM_183059,NM_001164688;NM_183059,NM_001164688;NM_183059,NM_001164688;NM_183059	hyperM.iPSC
1	209734110	209734374	3	cg23621496,cg12483927,cg22481673	TSS1500;TSS1500,TSS1500;TSS1500,TSS1500;TSS1500	_,_	RD3;RD3,RD3;RD3,RD3;RD3	NM_001164688;NM_183059,NM_001164688;NM_183059,NM_001164688;NM_183059	hyperM.iPSC
1	210070612	210071091	2	cg13064658,cg26659410	5'UTR;1stExon,TSS1500	Island,S_Shore	LPGAT1;LPGAT1,LPGAT1	NM_014873;NM_014873,NM_014873	hyperM.iPSC
1	210655203	210655695	2	cg06776976,cg02343275	TSS1500,TSS1500	S_Shore,S_Shore	TMEM206,TMEM206	NM_018252,NM_018252	hyperM.iPSC
1	210755539	210755620	3	cg18147098,cg10533103,cg23075506	_,_	S_Shore,S_Shore,S_Shore	_,_	_,_	hypoM.iPSC
1	210799822	210799853	2	cg14212891,cg17751747	_,_	S_Shore,S_Shore	_,_	_,_	hyperM.iPSC
1	210804927	210805736	3	cg18317154,cg04323713,cg23534142	TSS1500,TSS200,5'UTR	_,_	ATF3,ATF3,ATF3	NM_001030287,NM_001030287,NM_001030287	hyperM.iPSC
1	210864823	210864986	2	cg10026613,cg10531372	1stExon;5'UTR,1stExon	_,_	FAM71A;FAM71A,FAM71A	NM_153606;NM_153606,NM_153606	hyperM.iPSC
1	210940586	210941257	5	cg16410706,cg09952946,cg06150468,cg00168835,cg08138435	TSS1500,TSS1500,TSS1500,TSS1500,TSS1500	Island,Island,S_Shore,S_Shore,S_Shore	BATF3,BATF3,BATF3,BATF3,BATF3	NM_018664,NM_018664,NM_018664,NM_018664,NM_018664	hyperM.iPSC
1	211156739	211156863	3	cg15130102,cg04607844,cg12596505	_,_	_,_	_,_	_,_	hyperM.iPSC
1	211620989	211621120	2	cg10224795,cg13209077	_,_	_,_	_,_	_,_	hyperM.iPSC
1	211629401	211630262	3	cg20692980,cg04975227,cg15962375	_,_	Island,Island,S_Shore	_,_	_,_	hyperM.iPSC
1	212219332	212219659	3	cg00668303,cg26054764,cg26933866	_,_	N_Shore,N_Shore,N_Shore	_,_	_,_	hypoM.iPSC
1	212220863	212221559	2	cg06177568,cg01659176	_,_	N_Shore,N_Shore	_,_	_,_	hypoM.iPSC
1	212223465	212226233	14	cg05052969,cg00795024,cg00949753,cg07896717,cg23633547,cg01631319,cg07204874,cg06268921,cg23971069,cg10288510,cg18318878,cg06623935,cg20692998,cg01019971	_,_	Island,N_Shore,N_Shore,N_Shore,N_Shore,N_Shore,N_Shore,N_Shore,N_Shore,Island,Island,N_Shore,N_Shore,N_Shore	_,_	_,_	hypoM.iPSC
1	212236535	212237616	7	cg16382030,cg22800590,cg17829746,cg25379954,cg03141679,cg00001364,cg01902845	Body,Body,Body,Body,Body,Body,Body	_,_	PROX1,PROX1,PROX1,PROX1,PROX1,PROX1,PROX1	NM_002763,NM_002763,NM_002763,NM_002763,NM_002763,NM_002763,NM_002763	hyperM.iPSC
1	213245281	213245839	5	cg13107973,cg22821560,cg02166981,cg14989033,cg00848374	TSS1500,TSS200,1stExon;5'UTR,1stExon;5'UTR,1stExon;5'UTR	_,_	KCNK2,KCNK2,KCNK2;KCNK2,KCNK2;KCNK2,KCNK2;KCNK2	NM_001017424,NM_001017424,NM_001017424;NM_001017424,NM_001017424;NM_001017424,NM_001017424;NM_001017424	hyperM.iPSC
1	213321733	213321784	2	cg11200222,cg05129325	TSS1500;TSS1500;Body,TSS1500;TSS1500;Body	N_Shore,N_Shore	KCNK2;KCNK2;KCNK2,KCNK2;KCNK2;KCNK2	NM_014217;NM_001017425;NM_001017424,NM_014217;NM_001017425;NM_001017424	hypoM.iPSC
1	214663262	214663431	2	cg15590780,cg27566805	1stExon;1stExon;5'UTR;5'UTR,TSS200;TSS200	_,_	USH2A;USH2A;USH2A;USH2A,USH2A;USH2A	NM_007123;NM_206933;NM_206933;NM_007123,NM_206933;NM_007123	hyperM.iPSC
1	214963907	214963916	2	cg23963317,cg00903998	5'UTR;TSS1500;TSS1500;5'UTR;5'UTR,5'UTR;TSS1500;TSS1500;5'UTR;5'UTR	_,_	ESRRG;ESRRG;ESRRG;ESRRG;ESRRG,ESRRG;ESRRG;ESRRG;ESRRG;ESRRG	NM_206594;NM_001438;NR_024099;NM_206595;NM_001134285,NM_206594;NM_001438;NR_024099;NM_206595;NM_001134285	hypoM.iPSC
1	215330130	215330470	4	cg24933127,cg11692820,cg07312357,cg25614875	TSS1500;TSS1500;5'UTR,TSS1500;TSS1500;5'UTR,TSS1500;TSS1500;5'UTR,TSS1500;TSS1500;5'UTR	S_Shore,S_Shore,S_Shore,S_Shore	ESRRG;ESRRG;ESRRG,ESRRG;ESRRG;ESRRG,ESRRG;ESRRG;ESRRG,ESRRG;ESRRG;ESRRG	NM_206594;NM_206595;NM_001134285,NM_206594;NM_206595;NM_001134285,NM_206594;NM_206595;NM_001134285,NM_206594;NM_206595;NM_001134285	hypoM.iPSC
1	215373323	215373386	2	cg04217177,cg00256046	5'UTR,5'UTR	N_Shore,N_Shore	ESRRG,ESRRG	NM_001134285,NM_001134285	hypoM.iPSC
1	215376191	215377195	5	cg09106903,cg25851789,cg12636169,cg09826050,cg04236178	5'UTR,5'UTR,5'UTR,5'UTR,5'UTR	N_Shore,N_Shore,N_Shore,N_Shore,N_Shore	ESRRG,ESRRG,ESRRG,ESRRG,ESRRG	NM_001134285,NM_001134285,NM_001134285,NM_001134285,NM_001134285	hypoM.iPSC
1	215378231	215380907	9	cg24630419,cg27520776,cg11800620,cg13967702,cg13461390,cg00116092,cg23663428,cg13321105,cg00983697	TSS1500,TSS1500,TSS1500,TSS1500,TSS1500,_	Island,S_Shore,S_Shore,S_Shore,S_Shore,S_Shore,S_Shore,S_Shelf,S_Shelf	ESRRG,ESRRG,ESRRG,ESRRG,ESRRG,_	NM_001134285,NM_001134285,NM_001134285,NM_001134285,NM_001134285,_	hypoM.iPSC
1	216165109	216165216	2	cg00152577,cg24410255	_,_	_,_	_,_	_,_	hyperM.iPSC
1	218198720	218199351	2	cg10576232,cg21573359	_,_	_,_	_,_	_,_	hyperM.iPSC
1	218512602	218512830	5	cg11570585,cg27546195,cg12054080,cg01795562,cg16257868	TSS200,TSS200,TSS1500,TSS1500,TSS1500	S_Shore,S_Shore,S_Shore,S_Shore,S_Shore	RAB3GAP2,RAB3GAP2,RAB3GAP2,RAB3GAP2,RAB3GAP2	NM_012414,NM_012414,NM_012414,NM_012414,NM_012414	hyperM.iPSC
1	219116554	219118381	6	cg15469321,cg22616255,cg03901660,cg23647410,cg03329019,cg18645081	_,TSS1500	N_Shore,N_Shore,Island,N_Shore,N_Shore,N_Shore	_,HLX	_,NM_021958	hypoM.iPSC
1	219120464	219122587	15	cg24604749,cg21282663,cg02928365,cg22041228,cg20454002,cg22698272,cg07179669,cg12479878,cg19306970,cg02455346,cg07584855,cg04436994,cg14166284,cg09255910,cg17852326	Body,Body,Body,Body,Body,Body,Body,Body,Body,Body,Body,Body,Body,Body,Body	N_Shore,N_Shore,N_Shore,N_Shore,N_Shore,Island,Island,Island,N_Shore,N_Shore,Island,Island,Island,Island,N_Shore	HLX,HLX,HLX,HLX,HLX,HLX,HLX,HLX,HLX,HLX,HLX,HLX,HLX,HLX,HLX	NM_021958,NM_021958,NM_021958,NM_021958,NM_021958,NM_021958,NM_021958,NM_021958,NM_021958,NM_021958,NM_021958,NM_021958,NM_021958,NM_021958,NM_021958	hypoM.iPSC
1	219123859	219124821	6	cg02743632,cg09515921,cg15450098,cg26440142,cg12053004,cg08655206	Body,Body,Body,Body,Body,3'UTR	N_Shore,Island,Island,Island,Island,S_Shore	HLX,HLX,HLX,HLX,HLX,HLX	NM_021958,NM_021958,NM_021958,NM_021958,NM_021958,NM_021958	hypoM.iPSC
1	219126037	219127376	3	cg01817019,cg07722657,cg23603194	_,_	N_Shore,N_Shore,N_Shore	_,_	_,_	hypoM.iPSC
1	219128460	219133311	10	cg06951677,cg16008148,cg25464265,cg07903237,cg26220673,cg24469980,cg08923271,cg08906307,cg22022798,cg18023943	_,_	S_Shore,S_Shore,N_Shore,N_Shore,N_Shore,Island,Island,Island,N_Shore,N_Shore	_,_	_,_	hypoM.iPSC
1	219134794	219136816	8	cg18788664,cg14315054,cg04539515,cg25001102,cg26047066,cg21680980,cg07241917,cg09140274	_,_	Island,N_Shore,Island,Island,Island,S_Shore,S_Shore,S_Shore	_,_	_,_	hypoM.iPSC
1	219575690	219577512	4	cg03536711,cg13861948,cg27518240,cg19865770	Body,TSS200,TSS1500,TSS1500	_,_	LOC400804,LOC400804,LOC400804,LOC400804	NR_024236,NR_024236,NR_024236,NR_024236	hyperM.iPSC
1	220694947	220695325	2	cg15078329,cg17836114	_,_	_,_	_,_	_,_	hyperM.iPSC
1	220787998	220788028	2	cg20582779,cg08942016	1stExon,1stExon;5'UTR	_,_	HHIPL2,HHIPL2;HHIPL2	NM_024746,NM_024746;NM_024746	hyperM.iPSC
1	221054468	221054740	2	cg22352176,cg02635260	_,_	N_Shore,N_Shore	_,_	_,_	hyperM.iPSC
1	221321447	221322203	3	cg07786256,cg03602898,cg21774220	_,_	Island,Island,S_Shore	_,_	_,_	hyperM.iPSC
1	221382875	221384088	4	cg03702975,cg07538512,cg04219417,cg07015886	5'UTR,TSS200,TSS1500,TSS1500	Island,S_Shore,S_Shore,S_Shore	TLR5,TLR5,TLR5,TLR5	NM_003268,NM_003268,NM_003268,NM_003268	hyperM.iPSC
1	221473633	221473718	2	cg14096207,cg25466245	Body,Body	_,_	SUSD4,SUSD4	NM_017982,NM_017982	hyperM.iPSC
1	221920572	221921327	3	cg23251790,cg02313130,cg04147929	TSS1500,TSS1500,TSS1500	_,_	CAPN8,CAPN8,CAPN8	NM_001143962,NM_001143962,NM_001143962	hyperM.iPSC
1	221955492	221955764	3	cg20266715,cg00792251,cg15033552	TSS1500,TSS1500,TSS200	_,_	CAPN2,CAPN2,CAPN2	NM_001146068,NM_001146068,NM_001146068	hyperM.iPSC
1	221966468	221966621	4	cg00339319,cg22697825,cg07629844,cg24150051	TSS1500;Body,TSS1500;Body,TSS200;Body,TSS200;Body	N_Shore,N_Shore,Island,Island	CAPN2;CAPN2,CAPN2;CAPN2,CAPN2;CAPN2,CAPN2;CAPN2	NM_001748;NM_001146068,NM_001748;NM_001146068,NM_001748;NM_001146068,NM_001748;NM_001146068	hyperM.iPSC
1	222003435	222003819	3	cg19598416,cg21617516,cg21167643	Body;Body,Body;Body,Body;Body	Island,Island,S_Shore	CAPN2;CAPN2,CAPN2;CAPN2,CAPN2;CAPN2	NM_001748;NM_001146068,NM_001748;NM_001146068,NM_001748;NM_001146068	hypoM.iPSC
1	222436945	222437209	2	cg12279138,cg05226019	TSS1500;TSS1500,TSS1500;TSS1500	N_Shore,Island	DEGS1;DEGS1,DEGS1;DEGS1	NM_144780;NM_003676,NM_144780;NM_003676	hyperM.iPSC
1	222595371	222595500	3	cg15988514,cg17296990,cg11231715	_,_	_,_	_,_	_,_	hyperM.iPSC
1	222686657	222687402	2	cg04099562,cg01122889	Body;Body,Body;Body	N_Shore,N_Shore	WDR26;WDR26,WDR26;WDR26	NM_025160;NM_001115113,NM_025160;NM_001115113	hyperM.iPSC
1	223728973	223729298	2	cg09694381,cg02365739	_,_	N_Shore,N_Shore	_,_	_,_	hyperM.iPSC
1	223738485	223738527	2	cg16598244,cg12444822	_,_	_,_	_,_	_,_	hyperM.iPSC
1	223931733	223932110	2	cg16247183,cg01077274	_,_	Island,S_Shore	_,_	_,_	hypoM.iPSC
1	224099840	224100173	2	cg02453929,cg12406822	3'UTR;3'UTR,3'UTR	_,_	EPHX1;EPHX1,TMEM63A	NM_001136018;NM_000120,NM_014698	hyperM.iPSC
1	224151702	224152459	2	cg01393234,cg21837189	_,_	_,_	_,_	_,_	hyperM.iPSC
1	224178996	224179681	3	cg07049680,cg06939851,cg06086141	TSS1500,TSS1500,TSS1500	Island,Island,S_Shore	PYCR2,PYCR2,PYCR2	NM_013328,NM_013328,NM_013328	hyperM.iPSC
1	224195249	224196447	4	cg11967457,cg22462235,cg20661303,cg20742696	1stExon,TSS1500,TSS1500,TSS1500	S_Shore,S_Shore,S_Shore,S_Shelf	LEFTY2,LEFTY2,LEFTY2,LEFTY2	NM_003240,NM_003240,NM_003240,NM_003240	hyperM.iPSC
1	224373513	224373856	2	cg22489204,cg00609227	_,_	N_Shelf,N_Shore	_,_	_,_	hyperM.iPSC
1	224389493	224389578	2	cg26680428,cg16991637	_,_	_,_	_,_	_,_	hyperM.iPSC
1	224564160	224564259	4	cg04439128,cg17985912,cg12962021,cg10778994	TSS1500,TSS1500,TSS1500,TSS1500	S_Shore,S_Shore,S_Shore,S_Shore	LIN9,LIN9,LIN9,LIN9	NM_173083,NM_173083,NM_173083,NM_173083	hyperM.iPSC
1	224748238	224748275	2	cg21646025,cg20411127	_,_	_,_	_,_	_,_	hyperM.iPSC
1	224801378	224801683	2	cg00279700,cg01232909	_,TSS1500	N_Shore,N_Shore	_,C1orf95	_,NM_001003665	hyperM.iPSC
1	224892058	224892229	3	cg24544320,cg26917828,cg16177187	Body,Body,Body	_,N_Shelf	ITPKB,ITPKB,ITPKB	NM_002221,NM_002221,NM_002221	hyperM.iPSC
1	224957551	224957565	2	cg00194374,cg09580882	Body,Body	N_Shore,N_Shore	ITPKB,ITPKB	NM_002221,NM_002221	hyperM.iPSC
1	224990880	224991362	3	cg05306109,cg23717186,cg00279406	Body,Body,Body	N_Shore,N_Shore,Island	ITPKB,ITPKB,ITPKB	NM_002221,NM_002221,NM_002221	hypoM.iPSC
1	224993568	224994611	4	cg11401257,cg13209122,cg03257293,cg19030737	TSS200,TSS1500,TSS1500,TSS1500	S_Shore,S_Shore,S_Shore,S_Shore	ITPKB,ITPKB,ITPKB,ITPKB	NM_002221,NM_002221,NM_002221,NM_002221	hyperM.iPSC
1	225082041	225082647	4	cg08654091,cg16985288,cg20484086,cg01784507	_,_	_,_	_,_	_,_	hyperM.iPSC
1	225230050	225230323	2	cg00786909,cg25974484	Body,Body	N_Shore,N_Shore	CABC1,CABC1	NM_020247,NM_020247	hyperM.iPSC
1	225240276	225240699	2	cg13572638,cg21157446	Body,Body	_,_	CABC1,CABC1	NM_020247,NM_020247	hyperM.iPSC
1	225701945	225702181	2	cg04117972,cg23173402	_,_	_,_	_,_	_,_	hyperM.iPSC
1	225762562	225763314	2	cg10117562,cg06315347	_,_	S_Shore,S_Shelf	_,_	_,_	hyperM.iPSC
1	225796086	225797504	5	cg03213967,cg26424645,cg11846112,cg09189118,cg20062050	_,_	N_Shore,Island,Island,Island,S_Shore	_,_	_,_	hyperM.iPSC
1	225812734	225815342	11	cg21436055,cg08111158,cg22344745,cg15594585,cg20011248,cg18947553,cg27056132,cg02736395,cg05053440,cg14789818,cg20699586	_,_	N_Shore,Island,Island,N_Shore,Island,Island,N_Shore,Island,Island,Island,Island	_,_	_,_	hyperM.iPSC
1	225990561	225990738	3	cg00355633,cg09796739,cg11520395	TSS1500;Body;TSS1500,TSS1500;Body;TSS1500,TSS1500;Body;TSS1500	S_Shore,S_Shore,S_Shore	JMJD4;SNAP47;JMJD4,JMJD4;SNAP47;JMJD4,JMJD4;SNAP47;JMJD4	NM_023007;NM_053052;NM_001161465,NM_023007;NM_053052;NM_001161465,NM_023007;NM_053052;NM_001161465	hyperM.iPSC
1	226029346	226029919	5	cg01426303,cg09867883,cg18801505,cg18592195,cg06768213	Body,Body,Body,Body,Body	_,_	SNAP47,SNAP47,SNAP47,SNAP47,SNAP47	NM_053052,NM_053052,NM_053052,NM_053052,NM_053052	hyperM.iPSC
1	226040800	226041327	3	cg21459583,cg06928246,cg11651614	_,_	N_Shore,Island,Island	_,_	_,_	hyperM.iPSC
1	226140258	226141429	3	cg01097408,cg11223365,cg14287512	_,_	N_Shore,N_Shore,N_Shore	_,_	_,_	hyperM.iPSC
1	226179481	226179830	2	cg04546165,cg06268632	Body,Body	N_Shore,Island	WNT9A,WNT9A	NM_003395,NM_003395	hyperM.iPSC
1	226200852	226201556	3	cg01428095,cg24610866,cg22525281	Body,Body,Body	N_Shore,Island,Island	WNT9A,WNT9A,WNT9A	NM_003395,NM_003395,NM_003395	hyperM.iPSC
1	226260208	226260659	2	cg09369927,cg13864473	TSS1500,TSS1500	N_Shore,N_Shore	WNT3A,WNT3A	NM_033131,NM_033131	hyperM.iPSC
1	226313255	226313403	2	cg12359809,cg09075558	Body,Body	Island,Island	WNT3A,WNT3A	NM_033131,NM_033131	hyperM.iPSC
1	226358109	226358328	3	cg04078980,cg15720832,cg14925024	TSS1500,TSS1500,TSS1500	S_Shore,S_Shore,S_Shore	C1orf35,C1orf35,C1orf35	NM_024319,NM_024319,NM_024319	hyperM.iPSC
1	226360333	226361024	2	ch.1.226360333F,cg03432225	_,3'UTR;3'UTR;3'UTR;3'UTR;3'UTR;3'UTR;3'UTR;3'UTR	N_Shore,N_Shore	_,MRPL55;MRPL55;MRPL55;MRPL55;MRPL55;MRPL55;MRPL55;MRPL55	_,NM_181456;NM_181454;NM_181462;NM_181465;NM_181441;NM_181464;NM_181463;NM_181455	hyperM.iPSC
1	226364487	226364598	3	cg22163199,cg09462576,cg08158976	TSS1500;TSS1500;TSS1500;TSS1500;TSS1500;TSS1500;TSS1500;TSS1500,TSS1500;TSS1500;TSS1500;TSS1500;TSS1500;TSS1500;TSS1500;TSS1500,TSS1500;TSS1500;TSS1500;TSS1500;TSS1500;TSS1500;TSS1500;TSS1500	S_Shore,S_Shore,S_Shore	MRPL55;MRPL55;MRPL55;MRPL55;MRPL55;MRPL55;MRPL55;MRPL55,MRPL55;MRPL55;MRPL55;MRPL55;MRPL55;MRPL55;MRPL55;MRPL55,MRPL55;MRPL55;MRPL55;MRPL55;MRPL55;MRPL55;MRPL55;MRPL55	NM_181441;NM_181464;NM_181456;NM_181465;NM_181462;NM_181455;NM_181454;NM_181463,NM_181441;NM_181464;NM_181456;NM_181465;NM_181462;NM_181455;NM_181454;NM_181463,NM_181441;NM_181464;NM_181456;NM_181465;NM_181462;NM_181455;NM_181454;NM_181463	hyperM.iPSC
1	226403804	226404399	4	cg24052475,cg01789576,cg08228672,cg20848130	TSS1500,TSS1500,5'UTR;1stExon,5'UTR	_,_	GJC2,GJC2,GJC2;GJC2,GJC2	NM_020435,NM_020435,NM_020435;NM_020435,NM_020435	hyperM.iPSC
1	226412961	226412970	2	cg17680089,cg23733384	Body,Body	Island,Island	GJC2,GJC2	NM_020435,NM_020435	hyperM.iPSC
1	226461230	226462721	6	cg18329175,cg27394460,cg00251125,cg09411356,cg26940100,cg19109050	TSS1500;TSS1500,TSS1500;TSS1500,TSS1500;TSS1500,TSS200;TSS200,TSS200;TSS200,5'UTR;5'UTR	_,N_Shelf,N_Shelf,N_Shelf	OBSCN;OBSCN,OBSCN;OBSCN,OBSCN;OBSCN,OBSCN;OBSCN,OBSCN;OBSCN,OBSCN;OBSCN	NM_052843;NM_001098623,NM_052843;NM_001098623,NM_052843;NM_001098623,NM_052843;NM_001098623,NM_052843;NM_001098623,NM_001098623;NM_052843	hyperM.iPSC
1	226468381	226468928	2	cg26303165,cg08312035	Body;Body,Body;Body	Island,N_Shore	OBSCN;OBSCN,OBSCN;OBSCN	NM_052843;NM_001098623,NM_052843;NM_001098623	hypoM.iPSC
1	226470879	226471570	2	cg23644589,cg12579230	Body;Body,Body;Body	Island,Island	OBSCN;OBSCN,OBSCN;OBSCN	NM_052843;NM_001098623,NM_052843;NM_001098623	hyperM.iPSC
1	226530672	226531017	4	cg13372766,cg10220895,cg04850211,cg05844789	Body;Body,Body;Body,Body;Body,Body;Body	Island,Island,Island,Island	OBSCN;OBSCN,OBSCN;OBSCN,OBSCN;OBSCN,OBSCN;OBSCN	NM_052843;NM_001098623,NM_052843;NM_001098623,NM_052843;NM_001098623,NM_052843;NM_001098623	hyperM.iPSC
1	226540404	226540556	3	cg11852843,cg13107669,cg20775370	Body;Body,Body;Body,Body;Body	N_Shore,Island,Island	OBSCN;OBSCN,OBSCN;OBSCN,OBSCN;OBSCN	NM_052843;NM_001098623,NM_052843;NM_001098623,NM_052843;NM_001098623	hyperM.iPSC
1	226561453	226561734	2	cg07382039,cg19746567	Body;Body,Body;Body	_,_	OBSCN;OBSCN,OBSCN;OBSCN	NM_052843;NM_001098623,NM_052843;NM_001098623	hyperM.iPSC
1	226568439	226569896	3	cg26362105,cg05048523,cg00270521	Body;Body,Body;Body,Body;Body	N_Shore,N_Shore,N_Shore	OBSCN;OBSCN,OBSCN;OBSCN,OBSCN;OBSCN	NM_052843;NM_001098623,NM_052843;NM_001098623,NM_052843;NM_001098623	hyperM.iPSC
1	226614392	226615465	6	cg04924099,cg07600278,cg15618533,cg00901843,cg21407117,cg07922933	Body;Body,Body;Body,Body;Body,3'UTR;Body,3'UTR;Body,3'UTR;Body	N_Shore,Island,Island,S_Shore,S_Shore,S_Shore	OBSCN;OBSCN,OBSCN;OBSCN,OBSCN;OBSCN,OBSCN;OBSCN,OBSCN;OBSCN,OBSCN;OBSCN	NM_052843;NM_001098623,NM_052843;NM_001098623,NM_052843;NM_001098623,NM_052843;NM_001098623,NM_052843;NM_001098623,NM_052843;NM_001098623	hyperM.iPSC
1	226624816	226625944	4	cg03040530,cg16397638,cg00566164,cg25002294	Body,Body,Body,Body	N_Shore,Island,Island,S_Shore	OBSCN,OBSCN,OBSCN,OBSCN	NM_001098623,NM_001098623,NM_001098623,NM_001098623	hyperM.iPSC
1	226647911	226648028	2	cg17910478,cg06829788	_,3'UTR	N_Shore,N_Shore	_,TRIM11	_,NM_145214	hyperM.iPSC
1	226701347	226701429	2	cg24070990,cg16894439	_,_	S_Shore,S_Shore	_,_	_,_	hypoM.iPSC
1	226724159	226724385	3	cg25622154,cg03569277,cg15033163	_,_	Island,N_Shore,N_Shore	_,_	_,_	hyperM.iPSC
1	226725596	226726022	3	cg00815832,cg11801727,cg21808258	_,_	Island,Island,S_Shore	_,_	_,_	hyperM.iPSC
1	226727355	226728298	2	cg05373655,cg09791366	_,_	S_Shore,S_Shelf	_,_	_,_	hyperM.iPSC
1	226937179	226937508	5	cg03145930,cg22517740,cg12127991,cg11431126,cg24885126	TSS1500,TSS1500,TSS1500,TSS200,1stExon;5'UTR	N_Shore,N_Shore,N_Shore,N_Shore,Island	RHOU,RHOU,RHOU,RHOU,RHOU;RHOU	NM_021205,NM_021205,NM_021205,NM_021205,NM_021205;NM_021205	hyperM.iPSC
1	226957424	226957929	3	cg16061472,cg20462561,cg00850481	_,_	Island,Island,S_Shore	_,_	_,_	hyperM.iPSC
1	227472983	227473157	3	cg23959311,cg06646021,cg05463325	TSS1500,TSS1500,TSS1500	N_Shore,N_Shore,N_Shore	RAB4A,RAB4A,RAB4A	NM_004578,NM_004578,NM_004578	hyperM.iPSC
1	227710888	227711034	3	cg05267876,cg18058949,cg26804128	TSS200,TSS1500,TSS1500	Island,S_Shore,S_Shore	NUP133,NUP133,NUP133	NM_018230,NM_018230,NM_018230	hyperM.iPSC
1	228466025	228466102	2	cg07231053,cg26893605	Body,Body	_,_	GALNT2,GALNT2	NM_004481,NM_004481	hyperM.iPSC
1	228524254	228525737	6	cg09938881,cg04095826,cg05266497,cg05888583,cg21547054,cg20967887	3'UTR,3'UTR,3'UTR,3'UTR,3'UTR,3'UTR	_,_	PGBD5,PGBD5,PGBD5,PGBD5,PGBD5,PGBD5	NM_024554,NM_024554,NM_024554,NM_024554,NM_024554,NM_024554	hyperM.iPSC
1	228559469	228560084	5	cg11570508,cg11226042,cg22875527,cg11216176,cg00572889	Body,Body,Body,Body,Body	Island,Island,Island,S_Shore,S_Shore	PGBD5,PGBD5,PGBD5,PGBD5,PGBD5	NM_024554,NM_024554,NM_024554,NM_024554,NM_024554	hyperM.iPSC
1	228579960	228580984	4	cg19560210,cg10877049,cg01671575,cg25368560	1stExon,TSS200,TSS200,TSS1500	_,_	PGBD5,PGBD5,PGBD5,PGBD5	NM_024554,NM_024554,NM_024554,NM_024554	hyperM.iPSC
1	228916673	228916922	2	cg24474852,cg19125606	1stExon;5'UTR,1stExon;5'UTR	_,_	AGT;AGT,AGT;AGT	NM_000029;NM_000029,NM_000029;NM_000029	hyperM.iPSC
1	228949010	228950175	3	cg27412093,cg24078695,cg06585893	TSS1500;TSS1500,TSS200;TSS200,Body;Body	_,_	CAPN9;CAPN9,CAPN9;CAPN9,CAPN9;CAPN9	NM_006615;NM_016452,NM_016452;NM_006615,NM_016452;NM_006615	hyperM.iPSC
1	229058331	229059037	2	cg17276863,ch.1.4544771F	Body;1stExon;5'UTR;Body,Body;Body;TSS1500	_,_	C1orf198;C1orf198;C1orf198;C1orf198,C1orf198;C1orf198;C1orf198	NM_032800;NM_001136495;NM_001136495;NM_001136494,NM_032800;NM_001136494;NM_001136495	hyperM.iPSC
1	229072010	229072518	3	cg02943290,cg17282145,cg04895895	TSS200;TSS1500,TSS1500;TSS1500,TSS1500	S_Shore,S_Shore,S_Shore	C1orf198;C1orf198,C1orf198;C1orf198,C1orf198	NM_001136494;NM_032800,NM_032800;NM_001136494,NM_001136494	hyperM.iPSC
1	229243631	229243824	2	cg17199320,cg16516400	TSS1500,TSS1500	Island,S_Shore	FAM89A,FAM89A	NM_198552,NM_198552	hyperM.iPSC
1	229363263	229363282	2	cg16368763,cg03538430	_,_	Island,Island	_,_	_,_	hypoM.iPSC
1	229365381	229365975	2	cg17102963,cg17137424	1stExon,1stExon	Island,Island	TRIM67,TRIM67	NM_001004342,NM_001004342	hyperM.iPSC
1	229442826	229443106	2	cg02014416,cg24865132	TSS1500;Body,TSS1500;Body	N_Shore,N_Shore	GNPAT;C1orf131,GNPAT;C1orf131	NM_014236;NM_152379,NM_014236;NM_152379	hyperM.iPSC
1	229537653	229539303	5	cg17001457,cg06978604,cg26227044,cg16387254,cg15528490	3'UTR;1stExon,1stExon,1stExon,TSS1500;TSS1500;1stExon,TSS1500;TSS1500;1stExon	N_Shore,N_Shore,N_Shore,N_Shore,N_Shore	EXOC8;EXOC8,EXOC8,EXOC8,C1orf124;C1orf124;EXOC8,C1orf124;C1orf124;EXOC8	NM_175876;NM_175876,NM_175876,NM_175876,NM_032018;NM_001010984;NM_175876,NM_032018;NM_001010984;NM_175876	hyperM.iPSC
1	229828311	229828468	3	cg24430578,cg00346898,cg13782866	Body;TSS1500;TSS1500;TSS1500;TSS1500;Body;TSS1500;TSS1500;Body;TSS1500;Body;TSS1500;TSS1500;Body;TSS1500;TSS1500;TSS1500;TSS1500;TSS1500;TSS1500;TSS1500;TSS1500;TSS1500;Body;Body;TSS1500;TSS1500;TSS1500;Body;TSS1500;TSS1500,Body;TSS1500;TSS1500;TSS1500;TSS1500;Body;TSS1500;TSS1500;Body;TSS1500;Body;TSS1500;TSS1500;Body;TSS1500;TSS1500;TSS1500;TSS1500;TSS1500;TSS1500;TSS1500;TSS1500;TSS1500;Body;B…	N_Shore,N_Shore,N_Shore	TSNAX-DISC1;DISC1;DISC1;DISC1;DISC1;TSNAX-DISC1;DISC1;DISC1;TSNAX-DISC1;DISC1;TSNAX-DISC1;DISC1;DISC1;TSNAX-DISC1;DISC1;DISC1;DISC1;DISC1;DISC1;DISC1;DISC1;DISC1;DISC1;TSNAX-DISC1;TSNAX-DISC1;DISC1;DISC1;DISC1;TSNAX-DISC1;DISC1;DISC1,TSNAX-DISC1;DISC1;DISC1;DISC1;DISC1;TSNAX-DISC1;DISC1;DISC1;TSNAX-DISC1;DISC1;TSNAX-DISC1;DISC1;DISC1;TSNAX-DISC1;DISC1;DISC1;DISC1;DISC1;DISC1;DISC1;DISC1;DISC1;DIS…	NR_028394;NM_001164556;NM_001164538;NM_018662;NM_001164555;NR_028397;NM_001164554;NM_001164552;NR_028393;NM_001164537;NR_028400;NM_001164551;NM_001164539;NR_028398;NM_001164540;NM_001164542;NM_001164548;NM_001012959;NM_001164547;NM_001164550;NM_001164546;NM_001012957;NM_001012958;NR_028399;NR_028395;NM_001164545;NM_001164549;NM_001164544;NR_028396;NM_001164553;NM_001164541,NR_028394;NM_001164556;…	hyperM.iPSC
1	230716246	230716765	3	cg14781041,cg07221695,cg02414710	1stExon,1stExon,1stExon	_,_	SIPA1L2,SIPA1L2,SIPA1L2	NM_020808,NM_020808,NM_020808	hyperM.iPSC
1	230718050	230718108	2	cg11930197,cg11337053	TSS200,TSS1500	_,_	SIPA1L2,SIPA1L2	NM_020808,NM_020808	hyperM.iPSC
1	231007613	231008153	6	cg02191044,cg02903907,cg18196782,cg15542798,cg16430166,cg05460318	1stExon,1stExon,1stExon,1stExon,1stExon,1stExon	N_Shore,Island,Island,Island,Island,Island	KIAA1383,KIAA1383,KIAA1383,KIAA1383,KIAA1383,KIAA1383	NM_019090,NM_019090,NM_019090,NM_019090,NM_019090,NM_019090	hyperM.iPSC
1	231315332	231315468	2	cg00980058,cg16371229	Body,Body	_,_	PCNXL2,PCNXL2	NM_014801,NM_014801	hyperM.iPSC
1	231496864	231497021	2	cg04604962,cg15720156	Body,Body	N_Shore,N_Shore	PCNXL2,PCNXL2	NM_014801,NM_014801	hypoM.iPSC
1	231498576	231499225	2	cg24716343,cg05560333	TSS1500,TSS1500	S_Shore,S_Shore	PCNXL2,PCNXL2	NM_014801,NM_014801	hyperM.iPSC
1	231564526	231564539	2	cg02452586,cg09347582	Body,Body	Island,Island	KIAA1804,KIAA1804	NM_032435,NM_032435	hyperM.iPSC
1	232106384	232106668	3	cg21396646,cg18115428,cg10878114	TSS1500,TSS1500,TSS1500	N_Shore,N_Shore,N_Shore	SLC35F3,SLC35F3,SLC35F3	NM_173508,NM_173508,NM_173508	hyperM.iPSC
1	232359694	232359766	2	cg17451688,cg20267718	Body,Body	_,_	SLC35F3,SLC35F3	NM_173508,NM_173508	hyperM.iPSC
1	232417457	232417611	3	cg13058819,cg25736663,cg13359765	Body,Body,Body	S_Shore,S_Shore,S_Shore	SLC35F3,SLC35F3,SLC35F3	NM_173508,NM_173508,NM_173508	hypoM.iPSC
1	232432163	232433945	4	cg01420001,cg00161124,cg23093692,cg04143909	Body,Body,Body,Body	N_Shore,N_Shore,Island,Island	SLC35F3,SLC35F3,SLC35F3,SLC35F3	NM_173508,NM_173508,NM_173508,NM_173508	hyperM.iPSC
1	232681616	232681993	4	cg22398808,cg03802191,cg11137277,cg24640065	TSS200,TSS1500,TSS1500,TSS1500	S_Shore,S_Shore,S_Shore,S_Shore	TARBP1,TARBP1,TARBP1,TARBP1	NM_005646,NM_005646,NM_005646,NM_005646	hyperM.iPSC
1	232733710	232734172	4	cg00123090,cg10811426,cg19856705,cg21546522	_,_	_,_	_,_	_,_	hyperM.iPSC
1	232808420	232809289	2	cg09517751,cg10825398	3'UTR;3'UTR,3'UTR;3'UTR	N_Shelf,N_Shore	IRF2BP2;IRF2BP2,IRF2BP2;IRF2BP2	NM_182972;NM_001077397,NM_182972;NM_001077397	hyperM.iPSC
1	232810311	232810453	3	cg19905445,cg25141943,cg00753492	Body;Body,Body;Body,Body;Body	N_Shore,N_Shore,N_Shore	IRF2BP2;IRF2BP2,IRF2BP2;IRF2BP2,IRF2BP2;IRF2BP2	NM_001077397;NM_182972,NM_001077397;NM_182972,NM_001077397;NM_182972	hyperM.iPSC
1	232814411	232815728	4	cg02977524,cg22351904,cg03317082,cg09324669	_,_	S_Shore,S_Shore,S_Shore,S_Shelf	_,_	_,_	hyperM.iPSC
1	233165712	233165774	3	cg27526774,cg00311883,cg02088292	_,_	_,_	_,_	_,_	hyperM.iPSC
1	233357028	233357747	2	cg19746343,cg10234506	Body,Body;Body	N_Shore,N_Shore	TOMM20,SNORA14B;TOMM20	NM_014765,NR_002956;NM_014765	hyperM.iPSC
1	233653661	233653754	2	cg00773060,cg26187802	Body;Body,Body;Body	_,_	TBCE;TBCE,TBCE;TBCE	NM_001079515;NM_003193,NM_001079515;NM_003193	hyperM.iPSC
1	234113562	234113657	2	cg02829654,cg12167564	_,_	_,_	_,_	_,_	hyperM.iPSC
1	234339958	234340068	2	cg07124956,cg13369284	_,_	_,_	_,_	_,_	hyperM.iPSC
1	234385050	234385168	2	cg01514015,cg23655242	Body,Body	_,_	GPR137B,GPR137B	NM_003272,NM_003272	hyperM.iPSC
1	234753187	234753294	3	cg01030476,cg18322510,cg09334514	TSS200;TSS200;5'UTR;TSS1500,TSS200;TSS200;5'UTR;TSS1500,TSS200;TSS200;5'UTR;TSS1500	N_Shore,N_Shore,N_Shore	LGALS8;LGALS8;LGALS8;LGALS8,LGALS8;LGALS8;LGALS8;LGALS8,LGALS8;LGALS8;LGALS8;LGALS8	NM_201543;NM_006499;NM_201545;NM_201544,NM_201543;NM_006499;NM_201545;NM_201544,NM_201543;NM_006499;NM_201545;NM_201544	hyperM.iPSC
1	234915076	234916096	3	cg06177278,cg10014470,cg10372476	TSS1500,TSS1500,TSS1500	N_Shore,N_Shore,Island	ACTN2,ACTN2,ACTN2	NM_001103,NM_001103,NM_001103	hyperM.iPSC
1	234969031	234969388	3	cg23109559,cg26406150,cg09932312	Body,Body,Body	_,_	ACTN2,ACTN2,ACTN2	NM_001103,NM_001103,NM_001103	hyperM.iPSC
1	234974580	234974687	2	cg23233975,cg15578091	Body,Body	_,_	ACTN2,ACTN2	NM_001103,NM_001103	hyperM.iPSC
1	236013869	236014038	2	cg23087876,cg03337341	Body,Body	Island,Island	RYR2,RYR2	NM_001035,NM_001035	hyperM.iPSC
1	236092037	236092210	2	cg11384661,cg03059126	TSS200,Body	_,_	LOC100130331,LOC100130331	NR_027247,NR_027247	hyperM.iPSC
1	236120451	236122052	5	cg03872376,cg06888270,cg20185945,cg26810908,cg03673470	1stExon;Body,TSS200;Body,TSS200;Body,TSS1500;Body,TSS1500;Body	_,_	ZP4;LOC100130331,ZP4;LOC100130331,ZP4;LOC100130331,ZP4;LOC100130331,ZP4;LOC100130331	NM_021186;NR_027247,NM_021186;NR_027247,NM_021186;NR_027247,NM_021186;NR_027247,NM_021186;NR_027247	hyperM.iPSC
1	237354345	237355315	2	cg27043880,cg23918821	_,_	_,_	_,_	_,_	hyperM.iPSC
1	238053967	238054022	2	cg08258494,cg04025049	5'UTR,5'UTR	_,_	CHRM3,CHRM3	NM_000740,NM_000740	hyperM.iPSC
1	238136909	238137598	2	cg22703515,cg06160669	5'UTR,Body	_,_	CHRM3,CHRM3	NM_000740,NM_000740	hyperM.iPSC
1	239587412	239587564	4	cg07944863,cg24472496,cg24800810,cg18271538	TSS1500,TSS1500,TSS1500,TSS1500	Island,S_Shore,S_Shore,S_Shore	RGS7,RGS7,RGS7,RGS7	NM_002924,NM_002924,NM_002924,NM_002924	hyperM.iPSC
1	239653749	239654406	3	cg26119543,cg15454726,cg16003102	_,_	N_Shore,Island,Island	_,_	_,_	hyperM.iPSC
1	239762239	239762869	2	cg00606312,cg18087514	TSS200,Body	_,_	KMO,KMO	NM_003679,NM_003679	hyperM.iPSC
1	239979387	239979391	2	cg05940691,cg07233230	Body,Body	_,_	WDR64,WDR64	NM_144625,NM_144625	hyperM.iPSC
1	240187853	240188450	3	cg11802765,cg07948496,cg21816942	_,_	_,_	_,_	_,_	hyperM.iPSC
1	240285220	240285764	2	cg15542144,cg11949115	_,_	N_Shore,N_Shore	_,_	_,_	hyperM.iPSC
1	240287161	240287394	2	cg18890544,cg06269928	_,_	Island,Island	_,_	_,_	hyperM.iPSC
1	240678449	240679868	5	cg00349573,cg02567839,cg20308540,cg23213872,cg11726474	5'UTR,5'UTR,5'UTR,5'UTR,5'UTR	_,_	PLD5,PLD5,PLD5,PLD5,PLD5	NM_152666,NM_152666,NM_152666,NM_152666,NM_152666	hyperM.iPSC
1	240749765	240750665	2	cg17150265,cg12636785	5'UTR,5'UTR	N_Shelf,N_Shelf	PLD5,PLD5	NM_152666,NM_152666	hyperM.iPSC
1	240834350	240834565	2	cg14520280,cg06903917	_,_	_,_	_,_	_,_	hyperM.iPSC
1	241713314	241713410	2	cg12211856,cg06882058	Body,Body	Island,Island	SDCCAG8,SDCCAG8	NM_006642,NM_006642	hypoM.iPSC
1	242146991	242147812	2	cg00705059,cg24718729	_,_	N_Shore,S_Shore	_,_	_,_	hyperM.iPSC
1	242280200	242281302	5	cg16399365,cg19698993,cg12869659,cg01105418,cg23829949	TSS1500,TSS1500,TSS1500,1stExon;5'UTR,1stExon;5'UTR	Island,Island,Island,S_Shore,S_Shore	ZNF238,ZNF238,ZNF238,ZNF238;ZNF238,ZNF238;ZNF238	NM_205768,NM_205768,NM_205768,NM_205768;NM_205768,NM_205768;NM_205768	hypoM.iPSC
1	242282854	242284950	4	cg22812005,cg26521186,cg06769116,cg14171188	Body;TSS1500,Body;1stExon,Body;1stExon,Body;1stExon	N_Shelf,N_Shore,N_Shore,Island	ZNF238;ZNF238,ZNF238;ZNF238,ZNF238;ZNF238,ZNF238;ZNF238	NM_205768;NM_006352,NM_205768;NM_006352,NM_205768;NM_006352,NM_205768;NM_006352	hyperM.iPSC
1	242329544	242329729	2	cg09665406,cg18857402	_,_	_,_	_,_	_,_	hyperM.iPSC
1	242690667	242691144	2	cg18947305,cg21916655	TSS1500;TSS1500,TSS200;TSS200	N_Shore,Island	C1orf101;C1orf101,C1orf101;C1orf101	NM_001130957;NM_173807,NM_001130957;NM_173807	hyperM.iPSC
1	242872619	242872678	2	cg10016770,cg11237215	_,_	_,_	_,_	_,_	hyperM.iPSC
1	243198757	243199405	2	cg23260484,cg08529295	TSS1500;TSS1500;TSS1500;TSS1500;TSS1500,TSS1500;TSS1500;TSS1500;TSS1500;TSS1500	N_Shore,N_Shore	EFCAB2;EFCAB2;EFCAB2;EFCAB2;EFCAB2,EFCAB2;EFCAB2;EFCAB2;EFCAB2;EFCAB2	NR_026588;NR_026586;NR_026587;NM_032328;NM_001143943,NR_026588;NR_026586;NR_026587;NM_032328;NM_001143943	hyperM.iPSC
1	243478206	243478227	2	cg10521023,cg26109154	Body,Body	_,_	KIF26B,KIF26B	NM_018012,NM_018012	hyperM.iPSC
1	243564711	243565312	2	cg02115218,cg15137445	Body,Body	N_Shore,N_Shore	KIF26B,KIF26B	NM_018012,NM_018012	hyperM.iPSC
1	243600572	243601554	2	cg25143359,cg26605712	Body,Body	_,_	KIF26B,KIF26B	NM_018012,NM_018012	hyperM.iPSC
1	243794210	243794281	2	cg23014549,cg03896752	Body,Body	_,_	KIF26B,KIF26B	NM_018012,NM_018012	hyperM.iPSC
1	243917849	243918233	2	cg10776230,cg15561613	Body,Body	Island,Island	KIF26B,KIF26B	NM_018012,NM_018012	hyperM.iPSC
1	243921945	243922164	2	cg11587466,cg16362305	Body,Body	S_Shelf,S_Shelf	KIF26B,KIF26B	NM_018012,NM_018012	hyperM.iPSC
1	244737521	244737563	2	cg18171512,cg01396391	TSS1500,TSS1500	S_Shore,S_Shore	SMYD3,SMYD3	NM_001167740,NM_001167740	hyperM.iPSC
1	244928879	244929382	2	cg05157272,cg03850234	_,_	_,_	_,_	_,_	hyperM.iPSC
1	245162648	245162711	2	cg07507951,cg23799440	TSS1500,TSS1500	S_Shore,S_Shore	AHCTF1,AHCTF1	NM_015446,NM_015446	hyperM.iPSC
1	245335243	245336710	4	cg22710865,cg24104569,cg17886715,cg19356179	TSS1500;TSS1500,_	S_Shore,S_Shore,S_Shore,S_Shelf	ZNF669;ZNF669,_	NM_024804;NM_001142572,_	hyperM.iPSC
1	245343270	245343589	2	cg18354594,cg05005077	TSS1500,TSS1500	S_Shore,S_Shore	C1orf229,C1orf229	NM_207401,NM_207401	hyperM.iPSC
1	245603782	245603847	2	cg21397540,cg23226914	_,_	_,_	_,_	_,_	hyperM.iPSC
1	245645175	245648689	10	cg18183941,cg21824010,cg21806273,cg21919599,cg03505654,cg03466998,cg26112639,cg24639969,cg21991396,cg14413862	TSS1500;TSS1500,TSS1500;TSS1500,TSS1500;TSS1500,TSS200;TSS200,5'UTR;5'UTR,TSS1500;5'UTR;TSS1500;TSS1500;5'UTR,TSS1500;5'UTR;TSS1500;TSS1500;5'UTR,TSS1500;5'UTR;TSS1500;TSS1500;5'UTR,5'UTR;5'UTR;1stExon;5'UTR;5'UTR;1stExon;5'UTR;1stExon,5'UTR;5'UTR;1stExon;5'UTR;5'UTR;1stExon;5'UTR;1stExon	_,_	NLRP3;NLRP3,NLRP3;NLRP3,NLRP3;NLRP3,NLRP3;NLRP3,NLRP3;NLRP3,NLRP3;NLRP3;NLRP3;NLRP3;NLRP3,NLRP3;NLRP3;NLRP3;NLRP3;NLRP3,NLRP3;NLRP3;NLRP3;NLRP3;NLRP3,NLRP3;NLRP3;NLRP3;NLRP3;NLRP3;NLRP3;NLRP3;NLRP3,NLRP3;NLRP3;NLRP3;NLRP3;NLRP3;NLRP3;NLRP3;NLRP3	NM_001079821;NM_001127461,NM_001079821;NM_001127461,NM_001079821;NM_001127461,NM_001127461;NM_001079821,NM_001079821;NM_001127461,NM_001127462;NM_001079821;NM_004895;NM_183395;NM_001127461,NM_001127462;NM_001079821;NM_004895;NM_183395;NM_001127461,NM_001127462;NM_001079821;NM_004895;NM_183395;NM_001127461,NM_001127462;NM_001079821;NM_183395;NM_183395;NM_004895;NM_004895;NM_001127461;NM_001127462,…	hyperM.iPSC
1	245653876	245654697	4	cg06710101,cg07164722,cg12280471,cg18793688	Body;Body;Body;Body;Body,Body;Body;Body;Body;Body,Body;Body;Body;Body;Body,Body;Body;Body;Body;Body	_,_	NLRP3;NLRP3;NLRP3;NLRP3;NLRP3,NLRP3;NLRP3;NLRP3;NLRP3;NLRP3,NLRP3;NLRP3;NLRP3;NLRP3;NLRP3,NLRP3;NLRP3;NLRP3;NLRP3;NLRP3	NM_001079821;NM_183395;NM_001127461;NM_001127462;NM_004895,NM_001079821;NM_183395;NM_001127461;NM_001127462;NM_004895,NM_001079821;NM_183395;NM_001127461;NM_001127462;NM_004895,NM_001079821;NM_183395;NM_001127461;NM_001127462;NM_004895	hyperM.iPSC
1	245678071	245678140	3	cg05396897,cg09226051,cg11422335	Body;Body;Body;Body;Body,Body;Body;Body;Body;Body,Body;Body;Body;Body;Body	N_Shelf,N_Shelf,N_Shelf	NLRP3;NLRP3;NLRP3;NLRP3;NLRP3,NLRP3;NLRP3;NLRP3;NLRP3;NLRP3,NLRP3;NLRP3;NLRP3;NLRP3;NLRP3	NM_001079821;NM_183395;NM_001127461;NM_001127462;NM_004895,NM_001079821;NM_183395;NM_001127461;NM_001127462;NM_004895,NM_001079821;NM_183395;NM_001127461;NM_001127462;NM_004895	hyperM.iPSC
1	245681277	245683309	8	cg07318145,cg14422922,cg05777962,cg24582475,cg06852298,cg21302594,cg00112952,cg14830002	1stExon,1stExon,1stExon,TSS200,TSS1500,TSS1500,TSS1500,TSS1500	N_Shore,Island,Island,S_Shore,S_Shore,S_Shore,S_Shore,S_Shore	OR2B11,OR2B11,OR2B11,OR2B11,OR2B11,OR2B11,OR2B11,OR2B11	NM_001004492,NM_001004492,NM_001004492,NM_001004492,NM_001004492,NM_001004492,NM_001004492,NM_001004492	hyperM.iPSC
1	245720763	245720883	2	cg00715811,cg09638704	TSS1500,TSS200	_,_	OR2W5,OR2W5	NM_001004698,NM_001004698	hyperM.iPSC
1	245747725	245748404	6	cg21950037,cg22374474,cg21399703,cg05639522,cg18198730,cg11166453	_,_	N_Shore,N_Shore,Island,Island,Island,Island	_,_	_,_	hyperM.iPSC
1	245760664	245761180	7	cg17545182,cg13930544,cg12754571,cg12758973,cg02104434,cg04899629,cg24873961	Body;3'UTR,Body;3'UTR,TSS200;3'UTR,TSS200;3'UTR,TSS1500;3'UTR,TSS1500;3'UTR,TSS1500;3'UTR	Island,Island,Island,Island,Island,S_Shore,S_Shore	LOC148824;OR2C3,LOC148824;OR2C3,LOC148824;OR2C3,LOC148824;OR2C3,LOC148824;OR2C3,LOC148824;OR2C3,LOC148824;OR2C3	NR_027309;NM_198074,NR_027309;NM_198074,NR_027309;NM_198074,NR_027309;NM_198074,NR_027309;NM_198074,NR_027309;NM_198074,NR_027309;NM_198074	hyperM.iPSC
1	245764125	245764964	3	cg20320823,cg02795546,cg22699727	TSS1500,TSS1500,TSS1500	S_Shelf,S_Shelf,S_Shelf	OR2C3,OR2C3,OR2C3	NM_198074,NM_198074,NM_198074	hyperM.iPSC
1	245778733	245779214	5	cg02052265,cg12769118,cg17518550,cg27573991,cg05767404	TSS1500,TSS200,TSS200,1stExon,Body	_,_	C1orf150,C1orf150,C1orf150,C1orf150,C1orf150	NM_145278,NM_145278,NM_145278,NM_145278,NM_145278	hyperM.iPSC
1	245869326	245869558	5	cg27543040,cg02518135,cg25220063,cg25017620,cg15829088	_,_	N_Shore,Island,Island,Island,Island	_,_	_,_	hyperM.iPSC
1	245942711	245943689	3	cg24460817,cg14156184,cg01507200	TSS200,TSS1500,TSS1500	_,_	OR6F1,OR6F1,OR6F1	NM_001005286,NM_001005286,NM_001005286	hyperM.iPSC
1	246071509	246072342	4	cg12080717,cg05726701,cg21542666,cg20805835	1stExon,1stExon,TSS1500,TSS1500	_,_	OR11L1,OR11L1,OR11L1,OR11L1	NM_001001959,NM_001001959,NM_001001959,NM_001001959	hyperM.iPSC
1	246085439	246086380	3	cg02148612,cg04902327,cg15094634	_,TSS1500,TSS1500	N_Shore,N_Shore,N_Shore	_,TRIM58,TRIM58	_,NM_015431,NM_015431	hyperM.iPSC
1	246177906	246178760	2	cg10580513,cg15087740	TSS1500;5'UTR,TSS200;5'UTR	_,_	OR2L8;OR2L13,OR2L8;OR2L13	NM_001001963;NM_175911,NM_001001963;NM_175911	hyperM.iPSC
1	246290597	246291510	2	cg21207403,cg05938958	TSS200;5'UTR,1stExon;5'UTR	_,_	OR2L3;OR2L13,OR2L3;OR2L13	NM_001004687;NM_175911,NM_001004687;NM_175911	hyperM.iPSC
1	246351594	246351886	2	cg01343097,cg18350545	TSS1500,TSS200	_,_	OR2M1P,OR2M1P	NR_002141,NR_002141	hyperM.iPSC
1	246366878	246367025	2	cg22523072,cg00966930	_,_	_,_	_,_	_,_	hyperM.iPSC
1	246433022	246433506	2	cg05353872,cg07598464	1stExon,1stExon	_,_	OR2M3,OR2M3	NM_001004689,NM_001004689	hyperM.iPSC
1	246590859	246591630	2	cg26353448,cg07483650	TSS1500,1stExon	_,_	OR2T4,OR2T4	NM_001004696,NM_001004696	hyperM.iPSC
1	246617796	246618032	2	cg00883837,cg20465661	1stExon,1stExon	_,_	OR2T6,OR2T6	NM_001005471,NM_001005471	hyperM.iPSC
1	246751389	246752005	2	cg25819275,cg05943574	TSS200,1stExon	_,_	OR2G6,OR2G6	NM_001013355,NM_001013355	hyperM.iPSC
1	246969390	246970556	5	cg04162032,cg23230830,cg03541887,cg10402995,cg16824319	1stExon;3'UTR,1stExon,TSS200,TSS200,TSS1500	_,_	LOC646627;LOC646627,LOC646627,LOC646627,LOC646627,LOC646627	NM_001085474;NM_001085474,NM_001085474,NM_001085474,NM_001085474,NM_001085474	hyperM.iPSC
1	247072310	247072485	2	cg02856842,cg11706999	3'UTR,3'UTR	N_Shore,N_Shore	SH3BP5L,SH3BP5L	NM_030645,NM_030645	hyperM.iPSC
1	247098570	247098580	2	cg16479674,cg16126747	TSS1500,TSS1500	N_Shore,N_Shore	ZNF672,ZNF672	NM_024836,NM_024836	hyperM.iPSC
1	247166258	247166662	2	cg11949328,cg01438286	TSS1500;TSS1500,TSS1500;TSS1500	N_Shore,N_Shore	PGBD2;PGBD2,PGBD2;PGBD2	NM_001017434;NM_170725,NM_001017434;NM_170725	hyperM.iPSC
2	183256	184026	4	cg18672716,cg14384416,cg18408209,cg24565620	_,_	_,N_Shelf,N_Shelf	_,_	_,_	hyperM.iPSC
2	193439	193715	2	cg10118717,cg24573898	_,_	_,_	_,_	_,_	hyperM.iPSC
2	253559	253656	2	cg26398848,cg13354988	TSS1500;TSS1500;Body;TSS1500;Body;TSS1500,TSS1500;TSS1500;Body;TSS1500;Body;TSS1500	Island,Island	ACP1;ACP1;SH3YL1;ACP1;SH3YL1;ACP1,ACP1;ACP1;SH3YL1;ACP1;SH3YL1;ACP1	NR_024080;NM_004300;NM_001159597;NM_001040649;NM_015677;NM_007099,NR_024080;NM_004300;NM_001159597;NM_001040649;NM_015677;NM_007099	hypoM.iPSC
2	276830	277395	3	cg25710298,cg05738152,cg18208842	Body,Body,Body	N_Shore,Island,Island	FAM150B,FAM150B,FAM150B	NM_001002919,NM_001002919,NM_001002919	hypoM.iPSC
2	300224	300853	2	cg20273422,cg15553342	_,_	S_Shore,S_Shore	_,_	_,_	hyperM.iPSC
2	304573	305462	2	cg24737408,cg22405774	_,_	N_Shore,S_Shore	_,_	_,_	hyperM.iPSC
2	355090	356012	4	cg22475859,cg14123882,cg18560965,cg07163640	_,_	_,_	_,_	_,_	hyperM.iPSC
2	372090	372356	3	cg07160793,cg19710238,cg13170076	_,_	_,_	_,_	_,_	hypoM.iPSC
2	381060	381183	2	cg07196462,cg24344414	_,_	_,_	_,_	_,_	hyperM.iPSC
2	382642	382873	2	cg17587385,cg23523711	_,_	_,_	_,_	_,_	hyperM.iPSC
2	384115	384481	4	cg19039481,cg10717610,cg23982445,cg23399257	_,_	_,_	_,_	_,_	hyperM.iPSC
2	407421	408075	2	cg26117389,cg26545519	_,_	N_Shelf,N_Shore	_,_	_,_	hyperM.iPSC
2	428095	430188	5	cg26385097,cg00369181,cg17489871,cg10012393,cg19007570	_,_	_,_	_,_	_,_	hyperM.iPSC
2	435069	435224	2	cg03210281,cg08579962	_,_	_,_	_,_	_,_	hyperM.iPSC
2	456990	457089	3	cg21124476,cg06520814,cg14144469	_,_	N_Shore,N_Shore,N_Shore	_,_	_,_	hyperM.iPSC
2	458934	459214	4	cg22490454,cg26349358,cg13973086,cg08031492	_,_	S_Shore,S_Shore,S_Shore,S_Shore	_,_	_,_	hypoM.iPSC
2	474237	474825	2	cg27457631,cg06432426	_,_	_,_	_,_	_,_	hyperM.iPSC
2	479332	480417	4	cg13973124,cg20679626,cg20296327,cg12652502	_,_	_,_	_,_	_,_	hyperM.iPSC
2	487193	487417	2	cg03802817,cg06417878	_,_	S_Shore,S_Shore	_,_	_,_	hyperM.iPSC
2	558198	558321	2	cg16711011,cg06640593	_,_	_,_	_,_	_,_	hyperM.iPSC
2	610106	610310	3	cg13416517,cg15517113,cg19997179	_,_	N_Shore,N_Shore,N_Shore	_,_	_,_	hyperM.iPSC
2	618881	619022	4	cg26342985,cg13314394,cg09887415,cg03296200	_,_	N_Shore,Island,Island,Island	_,_	_,_	hyperM.iPSC
2	626937	627432	2	cg14636804,cg25614596	_,_	Island,S_Shore	_,_	_,_	hyperM.iPSC
2	652770	653024	2	cg25785397,cg21644387	_,_	S_Shore,S_Shelf	_,_	_,_	hyperM.iPSC
2	681064	682026	3	cg20862447,cg04094846,cg13650504	_,_	_,_	_,_	_,_	hyperM.iPSC
2	698656	699329	3	cg09110388,cg21565937,cg14585167	_,_	_,_	_,_	_,_	hyperM.iPSC
2	766666	766719	2	cg18823499,cg04587424	_,_	_,_	_,_	_,_	hyperM.iPSC
2	784646	786476	7	cg06523516,cg06589199,cg01109734,cg18191209,cg21032567,cg24485927,cg07337120	_,_	_,_	_,_	_,_	hyperM.iPSC
2	847746	848038	2	cg00905746,cg26995653	_,_	_,_	_,_	_,_	hyperM.iPSC
2	856258	857791	4	cg23619936,cg21061994,cg23639196,cg03579107	_,_	S_Shore,S_Shore,S_Shelf,S_Shelf	_,_	_,_	hyperM.iPSC
2	865946	865990	2	cg04682087,cg27379715	_,_	_,_	_,_	_,_	hyperM.iPSC
2	871987	872228	2	cg12942932,cg13006655	_,_	_,_	_,_	_,_	hyperM.iPSC
2	896167	896974	4	cg03664459,cg04426779,cg17091441,cg00138710	TSS200,TSS1500,TSS1500,TSS1500	_,_	C2orf90,C2orf90,C2orf90,C2orf90	NM_001013662,NM_001013662,NM_001013662,NM_001013662	hyperM.iPSC
2	934690	935298	2	cg17497490,cg06431025	_,TSS1500	N_Shore,N_Shore	_,SNTG2	_,NM_018968	hypoM.iPSC
2	937117	937634	3	cg16179952,cg20193363,cg11691429	Body,Body,Body	Island,S_Shore,S_Shore	SNTG2,SNTG2,SNTG2	NM_018968,NM_018968,NM_018968	hypoM.iPSC
2	1194826	1194879	2	cg27243490,cg13049247	Body,Body	_,_	SNTG2,SNTG2	NM_018968,NM_018968	hyperM.iPSC
2	1216938	1217238	2	cg16165943,cg02888060	Body,Body	_,_	SNTG2,SNTG2	NM_018968,NM_018968	hyperM.iPSC
2	1220868	1220977	3	cg13470212,cg22075362,cg05299774	Body,Body,Body	_,_	SNTG2,SNTG2,SNTG2	NM_018968,NM_018968,NM_018968	hyperM.iPSC
2	1224241	1224303	2	cg01708202,cg26188420	Body,Body	_,_	SNTG2,SNTG2	NM_018968,NM_018968	hyperM.iPSC
2	1265401	1265404	2	cg00148862,cg09294347	Body,Body	Island,Island	SNTG2,SNTG2	NM_018968,NM_018968	hyperM.iPSC
2	1266794	1266985	3	cg13315744,cg12221580,cg26495357	Body,Body,Body	S_Shore,S_Shore,S_Shore	SNTG2,SNTG2,SNTG2	NM_018968,NM_018968,NM_018968	hyperM.iPSC
2	1270417	1270501	2	cg16410796,cg14575687	Body,Body	_,_	SNTG2,SNTG2	NM_018968,NM_018968	hyperM.iPSC
2	1337290	1337737	2	cg19885539,cg09210956	Body,Body	_,_	SNTG2,SNTG2	NM_018968,NM_018968	hyperM.iPSC
2	1356761	1357042	5	cg02096792,cg09508362,cg02794788,cg11912215,cg02514003	_,_	_,_	_,_	_,_	hyperM.iPSC
2	1358435	1358698	2	cg22386343,cg16901566	_,_	_,_	_,_	_,_	hyperM.iPSC
2	1404042	1404627	3	cg14478255,cg02963613,cg03795587	Body;Body;Body;Body,Body;Body;Body;Body,Body;Body;Body;Body	_,_	TPO;TPO;TPO;TPO,TPO;TPO;TPO;TPO,TPO;TPO;TPO;TPO	NM_175719;NM_000547;NM_175721;NM_175722,NM_175719;NM_000547;NM_175721;NM_175722,NM_175719;NM_000547;NM_175721;NM_175722	hyperM.iPSC
2	1405681	1405852	2	cg24216893,cg07088935	Body;Body;Body;Body,Body;Body;Body;Body	_,_	TPO;TPO;TPO;TPO,TPO;TPO;TPO;TPO	NM_175719;NM_000547;NM_175721;NM_175722,NM_175719;NM_000547;NM_175721;NM_175722	hyperM.iPSC
2	1431267	1431672	3	cg16407924,cg26605809,cg19368625	Body;Body;Body;Body,Body;Body;Body;Body,Body;Body;Body;Body	_,_	TPO;TPO;TPO;TPO,TPO;TPO;TPO;TPO,TPO;TPO;TPO;TPO	NM_175719;NM_000547;NM_175721;NM_175722,NM_175719;NM_000547;NM_175721;NM_175722,NM_175719;NM_000547;NM_175721;NM_175722	hyperM.iPSC
2	1461845	1461970	3	cg12666976,cg23985797,cg20957776	Body;Body;Body;Body,Body;Body;Body;Body,Body;Body;Body;Body	S_Shore,S_Shore,S_Shore	TPO;TPO;TPO;TPO,TPO;TPO;TPO;TPO,TPO;TPO;TPO;TPO	NM_175719;NM_000547;NM_175721;NM_175722,NM_175719;NM_000547;NM_175721;NM_175722,NM_175719;NM_000547;NM_175721;NM_175722	hyperM.iPSC
2	1466943	1467321	3	cg19905414,cg17299636,cg04152326	Body;Body;Body;Body,Body;Body;Body;Body,Body;Body;Body;Body	_,_	TPO;TPO;TPO;TPO,TPO;TPO;TPO;TPO,TPO;TPO;TPO;TPO	NM_175719;NM_000547;NM_175721;NM_175722,NM_175719;NM_000547;NM_175721;NM_175722,NM_175719;NM_000547;NM_175721;NM_175722	hyperM.iPSC
2	1472394	1473270	3	cg00626390,cg01681351,cg23596425	Body;Body;Body;Body,Body;Body;Body;Body,Body;Body;Body;Body	N_Shore,Island,S_Shore	TPO;TPO;TPO;TPO,TPO;TPO;TPO;TPO,TPO;TPO;TPO;TPO	NM_175719;NM_000547;NM_175721;NM_175722,NM_175719;NM_000547;NM_175721;NM_175722,NM_175719;NM_000547;NM_175721;NM_175722	hyperM.iPSC
2	1476822	1477072	2	cg13414059,cg18019372	Body;Body;Body;Body,Body;Body;Body;Body	S_Shelf,S_Shelf	TPO;TPO;TPO;TPO,TPO;TPO;TPO;TPO	NM_175719;NM_000547;NM_175721;NM_175722,NM_175719;NM_000547;NM_175721;NM_175722	hyperM.iPSC
2	1486746	1486839	2	cg10672136,cg23239637	Body;Body;Body;Body,Body;Body;Body;Body	_,_	TPO;TPO;TPO;TPO,TPO;TPO;TPO;TPO	NM_175719;NM_000547;NM_175721;NM_175722,NM_175719;NM_000547;NM_175721;NM_175722	hyperM.iPSC
2	1522553	1523377	5	cg21913853,cg19407717,cg04770020,cg06574769,cg18995558	Body;Body;Body;Body,Body;Body;Body;Body,Body;Body;Body;Body,Body;Body;Body;Body,Body;Body;Body;Body	N_Shore,N_Shore,Island,Island,Island	TPO;TPO;TPO;TPO,TPO;TPO;TPO;TPO,TPO;TPO;TPO;TPO,TPO;TPO;TPO;TPO,TPO;TPO;TPO;TPO	NM_175719;NM_000547;NM_175721;NM_175722,NM_175719;NM_000547;NM_175721;NM_175722,NM_175719;NM_000547;NM_175721;NM_175722,NM_175719;NM_000547;NM_175721;NM_175722,NM_175719;NM_000547;NM_175721;NM_175722	hyperM.iPSC
2	1544335	1547014	6	cg23371016,cg05695007,cg07503658,cg25693497,cg11985116,cg19441992	_,_	_,N_Shelf	_,_	_,_	hyperM.iPSC
2	1574505	1574741	2	cg08800613,cg05422049	_,_	Island,Island	_,_	_,_	hyperM.iPSC
2	1588069	1588667	5	cg23277693,cg16151651,cg13529733,cg21551340,cg11234688	_,_	_,_	_,_	_,_	hyperM.iPSC
2	1635564	1637240	4	cg24741066,cg01629007,cg21647182,cg07029777	Body,Body,Body,Body	S_Shelf,_	PXDN,PXDN,PXDN,PXDN	NM_012293,NM_012293,NM_012293,NM_012293	hyperM.iPSC
2	1690766	1691534	4	cg09699787,cg16909084,cg01328473,cg10366053	Body,Body,Body,Body	_,_	PXDN,PXDN,PXDN,PXDN	NM_012293,NM_012293,NM_012293,NM_012293	hyperM.iPSC
2	1727879	1728083	2	cg24129977,cg17801352	TSS1500,TSS1500	Island,S_Shore	PXDN,PXDN	NM_012293,NM_012293	hyperM.iPSC
2	1775083	1775235	3	cg00236305,cg22060041,cg09022325	Body,Body,Body	_,_	MYT1L,MYT1L,MYT1L	NM_015025,NM_015025,NM_015025	hyperM.iPSC
2	1799440	1801419	4	cg23861841,cg04369651,cg02542953,cg18807003	Body,Body,Body,Body	_,_	MYT1L,MYT1L,MYT1L,MYT1L	NM_015025,NM_015025,NM_015025,NM_015025	hyperM.iPSC
2	1821189	1822046	2	cg00287713,cg12915585	Body,Body	N_Shore,Island	MYT1L,MYT1L	NM_015025,NM_015025	hyperM.iPSC
2	1857997	1859019	6	cg17187595,cg20147164,cg26606257,cg04258102,cg10256733,cg22946562	Body,Body,Body,Body,Body,Body	_,_	MYT1L,MYT1L,MYT1L,MYT1L,MYT1L,MYT1L	NM_015025,NM_015025,NM_015025,NM_015025,NM_015025,NM_015025	hyperM.iPSC
2	1870064	1870074	2	cg14766621,cg14328535	Body,Body	_,_	MYT1L,MYT1L	NM_015025,NM_015025	hyperM.iPSC
2	1874198	1876227	5	cg19139320,cg10215032,cg06393879,cg17021436,cg23268979	Body,Body,Body,Body,Body	N_Shore,N_Shore,N_Shore,S_Shore,S_Shore	MYT1L,MYT1L,MYT1L,MYT1L,MYT1L	NM_015025,NM_015025,NM_015025,NM_015025,NM_015025	hyperM.iPSC
2	1892538	1892559	2	cg14880257,cg10178270	Body,Body	_,_	MYT1L,MYT1L	NM_015025,NM_015025	hyperM.iPSC
2	1905373	1906216	6	cg02966841,cg18148375,cg25654677,cg00067742,cg14128411,cg08689708	Body,Body,Body,Body,Body,Body	_,_	MYT1L,MYT1L,MYT1L,MYT1L,MYT1L,MYT1L	NM_015025,NM_015025,NM_015025,NM_015025,NM_015025,NM_015025	hyperM.iPSC
2	1921821	1922670	2	cg14958969,cg26315667	Body,Body	S_Shore,S_Shelf	MYT1L,MYT1L	NM_015025,NM_015025	hyperM.iPSC
2	1962197	1962525	4	cg20345923,cg00320539,cg17918270,cg02870147	Body,Body,Body,Body	_,_	MYT1L,MYT1L,MYT1L,MYT1L	NM_015025,NM_015025,NM_015025,NM_015025	hyperM.iPSC
2	2090630	2090655	2	cg21239227,cg17519749	5'UTR,5'UTR	_,_	MYT1L,MYT1L	NM_015025,NM_015025	hyperM.iPSC
2	2098540	2098860	2	cg26383138,cg13831106	5'UTR,5'UTR	_,_	MYT1L,MYT1L	NM_015025,NM_015025	hyperM.iPSC
2	2155781	2156538	2	cg21741679,cg13205617	5'UTR,5'UTR	_,_	MYT1L,MYT1L	NM_015025,NM_015025	hyperM.iPSC
2	2167210	2169285	4	cg02179341,cg15225844,cg01821656,cg09732255	5'UTR,5'UTR,5'UTR,5'UTR	N_Shore,Island,Island,S_Shore	MYT1L,MYT1L,MYT1L,MYT1L	NM_015025,NM_015025,NM_015025,NM_015025	hyperM.iPSC
2	2171079	2171373	2	cg21069434,cg05960850	5'UTR,5'UTR	N_Shore,N_Shore	MYT1L,MYT1L	NM_015025,NM_015025	hyperM.iPSC
2	2274513	2274593	2	cg03322328,cg16188379	5'UTR,5'UTR	_,_	MYT1L,MYT1L	NM_015025,NM_015025	hyperM.iPSC
2	2307398	2307716	3	cg03326215,cg00913032,cg02304095	5'UTR;Body,5'UTR;Body,5'UTR;Body	_,_	MYT1L;LOC730811,MYT1L;LOC730811,MYT1L;LOC730811	NM_015025;NR_024468,NM_015025;NR_024468,NM_015025;NR_024468	hyperM.iPSC
2	2315435	2316100	2	cg01395254,cg06588782	TSS1500,_	_,_	MYT1L,_	NM_015025,_	hyperM.iPSC
2	2526096	2526124	2	cg14042190,cg03447699	_,_	_,_	_,_	_,_	hyperM.iPSC
2	2548654	2549325	3	cg22950718,cg22683010,cg07362512	_,_	_,_	_,_	_,_	hyperM.iPSC
2	2560292	2560564	4	cg20506745,cg05092362,cg21740232,cg10767420	_,_	_,_	_,_	_,_	hyperM.iPSC
2	2569647	2569692	2	cg12539350,cg10562198	_,_	_,_	_,_	_,_	hyperM.iPSC
2	2622379	2622487	2	cg15365426,cg04062218	_,_	_,_	_,_	_,_	hyperM.iPSC
2	2633364	2634058	2	cg00732878,cg14667853	_,_	Island,S_Shore	_,_	_,_	hyperM.iPSC
2	2651674	2651788	3	cg12666921,cg02236554,cg23925283	_,_	_,_	_,_	_,_	hyperM.iPSC
2	2671861	2671896	2	cg23822732,cg16901302	_,_	_,_	_,_	_,_	hyperM.iPSC
2	2691676	2692392	4	cg21484315,cg27014783,cg02322969,cg07912020	_,_	_,_	_,_	_,_	hyperM.iPSC
2	2872149	2872739	3	cg14508405,cg06571123,cg13485248	_,_	_,_	_,_	_,_	hyperM.iPSC
2	2915607	2916475	3	cg20441619,cg13443016,cg17108285	_,_	_,_	_,_	_,_	hyperM.iPSC
2	3023806	3024338	3	cg02761944,cg20424973,cg14442405	_,_	_,_	_,_	_,_	hyperM.iPSC
2	3042122	3043030	5	cg05373263,cg01290791,cg07586391,cg06076512,cg02152985	_,_	N_Shore,N_Shore,Island,Island,S_Shore	_,_	_,_	hyperM.iPSC
2	3084060	3084144	2	cg03318593,cg14595617	_,_	_,_	_,_	_,_	hyperM.iPSC
2	3085229	3085302	2	cg16873451,cg13845961	_,_	_,_	_,_	_,_	hyperM.iPSC
2	3110283	3110379	4	cg06351520,cg14701108,cg11170044,cg14552732	_,_	_,_	_,_	_,_	hyperM.iPSC
2	3239684	3240162	2	cg21842959,cg14950134	Body,Body	_,_	TSSC1,TSSC1	NM_003310,NM_003310	hyperM.iPSC
2	3296700	3297046	3	cg21706038,cg21557724,cg14461974	Body,Body,Body	Island,Island,S_Shore	TSSC1,TSSC1,TSSC1	NM_003310,NM_003310,NM_003310	hyperM.iPSC
2	3301005	3301066	2	cg14166832,cg12924525	Body,Body	S_Shore,S_Shore	TSSC1,TSSC1	NM_003310,NM_003310	hyperM.iPSC
2	3431550	3432203	4	cg06360976,cg11642891,cg15807143,cg16793199	Body,Body,Body,Body	Island,Island,S_Shore,S_Shore	TTC15,TTC15,TTC15,TTC15	NM_016030,NM_016030,NM_016030,NM_016030	hyperM.iPSC
2	3448397	3448536	2	cg01143247,cg18941410	Body,Body	_,_	TTC15,TTC15	NM_016030,NM_016030	hyperM.iPSC
2	3600469	3600530	3	cg14240768,cg25819879,cg23466183	TSS1500,TSS1500,TSS200	N_Shore,N_Shore,Island	RPS7,RPS7,RPS7	NM_001011,NM_001011,NM_001011	hyperM.iPSC
2	3626403	3626429	3	cg05408590,cg21083023,cg21916898	5'UTR;5'UTR,5'UTR;5'UTR,5'UTR;5'UTR	_,_	COLEC11;COLEC11,COLEC11;COLEC11,COLEC11;COLEC11	NM_024027;NM_199235,NM_024027;NM_199235,NM_024027;NM_199235	hyperM.iPSC
2	3632117	3632345	2	cg09786321,cg20296924	Body;Body,Body;Body	_,_	COLEC11;COLEC11,COLEC11;COLEC11	NM_024027;NM_199235,NM_024027;NM_199235	hyperM.iPSC
2	3636769	3636808	2	cg18666930,cg08211853	Body;Body,Body;Body	_,_	COLEC11;COLEC11,COLEC11;COLEC11	NM_024027;NM_199235,NM_024027;NM_199235	hyperM.iPSC
2	3638743	3638814	3	cg23548658,cg26101364,cg02093176	Body;Body,Body;Body,Body;Body	_,_	COLEC11;COLEC11,COLEC11;COLEC11,COLEC11;COLEC11	NM_024027;NM_199235,NM_024027;NM_199235,NM_024027;NM_199235	hyperM.iPSC
2	3658097	3658296	2	cg15730644,cg14926093	Body;Body,Body;Body	N_Shelf,N_Shelf	COLEC11;COLEC11,COLEC11;COLEC11	NM_024027;NM_199235,NM_024027;NM_199235	hyperM.iPSC
2	3660905	3661158	3	cg01745480,cg27472937,cg09256862	Body;Body,Body;Body,Body;Body	Island,Island,Island	COLEC11;COLEC11,COLEC11;COLEC11,COLEC11;COLEC11	NM_024027;NM_199235,NM_024027;NM_199235,NM_024027;NM_199235	hyperM.iPSC
2	3667440	3667602	2	cg08690159,cg01196744	Body;Body,Body;Body	N_Shore,N_Shore	COLEC11;COLEC11,COLEC11;COLEC11	NM_024027;NM_199235,NM_024027;NM_199235	hyperM.iPSC
2	3669020	3669526	3	cg20362060,cg22277936,cg08117126	Body;Body,Body;Body,Body;Body	N_Shore,Island,Island	COLEC11;COLEC11,COLEC11;COLEC11,COLEC11;COLEC11	NM_024027;NM_199235,NM_024027;NM_199235,NM_024027;NM_199235	hyperM.iPSC
2	3675253	3676296	3	cg08980304,cg15355967,cg01730148	_,_	N_Shore,N_Shore,N_Shore	_,_	_,_	hyperM.iPSC
2	3682238	3683524	3	cg06156640,cg00933835,cg10260334	TSS1500,TSS1500,TSS200	_,_	ALLC,ALLC,ALLC	NM_018436,NM_018436,NM_018436	hyperM.iPSC
2	3692153	3692914	3	cg27089736,cg20493526,cg15327641	5'UTR,5'UTR,5'UTR	_,_	ALLC,ALLC,ALLC	NM_018436,NM_018436,NM_018436	hyperM.iPSC
2	3696078	3696090	2	cg02938936,cg26344334	5'UTR,5'UTR	_,_	ALLC,ALLC	NM_018436,NM_018436	hyperM.iPSC
2	3718621	3719607	2	cg08180497,cg05977776	Body,Body	_,_	ALLC,ALLC	NM_018436,NM_018436	hyperM.iPSC
2	3727854	3729545	6	cg23275064,cg21492308,cg00292756,cg15703756,cg11857704,cg04695513	Body,Body,3'UTR,_	N_Shore,N_Shore,N_Shore,N_Shore,Island,Island	ALLC,ALLC,ALLC,_	NM_018436,NM_018436,NM_018436,_	hyperM.iPSC
2	3792414	3792473	2	cg01618806,cg05299459	_,_	_,_	_,_	_,_	hyperM.iPSC
2	3796598	3796908	2	cg21596825,cg19764066	_,_	_,_	_,_	_,_	hyperM.iPSC
2	3804485	3804855	4	cg27091865,cg00910015,cg11809107,cg14989714	_,_	_,_	_,_	_,_	hyperM.iPSC
2	3806161	3806441	2	cg12573791,cg21204020	_,_	_,_	_,_	_,_	hyperM.iPSC
2	3813917	3814391	2	cg03985452,cg19106467	_,_	S_Shore,S_Shelf	_,_	_,_	hyperM.iPSC
2	3911614	3911923	3	cg10951591,cg18123760,cg23194912	_,_	_,_	_,_	_,_	hyperM.iPSC
2	3968204	3968688	3	cg07537581,cg10187167,cg26881591	_,_	_,_	_,_	_,_	hyperM.iPSC
2	4028672	4028720	2	cg16721427,cg15375488	_,_	Island,Island	_,_	_,_	hyperM.iPSC
2	4161455	4162002	2	cg09071834,cg22322870	_,_	_,_	_,_	_,_	hyperM.iPSC
2	4578822	4578928	2	cg26851570,cg22013195	_,_	_,_	_,_	_,_	hyperM.iPSC
2	4681697	4681751	3	cg22853943,cg10076479,cg19278235	_,_	_,_	_,_	_,_	hyperM.iPSC
2	4698473	4698508	2	cg02831260,cg25431819	_,_	_,_	_,_	_,_	hyperM.iPSC
2	4908990	4909773	2	cg02883150,cg11548191	_,_	_,_	_,_	_,_	hyperM.iPSC
2	5501998	5502065	2	cg25801636,cg11222219	_,_	_,_	_,_	_,_	hyperM.iPSC
[truncated: 16,030 more rows]
