# Supplementary material for: A panel of induced pluripotent stem cells from chimpanzees: a resource for comparative functional genomics
Source: eLife journal article supplement (doi:10.7554/elife.07103), 2015-06-23
Supplement: supp [file elife-07103-supp-v1.zip › elife_poa_e07103_Supplementary_File_15.txt]

chr	DMR.start	DMR.end	n.probes	Probes.in.DMR	Probe.gene.position	Probe.type	HGNC.gene	Refseq.gene	DMR.type
1	896226	896356	2	cg22381068,cg22481263	Body;Body,Body;Body	Island,Island	PLEKHN1;PLEKHN1,PLEKHN1;PLEKHN1	NM_032129;NM_001160184,NM_032129;NM_001160184	hyperM.iPSC
1	901858	901918	2	cg05505459,cg23635910	Body,Body	N_Shore,N_Shore	C1orf170,C1orf170	NR_027693,NR_027693	hyperM.iPSC
1	989689	989751	2	cg21139076,cg07549208	_,_	Island,Island	_,_	_,_	hyperM.iPSC
1	1051448	1051510	2	cg18329352,cg25973293	_,_	_,_	_,_	_,_	hyperM.iPSC
1	1053049	1054805	3	cg06798288,cg22512779,cg23622235	_,_	_,_	_,_	_,_	hyperM.iPSC
1	1055950	1056140	2	cg21775619,cg07179016	_,_	_,_	_,_	_,_	hyperM.iPSC
1	1066159	1066294	2	cg21862126,cg12097325	_,_	S_Shelf,S_Shelf	_,_	_,_	hyperM.iPSC
1	1068010	1068158	2	cg15207968,cg12658052	_,_	_,_	_,_	_,_	hyperM.iPSC
1	1083803	1083943	2	cg07213830,cg07718444	_,_	S_Shore,S_Shore	_,_	_,_	hyperM.iPSC
1	1087096	1087933	4	cg13560058,cg00082285,cg05336956,cg21778193	_,_	N_Shore,N_Shore,N_Shore,Island	_,_	_,_	hyperM.iPSC
1	1089426	1089514	3	cg14166948,cg08090385,cg20185617	_,_	Island,Island,Island	_,_	_,_	hyperM.iPSC
1	1091211	1091325	2	cg13449535,cg14144728	TSS1500,TSS1500	S_Shore,S_Shore	MIR200B,MIR200B	NR_029639,NR_029639	hyperM.iPSC
1	1093088	1093175	4	cg21810793,cg25101291,cg16561256,cg26910384	TSS200;TSS1500,TSS200;TSS1500,Body;TSS1500,Body;TSS1500	S_Shelf,S_Shelf,S_Shelf,S_Shelf	MIR200A;MIR429,MIR200A;MIR429,MIR200A;MIR429,MIR200A;MIR429	NR_029834;NR_029957,NR_029834;NR_029957,NR_029834;NR_029957,NR_029834;NR_029957	hyperM.iPSC
1	1098683	1099539	4	cg27631599,cg14709479,cg01961752,cg01511231	TSS1500,TSS1500,TSS1500,5'UTR	N_Shore,N_Shore,N_Shore,Island	TTLL10,TTLL10,TTLL10,TTLL10	NM_001130045,NM_001130045,NM_001130045,NM_001130045	hyperM.iPSC
1	1104561	1105783	6	cg07173112,cg23275914,cg14220262,cg24884961,cg03340606,cg05706898	Body;TSS1500,Body;TSS200,Body;TSS200,5'UTR;Body;1stExon,Body;Body,Body;Body	N_Shore,N_Shore,N_Shore,N_Shore,Island,Island	TTLL10;TTLL10,TTLL10;TTLL10,TTLL10;TTLL10,TTLL10;TTLL10;TTLL10,TTLL10;TTLL10,TTLL10;TTLL10	NM_001130045;NM_153254,NM_001130045;NM_153254,NM_001130045;NM_153254,NM_153254;NM_001130045;NM_153254,NM_153254;NM_001130045,NM_153254;NM_001130045	hyperM.iPSC
1	1125355	1125818	2	cg13360866,cg24807889	_,_	N_Shore,N_Shore	_,_	_,_	hyperM.iPSC
1	1132755	1134587	5	cg10583942,cg19092396,cg25144135,cg16266669,cg15924570	TSS1500;TSS1500;TSS1500,_	S_Shore,N_Shore,N_Shore,N_Shore,N_Shore	TNFRSF18;TNFRSF18;TNFRSF18,_	NM_148902;NM_148901;NM_004195,_	hyperM.iPSC
1	1138954	1139074	3	cg22335801,cg14661234,cg23394673	Body,Body,Body	Island,Island,Island	TNFRSF4,TNFRSF4,TNFRSF4	NM_003327,NM_003327,NM_003327	hyperM.iPSC
1	1171632	1173120	3	cg19236794,cg26314055,cg20747739	Body,TSS1500,TSS1500	Island,S_Shore,S_Shore	FAM132A,FAM132A,FAM132A	NM_001014980,NM_001014980,NM_001014980	hyperM.iPSC
1	1197652	1198289	2	cg23891364,cg21864845	5'UTR;5'UTR;5'UTR;5'UTR,5'UTR;5'UTR;5'UTR;5'UTR	N_Shore,N_Shore	UBE2J2;UBE2J2;UBE2J2;UBE2J2,UBE2J2;UBE2J2;UBE2J2;UBE2J2	NM_194315;NM_194457;NM_058167;NM_194458,NM_194315;NM_194457;NM_058167;NM_194458	hyperM.iPSC
1	1206966	1207527	6	cg11229611,cg06909630,cg12645236,cg00825734,cg22421766,cg24576260	TSS1500;TSS1500,TSS1500;TSS1500,TSS1500;TSS1500,5'UTR;TSS200;1stExon,5'UTR;1stExon;1stExon,5'UTR;1stExon;1stExon	_,_	SCNN1D;SCNN1D,SCNN1D;SCNN1D,SCNN1D;SCNN1D,SCNN1D;SCNN1D;SCNN1D,SCNN1D;SCNN1D;SCNN1D,SCNN1D;SCNN1D;SCNN1D	NM_001130413;NM_002978,NM_001130413;NM_002978,NM_001130413;NM_002978,NM_001130413;NM_002978;NM_001130413,NM_002978;NM_001130413;NM_002978,NM_002978;NM_001130413;NM_002978	hyperM.iPSC
1	1228660	1229862	3	cg27185793,cg09556527,cg07181952	Body,Body,Body	N_Shelf,N_Shelf,N_Shelf	ACAP3,ACAP3,ACAP3	NM_030649,NM_030649,NM_030649	hyperM.iPSC
1	1232593	1232595	2	cg26333156,cg00262415	TSS1500;Body,TSS1500;Body	Island,Island	PUSL1;ACAP3,PUSL1;ACAP3	NM_153339;NM_030649,NM_153339;NM_030649	hyperM.iPSC
1	1256331	1256980	7	cg04981007,cg16430279,cg24252805,cg07346648,cg08037114,cg07624812,cg04910752	TSS1500,TSS1500,TSS200,TSS200,TSS200,1stExon,Body	N_Shore,N_Shore,N_Shore,N_Shore,N_Shore,N_Shore,Island	TAS1R3,TAS1R3,TAS1R3,TAS1R3,TAS1R3,TAS1R3,TAS1R3	NM_152228,NM_152228,NM_152228,NM_152228,NM_152228,NM_152228,NM_152228	hyperM.iPSC
1	1283731	1284003	4	cg27399052,cg12478066,cg23036947,cg17132079	1stExon,TSS200,TSS200,TSS1500	S_Shelf,S_Shelf,S_Shelf,S_Shelf	MXRA8,MXRA8,MXRA8,MXRA8	NM_032348,NM_032348,NM_032348,NM_032348	hyperM.iPSC
1	1286534	1287439	5	cg20426768,cg21165029,cg03400623,cg22109675,cg15492552	_,_	_,_	_,_	_,_	hyperM.iPSC
1	1299194	1299504	2	cg25685675,cg06203720	Body;Body;Body,Body;Body;Body	Island,Island	AURKAIP1;AURKAIP1;AURKAIP1,AURKAIP1;AURKAIP1;AURKAIP1	NM_001127229;NM_017900;NM_001127230,NM_001127229;NM_017900;NM_001127230	hyperM.iPSC
1	1323641	1323899	2	cg24837149,cg16278124	Body;Body;Body;TSS1500;Body,Body;Body;Body;TSS1500;Body	N_Shore,N_Shore	CCNL2;CCNL2;CCNL2;LOC148413;CCNL2,CCNL2;CCNL2;CCNL2;LOC148413;CCNL2	NM_030937;NM_001144868;NM_001144867;NR_015434;NM_001039577,NM_030937;NM_001144868;NM_001144867;NR_015434;NM_001039577	hyperM.iPSC
1	1362540	1362907	2	cg08161163,cg26798702	Body;Body,Body;3'UTR	N_Shore,N_Shore	VWA1;VWA1,VWA1;VWA1	NM_022834;NM_199121,NM_022834;NM_199121	hyperM.iPSC
1	1365830	1366603	2	cg26795248,cg08426733	3'UTR;3'UTR,3'UTR;3'UTR	S_Shore,S_Shore	VWA1;VWA1,VWA1;VWA1	NM_199121;NM_022834,NM_199121;NM_022834	hyperM.iPSC
1	1385949	1386032	4	cg07280242,cg13798621,cg13487474,cg23016632	Body,Body,Body,Body	Island,Island,Island,Island	ATAD3C,ATAD3C,ATAD3C,ATAD3C	NM_001039211,NM_001039211,NM_001039211,NM_001039211	hyperM.iPSC
1	1539562	1539894	4	cg13897348,cg19246761,cg01229567,cg15817635	TSS1500;TSS1500;TSS1500;TSS1500;TSS1500,TSS1500;TSS1500;TSS1500;TSS1500;TSS1500;TSS1500,TSS1500;TSS1500;TSS1500;TSS1500;TSS1500;TSS1500,TSS1500;TSS1500;TSS1500;TSS1500;TSS1500;TSS1500	N_Shore,N_Shore,N_Shore,N_Shore	MIB2;MIB2;MIB2;MIB2;MIB2,MIB2;MIB2;MIB2;MIB2;MIB2;MIB2,MIB2;MIB2;MIB2;MIB2;MIB2;MIB2,MIB2;MIB2;MIB2;MIB2;MIB2;MIB2	NM_001170687;NM_001170688;NM_080875;NR_033183;NM_001170686,NM_001170689;NM_001170687;NM_001170688;NM_080875;NR_033183;NM_001170686,NM_001170689;NM_001170687;NM_001170688;NM_080875;NR_033183;NM_001170686,NM_001170689;NM_001170687;NM_001170688;NM_080875;NR_033183;NM_001170686	hyperM.iPSC
1	1815721	1816087	2	cg07380540,cg16652392	_,_	S_Shelf,S_Shelf	_,_	_,_	hyperM.iPSC
1	1836014	1836200	2	cg22364929,cg05132306	TSS200,1stExon;5'UTR	N_Shelf,N_Shelf	CALML6,CALML6;CALML6	NM_138705,NM_138705;NM_138705	hyperM.iPSC
1	1841244	1842076	3	cg04758387,cg10219957,cg04886783	TSS1500,TSS1500,TSS1500	Island,S_Shore,S_Shore	TMEM52,TMEM52,TMEM52	NM_178545,NM_178545,NM_178545	hyperM.iPSC
1	1847897	1847966	2	cg18231054,cg06092084	_,_	N_Shore,N_Shore	_,_	_,_	hyperM.iPSC
1	1860355	1861022	2	cg18383977,cg08639799	_,_	_,N_Shelf	_,_	_,_	hyperM.iPSC
1	1863359	1865640	5	cg15833286,cg16142957,cg07719258,cg15028578,cg17747265	_,_	N_Shore,N_Shore,N_Shore,Island,Island	_,_	_,_	hyperM.iPSC
1	1868255	1868425	2	cg08730434,cg26357403	_,_	S_Shelf,S_Shelf	_,_	_,_	hyperM.iPSC
1	1894940	1895478	3	cg06835814,cg07105421,cg26430560	Body,Body,Body	_,_	KIAA1751,KIAA1751,KIAA1751	NM_001080484,NM_001080484,NM_001080484	hyperM.iPSC
1	1903984	1904567	3	cg01799930,cg18270426,cg12701697	Body,Body,Body	S_Shore,S_Shore,S_Shore	KIAA1751,KIAA1751,KIAA1751	NM_001080484,NM_001080484,NM_001080484	hyperM.iPSC
1	1906204	1906754	2	cg26801936,cg15622118	Body,Body	S_Shelf,S_Shelf	KIAA1751,KIAA1751	NM_001080484,NM_001080484	hyperM.iPSC
1	1944984	1945622	2	cg19868751,cg13788313	Body,Body	N_Shore,N_Shore	GABRD,GABRD	NM_000815,NM_000815	hyperM.iPSC
1	1946933	1947665	3	cg15825127,cg24105782,cg05654059	Body,Body,Body	Island,Island,N_Shore	GABRD,GABRD,GABRD	NM_000815,NM_000815,NM_000815	hyperM.iPSC
1	1964521	1964558	2	cg04843461,cg16703312	_,_	N_Shore,Island	_,_	_,_	hyperM.iPSC
1	1967975	1968592	2	cg14978994,cg18120323	_,_	S_Shore,N_Shelf	_,_	_,_	hypoM.iPSC
1	1978541	1978627	2	cg26059839,cg14656575	Body,Body	N_Shelf,N_Shelf	PRKCZ,PRKCZ	NM_002744,NM_002744	hyperM.iPSC
1	1993134	1995892	14	cg08108679,cg11227141,cg24842354,cg08439149,cg00359465,cg04023573,cg04520340,cg16653138,cg13387826,cg19803229,cg14418633,cg03001333,cg13591369,cg27587033	Body,TSS1500;Body,TSS1500;Body,TSS1500;Body,TSS1500;Body,TSS1500;Body,1stExon;Body;5'UTR,1stExon;Body;5'UTR,1stExon;Body;5'UTR,1stExon;Body;5'UTR,Body;5'UTR,Body;5'UTR,Body;5'UTR,Body;5'UTR	N_Shore,N_Shore,N_Shore,N_Shore,N_Shore,N_Shore,N_Shore,Island,Island,Island,Island,Island,Island,S_Shore	PRKCZ,PRKCZ;PRKCZ,PRKCZ;PRKCZ,PRKCZ;PRKCZ,PRKCZ;PRKCZ,PRKCZ;PRKCZ,PRKCZ;PRKCZ;PRKCZ,PRKCZ;PRKCZ;PRKCZ,PRKCZ;PRKCZ;PRKCZ,PRKCZ;PRKCZ;PRKCZ,PRKCZ;PRKCZ,PRKCZ;PRKCZ,PRKCZ;PRKCZ,PRKCZ;PRKCZ	NM_002744,NM_001033581;NM_002744,NM_001033581;NM_002744,NM_001033581;NM_002744,NM_001033581;NM_002744,NM_001033581;NM_002744,NM_001033581;NM_002744;NM_001033581,NM_001033581;NM_002744;NM_001033581,NM_001033581;NM_002744;NM_001033581,NM_001033581;NM_002744;NM_001033581,NM_002744;NM_001033581,NM_002744;NM_001033581,NM_002744;NM_001033581,NM_002744;NM_001033581	hyperM.iPSC
1	2015066	2015301	2	cg24138964,cg20269544	Body;5'UTR,Body;5'UTR	Island,Island	PRKCZ;PRKCZ,PRKCZ;PRKCZ	NM_002744;NM_001033581,NM_002744;NM_001033581	hyperM.iPSC
1	2025640	2026368	2	cg12639453,cg17023856	TSS1500;Body;5'UTR,5'UTR;Body;5'UTR	N_Shelf,N_Shelf	PRKCZ;PRKCZ;PRKCZ,PRKCZ;PRKCZ;PRKCZ	NM_001033582;NM_002744;NM_001033581,NM_001033582;NM_002744;NM_001033581	hyperM.iPSC
1	2028237	2029531	4	cg13072890,cg22626579,cg12713909,cg06204101	5'UTR;Body;5'UTR,5'UTR;Body;5'UTR,5'UTR;Body;5'UTR,5'UTR;Body;5'UTR	N_Shore,Island,S_Shore,N_Shore	PRKCZ;PRKCZ;PRKCZ,PRKCZ;PRKCZ;PRKCZ,PRKCZ;PRKCZ;PRKCZ,PRKCZ;PRKCZ;PRKCZ	NM_001033582;NM_002744;NM_001033581,NM_001033582;NM_002744;NM_001033581,NM_001033582;NM_002744;NM_001033581,NM_001033582;NM_002744;NM_001033581	hyperM.iPSC
1	2036643	2036724	2	cg09179248,cg17426766	5'UTR;Body;5'UTR,5'UTR;Body;5'UTR	Island,Island	PRKCZ;PRKCZ;PRKCZ,PRKCZ;PRKCZ;PRKCZ	NM_001033582;NM_002744;NM_001033581,NM_001033582;NM_002744;NM_001033581	hyperM.iPSC
1	2048277	2049874	5	cg12718519,cg13480549,cg18188739,cg15481172,cg08106279	5'UTR;Body;5'UTR,5'UTR;Body;5'UTR,5'UTR;Body;5'UTR,5'UTR;Body;5'UTR,5'UTR;Body;5'UTR	_,N_Shelf	PRKCZ;PRKCZ;PRKCZ,PRKCZ;PRKCZ;PRKCZ,PRKCZ;PRKCZ;PRKCZ,PRKCZ;PRKCZ;PRKCZ,PRKCZ;PRKCZ;PRKCZ	NM_001033582;NM_002744;NM_001033581,NM_001033582;NM_002744;NM_001033581,NM_001033582;NM_002744;NM_001033581,NM_001033582;NM_002744;NM_001033581,NM_001033582;NM_002744;NM_001033581	hyperM.iPSC
1	2053735	2054301	5	cg06157219,cg18269141,cg25845463,cg04771433,cg15550572	5'UTR;Body;5'UTR,5'UTR;Body;5'UTR,5'UTR;Body;5'UTR,5'UTR;Body;5'UTR,5'UTR;Body;5'UTR	Island,Island,Island,N_Shore,N_Shore	PRKCZ;PRKCZ;PRKCZ,PRKCZ;PRKCZ;PRKCZ,PRKCZ;PRKCZ;PRKCZ,PRKCZ;PRKCZ;PRKCZ,PRKCZ;PRKCZ;PRKCZ	NM_001033582;NM_002744;NM_001033581,NM_001033582;NM_002744;NM_001033581,NM_001033582;NM_002744;NM_001033581,NM_001033582;NM_002744;NM_001033581,NM_001033582;NM_002744;NM_001033581	hyperM.iPSC
1	2071844	2072382	2	cg07693617,cg17435831	Body;Body;Body,Body;Body;Body	N_Shore,Island	PRKCZ;PRKCZ;PRKCZ,PRKCZ;PRKCZ;PRKCZ	NM_001033581;NM_001033582;NM_002744,NM_001033581;NM_001033582;NM_002744	hyperM.iPSC
1	2089605	2090029	2	cg07222721,cg16644344	Body;Body;Body,Body;Body;Body	_,_	PRKCZ;PRKCZ;PRKCZ,PRKCZ;PRKCZ;PRKCZ	NM_001033581;NM_001033582;NM_002744,NM_001033581;NM_001033582;NM_002744	hyperM.iPSC
1	2096082	2096480	4	cg15468976,cg27264462,cg23648809,cg02393699	Body;Body;Body,Body;Body;Body,Body;Body;Body,Body;Body;Body	_,_	PRKCZ;PRKCZ;PRKCZ,PRKCZ;PRKCZ;PRKCZ,PRKCZ;PRKCZ;PRKCZ,PRKCZ;PRKCZ;PRKCZ	NM_001033581;NM_001033582;NM_002744,NM_001033581;NM_001033582;NM_002744,NM_001033581;NM_001033582;NM_002744,NM_001033581;NM_001033582;NM_002744	hyperM.iPSC
1	2114909	2115103	2	cg04118472,cg18397998	Body;TSS200;Body,Body;TSS1500;Body	N_Shore,N_Shore	C1orf86;LOC100128003;C1orf86,C1orf86;LOC100128003;C1orf86	NM_001146310;NR_024445;NM_182533,NM_001146310;NR_024445;NM_182533	hyperM.iPSC
1	2129765	2130411	2	cg15840005,cg18565264	TSS1500,TSS1500	S_Shelf,N_Shelf	C1orf86,C1orf86	NM_001146310,NM_001146310	hyperM.iPSC
1	2134733	2134976	2	cg15451548,cg23632393	_,_	S_Shore,S_Shore	_,_	_,_	hyperM.iPSC
1	2152366	2153389	4	cg08640824,cg16417118,cg17942763,cg15132013	Body,Body,Body,Body	S_Shore,S_Shore,S_Shelf,S_Shelf	SKI,SKI,SKI,SKI	NM_003036,NM_003036,NM_003036,NM_003036	hyperM.iPSC
1	2154402	2156015	4	cg02058628,cg19404444,cg25139649,cg10397932	Body,Body,Body,Body	S_Shelf,S_Shelf,_	SKI,SKI,SKI,SKI	NM_003036,NM_003036,NM_003036,NM_003036	hyperM.iPSC
1	2161072	2161694	3	cg15979171,cg05156582,cg21775570	Body,Body,Body	_,_	SKI,SKI,SKI	NM_003036,NM_003036,NM_003036	hyperM.iPSC
1	2193449	2193508	2	cg01949002,cg12580943	Body,Body	_,_	SKI,SKI	NM_003036,NM_003036	hyperM.iPSC
1	2211667	2212534	6	cg00715290,cg13488570,cg01628067,cg02737619,cg22940848,cg08271229	Body,Body,Body,Body,Body,Body	N_Shore,Island,Island,Island,Island,S_Shore	SKI,SKI,SKI,SKI,SKI,SKI	NM_003036,NM_003036,NM_003036,NM_003036,NM_003036,NM_003036	hyperM.iPSC
1	2220461	2220783	4	cg15935121,cg26332488,cg09556700,cg23022809	Body,Body,Body,Body	N_Shore,N_Shore,N_Shore,N_Shore	SKI,SKI,SKI,SKI	NM_003036,NM_003036,NM_003036,NM_003036	hyperM.iPSC
1	2221785	2222387	6	cg12552820,cg01852476,cg26017930,cg13727629,cg08703055,cg23015118	Body,Body,Body,Body,Body,Body	N_Shore,N_Shore,N_Shore,Island,Island,Island	SKI,SKI,SKI,SKI,SKI,SKI	NM_003036,NM_003036,NM_003036,NM_003036,NM_003036,NM_003036	hyperM.iPSC
1	2239756	2240656	4	cg06368978,cg13214309,cg03324138,cg00567930	_,_	S_Shore,S_Shore,S_Shore,S_Shore	_,_	_,_	hyperM.iPSC
1	2242654	2243673	4	cg22349332,cg14171516,cg27054514,cg21107210	3'UTR,Body,Body,Body	N_Shore,N_Shore,N_Shore,Island	MORN1,MORN1,MORN1,MORN1	NM_024848,NM_024848,NM_024848,NM_024848	hyperM.iPSC
1	2252092	2252783	3	cg07701579,cg13865934,cg02896354	Body,Body,Body	N_Shelf,N_Shelf,N_Shelf	MORN1,MORN1,MORN1	NM_024848,NM_024848,NM_024848	hyperM.iPSC
1	2274390	2275038	3	cg19084427,cg27305939,cg26808154	Body;TSS1500,Body;TSS1500,Body;TSS1500	_,_	MORN1;LOC100129534,MORN1;LOC100129534,MORN1;LOC100129534	NM_024848;NR_024489,NM_024848;NR_024489,NM_024848;NR_024489	hyperM.iPSC
1	2313730	2314256	5	cg13014406,cg11142617,cg09024606,cg13102658,cg03533858	TSS1500;5'UTR,TSS1500;5'UTR,TSS1500;5'UTR,TSS1500;5'UTR,TSS1500;5'UTR	S_Shore,S_Shore,S_Shore,S_Shore,S_Shore	MORN1;RER1,MORN1;RER1,MORN1;RER1,MORN1;RER1,MORN1;RER1	NM_024848;NM_007033,NM_024848;NM_007033,NM_024848;NM_007033,NM_024848;NM_007033,NM_024848;NM_007033	hyperM.iPSC
1	2326435	2327194	3	cg07220650,cg17468855,cg16523185	3'UTR;3'UTR;3'UTR,3'UTR;3'UTR;3'UTR,Body;Body	N_Shelf,N_Shelf,N_Shelf	PEX10;RER1;PEX10,PEX10;RER1;PEX10,PEX10;PEX10	NM_002617;NM_007033;NM_153818,NM_002617;NM_007033;NM_153818,NM_002617;NM_153818	hyperM.iPSC
1	2339983	2340057	2	cg26857521,cg20826345	_,_	S_Shelf,_	_,_	_,_	hyperM.iPSC
1	2367275	2368381	3	cg16904348,cg15496335,cg10542127	_,_	S_Shore,S_Shelf,S_Shelf	_,_	_,_	hyperM.iPSC
1	2373361	2373547	2	cg13384949,cg00157179	_,_	_,N_Shelf	_,_	_,_	hyperM.iPSC
1	2397512	2399726	5	cg11229415,cg20351495,cg01486818,cg23911852,cg14984126	TSS200,Body,Body,Body,Body	N_Shelf,N_Shore,N_Shore,Island,Island	PLCH2,PLCH2,PLCH2,PLCH2,PLCH2	NM_014638,NM_014638,NM_014638,NM_014638,NM_014638	hyperM.iPSC
1	2400864	2401503	7	cg10129768,cg07821364,cg17918280,cg15153700,cg04259720,cg06824523,cg19760917	Body,Body,Body,Body,Body,Body,Body	N_Shore,Island,Island,Island,S_Shore,S_Shore,S_Shore	PLCH2,PLCH2,PLCH2,PLCH2,PLCH2,PLCH2,PLCH2	NM_014638,NM_014638,NM_014638,NM_014638,NM_014638,NM_014638,NM_014638	hyperM.iPSC
1	2413863	2415895	5	cg18023674,cg08039751,cg05772532,cg22495848,cg11692307	Body,Body,Body,Body,Body	_,_	PLCH2,PLCH2,PLCH2,PLCH2,PLCH2	NM_014638,NM_014638,NM_014638,NM_014638,NM_014638	hyperM.iPSC
1	2418724	2418796	3	cg24516259,cg24902038,cg09185998	Body,Body,Body	_,_	PLCH2,PLCH2,PLCH2	NM_014638,NM_014638,NM_014638	hyperM.iPSC
1	2419856	2420109	2	cg11854493,cg05396298	Body,Body	N_Shelf,N_Shelf	PLCH2,PLCH2	NM_014638,NM_014638	hyperM.iPSC
1	2421245	2425492	10	cg24295985,cg00153101,cg15627072,cg14941600,cg16648140,cg26783079,cg12644668,cg06350196,cg24314879,cg19911801	Body,Body,Body,Body,Body,Body,Body,Body,Body,Body	N_Shelf,N_Shore,N_Shore,N_Shore,Island,Island,N_Shore,Island,Island,Island	PLCH2,PLCH2,PLCH2,PLCH2,PLCH2,PLCH2,PLCH2,PLCH2,PLCH2,PLCH2	NM_014638,NM_014638,NM_014638,NM_014638,NM_014638,NM_014638,NM_014638,NM_014638,NM_014638,NM_014638	hyperM.iPSC
1	2426743	2427518	4	cg10961249,cg25037677,cg05697866,cg15574442	3'UTR,_	S_Shore,S_Shore,S_Shore,S_Shore	PLCH2,_	NM_014638,_	hyperM.iPSC
1	2505552	2506376	2	cg02393107,cg17077288	_,_	N_Shore,N_Shore	_,_	_,_	hyperM.iPSC
1	2526507	2527407	2	cg09105687,cg22489883	Body,Body	N_Shore,N_Shore	MMEL1,MMEL1	NM_033467,NM_033467	hyperM.iPSC
1	2549682	2549753	2	cg23606171,cg05874270	Body,Body	N_Shore,Island	MMEL1,MMEL1	NM_033467,NM_033467	hyperM.iPSC
1	2694984	2696195	4	cg15080866,cg13205528,cg05442408,cg00017437	_,_	N_Shore,N_Shore,Island,Island	_,_	_,_	hyperM.iPSC
1	2707614	2708602	2	cg13463719,cg08142858	_,_	S_Shore,S_Shore	_,_	_,_	hyperM.iPSC
1	2712186	2713077	5	cg02230408,cg25216300,cg24074480,cg02975102,cg17455297	_,_	_,_	_,_	_,_	hyperM.iPSC
1	2714444	2714469	2	cg20744353,cg14086822	_,_	_,_	_,_	_,_	hyperM.iPSC
1	2761706	2762524	6	cg24484895,cg08832782,cg01242872,cg13923696,cg07230639,cg03742273	_,_	N_Shore,N_Shore,Island,Island,Island,Island	_,_	_,_	hyperM.iPSC
1	2766832	2767104	3	cg03281194,cg06784198,cg24252695	_,_	N_Shore,Island,Island	_,_	_,_	hyperM.iPSC
1	2768701	2768921	2	cg06853416,cg18163442	_,_	S_Shore,S_Shore	_,_	_,_	hyperM.iPSC
1	2774526	2775242	2	cg00698169,cg11401214	_,_	_,_	_,_	_,_	hyperM.iPSC
1	2782497	2782564	2	cg15522425,cg15325070	_,_	_,_	_,_	_,_	hyperM.iPSC
1	2786053	2786126	2	cg09027255,cg07559303	_,_	_,_	_,_	_,_	hyperM.iPSC
1	2789214	2789522	2	cg16572957,cg11414913	_,_	_,_	_,_	_,_	hyperM.iPSC
1	2817658	2818104	4	cg23887776,cg15622619,cg15515265,cg23089691	_,_	Island,Island,Island,Island	_,_	_,_	hyperM.iPSC
1	2825118	2825683	2	cg13547132,cg09767550	_,_	_,_	_,_	_,_	hyperM.iPSC
1	2828790	2830037	4	cg24057775,cg06988547,cg00023726,cg19802390	_,_	_,_	_,_	_,_	hyperM.iPSC
1	2834731	2835374	3	cg23640231,cg00779565,cg15203905	_,_	N_Shelf,N_Shore,N_Shore	_,_	_,_	hyperM.iPSC
1	2836696	2838724	7	cg25367431,cg12415455,cg17403881,cg00413352,cg04141080,cg24428184,cg00878533	_,_	N_Shore,N_Shore,Island,Island,Island,S_Shore,N_Shore	_,_	_,_	hyperM.iPSC
1	2840101	2841362	4	cg21643748,cg13402298,cg00660693,cg04921646	_,_	N_Shore,Island,Island,S_Shore	_,_	_,_	hyperM.iPSC
1	2853661	2853875	3	cg24592500,cg25137787,cg03986665	_,_	_,_	_,_	_,_	hyperM.iPSC
1	2855953	2856527	2	cg11702662,cg24412662	_,_	_,_	_,_	_,_	hyperM.iPSC
1	2874945	2875028	3	cg27537199,cg01301282,cg11737757	_,_	Island,Island,Island	_,_	_,_	hyperM.iPSC
1	2880229	2880696	2	cg09938406,cg06437747	_,_	S_Shelf,S_Shelf	_,_	_,_	hyperM.iPSC
1	2886638	2886694	2	cg18644793,cg13300670	_,_	_,_	_,_	_,_	hyperM.iPSC
1	2918263	2919016	4	cg03296283,cg23226249,cg20141398,cg22377505	_,_	N_Shore,N_Shore,N_Shore,Island	_,_	_,_	hyperM.iPSC
1	2927859	2928977	6	cg04716261,cg18123385,cg10888031,cg06169627,cg07795402,cg05162202	TSS200,1stExon;5'UTR,1stExon,1stExon,1stExon,1stExon	N_Shore,N_Shore,Island,Island,Island,S_Shore	ACTRT2,ACTRT2;ACTRT2,ACTRT2,ACTRT2,ACTRT2,ACTRT2	NM_080431,NM_080431;NM_080431,NM_080431,NM_080431,NM_080431,NM_080431	hyperM.iPSC
1	2930685	2931235	2	cg23087661,cg10122878	_,_	S_Shore,S_Shelf	_,_	_,_	hyperM.iPSC
1	2936587	2936882	2	cg03976712,cg23960572	_,_	_,_	_,_	_,_	hyperM.iPSC
1	2938324	2938372	2	cg06866827,cg00169776	_,_	_,_	_,_	_,_	hyperM.iPSC
1	2943968	2944110	2	cg13491144,cg06792538	_,_	_,_	_,_	_,_	hyperM.iPSC
1	2972916	2973786	2	cg12524640,cg03256938	Body;Body,Body;Body	N_Shore,Island	FLJ42875;FLJ42875,FLJ42875;FLJ42875	NR_024371;NR_015440,NR_024371;NR_015440	hypoM.iPSC
1	2977774	2977821	2	cg22122862,cg18509466	Body;Body,Body;Body	Island,Island	PRDM16;PRDM16,PRDM16;PRDM16	NM_022114;NM_199454,NM_022114;NM_199454	hypoM.iPSC
1	2983911	2985366	4	cg06348826,cg17890044,cg12436196,cg08262220	Body;Body,Body;Body,Body;Body,Body;Body	N_Shelf,N_Shelf,N_Shore,N_Shore	PRDM16;PRDM16,PRDM16;PRDM16,PRDM16;PRDM16,PRDM16;PRDM16	NM_022114;NM_199454,NM_022114;NM_199454,NM_022114;NM_199454,NM_022114;NM_199454	hyperM.iPSC
1	2989056	2989446	2	cg04493316,cg10572807	Body;Body,Body;Body	N_Shore,N_Shore	PRDM16;PRDM16,PRDM16;PRDM16	NM_022114;NM_199454,NM_022114;NM_199454	hyperM.iPSC
1	3017331	3018895	10	cg21604357,cg08876274,cg07597386,cg24529814,cg14761019,cg06773295,cg12905252,cg01046951,cg10021614,cg23987257	Body;Body,Body;Body,Body;Body,Body;Body,Body;Body,Body;Body,Body;Body,Body;Body,Body;Body,Body;Body	N_Shore,Island,Island,Island,Island,S_Shore,S_Shore,S_Shore,S_Shore,S_Shore	PRDM16;PRDM16,PRDM16;PRDM16,PRDM16;PRDM16,PRDM16;PRDM16,PRDM16;PRDM16,PRDM16;PRDM16,PRDM16;PRDM16,PRDM16;PRDM16,PRDM16;PRDM16,PRDM16;PRDM16	NM_022114;NM_199454,NM_022114;NM_199454,NM_022114;NM_199454,NM_022114;NM_199454,NM_022114;NM_199454,NM_022114;NM_199454,NM_022114;NM_199454,NM_022114;NM_199454,NM_022114;NM_199454,NM_022114;NM_199454	hyperM.iPSC
1	3021320	3022659	3	cg20632748,cg02712922,cg03447135	Body;Body,Body;Body,Body;Body	S_Shelf,S_Shelf,_	PRDM16;PRDM16,PRDM16;PRDM16,PRDM16;PRDM16	NM_022114;NM_199454,NM_022114;NM_199454,NM_022114;NM_199454	hyperM.iPSC
1	3027928	3029070	5	cg22851557,cg01772149,cg14008571,cg24741666,cg26426080	Body;Body,Body;Body,Body;Body,Body;Body,Body;Body	Island,Island,S_Shore,S_Shore,S_Shore	PRDM16;PRDM16,PRDM16;PRDM16,PRDM16;PRDM16,PRDM16;PRDM16,PRDM16;PRDM16	NM_022114;NM_199454,NM_022114;NM_199454,NM_022114;NM_199454,NM_022114;NM_199454,NM_022114;NM_199454	hyperM.iPSC
1	3034628	3034837	3	cg23818827,cg21209214,cg15135176	Body;Body,Body;Body,Body;Body	_,_	PRDM16;PRDM16,PRDM16;PRDM16,PRDM16;PRDM16	NM_022114;NM_199454,NM_022114;NM_199454,NM_022114;NM_199454	hyperM.iPSC
1	3040697	3041785	3	cg10124445,cg00713435,cg14200569	Body;Body,Body;Body,Body;Body	_,_	PRDM16;PRDM16,PRDM16;PRDM16,PRDM16;PRDM16	NM_022114;NM_199454,NM_022114;NM_199454,NM_022114;NM_199454	hyperM.iPSC
1	3046012	3049127	15	cg05117823,cg06617975,cg26545580,cg01647724,cg21299491,cg00049709,cg19866637,cg05343184,cg03226435,cg19243842,cg22510139,cg24968931,cg14516243,cg13388191,cg01047045	Body;Body,Body;Body,Body;Body,Body;Body,Body;Body,Body;Body,Body;Body,Body;Body,Body;Body,Body;Body,Body;Body,Body;Body,Body;Body,Body;Body,Body;Body	N_Shore,Island,Island,Island,N_Shore,N_Shore,N_Shore,N_Shore,N_Shore,N_Shore,N_Shore,Island,Island,Island,Island	PRDM16;PRDM16,PRDM16;PRDM16,PRDM16;PRDM16,PRDM16;PRDM16,PRDM16;PRDM16,PRDM16;PRDM16,PRDM16;PRDM16,PRDM16;PRDM16,PRDM16;PRDM16,PRDM16;PRDM16,PRDM16;PRDM16,PRDM16;PRDM16,PRDM16;PRDM16,PRDM16;PRDM16,PRDM16;PRDM16	NM_022114;NM_199454,NM_022114;NM_199454,NM_022114;NM_199454,NM_022114;NM_199454,NM_022114;NM_199454,NM_022114;NM_199454,NM_022114;NM_199454,NM_022114;NM_199454,NM_022114;NM_199454,NM_022114;NM_199454,NM_022114;NM_199454,NM_022114;NM_199454,NM_022114;NM_199454,NM_022114;NM_199454,NM_022114;NM_199454	hyperM.iPSC
1	3061861	3062503	3	cg09321238,cg01104489,cg26222332	Body;Body,Body;Body,Body;Body	Island,Island,S_Shore	PRDM16;PRDM16,PRDM16;PRDM16,PRDM16;PRDM16	NM_022114;NM_199454,NM_022114;NM_199454,NM_022114;NM_199454	hyperM.iPSC
1	3063574	3063666	2	cg12096707,cg08110058	Body;Body,Body;Body	S_Shore,S_Shore	PRDM16;PRDM16,PRDM16;PRDM16	NM_022114;NM_199454,NM_022114;NM_199454	hyperM.iPSC
1	3067216	3068066	4	cg22029284,cg06367135,cg01448098,cg16265140	Body;Body,Body;Body,Body;Body,Body;Body	N_Shelf,N_Shelf,N_Shelf,N_Shelf	PRDM16;PRDM16,PRDM16;PRDM16,PRDM16;PRDM16,PRDM16;PRDM16	NM_022114;NM_199454,NM_022114;NM_199454,NM_022114;NM_199454,NM_022114;NM_199454	hyperM.iPSC
1	3070583	3071086	3	cg06182121,cg01203812,cg01413848	Body;Body,Body;Body,Body;Body	N_Shore,Island,Island	PRDM16;PRDM16,PRDM16;PRDM16,PRDM16;PRDM16	NM_022114;NM_199454,NM_022114;NM_199454,NM_022114;NM_199454	hyperM.iPSC
1	3077497	3077859	4	cg02299950,cg20154143,cg14217558,cg26435254	Body;Body,Body;Body,Body;Body,Body;Body	_,_	PRDM16;PRDM16,PRDM16;PRDM16,PRDM16;PRDM16,PRDM16;PRDM16	NM_022114;NM_199454,NM_022114;NM_199454,NM_022114;NM_199454,NM_022114;NM_199454	hyperM.iPSC
1	3089664	3090357	5	cg13393782,cg14966901,cg07209071,cg18759102,cg05354921	Body;Body,Body;Body,Body;Body,Body;Body,Body;Body	N_Shelf,N_Shelf,N_Shelf,N_Shelf,N_Shelf	PRDM16;PRDM16,PRDM16;PRDM16,PRDM16;PRDM16,PRDM16;PRDM16,PRDM16;PRDM16	NM_022114;NM_199454,NM_022114;NM_199454,NM_022114;NM_199454,NM_022114;NM_199454,NM_022114;NM_199454	hyperM.iPSC
1	3092908	3093902	3	cg05952379,cg13781678,cg10696969	Body;Body,Body;Body,Body;Body	Island,Island,N_Shore	PRDM16;PRDM16,PRDM16;PRDM16,PRDM16;PRDM16	NM_022114;NM_199454,NM_022114;NM_199454,NM_022114;NM_199454	hyperM.iPSC
1	3113360	3113714	3	cg17839324,cg00581154,cg22729726	Body;Body,Body;Body,Body;Body	_,_	PRDM16;PRDM16,PRDM16;PRDM16,PRDM16;PRDM16	NM_022114;NM_199454,NM_022114;NM_199454,NM_022114;NM_199454	hyperM.iPSC
1	3120345	3120395	2	cg04988794,cg06659980	Body;Body,Body;Body	_,_	PRDM16;PRDM16,PRDM16;PRDM16	NM_022114;NM_199454,NM_022114;NM_199454	hyperM.iPSC
1	3123671	3125696	6	cg04022097,cg08266202,cg23025459,cg10493186,cg01940181,cg16393928	Body;Body,Body;Body,Body;Body,Body;Body,Body;Body,Body;Body	_,_	PRDM16;PRDM16,PRDM16;PRDM16,PRDM16;PRDM16,PRDM16;PRDM16,PRDM16;PRDM16,PRDM16;PRDM16	NM_022114;NM_199454,NM_022114;NM_199454,NM_022114;NM_199454,NM_022114;NM_199454,NM_022114;NM_199454,NM_022114;NM_199454	hyperM.iPSC
1	3132785	3134396	9	cg24499605,cg22497969,cg07029287,cg23631759,cg06970451,cg26864297,cg21262776,cg05790380,cg24514678	Body;Body,Body;Body,Body;Body,Body;Body,Body;Body,Body;Body,Body;Body,Body;Body,Body;Body	_,N_Shelf,N_Shelf,N_Shelf,N_Shelf	PRDM16;PRDM16,PRDM16;PRDM16,PRDM16;PRDM16,PRDM16;PRDM16,PRDM16;PRDM16,PRDM16;PRDM16,PRDM16;PRDM16,PRDM16;PRDM16,PRDM16;PRDM16	NM_022114;NM_199454,NM_022114;NM_199454,NM_022114;NM_199454,NM_022114;NM_199454,NM_022114;NM_199454,NM_022114;NM_199454,NM_022114;NM_199454,NM_022114;NM_199454,NM_022114;NM_199454	hyperM.iPSC
1	3137482	3138670	4	cg21786372,cg07956247,cg14969646,cg05628625	Body;Body,Body;Body,Body;Body,Body;Body	N_Shore,Island,S_Shore,S_Shore	PRDM16;PRDM16,PRDM16;PRDM16,PRDM16;PRDM16,PRDM16;PRDM16	NM_022114;NM_199454,NM_022114;NM_199454,NM_022114;NM_199454,NM_022114;NM_199454	hyperM.iPSC
1	3145172	3145825	2	cg04509221,cg03082523	Body;Body,Body;Body	Island,N_Shore	PRDM16;PRDM16,PRDM16;PRDM16	NM_022114;NM_199454,NM_022114;NM_199454	hyperM.iPSC
1	3147181	3148943	4	cg11392550,cg00663575,cg08160128,cg24645149	Body;Body,Body;Body,Body;Body,Body;Body	N_Shore,Island,Island,S_Shore	PRDM16;PRDM16,PRDM16;PRDM16,PRDM16;PRDM16,PRDM16;PRDM16	NM_022114;NM_199454,NM_022114;NM_199454,NM_022114;NM_199454,NM_022114;NM_199454	hyperM.iPSC
1	3150599	3151308	2	cg23085167,cg22730864	Body;Body,Body;Body	N_Shelf,N_Shelf	PRDM16;PRDM16,PRDM16;PRDM16	NM_022114;NM_199454,NM_022114;NM_199454	hyperM.iPSC
1	3152314	3154502	7	cg12800122,cg27229529,cg10952596,cg19825974,cg10201191,cg22440573,cg21475097	Body;Body,Body;Body,Body;Body,Body;Body,Body;Body,Body;Body,Body;Body	N_Shore,N_Shore,N_Shore,N_Shore,N_Shore,Island,Island	PRDM16;PRDM16,PRDM16;PRDM16,PRDM16;PRDM16,PRDM16;PRDM16,PRDM16;PRDM16,PRDM16;PRDM16,PRDM16;PRDM16	NM_022114;NM_199454,NM_022114;NM_199454,NM_022114;NM_199454,NM_022114;NM_199454,NM_022114;NM_199454,NM_022114;NM_199454,NM_022114;NM_199454	hyperM.iPSC
1	3156459	3156572	2	cg20165545,cg19904265	Body;Body,Body;Body	S_Shore,S_Shelf	PRDM16;PRDM16,PRDM16;PRDM16	NM_022114;NM_199454,NM_022114;NM_199454	hyperM.iPSC
1	3181341	3182402	5	cg00329272,cg19263228,cg17601209,cg12660813,cg15357022	Body;Body,Body;Body,Body;Body,Body;Body,Body;Body	N_Shelf,N_Shelf,N_Shelf,N_Shelf,N_Shelf	PRDM16;PRDM16,PRDM16;PRDM16,PRDM16;PRDM16,PRDM16;PRDM16,PRDM16;PRDM16	NM_022114;NM_199454,NM_022114;NM_199454,NM_022114;NM_199454,NM_022114;NM_199454,NM_022114;NM_199454	hyperM.iPSC
1	3191718	3191813	2	cg01196079,cg17421241	Body;Body,Body;Body	N_Shore,N_Shore	PRDM16;PRDM16,PRDM16;PRDM16	NM_022114;NM_199454,NM_022114;NM_199454	hyperM.iPSC
1	3198725	3200284	4	cg21160149,cg00152878,cg14659814,cg24298696	Body;Body,Body;Body,Body;Body,Body;Body	_,_	PRDM16;PRDM16,PRDM16;PRDM16,PRDM16;PRDM16,PRDM16;PRDM16	NM_022114;NM_199454,NM_022114;NM_199454,NM_022114;NM_199454,NM_022114;NM_199454	hyperM.iPSC
1	3229572	3229852	3	cg12753787,cg18369939,cg11138362	Body;Body,Body;Body,Body;Body	N_Shore,Island,Island	PRDM16;PRDM16,PRDM16;PRDM16,PRDM16;PRDM16	NM_022114;NM_199454,NM_022114;NM_199454,NM_022114;NM_199454	hyperM.iPSC
1	3262522	3262592	2	cg06970772,cg13209113	Body;Body,Body;Body	N_Shelf,N_Shelf	PRDM16;PRDM16,PRDM16;PRDM16	NM_022114;NM_199454,NM_022114;NM_199454	hyperM.iPSC
1	3266273	3267483	6	cg27588093,cg06911744,cg26000536,cg01602345,cg21167817,cg01071314	Body;Body,Body;Body,Body;Body,Body;Body,Body;Body,Body;Body	S_Shore,S_Shore,S_Shore,S_Shelf,S_Shelf,S_Shelf	PRDM16;PRDM16,PRDM16;PRDM16,PRDM16;PRDM16,PRDM16;PRDM16,PRDM16;PRDM16,PRDM16;PRDM16	NM_022114;NM_199454,NM_022114;NM_199454,NM_022114;NM_199454,NM_022114;NM_199454,NM_022114;NM_199454,NM_022114;NM_199454	hyperM.iPSC
1	3272617	3273348	3	cg03126058,cg16686396,cg08831401	Body;Body,Body;Body,Body;Body	_,_	PRDM16;PRDM16,PRDM16;PRDM16,PRDM16;PRDM16	NM_022114;NM_199454,NM_022114;NM_199454,NM_022114;NM_199454	hyperM.iPSC
1	3294975	3296307	3	cg24878051,cg00251678,cg15059176	Body;Body,Body;Body,Body;Body	N_Shore,N_Shore,N_Shore	PRDM16;PRDM16,PRDM16;PRDM16,PRDM16;PRDM16	NM_022114;NM_199454,NM_022114;NM_199454,NM_022114;NM_199454	hyperM.iPSC
1	3309124	3309348	2	cg23999080,cg12635919	Body;Body,Body;Body	N_Shelf,N_Shore	PRDM16;PRDM16,PRDM16;PRDM16	NM_022114;NM_199454,NM_022114;NM_199454	hyperM.iPSC
1	3310525	3310598	2	cg17438636,cg01065697	Body;Body,Body;Body	N_Shore,N_Shore	PRDM16;PRDM16,PRDM16;PRDM16	NM_022114;NM_199454,NM_022114;NM_199454	hyperM.iPSC
1	3321138	3322565	4	cg17137218,cg02999781,cg10588310,cg17412901	Body;Body,Body;Body,Body;Body,Body;Body	Island,Island,Island,S_Shore	PRDM16;PRDM16,PRDM16;PRDM16,PRDM16;PRDM16,PRDM16;PRDM16	NM_022114;NM_199454,NM_022114;NM_199454,NM_022114;NM_199454,NM_022114;NM_199454	hyperM.iPSC
1	3329730	3330047	4	cg10248231,cg01913436,cg01261194,cg03748986	Body;Body,Body;Body,Body;Body,Body;Body	N_Shelf,N_Shore,N_Shore,N_Shore	PRDM16;PRDM16,PRDM16;PRDM16,PRDM16;PRDM16,PRDM16;PRDM16	NM_022114;NM_199454,NM_022114;NM_199454,NM_022114;NM_199454,NM_022114;NM_199454	hyperM.iPSC
1	3338431	3338675	2	cg11251399,cg11236641	Body;Body,Body;Body	N_Shelf,N_Shelf	PRDM16;PRDM16,PRDM16;PRDM16	NM_022114;NM_199454,NM_022114;NM_199454	hyperM.iPSC
1	3370110	3370148	2	cg03916277,cg24919884	Body,Body	_,_	ARHGEF16,ARHGEF16	NM_014448,NM_014448	hyperM.iPSC
1	3383873	3385118	5	cg01269514,cg26365786,cg17741539,cg09180894,cg12097441	Body,Body,Body,Body,Body	N_Shore,N_Shore,N_Shore,Island,S_Shore	ARHGEF16,ARHGEF16,ARHGEF16,ARHGEF16,ARHGEF16	NM_014448,NM_014448,NM_014448,NM_014448,NM_014448	hyperM.iPSC
1	3386203	3387481	3	cg18885125,cg24036039,cg10020040	Body,Body,3'UTR	S_Shore,S_Shore,S_Shelf	ARHGEF16,ARHGEF16,ARHGEF16	NM_014448,NM_014448,NM_014448	hyperM.iPSC
1	3410675	3410708	2	cg18024358,cg21156590	Body,Body	_,_	MEGF6,MEGF6	NM_001409,NM_001409	hyperM.iPSC
1	3425747	3425975	2	cg05641278,cg09230667	Body,Body	N_Shore,Island	MEGF6,MEGF6	NM_001409,NM_001409	hyperM.iPSC
1	3428723	3429551	2	cg26788812,cg00994251	Body,Body	S_Shelf,S_Shelf	MEGF6,MEGF6	NM_001409,NM_001409	hyperM.iPSC
1	3448164	3448437	2	cg02073224,cg22400959	Body,Body	N_Shore,N_Shore	MEGF6,MEGF6	NM_001409,NM_001409	hyperM.iPSC
1	3449809	3450128	3	cg06511312,cg27450668,cg22791030	Body,Body,Body	Island,Island,Island	MEGF6,MEGF6,MEGF6	NM_001409,NM_001409,NM_001409	hyperM.iPSC
1	3463525	3464236	2	cg02955098,cg12612393	Body,Body	_,_	MEGF6,MEGF6	NM_001409,NM_001409	hyperM.iPSC
1	3467152	3468076	4	cg06883956,cg15903571,cg07720540,cg01432902	Body;Body,Body;Body,Body;TSS200,Body;TSS1500	_,_	MEGF6;MIR551A,MEGF6;MIR551A,MEGF6;MIR551A,MEGF6;MIR551A	NM_001409;NR_030277,NM_001409;NR_030277,NM_001409;NR_030277,NM_001409;NR_030277	hyperM.iPSC
1	3513460	3514285	2	cg20769487,cg04549679	Body,Body	_,N_Shelf	MEGF6,MEGF6	NM_001409,NM_001409	hyperM.iPSC
1	3556823	3557023	4	cg11256802,cg04865841,cg18021902,cg22614891	TSS1500,TSS1500,TSS1500,TSS1500	Island,Island,Island,Island	WDR8,WDR8,WDR8,WDR8	NM_017818,NM_017818,NM_017818,NM_017818	hyperM.iPSC
1	3557579	3557730	3	cg10038618,cg24678611,cg01434649	TSS1500;TSS1500,TSS1500;TSS1500,TSS1500;TSS1500	Island,Island,Island	TP73;WDR8,TP73;WDR8,TP73;WDR8	NM_005427;NM_017818,NM_005427;NM_017818,NM_005427;NM_017818	hypoM.iPSC
1	3564564	3565534	3	cg05936300,cg20768358,cg04137576	5'UTR,5'UTR,5'UTR	_,_	TP73,TP73,TP73	NM_005427,NM_005427,NM_005427	hyperM.iPSC
1	3579722	3580780	3	cg04600984,cg22383924,cg27055894	5'UTR,5'UTR,5'UTR	_,_	TP73,TP73,TP73	NM_005427,NM_005427,NM_005427	hyperM.iPSC
1	3595839	3595942	3	cg24356964,cg23052055,cg00589002	TSS1500;TSS1500;Body;TSS1500,TSS1500;TSS1500;Body;TSS1500,TSS1500;TSS1500;Body;TSS1500	N_Shore,N_Shore,N_Shore	TP73;TP73;TP73;TP73,TP73;TP73;TP73;TP73,TP73;TP73;TP73;TP73	NM_001126240;NM_001126242;NM_005427;NM_001126241,NM_001126240;NM_001126242;NM_005427;NM_001126241,NM_001126240;NM_001126242;NM_005427;NM_001126241	hyperM.iPSC
1	3604050	3606358	4	cg18279180,cg14666108,cg23234149,cg22234529	Body;Body;Body;Body,Body;Body;Body;Body,Body;Body;Body;Body,Body;Body;Body;Body	_,_	TP73;TP73;TP73;TP73,TP73;TP73;TP73;TP73,TP73;TP73;TP73;TP73,TP73;TP73;TP73;TP73	NM_001126240;NM_005427;NM_001126242;NM_001126241,NM_001126240;NM_005427;NM_001126242;NM_001126241,NM_001126240;NM_005427;NM_001126242;NM_001126241,NM_001126240;NM_005427;NM_001126242;NM_001126241	hyperM.iPSC
1	3610078	3610875	3	cg07045089,cg00505606,cg19819912	Body;Body;Body;Body,Body;Body;Body;Body,Body;Body;Body;Body	N_Shelf,N_Shelf,N_Shelf	TP73;TP73;TP73;TP73,TP73;TP73;TP73;TP73,TP73;TP73;TP73;TP73	NM_001126240;NM_005427;NM_001126242;NM_001126241,NM_001126240;NM_005427;NM_001126242;NM_001126241,NM_001126240;NM_005427;NM_001126242;NM_001126241	hyperM.iPSC
1	3611945	3611990	2	cg04523603,cg26810690	Body;Body;Body;Body,Body;Body;Body;Body	N_Shore,N_Shore	TP73;TP73;TP73;TP73,TP73;TP73;TP73;TP73	NM_001126240;NM_005427;NM_001126242;NM_001126241,NM_001126240;NM_005427;NM_001126242;NM_001126241	hyperM.iPSC
1	3613249	3613465	2	cg05782471,cg21418707	Body;Body;Body;Body,Body;Body;Body;Body	Island,S_Shore	TP73;TP73;TP73;TP73,TP73;TP73;TP73;TP73	NM_001126240;NM_005427;NM_001126242;NM_001126241,NM_001126240;NM_005427;NM_001126242;NM_001126241	hyperM.iPSC
1	3615172	3615269	2	cg14660788,cg12268562	Body;Body;Body;Body,Body;Body;Body;Body	S_Shore,S_Shore	TP73;TP73;TP73;TP73,TP73;TP73;TP73;TP73	NM_001126240;NM_005427;NM_001126242;NM_001126241,NM_001126240;NM_005427;NM_001126242;NM_001126241	hyperM.iPSC
1	3679379	3680354	3	cg00965121,cg01535630,cg09850012	5'UTR,5'UTR,5'UTR	Island,Island,S_Shore	LOC388588,LOC388588,LOC388588	NM_001163724,NM_001163724,NM_001163724	hyperM.iPSC
1	3728194	3728368	2	cg25729560,cg04018879	Body,Body	_,_	KIAA0562,KIAA0562	NM_014704,NM_014704	hypoM.iPSC
1	3764687	3764718	3	cg22157494,cg22671931,cg06178315	TSS1500;Body,TSS1500;Body,TSS1500;Body	N_Shore,N_Shore,N_Shore	KIAA0562;DFFB,KIAA0562;DFFB,KIAA0562;DFFB	NM_014704;NM_004402,NM_014704;NM_004402,NM_014704;NM_004402	hyperM.iPSC
1	3816925	3817511	2	cg09362969,cg24432048	Body,Body	S_Shelf,S_Shelf	LOC100133612,LOC100133612	NR_024455,NR_024455	hyperM.iPSC
1	3899985	3900460	3	cg25468905,cg00647233,cg26233172	_,_	_,_	_,_	_,_	hyperM.iPSC
1	3968330	3968401	2	cg26910994,cg17876128	_,_	_,_	_,_	_,_	hyperM.iPSC
1	3987042	3987536	2	cg25469923,cg20703997	_,_	_,_	_,_	_,_	hyperM.iPSC
1	4092677	4094272	4	cg21813377,cg13224197,cg04902529,cg06529149	_,_	Island,Island,S_Shore,S_Shore	_,_	_,_	hyperM.iPSC
1	4121476	4122171	2	cg07425646,cg03972745	_,_	Island,S_Shore	_,_	_,_	hyperM.iPSC
1	4561279	4562008	2	cg09278610,cg15645728	_,_	_,_	_,_	_,_	hyperM.iPSC
1	4597779	4597827	2	cg16512885,cg24037938	_,_	_,_	_,_	_,_	hyperM.iPSC
1	4618072	4618433	2	cg26599630,cg22367872	Body;Body,Body;Body	S_Shore,S_Shelf	AJAP1;AJAP1,AJAP1;AJAP1	NM_018836;NM_001042478,NM_018836;NM_001042478	hyperM.iPSC
1	4693971	4694872	3	cg27181471,cg04110918,cg13480658	Body;Body,Body;Body,Body;Body	_,_	AJAP1;AJAP1,AJAP1;AJAP1,AJAP1;AJAP1	NM_018836;NM_001042478,NM_018836;NM_001042478,NM_018836;NM_001042478	hyperM.iPSC
1	4730304	4731060	2	cg23015920,cg02411275	Body;Body,Body;Body	N_Shore,N_Shore	AJAP1;AJAP1,AJAP1;AJAP1	NM_018836;NM_001042478,NM_018836;NM_001042478	hyperM.iPSC
1	5256331	5256438	2	cg19158553,cg24305579	_,_	_,_	_,_	_,_	hyperM.iPSC
1	5462722	5463537	4	cg25065518,cg12527097,cg16173186,cg06371555	_,_	_,_	_,_	_,_	hyperM.iPSC
1	5508734	5508944	2	cg06642219,cg10620434	_,_	_,_	_,_	_,_	hyperM.iPSC
1	5701750	5701824	2	cg11596090,cg24834921	_,_	_,_	_,_	_,_	hyperM.iPSC
1	5818637	5819240	4	cg23619890,cg13133560,cg09317508,cg19500334	_,_	_,_	_,_	_,_	hyperM.iPSC
1	5829989	5830033	2	cg12041830,cg07928086	_,_	_,_	_,_	_,_	hyperM.iPSC
1	5840353	5840432	2	cg24864189,cg24883265	_,_	_,_	_,_	_,_	hyperM.iPSC
1	6008386	6009239	6	cg01934408,cg18192083,cg03400374,cg19814116,cg05701590,cg06753281	TSS1500;TSS1500,TSS200;TSS200,TSS200;TSS200,1stExon;1stExon;5'UTR;5'UTR,1stExon;1stExon;5'UTR;5'UTR,5'UTR;5'UTR	N_Shore,Island,Island,Island,Island,S_Shore	KCNAB2;KCNAB2,KCNAB2;KCNAB2,KCNAB2;KCNAB2,KCNAB2;KCNAB2;KCNAB2;KCNAB2,KCNAB2;KCNAB2;KCNAB2;KCNAB2,KCNAB2;KCNAB2	NM_003636;NM_172130,NM_003636;NM_172130,NM_003636;NM_172130,NM_172130;NM_003636;NM_003636;NM_172130,NM_172130;NM_003636;NM_003636;NM_172130,NM_003636;NM_172130	hyperM.iPSC
1	6016792	6016848	2	cg25220769,cg19734433	5'UTR;5'UTR,5'UTR;5'UTR	_,_	KCNAB2;KCNAB2,KCNAB2;KCNAB2	NM_003636;NM_172130,NM_003636;NM_172130	hypoM.iPSC
1	6081230	6081278	2	cg16053064,cg12705326	3'UTR;3'UTR,3'UTR;3'UTR	_,_	KCNAB2;KCNAB2,KCNAB2;KCNAB2	NM_172130;NM_003636,NM_172130;NM_003636	hyperM.iPSC
1	6086607	6087322	2	cg13103815,cg05382282	3'UTR,3'UTR	_,_	CHD5,CHD5	NM_015557,NM_015557	hyperM.iPSC
1	6114457	6114466	2	cg15125762,cg05371688	Body,Body	S_Shelf,S_Shelf	CHD5,CHD5	NM_015557,NM_015557	hyperM.iPSC
1	6127912	6128005	2	cg11069824,cg15727545	Body,Body	N_Shelf,N_Shelf	CHD5,CHD5	NM_015557,NM_015557	hyperM.iPSC
1	6187807	6187887	2	cg19180828,cg15584788	TSS1500,TSS1500	N_Shore,N_Shore	RNF207,RNF207	NM_207396,NM_207396	hypoM.iPSC
1	6188481	6189340	2	cg17515966,cg27307298	TSS1500,Body	Island,Island	RNF207,RNF207	NM_207396,NM_207396	hyperM.iPSC
1	6225866	6226380	2	cg00769305,cg18564053	TSS1500,TSS1500	N_Shore,N_Shore	HES3,HES3	NM_001024598,NM_001024598	hyperM.iPSC
1	6261181	6261399	2	cg08679807,cg04354126	Body;Body;Body;Body,Body;Body;Body;Body	N_Shore,N_Shore	ACOT7;ACOT7;ACOT7;ACOT7,ACOT7;ACOT7;ACOT7;ACOT7	NM_181864;NM_181865;NM_007274;NM_181866,NM_181864;NM_181865;NM_007274;NM_181866	hyperM.iPSC
1	6312640	6313417	6	cg13549940,cg18167466,cg25706257,cg10976772,cg00081799,cg16170708	Body;Body;Body;Body,Body;Body;Body;Body,Body;Body;Body;Body,Body;Body;Body;Body,Body;Body;Body;Body,Body;Body;Body;Body	_,_	ACOT7;ACOT7;ACOT7;ACOT7,ACOT7;ACOT7;ACOT7;ACOT7,ACOT7;ACOT7;ACOT7;ACOT7,ACOT7;ACOT7;ACOT7;ACOT7,ACOT7;ACOT7;ACOT7;ACOT7,ACOT7;ACOT7;ACOT7;ACOT7	NM_181864;NM_181865;NM_007274;NM_181866,NM_181864;NM_181865;NM_007274;NM_181866,NM_181864;NM_181865;NM_007274;NM_181866,NM_181864;NM_181865;NM_007274;NM_181866,NM_181864;NM_181865;NM_007274;NM_181866,NM_181864;NM_181865;NM_007274;NM_181866	hyperM.iPSC
1	6376913	6376926	2	cg25165880,cg09273516	TSS1500,TSS1500	S_Shore,S_Shore	ACOT7,ACOT7	NM_007274,NM_007274	hyperM.iPSC
1	6406594	6407788	3	cg19253827,cg09549827,cg24153044	TSS1500,TSS1500,1stExon	N_Shore,Island,Island	ESPN,ESPN,ESPN	NM_031475,NM_031475,NM_031475	hyperM.iPSC
1	6437192	6438911	7	cg10210806,cg06085683,cg00158227,cg00833822,cg26419880,cg12143651,cg07017737	Body,Body,Body,Body,Body,Body,Body	Island,Island,Island,Island,Island,Island,Island	ESPN,ESPN,ESPN,ESPN,ESPN,ESPN,ESPN	NM_031475,NM_031475,NM_031475,NM_031475,NM_031475,NM_031475,NM_031475	hyperM.iPSC
1	6443708	6445192	5	cg23449295,cg11404945,cg10982045,cg13331246,cg15358431	_,3'UTR;3'UTR;3'UTR;3'UTR;3'UTR,Body;Body;Body;Body;Body,Body;Body;Body;Body;Body	Island,Island,Island,Island,S_Shore	_,TNFRSF25;TNFRSF25;TNFRSF25;TNFRSF25;TNFRSF25,TNFRSF25;TNFRSF25;TNFRSF25;TNFRSF25;TNFRSF25,TNFRSF25;TNFRSF25;TNFRSF25;TNFRSF25;TNFRSF25	_,NM_148970;NM_148966;NM_148965;NM_148967;NM_003790,NM_148967;NM_003790;NM_148970;NM_148966;NM_148965,NM_148967;NM_003790;NM_148970;NM_148966;NM_148965	hyperM.iPSC
1	6537362	6538097	5	cg09513309,cg09132215,cg00741410,cg23963591,cg24105407	TSS1500;TSS1500;TSS200;TSS1500;TSS1500,TSS200;TSS200;TSS200;TSS1500;TSS200,TSS200;TSS200;TSS200;TSS1500;TSS200,TSS200;TSS200;TSS200;TSS1500;TSS200,1stExon;1stExon;1stExon;TSS1500;1stExon	Island,S_Shore,S_Shore,S_Shore,S_Shore	TAS1R1;TAS1R1;NOL9;TAS1R1;TAS1R1,TAS1R1;TAS1R1;TAS1R1;NOL9;TAS1R1,TAS1R1;TAS1R1;TAS1R1;NOL9;TAS1R1,TAS1R1;TAS1R1;TAS1R1;NOL9;TAS1R1,TAS1R1;TAS1R1;TAS1R1;NOL9;TAS1R1	NM_177541;NM_138697;NM_024654;NM_177540;NM_177539,NM_138697;NM_177539;NM_177540;NM_024654;NM_177541,NM_138697;NM_177539;NM_177540;NM_024654;NM_177541,NM_138697;NM_177539;NM_177540;NM_024654;NM_177541,NM_138697;NM_177539;NM_177540;NM_024654;NM_177541	hyperM.iPSC
1	6608522	6608583	2	cg17946470,cg08163621	Body,Body	S_Shore,S_Shore	THAP3,THAP3	NM_138350,NM_138350	hyperM.iPSC
1	6753559	6754306	2	cg26250086,cg16585946	_,_	_,_	_,_	_,_	hyperM.iPSC
1	7033771	7033903	3	cg17143900,cg07605269,cg05381287	Body,Body,Body	_,_	CAMTA1,CAMTA1,CAMTA1	NM_015215,NM_015215,NM_015215	hyperM.iPSC
1	7042691	7043480	2	cg05710479,cg06149271	Body,Body	N_Shelf,N_Shore	CAMTA1,CAMTA1	NM_015215,NM_015215	hyperM.iPSC
1	7107174	7107370	2	cg04980002,cg10332321	Body,Body	_,_	CAMTA1,CAMTA1	NM_015215,NM_015215	hyperM.iPSC
1	7132574	7133535	2	cg14836248,cg03765258	Body,Body	_,_	CAMTA1,CAMTA1	NM_015215,NM_015215	hyperM.iPSC
1	7230599	7230953	2	cg17079374,cg20800117	Body,Body	_,_	CAMTA1,CAMTA1	NM_015215,NM_015215	hyperM.iPSC
1	7233719	7233763	2	cg24999973,cg12097989	Body,Body	_,_	CAMTA1,CAMTA1	NM_015215,NM_015215	hyperM.iPSC
1	7331380	7331590	3	cg10626316,cg14794741,cg25345659	Body,Body,Body	_,_	CAMTA1,CAMTA1,CAMTA1	NM_015215,NM_015215,NM_015215	hyperM.iPSC
1	7454306	7454798	2	cg02275084,cg13202213	Body,Body	_,_	CAMTA1,CAMTA1	NM_015215,NM_015215	hyperM.iPSC
1	7614908	7614954	3	cg09889997,cg03762572,cg06800235	Body,Body,Body	_,_	CAMTA1,CAMTA1,CAMTA1	NM_015215,NM_015215,NM_015215	hyperM.iPSC
1	7836254	7836459	2	cg20625138,cg12606891	TSS1500;TSS200,TSS1500;TSS1500	_,_	UTS2;UTS2,UTS2;UTS2	NM_006786;NM_021995,NM_006786;NM_021995	hyperM.iPSC
1	7923614	7923633	2	cg14153654,cg18025409	TSS200,TSS200	N_Shore,N_Shore	TNFRSF9,TNFRSF9	NM_001561,NM_001561	hyperM.iPSC
1	7936561	7937237	6	cg24251814,cg21814278,cg12045833,cg02737782,cg04112961,cg11518359	_,_	N_Shore,Island,Island,Island,Island,Island	_,_	_,_	hyperM.iPSC
1	8010008	8010105	2	cg22678073,cg13808198	TSS1500,TSS1500	S_Shore,S_Shore	ERRFI1,ERRFI1	NM_018948,NM_018948	hypoM.iPSC
1	8194505	8194786	3	cg20014974,cg00590817,cg12700319	_,_	N_Shore,Island,Island	_,_	_,_	hyperM.iPSC
1	8215165	8215244	2	cg11166167,cg07021405	_,_	_,_	_,_	_,_	hyperM.iPSC
1	8265858	8266162	2	cg13089904,cg00059459	_,_	_,_	_,_	_,_	hyperM.iPSC
1	8300455	8301125	2	cg12907988,cg14851757	_,_	Island,S_Shore	_,_	_,_	hyperM.iPSC
1	8326218	8326637	4	cg11189357,cg26411522,cg07123038,cg04994795	Body,Body,Body,Body	N_Shore,Island,Island,Island	SLC45A1,SLC45A1,SLC45A1,SLC45A1	NM_001080397,NM_001080397,NM_001080397,NM_001080397	hyperM.iPSC
1	8334745	8335346	2	cg03989270,cg18184092	_,3'UTR;3'UTR;3'UTR	_,_	_,RERE;RERE;RERE	_,NM_012102;NM_001042681;NM_001042682	hyperM.iPSC
1	8380004	8380345	2	cg05045335,cg20316440	5'UTR;Body;Body,5'UTR;Body;Body	_,_	RERE;RERE;RERE,RERE;RERE;RERE	NM_001042682;NM_012102;NM_001042681,NM_001042682;NM_012102;NM_001042681	hyperM.iPSC
1	9020009	9020622	2	cg07247610,cg00113315	3'UTR;Body,Body;Body	N_Shore,N_Shore	SLC2A5;SLC2A5,SLC2A5;SLC2A5	NM_003039;NR_024180,NM_003039;NR_024180	hyperM.iPSC
1	9021868	9022341	4	cg02497830,cg04885068,cg26032244,cg09859080	Body;Body,Body;Body,Body;Body,Body;Body	Island,Island,Island,Island	SLC2A5;SLC2A5,SLC2A5;SLC2A5,SLC2A5;SLC2A5,SLC2A5;SLC2A5	NM_003039;NR_024180,NM_003039;NR_024180,NM_003039;NR_024180,NM_003039;NR_024180	hyperM.iPSC
1	9052074	9052378	4	cg03679305,cg12763828,cg00310940,cg24480859	Body;Body;Body,5'UTR;5'UTR;1stExon;1stExon;Body,5'UTR;5'UTR;1stExon;1stExon;Body,5'UTR;5'UTR;1stExon;1stExon;Body	N_Shelf,N_Shore,N_Shore,N_Shore	SLC2A5;SLC2A5;SLC2A5,SLC2A5;SLC2A5;SLC2A5;SLC2A5;SLC2A5,SLC2A5;SLC2A5;SLC2A5;SLC2A5;SLC2A5,SLC2A5;SLC2A5;SLC2A5;SLC2A5;SLC2A5	NM_003039;NM_001135585;NR_024180,NM_003039;NM_001135585;NM_003039;NM_001135585;NR_024180,NM_003039;NM_001135585;NM_003039;NM_001135585;NR_024180,NM_003039;NM_001135585;NM_003039;NM_001135585;NR_024180	hyperM.iPSC
1	9071613	9072321	2	cg23737366,cg16104584	TSS1500,TSS1500	_,_	SLC2A5,SLC2A5	NR_024180,NR_024180	hyperM.iPSC
1	9134423	9135108	2	cg00909706,cg04329551	TSS200,TSS1500	_,_	MIR34A,MIR34A	NR_029610,NR_029610	hyperM.iPSC
1	9146590	9146963	3	cg10377510,cg22373770,cg16102739	_,_	_,_	_,_	_,_	hyperM.iPSC
1	9263003	9263170	2	cg01102307,cg09869882	_,_	_,_	_,_	_,_	hyperM.iPSC
1	9298214	9298626	2	cg06779253,cg17489312	5'UTR,5'UTR	_,_	SPSB1,SPSB1	NM_025106,NM_025106	hyperM.iPSC
1	9331936	9332920	2	cg25616787,cg07173218	5'UTR,5'UTR	_,_	SPSB1,SPSB1	NM_025106,NM_025106	hyperM.iPSC
1	9411293	9412021	2	cg03605773,cg03003073	_,_	N_Shore,S_Shore	_,_	_,_	hyperM.iPSC
1	9521654	9521843	2	cg18783781,cg25369015	TSS1500,TSS1500	N_Shore,N_Shore	SLC25A33,SLC25A33	NM_032315,NM_032315	hypoM.iPSC
1	9609110	9610058	2	cg17467525,cg16014412	_,_	N_Shore,S_Shore	_,_	_,_	hyperM.iPSC
1	9635515	9635871	3	cg10050900,cg07793148,cg18284427	Body;5'UTR,Body;5'UTR,Body;5'UTR	Island,Island,S_Shore	C1orf200;PIK3CD,C1orf200;PIK3CD,C1orf200;PIK3CD	NR_027045;NM_005026,NR_027045;NM_005026,NR_027045;NM_005026	hyperM.iPSC
1	10162604	10163358	3	cg27508545,cg23661000,cg06758477	3'UTR;3'UTR,3'UTR;3'UTR,3'UTR;3'UTR	_,_	UBE4B;UBE4B,UBE4B;UBE4B,UBE4B;UBE4B	NM_006048;NM_001105562,NM_006048;NM_001105562,NM_006048;NM_001105562	hyperM.iPSC
1	10412612	10412711	4	cg09242541,cg05038881,cg13803915,cg15494174	TSS200;TSS1500;TSS200,TSS200;TSS1500;TSS200,TSS200;TSS1500;TSS200,TSS200;TSS1500;TSS200	N_Shore,N_Shore,N_Shore,N_Shore	APITD1;APITD1;APITD1,APITD1;APITD1;APITD1,APITD1;APITD1;APITD1,APITD1;APITD1;APITD1	NM_198544;NM_199295;NM_199294,NM_198544;NM_199295;NM_199294,NM_198544;NM_199295;NM_199294,NM_198544;NM_199295;NM_199294	hyperM.iPSC
1	10513068	10513259	2	cg10777461,cg22515654	Body,Body	_,_	PEX14,PEX14	NM_004565,NM_004565	hypoM.iPSC
1	10523976	10524420	4	cg12806121,cg09165170,cg00804803,cg24294013	Body,Body,Body,Body	_,_	PEX14,PEX14,PEX14,PEX14	NM_004565,NM_004565,NM_004565,NM_004565	hypoM.iPSC
1	10598877	10599421	3	cg26919387,cg18274984,cg04607379	Body,Body,Body	_,_	PEX14,PEX14,PEX14	NM_004565,NM_004565,NM_004565	hypoM.iPSC
1	10631772	10634282	9	cg16346321,cg18878351,cg19706390,cg09415955,cg22508928,cg19370715,cg27170141,cg10816626,cg15597109	Body;Body,Body;Body,Body;Body,Body;Body,Body;Body,Body;Body,Body;Body,Body;Body,Body;Body	S_Shore,S_Shore,S_Shore,S_Shore,S_Shore,N_Shelf,N_Shelf,N_Shelf,N_Shelf	CASZ1;CASZ1,CASZ1;CASZ1,CASZ1;CASZ1,CASZ1;CASZ1,CASZ1;CASZ1,CASZ1;CASZ1,CASZ1;CASZ1,CASZ1;CASZ1,CASZ1;CASZ1	NM_017766;NM_001079843,NM_017766;NM_001079843,NM_017766;NM_001079843,NM_017766;NM_001079843,NM_017766;NM_001079843,NM_017766;NM_001079843,NM_017766;NM_001079843,NM_017766;NM_001079843,NM_017766;NM_001079843	hypoM.iPSC
1	10645761	10646217	2	cg15490335,cg15031409	Body;Body,Body;Body	N_Shelf,N_Shore	CASZ1;CASZ1,CASZ1;CASZ1	NM_017766;NM_001079843,NM_017766;NM_001079843	hyperM.iPSC
1	10655051	10655487	3	cg16926809,cg00925802,cg09179249	Body;Body,Body;Body,Body;Body	_,_	CASZ1;CASZ1,CASZ1;CASZ1,CASZ1;CASZ1	NM_017766;NM_001079843,NM_017766;NM_001079843,NM_017766;NM_001079843	hyperM.iPSC
1	10687099	10687483	2	cg07589381,cg04149978	5'UTR;5'UTR,5'UTR;5'UTR	Island,Island	CASZ1;CASZ1,CASZ1;CASZ1	NM_001079843;NM_017766,NM_001079843;NM_017766	hypoM.iPSC
1	11035563	11035667	2	cg18947360,cg14853169	_,_	_,_	_,_	_,_	hyperM.iPSC
1	11082741	11082792	2	cg15139248,cg03617456	TSS1500;TSS1500,TSS1500;TSS1500	S_Shore,S_Shore	EXOSC10;EXOSC10,EXOSC10;EXOSC10	NM_001001998;NM_002685,NM_001001998;NM_002685	hyperM.iPSC
1	11484084	11485512	6	cg24371425,cg08243619,cg10116490,cg13863764,cg09573658,cg09265940	Body,Body,Body,Body,Body,Body	Island,Island,Island,Island,Island,S_Shore	PTCHD2,PTCHD2,PTCHD2,PTCHD2,PTCHD2,PTCHD2	NM_020780,NM_020780,NM_020780,NM_020780,NM_020780,NM_020780	hyperM.iPSC
1	11516514	11517199	2	cg06951112,cg09790470	Body,Body	N_Shelf,N_Shore	PTCHD2,PTCHD2	NM_020780,NM_020780	hyperM.iPSC
1	11636230	11636841	4	cg19747992,cg05796704,cg22697136,cg01420388	TSS1500;Body;TSS1500;TSS1500;TSS1500,TSS1500;Body;TSS1500;TSS1500;TSS1500,TSS1500;Body;TSS1500;TSS200;TSS1500,TSS1500;Body;TSS1500;TSS200;TSS1500	N_Shore,Island,Island,Island	FBXO44;FBXO2;FBXO44;FBXO44;FBXO44,FBXO44;FBXO2;FBXO44;FBXO44;FBXO44,FBXO44;FBXO2;FBXO44;FBXO44;FBXO44,FBXO44;FBXO2;FBXO44;FBXO44;FBXO44	NM_183413;NM_012168;NM_183412;NM_033182;NM_001014765,NM_183413;NM_012168;NM_183412;NM_033182;NM_001014765,NM_183413;NM_012168;NM_033182;NM_183412;NM_001014765,NM_183413;NM_012168;NM_033182;NM_183412;NM_001014765	hypoM.iPSC
1	11646727	11647530	4	cg19741456,cg24597705,cg04476741,cg24881202	TSS200,5'UTR,5'UTR,5'UTR	Island,Island,Island,S_Shore	FBXO6,FBXO6,FBXO6,FBXO6	NM_018438,NM_018438,NM_018438,NM_018438	hyperM.iPSC
1	11684284	11684353	2	cg13569079,cg20946054	5'UTR,5'UTR	_,_	C1orf187,C1orf187	NM_198545,NM_198545	hyperM.iPSC
1	11701913	11702390	3	cg26437845,cg24724832,cg21106899	Body,Body,3'UTR	N_Shore,N_Shore,Island	C1orf187,C1orf187,C1orf187	NM_198545,NM_198545,NM_198545	hyperM.iPSC
1	11830573	11830934	6	cg20202438,cg25341925,cg05396397,cg06193043,cg14194983,cg24844545	TSS200,TSS1500,TSS1500,TSS1500,TSS1500,TSS1500	_,_	NPPA,NPPA,NPPA,NPPA,NPPA,NPPA	NM_006172,NM_006172,NM_006172,NM_006172,NM_006172,NM_006172	hyperM.iPSC
1	11841633	11841682	2	cg26614504,cg13885623	TSS200,TSS200	N_Shore,N_Shore	NPPB,NPPB	NM_002521,NM_002521	hyperM.iPSC
1	11909321	11909429	2	cg22932223,cg07603449	TSS1500,TSS1500	S_Shore,S_Shore	KIAA2013,KIAA2013	NM_138346,NM_138346	hyperM.iPSC
1	11916972	11917677	2	cg11469137,cg23286660	TSS1500,Body	N_Shore,S_Shore	PLOD1,PLOD1	NM_000302,NM_000302	hyperM.iPSC
1	11962299	11962704	2	cg09820729,cg26784491	TSS1500;TSS1500,TSS200;TSS200	N_Shore,Island	MFN2;MFN2,MFN2;MFN2	NM_014874;NM_001127660,NM_001127660;NM_014874	hyperM.iPSC
1	12087044	12087064	2	cg17801840,cg20274267	Body,Body	_,_	TNFRSF8,TNFRSF8	NM_001243,NM_001243	hyperM.iPSC
1	12126158	12126683	3	cg09247175,cg24492058,cg06853894	3'UTR;3'UTR,3'UTR;3'UTR,3'UTR;3'UTR	_,_	TNFRSF8;TNFRSF8,TNFRSF8;TNFRSF8,TNFRSF8;TNFRSF8	NM_001243;NM_152942,NM_001243;NM_152942,NM_001243;NM_152942	hyperM.iPSC
1	12150004	12150514	4	cg22337605,cg26189983,cg00155063,cg09557991	Body,Body,Body,Body	Island,Island,S_Shore,S_Shore	TNFRSF1B,TNFRSF1B,TNFRSF1B,TNFRSF1B	NM_001066,NM_001066,NM_001066,NM_001066	hyperM.iPSC
1	12160977	12161133	2	cg22677556,cg15526535	Body,Body	_,_	TNFRSF1B,TNFRSF1B	NM_001066,NM_001066	hyperM.iPSC
1	12213227	12213926	2	cg11726754,cg00384847	5'UTR;5'UTR,5'UTR;5'UTR	N_Shore,S_Shore	VPS13D;VPS13D,VPS13D;VPS13D	NM_018156;NM_015378,NM_018156;NM_015378	hyperM.iPSC
1	12460928	12461265	3	cg11217193,cg13466988,cg05654304	Body;Body,Body;Body,Body;Body	_,_	VPS13D;VPS13D,VPS13D;VPS13D,VPS13D;VPS13D	NM_015378;NM_018156,NM_015378;NM_018156,NM_015378;NM_018156	hyperM.iPSC
1	12531895	12532544	3	cg07143158,cg04943879,cg01017395	_,_	_,_	_,_	_,_	hyperM.iPSC
1	12626451	12626594	3	cg11157076,cg09518518,cg06751920	TSS1500,TSS1500,TSS1500	_,_	AADACL4,AADACL4,AADACL4	NM_001013630,NM_001013630,NM_001013630	hyperM.iPSC
1	12697402	12697491	2	cg04505750,cg19620994	TSS1500;TSS1500,TSS1500;TSS1500	_,_	AADACL3;AADACL3,AADACL3;AADACL3	NM_001103170;NM_001103169,NM_001103170;NM_001103169	hyperM.iPSC
1	12698747	12698793	2	cg00254956,cg12639866	5'UTR;5'UTR;1stExon;1stExon,5'UTR;5'UTR;1stExon;1stExon	_,_	AADACL3;AADACL3;AADACL3;AADACL3,AADACL3;AADACL3;AADACL3;AADACL3	NM_001103170;NM_001103169;NM_001103169;NM_001103170,NM_001103170;NM_001103169;NM_001103169;NM_001103170	hyperM.iPSC
1	12757329	12757832	2	cg11737871,cg13394110	TSS1500,1stExon	_,_	PRAMEF12,PRAMEF12	NM_001080830,NM_001080830	hyperM.iPSC
1	13759290	13759442	2	cg17840367,cg11677705	_,_	_,_	_,_	_,_	hyperM.iPSC
1	13782109	13782408	3	cg16590190,cg00831909,cg25286482	TSS1500;TSS1500,TSS1500;TSS1500,TSS1500;TSS1500	N_Shore,Island,Island	PDPN;PDPN,PDPN;PDPN,PDPN;PDPN	NM_006474;NM_198389,NM_006474;NM_198389,NM_006474;NM_198389	hypoM.iPSC
1	13900108	13900168	3	cg24550112,cg16680547,cg26608693	5'UTR,5'UTR,5'UTR	S_Shore,S_Shore,S_Shore	PRDM2,PRDM2,PRDM2	NM_001135610,NM_001135610,NM_001135610	hyperM.iPSC
1	13978093	13978194	2	cg16911819,cg12909925	Body;Body;Body;Body,Body;Body;Body;Body	_,_	PRDM2;PRDM2;PRDM2;PRDM2,PRDM2;PRDM2;PRDM2;PRDM2	NM_001007257;NM_012231;NM_015866;NM_001135610,NM_001007257;NM_012231;NM_015866;NM_001135610	hyperM.iPSC
1	14092709	14093201	3	cg14615440,cg08482465,cg19621427	_,_	S_Shore,S_Shore,S_Shore	_,_	_,_	hyperM.iPSC
1	14796664	14797299	3	cg11964773,cg12873454,cg06940705	TSS1500;TSS1500,TSS1500;TSS1500,TSS1500;TSS1500	N_Shore,Island,Island	KIAA1026;KIAA1026,KIAA1026;KIAA1026,KIAA1026;KIAA1026	NM_015209;NM_201628,NM_015209;NM_201628,NM_015209;NM_201628	hypoM.iPSC
1	14940759	14941553	2	cg16985952,cg00101629	Body;Body,Body;Body	_,_	KIAA1026;KIAA1026,KIAA1026;KIAA1026	NM_201628;NM_015209,NM_201628;NM_015209	hyperM.iPSC
1	15047873	15047943	2	cg15733729,cg02232840	Body;Body,Body;Body	_,_	KIAA1026;KIAA1026,KIAA1026;KIAA1026	NM_201628;NM_015209,NM_201628;NM_015209	hyperM.iPSC
1	15122461	15122796	2	cg20958628,cg23280013	Body;Body;TSS1500,Body;Body;TSS1500	N_Shore,N_Shore	KIAA1026;KIAA1026;KIAA1026,KIAA1026;KIAA1026;KIAA1026	NM_201628;NM_015209;NM_001018000,NM_201628;NM_015209;NM_001018000	hypoM.iPSC
1	15128714	15128809	3	cg19520372,cg13239126,cg19710662	Body;TSS200;Body;Body,Body;TSS200;Body;Body,Body;TSS200;Body;Body	_,_	KIAA1026;KIAA1026;KIAA1026;KIAA1026,KIAA1026;KIAA1026;KIAA1026;KIAA1026,KIAA1026;KIAA1026;KIAA1026;KIAA1026	NM_201628;NM_001018001;NM_015209;NM_001018000,NM_201628;NM_001018001;NM_015209;NM_001018000,NM_201628;NM_001018001;NM_015209;NM_001018000	hyperM.iPSC
1	15144695	15144913	3	cg16663033,cg11648522,cg26577320	Body;5'UTR;TSS1500;Body;Body,TSS200;Body;5'UTR;Body;Body,TSS200;Body;5'UTR;Body;Body	_,_	KIAA1026;KIAA1026;KIAA1026;KIAA1026;KIAA1026,KIAA1026;KIAA1026;KIAA1026;KIAA1026;KIAA1026,KIAA1026;KIAA1026;KIAA1026;KIAA1026;KIAA1026	NM_201628;NM_001018001;NM_001017999;NM_015209;NM_001018000,NM_001017999;NM_201628;NM_001018001;NM_015209;NM_001018000,NM_001017999;NM_201628;NM_001018001;NM_015209;NM_001018000	hyperM.iPSC
1	15413769	15414033	4	cg21005438,cg11741753,cg19505659,cg26027853	5'UTR;5'UTR;5'UTR;5'UTR,5'UTR;5'UTR;5'UTR;5'UTR,5'UTR;5'UTR;5'UTR;5'UTR,5'UTR;5'UTR;5'UTR;5'UTR	Island,Island,Island,Island	TMEM51;TMEM51;TMEM51;TMEM51,TMEM51;TMEM51;TMEM51;TMEM51,TMEM51;TMEM51;TMEM51;TMEM51,TMEM51;TMEM51;TMEM51;TMEM51	NM_001136218;NM_018022;NM_001136216;NM_001136217,NM_001136218;NM_018022;NM_001136216;NM_001136217,NM_001136218;NM_018022;NM_001136216;NM_001136217,NM_001136218;NM_018022;NM_001136216;NM_001136217	hyperM.iPSC
1	15522855	15523035	2	cg10515414,cg10055277	Body,Body	_,_	FHAD1,FHAD1	NM_052929,NM_052929	hyperM.iPSC
1	15528351	15528673	3	cg00702647,cg09252331,cg07312051	Body,Body,Body	_,_	FHAD1,FHAD1,FHAD1	NM_052929,NM_052929,NM_052929	hyperM.iPSC
1	15584030	15584606	2	cg00970752,cg11395890	Body,Body	_,_	FHAD1,FHAD1	NM_052929,NM_052929	hypoM.iPSC
1	15606431	15606872	2	cg03048488,cg27582527	_,_	N_Shelf,N_Shore	_,_	_,_	hyperM.iPSC
1	15674530	15675198	3	cg19505194,cg25021182,cg24030609	TSS1500,TSS200,5'UTR;1stExon	_,_	CELA2B,CELA2B,CELA2B;CELA2B	NM_015849,NM_015849,NM_015849;NM_015849	hyperM.iPSC
1	15934948	15935709	2	cg05337019,cg26923754	TSS1500,1stExon	S_Shelf,_	SLC25A34,SLC25A34	NM_207348,NM_207348	hyperM.iPSC
1	15963687	15963736	2	cg06747907,cg12068257	5'UTR;5'UTR;TSS1500;1stExon,5'UTR;5'UTR;TSS1500;1stExon	_,_	FBLIM1;FBLIM1;FBLIM1;FBLIM1,FBLIM1;FBLIM1;FBLIM1;FBLIM1	NM_001024215;NM_017556;NM_001024216;NM_001024215,NM_001024215;NM_017556;NM_001024216;NM_001024215	hyperM.iPSC
1	16036554	16036709	3	cg25980637,cg05821634,cg18973939	Body,Body,Body	Island,Island,Island	FLJ37453,FLJ37453,FLJ37453	NR_024279,NR_024279,NR_024279	hyperM.iPSC
1	16148126	16148881	2	cg26334507,cg18147543	5'UTR,5'UTR	S_Shelf,_	ZBTB17,ZBTB17	NM_003443,NM_003443	hyperM.iPSC
1	16208039	16208908	2	cg14529268,cg04241342	_,_	_,_	_,_	_,_	hyperM.iPSC
1	16216343	16219021	9	cg11421972,cg21214613,cg09858176,cg13081498,cg13320181,cg24306962,cg03260781,cg00261668,cg06521827	Body,1stExon;5'UTR,TSS200,TSS200,TSS200,TSS1500,TSS1500,TSS1500,TSS1500	_,_	HSPB7,HSPB7;HSPB7,HSPB7,HSPB7,HSPB7,HSPB7,HSPB7,HSPB7,HSPB7	NM_014424,NM_014424;NM_014424,NM_014424,NM_014424,NM_014424,NM_014424,NM_014424,NM_014424,NM_014424	hyperM.iPSC
1	16220571	16221666	3	cg11528029,cg14742211,cg08231696	TSS1500;TSS1500,TSS200;TSS200,5'UTR;5'UTR	_,_	CLCNKA;CLCNKA,CLCNKA;CLCNKA,CLCNKA;CLCNKA	NM_004070;NM_001042704,NM_004070;NM_001042704,NM_001042704;NM_004070	hyperM.iPSC
1	16242785	16242804	2	cg09413450,cg12218389	TSS200,TSS200	_,_	CLCNKB,CLCNKB	NM_000085,NM_000085	hyperM.iPSC
1	16247355	16247433	2	cg06219995,cg15558527	TSS1500;Body,TSS1500;Body	_,_	CLCNKB;CLCNKB,CLCNKB;CLCNKB	NM_001165945;NM_000085,NM_001165945;NM_000085	hypoM.iPSC
1	16266378	16267155	2	cg18800143,cg18279134	Body,Body	_,_	FAM131C,FAM131C	NM_182623,NM_182623	hyperM.iPSC
1	16273252	16273469	2	cg25851313,cg22852013	TSS1500,TSS1500	S_Shore,S_Shore	FAM131C,FAM131C	NM_182623,NM_182623	hypoM.iPSC
1	16355354	16355405	2	cg15146752,cg09178261	TSS1500,TSS1500	Island,S_Shore	EPHA2,EPHA2	NM_004431,NM_004431	hypoM.iPSC
1	16411600	16411675	2	cg25220781,cg18669381	5'UTR;1stExon,5'UTR;1stExon	_,_	ARHGEF19;ARHGEF19,ARHGEF19;ARHGEF19	NM_153213;NM_153213,NM_153213;NM_153213	hypoM.iPSC
1	16640749	16640782	2	cg07121795,cg03920729	Body;Body;Body,Body;Body;Body	S_Shore,S_Shore	NECAP2;NECAP2;NECAP2,NECAP2;NECAP2;NECAP2	NM_018090;NM_001145277;NM_001145278,NM_018090;NM_001145277;NM_001145278	hyperM.iPSC
1	16891271	16893044	5	cg25196716,cg07311615,cg01260170,cg15629460,cg21460394	Body,Body,Body,Body,Body	Island,Island,Island,Island,Island	ESPNP,ESPNP,ESPNP,ESPNP,ESPNP	NR_026567,NR_026567,NR_026567,NR_026567,NR_026567	hyperM.iPSC
1	16963421	16964562	4	cg04195831,cg16584392,cg04362112,cg17140381	Body,Body,TSS1500,TSS1500	S_Shelf,S_Shelf,_	MST1P9,MST1P9,MST1P9,MST1P9	NR_002729,NR_002729,NR_002729,NR_002729	hyperM.iPSC
1	17137826	17138044	2	cg13678243,cg18862597	Body,Body	_,_	CROCC,CROCC	NM_014675,NM_014675	hypoM.iPSC
1	17165842	17166558	2	ch.1.587982R,cg06911110	Body,Body	S_Shore,S_Shore	CROCC,CROCC	NM_014675,NM_014675	hyperM.iPSC
1	17175446	17176339	2	cg21304454,cg00031063	Body;Body;Body;Body,Body;Body;Body;Body	N_Shelf,N_Shelf	MFAP2;MFAP2;MFAP2;MFAP2,MFAP2;MFAP2;MFAP2;MFAP2	NM_017459;NM_001135248;NM_002403;NM_001135247,NM_017459;NM_001135248;NM_002403;NM_001135247	hyperM.iPSC
1	17180265	17180793	5	cg03394122,cg08477744,cg12695612,cg17744878,cg19306948	TSS1500;5'UTR;5'UTR;TSS1500,TSS1500;5'UTR;1stExon;1stExon;5'UTR;TSS1500,TSS1500;TSS200;TSS200;TSS1500,TSS1500;TSS200;TSS200;TSS1500,TSS1500;TSS200;TSS200;TSS1500	S_Shore,S_Shore,S_Shore,S_Shore,S_Shore	MFAP2;MFAP2;MFAP2;MFAP2,MFAP2;MFAP2;MFAP2;MFAP2;MFAP2;MFAP2,MFAP2;MFAP2;MFAP2;MFAP2,MFAP2;MFAP2;MFAP2;MFAP2,MFAP2;MFAP2;MFAP2;MFAP2	NM_002403;NM_017459;NM_001135247;NM_001135248,NM_002403;NM_017459;NM_001135247;NM_017459;NM_001135247;NM_001135248,NM_002403;NM_001135247;NM_017459;NM_001135248,NM_002403;NM_001135247;NM_017459;NM_001135248,NM_002403;NM_001135247;NM_017459;NM_001135248	hyperM.iPSC
1	17254567	17254717	2	cg21534931,cg16696648	TSS1500,TSS1500	S_Shore,S_Shore	SDHB,SDHB	NM_003000,NM_003000	hyperM.iPSC
1	17319132	17319355	2	cg00569276,cg18879300	TSS1500,TSS1500	S_Shore,S_Shore	PADI2,PADI2	NM_007365,NM_007365	hypoM.iPSC
1	17348243	17348799	4	cg00924685,cg10432422,cg26516532,cg27576785	_,_	N_Shore,Island,Island,S_Shore	_,_	_,_	hyperM.iPSC
1	17411099	17411720	2	cg24724618,cg00954039	Body,Body	_,_	PADI1,PADI1	NM_013358,NM_013358	hyperM.iPSC
1	17447307	17448027	4	cg11534596,cg21966975,cg14664242,cg18768338	TSS1500,TSS200,TSS200,TSS200	_,_	PADI3,PADI3,PADI3,PADI3	NM_016233,NM_016233,NM_016233,NM_016233	hyperM.iPSC
1	17506268	17507303	4	cg23228178,cg16091981,cg21295838,cg18333690	TSS1500,TSS200,1stExon;5'UTR,1stExon;5'UTR	_,_	PADI4,PADI4,PADI4;PADI4,PADI4;PADI4	NM_012387,NM_012387,NM_012387;NM_012387,NM_012387;NM_012387	hyperM.iPSC
1	17535254	17535272	2	cg17785802,cg03547640	Body,Body	_,_	PADI4,PADI4	NM_012387,NM_012387	hyperM.iPSC
1	17570521	17571441	4	cg00298399,cg13879177,cg16017904,cg12643633	TSS1500,TSS1500,TSS1500,1stExon	_,_	PADI6,PADI6,PADI6,PADI6	NM_207421,NM_207421,NM_207421,NM_207421	hyperM.iPSC
1	17618927	17619427	4	cg01904812,cg09299086,cg13439596,cg08141956	Body;Body,Body;Body,Body;Body,Body;Body	Island,Island,Island,S_Shore	RCC2;RCC2,RCC2;RCC2,RCC2;RCC2,RCC2;RCC2	NM_018715;NM_001136204,NM_018715;NM_001136204,NM_018715;NM_001136204,NM_018715;NM_001136204	hyperM.iPSC
1	17639504	17639582	2	cg23913963,cg01713950	TSS1500,TSS1500	S_Shore,S_Shore	RCC2,RCC2	NM_018715,NM_018715	hypoM.iPSC
1	17719295	17719402	3	cg24874425,cg24539455,cg04872947	_,_	_,_	_,_	_,_	hyperM.iPSC
1	17932863	17933092	3	cg15131789,cg17902290,cg06956784	_,_	_,_	_,_	_,_	hyperM.iPSC
1	18024731	18025337	3	cg09821328,cg20796611,cg07121807	Body,Body,Body	N_Shore,Island,Island	ACTL8,ACTL8,ACTL8	NM_030812,NM_030812,NM_030812	hyperM.iPSC
1	18279373	18279399	2	cg21291759,cg01727764	_,_	_,_	_,_	_,_	hyperM.iPSC
1	18482322	18483109	2	cg26053526,cg13921220	Body,Body	_,_	IGSF21,IGSF21	NM_032880,NM_032880	hyperM.iPSC
1	18490217	18490378	3	cg17943995,cg09470268,cg00386725	Body,Body,Body	_,_	IGSF21,IGSF21,IGSF21	NM_032880,NM_032880,NM_032880	hyperM.iPSC
1	18564365	18564577	4	cg24810242,cg18015787,cg13426876,cg17720021	Body,Body,Body,Body	N_Shore,Island,Island,Island	IGSF21,IGSF21,IGSF21,IGSF21	NM_032880,NM_032880,NM_032880,NM_032880	hyperM.iPSC
1	18573190	18573212	2	cg23010629,cg10442251	Body,Body	N_Shelf,N_Shelf	IGSF21,IGSF21	NM_032880,NM_032880	hypoM.iPSC
1	18573478	18573486	2	cg26818821,cg01083050	Body,Body	N_Shelf,N_Shelf	IGSF21,IGSF21	NM_032880,NM_032880	hyperM.iPSC
1	18680689	18682351	4	cg14356550,cg24076588,cg03733578,cg21693033	1stExon,1stExon,1stExon,1stExon	N_Shore,N_Shore,Island,S_Shore	KLHDC7A,KLHDC7A,KLHDC7A,KLHDC7A	NM_152375,NM_152375,NM_152375,NM_152375	hyperM.iPSC
1	18883603	18883759	2	cg12407421,cg21215218	Body;Body;Body,Body;Body;Body	_,_	PAX7;PAX7;PAX7,PAX7;PAX7;PAX7	NM_013945;NM_002584;NM_001135254,NM_013945;NM_002584;NM_001135254	hyperM.iPSC
1	18921490	18921517	2	cg09791440,cg17468663	Body;Body;Body,Body;Body;Body	_,_	PAX7;PAX7;PAX7,PAX7;PAX7;PAX7	NM_013945;NM_002584;NM_001135254,NM_013945;NM_002584;NM_001135254	hyperM.iPSC
1	18924322	18924791	3	cg00247426,cg07706053,cg01965874	Body;Body;Body,Body;Body;Body,Body;Body;Body	_,_	PAX7;PAX7;PAX7,PAX7;PAX7;PAX7,PAX7;PAX7;PAX7	NM_013945;NM_002584;NM_001135254,NM_013945;NM_002584;NM_001135254,NM_013945;NM_002584;NM_001135254	hyperM.iPSC
1	19121963	19122866	2	cg18177731,cg09012001	Body,Body	_,_	IFFO2,IFFO2	NM_001136265,NM_001136265	hyperM.iPSC
1	19126618	19127318	2	cg04276058,cg10231067	Body,Body	_,_	IFFO2,IFFO2	NM_001136265,NM_001136265	hyperM.iPSC
1	19265660	19266457	2	ch.1.653511R,cg14181528	_,_	_,_	_,_	_,_	hyperM.iPSC
1	19473041	19473058	2	cg15948567,cg20677058	1stExon;1stExon,1stExon;1stExon	Island,Island	AKR7L;AKR7L,AKR7L;AKR7L	NM_201252;NM_001145289,NM_201252;NM_001145289	hyperM.iPSC
1	19538033	19538344	3	cg15676500,cg10970798,cg25141181	3'UTR,3'UTR,3'UTR	S_Shore,S_Shore,S_Shore	CAPZB,CAPZB,CAPZB	NM_004930,NM_004930,NM_004930	hypoM.iPSC
1	19637273	19637408	2	cg11962640,cg23111655	Body,Body	_,_	CAPZB,CAPZB	NM_004930,NM_004930	hyperM.iPSC
1	19864611	19865572	3	cg10741760,cg00365524,cg06033660	5'UTR;1stExon,1stExon,Body	Island,Island,S_Shore	HTR6;HTR6,HTR6,HTR6	NM_000871;NM_000871,NM_000871,NM_000871	hyperM.iPSC
1	19998433	19999366	2	cg09138671,cg26886978	5'UTR,TSS1500	N_Shore,Island	TMCO4,TMCO4	NM_181719,NM_181719	hyperM.iPSC
1	20014365	20015149	2	cg23214395,cg17135423	TSS200,TSS1500	_,_	RNF186,RNF186	NM_019062,NM_019062	hyperM.iPSC
1	20077622	20077646	2	cg12394941,cg15602420	_,_	N_Shelf,N_Shelf	_,_	_,_	hyperM.iPSC
1	20122773	20123600	2	cg01441698,cg10812684	TSS200,TSS1500	_,_	PLA2G2E,PLA2G2E	NM_014589,NM_014589	hyperM.iPSC
1	20177931	20180050	5	cg02860199,cg08235413,cg22220722,cg11037787,cg25755892	5'UTR;5'UTR;5'UTR;5'UTR,5'UTR;5'UTR;5'UTR;5'UTR,5'UTR;5'UTR;TSS1500;5'UTR,TSS1500;TSS200;TSS200;TSS200,TSS1500;TSS1500;TSS1500;TSS1500	_,_	PLA2G2A;PLA2G2A;PLA2G2A;PLA2G2A,PLA2G2A;PLA2G2A;PLA2G2A;PLA2G2A,PLA2G2A;PLA2G2A;PLA2G2A;PLA2G2A,PLA2G2A;PLA2G2A;PLA2G2A;PLA2G2A,PLA2G2A;PLA2G2A;PLA2G2A;PLA2G2A	NM_000300;NM_001161729;NM_001161727;NM_001161728,NM_000300;NM_001161729;NM_001161727;NM_001161728,NM_000300;NM_001161727;NM_001161729;NM_001161728,NM_001161729;NM_001161727;NM_001161728;NM_000300,NM_001161728;NM_000300;NM_001161729;NM_001161727	hyperM.iPSC
1	20269277	20269337	2	cg06222062,cg25974901	TSS200,1stExon;5'UTR	_,_	PLA2G5,PLA2G5;PLA2G5	NM_000929,NM_000929;NM_000929	hyperM.iPSC
1	20318249	20319244	2	cg14321743,cg07142319	Body,TSS1500	_,_	PLA2G2D,PLA2G2D	NM_012400,NM_012400	hyperM.iPSC
1	20374145	20374821	2	cg04605617,cg01063509	1stExon,TSS1500	_,_	PLA2G2C,PLA2G2C	NM_001105572,NM_001105572	hyperM.iPSC
1	20489027	20489538	2	cg16965374,cg13463492	TSS1500,TSS1500	_,_	VWA5B1,VWA5B1	NM_001039500,NM_001039500	hyperM.iPSC
1	20564541	20564809	2	cg02873528,cg04722511	_,_	N_Shore,N_Shore	_,_	_,_	hyperM.iPSC
1	20569915	20570610	2	cg26315261,cg12624197	_,_	S_Shelf,_	_,_	_,_	hyperM.iPSC
1	20598585	20599261	2	cg08722591,cg04415114	_,_	_,_	_,_	_,_	hyperM.iPSC
1	20605067	20605141	2	cg05773309,cg26309074	_,_	_,_	_,_	_,_	hyperM.iPSC
1	20628121	20628631	2	cg10586107,cg20270882	_,_	_,_	_,_	_,_	hyperM.iPSC
1	20786615	20786909	2	cg24502330,cg03693486	TSS1500,TSS1500	_,_	CDA,CDA	NM_001785,NM_001785	hyperM.iPSC
1	20788179	20788766	2	cg00784581,cg20619374	1stExon;5'UTR,Body	_,_	CDA;CDA,CDA	NM_001785;NM_001785,NM_001785	hyperM.iPSC
1	20861177	20861350	3	cg08911391,cg24876897,cg12743621	TSS1500,TSS1500,TSS1500	S_Shore,S_Shore,S_Shore	DDOST,DDOST,DDOST	NM_005216,NM_005216,NM_005216	hyperM.iPSC
1	21479028	21479204	2	cg01780990,cg21005416	TSS1500;Body;Body;Body,TSS1500;Body;Body;Body	_,_	ECE1;ECE1;ECE1;ECE1,ECE1;ECE1;ECE1;ECE1	NM_001113347;NM_001397;NM_001113349;NM_001113348,NM_001113347;NM_001397;NM_001113349;NM_001113348	hyperM.iPSC
1	21707804	21708023	2	cg06035250,cg23352747	TSS1500,TSS1500	N_Shore,N_Shore	ALPL,ALPL	NM_000478,NM_000478	hyperM.iPSC
1	21737375	21737483	2	cg22719004,cg14781605	5'UTR,5'UTR	_,_	ALPL,ALPL	NM_000478,NM_000478	hyperM.iPSC
1	21773574	21773753	2	cg24722348,cg07142010	Body;Body,Body;Body	_,_	ALPL;ALPL,ALPL;ALPL	NM_001127501;NM_000478,NM_001127501;NM_000478	hyperM.iPSC
1	21786045	21786144	2	cg10112270,cg08922729	_,_	_,_	_,_	_,_	hyperM.iPSC
1	21838897	21839087	3	cg07499899,cg03727673,cg06993467	Body;5'UTR;5'UTR,Body;5'UTR;5'UTR,Body;5'UTR;5'UTR	_,_	RAP1GAP;RAP1GAP;RAP1GAP,RAP1GAP;RAP1GAP;RAP1GAP,RAP1GAP;RAP1GAP;RAP1GAP	NM_001145658;NM_002885;NM_001145657,NM_001145658;NM_002885;NM_001145657,NM_001145658;NM_002885;NM_001145657	hyperM.iPSC
1	21858688	21858873	2	cg20487231,cg05120085	5'UTR;5'UTR,5'UTR;5'UTR	Island,S_Shore	RAP1GAP;RAP1GAP,RAP1GAP;RAP1GAP	NM_002885;NM_001145657,NM_002885;NM_001145657	hyperM.iPSC
1	21865988	21866142	2	cg12093060,cg02760280	5'UTR;5'UTR,5'UTR;5'UTR	N_Shore,N_Shore	RAP1GAP;RAP1GAP,RAP1GAP;RAP1GAP	NM_002885;NM_001145657,NM_002885;NM_001145657	hyperM.iPSC
1	22013977	22013987	2	cg17065852,cg22025064	Body,Body	Island,Island	LDLRAD2,LDLRAD2	NM_001013693,NM_001013693	hyperM.iPSC
1	22100740	22101169	2	cg00359395,cg24332002	Body,Body	_,_	HSPG2,HSPG2	NM_005529,NM_005529	hyperM.iPSC
1	22223843	22224135	6	cg17240885,cg03114585,cg01720742,cg21789280,cg01573472,cg21388327	TSS1500;TSS1500,TSS1500;TSS1500,TSS1500;TSS1500,TSS1500;TSS1500,TSS1500;TSS200,TSS1500;TSS200	N_Shore,N_Shore,N_Shore,N_Shore,N_Shore,N_Shore	HSPC157;HSPC157,HSPC157;HSPC157,HSPC157;HSPC157,HSPC157;HSPC157,HSPC157;HSPC157,HSPC157;HSPC157	NR_023918;NR_023919,NR_023918;NR_023919,NR_023918;NR_023919,NR_023918;NR_023919,NR_023919;NR_023918,NR_023919;NR_023918	hyperM.iPSC
1	22541226	22541245	2	cg13827179,cg06794253	_,_	Island,Island	_,_	_,_	hyperM.iPSC
1	22775124	22775993	2	cg01628425,cg12596914	Body;Body,Body;Body	N_Shore,Island	EPHA8;EPHA8,EPHA8;EPHA8	NM_001006943;NM_020526,NM_001006943;NM_020526	hyperM.iPSC
1	22798034	22798076	2	cg09940915,cg22493620	Body,Body	N_Shore,N_Shore	EPHA8,EPHA8	NM_020526,NM_020526	hyperM.iPSC
1	22834619	22835573	4	cg13168221,cg08710757,cg07109332,cg10916651	TSS1500,TSS1500,TSS1500,TSS200	_,_	C1QA,C1QA,C1QA,C1QA	NM_015991,NM_015991,NM_015991,NM_015991	hyperM.iPSC
1	22841927	22842719	2	cg11393848,cg17104151	TSS1500;TSS1500,1stExon;5'UTR;5'UTR;1stExon	_,N_Shelf	C1QC;C1QC,C1QC;C1QC;C1QC;C1QC	NM_001114101;NM_172369,NM_001114101;NM_172369;NM_001114101;NM_172369	hyperM.iPSC
1	22851143	22852133	4	cg07012832,cg10088685,cg14041976,cg24931346	TSS1500,TSS1500,TSS1500,TSS200	_,_	C1QB,C1QB,C1QB,C1QB	NM_000491,NM_000491,NM_000491,NM_000491	hyperM.iPSC
1	23368891	23369235	2	cg26530485,cg01435109	TSS1500;TSS1500,TSS1500;TSS1500	_,_	LUZP1;LUZP1,LUZP1;LUZP1	NM_033631;NM_001142546,NM_033631;NM_001142546	hyperM.iPSC
1	23393894	23394402	4	cg11953164,cg20678835,cg08872493,cg04974804	TSS200,TSS200,TSS200,TSS1500	_,_	HTR1D,HTR1D,HTR1D,HTR1D	NM_000864,NM_000864,NM_000864,NM_000864	hyperM.iPSC
1	23541278	23541379	2	cg00907427,cg08718097	5'UTR;5'UTR;5'UTR;5'UTR,5'UTR;5'UTR;5'UTR;5'UTR	N_Shore,N_Shore	HNRNPR;HNRNPR;HNRNPR;HNRNPR,HNRNPR;HNRNPR;HNRNPR;HNRNPR	NM_005826;NM_001102397;NM_001102399;NM_001102398,NM_005826;NM_001102397;NM_001102399;NM_001102398	hyperM.iPSC
1	23568608	23569000	5	cg20959676,cg05139070,cg24038158,cg16727538,cg15598244	Body;5'UTR;1stExon;1stExon;TSS1500,3'UTR;Body;5'UTR;1stExon;1stExon;TSS1500,3'UTR;Body;5'UTR;1stExon;1stExon;TSS1500,3'UTR;Body;5'UTR;1stExon;1stExon;TSS1500,3'UTR;Body;TSS200;1stExon	Island,S_Shore,S_Shore,S_Shore,S_Shore	C1orf213;ZNF436;C1orf213;ZNF436;ZNF436,C1orf213;C1orf213;ZNF436;C1orf213;ZNF436;ZNF436,C1orf213;C1orf213;ZNF436;C1orf213;ZNF436;ZNF436,C1orf213;C1orf213;ZNF436;C1orf213;ZNF436;ZNF436,C1orf213;C1orf213;ZNF436;C1orf213	NM_001008896;NM_001077195;NM_138479;NM_001077195;NM_030634,NM_138479;NM_001008896;NM_001077195;NM_138479;NM_001077195;NM_030634,NM_138479;NM_001008896;NM_001077195;NM_138479;NM_001077195;NM_030634,NM_138479;NM_001008896;NM_001077195;NM_138479;NM_001077195;NM_030634,NM_138479;NM_001008896;NM_001077195;NM_138479	hyperM.iPSC
1	23569884	23570093	2	cg16696234,cg22502492	3'UTR;Body;1stExon;TSS1500,3'UTR;Body;1stExon;TSS1500	S_Shore,S_Shore	C1orf213;C1orf213;C1orf213;ZNF436,C1orf213;C1orf213;C1orf213;ZNF436	NM_138479;NM_001008896;NM_138479;NM_001077195,NM_138479;NM_001008896;NM_138479;NM_001077195	hypoM.iPSC
1	23636037	23636369	2	cg02351745,cg21105827	Body;Body,Body;Body	Island,Island	ASAP3;ASAP3,ASAP3;ASAP3	NM_017707;NM_001143778,NM_017707;NM_001143778	hypoM.iPSC
1	23727434	23727736	3	cg11526198,cg00231049,cg05590755	Body,Body,Body	N_Shelf,N_Shore,N_Shore	E2F2,E2F2,E2F2	NM_004091,NM_004091,NM_004091	hyperM.iPSC
1	23890530	23890674	3	cg24406162,cg11252261,cg04608326	TSS1500,TSS1500,TSS1500	N_Shore,N_Shore,N_Shore	RPL11,RPL11,RPL11	NM_000975,NM_000975,NM_000975	hyperM.iPSC
1	23943840	23944144	2	cg12717729,cg08279092	Body,Body	S_Shore,S_Shore	TCEB3,TCEB3	NM_003198,NM_003198	hyperM.iPSC
1	24067618	24068246	6	cg10051214,cg24792360,cg21528040,cg22077361,cg22614927,cg04160030	TSS200,TSS1500,TSS1500,TSS1500,TSS1500,TSS1500	S_Shore,S_Shore,S_Shore,S_Shore,S_Shore,S_Shore	FUCA1,FUCA1,FUCA1,FUCA1,FUCA1,FUCA1	NM_000147,NM_000147,NM_000147,NM_000147,NM_000147,NM_000147	hyperM.iPSC
1	24112407	24112656	3	cg16679650,cg16410115,cg26151675	TSS200,TSS200,TSS1500	_,_	CNR2,CNR2,CNR2	NM_001841,NM_001841,NM_001841	hyperM.iPSC
1	24179878	24180016	2	cg04021497,cg03944843	TSS1500;TSS1500,TSS1500;TSS1500	S_Shore,S_Shore	SFRS13A;SFRS13A,SFRS13A;SFRS13A	NM_054016;NM_006625,NM_054016;NM_006625	hyperM.iPSC
1	24311290	24311662	2	cg06548416,cg01350686	TSS200,TSS1500	_,_	MYOM3,MYOM3	NM_152372,NM_152372	hyperM.iPSC
1	24342151	24342378	3	cg09152089,cg21293216,cg25946374	1stExon,TSS200,TSS200	_,_	IL22RA1,IL22RA1,IL22RA1	NM_021258,NM_021258,NM_021258	hyperM.iPSC
1	24401058	24401420	2	cg17172066,cg15571353	Body,Body	_,_	LOC284632,LOC284632	NR_027087,NR_027087	hyperM.iPSC
1	24518633	24518792	2	cg14167629,cg01119512	1stExon,Body	N_Shelf,N_Shore	GRHL3,GRHL3	NM_198173,NM_198173	hypoM.iPSC
1	24615466	24616079	3	cg20279402,cg18323236,cg15697160	5'UTR,5'UTR,5'UTR	Island,Island,S_Shore	NIPAL3,NIPAL3,NIPAL3	NM_020448,NM_020448,NM_020448	hyperM.iPSC
1	24943847	24943942	3	cg10522447,cg26838747,cg15451272	TSS1500,TSS1500,TSS1500	N_Shore,N_Shore,Island	CLIC4,CLIC4,CLIC4	NM_013943,NM_013943,NM_013943	hyperM.iPSC
1	25113452	25113525	3	cg13566436,cg20674490,cg05162523	Body;Body,Body;Body,Body;Body	_,_	RUNX3;RUNX3,RUNX3;RUNX3,RUNX3;RUNX3	NM_001031680;NM_004350,NM_001031680;NM_004350,NM_001031680;NM_004350	hyperM.iPSC
1	25119441	25119509	2	cg15498134,cg08544331	Body;Body,Body;Body	_,_	RUNX3;RUNX3,RUNX3;RUNX3	NM_001031680;NM_004350,NM_001031680;NM_004350	hyperM.iPSC
1	25126675	25126736	3	cg05656688,cg03769939,cg11336061	Body;Body,Body;Body,Body;Body	N_Shore,N_Shore,N_Shore	RUNX3;RUNX3,RUNX3;RUNX3,RUNX3;RUNX3	NM_001031680;NM_004350,NM_001031680;NM_004350,NM_001031680;NM_004350	hypoM.iPSC
1	25130092	25131693	22	cg07996594,cg04221877,cg15014975,cg24019564,cg10993442,cg24842859,cg20695936,cg13106389,cg18087266,cg25882256,cg04250451,cg10013501,cg25470148,cg24463471,cg21406271,cg26256263,cg13305657,cg24006721,cg00929376,cg04907595,cg03171924,cg26864395	TSS1500;Body,TSS1500;Body,TSS1500;Body,TSS1500;Body,TSS1500;Body,TSS1500;Body,TSS1500;Body,TSS1500;Body,TSS1500;Body,TSS1500;Body,TSS1500;Body,TSS1500;Body,TSS1500;Body,TSS1500;Body,TSS1500;Body,TSS1500;Body,TSS1500;Body,TSS1500;Body,TSS1500;Body,TSS1500;Body,Body,Body	Island,Island,Island,Island,Island,Island,Island,Island,Island,Island,Island,Island,Island,Island,Island,Island,Island,Island,Island,Island,Island,S_Shore	RUNX3;RUNX3,RUNX3;RUNX3,RUNX3;RUNX3,RUNX3;RUNX3,RUNX3;RUNX3,RUNX3;RUNX3,RUNX3;RUNX3,RUNX3;RUNX3,RUNX3;RUNX3,RUNX3;RUNX3,RUNX3;RUNX3,RUNX3;RUNX3,RUNX3;RUNX3,RUNX3;RUNX3,RUNX3;RUNX3,RUNX3;RUNX3,RUNX3;RUNX3,RUNX3;RUNX3,RUNX3;RUNX3,RUNX3;RUNX3,RUNX3,RUNX3	NM_004350;NM_001031680,NM_004350;NM_001031680,NM_004350;NM_001031680,NM_004350;NM_001031680,NM_004350;NM_001031680,NM_004350;NM_001031680,NM_004350;NM_001031680,NM_004350;NM_001031680,NM_004350;NM_001031680,NM_004350;NM_001031680,NM_004350;NM_001031680,NM_004350;NM_001031680,NM_004350;NM_001031680,NM_004350;NM_001031680,NM_004350;NM_001031680,NM_004350;NM_001031680,NM_004350;NM_001031680,NM_00435…	hypoM.iPSC
1	25163534	25164578	4	cg14182690,cg13461622,cg04554131,cg14425908	Body,1stExon;5'UTR,TSS200,TSS1500	_,_	RUNX3,RUNX3;RUNX3,RUNX3,RUNX3	NM_001031680,NM_001031680;NM_001031680,NM_001031680,NM_001031680	hyperM.iPSC
1	25221593	25222268	2	cg06527318,cg27537125	_,_	_,_	_,_	_,_	hyperM.iPSC
1	25817299	25817629	3	cg16836311,cg16585234,cg09027133	1stExon,1stExon,Body	Island,S_Shore,S_Shore	MAN1C1,MAN1C1,MAN1C1	NM_020379,NM_020379,NM_020379	hypoM.iPSC
1	25970578	25970801	2	cg05193538,cg04980428	Body,Body	Island,S_Shore	MAN1C1,MAN1C1	NM_020379,NM_020379	hyperM.iPSC
1	26017994	26018024	2	cg14149304,cg08304059	TSS1500;TSS1500;TSS1500,TSS1500;TSS1500;TSS1500	N_Shore,N_Shore	FAM54B;FAM54B;FAM54B,FAM54B;FAM54B;FAM54B	NM_001099625;NM_001099627;NM_019557,NM_001099625;NM_001099627;NM_019557	hyperM.iPSC
1	26019961	26020404	2	cg20787693,cg12587382	1stExon;5'UTR;5'UTR;5'UTR;Body;5'UTR,5'UTR;5'UTR;5'UTR;Body;5'UTR	S_Shore,S_Shore	FAM54B;FAM54B;FAM54B;FAM54B;LOC646471;FAM54B,FAM54B;FAM54B;FAM54B;LOC646471;FAM54B	NM_001099626;NM_001099625;NM_001099627;NM_001099626;NR_024498;NM_019557,NM_001099625;NM_001099627;NM_001099626;NR_024498;NM_019557	hyperM.iPSC
1	26070759	26071308	3	cg11143175,cg23799313,cg12805491	TSS1500,TSS1500,TSS1500	N_Shelf,N_Shelf,N_Shelf	PAQR7,PAQR7,PAQR7	NM_178422,NM_178422,NM_178422	hyperM.iPSC
1	26106022	26106093	2	cg09796501,cg26314868	TSS1500;TSS1500;TSS1500;TSS200,TSS1500;TSS1500;TSS1500;TSS200	Island,Island	STMN1;STMN1;STMN1;STMN1,STMN1;STMN1;STMN1;STMN1	NM_005563;NM_203401;NM_001145454;NM_203399,NM_005563;NM_203401;NM_001145454;NM_203399	hyperM.iPSC
1	26197708	26197936	2	cg20383084,cg06521299	TSS1500,TSS1500	S_Shore,S_Shore	PAFAH2,PAFAH2	NM_000437,NM_000437	hyperM.iPSC
1	26219675	26220128	3	cg21950720,cg13783323,cg07821739	TSS1500,TSS1500,TSS1500	_,_	EXTL1,EXTL1,EXTL1	NM_004455,NM_004455,NM_004455	hyperM.iPSC
1	26245719	26245994	3	cg10501085,cg18303360,cg03987192	TSS1500;TSS1500,TSS1500;TSS1500,TSS1500;TSS1500	Island,Island,S_Shore	SLC30A2;SLC30A2,SLC30A2;SLC30A2,SLC30A2;SLC30A2	NM_001004434;NM_032513,NM_001004434;NM_032513,NM_001004434;NM_032513	hyperM.iPSC
1	26266596	26267022	6	cg04489573,cg16051685,cg02839330,cg24685778,cg01973987,cg13998293	1stExon;5'UTR,1stExon;5'UTR,TSS200,TSS200,TSS200,TSS1500	_,_	TRIM63;TRIM63,TRIM63;TRIM63,TRIM63,TRIM63,TRIM63,TRIM63	NM_032588;NM_032588,NM_032588;NM_032588,NM_032588,NM_032588,NM_032588,NM_032588	hyperM.iPSC
1	26367258	26368823	5	cg20152413,cg15651345,cg03722802,cg08729059,cg21851967	_,TSS1500,TSS1500,TSS1500,TSS200	N_Shore,N_Shore,N_Shore,N_Shore,Island	_,ZNF593,ZNF593,ZNF593,ZNF593	_,NM_015871,NM_015871,NM_015871,NM_015871	hyperM.iPSC
1	26376363	26376578	8	cg19740054,cg17330765,cg00300879,cg09890400,cg10096100,cg26412358,cg23602478,cg00147160	TSS1500;TSS1500,TSS1500;TSS1500,TSS200;TSS200,TSS200;TSS200,TSS200;TSS200,TSS200;TSS200,TSS200;TSS200,Body;5'UTR;1stExon	_,_	CNKSR1;CNKSR1,CNKSR1;CNKSR1,CNKSR1;CNKSR1,CNKSR1;CNKSR1,CNKSR1;CNKSR1,CNKSR1;CNKSR1,CNKSR1;CNKSR1,CNKSR1;CNKSR1;CNKSR1	NM_006314;NR_023345,NM_006314;NR_023345,NR_023345;NM_006314,NR_023345;NM_006314,NR_023345;NM_006314,NR_023345;NM_006314,NR_023345;NM_006314,NR_023345;NM_006314;NM_006314	hypoM.iPSC
1	26424105	26424297	2	cg10468070,cg19516105	_,_	Island,Island	_,_	_,_	hyperM.iPSC
1	26477728	26478697	3	cg12445424,cg01294686,cg14788334	3'UTR;TSS1500,TSS200,TSS200	N_Shore,N_Shore,N_Shore	CCDC21;SH3BGRL3,SH3BGRL3,SH3BGRL3	NM_022778;NM_031286,NM_031286,NM_031286	hyperM.iPSC
1	26483898	26484040	2	cg00768487,cg24348240	Body;Body;Body,Body;Body;Body	_,_	UBXN11;UBXN11;UBXN11,UBXN11;UBXN11;UBXN11	NM_001077262;NM_145345;NM_183008,NM_001077262;NM_145345;NM_183008	hyperM.iPSC
1	26505126	26506219	3	cg04978408,cg03724759,cg00852783	5'UTR;5'UTR;5'UTR,5'UTR;TSS1500;TSS1500,5'UTR;TSS1500;TSS1500	N_Shore,S_Shore,S_Shore	UBXN11;UBXN11;UBXN11,UBXN11;UBXN11;UBXN11,UBXN11;UBXN11;UBXN11	NM_001077262;NM_145345;NM_183008,NM_145345;NM_183008;NM_001077262,NM_145345;NM_183008;NM_001077262	hyperM.iPSC
1	26516821	26517748	3	cg08572767,cg16068833,cg19677267	TSS200;5'UTR,5'UTR;1stExon,Body;TSS1500	_,_	CD52;UBXN11,UBXN11;CD52,CD52;UBXN11	NM_001803;NM_145345,NM_145345;NM_001803,NM_001803;NM_145345	hyperM.iPSC
1	26729871	26730361	2	cg13092108,cg24585377	Body,Body	S_Shore,S_Shore	RPS6KA1,RPS6KA1	NM_002953,NM_002953	hypoM.iPSC
1	26985806	26986340	7	cg24313303,cg13391849,cg15110463,cg14037036,cg21863499,cg07782886,cg01791104	TSS1500,TSS1500,TSS1500,TSS1500,TSS1500,TSS1500,TSS1500	N_Shore,N_Shore,N_Shore,N_Shore,N_Shore,N_Shore,N_Shore	PIGV,PIGV,PIGV,PIGV,PIGV,PIGV,PIGV	NM_017837,NM_017837,NM_017837,NM_017837,NM_017837,NM_017837,NM_017837	hyperM.iPSC
1	26988151	26988214	2	cg18289893,cg03129904	5'UTR,5'UTR	S_Shore,S_Shore	PIGV,PIGV	NM_017837,NM_017837	hyperM.iPSC
1	27025281	27025492	2	cg04427651,cg02657830	TSS1500,TSS1500	N_Shore,N_Shore	ZDHHC18,ZDHHC18	NM_032283,NM_032283	hyperM.iPSC
1	27062027	27062266	2	cg06720467,cg13466284	TSS200,1stExon;5'UTR	N_Shore,N_Shore	SFN,SFN;SFN	NM_006142,NM_006142;NM_006142	hypoM.iPSC
1	27063226	27063654	2	cg14825555,cg16558172	1stExon;3'UTR,_	N_Shore,Island	SFN;SFN,_	NM_006142;NM_006142,_	hyperM.iPSC
1	27113101	27113256	2	cg16762386,cg16177693	1stExon;5'UTR,TSS200	_,_	NR0B2;NR0B2,NR0B2	NM_021969;NM_021969,NM_021969	hyperM.iPSC
1	27114440	27114484	2	cg07914457,cg16985652	TSS1500,TSS1500	_,_	NR0B2,NR0B2	NM_021969,NM_021969	hyperM.iPSC
1	27120362	27120416	2	cg25614889,cg26005232	TSS1500,TSS1500	N_Shore,N_Shore	NUDC,NUDC	NM_006600,NM_006600	hyperM.iPSC
1	27210510	27211565	3	cg14665203,cg20486246,cg16352283	Body,Body,1stExon	N_Shore,N_Shore,Island	FAM46B,FAM46B,FAM46B	NM_052943,NM_052943,NM_052943	hypoM.iPSC
1	27351899	27354421	4	cg24738346,cg09725874,cg03769927,cg11743054	Body,Body,1stExon;5'UTR,TSS1500	N_Shelf,N_Shore,N_Shore,S_Shore	SLC9A1,SLC9A1,SLC9A1;SLC9A1,SLC9A1	NM_003047,NM_003047,NM_003047;NM_003047,NM_003047	hyperM.iPSC
1	27520193	27521041	3	cg14162906,cg19160754,cg12399453	TSS1500,TSS1500,TSS200	N_Shore,N_Shore,Island	TMEM222,TMEM222,TMEM222	NM_032125,NM_032125,NM_032125	hyperM.iPSC
1	27549827	27550725	2	cg01963906,cg00539261	Body,Body	Island,S_Shore	SYTL1,SYTL1	NM_032872,NM_032872	hypoM.iPSC
1	27559355	27560272	4	cg06507987,cg01730970,cg06035600,cg25133130	Body,Body,Body,Body	N_Shore,Island,Island,Island	MAP3K6,MAP3K6,MAP3K6,MAP3K6	NM_004672,NM_004672,NM_004672,NM_004672	hypoM.iPSC
1	27582271	27582617	2	cg19719807,cg15166089	1stExon,TSS1500	Island,S_Shore	CD164L2,CD164L2	NM_207397,NM_207397	hypoM.iPSC
1	27601640	27602772	5	cg27513684,cg00988346,cg08168580,cg14783891,cg13917151	_,_	_,_	_,_	_,_	hyperM.iPSC
1	27687312	27688284	2	cg15936990,cg26601722	5'UTR,5'UTR	N_Shore,N_Shore	WASF2,WASF2	NM_006990,NM_006990	hyperM.iPSC
1	27689833	27689898	2	cg26894259,cg08915615	TSS1500,TSS1500	S_Shore,S_Shore	WASF2,WASF2	NM_006990,NM_006990	hyperM.iPSC
1	27766473	27766512	2	cg00594099,cg17110920	5'UTR,5'UTR	N_Shore,N_Shore	AHDC1,AHDC1	NM_001029882,NM_001029882	hyperM.iPSC
1	27803871	27803897	2	cg11697038,cg17164905	TSS1500,TSS1500	S_Shore,S_Shore	AHDC1,AHDC1	NM_001029882,NM_001029882	hypoM.iPSC
1	27814453	27814773	3	cg22124648,cg13184177,cg23167456	Body;Body;Body,Body;Body;Body,Body;Body;Body	Island,Island,Island	FGR;FGR;FGR,FGR;FGR;FGR,FGR;FGR;FGR	NM_001042729;NM_001042747;NM_005248,NM_001042729;NM_001042747;NM_005248,NM_001042729;NM_001042747;NM_005248	hypoM.iPSC
1	27833921	27834624	3	cg05783223,cg09845000,cg00065048	5'UTR,TSS1500,TSS1500	N_Shore,S_Shore,S_Shore	FGR,FGR,FGR	NM_005248,NM_005248,NM_005248	hyperM.iPSC
1	28029586	28029598	2	cg08857906,cg15707455	TSS1500;TSS1500;TSS1500,TSS1500;TSS1500;TSS1500	N_Shore,N_Shore	PPP1R8;PPP1R8;PPP1R8,PPP1R8;PPP1R8;PPP1R8	NM_014110;NM_002713;NM_138558,NM_014110;NM_002713;NM_138558	hyperM.iPSC
1	28156299	28156687	2	cg03599257,cg03700669	Body,Body	N_Shore,N_Shore	SMPDL3B,SMPDL3B	NM_014474,NM_014474	hyperM.iPSC
1	28375955	28376307	2	cg14288403,cg18468844	1stExon;TSS200;5'UTR;5'UTR;5'UTR,TSS1500;TSS1500;5'UTR;5'UTR	_,_	PTAFR;PTAFR;PTAFR;PTAFR;PTAFR,PTAFR;PTAFR;PTAFR;PTAFR	NM_000952;NM_001164723;NM_000952;NM_001164721;NM_001164722,NM_001164723;NM_000952;NM_001164721;NM_001164722	hyperM.iPSC
1	28457982	28458328	3	cg02737621,cg06754224,cg08729985	TSS1500,TSS1500,TSS1500	N_Shore,N_Shore,N_Shore	SESN2,SESN2,SESN2	NM_031459,NM_031459,NM_031459	hyperM.iPSC
1	28637110	28637618	2	cg08123074,cg00956142	TSS200;Body,Body;Body	_,_	PHACTR4;PHACTR4,PHACTR4;PHACTR4	NM_023923;NM_001048183,NM_023923;NM_001048183	hyperM.iPSC
1	28716323	28716984	4	cg25596287,cg19409133,cg02732067,cg01551176	Body;TSS1500;Body;TSS1500;5'UTR;TSS1500,Body;TSS1500;Body;TSS1500;5'UTR;TSS1500,Body;TSS1500;Body;TSS1500;5'UTR;TSS1500,Body;TSS1500;Body;TSS1500;5'UTR;TSS1500	N_Shore,N_Shore,N_Shore,N_Shore	SNHG3-RCC1;RCC1;SNHG3-RCC1;RCC1;SNHG3-RCC1;RCC1,SNHG3-RCC1;RCC1;SNHG3-RCC1;RCC1;SNHG3-RCC1;RCC1,SNHG3-RCC1;RCC1;SNHG3-RCC1;RCC1;SNHG3-RCC1;RCC1,SNHG3-RCC1;RCC1;SNHG3-RCC1;RCC1;SNHG3-RCC1;RCC1	NR_030725;NM_001269;NR_030726;NM_001048195;NM_001048199;NM_001048194,NR_030725;NM_001269;NR_030726;NM_001048195;NM_001048199;NM_001048194,NR_030725;NM_001269;NR_030726;NM_001048195;NM_001048199;NM_001048194,NR_030725;NM_001269;NR_030726;NM_001048195;NM_001048199;NM_001048194	hyperM.iPSC
1	28778160	28778969	3	cg12640482,cg19712659,cg15601452	Body;TSS1500,Body;TSS1500;Body,Body;TSS1500;Body	N_Shelf,N_Shore,N_Shore	SNHG12;SNORD99,SNHG12;SNORD99;SNORA61,SNHG12;SNORD99;SNORA61	NR_024127;NR_003077,NR_024127;NR_003077;NR_002987,NR_024127;NR_003077;NR_002987	hyperM.iPSC
1	28780065	28780140	2	cg00261162,cg04206337	Body;Body;TSS1500;TSS1500,Body;Body;TSS1500;TSS1500	N_Shore,N_Shore	SNORA16A;SNHG12;SNORA44;SNORA61,SNORA16A;SNHG12;SNORA44;SNORA61	NR_003035;NR_024127;NR_002976;NR_002987,NR_003035;NR_024127;NR_002976;NR_002987	hyperM.iPSC
1	28800912	28801140	3	cg02579668,ch.1.28801127F,ch.1.28801140F	_,_	_,_	_,_	_,_	hyperM.iPSC
1	28842574	28843590	3	cg07898057,cg03747028,cg03287108	TSS1500;TSS1500,TSS1500;TSS1500,TSS1500;TSS1500	S_Shore,S_Shore,S_Shore	TAF12;TAF12,TAF12;TAF12,TAF12;TAF12	NM_001135218;NM_005644,NM_001135218;NM_005644,NM_001135218;NM_005644	hyperM.iPSC
1	28867437	28867574	2	cg24675730,cg11336539	TSS1500;TSS1500,TSS1500;TSS1500	_,_	GMEB1;GMEB1,GMEB1;GMEB1	NM_006582;NM_024482,NM_006582;NM_024482	hyperM.iPSC
1	28935018	28935446	3	cg03375056,cg03731740,cg25273602	TSS1500,TSS1500,TSS1500	N_Shore,N_Shore,N_Shore	YTHDF2,YTHDF2,YTHDF2	NM_016258,NM_016258,NM_016258	hypoM.iPSC
1	28974196	28974740	6	cg20280170,cg22861340,cg00151709,cg06221449,cg10387543,cg10782019	_,_	N_Shore,Island,Island,Island,Island,S_Shore	_,_	_,_	hyperM.iPSC
1	29011865	29012345	2	cg02785792,cg06779961	Body,Body	Island,S_Shore	OPRD1,OPRD1	NM_000911,NM_000911	hyperM.iPSC
1	29085813	29085820	2	cg25727366,cg25287272	TSS1500;TSS1500;TSS1500;TSS1500;TSS1500,TSS1500;TSS1500;TSS1500;TSS1500;TSS1500	N_Shore,N_Shore	EPB41;EPB41;EPB41;EPB41;EPB41,EPB41;EPB41;EPB41;EPB41;EPB41	NM_001166007;NM_203343;NM_203342;NM_001166005;NM_004437,NM_001166007;NM_203343;NM_203342;NM_001166005;NM_004437	hypoM.iPSC
1	29333404	29333595	3	cg06155303,cg09264065,cg08597839	_,_	Island,Island,Island	_,_	_,_	hyperM.iPSC
1	29429603	29430407	3	cg00035847,cg11797145,cg12802086	Body;5'UTR,TSS1500;TSS1500,TSS1500;TSS1500	N_Shore,S_Shore,S_Shore	MECR;MECR,MECR;MECR,MECR;MECR	NM_016011;NM_001024732,NM_001024732;NM_016011,NM_001024732;NM_016011	hyperM.iPSC
1	29437686	29437893	2	cg22795471,cg05673731	Body;Body;Body,Body;Body;Body	Island,Island	PTPRU;PTPRU;PTPRU,PTPRU;PTPRU;PTPRU	NM_133178;NM_133177;NM_005704,NM_133178;NM_133177;NM_005704	hypoM.iPSC
1	29458440	29458485	2	cg02100997,cg00914222	Body;Body;Body,Body;Body;Body	N_Shore,Island	PTPRU;PTPRU;PTPRU,PTPRU;PTPRU;PTPRU	NM_133178;NM_133177;NM_005704,NM_133178;NM_133177;NM_005704	hypoM.iPSC
1	29934167	29934252	2	cg10103002,cg10585371	_,_	_,_	_,_	_,_	hyperM.iPSC
1	30930725	30930745	2	cg08023265,cg17484671	_,_	Island,Island	_,_	_,_	hypoM.iPSC
1	30969183	30969805	3	cg26721382,cg14183455,cg18084114	TSS200,TSS1500,TSS1500	S_Shelf,S_Shelf,S_Shelf	MATN1,MATN1,MATN1	NM_002379,NM_002379,NM_002379	hypoM.iPSC
1	31018042	31018866	2	cg00328870,cg23937078	_,_	N_Shore,Island	_,_	_,_	hyperM.iPSC
1	31426942	31427596	5	cg11958060,cg25010788,cg19731891,cg08847173,cg18232347	3'UTR,3'UTR,Body,Body,Body	N_Shore,Island,Island,Island,S_Shore	NKAIN1,NKAIN1,NKAIN1,NKAIN1,NKAIN1	NM_024522,NM_024522,NM_024522,NM_024522,NM_024522	hyperM.iPSC
1	31433513	31433613	2	cg23732779,cg02805810	1stExon,TSS200	_,_	NKAIN1,NKAIN1	NM_024522,NM_024522	hyperM.iPSC
1	31760944	31761166	2	cg16530130,cg18975659	Body,Body	_,_	LOC284551,LOC284551	NR_027085,NR_027085	hyperM.iPSC
1	31825125	31825238	2	cg12206571,cg17945560	Body,3'UTR	Island,Island	TINAGL1,TINAGL1	NM_022164,NM_022164	hyperM.iPSC
1	31857551	31857705	2	cg19420968,cg18082979	Body,Body	S_Shore,S_Shore	HCRTR1,HCRTR1	NM_001525,NM_001525	hyperM.iPSC
1	31994475	31994565	2	cg16767915,cg21822140	Body,Body	Island,Island	BAI2,BAI2	NM_001703,NM_001703	hyperM.iPSC
1	32010692	32010812	2	cg03774520,cg15694605	_,_	Island,Island	_,_	_,_	hyperM.iPSC
1	32036810	32036902	2	cg05944260,cg23268630	Body,Body	_,_	SPOCD1,SPOCD1	NM_144569,NM_144569	hyperM.iPSC
1	32054047	32054252	3	cg22169053,cg15789095,cg07802625	5'UTR,5'UTR,TSS200	_,_	SPOCD1,SPOCD1,SPOCD1	NM_144569,NM_144569,NM_144569	hypoM.iPSC
1	32310529	32310562	2	cg09325164,cg09888231	TSS1500,TSS1500	N_Shore,N_Shore	TMEM39B,TMEM39B	NM_018056,NM_018056	hyperM.iPSC
1	32417614	32419445	5	cg03523740,cg04031504,cg10266188,cg07919197,cg13785196	TSS1500,TSS1500,5'UTR,Body,Body	N_Shore,N_Shore,S_Shore,S_Shore,S_Shore	TXLNA,TXLNA,TXLNA,TXLNA,TXLNA	NM_175852,NM_175852,NM_175852,NM_175852,NM_175852	hyperM.iPSC
1	32480821	32481072	3	cg16985778,cg01627483,cg02830936	TSS1500,TSS1500,TSS1500	S_Shore,S_Shore,S_Shore	MTMR9L,MTMR9L,MTMR9L	NR_026850,NR_026850,NR_026850	hyperM.iPSC
1	32488015	32489548	4	cg07571745,cg04249754,cg01525376,cg05350315	TSS1500,TSS1500,TSS1500,5'UTR;1stExon	S_Shore,S_Shore,S_Shelf,S_Shelf	LCK,LCK,LCK,LCK;LCK	NM_005356,NM_005356,NM_005356,NM_005356;NM_005356	hyperM.iPSC
1	32529881	32529954	2	cg24468890,cg15713729	TSS1500,TSS1500	N_Shore,N_Shore	HDAC1,HDAC1	NM_004964,NM_004964	hyperM.iPSC
1	32664412	32665356	3	cg01586952,cg03439662,cg04718145	_,_	N_Shore,N_Shore,Island	_,_	_,_	hyperM.iPSC
1	32709367	32709583	2	cg09352844,cg12419176	Body,Body	_,_	ZBTB8B,ZBTB8B	NM_001145720,NM_001145720	hyperM.iPSC
1	32933378	32933487	2	cg05342835,cg17339202	Body;Body,Body;Body	_,_	SYNC;SYNC,SYNC;SYNC	NM_030786;NM_001161708,NM_030786;NM_001161708	hyperM.iPSC
1	32942145	32942437	2	cg04551500,cg12634957	TSS1500;TSS1500,TSS1500;TSS1500	S_Shore,S_Shore	SYNC;SYNC,SYNC;SYNC	NM_030786;NM_001161708,NM_030786;NM_001161708	hyperM.iPSC
1	33003657	33003969	6	cg16007395,cg17327404,cg21167532,cg12478578,cg09804503,cg04892182	Body,Body,Body,Body,Body,Body	_,_	KIAA1522,KIAA1522,KIAA1522,KIAA1522,KIAA1522,KIAA1522	NM_020888,NM_020888,NM_020888,NM_020888,NM_020888,NM_020888	hypoM.iPSC
1	33124174	33124348	3	cg11524235,cg24417499,cg21604358	TSS1500,TSS1500,TSS1500	N_Shore,N_Shore,Island	HPCA,HPCA,HPCA	NM_002143,NM_002143,NM_002143	hyperM.iPSC
1	33275328	33275397	3	cg24858658,cg15822908,cg01620569	TSS1500;TSS1500,TSS1500;TSS1500,TSS1500;TSS1500	S_Shore,S_Shore,S_Shore	AK2;AK2,AK2;AK2,AK2;AK2	NM_001625;NM_013411,NM_001625;NM_013411,NM_001625;NM_013411	hyperM.iPSC
1	33319004	33319752	2	cg12731430,cg12585759	TSS1500,5'UTR	N_Shore,Island	ADC,ADC	NM_052998,NM_052998	hyperM.iPSC
1	33365531	33366044	5	cg05627078,cg20868518,cg03549856,cg17671608,cg08128087	_,_	Island,Island,Island,Island,S_Shore	_,_	_,_	hyperM.iPSC
1	33399696	33399742	2	cg06851000,cg10975001	Body,Body	S_Shore,S_Shore	TRIM62,TRIM62	NM_018207,NM_018207	hyperM.iPSC
1	33421321	33421406	2	cg15575967,cg03036777	TSS1500,TSS1500	S_Shore,S_Shore	TRIM62,TRIM62	NM_018207,NM_018207	hyperM.iPSC
1	33871554	33871705	2	cg25104186,cg21787078	Body,Body	Island,Island	CSMD2,CSMD2	NM_052896,NM_052896	hyperM.iPSC
1	34101935	34102344	2	cg27559224,cg22599122	5'UTR;Body;TSS1500,5'UTR;Body;1stExon;5'UTR	_,_	HMGB4;CSMD2;HMGB4,HMGB4;CSMD2;HMGB4;HMGB4	NM_145205;NM_052896;NM_001008728,NM_145205;NM_052896;NM_001008728;NM_001008728	hyperM.iPSC
1	34416839	34417696	2	cg04486873,cg00124902	Body;5'UTR,Body;5'UTR	S_Shore,S_Shelf	C1orf94;C1orf94,C1orf94;C1orf94	NM_001134734;NM_032884,NM_001134734;NM_032884	hyperM.iPSC
1	34993108	34993118	2	cg07014349,cg25373430	TSS200,TSS200	_,_	GJB5,GJB5	NM_005268,NM_005268	hyperM.iPSC
1	34995642	34996651	3	cg17102325,cg21206180,cg06536967	Body,Body,3'UTR;TSS1500	N_Shelf,N_Shelf,N_Shelf	GJB5,GJB5,GJB5;GJB4	NM_005268,NM_005268,NM_005268;NM_153212	hyperM.iPSC
1	35358945	35359236	5	cg25035631,cg12901910,cg09834465,cg07105947,cg14615266	_,_	Island,Island,Island,Island,S_Shore	_,_	_,_	hyperM.iPSC
1	35428912	35429289	2	cg20797674,cg03515869	Body,Body	N_Shore,N_Shore	SFPQ,SFPQ	NM_005066,NM_005066	hyperM.iPSC
1	35689459	35689942	2	cg12212217,cg11983385	Body,Body	_,_	KIAA0319L,KIAA0319L	NM_024874,NM_024874	hyperM.iPSC
1	35799006	35799198	2	cg18125241,cg22402261	Body;Body;Body,Body;Body;Body	S_Shelf,S_Shelf	NCDN;NCDN;NCDN,NCDN;NCDN;NCDN	NM_001014841;NM_014284;NM_001014839,NM_001014841;NM_014284;NM_001014839	hyperM.iPSC
1	35812242	35812472	3	cg14962509,cg17474422,cg05845757	Body,Body,Body	Island,Island,Island	TFAP2E,TFAP2E,TFAP2E	NM_178548,NM_178548,NM_178548	hypoM.iPSC
1	35815020	35815025	2	cg07196426,cg19163067	Body,Body	Island,Island	TFAP2E,TFAP2E	NM_178548,NM_178548	hypoM.iPSC
1	35880793	35880820	4	cg12413579,cg24109894,cg21680327,cg21439896	TSS1500,TSS1500,TSS1500,TSS1500	S_Shore,S_Shore,S_Shore,S_Shore	PSMB2,PSMB2,PSMB2,PSMB2	NM_002794,NM_002794,NM_002794,NM_002794	hyperM.iPSC
1	36326318	36326913	3	cg17877898,cg06814637,cg12277532	Body;TSS1500,TSS200,TSS200	N_Shore,N_Shore,Island	TEKT2;ADPRHL2,ADPRHL2,ADPRHL2	NM_014466;NM_017825,NM_017825,NM_017825	hyperM.iPSC
1	36338443	36338747	2	cg19046959,cg22380322	TSS200,TSS1500	_,_	COL8A2,COL8A2	NM_005202,NM_005202	hyperM.iPSC
1	36414424	36414571	2	cg01501018,cg09890687	Body,Body	Island,Island	MAP7D1,MAP7D1	NM_018067,NM_018067	hypoM.iPSC
1	36416568	36417436	5	cg05364072,cg19002149,cg13962153,cg08458912,cg11084518	Body,Body,Body,Body,Body	Island,Island,Island,Island,S_Shore	MAP7D1,MAP7D1,MAP7D1,MAP7D1,MAP7D1	NM_018067,NM_018067,NM_018067,NM_018067,NM_018067	hypoM.iPSC
1	36461885	36462064	2	cg23691858,cg13134448	TSS1500,TSS1500	N_Shore,N_Shore	THRAP3,THRAP3	NM_005119,NM_005119	hyperM.iPSC
1	36625050	36625543	2	cg17971578,cg00913954	TSS1500,TSS1500	S_Shore,S_Shore	STK40,STK40	NM_032017,NM_032017	hyperM.iPSC
1	36688427	36689088	3	cg27439456,cg08878450,cg22397854	Body;Body,1stExon;1stExon,TSS1500;TSS1500	Island,Island,S_Shore	OSCP1;OSCP1,OSCP1;OSCP1,OSCP1;OSCP1	NM_206837;NM_145047,NM_145047;NM_206837,NM_145047;NM_206837	hyperM.iPSC
1	36710432	36710732	2	cg17219729,cg11227872	Body;Body;Body;Body,Body;Body;Body;Body	_,_	CSF3R;CSF3R;CSF3R;CSF3R,CSF3R;CSF3R;CSF3R;CSF3R	NM_156038;NM_156039;NM_000760;NM_172313,NM_156038;NM_156039;NM_000760;NM_172313	hyperM.iPSC
1	36720900	36721568	4	cg11674933,cg14523574,cg13084345,cg07285167	5'UTR;5'UTR;5'UTR;5'UTR,TSS200;TSS200;TSS200;TSS200,TSS1500;TSS1500;TSS1500;TSS1500,TSS1500;TSS1500;TSS1500;TSS1500	_,_	CSF3R;CSF3R;CSF3R;CSF3R,CSF3R;CSF3R;CSF3R;CSF3R,CSF3R;CSF3R;CSF3R;CSF3R,CSF3R;CSF3R;CSF3R;CSF3R	NM_156039;NM_000760;NM_156038;NM_172313,NM_156038;NM_156039;NM_000760;NM_172313,NM_172313;NM_000760;NM_156038;NM_156039,NM_172313;NM_000760;NM_156038;NM_156039	hyperM.iPSC
1	37546482	37546490	2	cg11202686,cg02902637	_,_	_,_	_,_	_,_	hyperM.iPSC
1	37556458	37556831	4	cg04851505,cg03085170,cg05846868,cg01765111	_,_	Island,Island,Island,Island	_,_	_,_	hyperM.iPSC
1	37927954	37928126	3	cg22501998,cg01933946,cg00308767	Body,Body,Body	N_Shore,N_Shore,N_Shore	C1orf109,C1orf109,C1orf109	NM_017850,NM_017850,NM_017850	hyperM.iPSC
1	37929132	37929944	4	cg12339802,cg27170260,cg22449745,cg03714163	TSS1500,TSS1500,TSS1500;TSS1500,TSS1500;TSS1500	N_Shore,N_Shore,N_Shore,Island	C1orf109,C1orf109,CDCA8;C1orf109,CDCA8;C1orf109	NM_017850,NM_017850,NM_018101;NM_017850,NM_018101;NM_017850	hyperM.iPSC
1	37999399	38000295	5	cg12548638,cg12746947,cg11521434,cg01379846,cg12012383	3'UTR;Body,Body;Body,Body;Body,Body;Body,Body;Body	N_Shore,Island,Island,Island,Island	EPHA10;EPHA10,EPHA10;EPHA10,EPHA10;EPHA10,EPHA10;EPHA10,EPHA10;EPHA10	NM_173641;NM_001099439,NM_173641;NM_001099439,NM_173641;NM_001099439,NM_173641;NM_001099439,NM_173641;NM_001099439	hyperM.iPSC
1	38002063	38003733	3	cg01967642,cg12158389,cg00667938	Body;Body,Body;Body,TSS1500;TSS1500	N_Shore,Island,S_Shore	EPHA10;EPHA10,EPHA10;EPHA10,EPHA10;EPHA10	NM_173641;NM_001099439,NM_173641;NM_001099439,NM_001099439;NM_173641	hyperM.iPSC
1	38239131	38239264	2	cg08423562,cg21680719	5'UTR,5'UTR	_,N_Shelf	FHL3,FHL3	NM_004468,NM_004468	hyperM.iPSC
1	38250508	38250670	2	cg11425754,cg17428744	TSS1500,TSS1500	N_Shore,Island	UTP11L,UTP11L	NM_016037,NM_016037	hyperM.iPSC
1	38372213	38372786	4	cg26164879,cg03331978,cg25879102,cg24080008	_,_	_,_	_,_	_,_	hyperM.iPSC
1	38660012	38660732	2	ch.1.38660012F,ch.1.1224902R	_,_	_,_	_,_	_,_	hyperM.iPSC
1	38808521	38808569	2	cg06865451,cg18270687	_,_	_,_	_,_	_,_	hyperM.iPSC
1	38958367	38958738	2	cg05161980,cg02920235	_,_	_,_	_,_	_,_	hyperM.iPSC
1	39021902	39022251	5	cg11391637,cg18150908,cg26113488,cg14667685,cg12410921	_,_	_,_	_,_	_,_	hyperM.iPSC
1	39053753	39054590	5	cg19250639,cg13976375,cg23237972,cg13202591,cg19224645	_,_	N_Shelf,N_Shore,N_Shore,N_Shore,N_Shore	_,_	_,_	hyperM.iPSC
1	39812603	39813076	2	cg01858866,cg24142464	Body;Body;Body,Body;Body;Body	N_Shore,N_Shore	PABPC4;PABPC4;PABPC4,PABPC4;PABPC4;PABPC4	NM_001135654;NM_003819;NM_001135653,NM_001135654;NM_003819;NM_001135653	hyperM.iPSC
1	39909350	39910639	3	cg06357371,cg10052561,cg00990022	Body,Body,TSS1500	N_Shore,Island,Island	NT5C1A,NT5C1A,NT5C1A	NM_032526,NM_032526,NM_032526	hyperM.iPSC
1	40134497	40135494	2	cg12583369,cg13363823	3'UTR;3'UTR,3'UTR;3'UTR	_,N_Shelf	MYCL1;MYCL1,MYCL1;MYCL1	NM_001033082;NM_001033081,NM_001033082;NM_001033081	hyperM.iPSC
1	40160810	40160982	3	cg02630477,cg04218880,cg15196156	_,_	_,_	_,_	_,_	hypoM.iPSC
1	40192886	40193124	3	cg01869896,cg27173717,cg23962483	TSS1500;TSS1500,TSS1500;TSS1500,TSS1500;TSS1500	N_Shore,Island,Island	MFSD2A;MFSD2A,MFSD2A;MFSD2A,MFSD2A;MFSD2A	NM_032793;NM_001136493,NM_032793;NM_001136493,NM_032793;NM_001136493	hyperM.iPSC
1	40335151	40335992	2	cg17130791,cg18212197	Body;Body,TSS1500;TSS1500	N_Shore,S_Shore	PPT1;PPT1,PPT1;PPT1	NM_000310;NM_001142604,NM_000310;NM_001142604	hyperM.iPSC
1	40370981	40371359	4	cg01015662,cg07405182,cg13451356,cg16555417	_,_	N_Shore,N_Shore,Island,Island	_,_	_,_	hyperM.iPSC
1	40399186	40399323	2	cg18646240,cg20929609	TSS1500,TSS1500	N_Shore,N_Shore	RLF,RLF	NM_012421,NM_012421	hyperM.iPSC
1	40891862	40892221	3	cg03515933,cg03017091,cg09845314	5'UTR,5'UTR,5'UTR	N_Shore,N_Shore,N_Shore	RIMS3,RIMS3,RIMS3	NM_014747,NM_014747,NM_014747	hyperM.iPSC
1	40901461	40902342	2	cg13935127,cg24517738	5'UTR,5'UTR	N_Shelf,N_Shore	RIMS3,RIMS3	NM_014747,NM_014747	hyperM.iPSC
1	41075943	41076692	3	cg20276780,cg07906262,cg23109867	Body;Body,Body;Body,Body;Body	Island,Island,Island	KCNQ4;KCNQ4,KCNQ4;KCNQ4,KCNQ4;KCNQ4	NM_004700;NM_172163,NM_004700;NM_172163,NM_004700;NM_172163	hyperM.iPSC
1	41217238	41217416	3	cg17045772,cg01002622,cg19092368	TSS1500,TSS1500,TSS200	N_Shore,N_Shore,N_Shore	CTPS,CTPS,CTPS	NM_001905,NM_001905,NM_001905	hypoM.iPSC
1	41754376	41754979	2	cg15482882,cg13170051	Body;Body,Body;Body	Island,S_Shore	HIVEP3;HIVEP3,HIVEP3;HIVEP3	NM_024503;NM_001127714,NM_024503;NM_001127714	hyperM.iPSC
1	41899311	41900018	3	cg24351658,cg08915922,cg21415643	5'UTR;5'UTR,5'UTR;5'UTR,5'UTR;5'UTR	N_Shore,Island,Island	HIVEP3;HIVEP3,HIVEP3;HIVEP3,HIVEP3;HIVEP3	NM_024503;NM_001127714,NM_024503;NM_001127714,NM_024503;NM_001127714	hyperM.iPSC
1	42158168	42158249	2	cg15542713,cg16145216	TSS1500;TSS1500,TSS1500;TSS1500	S_Shore,S_Shore	HIVEP3;HIVEP3,HIVEP3;HIVEP3	NM_024503;NM_001127714,NM_024503;NM_001127714	hypoM.iPSC
1	42383973	42384194	2	cg01594290,cg24998527	_,_	N_Shore,Island	_,_	_,_	hyperM.iPSC
1	42390628	42391750	6	cg24583987,cg11837471,cg10179693,cg15545316,cg14258285,cg19728577	TSS1500,TSS1500,TSS200,TSS200,TSS200,1stExon	_,_	GUCA2B,GUCA2B,GUCA2B,GUCA2B,GUCA2B,GUCA2B	NM_007102,NM_007102,NM_007102,NM_007102,NM_007102,NM_007102	hyperM.iPSC
1	42392950	42393929	2	cg16309224,cg10443237	Body,3'UTR	_,_	GUCA2B,GUCA2B	NM_007102,NM_007102	hyperM.iPSC
1	42402385	42403261	3	cg06003187,cg09212118,cg18856261	Body,TSS200,TSS1500	_,_	GUCA2A,GUCA2A,GUCA2A	NM_033553,NM_033553,NM_033553	hyperM.iPSC
1	42574348	42574552	2	cg18174678,cg17985311	TSS1500,TSS1500	S_Shore,S_Shore	FOXJ3,FOXJ3	NM_014947,NM_014947	hyperM.iPSC
1	42619487	42619642	2	cg19646327,cg14981313	Body,Body	Island,S_Shore	RIMKLA,RIMKLA	NM_173642,NM_173642	hyperM.iPSC
1	42694169	42694171	2	cg06520846,cg06346081	TSS1500;1stExon;5'UTR;TSS1500;1stExon,TSS1500;1stExon;5'UTR;TSS1500;1stExon	N_Shore,N_Shore	PPCS;ZMYND12;ZMYND12;PPCS;ZMYND12,PPCS;ZMYND12;ZMYND12;PPCS;ZMYND12	NM_024664;NM_032257;NM_001146192;NM_001077447;NM_001146192,NM_024664;NM_032257;NM_001146192;NM_001077447;NM_001146192	hyperM.iPSC
1	42978563	42978624	2	cg11075745,cg27507254	TSS200;TSS200,TSS200;TSS200	S_Shore,S_Shore	CLDN19;CLDN19,CLDN19;CLDN19	NM_148960;NM_001123395,NM_148960;NM_001123395	hypoM.iPSC
1	42982163	42982193	2	cg00060956,cg24542667	_,_	_,_	_,_	_,_	hyperM.iPSC
1	43023278	43023840	6	cg13781744,cg07515989,cg24634568,cg18391694,cg27232866,cg19254906	_,_	N_Shore,Island,Island,Island,Island,S_Shore	_,_	_,_	hyperM.iPSC
1	43054265	43054381	2	cg18142162,cg23839159	Body;TSS1500,Body;TSS1500	N_Shore,N_Shore	CCDC23;ERMAP,CCDC23;ERMAP	NM_199342;NM_001017922,NM_199342;NM_001017922	hyperM.iPSC
1	43069054	43069078	2	cg19749224,cg25285237	Body;Body,Body;Body	_,_	ERMAP;ERMAP,ERMAP;ERMAP	NM_001017922;NM_018538,NM_001017922;NM_018538	hypoM.iPSC
1	43124447	43125330	2	cg06372967,cg01934756	_,_	N_Shore,N_Shore	_,_	_,_	hyperM.iPSC
1	43306383	43306784	5	cg02584756,cg14207654,cg10511249,cg18153322,cg14780649	_,_	N_Shore,Island,Island,Island,Island	_,_	_,_	hyperM.iPSC
1	43523950	43524091	4	cg12752420,cg23800435,cg24464789,cg02990330	TSS200;TSS200,TSS200;TSS200,TSS1500;TSS1500,TSS1500;TSS1500	_,_	C1orf210;C1orf210,C1orf210;C1orf210,C1orf210;C1orf210,C1orf210;C1orf210	NM_001164829;NM_182517,NM_001164829;NM_182517,NM_001164829;NM_182517,NM_001164829;NM_182517	hypoM.iPSC
1	43626723	43627642	3	cg10500219,cg07458516,cg26805306	Body;TSS1500;Body,Body;TSS1500;Body,Body;TSS1500;Body	N_Shore,N_Shore,N_Shore	MED8;C1orf84;MED8,MED8;C1orf84;MED8,MED8;C1orf84;MED8	NM_052877;NM_001012961;NM_201542,NM_052877;NM_001012961;NM_201542,NM_052877;NM_001012961;NM_201542	hyperM.iPSC
1	43628773	43629060	2	cg06188908,cg12235622	Body;TSS1500;TSS1500,Body;TSS1500;TSS1500	S_Shore,S_Shore	C1orf84;MED8;MED8,C1orf84;MED8;MED8	NM_001012961;NM_052877;NM_201542,NM_001012961;NM_052877;NM_201542	hyperM.iPSC
1	43692677	43692690	2	cg21219903,cg25151532	TSS200,TSS200	S_Shore,S_Shore	HYI,HYI	NM_031207,NM_031207	hyperM.iPSC
1	43804343	43804413	2	cg22875872,cg10881128	Body;Body,Body;Body	Island,Island	PTPRF;PTPRF,PTPRF;PTPRF	NM_002840;NM_130440,NM_002840;NM_130440	hyperM.iPSC
1	43887774	43887790	2	cg05886813,cg19743044	TSS1500,TSS1500	N_Shore,N_Shore	KDM4A,KDM4A	NM_014663,NM_014663	hyperM.iPSC
1	44173896	44175109	5	cg26074140,cg23212751,cg18083817,cg13606994,cg12908607	TSS1500;5'UTR;1stExon;5'UTR;5'UTR;5'UTR,TSS1500;Body;Body;Body;Body,1stExon;Body;Body;Body;Body,Body;Body;Body;Body;Body,3'UTR;3'UTR;3'UTR;3'UTR;3'UTR	N_Shore,N_Shore,Island,Island,S_Shore	ARTN;ARTN;ARTN;ARTN;ARTN;ARTN,ARTN;ARTN;ARTN;ARTN;ARTN,ARTN;ARTN;ARTN;ARTN;ARTN,ARTN;ARTN;ARTN;ARTN;ARTN,ARTN;ARTN;ARTN;ARTN;ARTN	NM_057160;NM_003976;NM_003976;NM_057090;NM_001136215;NM_057091,NM_057160;NM_057091;NM_003976;NM_057090;NM_001136215,NM_057160;NM_057091;NM_003976;NM_057090;NM_001136215,NM_057091;NM_003976;NM_057160;NM_057090;NM_001136215,NM_057160;NM_001136215;NM_003976;NM_057090;NM_057091	hypoM.iPSC
1	44184502	44184561	2	cg04123373,cg24699418	TSS1500,TSS1500	N_Shore,N_Shore	IPO13,IPO13	NM_014652,NM_014652	hyperM.iPSC
1	44218566	44219187	4	cg17170190,cg11337388,cg02416986,cg09666532	5'UTR;TSS1500,5'UTR;TSS200,1stExon;5'UTR;5'UTR,5'UTR;5'UTR	S_Shore,S_Shore,S_Shore,S_Shore	B4GALT2;B4GALT2,B4GALT2;B4GALT2,B4GALT2;B4GALT2;B4GALT2,B4GALT2;B4GALT2	NM_003780;NM_001005417,NM_003780;NM_001005417,NM_001005417;NM_001005417;NM_003780,NM_001005417;NM_003780	hyperM.iPSC
1	44229326	44229540	2	cg22816909,cg00649515	3'UTR;TSS1500;3'UTR,TSS1500	N_Shore,N_Shore	B4GALT2;CCDC24;B4GALT2,CCDC24	NM_003780;NM_152499;NM_001005417,NM_152499	hyperM.iPSC
1	44270124	44270281	3	cg04833514,cg04093149,cg18183642	TSS1500,TSS1500,TSS1500	S_Shore,S_Shore,S_Shore	SLC6A9,SLC6A9,SLC6A9	NM_001024845,NM_001024845,NM_001024845	hypoM.iPSC
1	44281651	44282162	2	cg04786667,cg16583987	_,_	_,_	_,_	_,_	hyperM.iPSC
1	44286464	44286508	2	cg07569994,cg11717881	_,_	_,_	_,_	_,_	hyperM.iPSC
1	44499597	44499900	4	cg04486940,cg16681083,cg26233866,cg11424674	Body,Body,Body,Body	_,_	ERI3,ERI3,ERI3,ERI3	NM_024066,NM_024066,NM_024066,NM_024066	hypoM.iPSC
1	44593750	44593756	2	cg04166874,cg02674114	TSS1500,TSS1500	S_Shore,S_Shore	ERI3,ERI3	NM_024066,NM_024066	hyperM.iPSC
1	44643275	44643301	2	cg17329287,cg21686694	TSS1500,TSS1500	N_Shore,N_Shore	RNF220,RNF220	NM_018150,NM_018150	hypoM.iPSC
1	44855291	44855794	6	cg24591770,cg20820767,cg00150520,cg10329345,cg13189207,cg20944964	Body,Body,Body,Body,Body,Body	N_Shore,Island,Island,Island,Island,Island	RNF220,RNF220,RNF220,RNF220,RNF220,RNF220	NM_018150,NM_018150,NM_018150,NM_018150,NM_018150,NM_018150	hypoM.iPSC
1	44878991	44879082	2	cg24317827,cg07018026	Body,Body	_,_	RNF220,RNF220	NM_018150,NM_018150	hyperM.iPSC
1	44962330	44962884	2	cg15605235,cg06745753	Body,Body	Island,Island	C1orf228,C1orf228	NM_001145636,NM_001145636	hyperM.iPSC
1	45016105	45016547	2	cg03533141,cg13553147	Body;Body;TSS1500,TSS200;Body	S_Shore,S_Shelf	SNORD38A;RPS8;SNORD38B,SNORD38B;RPS8	NR_001456;NM_001012;NR_001457,NR_001457;NM_001012	hyperM.iPSC
1	45046082	45047100	5	cg24254387,cg08462306,cg03434029,cg11448683,cg14565781	TSS1500;TSS1500,TSS1500;TSS1500,TSS1500;TSS200,TSS1500;TSS200,1stExon	S_Shore,S_Shore,S_Shore,S_Shore,S_Shelf	BTBD19;TCTEX1D4,BTBD19;TCTEX1D4,TCTEX1D4;BTBD19,TCTEX1D4;BTBD19,BTBD19	NM_001136537;NM_001013632,NM_001136537;NM_001013632,NM_001013632;NM_001136537,NM_001013632;NM_001136537,NM_001136537	hyperM.iPSC
1	45048925	45049124	2	cg16651877,cg17093466	Body,Body	N_Shelf,N_Shelf	BTBD19,BTBD19	NM_001136537,NM_001136537	hyperM.iPSC
1	45051558	45051719	2	cg06766016,cg19530728	Body,Body	Island,Island	BTBD19,BTBD19	NM_001136537,NM_001136537	hypoM.iPSC
1	45225096	45225192	2	cg12044615,cg16604218	TSS200;TSS200,TSS1500;TSS1500	S_Shore,S_Shore	EIF2B3;EIF2B3,EIF2B3;EIF2B3	NM_001166588;NM_020365,NM_020365;NM_001166588	hyperM.iPSC
1	45565247	45565320	4	cg21868134,cg15071854,cg12178578,cg14913111	1stExon;5'UTR,1stExon;5'UTR,1stExon;5'UTR,1stExon;5'UTR	Island,Island,Island,Island	HPDL;HPDL,HPDL;HPDL,HPDL;HPDL,HPDL;HPDL	NM_032756;NM_032756,NM_032756;NM_032756,NM_032756;NM_032756,NM_032756;NM_032756	hyperM.iPSC
1	45579088	45579473	2	cg09360654,cg17412005	TSS1500;TSS1500;TSS1500;Body;TSS1500;TSS1500;TSS1500,TSS1500;TSS1500;TSS1500;Body;TSS1500;TSS1500;TSS1500	S_Shore,S_Shore	MUTYH;MUTYH;MUTYH;TOE1;MUTYH;MUTYH;MUTYH,MUTYH;MUTYH;MUTYH;TOE1;MUTYH;MUTYH;MUTYH	NM_001048174;NM_012222;NM_001048173;NM_025077;NM_001048171;NM_001048172;NM_001128425,NM_001048174;NM_012222;NM_001048173;NM_025077;NM_001048171;NM_001048172;NM_001128425	hyperM.iPSC
1	45737607	45738036	2	cg11803389,cg04700938	Body;TSS1500,5'UTR;1stExon;TSS1500	N_Shore,N_Shore	CCDC163P;MMACHC,CCDC163P;CCDC163P;MMACHC	NM_001102601;NM_015506,NM_001102601;NM_001102601;NM_015506	hyperM.iPSC
1	45760451	45760485	2	cg02631906,cg11833889	TSS1500;TSS1500;TSS1500,TSS1500;TSS1500;TSS1500	S_Shore,S_Shore	PRDX1;PRDX1;PRDX1,PRDX1;PRDX1;PRDX1	NM_181696;NM_002574;NM_181697,NM_181696;NM_002574;NM_181697	hyperM.iPSC
1	45860923	45861632	3	cg11750580,cg14220678,cg02987388	Body,Body,Body	Island,Island,Island	CCDC17,CCDC17,CCDC17	NM_001114938,NM_001114938,NM_001114938	hyperM.iPSC
1	45988363	45989258	4	cg17156633,cg09580965,cg01237807,cg27171890	5'UTR;5'UTR,5'UTR;5'UTR,5'UTR;5'UTR,TSS200;TSS200	N_Shore,N_Shore,N_Shore,S_Shore	IPP;IPP,IPP;IPP,IPP;IPP,IPP;IPP	NM_005897;NM_001145349,NM_005897;NM_001145349,NM_005897;NM_001145349,NM_001145349;NM_005897	hyperM.iPSC
1	46405052	46405740	6	cg15711727,cg14796305,cg00041872,cg27636310,cg14709691,cg06974930	_,_	N_Shore,N_Shore,Island,Island,Island,S_Shore	_,_	_,_	hyperM.iPSC
1	46421719	46422557	2	cg25369262,cg05371506	Body,Body	_,_	TSPAN1,TSPAN1	NM_005727,NM_005727	hyperM.iPSC
1	46437036	46437185	2	cg22112435,cg04036898	Body;TSS1500,Body;TSS1500	_,_	POMGNT1;POMGNT1,POMGNT1;POMGNT1	NR_024332;NM_017739,NR_024332;NM_017739	hyperM.iPSC
1	46632258	46632378	4	cg06911238,cg12671744,cg18261491,cg16267850	TSS1500,TSS200,TSS200,TSS200	N_Shore,Island,Island,Island	FAAH,FAAH,FAAH,FAAH	NM_001441,NM_001441,NM_001441,NM_001441	hyperM.iPSC
1	46712453	46713103	4	cg25019343,cg21692450,cg02042310,cg00346985	_,_	N_Shore,Island,Island,S_Shore	_,_	_,_	hyperM.iPSC
1	46731062	46731443	2	cg27564123,cg14914422	_,_	S_Shore,S_Shore	_,_	_,_	hypoM.iPSC
1	46789504	46790659	3	cg23322161,cg04831174,cg26191882	TSS200,TSS1500,TSS1500	_,_	KNCN,KNCN,KNCN	NM_001097611,NM_001097611,NM_001097611	hyperM.iPSC
1	46855354	46855456	3	cg05965334,cg00950809,cg05376185	TSS1500,TSS1500,TSS1500	S_Shore,S_Shore,S_Shore	MOBKL2C,MOBKL2C,MOBKL2C	NM_201403,NM_201403,NM_201403	hyperM.iPSC
1	47428186	47429010	4	cg01074797,cg09258479,cg06619077,cg26523175	1stExon,TSS200,TSS1500,TSS1500	_,_	PDZK1IP1,PDZK1IP1,PDZK1IP1,PDZK1IP1	NM_005764,NM_005764,NM_005764,NM_005764	hyperM.iPSC
1	47466460	47469092	9	cg02235261,cg11399254,cg10026317,cg06955484,cg19797376,cg18131548,cg26891410,cg06209689,cg01147107	5'UTR,5'UTR,5'UTR;1stExon,5'UTR;1stExon,TSS200,TSS1500,TSS1500,TSS1500,TSS1500	N_Shelf,N_Shore,N_Shore,N_Shore,N_Shore,N_Shore,N_Shore,N_Shore,Island	TAL1,TAL1,TAL1;TAL1,TAL1;TAL1,TAL1,TAL1,TAL1,TAL1,TAL1	NM_003189,NM_003189,NM_003189;NM_003189,NM_003189;NM_003189,NM_003189,NM_003189,NM_003189,NM_003189,NM_003189	hypoM.iPSC
1	47655523	47655821	2	cg23115387,cg27175287	1stExon,3'UTR;1stExon	Island,S_Shore	FOXE3,FOXE3;FOXE3	NM_012186,NM_012186;NM_012186	hypoM.iPSC
1	47670163	47674672	11	cg04078221,cg08892370,cg05658236,cg18595867,cg13851904,cg09277376,cg25880954,cg26518431,cg23659056,cg24114899,cg16342298	_,Body,Body,Body,Body,Body,TSS1500;TSS1500,TSS1500;TSS200,TSS1500;TSS200,TSS1500;1stExon;5'UTR,1stExon;5'UTR	N_Shore,N_Shore,N_Shore,Island,Island,Island,S_Shore,N_Shore,N_Shore,N_Shore,N_Shore	_,MGC12982,MGC12982,MGC12982,MGC12982,MGC12982,MGC12982;FOXD2,MGC12982;FOXD2,MGC12982;FOXD2,MGC12982;FOXD2;FOXD2,FOXD2;FOXD2	_,NR_026878,NR_026878,NR_026878,NR_026878,NR_026878,NR_026878;NM_004474,NR_026878;NM_004474,NR_026878;NM_004474,NR_026878;NM_004474;NM_004474,NM_004474;NM_004474	hypoM.iPSC
1	47677654	47679641	5	cg16076997,cg15691862,cg14513071,cg02294302,cg11393040	1stExon,3'UTR;1stExon,3'UTR;1stExon,3'UTR;1stExon,_	Island,Island,Island,S_Shore,S_Shore	FOXD2,FOXD2;FOXD2,FOXD2;FOXD2,FOXD2;FOXD2,_	NM_004474,NM_004474;NM_004474,NM_004474;NM_004474,NM_004474;NM_004474,_	hypoM.iPSC
1	47681821	47683501	4	cg16013720,cg21475270,cg24525176,cg00203284	_,_	N_Shore,N_Shore,Island,Island	_,_	_,_	hypoM.iPSC
1	47949342	47949848	3	cg06320401,cg11082779,cg00022054	_,_	S_Shore,S_Shore,S_Shore	_,_	_,_	hyperM.iPSC
1	47963713	47964467	2	cg08275015,cg16125989	_,_	S_Shore,S_Shore	_,_	_,_	hyperM.iPSC
1	48222482	48222805	3	cg05138148,cg08456859,cg04871498	_,_	Island,Island,S_Shore	_,_	_,_	hypoM.iPSC
1	48225052	48225327	3	cg18376692,cg24090990,cg07202054	_,_	S_Shelf,S_Shelf,S_Shelf	_,_	_,_	hyperM.iPSC
1	48230111	48231050	2	cg25303772,cg27522154	_,_	N_Shelf,N_Shore	_,_	_,_	hyperM.iPSC
1	48347972	48348489	2	cg00996053,cg00983803	Body,Body	_,_	SKINTL,SKINTL	NR_026749,NR_026749	hyperM.iPSC
1	48476542	48477418	2	cg05042706,cg25469314	Body;Body,Body;Body	_,_	SLC5A9;SLC5A9,SLC5A9;SLC5A9	NM_001011547;NM_001135181,NM_001011547;NM_001135181	hyperM.iPSC
1	50341434	50342197	2	cg13909533,cg26301690	TSS1500;Body,Body;5'UTR;1stExon	_,_	ELAVL4;ELAVL4,ELAVL4;ELAVL4;ELAVL4	NM_001144776;NM_001144777,NM_001144777;NM_001144776;NM_001144776	hyperM.iPSC
1	50652147	50652737	3	cg07584563,cg08194553,cg26682922	_,_	N_Shore,N_Shore,N_Shore	_,_	_,_	hyperM.iPSC
1	50660221	50661178	2	cg06159394,cg17800654	5'UTR,5'UTR	Island,Island	DMRTA2,DMRTA2	NM_032110,NM_032110	hypoM.iPSC
1	50666057	50666418	2	cg11665991,cg25281186	_,_	Island,S_Shore	_,_	_,_	hypoM.iPSC
1	51214721	51214906	2	cg23090529,cg21140898	_,_	N_Shore,N_Shore	_,_	_,_	hypoM.iPSC
1	51583480	51583773	2	cg10653240,cg26913502	TSS200,TSS1500	S_Shore,S_Shore	TTC39A,TTC39A	NM_001144832,NM_001144832	hyperM.iPSC
1	51757847	51758842	2	cg01447748,cg01970336	TSS1500,TSS1500	S_Shore,S_Shore	EPS15,EPS15	NM_001981,NM_001981	hyperM.iPSC
1	52271090	52272167	4	cg00691240,cg08855861,cg10605904,cg19894943	Body;1stExon,Body;1stExon,Body;1stExon,Body;TSS200	Island,Island,Island,S_Shore	TXNDC12;KTI12,TXNDC12;KTI12,TXNDC12;KTI12,TXNDC12;KTI12	NM_015913;NM_138417,NM_015913;NM_138417,NM_015913;NM_138417,NM_015913;NM_138417	hyperM.iPSC
1	52840225	52841175	3	cg18087326,cg23272399,cg02453146	TSS1500,Body,Body	N_Shore,Island,Island	GPX7,GPX7,GPX7	NM_015696,NM_015696,NM_015696	hyperM.iPSC
1	53300000	53300012	2	cg25629790,cg04918175	TSS1500,TSS1500	N_Shore,N_Shore	PODN,PODN	NM_153703,NM_153703	hyperM.iPSC
1	53301559	53301579	2	cg16899892,cg01568973	Body,Body	Island,S_Shore	PODN,PODN	NM_153703,NM_153703	hypoM.iPSC
1	53330980	53331589	2	cg14212966,cg15526153	Body,Body	Island,S_Shore	SLC1A7,SLC1A7	NM_006671,NM_006671	hyperM.iPSC
1	53373329	53373477	3	cg00317626,cg20326410,cg09134876	Body,Body,Body	_,_	SLC1A7,SLC1A7,SLC1A7	NM_006671,NM_006671,NM_006671	hyperM.iPSC
1	53566799	53567348	3	cg04154290,cg17095731,cg26191586	TSS1500;TSS1500;TSS1500;TSS1500,TSS1500;TSS1500;TSS1500;TSS1500,TSS1500;TSS1500;TSS1500;TSS1500	S_Shore,S_Shore,S_Shore	LRP8;LRP8;LRP8;LRP8,LRP8;LRP8;LRP8;LRP8,LRP8;LRP8;LRP8;LRP8	NM_033300;NM_017522;NM_001018054;NM_004631,NM_033300;NM_017522;NM_001018054;NM_004631,NM_033300;NM_017522;NM_001018054;NM_004631	hypoM.iPSC
1	53967507	53968418	2	cg20148127,cg27311970	5'UTR,5'UTR	_,_	GLIS1,GLIS1	NM_147193,NM_147193	hyperM.iPSC
1	53972413	53973175	5	cg27397757,cg21142398,cg05040219,cg18767735,cg00454274	5'UTR;1stExon,TSS1500,TSS1500,TSS1500,TSS1500	N_Shelf,N_Shelf,N_Shelf,N_Shelf,N_Shelf	GLIS1;GLIS1,GLIS1,GLIS1,GLIS1,GLIS1	NM_147193;NM_147193,NM_147193,NM_147193,NM_147193,NM_147193	hyperM.iPSC
1	53976136	53976266	2	cg05927190,cg17786642	_,_	Island,Island	_,_	_,_	hypoM.iPSC
1	54292702	54293020	2	cg08526412,cg01182697	Body;TSS1500,Body;TSS1500	S_Shore,S_Shore	C1orf83;TMEM59,C1orf83;TMEM59	NM_153035;NM_004872,NM_153035;NM_004872	hyperM.iPSC
1	54392033	54392291	3	cg26185508,cg17035984,cg20777437	TSS200,TSS1500,TSS1500	_,_	CDCP2,CDCP2,CDCP2	NM_201546,NM_201546,NM_201546	hyperM.iPSC
1	54713720	54713758	2	cg24834436,cg08106066	_,_	S_Shore,S_Shore	_,_	_,_	hypoM.iPSC
1	54786105	54786544	3	cg02905900,cg10266490,cg21448423	TSS1500;TSS1500,TSS200;TSS200,1stExon;5'UTR;1stExon;5'UTR	_,_	ACOT11;ACOT11,ACOT11;ACOT11,ACOT11;ACOT11;ACOT11;ACOT11	NM_147161;NM_015547,NM_147161;NM_015547,NM_015547;NM_015547;NM_147161;NM_147161	hyperM.iPSC
1	55038884	55039881	10	cg18972998,cg24697184,cg26413174,cg19808825,cg22130834,cg04871778,cg24685134,cg11247674,cg20569588,cg02935904	1stExon;1stExon,1stExon;1stExon,1stExon;1stExon,TSS200;TSS200,TSS200;TSS200,TSS200;TSS200,TSS1500;TSS1500,TSS1500;TSS1500,TSS1500;TSS1500,TSS1500;TSS1500	Island,Island,Island,Island,Island,S_Shore,S_Shore,S_Shore,S_Shore,S_Shore	TTC22;TTC22,TTC22;TTC22,TTC22;TTC22,TTC22;TTC22,TTC22;TTC22,TTC22;TTC22,TTC22;TTC22,TTC22;TTC22,TTC22;TTC22,TTC22;TTC22	NM_001114108;NM_017904,NM_001114108;NM_017904,NM_001114108;NM_017904,NM_001114108;NM_017904,NM_001114108;NM_017904,NM_001114108;NM_017904,NM_017904;NM_001114108,NM_017904;NM_001114108,NM_017904;NM_001114108,NM_017904;NM_001114108	hyperM.iPSC
1	55044261	55044265	2	cg21872908,cg20903926	TSS200;TSS200,TSS200;TSS200	Island,Island	C1orf177;C1orf177,C1orf177;C1orf177	NM_152607;NM_001110533,NM_152607;NM_001110533	hyperM.iPSC
1	55089069	55089357	2	cg10177197,cg17475467	3'UTR,3'UTR	_,_	DHCR24,DHCR24	NM_014762,NM_014762	hyperM.iPSC
1	55218422	55218642	2	cg19638175,cg11987231	TSS1500,TSS1500	N_Shore,N_Shore	TMEM61,TMEM61	NM_182532,NM_182532	hyperM.iPSC
1	55237118	55237870	3	cg05399330,cg27058889,cg22162435	TSS200,1stExon;5'UTR,Body	S_Shore,S_Shore,S_Shelf	BSND,BSND;BSND,BSND	NM_057176,NM_057176;NM_057176,NM_057176	hyperM.iPSC
1	55277559	55277649	2	cg14993491,cg06197377	TSS1500,TSS200	N_Shore,Island	PCSK9,PCSK9	NM_174936,NM_174936	hypoM.iPSC
1	55957281	55957684	2	cg02670637,cg03108296	_,_	_,_	_,_	_,_	hyperM.iPSC
1	57861589	57861945	2	cg00026909,cg20292791	5'UTR,5'UTR	_,_	DAB1,DAB1	NM_021080,NM_021080	hyperM.iPSC
1	58486529	58487040	2	cg08164484,cg01451162	5'UTR,5'UTR	N_Shore,N_Shore	DAB1,DAB1	NM_021080,NM_021080	hyperM.iPSC
1	58671260	58671381	2	cg03513464,cg10708189	_,_	_,_	_,_	_,_	hyperM.iPSC
1	58814653	58814863	2	cg00667789,cg24851854	1stExon,1stExon	Island,Island	TACSTD2,TACSTD2	NM_002353,NM_002353	hyperM.iPSC
1	58816164	58816908	3	cg05346878,cg27398499,cg11243634	TSS1500,TSS1500,TSS1500	S_Shore,S_Shore,S_Shore	TACSTD2,TACSTD2,TACSTD2	NM_002353,NM_002353,NM_002353	hyperM.iPSC
1	59052878	59053655	6	cg17826530,cg08731696,cg02951357,cg16037711,cg15687600,cg03611060	_,_	Island,Island,N_Shore,N_Shore,Island,Island	_,_	_,_	hypoM.iPSC
1	59141744	59142542	2	cg19520452,cg16264035	_,_	N_Shore,S_Shore	_,_	_,_	hyperM.iPSC
1	60164728	60165521	2	cg13132577,cg26815229	Body,TSS1500	N_Shore,S_Shore	CYP2J2,CYP2J2	NM_000775,NM_000775	hyperM.iPSC
1	60311723	60312263	6	cg18870231,cg24740868,cg00914726,cg15628917,cg09851465,cg17238766	5'UTR,1stExon;5'UTR,1stExon;5'UTR,TSS200,TSS1500,TSS1500	N_Shore,Island,Island,S_Shore,S_Shore,S_Shore	C1orf87,C1orf87;C1orf87,C1orf87;C1orf87,C1orf87,C1orf87,C1orf87	NM_152377,NM_152377;NM_152377,NM_152377;NM_152377,NM_152377,NM_152377,NM_152377	hypoM.iPSC
1	61281848	61281916	2	cg03149128,cg27427318	_,_	Island,S_Shore	_,_	_,_	hypoM.iPSC
1	61290395	61290464	2	cg09113483,cg22877452	_,_	N_Shore,N_Shore	_,_	_,_	hypoM.iPSC
1	61292687	61292987	2	cg26013992,cg11254532	_,_	S_Shore,S_Shore	_,_	_,_	hypoM.iPSC
1	61395954	61396909	2	cg12126901,cg19899972	Body;Body;Body;Body,Body;Body;Body;Body	_,_	NFIA;NFIA;NFIA;NFIA,NFIA;NFIA;NFIA;NFIA	NM_001145512;NM_001145511;NM_001134673;NM_005595,NM_001145512;NM_001145511;NM_001134673;NM_005595	hyperM.iPSC
1	61422495	61422561	2	cg09062708,cg15575375	Body;Body;Body;Body,Body;Body;Body;Body	_,_	NFIA;NFIA;NFIA;NFIA,NFIA;NFIA;NFIA;NFIA	NM_001145512;NM_001145511;NM_001134673;NM_005595,NM_001145512;NM_001145511;NM_001134673;NM_005595	hyperM.iPSC
1	62432776	62432869	3	cg06190807,cg14850026,cg27300647	TSS1500;TSS1500,TSS1500;TSS1500,TSS200;TSS200	N_Shore,N_Shore,N_Shore	L1TD1;L1TD1,L1TD1;L1TD1,L1TD1;L1TD1	NM_019079;NM_001164835,NM_019079;NM_001164835,NM_001164835;NM_019079	hypoM.iPSC
1	63558859	63558894	2	cg18175808,cg23592947	_,_	Island,Island	_,_	_,_	hypoM.iPSC
1	63564798	63565451	3	cg25144893,cg06925855,cg01067151	_,_	S_Shore,S_Shore,N_Shelf	_,_	_,_	hypoM.iPSC
1	63567867	63568436	2	cg11953254,cg21244177	_,_	N_Shore,Island	_,_	_,_	hypoM.iPSC
1	65205330	65205948	2	cg13420662,cg07453451	TSS1500,TSS1500	S_Shore,S_Shore	JAK1,JAK1	NM_002227,NM_002227	hyperM.iPSC
1	65240585	65240605	2	cg15208832,cg00600454	_,_	N_Shore,N_Shore	_,_	_,_	hypoM.iPSC
1	65765737	65766679	2	cg16265717,cg07959978	5'UTR;5'UTR;5'UTR,5'UTR;5'UTR;5'UTR	S_Shore,S_Shelf	LEPR;LEPR;LEPR,LEPR;LEPR;LEPR	NM_001003680;NM_001003679;NM_002303,NM_001003680;NM_001003679;NM_002303	hyperM.iPSC
1	66570069	66570651	4	cg13866577,cg06115810,cg03442467,cg00805867	Body;TSS1500;Body;Body,Body;TSS200;Body;Body,Body;TSS200;Body;Body,Body;1stExon;5'UTR;Body;Body	_,_	PDE4B;PDE4B;PDE4B;PDE4B,PDE4B;PDE4B;PDE4B;PDE4B,PDE4B;PDE4B;PDE4B;PDE4B,PDE4B;PDE4B;PDE4B;PDE4B;PDE4B	NM_001037341;NM_001037339;NM_001037340;NM_002600,NM_001037341;NM_001037339;NM_001037340;NM_002600,NM_001037341;NM_001037339;NM_001037340;NM_002600,NM_001037341;NM_001037339;NM_001037339;NM_001037340;NM_002600	hyperM.iPSC
1	67039389	67039717	2	cg04979933,cg02120470	1stExon,TSS200	_,_	INSL5,INSL5	NM_005478,NM_005478	hyperM.iPSC
1	67372899	67373423	4	cg01320130,cg08029281,cg17833169,cg03340356	_,_	N_Shore,Island,Island,S_Shore	_,_	_,_	hyperM.iPSC
1	67403802	67404616	2	cg22674341,cg07842386	TSS1500,TSS200	_,_	IL23R,IL23R	NM_144701,NM_144701	hyperM.iPSC
1	67922781	67922988	3	cg23723105,cg02639608,cg01810953	TSS1500,TSS1500,TSS1500	N_Shore,N_Shore,N_Shore	GADD45A,GADD45A,GADD45A	NM_001924,NM_001924,NM_001924	hyperM.iPSC
1	68004722	68005045	2	cg11855555,cg02274788	5'UTR,5'UTR	_,_	GNG12,GNG12	NM_018841,NM_018841	hyperM.iPSC
1	68072081	68072099	2	cg25189904,cg26764244	TSS1500,TSS1500	S_Shore,S_Shore	GNG12,GNG12	NM_018841,NM_018841	hyperM.iPSC
1	68285127	68285651	2	cg03641225,cg21808053	Body,5'UTR	N_Shore,S_Shore	DIRAS3,DIRAS3	NM_004675,NM_004675	hyperM.iPSC
1	69808434	69808694	2	cg17177995,cg22076941	_,_	S_Shore,S_Shore	_,_	_,_	hypoM.iPSC
1	70944611	70944677	2	cg10239860,cg19601666	_,_	_,_	_,_	_,_	hypoM.iPSC
1	71284688	71285073	2	cg06937997,cg23823908	Body;Body;Body;Body;Body;Body;Body;Body;Body;Body,1stExon;Body;1stExon;Body;1stExon;1stExon;Body;1stExon;1stExon;1stExon	N_Shore,Island	PTGER3;PTGER3;PTGER3;PTGER3;PTGER3;PTGER3;PTGER3;PTGER3;PTGER3;PTGER3,PTGER3;PTGER3;PTGER3;PTGER3;PTGER3;PTGER3;PTGER3;PTGER3;PTGER3;PTGER3	NR_028294;NM_198715;NM_198717;NM_198714;NR_028293;NM_198718;NR_028292;NM_001126044;NM_198719;NM_198716,NM_198718;NR_028294;NM_198714;NR_028293;NM_198716;NM_198717;NR_028292;NM_001126044;NM_198719;NM_198715	hyperM.iPSC
1	74435885	74436268	4	cg11579905,cg16356856,cg13900770,cg06034096	5'UTR;TSS1500;TSS1500,5'UTR;TSS1500;TSS1500,5'UTR;TSS1500;TSS1500,1stExon;5'UTR;TSS1500;TSS1500	N_Shore,N_Shore,N_Shore,N_Shore	LRRIQ3;TNNI3K;FPGT,LRRIQ3;TNNI3K;FPGT,LRRIQ3;TNNI3K;FPGT,LRRIQ3;LRRIQ3;TNNI3K;FPGT	NM_001105659;NM_001112808;NM_003838,NM_001105659;NM_001112808;NM_003838,NM_001105659;NM_001112808;NM_003838,NM_001105659;NM_001105659;NM_001112808;NM_003838	hyperM.iPSC
1	74912334	74912546	2	cg03513964,cg03035538	TSS1500,TSS1500	_,_	C1orf173,C1orf173	NM_001002912,NM_001002912	hyperM.iPSC
1	75363071	75363941	5	cg01077724,cg02297043,cg01540595,cg01066472,cg00325531	_,_	N_Shore,Island,Island,Island,Island	_,_	_,_	hyperM.iPSC
1	75365538	75367180	11	cg01005080,cg09766820,cg00419321,cg21009965,cg01971160,cg11196437,cg01185626,cg09222749,cg10249828,cg20594809,cg01259156	TSS1500,TSS1500,TSS1500,TSS1500,TSS1500,TSS1500,TSS200,TSS200,1stExon;5'UTR,5'UTR,5'UTR	S_Shore,S_Shore,N_Shelf,N_Shelf,N_Shelf,N_Shore,N_Shore,N_Shore,N_Shore,N_Shore,N_Shore	LHX8,LHX8,LHX8,LHX8,LHX8,LHX8,LHX8,LHX8,LHX8;LHX8,LHX8,LHX8	NM_001001933,NM_001001933,NM_001001933,NM_001001933,NM_001001933,NM_001001933,NM_001001933,NM_001001933,NM_001001933;NM_001001933,NM_001001933,NM_001001933	hyperM.iPSC
1	75372120	75372255	3	cg00681106,cg06615678,cg11842415	Body,Body,Body	N_Shore,N_Shore,N_Shore	LHX8,LHX8,LHX8	NM_001001933,NM_001001933,NM_001001933	hypoM.iPSC
1	75850420	75850818	3	cg17755518,cg12659128,cg27336379	TSS1500;TSS1500,TSS1500;TSS1500,TSS1500;TSS1500	N_Shelf,N_Shelf,N_Shelf	SLC44A5;SLC44A5,SLC44A5;SLC44A5,SLC44A5;SLC44A5	NM_001130058;NM_152697,NM_001130058;NM_152697,NM_001130058;NM_152697	hyperM.iPSC
1	77003207	77003425	3	cg17826956,cg14023881,cg25199254	_,_	_,_	_,_	_,_	hyperM.iPSC
1	78728856	78730270	5	cg04410756,cg09685982,cg24022301,cg02859837,cg19403909	TSS1500;TSS1500,TSS1500;TSS1500,TSS200;TSS200,5'UTR;5'UTR,5'UTR;5'UTR	N_Shore,N_Shore,N_Shore,Island,S_Shore	PTGFR;PTGFR,PTGFR;PTGFR,PTGFR;PTGFR,PTGFR;PTGFR,PTGFR;PTGFR	NM_001039585;NM_000959,NM_001039585;NM_000959,NM_000959;NM_001039585,NM_001039585;NM_000959,NM_001039585;NM_000959	hyperM.iPSC
1	78857750	78858353	4	cg13304609,cg06872964,cg17980508,cg00855901	TSS1500,TSS1500,TSS1500,TSS1500	_,_	IFI44L,IFI44L,IFI44L,IFI44L	NM_006820,NM_006820,NM_006820,NM_006820	hyperM.iPSC
1	79244996	79245231	2	cg15084543,cg13175159	5'UTR;1stExon,TSS200	Island,S_Shore	ELTD1;ELTD1,ELTD1	NM_022159;NM_022159,NM_022159	hypoM.iPSC
1	84535926	84536520	2	cg20426713,cg11555919	TSS1500,TSS200	N_Shore,N_Shore	SAMD13,SAMD13	NM_001010971,NM_001010971	hyperM.iPSC
1	84539370	84540466	4	cg17142950,cg19869443,cg23086720,cg03204322	TSS1500;Body,TSS1500;Body,1stExon;TSS1500;5'UTR;Body,TSS1500;5'UTR;Body	S_Shore,S_Shore,S_Shelf,S_Shelf	SAMD13;SAMD13,SAMD13;SAMD13,SAMD13;SAMD13;SAMD13;SAMD13,SAMD13;SAMD13;SAMD13	NM_001134663;NM_001010971,NM_001134663;NM_001010971,NM_001134663;NM_001134664;NM_001134663;NM_001010971,NM_001134664;NM_001134663;NM_001010971	hyperM.iPSC
1	84929771	84929915	2	cg10574897,cg23238790	TSS1500;TSS1500;TSS1500;TSS1500;TSS1500,TSS1500;TSS1500;TSS1500;TSS1500;TSS1500	S_Shore,S_Shore	SSX2IP;SSX2IP;SSX2IP;SSX2IP;SSX2IP,SSX2IP;SSX2IP;SSX2IP;SSX2IP;SSX2IP	NM_014021;NM_001166295;NM_001166417;NM_001166294;NM_001166293,NM_014021;NM_001166295;NM_001166417;NM_001166294;NM_001166293	hypoM.iPSC
1	85285545	85285779	3	cg02345146,cg12037450,cg00893493	5'UTR,5'UTR,5'UTR	N_Shore,N_Shore,N_Shore	MCOLN3,MCOLN3,MCOLN3	NM_018298,NM_018298,NM_018298	hypoM.iPSC
1	85300018	85300185	3	cg09755594,cg03604763,cg12062099	TSS1500,TSS1500,TSS1500	_,_	WDR63,WDR63,WDR63	NM_145172,NM_145172,NM_145172	hyperM.iPSC
1	85496916	85497042	2	cg09385306,cg17737388	Body;Body,Body;Body	N_Shore,N_Shore	C1orf52;C1orf52,C1orf52;C1orf52	NR_024113;NM_198077,NR_024113;NM_198077	hyperM.iPSC
1	85816764	85816818	2	cg10593400,cg17108141	TSS200,TSS200	S_Shore,S_Shore	DDAH1,DDAH1	NM_001134445,NM_001134445	hypoM.iPSC
1	85854031	85854268	2	cg01040434,cg13388692	_,_	N_Shore,N_Shore	_,_	_,_	hyperM.iPSC
1	86395325	86395689	2	cg21841239,cg07198150	TSS1500,TSS1500	Island,S_Shore	COL24A1,COL24A1	NM_152890,NM_152890	hypoM.iPSC
1	86633789	86633820	2	cg20280835,cg08549810	5'UTR;5'UTR,5'UTR;5'UTR	N_Shore,N_Shore	ODF2L;ODF2L,ODF2L;ODF2L	NM_020729;NM_001007022,NM_020729;NM_001007022	hypoM.iPSC
1	86706913	86706953	2	cg22181664,cg09785991	TSS200,TSS200	_,_	CLCA1,CLCA1	NM_001285,NM_001285	hyperM.iPSC
1	86740772	86741131	2	cg10760651,cg04896168	_,_	_,_	_,_	_,_	hypoM.iPSC
1	87370061	87370132	2	cg14540297,cg25428451	Body;TSS200;Body;TSS200;TSS200,Body;TSS200;Body;TSS200;TSS200	N_Shore,Island	LOC339524;LOC339524;LOC339524;LOC339524;LOC339524,LOC339524;LOC339524;LOC339524;LOC339524;LOC339524	NR_026989;NR_026985;NR_026988;NR_026986;NR_026987,NR_026989;NR_026985;NR_026988;NR_026986;NR_026987	hyperM.iPSC
1	87389916	87390560	5	cg09121047,cg16683160,cg04246763,cg04550823,cg01516372	Body,Body,Body,Body,Body	Island,Island,Island,Island,Island	LOC339524,LOC339524,LOC339524,LOC339524,LOC339524	NR_026989,NR_026989,NR_026989,NR_026989,NR_026989	hypoM.iPSC
1	87565984	87566195	2	cg07902673,cg20633321	TSS1500,TSS1500	N_Shore,N_Shore	LMO4,LMO4	NM_006769,NM_006769	hyperM.iPSC
1	87570450	87570471	2	cg14509271,cg10436414	Body,Body	Island,Island	LMO4,LMO4	NM_006769,NM_006769	hyperM.iPSC
1	89130496	89130631	3	cg13868361,cg14010405,cg17811845	TSS1500,TSS1500,TSS1500	S_Shore,S_Shore,S_Shore	GTF2B,GTF2B,GTF2B	NM_001514,NM_001514,NM_001514	hyperM.iPSC
1	89365544	89365583	2	cg10022139,cg10199040	TSS1500,TSS1500	_,_	GBP2,GBP2	NM_004120,NM_004120	hyperM.iPSC
1	89436456	89437170	8	cg12614667,cg12058781,cg23978657,cg02482460,cg22221320,cg21365602,cg20410995,cg14563196	Body,Body,Body,Body,Body,Body,1stExon;5'UTR,1stExon;5'UTR	_,_	GBP4,GBP4,GBP4,GBP4,GBP4,GBP4,GBP4;GBP4,GBP4;GBP4	NM_052941,NM_052941,NM_052941,NM_052941,NM_052941,NM_052941,NM_052941;NM_052941,NM_052941;NM_052941	hyperM.iPSC
1	90081208	90082586	5	cg24353213,cg24720717,cg11335133,cg01860897,cg11839020	5'UTR;5'UTR,5'UTR;5'UTR,5'UTR;5'UTR,5'UTR;5'UTR,5'UTR;5'UTR	N_Shore,Island,Island,Island,S_Shore	LRRC8D;LRRC8D,LRRC8D;LRRC8D,LRRC8D;LRRC8D,LRRC8D;LRRC8D,LRRC8D;LRRC8D	NM_018103;NM_001134479,NM_018103;NM_001134479,NM_018103;NM_001134479,NM_018103;NM_001134479,NM_018103;NM_001134479	hyperM.iPSC
1	90957821	90958510	3	cg22507154,cg13361185,cg07318983	_,_	Island,S_Shore,S_Shore	_,_	_,_	hypoM.iPSC
1	90964311	90965781	9	cg02368058,cg01984304,cg16005939,cg07995570,cg03974889,cg24347994,cg14663264,cg20041088,cg13844193	_,_	Island,Island,Island,Island,Island,Island,Island,Island,S_Shore	_,_	_,_	hypoM.iPSC
1	90967924	90969076	3	cg04560225,cg04929932,cg07158747	_,_	S_Shelf,S_Shelf,S_Shelf	_,_	_,_	hypoM.iPSC
1	91074049	91074072	2	cg00644823,cg06849504	_,_	Island,Island	_,_	_,_	hypoM.iPSC
1	92122700	92123374	5	cg00342358,cg01336162,cg17074704,cg26542412,cg25204077	5'UTR,5'UTR,5'UTR,5'UTR,5'UTR	N_Shore,N_Shore,N_Shore,N_Shore,N_Shore	TGFBR3,TGFBR3,TGFBR3,TGFBR3,TGFBR3	NM_003243,NM_003243,NM_003243,NM_003243,NM_003243	hyperM.iPSC
1	92186809	92187310	5	cg19245011,cg01515515,cg06442199,cg03421440,cg14732540	TSS1500,TSS1500,TSS1500,TSS1500,TSS1500	N_Shore,N_Shore,N_Shore,N_Shore,Island	BRDT,BRDT,BRDT,BRDT,BRDT	NM_207189,NM_207189,NM_207189,NM_207189,NM_207189	hyperM.iPSC
1	92267486	92267592	2	cg11585358,cg15156367	TSS1500,TSS1500	N_Shore,N_Shore	EPHX4,EPHX4	NM_173567,NM_173567	hypoM.iPSC
1	92725243	92725485	2	cg23624705,cg04777348	TSS1500;TSS1500,TSS1500;TSS1500	S_Shore,S_Shore	GFI1;GFI1,GFI1;GFI1	NM_001127216;NM_005263,NM_001127216;NM_005263	hypoM.iPSC
1	93023772	93023806	3	cg24312719,cg17140307,cg11226183	Body,Body,Body	S_Shore,S_Shore,S_Shore	EVI5,EVI5,EVI5	NM_005665,NM_005665,NM_005665	hyperM.iPSC
1	93685276	93685390	2	cg01196158,cg01808739	TSS1500;TSS1500;TSS1500,TSS1500;TSS1500;TSS1500	N_Shore,N_Shore	FNBP1L;FNBP1L;FNBP1L,FNBP1L;FNBP1L;FNBP1L	NM_017737;NM_001164473;NM_001024948,NM_017737;NM_001164473;NM_001024948	hyperM.iPSC
1	94332302	94333676	5	cg04350215,cg09234454,cg01922613,cg18185648,cg14014879	Body,Body,Body,Body,Body	_,_	ABCA4,ABCA4,ABCA4,ABCA4,ABCA4	NM_000350,NM_000350,NM_000350,NM_000350,NM_000350	hyperM.iPSC
1	94476095	94476636	2	cg09162146,cg20335213	TSS1500,TSS1500	S_Shore,S_Shore	ARHGAP29,ARHGAP29	NM_004815,NM_004815	hypoM.iPSC
1	95057840	95058899	4	cg15571882,cg20817062,cg17599609,cg20059151	TSS1500;TSS1500,TSS1500;TSS1500,TSS1500;TSS1500,5'UTR;Body	N_Shore,N_Shore,N_Shore,Island	SLC44A3;SLC44A3,SLC44A3;SLC44A3,SLC44A3;SLC44A3,SLC44A3;SLC44A3	NM_001114106;NM_152369,NM_001114106;NM_152369,NM_001114106;NM_152369,NM_152369;NM_001114106	hypoM.iPSC
1	95157776	95158523	2	cg12725834,cg12613632	Body,Body	_,_	CNN3,CNN3	NM_001839,NM_001839	hyperM.iPSC
1	95748343	95748443	3	cg07825681,cg11584101,cg14279307	_,_	_,_	_,_	_,_	hyperM.iPSC
1	98286976	98287765	2	cg22158212,cg19236995	_,_	S_Shelf,N_Shelf	_,_	_,_	hyperM.iPSC
1	98291689	98292677	2	cg09896412,cg10202113	_,_	Island,S_Shore	_,_	_,_	hypoM.iPSC
1	98899211	98899292	2	cg11952714,cg24841257	TSS1500;TSS1500,TSS1500;TSS1500	N_Shore,N_Shore	SNX7;SNX7,SNX7;SNX7	NM_015976;NM_152238,NM_015976;NM_152238	hyperM.iPSC
1	99241911	99242222	3	cg20318156,cg26034531,cg24373253	Body;Body,Body;Body,Body;Body	N_Shore,N_Shore,N_Shore	LPPR5;LPPR5,LPPR5;LPPR5,LPPR5;LPPR5	NM_001010861;NM_001037317,NM_001010861;NM_001037317,NM_001010861;NM_001037317	hypoM.iPSC
1	99502092	99502357	3	cg15728779,cg05596294,cg18947801	TSS1500;TSS1500,TSS200;TSS200,TSS200;TSS200	N_Shore,N_Shore,N_Shore	LPPR4;LPPR4,LPPR4;LPPR4,LPPR4;LPPR4	NM_014839;NM_001166252,NM_014839;NM_001166252,NM_014839;NM_001166252	hyperM.iPSC
1	99883975	99884437	4	cg27563423,cg00729875,cg07960762,cg24603803	TSS200,1stExon;5'UTR,1stExon;5'UTR,1stExon;5'UTR	_,_	PALMD,PALMD;PALMD,PALMD;PALMD,PALMD;PALMD	NM_017734,NM_017734;NM_017734,NM_017734;NM_017734,NM_017734;NM_017734	hyperM.iPSC
1	100207800	100207846	2	cg04506601,cg06426831	TSS1500,TSS1500	N_Shore,N_Shore	SLC35A3,SLC35A3	NM_012243,NM_012243	hyperM.iPSC
1	100776222	100776276	2	cg09408571,cg06223162	TSS200,TSS200	N_Shore,N_Shore	GPR88,GPR88	NM_022049,NM_022049	hyperM.iPSC
1	100956920	100958636	3	cg04295372,cg25762679,cg27544046	TSS1500;TSS1500,1stExon;1stExon;5'UTR;5'UTR,Body;Body	_,_	VCAM1;VCAM1,VCAM1;VCAM1;VCAM1;VCAM1,VCAM1;VCAM1	NM_080682;NM_001078,NM_080682;NM_001078;NM_001078;NM_080682,NM_001078;NM_080682	hyperM.iPSC
1	106424952	106425490	4	cg11522610,cg10779492,cg06086598,cg10774181	_,_	Island,Island,Island,S_Shore	_,_	_,_	hyperM.iPSC
1	107483806	107483825	2	cg17515145,cg22516643	TSS1500;TSS1500;TSS1500,TSS1500;TSS1500;TSS1500	N_Shore,N_Shore	NTNG1;NTNG1;NTNG1,NTNG1;NTNG1;NTNG1	NM_001113226;NM_001113228;NM_014917,NM_001113226;NM_001113228;NM_014917	hypoM.iPSC
1	107824290	107825005	6	cg09940267,cg24346905,cg20016673,cg21606490,cg12211867,cg26015416	Body;Body;Body,Body;Body;Body,Body;Body;Body,Body;Body;Body,Body;Body;Body,3'UTR;3'UTR;3'UTR	N_Shore,Island,Island,Island,Island,S_Shore	NTNG1;NTNG1;NTNG1,NTNG1;NTNG1;NTNG1,NTNG1;NTNG1;NTNG1,NTNG1;NTNG1;NTNG1,NTNG1;NTNG1;NTNG1,NTNG1;NTNG1;NTNG1	NM_014917;NM_001113228;NM_001113226,NM_014917;NM_001113228;NM_001113226,NM_014917;NM_001113228;NM_001113226,NM_014917;NM_001113228;NM_001113226,NM_014917;NM_001113228;NM_001113226,NM_014917;NM_001113226;NM_001113228	hyperM.iPSC
1	109090572	109090602	3	cg09117878,cg27538385,cg11666924	TSS1500,TSS1500,TSS1500	Island,Island,Island	STXBP3,STXBP3,STXBP3	NM_007269,NM_007269,NM_007269	hyperM.iPSC
1	109386684	109386913	2	cg13908395,cg19695867	TSS1500;TSS1500;TSS1500,TSS1500;TSS1500;TSS1500	S_Shore,S_Shore	WDR47;WDR47;WDR47,WDR47;WDR47;WDR47	NM_001142550;NM_014969;NM_001142551,NM_001142550;NM_014969;NM_001142551	hyperM.iPSC
1	109456726	109457963	4	cg26523099,cg13921387,cg15077558,cg09820792	Body;TSS1500,Body;TSS1500,Body;TSS1500,TSS200;5'UTR;1stExon	N_Shore,N_Shore,N_Shore,Island	C1orf194;KIAA1324,C1orf194;KIAA1324,C1orf194;KIAA1324,KIAA1324;C1orf194;C1orf194	NM_001122961;NM_020775,NM_001122961;NM_020775,NM_001122961;NM_020775,NM_020775;NM_001122961;NM_001122961	hyperM.iPSC
1	109627826	109627940	2	cg09502502,cg18965989	TSS1500;TSS1500;TSS1500;TSS1500,TSS1500;TSS1500;TSS1500;TSS1500	S_Shore,S_Shore	PSRC1;PSRC1;PSRC1;PSRC1,PSRC1;PSRC1;PSRC1;PSRC1	NM_001032290;NM_001005290;NM_001032291;NM_032636,NM_001032290;NM_001005290;NM_001032291;NM_032636	hyperM.iPSC
1	109651228	109651377	2	cg22076757,cg08872703	TSS200,TSS200	_,_	MYBPHL,MYBPHL	NM_001010985,NM_001010985	hyperM.iPSC
1	109837193	109838094	4	cg09372525,cg12597839,cg11249215,cg12589307	TSS1500;TSS1500;TSS1500;TSS1500;TSS1500,TSS1500;TSS1500;TSS1500;TSS1500;TSS1500,TSS200;TSS200;TSS200;TSS200;TSS200,TSS200;TSS200;TSS200;TSS200;TSS200	N_Shore,N_Shore,Island,Island	CYB561D1;CYB561D1;CYB561D1;CYB561D1;CYB561D1,CYB561D1;CYB561D1;CYB561D1;CYB561D1;CYB561D1,CYB561D1;CYB561D1;CYB561D1;CYB561D1;CYB561D1,CYB561D1;CYB561D1;CYB561D1;CYB561D1;CYB561D1	NM_001134403;NM_182580;NM_001134402;NM_001134400;NM_001134404,NM_001134403;NM_182580;NM_001134402;NM_001134400;NM_001134404,NM_001134404;NM_001134402;NM_001134400;NM_001134403;NM_182580,NM_001134404;NM_001134402;NM_001134400;NM_001134403;NM_182580	hyperM.iPSC
1	109844051	109844439	2	cg24897320,cg16253157	3'UTR;3'UTR;3'UTR;3'UTR;3'UTR,3'UTR;3'UTR;3'UTR;3'UTR;3'UTR	_,_	CYB561D1;CYB561D1;CYB561D1;CYB561D1;CYB561D1,CYB561D1;CYB561D1;CYB561D1;CYB561D1;CYB561D1	NM_182580;NM_001134402;NM_001134404;NM_001134403;NM_001134400,NM_182580;NM_001134402;NM_001134404;NM_001134403;NM_001134400	hypoM.iPSC
1	109883084	109884447	3	cg10114625,cg26155492,cg23749046	TSS1500,TSS200,5'UTR	_,_	GPR61,GPR61,GPR61	NM_031936,NM_031936,NM_031936	hyperM.iPSC
1	109968086	109968187	3	cg16140253,cg20253872,cg27565899	Body;Body;TSS1500,Body;Body;TSS1500,Body;Body;TSS1500	S_Shelf,S_Shelf,S_Shelf	AMPD2;AMPD2;AMPD2,AMPD2;AMPD2;AMPD2,AMPD2;AMPD2;AMPD2	NM_139156;NM_004037;NM_203404,NM_139156;NM_004037;NM_203404,NM_139156;NM_004037;NM_203404	hyperM.iPSC
1	109987528	109987567	3	cg18533397,cg00924017,cg22221025	_,_	Island,Island,Island	_,_	_,_	hypoM.iPSC
1	109999763	110000649	2	cg21451998,cg22247664	TSS1500;TSS1500;TSS1500,Body;Body;Body	N_Shore,Island	GSTM4;GSTM4;GSTM4,GSTM4;GSTM4;GSTM4	NM_147148;NM_000850;NR_024538,NR_024538;NM_147148;NM_000850	hyperM.iPSC
1	110011788	110012546	2	cg12647497,cg06615940	TSS1500;TSS1500,Body;Body	N_Shore,S_Shore	GSTM2;GSTM2,GSTM2;GSTM2	NM_000848;NM_001142368,NM_000848;NM_001142368	hyperM.iPSC
1	110055500	110056419	2	cg13464436,cg14377951	TSS1500,1stExon;5'UTR	_,_	GSTM5,GSTM5;GSTM5	NM_000851,NM_000851;NM_000851	hyperM.iPSC
1	110109334	110109435	2	cg06281016,cg17875320	TSS1500;TSS1500;TSS1500,TSS1500;TSS1500;TSS1500	_,_	EPS8L3;EPS8L3;EPS8L3,EPS8L3;EPS8L3;EPS8L3	NM_024526;NM_139053;NM_133181,NM_024526;NM_139053;NM_133181	hyperM.iPSC
1	110327714	110328635	3	cg24681307,cg02152578,cg02085805	TSS1500,TSS1500,TSS200	N_Shore,N_Shore,N_Shore	AHCYL1,AHCYL1,AHCYL1	NM_006621,NM_006621,NM_006621	hyperM.iPSC
1	110411496	110413997	8	cg04975966,cg01572884,cg13803688,cg00484358,cg23871640,cg06809252,cg02011351,cg19092096	Body,Body,Body,Body,Body,Body,Body,Body	N_Shore,Island,Island,Island,Island,Island,Island,Island	ALX3,ALX3,ALX3,ALX3,ALX3,ALX3,ALX3,ALX3	NM_006492,NM_006492,NM_006492,NM_006492,NM_006492,NM_006492,NM_006492,NM_006492	hypoM.iPSC
1	110415119	110415456	2	cg16127759,cg08719081	TSS1500,TSS1500	S_Shore,S_Shore	ALX3,ALX3	NM_006492,NM_006492	hypoM.iPSC
1	110474292	110475638	5	cg27432826,cg02103924,cg25207248,cg04043150,cg20510164	_,_	N_Shore,Island,Island,Island,S_Shore	_,_	_,_	hyperM.iPSC
1	110495786	110496270	2	cg15374686,cg05783233	5'UTR,5'UTR	Island,S_Shore	SLC6A17,SLC6A17	NM_001010898,NM_001010898	hyperM.iPSC
1	110536147	110536635	2	cg04208466,cg12072789	Body,Body	_,_	SLC6A17,SLC6A17	NM_001010898,NM_001010898	hyperM.iPSC
1	110553570	110553830	3	cg20966270,cg02193146,cg21217540	_,_	N_Shore,Island,Island	_,_	_,_	hypoM.iPSC
1	110735290	110735850	3	cg00961640,cg17749509,cg03535830	TSS200,TSS1500,TSS1500	_,_	SLC16A4,SLC16A4,SLC16A4	NM_004696,NM_004696,NM_004696	hyperM.iPSC
1	110752294	110752426	2	cg20982476,cg10322499	TSS1500,TSS1500	S_Shore,S_Shore	HBXIP,HBXIP	NM_006402,NM_006402	hyperM.iPSC
1	110795047	110795305	2	cg18434152,cg08535756	TSS1500,TSS200	_,_	PROK1,PROK1	NM_032414,NM_032414	hyperM.iPSC
1	110863352	110863650	3	cg12957986,cg04299028,cg12604192	TSS200,TSS200,TSS1500	_,_	KCNA10,KCNA10,KCNA10	NM_005549,NM_005549,NM_005549	hyperM.iPSC
1	111019602	111019810	3	cg07903677,cg00995520,cg07421287	TSS1500,TSS1500,TSS1500	S_Shore,S_Shore,S_Shore	KCNA3,KCNA3,KCNA3	NM_002232,NM_002232,NM_002232	hypoM.iPSC
1	111215166	111217304	5	cg16896205,cg07314983,cg10105218,cg10516886,cg03043417	TSS200,TSS1500;5'UTR,TSS1500;5'UTR,TSS1500;5'UTR,1stExon;5'UTR;5'UTR	_,_	CD53,CD53;CD53,CD53;CD53,CD53;CD53,CD53;CD53;CD53	NM_001040033,NM_000560;NM_001040033,NM_000560;NM_001040033,NM_000560;NM_001040033,NM_000560;NM_001040033;NM_000560	hyperM.iPSC
1	111307544	111308527	14	cg02838118,cg08541521,cg06035702,cg18248911,cg04577625,cg15139482,cg02638057,cg23658744,cg01011619,cg09319202,cg09025040,cg19641455,cg16524830,cg15566506	Body;5'UTR,Body;5'UTR,Body;5'UTR,1stExon;5'UTR;1stExon,1stExon;5'UTR;5'UTR;1stExon,1stExon;5'UTR;5'UTR;1stExon,TSS200;TSS200,TSS200;TSS200,TSS200;TSS200,TSS200;TSS200,TSS1500;TSS1500,TSS1500;TSS1500,TSS1500;TSS1500,TSS1500;TSS1500	Island,Island,Island,Island,Island,Island,Island,Island,Island,Island,Island,Island,Island,Island	C1orf103;C1orf103,C1orf103;C1orf103,C1orf103;C1orf103,C1orf103;C1orf103;C1orf103,C1orf103;C1orf103;C1orf103;C1orf103,C1orf103;C1orf103;C1orf103;C1orf103,C1orf103;C1orf103,C1orf103;C1orf103,C1orf103;C1orf103,C1orf103;C1orf103,C1orf103;C1orf103,C1orf103;C1orf103,C1orf103;C1orf103,C1orf103;C1orf103	NM_018372;NM_001006945,NM_018372;NM_001006945,NM_018372;NM_001006945,NM_001006945;NM_001006945;NM_018372,NM_001006945;NM_018372;NM_001006945;NM_018372,NM_001006945;NM_018372;NM_001006945;NM_018372,NM_001006945;NM_018372,NM_001006945;NM_018372,NM_001006945;NM_018372,NM_001006945;NM_018372,NM_018372;NM_001006945,NM_018372;NM_001006945,NM_018372;NM_001006945,NM_018372;NM_001006945	hyperM.iPSC
1	111485324	111485483	2	cg16164356,cg27234129	TSS1500;5'UTR;5'UTR,TSS1500;5'UTR;5'UTR	S_Shore,S_Shore	DRAM2;CEPT1;CEPT1,DRAM2;CEPT1;CEPT1	NM_178454;NM_006090;NM_001007794,NM_178454;NM_006090;NM_001007794	hyperM.iPSC
1	111571797	111571814	2	cg26366091,cg10045881	TSS200;TSS200,1stExon;5'UTR;5'UTR;1stExon	_,_	CHI3L2;CHI3L2,CHI3L2;CHI3L2;CHI3L2;CHI3L2	NM_001025197;NM_004000,NM_001025197;NM_004000;NM_001025197;NM_004000	hyperM.iPSC
1	111623566	111623591	2	cg21527708,cg09333723	TSS1500,TSS1500	_,_	LOC149620,LOC149620	NR_003928,NR_003928	hyperM.iPSC
1	111633632	111633790	2	cg08129490,cg17143643	TSS1500;TSS1500,TSS1500;TSS1500	_,_	CHIA;CHIA,CHIA;CHIA	NM_021797;NM_201653,NM_021797;NM_201653	hyperM.iPSC
1	111771388	111772054	3	cg18945039,cg17798659,cg09558502	Body,Body,TSS200	_,_	OVGP1,OVGP1,OVGP1	NM_002557,NM_002557,NM_002557	hyperM.iPSC
1	111859759	111860273	4	cg08256939,cg07314829,cg14669379,cg00543976	Body,Body,Body,Body	Island,Island,Island,S_Shore	ADORA3,ADORA3,ADORA3,ADORA3	NM_001081976,NM_001081976,NM_001081976,NM_001081976	hyperM.iPSC
1	112329063	112329684	2	cg22040158,cg17898124	5'UTR;5'UTR,5'UTR;5'UTR	S_Shelf,N_Shelf	KCND3;KCND3,KCND3;KCND3	NM_172198;NM_004980,NM_172198;NM_004980	hyperM.iPSC
1	113017905	113018352	4	cg03417473,cg10114555,cg11178985,cg05306395	TSS1500;TSS1500,TSS1500;TSS1500,TSS1500;TSS1500,TSS1500;TSS1500	N_Shore,N_Shore,N_Shore,N_Shore	MOV10;MOV10,MOV10;MOV10,MOV10;MOV10,MOV10;MOV10	NM_001130079;NM_020963,NM_001130079;NM_020963,NM_001130079;NM_020963,NM_001130079;NM_020963	hyperM.iPSC
1	113063234	113063287	3	cg16716189,cg26190476,cg23746359	TSS1500;TSS1500,TSS1500;TSS1500,TSS1500;TSS1500	Island,Island,Island	FAM19A3;FAM19A3,FAM19A3;FAM19A3,FAM19A3;FAM19A3	NM_001004440;NM_182759,NM_001004440;NM_182759,NM_001004440;NM_182759	hyperM.iPSC
1	113091538	113092488	2	cg05127077,cg04895202	_,_	S_Shelf,S_Shelf	_,_	_,_	hyperM.iPSC
1	113194140	113194304	2	cg21883115,cg13966710	_,_	Island,Island	_,_	_,_	hyperM.iPSC
1	114215835	114215931	2	cg00916635,cg00041401	5'UTR;1stExon;5'UTR;1stExon,TSS200;TSS200	_,_	PTPN22;PTPN22;PTPN22;PTPN22,PTPN22;PTPN22	NM_012411;NM_012411;NM_015967;NM_015967,NM_012411;NM_015967	hyperM.iPSC
1	114323967	114324193	2	cg26824174,cg17253459	Body,Body	_,_	OLFML3,OLFML3	NM_020190,NM_020190	hyperM.iPSC
1	114495713	114496289	2	cg23443003,cg01974027	5'UTR,5'UTR	N_Shore,N_Shore	SYT6,SYT6	NM_205848,NM_205848	hypoM.iPSC
1	114498164	114499971	9	cg21920775,cg01567634,cg03514545,cg19901801,cg12097117,cg06620092,cg00764109,cg12728020,cg13931292	TSS200,TSS200,TSS1500,TSS1500,TSS1500,TSS1500,TSS1500,_	Island,Island,N_Shore,Island,S_Shore,S_Shore,S_Shore,S_Shore,S_Shore	SYT6,SYT6,SYT6,SYT6,SYT6,SYT6,SYT6,_	NM_205848,NM_205848,NM_205848,NM_205848,NM_205848,NM_205848,NM_205848,_	hyperM.iPSC
1	115039736	115040017	2	cg05499890,cg23523368	TSS200,TSS1500	_,_	AMPD1,AMPD1	NM_000036,NM_000036	hyperM.iPSC
1	115198972	115199646	6	cg04115969,cg18087477,cg27332337,cg10440578,cg18396987,cg12813768	TSS200,1stExon;5'UTR,1stExon;5'UTR,5'UTR,5'UTR,Body	Island,Island,Island,Island,S_Shore,S_Shore	SYCP1,SYCP1;SYCP1,SYCP1;SYCP1,SYCP1,SYCP1,SYCP1	NM_003176,NM_003176;NM_003176,NM_003176;NM_003176,NM_003176,NM_003176,NM_003176	hyperM.iPSC
1	115623856	115624494	2	ch.1.2707897R,cg13174306	_,_	_,_	_,_	_,_	hyperM.iPSC
1	115682653	115683067	5	cg03962691,cg22354782,cg21184174,cg25067242,cg02987481	TSS1500,TSS1500,TSS1500,TSS1500,TSS1500	Island,Island,Island,Island,S_Shore	NGF,NGF,NGF,NGF,NGF	NM_002506,NM_002506,NM_002506,NM_002506,NM_002506	hypoM.iPSC
1	115823448	115823614	2	cg07790079,cg03324464	_,_	_,_	_,_	_,_	hyperM.iPSC
1	116112235	116112864	2	cg05190718,cg18942631	Body,5'UTR;1stExon	_,_	CASQ2,CASQ2;CASQ2	NM_001232,NM_001232;NM_001232	hyperM.iPSC
1	116184507	116185157	3	cg17873750,cg23202177,cg02030187	5'UTR;1stExon;5'UTR,5'UTR;1stExon;5'UTR,1stExon;TSS1500;5'UTR	S_Shore,S_Shore,S_Shore	NHLH2;NHLH2;NHLH2,NHLH2;NHLH2;NHLH2,NHLH2;NHLH2;NHLH2	NM_001111061;NM_001111061;NM_005599,NM_001111061;NM_001111061;NM_005599,NM_005599;NM_001111061;NM_005599	hyperM.iPSC
1	116511750	116512129	3	cg02452639,cg00969087,cg10376286	_,_	Island,Island,N_Shore	_,_	_,_	hypoM.iPSC
1	116762421	116763195	2	cg05565562,cg21268653	Body;Body;Body;Body;Body,TSS1500;TSS1500;TSS1500;TSS1500;TSS1500	N_Shore,S_Shore	C1orf203;C1orf203;C1orf203;C1orf203;C1orf203,C1orf203;C1orf203;C1orf203;C1orf203;C1orf203	NR_024126;NR_027646;NR_024124;NR_024125;NR_027645,NR_027645;NR_024126;NR_024124;NR_027646;NR_024125	hyperM.iPSC
1	117014905	117015686	3	cg05156532,cg04390865,cg18274788	TSS1500,TSS1500,TSS1500	S_Shelf,S_Shelf,S_Shelf	MIR320B1,MIR320B1,MIR320B1	NR_031564,NR_031564,NR_031564	hyperM.iPSC
1	117437073	117437344	2	cg10488685,cg09099500	Body,TSS1500;Body	_,_	TTF2,MIR942;TTF2	NM_003594,NR_030640;NM_003594	hyperM.iPSC
1	117554836	117555488	3	cg22424746,cg24006253,cg27446185	Body,TSS200,TSS1500	_,_	VTCN1,VTCN1,VTCN1	NM_024626,NM_024626,NM_024626	hyperM.iPSC
1	117967247	117967640	2	cg04720592,cg21419585	Body,Body	_,_	FAM46C,FAM46C	NM_017709,NM_017709	hyperM.iPSC
1	119337216	119337811	3	cg17326555,cg24035245,cg17436134	_,_	Island,Island,S_Shore	_,_	_,_	hypoM.iPSC
1	119350050	119352007	7	cg15724945,cg01959730,cg09232478,cg10572355,cg22002034,cg25771271,cg13933734	_,_	N_Shore,N_Shore,N_Shore,Island,Island,Island,Island	_,_	_,_	hypoM.iPSC
1	119712523	119713003	2	cg08055612,cg03762535	TSS1500;TSS1500,5'UTR;1stExon;5'UTR;1stExon	_,_	HAO2;HAO2,HAO2;HAO2;HAO2;HAO2	NM_016527;NM_001005783,NM_001005783;NM_016527;NM_016527;NM_001005783	hyperM.iPSC
1	119758903	119759564	2	cg20414217,cg09371351	TSS1500;TSS200,5'UTR;5'UTR	_,_	HSD3B2;HSD3B2,HSD3B2;HSD3B2	NM_000198;NM_001166120,NM_001166120;NM_000198	hyperM.iPSC
1	119975512	119976093	4	cg25216580,cg19496978,cg03601828,cg06814792	5'UTR,5'UTR,5'UTR,5'UTR	_,_	ZNF697,ZNF697,ZNF697,ZNF697	NM_001080470,NM_001080470,NM_001080470,NM_001080470	hyperM.iPSC
1	120240448	120240559	2	cg23131777,cg16166968	1stExon,1stExon;5'UTR	N_Shore,Island	ADAM30,ADAM30;ADAM30	NM_021794,NM_021794;NM_021794	hyperM.iPSC
1	120706686	120706845	3	cg22123542,cg25137968,cg04080517	TSS1500,TSS1500,TSS1500	N_Shore,N_Shore,N_Shore	HIST2H2BA,HIST2H2BA,HIST2H2BA	NR_027337,NR_027337,NR_027337	hyperM.iPSC
1	143641929	143642321	2	cg21608225,cg02854922	Body;Body;Body,1stExon;Body;Body	N_Shore,N_Shore	PDE4DIP;PDE4DIP;PDE4DIP,PDE4DIP;PDE4DIP;PDE4DIP	NM_001002811;NM_001002812;NM_014644,NM_001002811;NM_001002812;NM_014644	hyperM.iPSC
1	144300891	144301286	2	cg00394712,cg16928044	TSS200,TSS1500	Island,S_Shore	NUDT17,NUDT17	NM_001012758,NM_001012758	hyperM.iPSC
1	144425367	144425500	2	cg06095777,cg25221984	5'UTR,5'UTR	Island,Island	CD160,CD160	NM_007053,NM_007053	hyperM.iPSC
1	145116394	145116475	3	cg12136274,cg05774978,cg24947451	Body,Body,Body	Island,Island,Island	PDIA3P,PDIA3P,PDIA3P	NR_002305,NR_002305,NR_002305	hyperM.iPSC
1	145180540	145180740	4	cg07572770,cg21917976,cg11983977,cg24197750	TSS1500,TSS1500,TSS1500,TSS200	N_Shore,N_Shore,N_Shore,Island	CHD1L,CHD1L,CHD1L,CHD1L	NM_004284,NM_004284,NM_004284,NM_004284	hyperM.iPSC
1	145696833	145699232	4	cg06124285,cg08894131,cg26558992,cg07975634	3'UTR;3'UTR,Body;Body,5'UTR;5'UTR,1stExon;5'UTR;5'UTR	_,_	GJA5;GJA5,GJA5;GJA5,GJA5;GJA5,GJA5;GJA5;GJA5	NM_005266;NM_181703,NM_181703;NM_005266,NM_181703;NM_005266,NM_181703;NM_181703;NM_005266	hyperM.iPSC
1	145711792	145712250	3	cg02173484,cg08307963,cg26191449	5'UTR,TSS200,TSS200	_,_	GJA5,GJA5,GJA5	NM_005266,NM_005266,NM_005266	hyperM.iPSC
1	145841213	145841591	3	cg16574962,cg11385094,cg16023912	TSS1500,TSS200,5'UTR;1stExon	_,_	GJA8,GJA8,GJA8;GJA8	NM_005267,NM_005267,NM_005267;NM_005267	hyperM.iPSC
1	146256104	146256371	2	cg17149103,cg00171578	_,_	N_Shore,Island	_,_	_,_	hypoM.iPSC
1	146267649	146268413	5	cg15829969,cg03951833,cg02451774,cg04869838,cg25001930	_,_	_,_	_,_	_,_	hyperM.iPSC
1	147404132	147405075	2	cg20768669,cg21273659	_,_	N_Shore,S_Shore	_,_	_,_	hyperM.iPSC
1	147410785	147411706	2	cg02393684,cg16661522	_,_	N_Shelf,N_Shore	_,_	_,_	hyperM.iPSC
1	147429054	147429142	3	cg23106045,cg09139923,cg21937395	_,_	Island,Island,Island	_,_	_,_	hyperM.iPSC
1	147436597	147436976	4	cg01062913,cg13787167,cg19775250,cg11981932	_,_	_,_	_,_	_,_	hyperM.iPSC
1	147453015	147453701	3	cg22700790,cg21404935,cg14530833	_,_	_,_	_,_	_,_	hyperM.iPSC
1	147499587	147500123	4	cg11333681,cg05783727,cg14530937,cg16021903	_,_	S_Shore,S_Shore,S_Shelf,S_Shelf	_,_	_,_	hyperM.iPSC
1	147665798	147666976	4	cg13962321,cg14497172,cg16519842,cg24437737	1stExon,TSS1500,TSS1500,TSS1500	Island,N_Shore,Island,Island	HIST2H2BF,HIST2H2BF,HIST2H2BF,HIST2H2BF	NM_001024599,NM_001024599,NM_001024599,NM_001024599	hyperM.iPSC
1	148051195	148051835	3	cg12769994,cg23782591,cg08636083	TSS1500;TSS1500,TSS1500;TSS1500,TSS1500;1stExon;TSS1500	N_Shore,Island,Island	HIST2H2BF;HIST2H2BF,HIST2H2BF;HIST2H2BF,HIST2H2BF;HIST2H3D;HIST2H2BF	NM_001024599;NM_001161334,NM_001024599;NM_001161334,NM_001024599;NM_001123375;NM_001161334	hyperM.iPSC
1	148138249	148138282	2	cg27541317,cg24364827	Body,Body	Island,Island	BOLA1,BOLA1	NM_016074,NM_016074	hyperM.iPSC
1	148174709	148174937	3	cg05750047,cg00339782,cg13476072	Body;5'UTR;1stExon,Body;5'UTR;1stExon,Body;TSS200	_,_	MTMR11;MTMR11;MTMR11,MTMR11;MTMR11;MTMR11,MTMR11;MTMR11	NM_001145862;NM_181873;NM_181873,NM_001145862;NM_181873;NM_181873,NM_001145862;NM_181873	hyperM.iPSC
1	148496067	148496857	3	cg20791007,cg03969696,cg05037389	TSS1500,TSS1500,1stExon;5'UTR	_,_	CA14,CA14,CA14;CA14	NM_012113,NM_012113,NM_012113;NM_012113	hypoM.iPSC
1	148747158	148747480	3	cg03818307,cg01076495,cg16386293	1stExon;1stExon;5'UTR;5'UTR,1stExon;1stExon;5'UTR;5'UTR,Body;Body	_,_	ECM1;ECM1;ECM1;ECM1,ECM1;ECM1;ECM1;ECM1,ECM1;ECM1	NM_004425;NM_022664;NM_004425;NM_022664,NM_004425;NM_022664;NM_004425;NM_022664,NM_004425;NM_022664	hyperM.iPSC
1	148787814	148787865	3	cg09622957,cg04863713,cg09229181	TSS1500;TSS1500,TSS1500;TSS1500,TSS1500;TSS1500	N_Shore,N_Shore,N_Shore	ADAMTSL4;ADAMTSL4,ADAMTSL4;ADAMTSL4,ADAMTSL4;ADAMTSL4	NM_019032;NM_025008,NM_019032;NM_025008,NM_019032;NM_025008	hyperM.iPSC
1	148819161	148819441	2	cg02961109,cg17724175	TSS1500;TSS1500,TSS1500;TSS1500	S_Shore,S_Shore	MCL1;MCL1,MCL1;MCL1	NM_021960;NM_182763,NM_021960;NM_182763	hyperM.iPSC
1	149004386	149004797	2	cg18892169,cg08578023	5'UTR,5'UTR;1stExon	_,_	CTSS,CTSS;CTSS	NM_004079,NM_004079;NM_004079	hyperM.iPSC
1	149047308	149047342	2	cg20802392,cg20817941	5'UTR,1stExon;5'UTR	_,_	CTSK,CTSK;CTSK	NM_000396,NM_000396;NM_000396	hyperM.iPSC
1	149048425	149048927	2	cg26574794,cg13201342	TSS1500,3'UTR;3'UTR;3'UTR;TSS1500	_,_	CTSK,ARNT;ARNT;ARNT;CTSK	NM_000396,NM_178427;NM_178426;NM_001668;NM_000396	hyperM.iPSC
1	149212485	149212647	2	cg07422880,cg26058502	5'UTR;5'UTR,5'UTR;5'UTR	N_Shore,N_Shore	LASS2;LASS2,LASS2;LASS2	NM_022075;NM_181746,NM_022075;NM_181746	hyperM.iPSC
1	149220304	149220567	3	cg25468058,cg04144222,cg07337598	TSS1500,TSS1500,TSS1500	_,_	ANXA9,ANXA9,ANXA9	NM_003568,NM_003568,NM_003568	hypoM.iPSC
1	149245009	149245716	4	cg18182216,cg07495664,cg01016521,cg06433658	5'UTR;5'UTR;Body;5'UTR;5'UTR,5'UTR;1stExon;5'UTR;5'UTR;5'UTR;5'UTR;1stExon;1stExon,5'UTR;1stExon;5'UTR;5'UTR;5'UTR;5'UTR;1stExon;1stExon,5'UTR;1stExon;5'UTR;5'UTR;5'UTR;5'UTR;1stExon;1stExon	N_Shelf,N_Shore,N_Shore,N_Shore	FAM63A;FAM63A;FAM63A;FAM63A;FAM63A,FAM63A;FAM63A;FAM63A;FAM63A;FAM63A;FAM63A;FAM63A;FAM63A,FAM63A;FAM63A;FAM63A;FAM63A;FAM63A;FAM63A;FAM63A;FAM63A,FAM63A;FAM63A;FAM63A;FAM63A;FAM63A;FAM63A;FAM63A;FAM63A	NM_018379;NM_001163259;NM_001163258;NM_001163260;NM_001040217,NM_001040217;NM_001163260;NM_018379;NM_001163260;NM_001163259;NM_001163258;NM_001040217;NM_001163259,NM_001040217;NM_001163260;NM_018379;NM_001163260;NM_001163259;NM_001163258;NM_001040217;NM_001163259,NM_001040217;NM_001163260;NM_018379;NM_001163260;NM_001163259;NM_001163258;NM_001040217;NM_001163259	hyperM.iPSC
1	149247008	149247035	2	cg21147147,cg09028383	5'UTR;TSS1500;5'UTR;TSS1500;TSS1500;TSS1500,5'UTR;TSS1500;5'UTR;TSS1500;TSS1500;TSS1500	N_Shore,N_Shore	FAM63A;PRUNE;FAM63A;FAM63A;FAM63A;FAM63A,FAM63A;PRUNE;FAM63A;FAM63A;FAM63A;FAM63A	NM_018379;NM_021222;NM_001163258;NM_001040217;NM_001163260;NM_001163259,NM_018379;NM_021222;NM_001163258;NM_001040217;NM_001163260;NM_001163259	hyperM.iPSC
1	149309367	149309447	2	cg14860219,cg13232357	TSS1500,TSS1500	N_Shore,N_Shore	GABPB2,GABPB2	NM_144618,NM_144618	hyperM.iPSC
1	149395686	149395784	2	cg16565154,cg21544402	TSS200,1stExon;5'UTR	_,_	TNFAIP8L2,TNFAIP8L2;TNFAIP8L2	NM_024575,NM_024575;NM_024575	hyperM.iPSC
1	149403898	149404243	2	cg24262376,cg11205312	TSS1500;Body;Body,TSS1500;Body;1stExon	_,_	SCNM1;LYSMD1;LYSMD1,SCNM1;LYSMD1;LYSMD1	NM_024041;NM_212551;NM_001136543,NM_024041;NM_001136543;NM_212551	hyperM.iPSC
1	149415120	149415313	2	cg05163509,cg10973881	5'UTR;1stExon,TSS200	_,_	TMOD4;TMOD4,TMOD4	NM_013353;NM_013353,NM_013353	hyperM.iPSC
1	149493559	149493565	2	cg10963543,cg08236358	TSS1500,TSS1500	_,_	PSMD4,PSMD4	NM_002810,NM_002810	hyperM.iPSC
1	149522366	149522595	2	cg01435515,cg02290168	5'UTR,5'UTR	Island,S_Shore	ZNF687,ZNF687	NM_020832,NM_020832	hyperM.iPSC
1	149565323	149565578	2	cg08456334,cg01974375	1stExon;5'UTR,TSS1500	N_Shore,N_Shore	PI4KB;PI4KB,PI4KB	NM_002651;NM_002651,NM_002651	hyperM.iPSC
1	149567347	149567492	2	cg02145668,cg27529647	_,_	Island,S_Shore	_,_	_,_	hyperM.iPSC
1	149610464	149611430	2	cg06760144,cg18515587	Body,Body	_,_	SELENBP1,SELENBP1	NM_003944,NM_003944	hyperM.iPSC
1	149637269	149637933	2	cg04396915,cg23106844	TSS1500,TSS1500	N_Shore,N_Shore	PSMB4,PSMB4	NM_002796,NM_002796	hyperM.iPSC
1	149776347	149776449	2	cg25198049,cg07596668	Body,3'UTR	N_Shelf,N_Shelf	CGN,CGN	NM_020770,NM_020770	hyperM.iPSC
1	149780060	149780126	3	cg07599225,cg20294789,cg27577972	Body;Body,Body;Body,Body;Body	S_Shore,S_Shore,S_Shore	TUFT1;TUFT1,TUFT1;TUFT1,TUFT1;TUFT1	NM_001126337;NM_020127,NM_001126337;NM_020127,NM_001126337;NM_020127	hypoM.iPSC
1	149959823	149960944	5	cg09820519,cg24158160,cg16096311,cg02959609,cg11690979	TSS1500,TSS1500,TSS1500,TSS1500,Body	N_Shore,N_Shore,N_Shore,N_Shore,S_Shore	C1orf230,C1orf230,C1orf230,C1orf230,C1orf230	NM_001144956,NM_001144956,NM_001144956,NM_001144956,NM_001144956	hyperM.iPSC
1	150044398	150045281	3	cg13201297,cg13563504,cg24545100	1stExon;5'UTR,TSS1500,TSS1500;3'UTR;3'UTR	_,_	LINGO4;LINGO4,LINGO4,LINGO4;RORC;RORC	NM_001004432;NM_001004432,NM_001004432,NM_001004432;NM_001001523;NM_005060	hyperM.iPSC
1	150092598	150092829	3	cg01062247,cg11344950,cg26292918	1stExon,1stExon;5'UTR,TSS200	_,_	THEM5,THEM5;THEM5,THEM5	NM_182578,NM_182578;NM_182578,NM_182578	hyperM.iPSC
1	150428021	150428649	4	cg23107878,cg26320663,cg02754945,cg21280320	_,_	Island,Island,Island,S_Shore	_,_	_,_	hyperM.iPSC
1	150753959	150754992	9	cg12588301,cg15700437,cg03606772,cg00302521,cg23726537,cg09873164,cg03352287,cg01864564,cg22723818	5'UTR,5'UTR,5'UTR,Body,Body,Body,3'UTR,3'UTR,3'UTR	N_Shore,N_Shore,N_Shore,N_Shore,Island,Island,Island,Island,S_Shore	CRCT1,CRCT1,CRCT1,CRCT1,CRCT1,CRCT1,CRCT1,CRCT1,CRCT1	NM_019060,NM_019060,NM_019060,NM_019060,NM_019060,NM_019060,NM_019060,NM_019060,NM_019060	hyperM.iPSC
1	150805004	150805512	3	cg23724738,cg24000437,cg23110514	3'UTR,5'UTR,5'UTR	_,_	LCE3E,LCE3E,LCE3E	NM_178435,NM_178435,NM_178435	hyperM.iPSC
1	150819720	150819868	2	cg02054568,cg18116418	TSS200,TSS1500	_,_	LCE3D,LCE3D	NM_032563,NM_032563	hyperM.iPSC
1	150861946	150862616	5	cg26135325,cg27206522,cg26466858,cg13071333,cg09895009	1stExon,TSS200,TSS1500,TSS1500,TSS1500	_,_	LCE3A,LCE3A,LCE3A,LCE3A,LCE3A	NM_178431,NM_178431,NM_178431,NM_178431,NM_178431	hyperM.iPSC
1	150924574	150924911	2	cg08279693,cg24332770	TSS1500,TSS1500	_,_	LCE2B,LCE2B	NM_014357,NM_014357	hyperM.iPSC
1	150936609	150937222	2	cg22616525,cg13974761	TSS1500,TSS1500	_,_	LCE2A,LCE2A	NM_178428,NM_178428	hyperM.iPSC
1	150947263	150947467	2	cg20823091,cg21846488	TSS1500,TSS1500	_,_	LCE4A,LCE4A	NM_178356,NM_178356	hyperM.iPSC
1	151014096	151014125	2	cg23413307,cg26302157	TSS1500,TSS1500	_,_	LCE1F,LCE1F	NM_178354,NM_178354	hyperM.iPSC
1	151035100	151035351	2	cg22365757,cg12725323	TSS1500,TSS1500	_,_	LCE1D,LCE1D	NM_178352,NM_178352	hyperM.iPSC
1	151148439	151149044	2	cg15486123,cg02855850	5'UTR,Body	_,_	IVL,IVL	NM_005547,NM_005547	hyperM.iPSC
1	151222167	151224003	4	cg06101324,cg04505023,cg27569034,cg07909128	TSS1500,TSS1500,5'UTR,5'UTR	_,_	SPRR1A,SPRR1A,SPRR1A,SPRR1A	NM_005987,NM_005987,NM_005987,NM_005987	hyperM.iPSC
1	151240344	151241395	3	cg24667326,cg04138756,cg21543102	TSS1500;TSS1500,TSS1500;TSS1500,5'UTR;5'UTR	_,_	SPRR3;SPRR3,SPRR3;SPRR3,SPRR3;SPRR3	NM_001097589;NM_005416,NM_001097589;NM_005416,NM_001097589;NM_005416	hyperM.iPSC
1	151280454	151281905	3	cg14826683,cg10812889,cg12891678	TSS1500,TSS1500,_	_,_	SPRR2D,SPRR2D,_	NM_006945,NM_006945,_	hyperM.iPSC
1	151297138	151297375	3	cg04993112,cg09169531,cg26059632	TSS1500,TSS1500,TSS1500	_,_	SPRR2A,SPRR2A,SPRR2A	NM_005988,NM_005988,NM_005988	hyperM.iPSC
1	151352273	151352622	2	cg03449150,cg22204954	5'UTR,TSS200	_,_	SPRR2F,SPRR2F	NM_001014450,NM_001014450	hyperM.iPSC
1	151379440	151381390	5	cg13401840,cg00891995,cg00535683,cg07804289,cg10119001	Body,Body,TSS200,TSS1500,TSS1500	_,_	SPRR2C,SPRR2C,SPRR2C,SPRR2C,SPRR2C	NR_003062,NR_003062,NR_003062,NR_003062,NR_003062	hyperM.iPSC
1	151441872	151444201	6	cg02303399,cg00298977,cg02886578,cg21936464,cg08242576,cg18140889	TSS1500,TSS200,5'UTR,5'UTR,Body,3'UTR	_,_	LELP1,LELP1,LELP1,LELP1,LELP1,LELP1	NM_001010857,NM_001010857,NM_001010857,NM_001010857,NM_001010857,NM_001010857	hyperM.iPSC
1	151550336	151550618	2	cg08244156,cg06275635	TSS1500,TSS1500	_,_	PGLYRP3,PGLYRP3	NM_052891,NM_052891	hyperM.iPSC
1	151588635	151589112	2	cg06954535,cg01093088	TSS1500,TSS1500	_,_	PGLYRP4,PGLYRP4	NM_020393,NM_020393	hyperM.iPSC
1	151596696	151597400	4	cg26937038,cg02711163,cg16139316,cg20169988	TSS1500,TSS200,5'UTR,Body	_,_	S100A9,S100A9,S100A9,S100A9	NM_002965,NM_002965,NM_002965,NM_002965	hyperM.iPSC
1	151629551	151630204	4	cg01431057,cg20256009,cg20335425,cg24898863	Body,5'UTR,5'UTR,TSS200	_,_	S100A8,S100A8,S100A8,S100A8	NM_002964,NM_002964,NM_002964,NM_002964	hyperM.iPSC
1	151680265	151680564	2	cg13356175,cg03261155	TSS1500,TSS1500	_,_	S100A7L2,S100A7L2	NM_001045479,NM_001045479	hyperM.iPSC
1	151775135	151775720	4	cg04998420,cg00419564,cg22792473,cg10959711	5'UTR;1stExon,TSS200,TSS200,TSS1500	Island,S_Shore,S_Shore,S_Shore	S100A6;S100A6,S100A6,S100A6,S100A6	NM_014624;NM_014624,NM_014624,NM_014624,NM_014624	hyperM.iPSC
1	151780738	151781066	3	cg16269775,cg08127462,cg19808620	1stExon;5'UTR,TSS200,TSS1500	_,_	S100A5;S100A5,S100A5,S100A5	NM_002962;NM_002962,NM_002962,NM_002962	hyperM.iPSC
1	151782163	151782246	2	cg21217846,cg26303281	TSS1500,TSS1500	_,_	S100A5,S100A5	NM_002962,NM_002962	hyperM.iPSC
1	151785008	151786474	5	cg24691453,cg13091627,cg07587610,cg07245635,cg00018184	TSS200;TSS200,TSS200;TSS200,TSS1500;TSS1500,TSS1500;TSS1500,3'UTR	_,_	S100A4;S100A4,S100A4;S100A4,S100A4;S100A4,S100A4;S100A4,S100A3	NM_019554;NM_002961,NM_019554;NM_002961,NM_002961;NM_019554,NM_002961;NM_019554,NM_002960	hyperM.iPSC
1	151788382	151789177	3	cg15026767,cg09680007,cg06615154	TSS200,TSS200,TSS1500	_,_	S100A3,S100A3,S100A3	NM_002960,NM_002960,NM_002960	hyperM.iPSC
1	151805388	151806028	2	cg22700686,cg02332117	TSS1500,TSS1500	_,_	S100A2,S100A2	NM_005978,NM_005978	hyperM.iPSC
1	151874241	151874974	4	cg17729941,cg22706106,cg14188111,cg17412043	5'UTR;TSS1500,5'UTR;TSS1500,5'UTR;TSS1500,5'UTR	S_Shore,S_Shore,S_Shore,S_Shore	C1orf77;S100A13,C1orf77;S100A13,C1orf77;S100A13,C1orf77	NM_015607;NM_001024210,NM_015607;NM_001024210,NM_015607;NM_001024210,NM_015607	hyperM.iPSC
1	151897672	151898257	2	cg23283690,cg24315913	TSS200,Body	N_Shore,S_Shore	SNAPIN,SNAPIN	NM_012437,NM_012437	hyperM.iPSC
1	151922676	151922892	2	cg17886303,cg16294045	Body,Body	S_Shelf,S_Shelf	NPR1,NPR1	NM_000906,NM_000906	hyperM.iPSC
1	152012835	152013212	2	cg08129092,cg00421624	3'UTR,TSS1500	N_Shore,N_Shore	INTS3,SLC27A3	NM_023015,NM_024330	hyperM.iPSC
1	152028825	152029188	5	cg26182859,cg09762021,cg12067764,cg13502252,cg13064789	_,_	_,_	_,_	_,_	hyperM.iPSC
1	152066492	152067323	2	ch.1.2975077F,cg01402255	Body,Body	_,_	GATAD2B,GATAD2B	NM_020699,NM_020699	hyperM.iPSC
1	152185998	152186971	4	cg17826986,cg04722756,cg24678869,cg15831722	TSS1500,TSS1500,TSS1500,TSS1500;3'UTR	S_Shore,S_Shore,S_Shore,S_Shore	DENND4B,DENND4B,DENND4B,DENND4B;CRTC2	NM_014856,NM_014856,NM_014856,NM_014856;NM_181715	hyperM.iPSC
1	152207171	152207810	2	cg09335321,cg09895920	1stExon;TSS1500;5'UTR,Body;TSS1500	S_Shore,S_Shore	CREB3L4;SLC39A1;CREB3L4,CREB3L4;SLC39A1	NM_130898;NM_014437;NM_130898,NM_130898;NM_014437	hyperM.iPSC
1	152217467	152217491	2	cg03655142,cg01588224	TSS1500,TSS1500	S_Shore,S_Shore	JTB,JTB	NM_006694,NM_006694	hyperM.iPSC
1	152394576	152394665	3	cg16274678,cg11718162,cg19757176	3'UTR;3'UTR;TSS1500;3'UTR;3'UTR;TSS1500,3'UTR;3'UTR;TSS1500;3'UTR;3'UTR;TSS1500,3'UTR;3'UTR;TSS1500;3'UTR;3'UTR;TSS1500	_,_	TPM3;TPM3;NUP210L;TPM3;TPM3;NUP210L,TPM3;TPM3;NUP210L;TPM3;TPM3;NUP210L,TPM3;TPM3;NUP210L;TPM3;TPM3;NUP210L	NM_001043353;NM_153649;NM_001159484;NM_001043351;NM_001043352;NM_207308,NM_001043353;NM_153649;NM_001159484;NM_001043351;NM_001043352;NM_207308,NM_001043353;NM_153649;NM_001159484;NM_001043351;NM_001043352;NM_207308	hyperM.iPSC
1	152430678	152434061	7	cg24490338,cg13740187,cg12205230,cg27313201,cg21536086,cg24880818,cg18645493	Body,TSS200,TSS1500,TSS1500,TSS1500,TSS1500,TSS1500	_,_	TPM3,TPM3,TPM3,TPM3,MIR190B,MIR190B,MIR190B	NM_152263,NM_152263,NM_152263,NM_152263,NR_030600,NR_030600,NR_030600	hyperM.iPSC
1	152458829	152459133	4	cg26808167,cg14415083,cg18262993,cg24472585	TSS1500;TSS1500;Body;Body;Body,TSS1500;TSS1500;Body;Body;Body,TSS1500;TSS1500;Body;Body;Body,TSS1500;Body;Body;TSS200;Body	N_Shore,N_Shore,N_Shore,N_Shore	UBAP2L;UBAP2L;C1orf43;C1orf43;C1orf43,UBAP2L;UBAP2L;C1orf43;C1orf43;C1orf43,UBAP2L;UBAP2L;C1orf43;C1orf43;C1orf43,UBAP2L;C1orf43;C1orf43;UBAP2L;C1orf43	NM_014847;NM_001127320;NM_138740;NM_015449;NM_001098616,NM_014847;NM_001127320;NM_138740;NM_015449;NM_001098616,NM_014847;NM_001127320;NM_138740;NM_015449;NM_001098616,NM_014847;NM_138740;NM_015449;NM_001127320;NM_001098616	hyperM.iPSC
1	152560106	152560275	3	cg20713492,cg06181069,cg01359534	TSS200,TSS200,1stExon	_,_	AQP10,AQP10,AQP10	NM_080429,NM_080429,NM_080429	hyperM.iPSC
1	152565803	152566741	2	cg06811467,cg19760410	TSS1500;5'UTR,TSS200;5'UTR	N_Shore,N_Shore	ATP8B2;ATP8B2,ATP8B2;ATP8B2	NM_020452;NM_001005855,NM_020452;NM_001005855	hyperM.iPSC
1	152568092	152568588	2	cg20934881,cg24671951	Body;Body,Body;Body	Island,S_Shore	ATP8B2;ATP8B2,ATP8B2;ATP8B2	NM_020452;NM_001005855,NM_020452;NM_001005855	hyperM.iPSC
1	152643988	152644245	4	cg24346686,cg01435678,cg07318287,cg25853020	TSS1500;TSS1500,TSS1500;TSS1500,TSS1500;TSS1500,TSS200;TSS200	N_Shore,N_Shore,N_Shore,N_Shore	IL6R;IL6R,IL6R;IL6R,IL6R;IL6R,IL6R;IL6R	NM_000565;NM_181359,NM_000565;NM_181359,NM_000565;NM_181359,NM_000565;NM_181359	hyperM.iPSC
1	152646320	152646803	2	cg09257526,cg04437762	Body;Body,Body;Body	S_Shore,S_Shore	IL6R;IL6R,IL6R;IL6R	NM_181359;NM_000565,NM_181359;NM_000565	hyperM.iPSC
1	152741152	152741797	2	cg19970699,cg18081940	TSS200;5'UTR;TSS200;1stExon,5'UTR;1stExon;1stExon;5'UTR;TSS1500	Island,Island	TDRD10;SHE;TDRD10;SHE,TDRD10;TDRD10;TDRD10;TDRD10;SHE	NM_182499;NM_001010846;NM_001098475;NM_001010846,NM_182499;NM_001098475;NM_182499;NM_001098475;NM_001010846	hyperM.iPSC
1	152795466	152796560	3	cg08031413,cg22128197,cg20324858	Body,Body,Body	N_Shore,N_Shore,N_Shore	UBE2Q1,UBE2Q1,UBE2Q1	NM_017582,NM_017582,NM_017582	hyperM.iPSC
1	152867306	152867412	3	cg25012577,cg06315974,cg12033781	TSS1500,TSS1500,TSS1500	S_Shore,S_Shore,S_Shore	ADAR,ADAR,ADAR	NM_001025107,NM_001025107,NM_001025107	hyperM.iPSC
1	153099741	153099745	2	cg18315680,cg10503610	Body;TSS1500,Body;TSS1500	_,_	KCNN3;KCNN3,KCNN3;KCNN3	NM_002249;NM_170782,NM_002249;NM_170782	hyperM.iPSC
1	153237733	153238126	2	cg16986748,cg15575498	_,_	N_Shore,N_Shore	_,_	_,_	hyperM.iPSC
1	153256467	153257186	2	cg16256492,cg06366107	3'UTR,3'UTR	Island,S_Shore	ZBTB7B,ZBTB7B	NM_015872,NM_015872	hyperM.iPSC
1	153301194	153302372	3	cg27576241,cg13069100,cg16905506	Body;Body;Body;Body;Body;Body,3'UTR;TSS1500;3'UTR;3'UTR;TSS1500;3'UTR;3'UTR;TSS1500;3'UTR,TSS1500;TSS1500;TSS1500	N_Shore,Island,Island	ADAM15;ADAM15;ADAM15;ADAM15;ADAM15;ADAM15,ADAM15;EFNA4;ADAM15;ADAM15;EFNA4;ADAM15;ADAM15;EFNA4;ADAM15,EFNA4;EFNA4;EFNA4	NM_207194;NM_207196;NM_207197;NM_003815;NM_207195;NM_207191,NM_207197;NM_182689;NM_207195;NM_207194;NM_182690;NM_207191;NM_207196;NM_005227;NM_003815,NM_182690;NM_182689;NM_005227	hypoM.iPSC
1	153310507	153310591	2	cg16269418,cg03006527	_,_	Island,S_Shore	_,_	_,_	hyperM.iPSC
1	153310933	153310969	3	cg22678754,cg27166581,cg08947894	_,_	S_Shore,S_Shore,S_Shore	_,_	_,_	hypoM.iPSC
1	153369846	153370193	2	cg06639488,cg14612733	Body;Body,Body;Body	S_Shelf,S_Shelf	EFNA1;EFNA1,EFNA1;EFNA1	NM_182685;NM_004428,NM_182685;NM_004428	hyperM.iPSC
1	153429376	153429380	2	cg22500132,cg22531371	TSS200;TSS200;TSS200;TSS200;TSS200;TSS200;TSS200,TSS200;TSS200;TSS200;TSS200;TSS200;TSS200;TSS200	N_Shore,N_Shore	MUC1;MUC1;MUC1;MUC1;MUC1;MUC1;MUC1,MUC1;MUC1;MUC1;MUC1;MUC1;MUC1;MUC1	NM_001018016;NM_001044391;NM_001044393;NM_001044392;NM_001044390;NM_002456;NM_001018017,NM_001018016;NM_001044391;NM_001044393;NM_001044392;NM_001044390;NM_002456;NM_001018017	hypoM.iPSC
1	153455528	153455677	2	cg14665690,cg12218542	Body,Body	_,_	GBAP1,GBAP1	NR_002188,NR_002188	hyperM.iPSC
1	153478086	153478360	2	cg11399409,cg19257864	5'UTR;TSS1500;5'UTR;5'UTR;5'UTR,5'UTR;TSS1500;5'UTR;5'UTR;5'UTR	_,_	GBA;GBA;GBA;GBA;GBA,GBA;GBA;GBA;GBA;GBA	NM_001005742;NM_000157;NM_001005750;NM_001005741;NM_001005749,NM_001005742;NM_000157;NM_001005750;NM_001005741;NM_001005749	hyperM.iPSC
1	153492388	153492432	2	cg18568145,cg07189204	TSS1500;TSS1500,3'UTR;TSS1500;TSS1500;3'UTR	S_Shore,S_Shore	FAM189B;FAM189B,SCAMP3;FAM189B;FAM189B;SCAMP3	NM_198264;NM_006589,NM_052837;NM_198264;NM_006589;NM_005698	hyperM.iPSC
1	153499003	153499649	2	cg01745448,cg06444207	TSS200;TSS200,TSS1500;Body;TSS1500	S_Shore,S_Shore	SCAMP3;SCAMP3,SCAMP3;CLK2;SCAMP3	NM_005698;NM_052837,NM_005698;NM_003993;NM_052837	hyperM.iPSC
1	153537490	153538386	3	cg15708776,cg23993235,cg15490880	TSS200;Body,TSS200;Body,TSS1500;TSS1500	_,_	PKLR;PKLR,PKLR;PKLR,PKLR;PKLR	NM_181871;NM_000298,NM_181871;NM_000298,NM_181871;NM_000298	hyperM.iPSC
1	153543997	153544127	2	cg06352803,cg06979924	TSS1500;TSS1500;TSS1500,TSS1500;TSS1500;TSS1500	N_Shore,N_Shore	FDPS;FDPS;FDPS,FDPS;FDPS;FDPS	NM_001135822;NM_002004;NM_001135821,NM_001135822;NM_002004;NM_001135821	hyperM.iPSC
1	153556860	153557921	4	cg24547565,cg15113766,cg15676040,cg22234962	TSS1500;Body;Body;TSS1500;Body,TSS1500;3'UTR;3'UTR;3'UTR;TSS1500;3'UTR,TSS200;3'UTR;3'UTR;3'UTR;TSS200;3'UTR,5'UTR;5'UTR;5'UTR	N_Shore,N_Shore,N_Shore,N_Shore	RUSC1;FDPS;FDPS;RUSC1;FDPS,RUSC1;C1orf104;FDPS;FDPS;RUSC1;FDPS,RUSC1;C1orf104;FDPS;FDPS;RUSC1;FDPS,RUSC1;RUSC1;C1orf104	NM_001105204;NM_001135822;NM_001135821;NM_001105203;NM_002004,NM_001105204;NM_001039517;NM_002004;NM_001135822;NM_001105203;NM_001135821,NM_001105203;NM_001039517;NM_002004;NM_001135822;NM_001105204;NM_001135821,NM_001105203;NM_001105204;NM_001039517	hyperM.iPSC
1	154094798	154096173	4	cg17930201,cg12738981,cg06440960,cg25446086	TSS1500;TSS1500;TSS1500,TSS1500;TSS1500;TSS1500,TSS1500,1stExon;5'UTR	N_Shore,N_Shore,N_Shore,N_Shore	SYT11;GON4L;GON4L,SYT11;GON4L;GON4L,SYT11,SYT11;SYT11	NM_152280;NM_032292;NM_001037533,NM_152280;NM_032292;NM_001037533,NM_152280,NM_152280;NM_152280	hyperM.iPSC
1	154198253	154198482	3	cg20847292,cg13921921,cg14204586	Body;Body;Body,Body;Body;Body,Body;Body;Body	_,_	ARHGEF2;ARHGEF2;ARHGEF2,ARHGEF2;ARHGEF2;ARHGEF2,ARHGEF2;ARHGEF2;ARHGEF2	NM_004723;NM_001162383;NM_001162384,NM_004723;NM_001162383;NM_001162384,NM_004723;NM_001162383;NM_001162384	hyperM.iPSC
1	154297468	154297806	2	cg09243900,cg19580810	TSS200,1stExon;5'UTR	_,_	RAB25,RAB25;RAB25	NM_020387,NM_020387;NM_020387	hypoM.iPSC
1	154478058	154478475	6	cg24843609,cg17419597,cg13282594,cg11519176,cg23729443,cg09996284	TSS1500,TSS1500,TSS1500,TSS200,TSS200,TSS200	N_Shelf,N_Shelf,N_Shelf,N_Shelf,N_Shelf,N_Shelf	BGLAP,BGLAP,BGLAP,BGLAP,BGLAP,BGLAP	NM_199173,NM_199173,NM_199173,NM_199173,NM_199173,NM_199173	hyperM.iPSC
1	154482042	154482575	3	cg20333836,cg26022183,cg20302342	Body;Body,5'UTR;Body,5'UTR;Body	Island,Island,S_Shore	PAQR6;PAQR6,PAQR6;PAQR6,PAQR6;PAQR6	NM_198406;NM_024897,NM_024897;NM_198406,NM_024897;NM_198406	hyperM.iPSC
1	154483802	154484718	5	cg00105102,cg06882877,cg10046892,cg26541780,cg12303685	5'UTR;5'UTR,5'UTR;TSS200;1stExon,TSS200;TSS200,TSS200;TSS200,TSS1500;TSS1500	S_Shore,S_Shore,S_Shelf,S_Shelf,S_Shelf	PAQR6;PAQR6,PAQR6;PAQR6;PAQR6,PAQR6;PAQR6,PAQR6;PAQR6,PAQR6;PAQR6	NM_024897;NM_198406,NM_024897;NM_198406;NM_024897,NM_198406;NM_024897,NM_198406;NM_024897,NM_198406;NM_024897	hyperM.iPSC
1	154517904	154518080	2	cg18973101,cg14500718	TSS1500;Body,TSS1500;Body	_,_	TMEM79;SMG5,TMEM79;SMG5	NR_026678;NM_015327,NR_026678;NM_015327	hyperM.iPSC
1	154519697	154519776	2	cg00500989,cg24685761	TSS1500;Body;TSS1500,TSS1500;Body;TSS1500	_,_	SMG5;TMEM79;TMEM79,SMG5;TMEM79;TMEM79	NM_015327;NR_026678;NM_032323,NM_015327;NR_026678;NM_032323	hyperM.iPSC
1	154573942	154573972	2	cg10585648,cg18993334	Body;5'UTR;1stExon;Body;Body,Body;5'UTR;Body;Body	N_Shore,N_Shore	CCT3;C1orf182;C1orf182;CCT3;CCT3,CCT3;C1orf182;CCT3;CCT3	NM_001008800;NM_144627;NM_144627;NM_001008883;NM_005998,NM_001008800;NM_144627;NM_001008883;NM_005998	hyperM.iPSC
1	154726610	154727077	3	cg11739633,cg24642236,cg26121730	5'UTR,5'UTR,5'UTR	_,_	MEF2D,MEF2D,MEF2D	NM_005920,NM_005920,NM_005920	hyperM.iPSC
1	154728826	154729248	2	cg26885488,cg25271672	5'UTR,5'UTR	_,_	MEF2D,MEF2D	NM_005920,NM_005920	hyperM.iPSC
1	154809325	154809462	2	cg07956012,cg11716578	TSS1500,TSS1500	S_Shore,S_Shore	IQGAP3,IQGAP3	NM_178229,NM_178229	hyperM.iPSC
1	154814825	154816002	3	cg21010646,cg03712798,cg17478282	TSS1500,TSS1500,TSS200	_,_	TTC24,TTC24,TTC24	NM_001105669,NM_001105669,NM_001105669	hyperM.iPSC
1	154838167	154838175	2	cg11192022,cg06957169	TSS1500;TSS1500,TSS1500;TSS1500	_,_	GPATCH4;GPATCH4,GPATCH4;GPATCH4	NM_015590;NM_182679,NM_015590;NM_182679	hyperM.iPSC
1	154882586	154883428	5	cg23640929,cg03265671,cg00502190,cg10389771,cg16269733	Body;Body,Body;Body,Body;Body,Body;Body,Body;Body	N_Shore,Island,Island,Island,Island	BCAN;BCAN,BCAN;BCAN,BCAN;BCAN,BCAN;BCAN,BCAN;BCAN	NM_198427;NM_021948,NM_198427;NM_021948,NM_198427;NM_021948,NM_198427;NM_021948,NM_198427;NM_021948	hyperM.iPSC
1	154896036	154897872	4	cg10221746,cg15934095,cg15101245,cg07134230	_,_	S_Shore,S_Shelf,S_Shelf,S_Shelf	_,_	_,_	hyperM.iPSC
1	154962520	154964248	5	cg00341602,cg05809481,cg09507184,cg19377421,cg10805956	Body,Body,1stExon;TSS1500;TSS1500,1stExon;TSS1500;TSS1500,1stExon;5'UTR;TSS1500;TSS1500	N_Shelf,N_Shore,N_Shore,N_Shore,N_Shore	ISG20L2,ISG20L2,ISG20L2;C1orf66;C1orf66,ISG20L2;C1orf66;C1orf66,ISG20L2;ISG20L2;C1orf66;C1orf66	NM_030980,NM_030980,NM_030980;NM_015997;NM_001142560,NM_030980;NM_015997;NM_001142560,NM_030980;NM_030980;NM_015997;NM_001142560	hyperM.iPSC
1	154989034	154989300	2	cg06961289,cg19599803	TSS200;TSS1500;TSS1500,TSS1500;TSS1500;TSS1500	S_Shore,S_Shore	HDGF;HDGF;HDGF,HDGF;HDGF;HDGF	NM_001126050;NM_004494;NM_001126051,NM_001126050;NM_004494;NM_001126051	hyperM.iPSC
1	155003212	155003395	2	cg07313589,cg06106793	TSS1500;TSS1500,TSS1500;TSS1500	N_Shore,N_Shore	PRCC;PRCC,PRCC;PRCC	NM_005973;NM_199416,NM_005973;NM_199416	hyperM.iPSC
1	155053225	155053277	3	cg20839149,cg12499211,cg12039611	5'UTR;Body;1stExon;TSS1500;5'UTR;5'UTR;1stExon;1stExon;5'UTR;1stExon,Body;TSS200;TSS200;TSS1500;TSS200;TSS200,Body;TSS200;TSS200;TSS1500;TSS200;TSS200	S_Shelf,S_Shelf,S_Shelf	SH2D2A;NTRK1;SH2D2A;SH2D2A;SH2D2A;SH2D2A;SH2D2A;SH2D2A;SH2D2A;SH2D2A,NTRK1;SH2D2A;SH2D2A;SH2D2A;SH2D2A;SH2D2A,NTRK1;SH2D2A;SH2D2A;SH2D2A;SH2D2A;SH2D2A	NM_001161444;NM_001007792;NM_003975;NM_001161443;NM_003975;NM_001161442;NM_001161442;NM_001161444;NM_001161441;NM_001161441,NM_001007792;NM_003975;NM_001161444;NM_001161443;NM_001161442;NM_001161441,NM_001007792;NM_003975;NM_001161444;NM_001161443;NM_001161442;NM_001161441	hyperM.iPSC
1	155081112	155081185	2	cg24845595,cg08728702	Body;Body,Body;Body	N_Shore,N_Shore	NTRK1;INSRR,NTRK1;INSRR	NM_001007792;NM_014215,NM_001007792;NM_014215	hyperM.iPSC
1	155129753	155130267	2	cg20948486,cg06188545	TSS1500,5'UTR	N_Shore,Island	PEAR1,PEAR1	NM_001080471,NM_001080471	hypoM.iPSC
1	155156506	155157406	2	cg18863922,cg16268769	TSS1500,Body	N_Shore,Island	C1orf92,C1orf92	NM_144702,NM_144702	hypoM.iPSC
1	155173174	155173973	2	cg08480098,cg26543539	Body;TSS1500;Body,Body;TSS1500;Body	_,_	ARHGEF11;MIR765;ARHGEF11,ARHGEF11;MIR765;ARHGEF11	NM_014784;NR_030527;NM_198236,NM_014784;NR_030527;NM_198236	hyperM.iPSC
1	155279590	155279970	2	cg01960096,cg12632832	Body;Body,Body;Body	N_Shelf,N_Shore	ARHGEF11;ARHGEF11,ARHGEF11;ARHGEF11	NM_014784;NM_198236,NM_014784;NM_198236	hyperM.iPSC
1	155431180	155431758	3	cg21687740,cg09504320,cg13355424	_,_	Island,Island,Island	_,_	_,_	hyperM.iPSC
1	155757170	155757592	2	cg14833337,cg21443284	Body,Body	_,_	FCRL5,FCRL5	NM_031281,NM_031281	hyperM.iPSC
1	155936844	155938383	5	cg25259754,cg17134153,cg08786003,cg15602298,cg15202552	Body,5'UTR,TSS200,TSS200,TSS1500	_,_	FCRL3,FCRL3,FCRL3,FCRL3,FCRL3	NM_052939,NM_052939,NM_052939,NM_052939,NM_052939	hyperM.iPSC
1	156161851	156163024	4	cg15649671,cg25024214,cg26114457,cg25028404	_,_	_,_	_,_	_,_	hyperM.iPSC
1	156377241	156377974	2	cg06617093,cg11136041	_,_	_,_	_,_	_,_	hyperM.iPSC
1	156415852	156416329	2	cg13765621,cg24411075	TSS1500,TSS200	N_Shore,N_Shore	CD1D,CD1D	NM_001766,NM_001766	hyperM.iPSC
1	156524990	156526550	5	cg00173005,cg27534912,cg16993682,cg22610434,cg07548313	TSS1500,TSS1500,TSS1500,1stExon,Body	_,_	CD1C,CD1C,CD1C,CD1C,CD1C	NM_001765,NM_001765,NM_001765,NM_001765,NM_001765	hyperM.iPSC
1	156567357	156567662	2	cg15952487,cg04574507	Body,Body	_,_	CD1B,CD1B	NM_001764,NM_001764	hyperM.iPSC
1	156590106	156591878	4	cg03701795,cg12200412,cg26014409,cg09664215	TSS200;TSS200;TSS200;TSS200;TSS200;TSS200,Body;Body;Body;Body;Body;Body,Body;Body;Body;Body;Body;Body,Body;Body;Body;Body;Body;Body	_,_	CD1E;CD1E;CD1E;CD1E;CD1E;CD1E,CD1E;CD1E;CD1E;CD1E;CD1E;CD1E,CD1E;CD1E;CD1E;CD1E;CD1E;CD1E,CD1E;CD1E;CD1E;CD1E;CD1E;CD1E	NM_030893;NM_001042586;NM_001042587;NM_001042584;NM_001042585;NM_001042583,NM_001042587;NM_001042583;NM_001042584;NM_001042585;NM_001042586;NM_030893,NM_001042587;NM_001042583;NM_001042584;NM_001042585;NM_001042586;NM_030893,NM_001042587;NM_001042583;NM_001042584;NM_001042585;NM_001042586;NM_030893	hyperM.iPSC
1	156635513	156635736	2	cg15852352,cg15593510	1stExon,1stExon	_,_	OR10T2,OR10T2	NM_001004475,NM_001004475	hyperM.iPSC
1	156657273	156657743	4	cg26151206,cg27235829,cg08400475,cg01733284	1stExon,TSS200,TSS200,TSS1500	_,_	OR10K2,OR10K2,OR10K2,OR10K2	NM_001004476,NM_001004476,NM_001004476,NM_001004476	hyperM.iPSC
1	156732494	156732587	2	cg06100240,cg13353152	_,_	_,_	_,_	_,_	hyperM.iPSC
1	156815901	156816034	2	cg04923174,cg12129480	1stExon,1stExon	_,_	OR10X1,OR10X1	NM_001004477,NM_001004477	hyperM.iPSC
1	156990563	156991924	4	cg22601108,cg17025555,cg02613223,cg06084534	TSS1500,TSS1500,1stExon,1stExon	_,_	OR6K6,OR6K6,OR6K6,OR6K6	NM_001005184,NM_001005184,NM_001005184,NM_001005184	hyperM.iPSC
1	157002736	157002936	2	cg04972930,cg24381587	1stExon,1stExon	_,_	OR6N1,OR6N1	NM_001005185,NM_001005185	hyperM.iPSC
1	157004215	157004444	2	cg09135320,cg14514991	TSS1500,TSS1500	_,_	OR6N1,OR6N1	NM_001005185,NM_001005185	hyperM.iPSC
1	157166712	157167173	2	cg21576886,cg26246880	TSS1500;TSS1500;TSS1500;TSS1500,TSS1500;TSS1500;TSS1500;TSS1500	_,_	PYHIN1;PYHIN1;PYHIN1;PYHIN1,PYHIN1;PYHIN1;PYHIN1;PYHIN1	NM_198930;NM_198929;NM_152501;NM_198928,NM_198930;NM_198929;NM_152501;NM_198928	hyperM.iPSC
1	157245581	157246465	5	cg21406461,cg01342196,cg17601658,cg07463059,cg20597486	TSS1500,TSS200,TSS200,5'UTR;1stExon,5'UTR;1stExon	_,_	IFI16,IFI16,IFI16,IFI16;IFI16,IFI16;IFI16	NM_005531,NM_005531,NM_005531,NM_005531;NM_005531,NM_005531;NM_005531	hyperM.iPSC
1	157313075	157313658	3	cg27541604,cg00490406,cg07195224	5'UTR;1stExon,TSS200,TSS1500	_,_	AIM2;AIM2,AIM2,AIM2	NM_004833;NM_004833,NM_004833,NM_004833	hyperM.iPSC
1	157439840	157441919	7	cg10808936,cg27232482,cg19260329,cg07202479,cg18552413,cg04922029,cg20003179	TSS1500,TSS1500;TSS1500,TSS1500;TSS1500,TSS1500;TSS1500,TSS1500;5'UTR;1stExon,TSS1500;5'UTR;1stExon,Body;1stExon	_,_	DARC,DARC;DARC,DARC;DARC,DARC;DARC,DARC;DARC;DARC,DARC;DARC;DARC,DARC;DARC	NM_002036,NM_001122951;NM_002036,NM_001122951;NM_002036,NM_001122951;NM_002036,NM_001122951;NM_002036;NM_002036,NM_001122951;NM_002036;NM_002036,NM_002036;NM_001122951	hyperM.iPSC
1	157550706	157550922	2	cg23774016,cg13507224	1stExon,1stExon	_,_	OR10J3,OR10J3	NM_001004467,NM_001004467	hyperM.iPSC
1	157773183	157773786	4	cg15015426,cg07037019,cg06251978,cg26043322	TSS1500,TSS1500,TSS1500,TSS1500	_,_	OR10J5,OR10J5,OR10J5,OR10J5	NM_001004469,NM_001004469,NM_001004469,NM_001004469	hyperM.iPSC
1	157824138	157825136	4	cg01443488,cg03856044,cg26353877,cg21291134	TSS200,5'UTR;1stExon,Body,3'UTR	_,_	APCS,APCS;APCS,APCS,APCS	NM_001639,NM_001639;NM_001639,NM_001639,NM_001639	hyperM.iPSC
1	157949971	157951809	7	cg09267046,cg14988790,cg17520909,cg15553852,cg03543081,cg05147692,cg15076824	Body,Body,Body,Body,TSS200,TSS1500,TSS1500	_,_	CRP,CRP,CRP,CRP,CRP,CRP,CRP	NM_000567,NM_000567,NM_000567,NM_000567,NM_000567,NM_000567,NM_000567	hyperM.iPSC
1	158091617	158092252	3	cg15063322,cg07961479,cg12217625	Body;1stExon,Body;TSS200,Body;TSS1500	Island,S_Shore,S_Shore	VSIG8;C1orf204,VSIG8;C1orf204,VSIG8;C1orf204	NM_001013661;NM_001134233,NM_001013661;NM_001134233,NM_001013661;NM_001134233	hyperM.iPSC
1	158136701	158136950	2	cg25153824,cg03685774	TSS200,TSS1500	Island,S_Shore	CCDC19,CCDC19	NM_012337,NM_012337	hypoM.iPSC
1	158160295	158160685	3	cg03651478,cg22698489,cg16107628	5'UTR,5'UTR,5'UTR	N_Shore,N_Shore,N_Shore	TAGLN2,TAGLN2,TAGLN2	NM_003564,NM_003564,NM_003564	hyperM.iPSC
1	158162215	158162288	2	cg21571466,cg04116858	TSS1500,TSS1500	S_Shore,S_Shore	TAGLN2,TAGLN2	NM_003564,NM_003564	hyperM.iPSC
1	158190149	158191165	3	cg09737668,cg21022868,cg21817012	Body;Body;Body,Body;Body;Body,TSS1500;TSS1500;TSS1500	_,_	SLAMF9;SLAMF9;SLAMF9,SLAMF9;SLAMF9;SLAMF9,SLAMF9;SLAMF9;SLAMF9	NM_001146173;NM_033438;NM_001146172,NM_001146173;NM_033438;NM_001146172,NM_001146173;NM_001146172;NM_033438	hyperM.iPSC
1	158317005	158318062	6	cg27315635,cg12907876,cg06808585,cg24509168,cg08665772,cg09808786	TSS1500,TSS1500,TSS1500,TSS200,5'UTR;1stExon,5'UTR;1stExon	N_Shelf,N_Shelf,N_Shelf,N_Shelf,N_Shelf,N_Shelf	KCNJ9,KCNJ9,KCNJ9,KCNJ9,KCNJ9;KCNJ9,KCNJ9;KCNJ9	NM_004983,NM_004983,NM_004983,NM_004983,NM_004983;NM_004983,NM_004983;NM_004983	hyperM.iPSC
1	158351022	158351403	2	cg13149890,cg08390254	TSS1500,TSS1500	_,_	ATP1A2,ATP1A2	NM_000702,NM_000702	hyperM.iPSC
1	158352057	158352205	4	cg06210630,cg07177379,cg24437523,cg20632887	TSS200,TSS200,1stExon;5'UTR,1stExon;5'UTR	_,_	ATP1A2,ATP1A2,ATP1A2;ATP1A2,ATP1A2;ATP1A2	NM_000702,NM_000702,NM_000702;NM_000702,NM_000702;NM_000702	hypoM.iPSC
1	158364672	158365203	2	cg03525467,cg09152490	Body,Body	_,_	ATP1A2,ATP1A2	NM_000702,NM_000702	hyperM.iPSC
1	158426294	158426730	3	cg02297709,cg15926420,cg08246428	TSS1500,TSS1500,TSS200	_,_	CASQ1,CASQ1,CASQ1	NM_001231,NM_001231,NM_001231	hyperM.iPSC
1	158578517	158578806	2	cg00689010,cg10382814	Body;Body;TSS1500,Body;Body;TSS1500	N_Shore,N_Shore	COPA;COPA;NCSTN,COPA;COPA;NCSTN	NM_004371;NM_001098398;NM_015331,NM_004371;NM_001098398;NM_015331	hyperM.iPSC
1	158603099	158603336	5	cg18023842,cg08247612,cg13992678,cg00006397,cg00881010	TSS1500,TSS1500,TSS1500,TSS200,TSS200	_,N_Shelf,N_Shelf	NHLH1,NHLH1,NHLH1,NHLH1,NHLH1	NM_005598,NM_005598,NM_005598,NM_005598,NM_005598	hyperM.iPSC
1	158607332	158607730	2	cg26875665,cg01877084	Body,3'UTR	Island,S_Shore	NHLH1,NHLH1	NM_005598,NM_005598	hyperM.iPSC
1	158656912	158657733	2	cg06928484,cg02660165	Body,Body	S_Shore,S_Shore	VANGL2,VANGL2	NM_020335,NM_020335	hyperM.iPSC
1	158759485	158759713	2	cg10671066,cg21829783	Body,TSS200	_,_	SLAMF6,SLAMF6	NM_052931,NM_052931	hyperM.iPSC
1	158786049	158787249	4	cg27304328,cg12034938,cg24691964,cg19312356	Body,Body,Body,Body	_,_	CD84,CD84,CD84,CD84	NM_003874,NM_003874,NM_003874,NM_003874	hyperM.iPSC
1	158815782	158815885	2	cg16776350,cg13978689	Body,TSS200	_,_	CD84,CD84	NM_003874,NM_003874	hyperM.iPSC
1	158817112	158817271	2	cg02945019,cg19718360	TSS1500,TSS1500	_,_	CD84,CD84	NM_003874,NM_003874	hyperM.iPSC
1	158883228	158884598	8	cg20535085,cg18881723,cg18886071,cg01710351,cg00149213,cg03950000,cg21920303,cg05694771	Body,5'UTR;1stExon,5'UTR;1stExon,TSS200,TSS200,TSS1500,TSS1500,TSS1500	_,_	SLAMF1,SLAMF1;SLAMF1,SLAMF1;SLAMF1,SLAMF1,SLAMF1,SLAMF1,SLAMF1,SLAMF1	NM_003037,NM_003037;NM_003037,NM_003037;NM_003037,NM_003037,NM_003037,NM_003037,NM_003037,NM_003037	hyperM.iPSC
1	158948028	158949279	5	cg13311440,cg19408145,cg05200628,cg16909402,cg24154340	Body,1stExon,TSS200,TSS1500,TSS1500	_,_	CD48,CD48,CD48,CD48,CD48	NM_001778,NM_001778,NM_001778,NM_001778,NM_001778	hyperM.iPSC
1	158975611	158975863	3	cg04244970,cg07837085,cg11721194	TSS200,TSS200,Body	_,_	SLAMF7,SLAMF7,SLAMF7	NM_021181,NM_021181,NM_021181	hyperM.iPSC
1	159031288	159033159	5	cg12810626,cg23038349,cg18920397,cg18865207,cg01367992	TSS1500;TSS1500,TSS1500;TSS1500,TSS200;TSS200,TSS200;TSS200,Body;Body	_,_	LY9;LY9,LY9;LY9,LY9;LY9,LY9;LY9,LY9;LY9	NM_001033667;NM_002348,NM_001033667;NM_002348,NM_001033667;NM_002348,NM_001033667;NM_002348,NM_001033667;NM_002348	hyperM.iPSC
1	159099286	159100184	2	cg10106388,cg11939496	1stExon;5'UTR;1stExon;5'UTR;5'UTR;1stExon,TSS1500;TSS1500;TSS1500	_,_	CD244;CD244;CD244;CD244;CD244;CD244,CD244;CD244;CD244	NM_016382;NM_001166663;NM_001166663;NM_001166664;NM_016382;NM_001166664,NM_001166663;NM_016382;NM_001166664	hyperM.iPSC
1	159121578	159121772	2	cg21476940,cg10094191	5'UTR;1stExon,TSS200	_,_	ITLN1;ITLN1,ITLN1	NM_017625;NM_017625,NM_017625	hyperM.iPSC
1	159256889	159257076	2	cg00945666,cg11161846	Body,Body	N_Shore,N_Shore	F11R,F11R	NM_016946,NM_016946	hypoM.iPSC
1	159316067	159316279	4	cg24599107,cg10888244,cg16276523,cg10453343	Body,Body,Body,Body	Island,Island,Island,Island	PVRL4,PVRL4,PVRL4,PVRL4	NM_030916,NM_030916,NM_030916,NM_030916	hyperM.iPSC
1	159355581	159355726	2	cg06182359,cg05650171	TSS1500;Body,TSS1500;Body	S_Shore,S_Shore	PFDN2;NIT1,PFDN2;NIT1	NM_012394;NM_005600,NM_012394;NM_005600	hyperM.iPSC
1	159395191	159395344	3	cg01447427,cg17017284,cg18176482	TSS1500;3'UTR;TSS1500,TSS1500;TSS1500,TSS1500;TSS1500	N_Shore,N_Shore,N_Shore	USP21;UFC1;USP21,USP21;USP21,USP21;USP21	NM_012475;NM_016406;NM_001014443,NM_012475;NM_001014443,NM_012475;NM_001014443	hyperM.iPSC
1	159434369	159435075	2	cg04436964,cg17904988	TSS1500;Body,TSS1500;1stExon;5'UTR	_,N_Shelf	NDUFS2;ADAMTS4,NDUFS2;ADAMTS4;ADAMTS4	NM_004550;NM_005099,NM_004550;NM_005099;NM_005099	hyperM.iPSC
1	159437835	159438256	4	cg24049880,cg05656486,cg08850169,cg23274951	5'UTR;TSS1500,5'UTR;TSS1500,5'UTR;TSS1500,5'UTR;TSS1500	N_Shore,N_Shore,N_Shore,N_Shore	NDUFS2;NDUFS2,NDUFS2;NDUFS2,NDUFS2;NDUFS2,NDUFS2;NDUFS2	NM_004550;NM_001166159,NM_004550;NM_001166159,NM_004550;NM_001166159,NM_004550;NM_001166159	hyperM.iPSC
1	159451685	159451716	2	cg24465943,cg13853198	TSS200,1stExon;5'UTR	_,_	FCER1G,FCER1G;FCER1G	NM_004106,NM_004106;NM_004106	hyperM.iPSC
1	159545732	159546386	2	cg10431340,cg00259886	Body,TSS200	_,_	MPZ,MPZ	NM_000530,NM_000530	hyperM.iPSC
1	159550457	159550542	4	cg11744295,cg08716396,cg15152945,cg02656741	TSS1500;TSS1500;TSS1500;TSS1500;TSS1500,TSS1500;TSS1500;TSS1500;TSS1500;TSS1500,TSS1500;TSS1500;TSS1500;TSS1500;TSS1500,TSS1500;TSS1500;TSS1500;TSS1500;TSS1500	Island,Island,Island,Island	SDHC;SDHC;LOC642502;SDHC;SDHC,SDHC;SDHC;LOC642502;SDHC;SDHC,SDHC;SDHC;LOC642502;SDHC;SDHC,SDHC;SDHC;LOC642502;SDHC;SDHC	NM_001035512;NM_001035513;NM_001089593;NM_001035511;NM_003001,NM_001035512;NM_001035513;NM_001089593;NM_001035511;NM_003001,NM_001035512;NM_001035513;NM_001089593;NM_001035511;NM_003001,NM_001035512;NM_001035513;NM_001089593;NM_001035511;NM_003001	hyperM.iPSC
1	159635411	159635571	2	cg23915527,cg03441844	_,_	N_Shore,Island	_,_	_,_	hyperM.iPSC
1	159942890	159943205	3	cg24664855,cg05033369,cg24074594	TSS1500,TSS1500,TSS200	_,_	FCRLA,FCRLA,FCRLA	NM_032738,NM_032738,NM_032738	hyperM.iPSC
1	160307696	160307759	2	cg09008080,cg17468569	Body;Body,Body;Body	S_Shore,S_Shore	NOS1AP;NOS1AP,NOS1AP;NOS1AP	NM_014697;NM_001164757,NM_014697;NM_001164757	hypoM.iPSC
1	160603501	160603999	3	cg02858267,cg12486795,cg26813162	Body;Body;Body,3'UTR;3'UTR;3'UTR,3'UTR;3'UTR;3'UTR	Island,Island,S_Shore	NOS1AP;NOS1AP;NOS1AP,NOS1AP;NOS1AP;NOS1AP,NOS1AP;NOS1AP;NOS1AP	NM_014697;NM_001126060;NM_001164757,NM_014697;NM_001164757;NM_001126060,NM_014697;NM_001164757;NM_001126060	hyperM.iPSC
1	160614376	160614634	2	cg16359129,cg14701962	TSS1500;TSS1500,TSS1500;TSS1500	_,_	C1orf226;C1orf111,C1orf226;C1orf111	NM_001135240;NM_182581,NM_001135240;NM_182581	hyperM.iPSC
1	160617681	160618647	2	cg15492834,cg11342789	Body;TSS1500,Body;Body	_,_	C1orf226;C1orf226,C1orf226;C1orf226	NM_001135240;NM_001085375,NM_001085375;NM_001135240	hyperM.iPSC
1	160867958	160869157	7	cg17217691,cg23028772,cg00819233,cg17496788,cg06325209,cg00457087,cg21880888	TSS1500;TSS1500,TSS1500;TSS1500,TSS1500;TSS1500,TSS1500;TSS1500,TSS200;TSS200,1stExon;1stExon;5'UTR;5'UTR,5'UTR;5'UTR	_,_	DDR2;DDR2,DDR2;DDR2,DDR2;DDR2,DDR2;DDR2,DDR2;DDR2,DDR2;DDR2;DDR2;DDR2,DDR2;DDR2	NM_001014796;NM_006182,NM_001014796;NM_006182,NM_001014796;NM_006182,NM_001014796;NM_006182,NM_006182;NM_001014796,NM_001014796;NM_006182;NM_006182;NM_001014796,NM_006182;NM_001014796	hyperM.iPSC
1	161304408	161305327	2	cg01367097,cg15923350	TSS1500;TSS1500;TSS1500,1stExon;5'UTR;TSS1500;TSS200	_,_	RGS4;RGS4;RGS4,RGS4;RGS4;RGS4;RGS4	NM_001102445;NM_001113381;NM_005613,NM_001102445;NM_001102445;NM_001113381;NM_005613	hyperM.iPSC
1	161439538	161439886	2	cg00250483,cg02579477	TSS200,TSS1500	_,_	RGS5,RGS5	NM_003617,NM_003617	hypoM.iPSC
1	162556803	162556865	3	cg09871685,cg23619357,cg24043916	_,_	N_Shore,N_Shore,N_Shore	_,_	_,_	hyperM.iPSC
1	162812407	162812767	3	cg00222472,cg20682146,cg22238122	Body,Body,Body	Island,Island,S_Shore	PBX1,PBX1,PBX1	NM_002585,NM_002585,NM_002585	hypoM.iPSC
1	162947891	162948276	2	cg25148025,cg14031054	Body,Body	_,_	PBX1,PBX1	NM_002585,NM_002585	hyperM.iPSC
1	163588723	163591614	6	cg07135032,cg10315533,cg19924619,cg17787084,cg09806671,cg24650501	Body,Body,Body,Body,Body,5'UTR;1stExon	Island,N_Shore,Island,N_Shore,Island,Island	LMX1A,LMX1A,LMX1A,LMX1A,LMX1A,LMX1A;LMX1A	NM_177398,NM_177398,NM_177398,NM_177398,NM_177398,NM_177398;NM_177398	hypoM.iPSC
1	163592893	163592969	3	cg23971170,cg02361878,cg02054776	TSS1500,TSS1500,TSS1500	Island,Island,S_Shore	LMX1A,LMX1A,LMX1A	NM_177398,NM_177398,NM_177398	hypoM.iPSC
1	163596343	163596581	2	cg05267756,cg21413947	_,_	S_Shelf,S_Shelf	_,_	_,_	hyperM.iPSC
1	163679947	163681235	3	cg07163547,cg00349776,cg08623787	Body;Body,5'UTR;5'UTR;1stExon;1stExon,TSS200;TSS200	_,_	RXRG;RXRG,RXRG;RXRG;RXRG;RXRG,RXRG;RXRG	NM_006917;NM_001009598,NM_001009598;NM_006917;NM_006917;NM_001009598,NM_006917;NM_001009598	hyperM.iPSC
1	163681430	163681781	3	cg12404281,cg17514495,cg07091781	TSS1500;TSS1500,TSS1500;TSS1500,TSS1500;TSS1500	_,_	RXRG;RXRG,RXRG;RXRG,RXRG;RXRG	NM_006917;NM_001009598,NM_006917;NM_001009598,NM_006917;NM_001009598	hypoM.iPSC
1	163779022	163780340	4	cg03454607,cg16509443,cg20964423,cg18168448	Body;TSS1500,Body;TSS1500,Body;TSS200,1stExon;Body	_,_	LOC400794;LRRC52,LOC400794;LRRC52,LOC400794;LRRC52,LRRC52;LOC400794	NR_026744;NM_001005214,NR_026744;NM_001005214,NR_026744;NM_001005214,NM_001005214;NR_026744	hyperM.iPSC
1	163934805	163934973	2	cg11373746,cg04084052	TSS1500,TSS1500	S_Shore,S_Shore	ALDH9A1,ALDH9A1	NM_000696,NM_000696	hyperM.iPSC
1	164306068	164306482	4	cg21908886,cg27519145,cg03421657,cg02456804	3'UTR,Body,Body,Body	_,_	FAM78B,FAM78B,FAM78B,FAM78B	NM_001017961,NM_001017961,NM_001017961,NM_001017961	hyperM.iPSC
1	164390730	164391527	2	cg17940268,cg24554839	TSS200;Body,TSS1500;Body	_,_	MIR921;FAM78B,MIR921;FAM78B	NR_030626;NM_001017961,NR_030626;NM_001017961	hyperM.iPSC
1	164403131	164403563	4	cg16118529,cg14153737,cg19708554,cg03272326	TSS1500,TSS1500,TSS1500,TSS1500	S_Shore,S_Shore,S_Shore,S_Shore	FAM78B,FAM78B,FAM78B,FAM78B	NM_001017961,NM_001017961,NM_001017961,NM_001017961	hyperM.iPSC
1	165112632	165112650	2	cg26870903,cg20672205	TSS1500,TSS1500	S_Shore,S_Shore	TADA1,TADA1	NM_053053,NM_053053	hyperM.iPSC
1	165183782	165183891	2	cg04093225,cg09259179	Body,Body	Island,S_Shore	ILDR2,ILDR2	NM_199351,NM_199351	hyperM.iPSC
1	165330205	165330715	2	cg01598007,cg13179074	TSS1500,1stExon	_,_	DUSP27,DUSP27	NM_001080426,NM_001080426	hyperM.iPSC
1	165675678	165675760	2	cg06900257,cg12184421	Body;Body,Body;Body	Island,Island	CD247;CD247,CD247;CD247	NM_198053;NM_000734,NM_198053;NM_000734	hyperM.iPSC
1	165776542	165777463	2	cg24693760,cg26607897	_,3'UTR	_,_	_,CREG1	_,NM_003851	hyperM.iPSC
1	165957062	165957350	2	cg04846203,cg01565130	TSS1500;TSS1500;TSS1500,TSS1500;TSS1500;TSS1500	N_Shore,N_Shore	MPZL1;MPZL1;MPZL1,MPZL1;MPZL1;MPZL1	NM_024569;NM_003953;NM_001146191,NM_024569;NM_003953;NM_001146191	hyperM.iPSC
1	166170908	166171299	2	cg12749559,cg25130277	Body;Body;Body,TSS1500;Body;Body;TSS1500;Body	N_Shore,N_Shore	BRP44;BRP44;BRP44,DCAF6;BRP44;BRP44;DCAF6;BRP44	NR_026550;NM_015415;NM_001143674,NM_018442;NR_026550;NM_015415;NM_001017977;NM_001143674	hyperM.iPSC
1	166463282	166463822	2	cg10625365,cg08738280	Body,Body	S_Shore,S_Shore	SFT2D2,SFT2D2	NM_199344,NM_199344	hyperM.iPSC
1	166964973	166965103	3	cg26220985,cg09922481,cg21266845	1stExon,TSS200,TSS200	_,_	DPT,DPT,DPT	NM_001937,NM_001937,NM_001937	hyperM.iPSC
1	167822305	167822646	2	cg24673322,cg16054275	5'UTR;1stExon,TSS1500	_,_	F5;F5,F5	NM_000130;NM_000130,NM_000130	hyperM.iPSC
1	167969465	167969856	2	cg06093460,cg16660677	5'UTR,TSS200	_,_	SELE,SELE	NM_000450,NM_000450	hyperM.iPSC
1	168381666	168381975	2	cg12500707,cg03192897	TSS200,1stExon	_,_	METTL11B,METTL11B	NM_001136107,NM_001136107	hypoM.iPSC
1	168895672	168897021	5	cg11953609,cg06926146,cg22795586,cg22797031,cg03760589	_,_	N_Shore,N_Shore,N_Shore,N_Shore,N_Shore	_,_	_,_	hypoM.iPSC
1	168905431	168905541	2	cg09010107,cg07957294	Body;Body,Body;Body	_,_	PRRX1;PRRX1,PRRX1;PRRX1	NM_022716;NM_006902,NM_022716;NM_006902	hypoM.iPSC
1	169421099	169421236	2	cg18375642,cg14721213	5'UTR;1stExon,5'UTR	_,_	FMO2;FMO2,FMO2	NM_001460;NM_001460,NM_001460	hyperM.iPSC
1	169493326	169493617	2	cg11192688,cg16034517	5'UTR,5'UTR	_,_	FMO1,FMO1	NM_002021,NM_002021	hyperM.iPSC
1	170380129	170381042	6	cg02633729,cg25214966,cg24002149,cg21450888,cg17178220,cg03322057	Body;Body,Body;Body;Body,Body;TSS200;Body,Body;Body;TSS1500,Body;Body;TSS1500,Body;Body;TSS1500	_,_	DNM3;DNM3,MIR199A2;DNM3;DNM3,DNM3;MIR199A2;DNM3,DNM3;DNM3;MIR199A2,DNM3;DNM3;MIR199A2,DNM3;DNM3;MIR199A2	NM_015569;NM_001136127,NR_029618;NM_015569;NM_001136127,NM_015569;NR_029618;NM_001136127,NM_015569;NM_001136127;NR_029618,NM_015569;NM_001136127;NR_029618,NM_015569;NM_001136127;NR_029618	hyperM.iPSC
1	170679972	170680235	2	cg10622825,cg08587864	TSS200;TSS200;Body,Body;TSS1500;TSS1500	S_Shore,S_Shore	PIGC;PIGC;C1orf105,C1orf105;PIGC;PIGC	NM_002642;NM_153747;NM_139240,NM_139240;NM_153747;NM_002642	hyperM.iPSC
1	171442989	171443146	3	cg21439763,cg26315984,cg10861599	5'UTR;1stExon,TSS200,TSS200	_,_	TNFSF4;TNFSF4,TNFSF4,TNFSF4	NM_003326;NM_003326,NM_003326,NM_003326	hyperM.iPSC
1	171711666	171712086	2	cg25302646,cg10963949	TSS1500,TSS1500	N_Shore,N_Shore	PRDX6,PRDX6	NM_004905,NM_004905	hyperM.iPSC
1	171905694	171906823	5	cg04446579,cg15680620,cg22529184,cg12525949,cg17267239	TSS200,TSS200,TSS1500,TSS1500,TSS1500	S_Shore,S_Shore,S_Shore,S_Shore,S_Shore	ANKRD45,ANKRD45,ANKRD45,ANKRD45,ANKRD45	NM_198493,NM_198493,NM_198493,NM_198493,NM_198493	hyperM.iPSC
1	173110377	173111113	4	cg02482603,cg04858586,cg13130398,cg07285983	TSS1500;Body,TSS1500;Body,TSS1500;Body,Body;TSS200	_,_	RABGAP1L;RABGAP1L,RABGAP1L;RABGAP1L,RABGAP1L;RABGAP1L,RABGAP1L;RABGAP1L	NM_001035230;NM_014857,NM_001035230;NM_014857,NM_001035230;NM_014857,NM_014857;NM_001035230	hypoM.iPSC
1	173200197	173201084	3	cg17516247,ch.1.173201044F,ch.1.173201084F	_,_	_,_	_,_	_,_	hyperM.iPSC
1	173979005	173979842	2	cg07107171,cg20933713	5'UTR;1stExon,TSS1500	_,_	TNR;TNR,TNR	NM_003285;NM_003285,NM_003285	hyperM.iPSC
1	174123404	174124442	4	cg22343877,cg15139452,cg19309488,cg05888252	_,_	_,_	_,_	_,_	hypoM.iPSC
1	175268416	175268526	2	cg25104727,cg18865685	Body;Body,Body;Body	_,_	ASTN1;ASTN1,ASTN1;ASTN1	NM_207108;NM_004319,NM_207108;NM_004319	hyperM.iPSC
1	175492473	175492511	3	cg01931994,cg19315261,cg26272214	Body,Body,Body	_,_	FAM5B,FAM5B,FAM5B	NM_021165,NM_021165,NM_021165	hyperM.iPSC
1	176722423	176722893	3	cg21033965,cg09938479,cg26915952	_,_	Island,Island,Island	_,_	_,_	hyperM.iPSC
1	177259629	177260321	2	cg10785394,cg10887069	_,TSS1500	N_Shore,N_Shore	_,FAM20B	_,NM_014864	hyperM.iPSC
1	177786804	177787708	2	cg20746459,cg08037922	Body;Body;3'UTR,Body;Body;Body	_,_	C1orf125;C1orf125;NPHS2,C1orf125;C1orf125;NPHS2	NM_182766;NM_144696;NM_014625,NM_182766;NM_144696;NM_014625	hyperM.iPSC
1	177823844	177824403	3	cg03986311,cg26328954,cg15642933	_,_	S_Shore,S_Shore,N_Shelf	_,_	_,_	hyperM.iPSC
1	177826744	177828123	7	cg23627040,cg13848905,cg07901138,cg07171496,cg12277666,cg15545772,cg09656934	TSS1500,TSS1500,TSS1500,TSS1500,TSS200,5'UTR;1stExon,5'UTR	N_Shore,N_Shore,Island,Island,Island,Island,Island	TDRD5,TDRD5,TDRD5,TDRD5,TDRD5,TDRD5;TDRD5,TDRD5	NM_173533,NM_173533,NM_173533,NM_173533,NM_173533,NM_173533;NM_173533,NM_173533	hyperM.iPSC
1	177963334	177963437	2	cg21295678,cg15209440	_,_	_,_	_,_	_,_	hyperM.iPSC
1	177980411	177980573	3	cg14748380,cg24460126,cg21363811	5'UTR,5'UTR,5'UTR	Island,Island,Island	FAM163A,FAM163A,FAM163A	NM_173509,NM_173509,NM_173509	hypoM.iPSC
1	178738830	178738977	3	cg08270031,cg16690456,cg20824549	TSS200,TSS1500,TSS1500	Island,S_Shore,S_Shore	ACBD6,ACBD6,ACBD6	NM_032360,NM_032360,NM_032360	hyperM.iPSC
1	179189259	179190470	7	cg17237951,cg27473416,cg00579423,cg03058232,cg22776392,cg14027288,cg18114294	_,_	N_Shore,Island,Island,Island,Island,Island,S_Shore	_,_	_,_	hyperM.iPSC
1	179269599	179269826	3	cg24441127,cg07025274,cg23037321	TSS200,TSS200,1stExon	_,_	MR1,MR1,MR1	NM_001531,NM_001531,NM_001531	hyperM.iPSC
1	179649470	179649557	2	cg13191195,cg25305993	_,_	Island,S_Shore	_,_	_,_	hyperM.iPSC
1	179720787	179721758	2	cg10573505,cg01363596	Body,Body	N_Shore,Island	CACNA1E,CACNA1E	NM_000721,NM_000721	hyperM.iPSC
1	179744772	179744784	2	cg03117487,cg24611232	Body,Body	_,_	CACNA1E,CACNA1E	NM_000721,NM_000721	hyperM.iPSC
1	180292667	180294169	5	cg19866866,cg16306900,cg11478051,cg08918923,cg17936783	Body,Body,Body,5'UTR,5'UTR	Island,Island,Island,S_Shore,S_Shore	ZNF648,ZNF648,ZNF648,ZNF648,ZNF648	NM_001009992,NM_001009992,NM_001009992,NM_001009992,NM_001009992	hyperM.iPSC
1	180837797	180838776	2	cg05395321,cg06875985	Body,Body	N_Shelf,N_Shore	RGS16,RGS16	NM_002928,NM_002928	hyperM.iPSC
1	180839778	180840612	3	cg16824301,cg02688760,cg03517466	Body,TSS200,TSS1500	N_Shore,Island,S_Shore	RGS16,RGS16,RGS16	NM_002928,NM_002928,NM_002928	hyperM.iPSC
1	181188311	181189328	4	cg13112404,cg08787039,cg26679785,cg02721693	Body,Body,1stExon,TSS200	N_Shore,Island,Island,S_Shore	C1orf14,C1orf14,C1orf14,C1orf14	NM_030933,NM_030933,NM_030933,NM_030933	hyperM.iPSC
1	181275363	181275970	2	cg17223218,cg12689670	Body,Body	_,_	LAMC1,LAMC1	NM_002293,NM_002293	hyperM.iPSC
1	181421679	181422267	5	cg05366923,cg01949993,cg05929019,cg04218899,cg23696949	TSS200;TSS200,TSS200;TSS200,TSS200;TSS200,1stExon;5'UTR;5'UTR;1stExon,Body;Body	_,_	LAMC2;LAMC2,LAMC2;LAMC2,LAMC2;LAMC2,LAMC2;LAMC2;LAMC2;LAMC2,LAMC2;LAMC2	NM_018891;NM_005562,NM_018891;NM_005562,NM_018891;NM_005562,NM_018891;NM_018891;NM_005562;NM_005562,NM_005562;NM_018891	hypoM.iPSC
1	181454056	181454920	2	cg01417625,cg08905629	Body;Body,Body;Body	_,_	LAMC2;LAMC2,LAMC2;LAMC2	NM_005562;NM_018891,NM_005562;NM_018891	hyperM.iPSC
1	181655355	181655788	2	cg15977933,cg18116641	TSS1500,TSS1500	S_Shore,S_Shore	NMNAT2,NMNAT2	NM_015039,NM_015039	hyperM.iPSC
1	181888630	181889093	2	cg20579480,cg19264170	5'UTR;5'UTR,TSS200;5'UTR	_,_	APOBEC4;RGL1,APOBEC4;RGL1	NM_203454;NM_015149,NM_203454;NM_015149	hyperM.iPSC
1	182273556	182273595	2	cg00044463,cg02314308	TSS200,TSS200	S_Shore,S_Shore	GLT25D2,GLT25D2	NM_015101,NM_015101	hyperM.iPSC
1	183280281	183280887	3	cg16597665,cg11320084,cg26542888	TSS1500,TSS1500,TSS1500	N_Shore,N_Shore,N_Shore	RNF2,RNF2,RNF2	NM_007212,NM_007212,NM_007212	hyperM.iPSC
1	183553619	183553771	2	cg05377162,cg17297305	TSS1500,TSS1500	S_Shore,S_Shore	IVNS1ABP,IVNS1ABP	NM_006469,NM_006469	hyperM.iPSC
1	191421831	191422429	3	cg12859046,cg16608652,cg00725635	5'UTR;1stExon;Body,5'UTR;1stExon;Body,TSS200;Body	_,_	B3GALT2;B3GALT2;CDC73,B3GALT2;B3GALT2;CDC73,B3GALT2;CDC73	NM_003783;NM_003783;NM_024529,NM_003783;NM_003783;NM_024529,NM_003783;NM_024529	hyperM.iPSC
1	195132309	195133135	3	cg23673761,cg20784841,cg10627839	Body,Body,Body	_,_	CFHR4,CFHR4,CFHR4	NM_006684,NM_006684,NM_006684	hyperM.iPSC
1	195212153	195213135	3	cg25840094,cg21475781,cg13682187	TSS1500,TSS1500,TSS200	_,_	CFHR5,CFHR5,CFHR5	NM_030787,NM_030787,NM_030787	hyperM.iPSC
1	195503742	195503880	2	cg13940125,cg01258789	TSS1500,TSS200	_,_	CRB1,CRB1	NM_201253,NM_201253	hyperM.iPSC
1	196157102	196157435	2	cg12434982,cg26816907	Body;Body,Body;Body	Island,Island	LHX9;LHX9,LHX9;LHX9	NM_020204;NM_001014434,NM_020204;NM_001014434	hypoM.iPSC
1	197983913	197984087	2	cg22607266,cg12664749	_,_	_,_	_,_	_,_	hypoM.iPSC
1	198272456	198272870	2	cg07926895,cg13229857	Body;Body,Body;Body	S_Shore,S_Shore	NR5A2;NR5A2,NR5A2;NR5A2	NM_205860;NM_003822,NM_205860;NM_003822	hypoM.iPSC
1	198274026	198274486	3	cg04605987,cg04308769,cg21851672	Body;Body,Body;Body,Body;Body	N_Shore,N_Shore,N_Shore	NR5A2;NR5A2,NR5A2;NR5A2,NR5A2;NR5A2	NM_205860;NM_003822,NM_205860;NM_003822,NM_205860;NM_003822	hypoM.iPSC
1	199109379	199109513	2	cg15892784,cg13300273	1stExon,1stExon	Island,Island	GPR25,GPR25	NM_005298,NM_005298	hyperM.iPSC
1	199127877	199128220	2	cg06854264,cg16409409	Body,Body	S_Shore,S_Shore	C1orf106,C1orf106	NM_018265,NM_018265	hypoM.iPSC
1	199259823	199260332	3	cg12587954,cg21218687,cg26252592	TSS1500,TSS1500,TSS1500	S_Shore,S_Shore,S_Shore	KIF21B,KIF21B,KIF21B	NM_017596,NM_017596,NM_017596	hypoM.iPSC
1	199390542	199390648	3	cg05391486,cg23929317,cg21431091	TSS1500,TSS1500,TSS1500	S_Shore,S_Shore,S_Shore	TMEM9,TMEM9,TMEM9	NM_016456,NM_016456,NM_016456	hyperM.iPSC
1	199461836	199462770	2	cg00578673,cg04258973	Body,Body	N_Shore,Island	IGFN1,IGFN1	NM_001164586,NM_001164586	hyperM.iPSC
1	199518823	199520594	8	cg12611449,cg02855983,cg08872722,cg17463149,cg09279512,cg20869257,cg09009380,cg04904030	TSS1500;TSS1500,TSS1500;TSS1500,TSS1500;TSS1500,TSS200;TSS200,TSS200;TSS200,1stExon;1stExon,1stExon;1stExon,Body;Body	N_Shore,N_Shore,N_Shore,Island,Island,Island,Island,S_Shore	PKP1;PKP1,PKP1;PKP1,PKP1;PKP1,PKP1;PKP1,PKP1;PKP1,PKP1;PKP1,PKP1;PKP1,PKP1;PKP1	NM_000299;NM_001005337,NM_000299;NM_001005337,NM_000299;NM_001005337,NM_000299;NM_001005337,NM_000299;NM_001005337,NM_000299;NM_001005337,NM_000299;NM_001005337,NM_000299;NM_001005337	hyperM.iPSC
1	199612772	199613499	3	cg00003287,cg18330203,cg19233001	5'UTR;5'UTR;5'UTR;5'UTR,5'UTR;5'UTR;5'UTR;5'UTR,TSS200;TSS200;TSS200;TSS200	_,_	TNNT2;TNNT2;TNNT2;TNNT2,TNNT2;TNNT2;TNNT2;TNNT2,TNNT2;TNNT2;TNNT2;TNNT2	NM_001001431;NM_001001430;NM_001001432;NM_000364,NM_001001431;NM_001001430;NM_001001432;NM_000364,NM_000364;NM_001001430;NM_001001432;NM_001001431	hypoM.iPSC
1	199635537	199635654	2	cg23291161,cg26539023	TSS1500,TSS1500	Island,Island	LAD1,LAD1	NM_005558,NM_005558	hypoM.iPSC
1	199656829	199658370	4	cg13435855,cg12114524,cg07236127,cg13172153	5'UTR,5'UTR,TSS1500,TSS1500	_,_	TNNI1,TNNI1,TNNI1,TNNI1	NM_003281,NM_003281,NM_003281,NM_003281	hyperM.iPSC
1	199692613	199692913	2	cg02897366,cg25361506	_,_	_,_	_,_	_,_	hyperM.iPSC
1	199742428	199743242	3	cg04772818,cg16357582,cg24155190	5'UTR;5'UTR,TSS200;TSS200,TSS1500;TSS1500	N_Shore,S_Shore,S_Shore	CSRP1;CSRP1,CSRP1;CSRP1,CSRP1;CSRP1	NM_004078;NM_001144773,NM_001144773;NM_004078,NM_001144773;NM_004078	hyperM.iPSC
1	199975145	199976298	7	cg27441486,cg14168733,cg13877974,cg01828733,cg14377596,cg05091570,cg18539461	TSS1500;Body,TSS1500;Body,TSS200;Body,TSS200;Body,1stExon;Body;5'UTR,Body;Body,Body;Body	N_Shore,N_Shore,Island,Island,Island,Island,S_Shore	NAV1;NAV1,NAV1;NAV1,NAV1;NAV1,NAV1;NAV1,NAV1;NAV1;NAV1,NAV1;NAV1,NAV1;NAV1	NM_001167738;NM_020443,NM_001167738;NM_020443,NM_001167738;NM_020443,NM_001167738;NM_020443,NM_001167738;NM_020443;NM_001167738,NM_001167738;NM_020443,NM_001167738;NM_020443	hypoM.iPSC
1	200246122	200246561	5	cg26808687,cg05653018,cg16986578,cg26328757,cg02076020	TSS200;TSS200,TSS200;TSS200,TSS200;TSS200,5'UTR;5'UTR;1stExon;1stExon,5'UTR;5'UTR;1stExon	_,_	ELF3;ELF3,ELF3;ELF3,ELF3;ELF3,ELF3;ELF3;ELF3;ELF3,ELF3;ELF3;ELF3	NM_004433;NM_001114309,NM_004433;NM_001114309,NM_004433;NM_001114309,NM_004433;NM_001114309;NM_004433;NM_001114309,NM_004433;NM_001114309;NM_001114309	hypoM.iPSC
1	200342169	200343115	2	cg22851694,cg04896437	_,_	_,_	_,_	_,_	hyperM.iPSC
1	200358491	200358556	3	cg13300939,cg17219660,cg02124912	TSS200,TSS200,TSS200	_,_	GPR37L1,GPR37L1,GPR37L1	NM_004767,NM_004767,NM_004767	hypoM.iPSC
1	200395305	200395878	4	cg00903584,cg19675731,cg16266227,cg22008490	5'UTR;5'UTR;1stExon,TSS200;5'UTR,TSS200;5'UTR,TSS200;5'UTR	_,_	PTPN7;PTPN7;PTPN7,PTPN7;PTPN7,PTPN7;PTPN7,PTPN7;PTPN7	NM_080588;NM_002832;NM_080588,NM_080588;NM_002832,NM_080588;NM_002832,NM_080588;NM_002832	hyperM.iPSC
1	201322045	201322130	2	cg10901806,cg23098069	TSS200,TSS200	_,_	MYOG,MYOG	NM_002479,NM_002479	hyperM.iPSC
1	201362370	201363306	5	cg24141663,cg11341981,cg01133446,cg07232945,cg03547181	TSS1500;TSS1500,TSS1500;TSS1500,TSS1500;TSS1500,TSS1500;TSS1500,TSS200;TSS200	N_Shore,N_Shore,N_Shore,N_Shore,N_Shore	ADORA1;ADORA1,ADORA1;ADORA1,ADORA1;ADORA1,ADORA1;ADORA1,ADORA1;ADORA1	NM_000674;NM_001048230,NM_000674;NM_001048230,NM_000674;NM_001048230,NM_000674;NM_001048230,NM_000674;NM_001048230	hyperM.iPSC
1	201586813	201587164	5	cg04704856,cg03764585,cg26987645,cg16289210,cg27387030	1stExon;5'UTR,1stExon;5'UTR,TSS200,TSS200,TSS1500	_,_	FMOD;FMOD,FMOD;FMOD,FMOD,FMOD,FMOD	NM_002023;NM_002023,NM_002023;NM_002023,NM_002023,NM_002023,NM_002023	hyperM.iPSC
1	201731700	201731984	2	cg23031141,cg04830316	5'UTR,Body	_,_	OPTC,OPTC	NM_014359,NM_014359	hyperM.iPSC
1	201861671	201861768	3	cg06637618,cg21693907,cg17039022	TSS1500;TSS1500,TSS1500;TSS1500,TSS1500;TSS1500	N_Shelf,N_Shelf,N_Shelf	ATP2B4;ATP2B4,ATP2B4;ATP2B4,ATP2B4;ATP2B4	NM_001001396;NM_001684,NM_001001396;NM_001684,NM_001001396;NM_001684	hyperM.iPSC
1	202000879	202001182	4	cg10117369,cg17711527,cg12022621,cg00942920	TSS200;TSS200,1stExon;1stExon;5'UTR;5'UTR,1stExon;1stExon;5'UTR,Body;1stExon;5'UTR	_,_	LAX1;LAX1,LAX1;LAX1;LAX1;LAX1,LAX1;LAX1;LAX1,LAX1;LAX1;LAX1	NM_017773;NM_001136190,NM_017773;NM_001136190;NM_001136190;NM_017773,NM_017773;NM_001136190;NM_017773,NM_001136190;NM_017773;NM_017773	hyperM.iPSC
1	202034195	202035140	3	cg06521359,cg04498511,cg04902405	5'UTR,5'UTR,5'UTR	S_Shelf,S_Shelf,S_Shelf	ZC3H11A,ZC3H11A,ZC3H11A	NM_014827,NM_014827,NM_014827	hyperM.iPSC
1	202096398	202096513	2	cg06642677,cg15481791	TSS1500,TSS1500	N_Shore,N_Shore	SNRPE,SNRPE	NM_003094,NM_003094	hyperM.iPSC
1	202277262	202278084	3	cg19366877,cg16290101,cg01980854	TSS1500,TSS1500,TSS1500	_,_	C1orf157,C1orf157,C1orf157	NR_027902,NR_027902,NR_027902	hyperM.iPSC
1	202401866	202402208	2	cg05556020,cg21537214	Body,TSS200	_,_	REN,REN	NM_000537,NM_000537	hyperM.iPSC
1	202426455	202427116	2	cg26665891,cg08530008	Body,Body	Island,S_Shore	KISS1,KISS1	NM_002256,NM_002256	hyperM.iPSC
1	202493189	202493364	2	cg17108388,cg02491234	Body,Body	Island,Island	PLEKHA6,PLEKHA6	NM_014935,NM_014935	hyperM.iPSC
1	202595627	202595845	4	cg06807117,cg09085216,cg24864241,cg26895569	5'UTR;1stExon,TSS200,TSS200,TSS200	_,_	PLEKHA6;PLEKHA6,PLEKHA6,PLEKHA6,PLEKHA6	NM_014935;NM_014935,NM_014935,NM_014935,NM_014935	hyperM.iPSC
1	203223014	203223021	2	cg20290360,cg20000132	Body;Body;Body;Body,Body;Body;Body;Body	_,_	NFASC;NFASC;NFASC;NFASC,NFASC;NFASC;NFASC;NFASC	NM_001005388;NM_001160331;NM_015090;NM_001160332,NM_001005388;NM_001160331;NM_015090;NM_001160332	hyperM.iPSC
1	203232820	203232858	3	cg17947172,cg04862289,cg17449235	Body;Body;Body;Body,Body;Body;Body;Body,Body;Body;Body;Body	_,_	NFASC;NFASC;NFASC;NFASC,NFASC;NFASC;NFASC;NFASC,NFASC;NFASC;NFASC;NFASC	NM_001005388;NM_001160331;NM_015090;NM_001160332,NM_001005388;NM_001160331;NM_015090;NM_001160332,NM_001005388;NM_001160331;NM_015090;NM_001160332	hyperM.iPSC
1	203277885	203278529	2	cg03537215,cg06906555	TSS1500,TSS1500	_,_	CNTN2,CNTN2	NM_005076,NM_005076	hyperM.iPSC
1	203592482	203593677	3	cg27529555,cg08159989,cg24692170	5'UTR;1stExon,TSS200,TSS1500	_,_	KLHDC8A;KLHDC8A,KLHDC8A,KLHDC8A	NM_018203;NM_018203,NM_018203,NM_018203	hyperM.iPSC
1	203608973	203609757	2	cg18759595,cg07342108	_,_	_,_	_,_	_,_	hyperM.iPSC
1	203684059	203684901	3	cg02999711,cg25202407,cg02520707	Body,TSS200,TSS1500	_,_	MIR135B,MIR135B,MIR135B	NR_029893,NR_029893,NR_029893	hypoM.iPSC
1	203689060	203689886	2	cg12656740,cg00466402	_,_	N_Shelf,N_Shore	_,_	_,_	hyperM.iPSC
1	203765153	203765978	3	cg06419732,cg07008784,cg26400546	Body;Body;Body,Body;Body;Body,Body;Body;Body	Island,Island,S_Shore	CDK18;CDK18;CDK18,CDK18;CDK18;CDK18,CDK18;CDK18;CDK18	NM_002596;NM_212502;NM_212503,NM_002596;NM_212502;NM_212503,NM_002596;NM_212502;NM_212503	hyperM.iPSC
1	203803444	203804460	4	cg04198912,cg07121199,cg03061435,cg03585778	TSS1500,TSS1500,TSS1500,TSS1500	N_Shore,Island,Island,Island	MFSD4,MFSD4,MFSD4,MFSD4	NM_181644,NM_181644,NM_181644,NM_181644	hyperM.iPSC
1	203816771	203817292	2	cg16035777,cg25600410	Body,Body	_,_	MFSD4,MFSD4	NM_181644,NM_181644	hyperM.iPSC
1	204085107	204086086	2	cg03461704,cg07167872	Body,TSS200	N_Shore,S_Shore	PM20D1,PM20D1	NM_152491,NM_152491	hyperM.iPSC
1	204709924	204710000	3	cg16619193,cg26859016,cg20530056	TSS1500,TSS1500,TSS1500	_,_	IKBKE,IKBKE,IKBKE	NM_014002,NM_014002,NM_014002	hyperM.iPSC
1	204737804	204738031	2	cg05226740,cg13402865	_,_	_,_	_,_	_,_	hyperM.iPSC
1	204796743	204798239	4	cg21218864,cg22871559,cg22401939,cg25593159	Body;TSS1500;Body,Body;TSS1500;Body,Body;Body;Body,Body;Body;Body	N_Shore,N_Shore,S_Shore,S_Shore	RASSF5;RASSF5;RASSF5,RASSF5;RASSF5;RASSF5,RASSF5;RASSF5;RASSF5,RASSF5;RASSF5;RASSF5	NM_182663;NM_182665;NM_182664,NM_182663;NM_182665;NM_182664,NM_182663;NM_182665;NM_182664,NM_182663;NM_182665;NM_182664	hyperM.iPSC
1	204874003	204874873	3	cg19778776,cg09328024,cg18759190	TSS1500;TSS1500,TSS1500;TSS1500,TSS1500;TSS1500	N_Shore,N_Shore,N_Shore	DYRK3;DYRK3,DYRK3;DYRK3,DYRK3;DYRK3	NM_001004023;NM_003582,NM_001004023;NM_003582,NM_001004023;NM_003582	hyperM.iPSC
1	205011969	205012547	2	cg17067005,cg10978799	Body,TSS200	_,_	IL10,IL10	NM_000572,NM_000572	hyperM.iPSC
1	205037818	205038753	4	cg12380764,cg07175580,cg20998511,cg11582579	TSS1500,TSS1500,TSS200,TSS200	_,_	IL19,IL19,IL19,IL19	NM_153758,NM_153758,NM_153758,NM_153758	hyperM.iPSC
1	205161776	205161955	3	cg06640279,cg15158847,cg24107163	Body;Body;Body,5'UTR;5'UTR;1stExon;1stExon;5'UTR,5'UTR;5'UTR;1stExon;1stExon;5'UTR	_,_	FAIM3;FAIM3;FAIM3,FAIM3;FAIM3;FAIM3;FAIM3;FAIM3,FAIM3;FAIM3;FAIM3;FAIM3;FAIM3	NM_001142473;NM_001142472;NM_005449,NM_001142472;NM_005449;NM_001142473;NM_005449;NM_001142473,NM_001142472;NM_005449;NM_001142473;NM_005449;NM_001142473	hyperM.iPSC
1	205207494	205207550	2	cg15565057,cg21115691	Body;Body;Body;Body,Body;Body;Body;Body	_,_	FCAMR;FCAMR;FCAMR;FCAMR,FCAMR;FCAMR;FCAMR;FCAMR	NM_001122980;NM_001122979;NM_032029;NM_001170631,NM_001122980;NM_001122979;NM_032029;NM_001170631	hyperM.iPSC
1	205291172	205291190	2	cg11829608,cg23921459	TSS200,TSS200	N_Shore,N_Shore	YOD1,YOD1	NM_018566,NM_018566	hypoM.iPSC
1	205735947	205735957	2	cg17147317,cg05922028	TSS200;TSS200,TSS200;TSS200	N_Shore,N_Shore	CR1;CR1,CR1;CR1	NM_000573;NM_000651,NM_000573;NM_000651	hypoM.iPSC
1	206106826	206106876	2	cg00085493,cg24315421	_,_	N_Shore,N_Shore	_,_	_,_	hyperM.iPSC
1	206150536	206151666	4	cg04197452,cg03990033,cg16291276,cg26266618	Body;Body,Body;Body,Body;Body,TSS1500;TSS1500	N_Shore,N_Shore,N_Shore,S_Shore	CD34;CD34,CD34;CD34,CD34;CD34,CD34;CD34	NM_001025109;NM_001773,NM_001025109;NM_001773,NM_001025109;NM_001773,NM_001773;NM_001025109	hyperM.iPSC
1	206199213	206199739	3	cg10236452,cg10210594,cg15770106	_,_	Island,Island,Island	_,_	_,_	hypoM.iPSC
1	207470409	207470500	2	ch.1.207470409R,ch.1.207470500F	_,_	N_Shore,N_Shore	_,_	_,_	hyperM.iPSC
1	207471673	207472686	3	cg11379081,cg00563824,cg15817705	_,_	Island,Island,S_Shore	_,_	_,_	hyperM.iPSC
1	207594158	207594204	2	cg24997231,cg06155620	_,_	_,_	_,_	_,_	hyperM.iPSC
1	207637572	207638512	2	cg22787719,cg12697139	_,_	_,_	_,_	_,_	hyperM.iPSC
1	207865344	207865976	2	cg05812804,cg26294229	Body;Body;Body,Body;Body;Body	N_Shore,Island	LAMB3;LAMB3;LAMB3,LAMB3;LAMB3;LAMB3	NM_001017402;NM_001127641;NM_000228,NM_001017402;NM_001127641;NM_000228	hyperM.iPSC
1	207944564	207944801	3	cg26880525,cg09366519,cg20941184	5'UTR;TSS1500,5'UTR;TSS1500,5'UTR;TSS200	_,_	HSD11B1;HSD11B1,HSD11B1;HSD11B1,HSD11B1;HSD11B1	NM_181755;NM_005525,NM_181755;NM_005525,NM_181755;NM_005525	hyperM.iPSC
1	207995518	207996750	5	cg08655071,cg20694619,cg22436753,cg01997629,cg00450164	TSS1500,TSS200,1stExon;5'UTR,1stExon;5'UTR,5'UTR	_,_	TRAF3IP3,TRAF3IP3,TRAF3IP3;TRAF3IP3,TRAF3IP3;TRAF3IP3,TRAF3IP3	NM_025228,NM_025228,NM_025228;NM_025228,NM_025228;NM_025228,NM_025228	hyperM.iPSC
1	208023188	208023573	2	cg00638574,cg03450180	Body,Body	N_Shore,N_Shore	C1orf74,C1orf74	NM_152485,NM_152485	hyperM.iPSC
1	208024785	208024966	2	cg08541772,cg06375148	TSS1500,TSS1500	Island,S_Shore	C1orf74,C1orf74	NM_152485,NM_152485	hyperM.iPSC
1	208476950	208477687	2	cg04839207,cg11071682	5'UTR,5'UTR	S_Shelf,S_Shelf	SERTAD4,SERTAD4	NM_019605,NM_019605	hyperM.iPSC
1	208492475	208492981	3	cg18272538,cg16658180,cg10717691	_,_	_,_	_,_	_,_	hypoM.iPSC
1	209566261	209566568	3	cg10177528,cg01780943,cg09139451	TSS1500;TSS1500,TSS1500;TSS1500,TSS200;TSS1500	N_Shore,N_Shore,N_Shore	TRAF5;TRAF5,TRAF5;TRAF5,TRAF5;TRAF5	NM_004619;NM_001033910,NM_004619;NM_001033910,NM_004619;NM_001033910	hyperM.iPSC
1	209718899	209719364	3	cg06640630,cg14264194,cg23358886	3'UTR;3'UTR,Body;Body,Body;Body	N_Shore,Island,Island	RD3;RD3,RD3;RD3,RD3;RD3	NM_183059;NM_001164688,NM_183059;NM_001164688,NM_183059;NM_001164688	hyperM.iPSC
1	209732752	209733075	4	cg00658007,cg04923746,cg06753273,cg24484971	1stExon;5'UTR;1stExon;5'UTR,TSS200;TSS200,TSS200;TSS200,TSS200;TSS200	_,_	RD3;RD3;RD3;RD3,RD3;RD3,RD3;RD3,RD3;RD3	NM_001164688;NM_001164688;NM_183059;NM_183059,NM_001164688;NM_183059,NM_001164688;NM_183059,NM_001164688;NM_183059	hyperM.iPSC
1	209755085	209755268	2	cg17043722,cg04362907	_,_	Island,Island	_,_	_,_	hyperM.iPSC
1	209938785	209939276	2	cg04792270,cg23652484	_,_	_,_	_,_	_,_	hypoM.iPSC
1	210071091	210071427	2	cg26659410,cg08892386	TSS1500,TSS1500	S_Shore,S_Shore	LPGAT1,LPGAT1	NM_014873,NM_014873	hyperM.iPSC
1	210671541	210671889	2	cg10487521,cg02783662	TSS1500;TSS1500,TSS1500;TSS1500	N_Shore,N_Shore	NENF;NENF,NENF;NENF	NM_013349;NR_026598,NM_013349;NR_026598	hypoM.iPSC
1	210672552	210673734	3	cg02901139,cg04894705,cg24511404	TSS1500;TSS1500,Body;Body,Body;Body	N_Shore,Island,S_Shore	NENF;NENF,NENF;NENF,NENF;NENF	NM_013349;NR_026598,NM_013349;NR_026598,NM_013349;NR_026598	hyperM.iPSC
1	210755040	210755070	2	cg14988680,cg11968804	_,_	Island,Island	_,_	_,_	hyperM.iPSC
1	210755539	210755620	3	cg18147098,cg10533103,cg23075506	_,_	S_Shore,S_Shore,S_Shore	_,_	_,_	hypoM.iPSC
1	210804927	210805226	2	cg18317154,cg04323713	TSS1500,TSS200	_,_	ATF3,ATF3	NM_001030287,NM_001030287	hyperM.iPSC
1	210886216	210886817	3	cg11810998,cg26223536,cg17222685	_,_	_,_	_,_	_,_	hyperM.iPSC
1	210940670	210940776	3	cg09952946,cg06150468,cg00168835	TSS1500,TSS1500,TSS1500	Island,S_Shore,S_Shore	BATF3,BATF3,BATF3	NM_018664,NM_018664,NM_018664	hyperM.iPSC
1	211156739	211156863	3	cg15130102,cg04607844,cg12596505	_,_	_,_	_,_	_,_	hyperM.iPSC
1	212219332	212221559	6	cg00668303,cg26054764,cg26933866,cg26926612,cg06177568,cg01659176	_,_	N_Shore,N_Shore,N_Shore,Island,N_Shore,N_Shore	_,_	_,_	hypoM.iPSC
1	212223649	212226233	12	cg00795024,cg00949753,cg07896717,cg23633547,cg01631319,cg07204874,cg06268921,cg23971069,cg10288510,cg18318878,cg20692998,cg01019971	_,_	N_Shore,N_Shore,N_Shore,N_Shore,N_Shore,N_Shore,N_Shore,N_Shore,Island,Island,N_Shore,N_Shore	_,_	_,_	hypoM.iPSC
1	212236535	212236864	4	cg16382030,cg22800590,cg17829746,cg25379954	Body,Body,Body,Body	_,_	PROX1,PROX1,PROX1,PROX1	NM_002763,NM_002763,NM_002763,NM_002763	hyperM.iPSC
1	213245281	213245839	5	cg13107973,cg22821560,cg02166981,cg14989033,cg00848374	TSS1500,TSS200,1stExon;5'UTR,1stExon;5'UTR,1stExon;5'UTR	_,_	KCNK2,KCNK2,KCNK2;KCNK2,KCNK2;KCNK2,KCNK2;KCNK2	NM_001017424,NM_001017424,NM_001017424;NM_001017424,NM_001017424;NM_001017424,NM_001017424;NM_001017424	hyperM.iPSC
1	215330130	215330470	4	cg24933127,cg11692820,cg07312357,cg25614875	TSS1500;TSS1500;5'UTR,TSS1500;TSS1500;5'UTR,TSS1500;TSS1500;5'UTR,TSS1500;TSS1500;5'UTR	S_Shore,S_Shore,S_Shore,S_Shore	ESRRG;ESRRG;ESRRG,ESRRG;ESRRG;ESRRG,ESRRG;ESRRG;ESRRG,ESRRG;ESRRG;ESRRG	NM_206594;NM_206595;NM_001134285,NM_206594;NM_206595;NM_001134285,NM_206594;NM_206595;NM_001134285,NM_206594;NM_206595;NM_001134285	hypoM.iPSC
1	215373323	215373386	2	cg04217177,cg00256046	5'UTR,5'UTR	N_Shore,N_Shore	ESRRG,ESRRG	NM_001134285,NM_001134285	hypoM.iPSC
1	215376191	215377195	6	cg09106903,cg25851789,cg12636169,cg09826050,cg03219968,cg04236178	5'UTR,5'UTR,5'UTR,5'UTR,5'UTR,5'UTR	N_Shore,N_Shore,N_Shore,N_Shore,N_Shore,N_Shore	ESRRG,ESRRG,ESRRG,ESRRG,ESRRG,ESRRG	NM_001134285,NM_001134285,NM_001134285,NM_001134285,NM_001134285,NM_001134285	hypoM.iPSC
1	215380322	215380907	3	cg23663428,cg13321105,cg00983697	_,_	S_Shore,S_Shelf,S_Shelf	_,_	_,_	hypoM.iPSC
1	216165109	216165216	2	cg00152577,cg24410255	_,_	_,_	_,_	_,_	hyperM.iPSC
1	216524505	216524643	2	cg13195486,cg12102320	TSS1500,TSS1500	N_Shore,Island	RRP15,RRP15	NM_016052,NM_016052	hyperM.iPSC
1	219116554	219118766	8	cg15469321,cg22616255,cg03901660,cg23647410,cg03329019,cg18645081,cg21878149,cg13170032	_,TSS1500,TSS1500,TSS1500	N_Shore,N_Shore,Island,N_Shore,N_Shore,N_Shore,Island,Island	_,HLX,HLX,HLX	_,NM_021958,NM_021958,NM_021958	hypoM.iPSC
1	219120527	219122587	13	cg21282663,cg02928365,cg22041228,cg20454002,cg22698272,cg12479878,cg19306970,cg02455346,cg07584855,cg04436994,cg14166284,cg09255910,cg17852326	Body,Body,Body,Body,Body,Body,Body,Body,Body,Body,Body,Body,Body	N_Shore,N_Shore,N_Shore,N_Shore,Island,Island,N_Shore,N_Shore,Island,Island,Island,Island,N_Shore	HLX,HLX,HLX,HLX,HLX,HLX,HLX,HLX,HLX,HLX,HLX,HLX,HLX	NM_021958,NM_021958,NM_021958,NM_021958,NM_021958,NM_021958,NM_021958,NM_021958,NM_021958,NM_021958,NM_021958,NM_021958,NM_021958	hypoM.iPSC
1	219123859	219124821	6	cg02743632,cg09515921,cg15450098,cg26440142,cg12053004,cg08655206	Body,Body,Body,Body,Body,3'UTR	N_Shore,Island,Island,Island,Island,S_Shore	HLX,HLX,HLX,HLX,HLX,HLX	NM_021958,NM_021958,NM_021958,NM_021958,NM_021958,NM_021958	hypoM.iPSC
1	219126037	219133311	15	cg01817019,cg07722657,cg23603194,cg21395577,cg26917694,cg06951677,cg16008148,cg25464265,cg07903237,cg26220673,cg24469980,cg08923271,cg26398921,cg22022798,cg18023943	_,_	N_Shore,N_Shore,N_Shore,Island,Island,S_Shore,S_Shore,N_Shore,N_Shore,N_Shore,Island,Island,Island,N_Shore,N_Shore	_,_	_,_	hypoM.iPSC
1	219134519	219136816	9	cg16137147,cg18788664,cg14315054,cg04539515,cg25001102,cg26047066,cg21680980,cg07241917,cg09140274	_,_	Island,Island,N_Shore,Island,Island,Island,S_Shore,S_Shore,S_Shore	_,_	_,_	hypoM.iPSC
1	219575690	219576425	3	cg03536711,cg13861948,cg25302985	Body,TSS200,TSS200	_,_	LOC400804,LOC400804,LOC400804	NR_024236,NR_024236,NR_024236	hyperM.iPSC
1	220694947	220695325	2	cg15078329,cg17836114	_,_	_,_	_,_	_,_	hyperM.iPSC
1	220787998	220788028	2	cg20582779,cg08942016	1stExon,1stExon;5'UTR	_,_	HHIPL2,HHIPL2;HHIPL2	NM_024746,NM_024746;NM_024746	hyperM.iPSC
1	221054468	221054740	2	cg22352176,cg02635260	_,_	N_Shore,N_Shore	_,_	_,_	hyperM.iPSC
1	221383380	221384088	3	cg07538512,cg04219417,cg07015886	TSS200,TSS1500,TSS1500	S_Shore,S_Shore,S_Shore	TLR5,TLR5,TLR5	NM_003268,NM_003268,NM_003268	hyperM.iPSC
1	221473633	221473718	2	cg14096207,cg25466245	Body,Body	_,_	SUSD4,SUSD4	NM_017982,NM_017982	hyperM.iPSC
1	221806064	221806680	2	cg06877247,cg25138649	Body,Body	N_Shelf,N_Shore	CAPN8,CAPN8	NM_001143962,NM_001143962	hyperM.iPSC
1	221955492	221955764	3	cg20266715,cg00792251,cg15033552	TSS1500,TSS1500,TSS200	_,_	CAPN2,CAPN2,CAPN2	NM_001146068,NM_001146068,NM_001146068	hyperM.iPSC
1	221966468	221966621	4	cg00339319,cg22697825,cg07629844,cg24150051	TSS1500;Body,TSS1500;Body,TSS200;Body,TSS200;Body	N_Shore,N_Shore,Island,Island	CAPN2;CAPN2,CAPN2;CAPN2,CAPN2;CAPN2,CAPN2;CAPN2	NM_001748;NM_001146068,NM_001748;NM_001146068,NM_001748;NM_001146068,NM_001748;NM_001146068	hyperM.iPSC
1	221970485	221970848	2	cg10100437,cg18310639	Body;Body,Body;Body	S_Shelf,S_Shelf	CAPN2;CAPN2,CAPN2;CAPN2	NM_001748;NM_001146068,NM_001748;NM_001146068	hyperM.iPSC
1	222002966	222003819	3	cg24047802,cg19318393,cg21167643	Body;Body,Body;Body,Body;Body	Island,Island,S_Shore	CAPN2;CAPN2,CAPN2;CAPN2,CAPN2;CAPN2	NM_001748;NM_001146068,NM_001748;NM_001146068,NM_001748;NM_001146068	hypoM.iPSC
1	222686657	222687402	2	cg04099562,cg01122889	Body;Body,Body;Body	N_Shore,N_Shore	WDR26;WDR26,WDR26;WDR26	NM_025160;NM_001115113,NM_025160;NM_001115113	hyperM.iPSC
1	223738485	223738527	2	cg16598244,cg12444822	_,_	_,_	_,_	_,_	hyperM.iPSC
1	223931733	223932110	3	cg16247183,cg14207589,cg01077274	_,_	Island,Island,S_Shore	_,_	_,_	hypoM.iPSC
1	224143292	224144860	3	cg23078948,cg00103855,cg12319004	1stExon,TSS1500,TSS1500	S_Shore,S_Shore,S_Shelf	LEFTY1,LEFTY1,LEFTY1	NM_020997,NM_020997,NM_020997	hypoM.iPSC
1	224178986	224179157	3	cg24361896,cg07049680,cg06939851	TSS1500,TSS1500,TSS1500	Island,Island,Island	PYCR2,PYCR2,PYCR2	NM_013328,NM_013328,NM_013328	hyperM.iPSC
1	224193736	224193913	2	cg06158434,cg27179622	Body,Body	Island,Island	LEFTY2,LEFTY2	NM_003240,NM_003240	hypoM.iPSC
1	224196104	224196447	3	cg22462235,cg20661303,cg20742696	TSS1500,TSS1500,TSS1500	S_Shore,S_Shore,S_Shelf	LEFTY2,LEFTY2,LEFTY2	NM_003240,NM_003240,NM_003240	hyperM.iPSC
1	224254101	224254499	3	cg11159091,cg04117530,cg13556548	TSS1500,TSS1500,TSS1500	S_Shore,S_Shore,S_Shore	C1orf55,C1orf55,C1orf55	NM_152608,NM_152608,NM_152608	hyperM.iPSC
1	224373513	224373856	2	cg22489204,cg00609227	_,_	N_Shelf,N_Shore	_,_	_,_	hyperM.iPSC
1	224381506	224382480	2	cg21690505,cg14162417	_,_	_,_	_,_	_,_	hyperM.iPSC
1	224564160	224564259	5	cg04439128,cg17985912,cg26199493,cg12962021,cg10778994	TSS1500,TSS1500,TSS1500,TSS1500,TSS1500	S_Shore,S_Shore,S_Shore,S_Shore,S_Shore	LIN9,LIN9,LIN9,LIN9,LIN9	NM_173083,NM_173083,NM_173083,NM_173083,NM_173083	hyperM.iPSC
1	224801378	224801683	2	cg00279700,cg01232909	_,TSS1500	N_Shore,N_Shore	_,C1orf95	_,NM_001003665	hyperM.iPSC
1	224892058	224892229	3	cg24544320,cg26917828,cg16177187	Body,Body,Body	_,N_Shelf	ITPKB,ITPKB,ITPKB	NM_002221,NM_002221,NM_002221	hyperM.iPSC
1	224957551	224957565	2	cg00194374,cg09580882	Body,Body	N_Shore,N_Shore	ITPKB,ITPKB	NM_002221,NM_002221	hyperM.iPSC
1	224990934	224991362	2	cg23717186,cg00279406	Body,Body	N_Shore,Island	ITPKB,ITPKB	NM_002221,NM_002221	hypoM.iPSC
1	224993950	224994611	3	cg13209122,cg03257293,cg19030737	TSS1500,TSS1500,TSS1500	S_Shore,S_Shore,S_Shore	ITPKB,ITPKB,ITPKB	NM_002221,NM_002221,NM_002221	hyperM.iPSC
1	225082079	225082647	3	cg16985288,cg20484086,cg01784507	_,_	_,_	_,_	_,_	hyperM.iPSC
1	225124669	225125528	2	cg20000641,cg26656022	TSS1500;TSS1500,5'UTR;5'UTR	Island,Island	PSEN2;PSEN2,PSEN2;PSEN2	NM_012486;NM_000447,NM_000447;NM_012486	hyperM.iPSC
1	225762562	225763314	2	cg10117562,cg06315347	_,_	S_Shore,S_Shelf	_,_	_,_	hyperM.iPSC
1	225812814	225815342	10	cg08111158,cg22344745,cg15594585,cg20011248,cg18947553,cg27056132,cg02736395,cg05053440,cg14789818,cg20699586	_,_	Island,Island,N_Shore,Island,Island,N_Shore,Island,Island,Island,Island	_,_	_,_	hyperM.iPSC
1	226029346	226029794	3	cg01426303,cg09867883,cg18592195	Body,Body,Body	_,_	SNAP47,SNAP47,SNAP47	NM_053052,NM_053052,NM_053052	hyperM.iPSC
1	226040800	226041268	3	cg21459583,cg00965168,cg06928246	_,_	N_Shore,Island,Island	_,_	_,_	hyperM.iPSC
1	226140258	226141120	2	cg01097408,cg11223365	_,_	N_Shore,N_Shore	_,_	_,_	hyperM.iPSC
1	226200852	226201046	2	cg01428095,cg24610866	Body,Body	N_Shore,Island	WNT9A,WNT9A	NM_003395,NM_003395	hyperM.iPSC
1	226262145	226262999	4	cg09316122,cg18642177,cg17318529,cg10019916	Body,Body,Body,Body	Island,Island,Island,Island	WNT3A,WNT3A,WNT3A,WNT3A	NM_033131,NM_033131,NM_033131,NM_033131	hyperM.iPSC
1	226313255	226315222	7	cg12359809,cg09075558,cg09511896,cg23663760,cg26841013,cg11176493,cg27546066	Body,Body,Body,Body,3'UTR,3'UTR,3'UTR	Island,Island,Island,Island,S_Shore,S_Shore,S_Shore	WNT3A,WNT3A,WNT3A,WNT3A,WNT3A,WNT3A,WNT3A	NM_033131,NM_033131,NM_033131,NM_033131,NM_033131,NM_033131,NM_033131	hyperM.iPSC
1	226358109	226358328	3	cg04078980,cg15720832,cg14925024	TSS1500,TSS1500,TSS1500	S_Shore,S_Shore,S_Shore	C1orf35,C1orf35,C1orf35	NM_024319,NM_024319,NM_024319	hyperM.iPSC
1	226360333	226361024	2	ch.1.226360333F,cg03432225	_,3'UTR;3'UTR;3'UTR;3'UTR;3'UTR;3'UTR;3'UTR;3'UTR	N_Shore,N_Shore	_,MRPL55;MRPL55;MRPL55;MRPL55;MRPL55;MRPL55;MRPL55;MRPL55	_,NM_181456;NM_181454;NM_181462;NM_181465;NM_181441;NM_181464;NM_181463;NM_181455	hyperM.iPSC
1	226404249	226404399	2	cg08228672,cg20848130	5'UTR;1stExon,5'UTR	_,_	GJC2;GJC2,GJC2	NM_020435;NM_020435,NM_020435	hyperM.iPSC
1	226461230	226462383	4	cg18329175,cg27394460,cg00251125,cg26940100	TSS1500;TSS1500,TSS1500;TSS1500,TSS1500;TSS1500,TSS200;TSS200	_,N_Shelf	OBSCN;OBSCN,OBSCN;OBSCN,OBSCN;OBSCN,OBSCN;OBSCN	NM_052843;NM_001098623,NM_052843;NM_001098623,NM_052843;NM_001098623,NM_052843;NM_001098623	hyperM.iPSC
1	226530672	226531017	3	cg13372766,cg04850211,cg05844789	Body;Body,Body;Body,Body;Body	Island,Island,Island	OBSCN;OBSCN,OBSCN;OBSCN,OBSCN;OBSCN	NM_052843;NM_001098623,NM_052843;NM_001098623,NM_052843;NM_001098623	hyperM.iPSC
1	226540404	226540496	2	cg11852843,cg13107669	Body;Body,Body;Body	N_Shore,Island	OBSCN;OBSCN,OBSCN;OBSCN	NM_052843;NM_001098623,NM_052843;NM_001098623	hyperM.iPSC
1	226561453	226561734	2	cg07382039,cg19746567	Body;Body,Body;Body	_,_	OBSCN;OBSCN,OBSCN;OBSCN	NM_052843;NM_001098623,NM_052843;NM_001098623	hyperM.iPSC
1	226568439	226569304	2	cg26362105,cg05048523	Body;Body,Body;Body	N_Shore,N_Shore	OBSCN;OBSCN,OBSCN;OBSCN	NM_052843;NM_001098623,NM_052843;NM_001098623	hyperM.iPSC
1	226615267	226615465	3	cg00901843,cg21407117,cg07922933	3'UTR;Body,3'UTR;Body,3'UTR;Body	S_Shore,S_Shore,S_Shore	OBSCN;OBSCN,OBSCN;OBSCN,OBSCN;OBSCN	NM_052843;NM_001098623,NM_052843;NM_001098623,NM_052843;NM_001098623	hyperM.iPSC
1	226701347	226701429	2	cg24070990,cg16894439	_,_	S_Shore,S_Shore	_,_	_,_	hypoM.iPSC
1	226719678	226719759	3	cg07101354,cg20411935,cg23239574	_,_	S_Shore,S_Shore,S_Shore	_,_	_,_	hyperM.iPSC
1	226724159	226724385	3	cg25622154,cg03569277,cg15033163	_,_	Island,N_Shore,N_Shore	_,_	_,_	hyperM.iPSC
1	226725596	226726022	2	cg00815832,cg21808258	_,_	Island,S_Shore	_,_	_,_	hyperM.iPSC
1	226727355	226728298	2	cg05373655,cg09791366	_,_	S_Shore,S_Shelf	_,_	_,_	hyperM.iPSC
1	226809310	226809858	2	cg27629454,cg12437277	_,_	N_Shore,Island	_,_	_,_	hyperM.iPSC
1	226937179	226937508	5	cg03145930,cg22517740,cg12127991,cg11431126,cg24885126	TSS1500,TSS1500,TSS1500,TSS200,1stExon;5'UTR	N_Shore,N_Shore,N_Shore,N_Shore,Island	RHOU,RHOU,RHOU,RHOU,RHOU;RHOU	NM_021205,NM_021205,NM_021205,NM_021205,NM_021205;NM_021205	hyperM.iPSC
1	227711023	227711034	2	cg18058949,cg26804128	TSS1500,TSS1500	S_Shore,S_Shore	NUP133,NUP133	NM_018230,NM_018230	hyperM.iPSC
1	228579960	228580984	5	cg19560210,cg10877049,cg01671575,cg04610742,cg25368560	1stExon,TSS200,TSS200,TSS1500,TSS1500	_,_	PGBD5,PGBD5,PGBD5,PGBD5,PGBD5	NM_024554,NM_024554,NM_024554,NM_024554,NM_024554	hyperM.iPSC
1	228916673	228916922	2	cg24474852,cg19125606	1stExon;5'UTR,1stExon;5'UTR	_,_	AGT;AGT,AGT;AGT	NM_000029;NM_000029,NM_000029;NM_000029	hyperM.iPSC
1	229058331	229059613	4	cg17276863,ch.1.4544771F,cg26872588,cg22874407	Body;1stExon;5'UTR;Body,Body;Body;TSS1500,Body;Body;TSS1500,Body;Body;TSS1500	_,_	C1orf198;C1orf198;C1orf198;C1orf198,C1orf198;C1orf198;C1orf198,C1orf198;C1orf198;C1orf198,C1orf198;C1orf198;C1orf198	NM_032800;NM_001136495;NM_001136495;NM_001136494,NM_032800;NM_001136494;NM_001136495,NM_032800;NM_001136494;NM_001136495,NM_032800;NM_001136494;NM_001136495	hyperM.iPSC
1	229181860	229182494	2	cg27306913,cg03017653	TSS1500;TSS1500;Body,TSS1500;TSS1500;Body	S_Shore,S_Shore	TTC13;TTC13;ARV1,TTC13;TTC13;ARV1	NM_024525;NM_001122835;NM_022786,NM_024525;NM_001122835;NM_022786	hyperM.iPSC
1	229243631	229243824	2	cg17199320,cg16516400	TSS1500,TSS1500	Island,S_Shore	FAM89A,FAM89A	NM_198552,NM_198552	hyperM.iPSC
1	229365381	229366019	4	cg17102963,cg03350439,cg17137424,cg07850592	1stExon,1stExon,1stExon,1stExon	Island,Island,Island,Island	TRIM67,TRIM67,TRIM67,TRIM67	NM_001004342,NM_001004342,NM_001004342,NM_001004342	hyperM.iPSC
1	229442826	229443106	2	cg02014416,cg24865132	TSS1500;Body,TSS1500;Body	N_Shore,N_Shore	GNPAT;C1orf131,GNPAT;C1orf131	NM_014236;NM_152379,NM_014236;NM_152379	hyperM.iPSC
1	229538614	229539303	3	cg26227044,cg16387254,cg15528490	1stExon,TSS1500;TSS1500;1stExon,TSS1500;TSS1500;1stExon	N_Shore,N_Shore,N_Shore	EXOC8,C1orf124;C1orf124;EXOC8,C1orf124;C1orf124;EXOC8	NM_175876,NM_032018;NM_001010984;NM_175876,NM_032018;NM_001010984;NM_175876	hyperM.iPSC
1	229828311	229828468	3	cg24430578,cg00346898,cg13782866	Body;TSS1500;TSS1500;TSS1500;TSS1500;Body;TSS1500;TSS1500;Body;TSS1500;Body;TSS1500;TSS1500;Body;TSS1500;TSS1500;TSS1500;TSS1500;TSS1500;TSS1500;TSS1500;TSS1500;TSS1500;Body;Body;TSS1500;TSS1500;TSS1500;Body;TSS1500;TSS1500,Body;TSS1500;TSS1500;TSS1500;TSS1500;Body;TSS1500;TSS1500;Body;TSS1500;Body;TSS1500;TSS1500;Body;TSS1500;TSS1500;TSS1500;TSS1500;TSS1500;TSS1500;TSS1500;TSS1500;TSS1500;Body;B…	N_Shore,N_Shore,N_Shore	TSNAX-DISC1;DISC1;DISC1;DISC1;DISC1;TSNAX-DISC1;DISC1;DISC1;TSNAX-DISC1;DISC1;TSNAX-DISC1;DISC1;DISC1;TSNAX-DISC1;DISC1;DISC1;DISC1;DISC1;DISC1;DISC1;DISC1;DISC1;DISC1;TSNAX-DISC1;TSNAX-DISC1;DISC1;DISC1;DISC1;TSNAX-DISC1;DISC1;DISC1,TSNAX-DISC1;DISC1;DISC1;DISC1;DISC1;TSNAX-DISC1;DISC1;DISC1;TSNAX-DISC1;DISC1;TSNAX-DISC1;DISC1;DISC1;TSNAX-DISC1;DISC1;DISC1;DISC1;DISC1;DISC1;DISC1;DISC1;DISC1;DIS…	NR_028394;NM_001164556;NM_001164538;NM_018662;NM_001164555;NR_028397;NM_001164554;NM_001164552;NR_028393;NM_001164537;NR_028400;NM_001164551;NM_001164539;NR_028398;NM_001164540;NM_001164542;NM_001164548;NM_001012959;NM_001164547;NM_001164550;NM_001164546;NM_001012957;NM_001012958;NR_028399;NR_028395;NM_001164545;NM_001164549;NM_001164544;NR_028396;NM_001164553;NM_001164541,NR_028394;NM_001164556;…	hyperM.iPSC
1	231008329	231008398	2	cg06935979,cg00951395	1stExon,1stExon	Island,S_Shore	KIAA1383,KIAA1383	NM_019090,NM_019090	hypoM.iPSC
1	231315332	231315468	2	cg00980058,cg16371229	Body,Body	_,_	PCNXL2,PCNXL2	NM_014801,NM_014801	hyperM.iPSC
1	231496864	231497021	2	cg04604962,cg15720156	Body,Body	N_Shore,N_Shore	PCNXL2,PCNXL2	NM_014801,NM_014801	hypoM.iPSC
1	231529198	231529352	2	cg09115440,cg04126810	TSS1500,TSS1500	N_Shore,N_Shore	KIAA1804,KIAA1804	NM_032435,NM_032435	hypoM.iPSC
1	231564526	231564539	2	cg02452586,cg09347582	Body,Body	Island,Island	KIAA1804,KIAA1804	NM_032435,NM_032435	hyperM.iPSC
1	232417457	232417611	3	cg13058819,cg25736663,cg13359765	Body,Body,Body	S_Shore,S_Shore,S_Shore	SLC35F3,SLC35F3,SLC35F3	NM_173508,NM_173508,NM_173508	hypoM.iPSC
1	232432163	232432882	2	cg01420001,cg00161124	Body,Body	N_Shore,N_Shore	SLC35F3,SLC35F3	NM_173508,NM_173508	hyperM.iPSC
1	232681616	232681859	3	cg22398808,cg03802191,cg11137277	TSS200,TSS1500,TSS1500	S_Shore,S_Shore,S_Shore	TARBP1,TARBP1,TARBP1	NM_005646,NM_005646,NM_005646	hyperM.iPSC
1	232733710	232734172	2	cg00123090,cg21546522	_,_	_,_	_,_	_,_	hyperM.iPSC
1	232808420	232809289	2	cg09517751,cg10825398	3'UTR;3'UTR,3'UTR;3'UTR	N_Shelf,N_Shore	IRF2BP2;IRF2BP2,IRF2BP2;IRF2BP2	NM_182972;NM_001077397,NM_182972;NM_001077397	hyperM.iPSC
1	232810311	232810453	3	cg19905445,cg25141943,cg00753492	Body;Body,Body;Body,Body;Body	N_Shore,N_Shore,N_Shore	IRF2BP2;IRF2BP2,IRF2BP2;IRF2BP2,IRF2BP2;IRF2BP2	NM_001077397;NM_182972,NM_001077397;NM_182972,NM_001077397;NM_182972	hyperM.iPSC
1	232814411	232815728	4	cg02977524,cg22351904,cg03317082,cg09324669	_,_	S_Shore,S_Shore,S_Shore,S_Shelf	_,_	_,_	hyperM.iPSC
1	232919420	232919515	3	cg22699768,cg13055709,cg15924102	_,_	_,_	_,_	_,_	hyperM.iPSC
1	233165712	233165774	3	cg27526774,cg00311883,cg02088292	_,_	_,_	_,_	_,_	hyperM.iPSC
1	233357028	233357747	2	cg19746343,cg10234506	Body,Body;Body	N_Shore,N_Shore	TOMM20,SNORA14B;TOMM20	NM_014765,NR_002956;NM_014765	hyperM.iPSC
1	234113562	234113657	2	cg02829654,cg12167564	_,_	_,_	_,_	_,_	hyperM.iPSC
1	234626269	234626298	2	cg04311403,cg00178850	Body;Body,Body;Body	S_Shore,S_Shore	EDARADD;EDARADD,EDARADD;EDARADD	NM_080738;NM_145861,NM_080738;NM_145861	hypoM.iPSC
1	234753187	234753676	5	cg01030476,cg18322510,cg09334514,cg08137948,cg13444964	TSS200;TSS200;5'UTR;TSS1500,TSS200;TSS200;5'UTR;TSS1500,TSS200;TSS200;5'UTR;TSS1500,5'UTR;1stExon;5'UTR;5'UTR;TSS1500;1stExon,5'UTR;TSS200;5'UTR;5'UTR	N_Shore,N_Shore,N_Shore,N_Shore,N_Shore	LGALS8;LGALS8;LGALS8;LGALS8,LGALS8;LGALS8;LGALS8;LGALS8,LGALS8;LGALS8;LGALS8;LGALS8,LGALS8;LGALS8;LGALS8;LGALS8;LGALS8;LGALS8,LGALS8;LGALS8;LGALS8;LGALS8	NM_201543;NM_006499;NM_201545;NM_201544,NM_201543;NM_006499;NM_201545;NM_201544,NM_201543;NM_006499;NM_201545;NM_201544,NM_201543;NM_201543;NM_006499;NM_201545;NM_201544;NM_006499,NM_201543;NM_201544;NM_006499;NM_201545	hyperM.iPSC
1	236092037	236092210	2	cg11384661,cg03059126	TSS200,Body	_,_	LOC100130331,LOC100130331	NR_027247,NR_027247	hyperM.iPSC
1	236120451	236122052	4	cg03872376,cg20185945,cg26810908,cg03673470	1stExon;Body,TSS200;Body,TSS1500;Body,TSS1500;Body	_,_	ZP4;LOC100130331,ZP4;LOC100130331,ZP4;LOC100130331,ZP4;LOC100130331	NM_021186;NR_027247,NM_021186;NR_027247,NM_021186;NR_027247,NM_021186;NR_027247	hyperM.iPSC
1	239587503	239587564	3	cg24472496,cg24800810,cg18271538	TSS1500,TSS1500,TSS1500	S_Shore,S_Shore,S_Shore	RGS7,RGS7,RGS7	NM_002924,NM_002924,NM_002924	hyperM.iPSC
1	240679410	240679868	4	cg02567839,cg20308540,cg23213872,cg11726474	5'UTR,5'UTR,5'UTR,5'UTR	_,_	PLD5,PLD5,PLD5,PLD5	NM_152666,NM_152666,NM_152666,NM_152666	hyperM.iPSC
1	240749765	240750665	2	cg17150265,cg12636785	5'UTR,5'UTR	N_Shelf,N_Shelf	PLD5,PLD5	NM_152666,NM_152666	hyperM.iPSC
1	241704461	241704589	2	cg22514764,cg17110767	Body,Body	Island,Island	SDCCAG8,SDCCAG8	NM_006642,NM_006642	hypoM.iPSC
1	241719246	241720581	4	cg11964349,cg01833436,cg20059832,cg15059429	Body;3'UTR,Body;3'UTR,Body;3'UTR,Body;3'UTR	Island,S_Shore,S_Shore,S_Shore	SDCCAG8;AKT3,SDCCAG8;AKT3,SDCCAG8;AKT3,SDCCAG8;AKT3	NM_006642;NM_181690,NM_006642;NM_181690,NM_006642;NM_181690,NM_006642;NM_181690	hypoM.iPSC
1	242280509	242280829	2	cg15896892,cg13360230	TSS1500,TSS1500	S_Shore,S_Shore	ZNF238,ZNF238	NM_205768,NM_205768	hyperM.iPSC
1	243591161	243591392	2	cg03130248,cg22787191	Body,Body	_,_	KIF26B,KIF26B	NM_018012,NM_018012	hyperM.iPSC
1	243819925	243820258	3	cg26429783,cg26660656,cg12274113	Body,Body,Body	N_Shore,Island,Island	KIF26B,KIF26B,KIF26B	NM_018012,NM_018012,NM_018012	hyperM.iPSC
1	244270214	244270282	2	cg09016610,cg04214370	Body;Body,Body;Body	_,_	SMYD3;SMYD3,SMYD3;SMYD3	NM_022743;NM_001167740,NM_022743;NM_001167740	hyperM.iPSC
1	244737521	244737563	2	cg18171512,cg01396391	TSS1500,TSS1500	S_Shore,S_Shore	SMYD3,SMYD3	NM_001167740,NM_001167740	hyperM.iPSC
1	245019512	245019537	2	cg18950481,cg22560020	TSS200,TSS200	S_Shore,S_Shore	LOC149134,LOC149134	NR_015422,NR_015422	hypoM.iPSC
1	245342358	245342495	2	cg12432038,cg02578321	TSS200,TSS200	Island,S_Shore	C1orf229,C1orf229	NM_207401,NM_207401	hypoM.iPSC
1	245563198	245563545	2	cg16710146,cg22036872	_,_	S_Shore,S_Shore	_,_	_,_	hypoM.iPSC
1	245577987	245578023	2	cg15092219,cg06902607	_,_	_,_	_,_	_,_	hyperM.iPSC
1	245645175	245646729	7	cg18183941,cg21824010,cg21806273,cg21919599,cg03505654,cg03466998,cg26112639	TSS1500;TSS1500,TSS1500;TSS1500,TSS1500;TSS1500,TSS200;TSS200,5'UTR;5'UTR,TSS1500;5'UTR;TSS1500;TSS1500;5'UTR,TSS1500;5'UTR;TSS1500;TSS1500;5'UTR	_,_	NLRP3;NLRP3,NLRP3;NLRP3,NLRP3;NLRP3,NLRP3;NLRP3,NLRP3;NLRP3,NLRP3;NLRP3;NLRP3;NLRP3;NLRP3,NLRP3;NLRP3;NLRP3;NLRP3;NLRP3	NM_001079821;NM_001127461,NM_001079821;NM_001127461,NM_001079821;NM_001127461,NM_001127461;NM_001079821,NM_001079821;NM_001127461,NM_001127462;NM_001079821;NM_004895;NM_183395;NM_001127461,NM_001127462;NM_001079821;NM_004895;NM_183395;NM_001127461	hyperM.iPSC
1	245653876	245654417	2	cg06710101,cg12280471	Body;Body;Body;Body;Body,Body;Body;Body;Body;Body	_,_	NLRP3;NLRP3;NLRP3;NLRP3;NLRP3,NLRP3;NLRP3;NLRP3;NLRP3;NLRP3	NM_001079821;NM_183395;NM_001127461;NM_001127462;NM_004895,NM_001079821;NM_183395;NM_001127461;NM_001127462;NM_004895	hyperM.iPSC
1	245720763	245720883	2	cg00715811,cg09638704	TSS1500,TSS200	_,_	OR2W5,OR2W5	NM_001004698,NM_001004698	hyperM.iPSC
1	245747725	245748404	6	cg21950037,cg22374474,cg21399703,cg05639522,cg18198730,cg11166453	_,_	N_Shore,N_Shore,Island,Island,Island,Island	_,_	_,_	hyperM.iPSC
1	245760664	245761154	6	cg17545182,cg13930544,cg12754571,cg12758973,cg02104434,cg04899629	Body;3'UTR,Body;3'UTR,TSS200;3'UTR,TSS200;3'UTR,TSS1500;3'UTR,TSS1500;3'UTR	Island,Island,Island,Island,Island,S_Shore	LOC148824;OR2C3,LOC148824;OR2C3,LOC148824;OR2C3,LOC148824;OR2C3,LOC148824;OR2C3,LOC148824;OR2C3	NR_027309;NM_198074,NR_027309;NM_198074,NR_027309;NM_198074,NR_027309;NM_198074,NR_027309;NM_198074,NR_027309;NM_198074	hyperM.iPSC
1	245764498	245764964	2	cg02795546,cg22699727	TSS1500,TSS1500	S_Shelf,S_Shelf	OR2C3,OR2C3	NM_198074,NM_198074	hyperM.iPSC
1	245778733	245779214	5	cg02052265,cg03343128,cg12769118,cg17518550,cg05767404	TSS1500,TSS1500,TSS200,TSS200,Body	_,_	C1orf150,C1orf150,C1orf150,C1orf150,C1orf150	NM_145278,NM_145278,NM_145278,NM_145278,NM_145278	hyperM.iPSC
1	245869326	245869558	5	cg27543040,cg02518135,cg25220063,cg25017620,cg15829088	_,_	N_Shore,Island,Island,Island,Island	_,_	_,_	hyperM.iPSC
1	245943066	245943689	2	cg14156184,cg01507200	TSS1500,TSS1500	_,_	OR6F1,OR6F1	NM_001005286,NM_001005286	hyperM.iPSC
1	246071509	246072882	5	cg12080717,cg05726701,cg11606050,cg21542666,cg06544652	1stExon,1stExon,TSS200,TSS1500,TSS1500	_,_	OR11L1,OR11L1,OR11L1,OR11L1,OR11L1	NM_001001959,NM_001001959,NM_001001959,NM_001001959,NM_001001959	hyperM.iPSC
1	246085439	246085857	2	cg02148612,cg04902327	_,TSS1500	N_Shore,N_Shore	_,TRIM58	_,NM_015431	hyperM.iPSC
1	246366878	246367025	2	cg22523072,cg00966930	_,_	_,_	_,_	_,_	hyperM.iPSC
1	246433022	246433506	2	cg05353872,cg07598464	1stExon,1stExon	_,_	OR2M3,OR2M3	NM_001004689,NM_001004689	hyperM.iPSC
1	246590859	246591630	2	cg26353448,cg07483650	TSS1500,1stExon	_,_	OR2T4,OR2T4	NM_001004696,NM_001004696	hyperM.iPSC
1	246617796	246618032	2	cg00883837,cg20465661	1stExon,1stExon	_,_	OR2T6,OR2T6	NM_001005471,NM_001005471	hyperM.iPSC
1	247072310	247072485	2	cg02856842,cg11706999	3'UTR,3'UTR	N_Shore,N_Shore	SH3BP5L,SH3BP5L	NM_030645,NM_030645	hyperM.iPSC
2	183256	183509	3	cg18672716,cg14384416,cg18408209	_,_	_,N_Shelf	_,_	_,_	hyperM.iPSC
2	276830	277395	2	cg25710298,cg18208842	Body,Body	N_Shore,Island	FAM150B,FAM150B	NM_001002919,NM_001002919	hypoM.iPSC
2	372090	372356	2	cg07160793,cg13170076	_,_	_,_	_,_	_,_	hypoM.iPSC
2	382642	382873	2	cg17587385,cg23523711	_,_	_,_	_,_	_,_	hyperM.iPSC
2	384115	384572	4	cg19039481,cg10717610,cg23982445,cg19988482	_,_	_,_	_,_	_,_	hyperM.iPSC
2	387730	387781	2	cg02095697,cg11449860	_,_	_,_	_,_	_,_	hyperM.iPSC
2	407421	408075	2	cg26117389,cg26545519	_,_	N_Shelf,N_Shore	_,_	_,_	hyperM.iPSC
2	428095	428197	2	cg26385097,cg17811608	_,_	_,_	_,_	_,_	hyperM.iPSC
2	430148	430188	2	cg10012393,cg19007570	_,_	_,_	_,_	_,_	hyperM.iPSC
2	474237	474825	2	cg27457631,cg06432426	_,_	_,_	_,_	_,_	hyperM.iPSC
2	479332	479360	2	cg13973124,cg20679626	_,_	_,_	_,_	_,_	hyperM.iPSC
2	558198	558321	2	cg16711011,cg06640593	_,_	_,_	_,_	_,_	hyperM.iPSC
2	572704	573975	3	cg01222732,cg14414944,cg01015769	_,_	N_Shore,Island,S_Shore	_,_	_,_	hyperM.iPSC
2	584380	585071	3	cg03521077,cg05089527,cg25604731	_,_	_,_	_,_	_,_	hyperM.iPSC
2	652770	653024	2	cg25785397,cg21644387	_,_	S_Shore,S_Shelf	_,_	_,_	hyperM.iPSC
2	681012	681064	3	cg00500140,cg13758904,cg20862447	_,_	_,_	_,_	_,_	hyperM.iPSC
2	699250	699329	2	cg21565937,cg14585167	_,_	_,_	_,_	_,_	hyperM.iPSC
2	766666	766719	2	cg18823499,cg04587424	_,_	_,_	_,_	_,_	hyperM.iPSC
2	784646	785989	5	cg06523516,cg01109734,cg18191209,cg21032567,cg24485927	_,_	_,_	_,_	_,_	hyperM.iPSC
2	847746	848127	3	cg00905746,cg26995653,cg10236778	_,_	_,_	_,_	_,_	hyperM.iPSC
2	934690	935298	2	cg17497490,cg06431025	_,TSS1500	N_Shore,N_Shore	_,SNTG2	_,NM_018968	hypoM.iPSC
2	937167	937589	2	cg11612266,cg20193363	Body,Body	Island,S_Shore	SNTG2,SNTG2	NM_018968,NM_018968	hypoM.iPSC
2	1224241	1224303	2	cg01708202,cg26188420	Body,Body	_,_	SNTG2,SNTG2	NM_018968,NM_018968	hyperM.iPSC
2	1265401	1265404	2	cg00148862,cg09294347	Body,Body	Island,Island	SNTG2,SNTG2	NM_018968,NM_018968	hyperM.iPSC
2	1266794	1266985	3	cg13315744,cg12221580,cg26495357	Body,Body,Body	S_Shore,S_Shore,S_Shore	SNTG2,SNTG2,SNTG2	NM_018968,NM_018968,NM_018968	hyperM.iPSC
2	1356763	1356938	2	cg09508362,cg11912215	_,_	_,_	_,_	_,_	hyperM.iPSC
2	1404042	1404627	3	cg14478255,cg02963613,cg03795587	Body;Body;Body;Body,Body;Body;Body;Body,Body;Body;Body;Body	_,_	TPO;TPO;TPO;TPO,TPO;TPO;TPO;TPO,TPO;TPO;TPO;TPO	NM_175719;NM_000547;NM_175721;NM_175722,NM_175719;NM_000547;NM_175721;NM_175722,NM_175719;NM_000547;NM_175721;NM_175722	hyperM.iPSC
2	1431267	1431374	2	cg16407924,cg26605809	Body;Body;Body;Body,Body;Body;Body;Body	_,_	TPO;TPO;TPO;TPO,TPO;TPO;TPO;TPO	NM_175719;NM_000547;NM_175721;NM_175722,NM_175719;NM_000547;NM_175721;NM_175722	hyperM.iPSC
2	1459796	1459951	2	cg07932899,cg14793137	Body;Body;Body;Body,Body;Body;Body;Body	Island,Island	TPO;TPO;TPO;TPO,TPO;TPO;TPO;TPO	NM_175719;NM_000547;NM_175721;NM_175722,NM_175719;NM_000547;NM_175721;NM_175722	hyperM.iPSC
2	1461845	1461970	2	cg12666976,cg20957776	Body;Body;Body;Body,Body;Body;Body;Body	S_Shore,S_Shore	TPO;TPO;TPO;TPO,TPO;TPO;TPO;TPO	NM_175719;NM_000547;NM_175721;NM_175722,NM_175719;NM_000547;NM_175721;NM_175722	hyperM.iPSC
2	1466943	1467182	2	cg19905414,cg17299636	Body;Body;Body;Body,Body;Body;Body;Body	_,_	TPO;TPO;TPO;TPO,TPO;TPO;TPO;TPO	NM_175719;NM_000547;NM_175721;NM_175722,NM_175719;NM_000547;NM_175721;NM_175722	hyperM.iPSC
2	1476822	1477072	2	cg13414059,cg18019372	Body;Body;Body;Body,Body;Body;Body;Body	S_Shelf,S_Shelf	TPO;TPO;TPO;TPO,TPO;TPO;TPO;TPO	NM_175719;NM_000547;NM_175721;NM_175722,NM_175719;NM_000547;NM_175721;NM_175722	hyperM.iPSC
2	1486746	1486839	2	cg10672136,cg23239637	Body;Body;Body;Body,Body;Body;Body;Body	_,_	TPO;TPO;TPO;TPO,TPO;TPO;TPO;TPO	NM_175719;NM_000547;NM_175721;NM_175722,NM_175719;NM_000547;NM_175721;NM_175722	hyperM.iPSC
2	1544734	1546049	4	cg05695007,cg07503658,cg25693497,cg11985116	_,_	_,_	_,_	_,_	hyperM.iPSC
2	1588069	1588667	5	cg23277693,cg16151651,cg13529733,cg21551340,cg11234688	_,_	_,_	_,_	_,_	hyperM.iPSC
2	1635564	1636469	2	cg24741066,cg01629007	Body,Body	S_Shelf,_	PXDN,PXDN	NM_012293,NM_012293	hyperM.iPSC
2	1690803	1691534	3	cg16909084,cg18548165,cg10366053	Body,Body,Body	_,_	PXDN,PXDN,PXDN	NM_012293,NM_012293,NM_012293	hyperM.iPSC
2	1727879	1728083	3	cg24129977,cg05241015,cg17801352	TSS1500,TSS1500,TSS1500	Island,Island,S_Shore	PXDN,PXDN,PXDN	NM_012293,NM_012293,NM_012293	hyperM.iPSC
2	1775083	1775235	3	cg00236305,cg22060041,cg09022325	Body,Body,Body	_,_	MYT1L,MYT1L,MYT1L	NM_015025,NM_015025,NM_015025	hyperM.iPSC
2	1799322	1800740	4	cg14463068,cg23861841,cg04369651,cg02542953	Body,Body,Body,Body	_,_	MYT1L,MYT1L,MYT1L,MYT1L	NM_015025,NM_015025,NM_015025,NM_015025	hyperM.iPSC
2	1874198	1874414	2	cg19139320,cg10215032	Body,Body	N_Shore,N_Shore	MYT1L,MYT1L	NM_015025,NM_015025	hyperM.iPSC
2	1905373	1906216	5	cg02966841,cg18148375,cg25654677,cg14128411,cg08689708	Body,Body,Body,Body,Body	_,_	MYT1L,MYT1L,MYT1L,MYT1L,MYT1L	NM_015025,NM_015025,NM_015025,NM_015025,NM_015025	hyperM.iPSC
2	1921821	1922670	2	cg14958969,cg26315667	Body,Body	S_Shore,S_Shelf	MYT1L,MYT1L	NM_015025,NM_015025	hyperM.iPSC
2	2090630	2090655	2	cg21239227,cg17519749	5'UTR,5'UTR	_,_	MYT1L,MYT1L	NM_015025,NM_015025	hyperM.iPSC
2	2155781	2156538	2	cg21741679,cg13205617	5'UTR,5'UTR	_,_	MYT1L,MYT1L	NM_015025,NM_015025	hyperM.iPSC
2	2171079	2171373	2	cg21069434,cg05960850	5'UTR,5'UTR	N_Shore,N_Shore	MYT1L,MYT1L	NM_015025,NM_015025	hyperM.iPSC
2	2274513	2274593	2	cg03322328,cg16188379	5'UTR,5'UTR	_,_	MYT1L,MYT1L	NM_015025,NM_015025	hyperM.iPSC
2	2548654	2549325	2	cg22950718,cg07362512	_,_	_,_	_,_	_,_	hyperM.iPSC
2	2560292	2560564	3	cg20506745,cg05092362,cg10767420	_,_	_,_	_,_	_,_	hyperM.iPSC
2	2622379	2622487	2	cg15365426,cg04062218	_,_	_,_	_,_	_,_	hyperM.iPSC
2	2633364	2634058	2	cg00732878,cg14667853	_,_	Island,S_Shore	_,_	_,_	hyperM.iPSC
2	2651725	2651788	2	cg02236554,cg23925283	_,_	_,_	_,_	_,_	hyperM.iPSC
2	2671861	2671896	2	cg23822732,cg16901302	_,_	_,_	_,_	_,_	hyperM.iPSC
2	2691676	2692392	4	cg21484315,cg27014783,cg02322969,cg07912020	_,_	_,_	_,_	_,_	hyperM.iPSC
2	2872149	2872174	2	cg14508405,cg06571123	_,_	_,_	_,_	_,_	hyperM.iPSC
2	2915817	2916475	2	cg13443016,cg17108285	_,_	_,_	_,_	_,_	hyperM.iPSC
2	3023806	3024248	2	cg02761944,cg20424973	_,_	_,_	_,_	_,_	hyperM.iPSC
2	3042122	3043109	7	cg05373263,cg01290791,cg05698294,cg07586391,cg06076512,cg02152985,cg03184487	_,_	N_Shore,N_Shore,N_Shore,Island,Island,S_Shore,S_Shore	_,_	_,_	hyperM.iPSC
2	3084060	3084144	2	cg03318593,cg14595617	_,_	_,_	_,_	_,_	hyperM.iPSC
2	3110283	3110379	4	cg06351520,cg14701108,cg11170044,cg14552732	_,_	_,_	_,_	_,_	hyperM.iPSC
2	3296700	3297046	3	cg21706038,cg21557724,cg14461974	Body,Body,Body	Island,Island,S_Shore	TSSC1,TSSC1,TSSC1	NM_003310,NM_003310,NM_003310	hyperM.iPSC
2	3431354	3431631	4	cg22182287,cg06360976,cg11642891,cg15807143	Body,Body,Body,Body	Island,Island,Island,S_Shore	TTC15,TTC15,TTC15,TTC15	NM_016030,NM_016030,NM_016030,NM_016030	hyperM.iPSC
2	3600469	3600530	3	cg14240768,cg25819879,cg23466183	TSS1500,TSS1500,TSS200	N_Shore,N_Shore,Island	RPS7,RPS7,RPS7	NM_001011,NM_001011,NM_001011	hyperM.iPSC
2	3620275	3620585	4	cg18105675,cg19867917,cg09974661,cg00835279	TSS1500;TSS1500,TSS200;TSS200,TSS200;TSS200,1stExon;5'UTR;1stExon;5'UTR	N_Shore,Island,Island,Island	COLEC11;COLEC11,COLEC11;COLEC11,COLEC11;COLEC11,COLEC11;COLEC11;COLEC11;COLEC11	NM_024027;NM_199235,NM_199235;NM_024027,NM_199235;NM_024027,NM_024027;NM_024027;NM_199235;NM_199235	hyperM.iPSC
2	3632117	3632345	2	cg09786321,cg20296924	Body;Body,Body;Body	_,_	COLEC11;COLEC11,COLEC11;COLEC11	NM_024027;NM_199235,NM_024027;NM_199235	hyperM.iPSC
2	3636769	3636808	2	cg18666930,cg08211853	Body;Body,Body;Body	_,_	COLEC11;COLEC11,COLEC11;COLEC11	NM_024027;NM_199235,NM_024027;NM_199235	hyperM.iPSC
2	3638743	3638814	2	cg23548658,cg02093176	Body;Body,Body;Body	_,_	COLEC11;COLEC11,COLEC11;COLEC11	NM_024027;NM_199235,NM_024027;NM_199235	hyperM.iPSC
2	3660905	3661158	3	cg01745480,cg27472937,cg09256862	Body;Body,Body;Body,Body;Body	Island,Island,Island	COLEC11;COLEC11,COLEC11;COLEC11,COLEC11;COLEC11	NM_024027;NM_199235,NM_024027;NM_199235,NM_024027;NM_199235	hyperM.iPSC
2	3675253	3676296	3	cg08980304,cg15355967,cg01730148	_,_	N_Shore,N_Shore,N_Shore	_,_	_,_	hyperM.iPSC
2	3682238	3683146	2	cg06156640,cg00933835	TSS1500,TSS1500	_,_	ALLC,ALLC	NM_018436,NM_018436	hyperM.iPSC
2	3692153	3692914	3	cg27089736,cg20493526,cg15327641	5'UTR,5'UTR,5'UTR	_,_	ALLC,ALLC,ALLC	NM_018436,NM_018436,NM_018436	hyperM.iPSC
2	3813917	3814391	2	cg03985452,cg19106467	_,_	S_Shore,S_Shelf	_,_	_,_	hyperM.iPSC
2	3866265	3867121	2	cg06144418,cg05612066	_,_	_,_	_,_	_,_	hyperM.iPSC
2	3911614	3911923	3	cg10951591,cg18123760,cg23194912	_,_	_,_	_,_	_,_	hyperM.iPSC
2	3968383	3968688	2	cg10187167,cg26881591	_,_	_,_	_,_	_,_	hyperM.iPSC
2	4028672	4028720	2	cg16721427,cg15375488	_,_	Island,Island	_,_	_,_	hyperM.iPSC
2	4161455	4161519	2	cg09071834,cg20415092	_,_	_,_	_,_	_,_	hyperM.iPSC
2	5813924	5813940	2	cg18954144,cg08396985	_,_	_,_	_,_	_,_	hyperM.iPSC
2	5989604	5990432	5	cg12922161,cg02969706,cg25803107,cg17050941,cg04747036	TSS1500,TSS1500,TSS200,Body,Body	_,_	LOC150622,LOC150622,LOC150622,LOC150622,LOC150622	NR_026832,NR_026832,NR_026832,NR_026832,NR_026832	hyperM.iPSC
2	6038871	6040265	7	cg23851558,cg14820415,cg22314787,cg13217590,cg26881307,cg14684749,cg08180229	TSS1500,TSS1500,TSS200,TSS200,Body,Body,Body	_,_	LOC400940,LOC400940,LOC400940,LOC400940,LOC400940,LOC400940,LOC400940	NR_026833,NR_026833,NR_026833,NR_026833,NR_026833,NR_026833,NR_026833	hyperM.iPSC
2	6935149	6935604	4	cg09829983,cg10844760,cg10959651,cg10549986	TSS200,TSS200,1stExon,1stExon	_,_	RSAD2,RSAD2,RSAD2,RSAD2	NM_080657,NM_080657,NM_080657,NM_080657	hyperM.iPSC
2	8417484	8417630	2	cg25689167,cg10902987	_,_	_,_	_,_	_,_	hyperM.iPSC
2	8641357	8642136	3	cg00085123,cg13231954,cg01048749	_,_	Island,S_Shore,S_Shore	_,_	_,_	hypoM.iPSC
2	8740541	8741100	2	cg00538370,cg20495404	3'UTR,3'UTR	S_Shore,N_Shore	ID2,ID2	NM_002166,NM_002166	hyperM.iPSC
2	9200721	9200743	2	cg05172956,cg01011898	_,_	_,_	_,_	_,_	hyperM.iPSC
2	9345249	9346177	2	cg11444072,cg23902076	Body;Body,Body;Body	_,_	ASAP2;ASAP2,ASAP2;ASAP2	NM_001135191;NM_003887,NM_001135191;NM_003887	hyperM.iPSC
2	9900545	9900662	2	cg00075467,cg16155081	TSS1500,TSS1500	N_Shore,N_Shore	TAF1B,TAF1B	NM_005680,NM_005680	hyperM.iPSC
2	10066224	10066417	2	cg13716880,cg17341366	_,_	_,_	_,_	_,_	hyperM.iPSC
2	10103590	10104537	2	cg15123428,cg19219655	Body,Body	S_Shore,S_Shelf	KLF11,KLF11	NM_003597,NM_003597	hyperM.iPSC
2	10141047	10141683	2	cg00692774,cg13414654	_,_	S_Shelf,S_Shelf	_,_	_,_	hyperM.iPSC
2	10177681	10177731	2	cg09331106,cg14638209	_,_	N_Shore,Island	_,_	_,_	hyperM.iPSC
2	10555425	10555564	3	cg01517500,cg04571189,cg22157027	_,_	_,_	_,_	_,_	hyperM.iPSC
2	10583178	10584164	3	cg07139514,cg02475539,cg08846959	_,_	N_Shore,N_Shore,Island	_,_	_,_	hyperM.iPSC
2	10605679	10606466	3	cg20473155,cg26096190,cg16955336	_,_	_,_	_,_	_,_	hyperM.iPSC
2	10748107	10748215	4	cg05042697,cg03983476,cg01299579,cg02196655	TSS1500,TSS1500,TSS1500,TSS1500	S_Shore,S_Shore,S_Shore,S_Shore	NOL10,NOL10,NOL10,NOL10	NM_024894,NM_024894,NM_024894,NM_024894	hyperM.iPSC
2	10867962	10868701	3	cg01930746,cg20821314,cg14465207	Body,Body,Body	N_Shore,N_Shore,N_Shore	PDIA6,PDIA6,PDIA6	NM_005742,NM_005742,NM_005742	hyperM.iPSC
2	10892925	10893137	2	cg08078204,cg11270917	_,_	_,_	_,_	_,_	hyperM.iPSC
2	10968586	10969179	2	cg00451388,cg18639125	TSS1500,TSS1500	N_Shore,N_Shore	KCNF1,KCNF1	NM_002236,NM_002236	hyperM.iPSC
2	11040927	11041067	3	cg11241151,cg02479842,cg03257743	_,_	_,_	_,_	_,_	hyperM.iPSC
2	11082012	11082128	2	cg16637467,cg26462586	_,_	_,_	_,_	_,_	hyperM.iPSC
2	11432560	11432615	2	cg00478421,cg11972534	_,_	_,_	_,_	_,_	hyperM.iPSC
2	11522990	11524939	4	cg04073840,cg07890032,cg09914581,cg02819921	Body;Body;Body;Body;Body,Body;Body;Body;Body;Body,TSS200;TSS200;TSS200;TSS200;TSS200,TSS1500;TSS1500;TSS1500;TSS1500;TSS1500	N_Shore,Island,S_Shore,S_Shore	E2F6;E2F6;E2F6;E2F6;E2F6,E2F6;E2F6;E2F6;E2F6;E2F6,E2F6;E2F6;E2F6;E2F6;E2F6,E2F6;E2F6;E2F6;E2F6;E2F6	NR_003093;NM_198256;NR_003092;NR_003095;NR_003094,NR_003093;NM_198256;NR_003092;NR_003095;NR_003094,NM_198256;NR_003093;NR_003094;NR_003095;NR_003092,NR_003094;NR_003092;NR_003095;NM_198256;NR_003093	hyperM.iPSC
2	11598856	11599359	2	cg19749001,cg25785303	TSS1500;5'UTR;5'UTR,TSS1500;5'UTR;5'UTR	_,_	GREB1;GREB1;GREB1,GREB1;GREB1;GREB1	NM_033090;NM_148903;NM_014668,NM_033090;NM_148903;NM_014668	hyperM.iPSC
2	11691722	11693278	3	cg00851111,cg04699394,cg10970045	Body,Body,Body	N_Shore,S_Shore,S_Shore	GREB1,GREB1,GREB1	NM_014668,NM_014668,NM_014668	hyperM.iPSC
2	11727132	11728048	3	cg04141164,cg07258474,cg24421094	1stExon,1stExon,TSS1500	Island,Island,S_Shore	NTSR2,NTSR2,NTSR2	NM_012344,NM_012344,NM_012344	hyperM.iPSC
2	11802717	11803011	3	cg02069619,cg19000647,cg11466832	TSS1500,TSS1500,TSS1500	N_Shore,N_Shore,N_Shore	LPIN1,LPIN1,LPIN1	NM_145693,NM_145693,NM_145693	hypoM.iPSC
2	11803704	11803851	2	cg17211562,cg09863772	TSS1500,TSS1500	Island,Island	LPIN1,LPIN1	NM_145693,NM_145693	hyperM.iPSC
2	11887529	11888173	3	cg10018519,cg01876978,cg19924948	_,_	_,_	_,_	_,_	hyperM.iPSC
2	12063670	12064657	2	cg04549583,cg09070191	_,_	_,_	_,_	_,_	hyperM.iPSC
2	12592215	12592427	2	cg06476438,cg23218363	_,_	_,_	_,_	_,_	hyperM.iPSC
2	15722045	15722463	5	cg21824017,cg02818160,cg17804611,cg13914708,cg12283119	_,_	_,_	_,_	_,_	hyperM.iPSC
2	15996175	15996464	2	cg00422624,cg21699252	_,_	N_Shore,N_Shore	_,_	_,_	hypoM.iPSC
2	16071628	16071776	2	cg24694501,cg01601949	_,_	Island,Island	_,_	_,_	hyperM.iPSC
2	16708893	16709068	2	cg06829760,cg10813980	5'UTR,5'UTR	_,_	FAM49A,FAM49A	NM_030797,NM_030797	hyperM.iPSC
2	17924800	17925053	2	cg10265016,cg26119806	5'UTR,5'UTR	S_Shore,S_Shore	KCNS3,KCNS3	NM_002252,NM_002252	hypoM.iPSC
2	19414879	19415425	4	cg27117509,cg07531268,cg12619940,cg26701390	3'UTR,3'UTR,3'UTR,3'UTR	N_Shore,Island,Island,Island	OSR1,OSR1,OSR1,OSR1	NM_145260,NM_145260,NM_145260,NM_145260	hypoM.iPSC
2	19416718	19416903	3	cg16752876,cg11943209,cg02172492	Body,Body,Body	Island,Island,Island	OSR1,OSR1,OSR1	NM_145260,NM_145260,NM_145260	hypoM.iPSC
2	19931865	19932387	2	cg15844871,cg09336406	_,_	N_Shore,Island	_,_	_,_	hyperM.iPSC
2	20289130	20289161	2	cg15339720,cg13003011	TSS1500;TSS1500,TSS1500;TSS1500	Island,Island	SDC1;SDC1,SDC1;SDC1	NM_002997;NM_001006946,NM_002997;NM_001006946	hyperM.iPSC
2	20511675	20512061	2	cg16258854,cg25432336	1stExon;3'UTR,1stExon;3'UTR	S_Shore,S_Shore	RHOB;RHOB,RHOB;RHOB	NM_004040;NM_004040,NM_004040;NM_004040	hypoM.iPSC
2	21120005	21120680	7	cg25035485,cg16723488,cg16306978,cg24309555,cg03350299,cg25071744,cg07636176	Body,TSS200,TSS200,TSS200,TSS200,TSS200,TSS1500	N_Shore,Island,Island,Island,Island,S_Shore,S_Shore	APOB,APOB,APOB,APOB,APOB,APOB,APOB	NM_000384,NM_000384,NM_000384,NM_000384,NM_000384,NM_000384,NM_000384	hypoM.iPSC
2	23211351	23211949	2	ch.2.23211351R,cg00388287	_,_	_,_	_,_	_,_	hyperM.iPSC
2	23693773	23694268	6	cg26109017,cg17129809,cg14377922,cg17419888,cg14067761,cg02338778	Body,Body,Body,Body,Body,Body	_,_	KLHL29,KLHL29,KLHL29,KLHL29,KLHL29,KLHL29	NM_052920,NM_052920,NM_052920,NM_052920,NM_052920,NM_052920	hyperM.iPSC
2	23739698	23739862	2	cg02696169,cg15123692	Body,Body	_,_	KLHL29,KLHL29	NM_052920,NM_052920	hyperM.iPSC
2	24015760	24016171	3	cg01809281,cg01853276,cg04619854	TSS1500,TSS1500,TSS1500	N_Shore,N_Shore,N_Shore	UBXN2A,UBXN2A,UBXN2A	NM_181713,NM_181713,NM_181713	hyperM.iPSC
2	24125331	24125548	3	cg23065097,cg03687700,cg00901401	TSS1500;TSS1500,TSS1500;TSS1500,TSS1500;TSS1500	N_Shore,N_Shore,N_Shore	FKBP1B;FKBP1B,FKBP1B;FKBP1B,FKBP1B;FKBP1B	NM_004116;NM_054033,NM_004116;NM_054033,NM_004116;NM_054033	hyperM.iPSC
2	24251291	24252363	7	cg01343041,cg18587476,cg17277199,cg02683114,cg02115117,cg04609635,cg02315489	TSS200,TSS200,TSS200,Body,Body,Body,Body	Island,Island,Island,Island,Island,S_Shore,S_Shore	C2orf84,C2orf84,C2orf84,C2orf84,C2orf84,C2orf84,C2orf84	NM_001040710,NM_001040710,NM_001040710,NM_001040710,NM_001040710,NM_001040710,NM_001040710	hyperM.iPSC
2	24566661	24566787	3	cg04335293,cg15138109,cg03879180	_,_	N_Shore,N_Shore,N_Shore	_,_	_,_	hypoM.iPSC
2	24995405	24995621	2	cg08266286,cg16888658	5'UTR;1stExon,TSS200	N_Shore,N_Shore	ADCY3;ADCY3,ADCY3	NM_004036;NM_004036,NM_004036	hyperM.iPSC
2	25003126	25003555	2	cg22480783,cg01884057	_,_	_,_	_,_	_,_	hyperM.iPSC
2	25237355	25238158	3	cg23809645,cg02716646,cg06846259	3'UTR;3'UTR,Body;Body,Body;Body	N_Shore,Island,Island	POMC;POMC,POMC;POMC,POMC;POMC	NM_000939;NM_001035256,NM_000939;NM_001035256,NM_000939;NM_001035256	hyperM.iPSC
2	25243889	25244044	4	cg09527270,cg03560973,cg02079741,cg09672383	5'UTR;5'UTR,5'UTR;5'UTR,5'UTR;5'UTR,5'UTR;5'UTR	N_Shore,N_Shore,N_Shore,N_Shore	POMC;POMC,POMC;POMC,POMC;POMC,POMC;POMC	NM_000939;NM_001035256,NM_000939;NM_001035256,NM_000939;NM_001035256,NM_000939;NM_001035256	hyperM.iPSC
2	25245215	25245415	4	cg24425171,cg16302441,cg08030082,cg09916783	TSS200;TSS200,TSS1500;TSS1500,TSS1500;TSS1500,TSS1500;TSS1500	Island,Island,Island,S_Shore	POMC;POMC,POMC;POMC,POMC;POMC,POMC;POMC	NM_000939;NM_001035256,NM_000939;NM_001035256,NM_000939;NM_001035256,NM_000939;NM_001035256	hypoM.iPSC
2	25326169	25327399	4	cg08316074,cg15150970,cg26544247,cg15843262	Body;Body;Body,Body;Body;Body,Body;Body;Body,Body;Body;Body	S_Shore,N_Shore,N_Shore,N_Shore	DNMT3A;DNMT3A;DNMT3A,DNMT3A;DNMT3A;DNMT3A,DNMT3A;DNMT3A;DNMT3A,DNMT3A;DNMT3A;DNMT3A	NM_022552;NM_175629;NM_153759,NM_022552;NM_175629;NM_153759,NM_022552;NM_175629;NM_153759,NM_022552;NM_175629;NM_153759	hypoM.iPSC
2	25380200	25380584	2	cg10614445,cg04683068	Body;Body;Body,Body;Body;Body	_,_	DNMT3A;DNMT3A;DNMT3A,DNMT3A;DNMT3A;DNMT3A	NM_022552;NM_175630;NM_175629,NM_022552;NM_175630;NM_175629	hypoM.iPSC
2	25416461	25416645	2	cg17207266,cg05896193	5'UTR;5'UTR;5'UTR,5'UTR;5'UTR;5'UTR	N_Shore,N_Shore	DNMT3A;DNMT3A;DNMT3A,DNMT3A;DNMT3A;DNMT3A	NM_022552;NM_175630;NM_175629,NM_022552;NM_175630;NM_175629	hypoM.iPSC
2	25419299	25419345	2	cg21629895,cg26470599	TSS1500;TSS1500;TSS1500,TSS1500;TSS1500;TSS1500	S_Shore,S_Shore	DNMT3A;DNMT3A;DNMT3A,DNMT3A;DNMT3A;DNMT3A	NM_022552;NM_175629;NM_175630,NM_022552;NM_175629;NM_175630	hypoM.iPSC
2	25439123	25439173	3	cg15575641,cg11309462,cg19512473	_,_	_,_	_,_	_,_	hyperM.iPSC
2	26374876	26374921	2	cg17696006,cg01010221	_,_	_,_	_,_	_,_	hypoM.iPSC
2	26395547	26395692	3	cg06634179,cg11170041,cg05907034	TSS200;TSS200;Body,TSS200;TSS1500;Body,TSS1500;TSS1500;Body	_,_	GPR113;GPR113;GPR113,GPR113;GPR113;GPR113,GPR113;GPR113;GPR113	NM_001145169;NM_001145168;NM_153835,NM_001145169;NM_001145168;NM_153835,NM_001145169;NM_001145168;NM_153835	hyperM.iPSC
2	26423301	26423648	4	cg23817529,cg06761303,cg00397585,cg10548272	TSS200;Body,TSS1500;Body,TSS1500;Body,TSS1500;Body	S_Shore,S_Shore,S_Shore,S_Shore	GPR113;SELI,GPR113;SELI,GPR113;SELI,GPR113;SELI	NM_153835;NM_033505,NM_153835;NM_033505,NM_153835;NM_033505,NM_153835;NM_033505	hyperM.iPSC
2	26634735	26635927	3	cg27305303,cg26900154,cg19764540	Body,TSS200,TSS1500	N_Shelf,N_Shelf,N_Shelf	OTOF,OTOF,OTOF	NM_194248,NM_194248,NM_194248	hyperM.iPSC
2	26639338	26639550	2	cg17265788,cg24478803	Body,Body	N_Shore,Island	C2orf70,C2orf70	NM_001105519,NM_001105519	hyperM.iPSC
2	26780940	26781197	2	cg01627597,cg14254480	Body,Body	_,_	KCNK3,KCNK3	NM_002246,NM_002246	hyperM.iPSC
2	26804460	26804634	2	cg23136742,cg27485108	Body,Body	Island,Island	KCNK3,KCNK3	NM_002246,NM_002246	hyperM.iPSC
2	26840996	26841324	2	cg01166564,cg23252243	Body,Body	Island,S_Shore	C2orf18,C2orf18	NM_017877,NM_017877	hyperM.iPSC
2	27154561	27155447	5	cg02804722,cg19399165,cg15895197,cg22047282,cg20516209	TSS1500,TSS200,1stExon;5'UTR,1stExon;5'UTR,1stExon	_,N_Shelf,N_Shelf,N_Shelf	EMILIN1,EMILIN1,EMILIN1;EMILIN1,EMILIN1;EMILIN1,EMILIN1	NM_007046,NM_007046,NM_007046;NM_007046,NM_007046;NM_007046,NM_007046	hyperM.iPSC
2	27225132	27225636	5	cg12209937,cg15326452,cg03265490,cg20405384,cg02602010	TSS1500,TSS200,TSS200,TSS200,1stExon	N_Shore,N_Shore,N_Shore,N_Shore,N_Shore	TCF23,TCF23,TCF23,TCF23,TCF23	NM_175769,NM_175769,NM_175769,NM_175769,NM_175769	hyperM.iPSC
2	27289339	27289615	4	cg05209527,cg23648904,cg21420531,cg01620785	TSS1500;Body;TSS1500;5'UTR;Body,TSS1500;Body;TSS1500;5'UTR;Body,TSS1500;Body;TSS1500;5'UTR;Body,TSS1500;Body;TSS1500;5'UTR;Body	S_Shore,S_Shore,S_Shore,S_Shore	SLC5A6;C2orf28;SLC5A6;C2orf28;C2orf28,SLC5A6;C2orf28;SLC5A6;C2orf28;C2orf28,SLC5A6;C2orf28;SLC5A6;C2orf28;C2orf28,SLC5A6;C2orf28;SLC5A6;C2orf28;C2orf28	NR_028323;NM_080592;NM_021095;NM_016085;NM_001170795,NR_028323;NM_080592;NM_021095;NM_016085;NM_001170795,NR_028323;NM_080592;NM_021095;NM_016085;NM_001170795,NR_028323;NM_080592;NM_021095;NM_016085;NM_001170795	hyperM.iPSC
2	27293419	27294268	2	cg09947274,cg01051318	3'UTR;3'UTR;TSS1500;3'UTR,Body	N_Shore,Island	C2orf28;C2orf28;CAD;C2orf28,CAD	NM_001170795;NM_080592;NM_004341;NM_016085,NM_004341	hyperM.iPSC
2	27382829	27383485	4	cg05901357,cg17689799,cg20842253,cg01985390	Body;Body,3'UTR;3'UTR,3'UTR;3'UTR,3'UTR;3'UTR	Island,Island,Island,Island	TRIM54;TRIM54,TRIM54;TRIM54,TRIM54;TRIM54,TRIM54;TRIM54	NM_032546;NM_187841,NM_032546;NM_187841,NM_032546;NM_187841,NM_032546;NM_187841	hyperM.iPSC
2	27453392	27454592	3	cg05696406,cg01373369,cg19141644	3'UTR,3'UTR,Body	N_Shore,N_Shore,N_Shore	SNX17,ZNF513,ZNF513	NM_014748,NM_144631,NM_144631	hyperM.iPSC
2	27486325	27486687	3	cg21709322,cg15661865,cg00494710	TSS1500;TSS1500,TSS1500;TSS1500,TSS1500;TSS1500	Island,S_Shore,S_Shore	PPM1G;PPM1G,PPM1G;PPM1G,PPM1G;PPM1G	NM_002707;NM_177983,NM_002707;NM_177983,NM_002707;NM_177983	hyperM.iPSC
2	27518521	27519215	10	cg18428193,cg24768116,cg12000995,cg12648201,cg21248554,cg17158414,cg02592271,cg11618577,cg20102877,cg26034919	TSS1500;3'UTR;TSS1500,TSS200;TSS200,TSS200;TSS200,TSS200;TSS200,TSS200;TSS200,1stExon;1stExon,Body;Body,Body;Body,Body;Body,Body;Body	Island,Island,Island,Island,Island,Island,Island,Island,Island,S_Shore	KRTCAP3;NRBP1;KRTCAP3,KRTCAP3;KRTCAP3,KRTCAP3;KRTCAP3,KRTCAP3;KRTCAP3,KRTCAP3;KRTCAP3,KRTCAP3;KRTCAP3,KRTCAP3;KRTCAP3,KRTCAP3;KRTCAP3,KRTCAP3;KRTCAP3,KRTCAP3;KRTCAP3	NM_173853;NM_013392;NM_001168364,NM_001168364;NM_173853,NM_001168364;NM_173853,NM_001168364;NM_173853,NM_001168364;NM_173853,NM_001168364;NM_173853,NM_001168364;NM_173853,NM_001168364;NM_173853,NM_001168364;NM_173853,NM_001168364;NM_173853	hypoM.iPSC
2	27565747	27566548	3	cg01744354,cg23591853,cg08787988	Body,TSS1500,TSS1500	N_Shore,S_Shore,S_Shore	IFT172,IFT172,IFT172	NM_015662,NM_015662,NM_015662	hyperM.iPSC
2	27572214	27573291	3	cg15062470,cg23586138,cg00498289	TSS1500;TSS1500,TSS1500;TSS200,1stExon	S_Shore,S_Shore,S_Shore	FNDC4;GCKR,FNDC4;GCKR,GCKR	NM_022823;NM_001486,NM_022823;NM_001486,NM_001486	hyperM.iPSC
2	27652228	27652915	3	cg23055682,cg02621154,cg10142452	TSS1500,TSS1500,5'UTR;1stExon	_,_	C2orf16,C2orf16,C2orf16;C2orf16	NM_032266,NM_032266,NM_032266;NM_032266	hyperM.iPSC
2	27659126	27660033	2	cg01464985,cg04151012	TSS1500,Body	N_Shore,S_Shore	ZNF512,ZNF512	NM_032434,NM_032434	hyperM.iPSC
2	27739570	27739583	2	cg06975196,cg24413391	TSS1500;5'UTR,TSS1500;5'UTR	N_Shore,N_Shore	SLC4A1AP;SUPT7L,SLC4A1AP;SUPT7L	NM_018158;NM_014860,NM_018158;NM_014860	hyperM.iPSC
2	27842289	27842362	2	cg20518572,cg07920525	_,_	_,_	_,_	_,_	hyperM.iPSC
2	27847769	27847829	2	cg27447296,cg02833916	TSS1500;TSS1500,TSS1500;TSS1500	N_Shore,N_Shore	MRPL33;MRPL33,MRPL33;MRPL33	NM_145330;NM_004891,NM_145330;NM_004891	hyperM.iPSC
2	27967548	27967853	4	cg00521934,cg08364093,cg00031476,cg15078838	5'UTR;TSS1500;5'UTR;5'UTR;5'UTR;5'UTR;TSS200,5'UTR;TSS1500;5'UTR;5'UTR;5'UTR;5'UTR;TSS200,5'UTR;TSS1500;TSS1500;5'UTR;5'UTR;5'UTR;5'UTR,5'UTR;TSS1500;TSS1500;5'UTR;5'UTR;5'UTR;5'UTR	S_Shore,S_Shore,S_Shore,S_Shore	BRE;RBKS;BRE;BRE;BRE;BRE;LOC100302650,BRE;RBKS;BRE;BRE;BRE;BRE;LOC100302650,BRE;RBKS;LOC100302650;BRE;BRE;BRE;BRE,BRE;RBKS;LOC100302650;BRE;BRE;BRE;BRE	NM_199193;NM_022128;NM_199192;NM_199194;NM_199191;NM_004899;NR_028308,NM_199193;NM_022128;NM_199192;NM_199194;NM_199191;NM_004899;NR_028308,NM_199193;NM_022128;NR_028308;NM_199192;NM_199194;NM_199191;NM_004899,NM_199193;NM_022128;NR_028308;NM_199192;NM_199194;NM_199191;NM_004899	hyperM.iPSC
2	28403926	28404035	2	cg06254729,cg17862837	3'UTR;3'UTR;Body;Body;3'UTR,3'UTR;3'UTR;Body;Body;3'UTR	_,_	BRE;BRE;BRE;BRE;BRE,BRE;BRE;BRE;BRE;BRE	NM_199193;NM_004899;NM_199191;NM_199194;NM_199192,NM_199193;NM_004899;NM_199191;NM_199194;NM_199192	hyperM.iPSC
2	28471832	28472598	3	cg25784219,cg08836542,cg24397007	Body,Body,Body	S_Shore,S_Shelf,S_Shelf	FOSL2,FOSL2,FOSL2	NM_005253,NM_005253,NM_005253	hyperM.iPSC
2	28571134	28571974	2	cg14628982,cg06061442	TSS1500;TSS1500,TSS1500;TSS1500	_,_	PLB1;PLB1,PLB1;PLB1	NM_001170585;NM_153021,NM_001170585;NM_153021	hyperM.iPSC
2	28827081	28827681	3	cg06142740,cg16276199,cg09522027	TSS1500;TSS1500,TSS1500;TSS1500,TSS1500;TSS1500	N_Shore,N_Shore,N_Shore	PPP1CB;PPP1CB,PPP1CB;PPP1CB,PPP1CB;PPP1CB	NM_206876;NM_002709,NM_206876;NM_002709,NM_206876;NM_002709	hyperM.iPSC
2	29056734	29058199	4	cg16944977,cg25139410,cg11311289,cg05707236	TSS1500,TSS200,TSS200,5'UTR	_,_	FAM179A,FAM179A,FAM179A,FAM179A	NM_199280,NM_199280,NM_199280,NM_199280	hyperM.iPSC
2	29995567	29996246	4	cg16699354,cg03602297,cg00643897,cg10179251	Body,Body,Body,Body	N_Shore,N_Shore,N_Shore,N_Shore	ALK,ALK,ALK,ALK	NM_004304,NM_004304,NM_004304,NM_004304	hyperM.iPSC
2	33212785	33213192	5	cg15135286,cg13652008,cg03906115,cg08357990,cg14102437	Body;TSS1500;TSS1500;TSS1500;TSS1500,Body;TSS1500;TSS1500;TSS1500;TSS1500,TSS200;TSS200;Body;TSS200;TSS200,TSS200;TSS200;Body;TSS200;TSS200,1stExon;5'UTR;5'UTR;5'UTR;1stExon;Body;1stExon;1stExon;5'UTR	_,_	LTBP1;LTBP1;LTBP1;LTBP1;LTBP1,LTBP1;LTBP1;LTBP1;LTBP1;LTBP1,LTBP1;LTBP1;LTBP1;LTBP1;LTBP1,LTBP1;LTBP1;LTBP1;LTBP1;LTBP1,LTBP1;LTBP1;LTBP1;LTBP1;LTBP1;LTBP1;LTBP1;LTBP1;LTBP1	NM_206943;NM_001166266;NM_001166265;NM_001166264;NM_000627,NM_206943;NM_001166266;NM_001166265;NM_001166264;NM_000627,NM_001166265;NM_000627;NM_206943;NM_001166264;NM_001166266,NM_001166265;NM_000627;NM_206943;NM_001166264;NM_001166266,NM_001166264;NM_000627;NM_001166266;NM_001166264;NM_000627;NM_206943;NM_001166265;NM_001166266;NM_001166265	hyperM.iPSC
2	33554624	33555209	4	cg22053452,cg03693861,cg08852759,cg01247919	5'UTR;TSS200,5'UTR;TSS200,5'UTR;TSS200,1stExon;5'UTR;5'UTR	_,_	RASGRP3;RASGRP3,RASGRP3;RASGRP3,RASGRP3;RASGRP3,RASGRP3;RASGRP3;RASGRP3	NM_170672;NM_001139488,NM_170672;NM_001139488,NM_170672;NM_001139488,NM_001139488;NM_001139488;NM_170672	hyperM.iPSC
2	36776590	36777332	2	cg26638266,cg09154591	TSS1500,TSS200	_,_	VIT,VIT	NM_053276,NM_053276	hyperM.iPSC
2	37237072	37238212	5	cg17326313,cg01617117,cg05332270,cg16795804,cg14126601	5'UTR;5'UTR,TSS200;TSS200,TSS1500;TSS1500,TSS1500;TSS1500,TSS1500;TSS1500	N_Shore,Island,Island,S_Shore,S_Shore	EIF2AK2;EIF2AK2,EIF2AK2;EIF2AK2,EIF2AK2;EIF2AK2,EIF2AK2;EIF2AK2,EIF2AK2;EIF2AK2	NM_002759;NM_001135651,NM_001135651;NM_002759,NM_002759;NM_001135651,NM_002759;NM_001135651,NM_002759;NM_001135651	hyperM.iPSC
2	37277519	37277864	2	cg23687288,cg27547873	_,_	Island,Island	_,_	_,_	hyperM.iPSC
2	37425191	37425927	2	cg09839443,cg20091297	TSS200,Body	Island,S_Shore	QPCT,QPCT	NM_012413,NM_012413	hyperM.iPSC
2	38154211	38155734	4	cg00565882,cg06264984,cg20254225,cg01410359	Body,Body,Body,Body	N_Shore,N_Shore,Island,Island	CYP1B1,CYP1B1,CYP1B1,CYP1B1	NM_000104,NM_000104,NM_000104,NM_000104	hypoM.iPSC
2	38616218	38616634	2	cg09047034,cg23078928	_,_	N_Shore,Island	_,_	_,_	hyperM.iPSC
2	38746350	38746405	3	cg19391498,cg05275752,cg01546378	TSS1500,TSS200,TSS200	_,_	GALM,GALM,GALM	NM_138801,NM_138801,NM_138801	hyperM.iPSC
2	38859338	38859697	2	cg26680517,cg24047736	5'UTR,Body	_,_	GEMIN6,GEMIN6	NM_024775,NM_024775	hyperM.iPSC
2	39041386	39041510	2	cg17165695,cg03690080	Body;TSS1500,Body;TSS1500	Island,S_Shore	LOC100271715;LOC375196,LOC100271715;LOC375196	NM_001145451;NR_028386,NM_001145451;NR_028386	hypoM.iPSC
2	39518473	39518690	2	cg01893669,cg11491749	TSS1500,TSS1500	S_Shore,S_Shore	MAP4K3,MAP4K3	NM_003618,NM_003618	hyperM.iPSC
2	39860047	39860395	3	cg22354234,cg20224517,cg05136531	TSS200;TSS200,TSS200;TSS200,TSS1500;TSS1500	S_Shore,S_Shore,S_Shore	THUMPD2;THUMPD2,THUMPD2;THUMPD2,THUMPD2;THUMPD2	NM_025264;NR_028102,NM_025264;NR_028102,NM_025264;NR_028102	hyperM.iPSC
2	40512395	40512422	2	cg10103850,cg22409100	TSS1500;5'UTR;TSS1500;TSS1500,TSS1500;5'UTR;TSS1500;TSS1500	_,_	SLC8A1;SLC8A1;SLC8A1;SLC8A1,SLC8A1;SLC8A1;SLC8A1;SLC8A1	NM_001112801;NM_001112802;NM_021097;NM_001112800,NM_001112801;NM_001112802;NM_021097;NM_001112800	hyperM.iPSC
2	40531605	40531746	2	cg23601376,cg10633958	5'UTR,5'UTR	N_Shore,N_Shore	SLC8A1,SLC8A1	NM_001112802,NM_001112802	hyperM.iPSC
2	42028845	42028855	2	cg18011517,cg21708738	_,_	_,_	_,_	_,_	hypoM.iPSC
2	42082529	42082683	3	cg19376973,cg27252766,cg27428208	_,_	_,_	_,_	_,_	hyperM.iPSC
2	42130492	42131344	3	cg13773247,cg25353287,cg22476504	Body,Body,Body	_,_	PKDCC,PKDCC,PKDCC	NM_138370,NM_138370,NM_138370	hyperM.iPSC
2	42181914	42182441	2	cg14882311,cg02942766	_,_	Island,N_Shore	_,_	_,_	hyperM.iPSC
2	42573182	42573437	3	cg21129729,cg04580179,cg06638795	Body;Body,Body;Body,Body;Body	N_Shore,Island,Island	KCNG3;KCNG3,KCNG3;KCNG3,KCNG3;KCNG3	NM_133329;NM_172344,NM_133329;NM_172344,NM_133329;NM_172344	hypoM.iPSC
2	42844847	42844926	2	cg13820899,cg19507032	5'UTR;1stExon,TSS200	_,_	OXER1;OXER1,OXER1	NM_148962;NM_148962,NM_148962	hyperM.iPSC
2	42872988	42873118	2	cg09256201,cg20289949	Body,1stExon	N_Shore,N_Shore	HAAO,HAAO	NM_012205,NM_012205	hyperM.iPSC
2	42908159	42908344	3	cg03291455,cg23328647,cg02402637	_,_	N_Shore,Island,Island	_,_	_,_	hyperM.iPSC
2	43042343	43042444	3	cg05370101,cg23008718,cg21514164	_,_	_,_	_,_	_,_	hyperM.iPSC
2	43181441	43182161	3	cg03125400,cg05672223,cg00909401	_,_	Island,Island,S_Shore	_,_	_,_	hypoM.iPSC
2	43304469	43305372	3	cg00968638,cg09983326,cg08193650	3'UTR,3'UTR,Body	N_Shore,N_Shore,Island	ZFP36L2,ZFP36L2,ZFP36L2	NM_006887,NM_006887,NM_006887	hyperM.iPSC
2	43756731	43757515	5	cg17110364,cg09132607,cg02111748,cg20563666,cg08726338	Body;1stExon,Body;TSS200,Body;TSS200,Body;TSS1500,Body;TSS1500	_,_	PLEKHH2;LOC728819,PLEKHH2;LOC728819,PLEKHH2;LOC728819,PLEKHH2;LOC728819,PLEKHH2;LOC728819	NM_172069;NM_001101330,NM_172069;NM_001101330,NM_172069;NM_001101330,NM_172069;NM_001101330,NM_172069;NM_001101330	hyperM.iPSC
2	43918782	43919798	3	cg11467440,cg22207732,cg19123339	Body;TSS1500,TSS1500;1stExon,TSS1500;Body	_,_	ABCG5;ABCG8,ABCG8;ABCG5,ABCG5;ABCG8	NM_022436;NM_022437,NM_022437;NM_022436,NM_022436;NM_022437	hyperM.iPSC
2	44881729	44882108	4	cg03593578,cg05961294,cg13441058,cg10069809	_,_	N_Shore,N_Shore,N_Shore,N_Shore	_,_	_,_	hypoM.iPSC
2	44883840	44883888	2	cg25093813,cg25149238	_,_	S_Shore,S_Shore	_,_	_,_	hypoM.iPSC
2	45010146	45014058	9	cg17980283,cg23424933,cg12387205,cg16668359,cg26648203,cg02183025,cg07616374,cg01362243,cg03361102	_,_	Island,S_Shore,N_Shore,N_Shore,N_Shore,N_Shore,N_Shore,N_Shore,N_Shore	_,_	_,_	hypoM.iPSC
2	45020388	45021053	2	cg21199165,cg02372786	_,TSS1500	S_Shore,N_Shore	_,SIX3	_,NM_005413	hypoM.iPSC
2	45024229	45027052	9	cg25104437,cg13975344,cg04797742,cg02120584,cg03717442,cg16509777,cg23245620,cg08456817,cg02863169	Body,Body,Body,Body,3'UTR,3'UTR,3'UTR,_	Island,Island,Island,Island,S_Shore,S_Shore,S_Shore,S_Shore,S_Shore	SIX3,SIX3,SIX3,SIX3,SIX3,SIX3,SIX3,_	NM_005413,NM_005413,NM_005413,NM_005413,NM_005413,NM_005413,NM_005413,_	hypoM.iPSC
2	45086145	45087644	6	cg07834682,cg11358114,cg24887265,cg09019410,cg23413809,cg04364219	3'UTR,Body,Body,Body,Body,Body	S_Shore,S_Shore,N_Shore,N_Shore,N_Shore,N_Shore	SIX2,SIX2,SIX2,SIX2,SIX2,SIX2	NM_016932,NM_016932,NM_016932,NM_016932,NM_016932,NM_016932	hypoM.iPSC
2	45088912	45089016	2	cg03646261,cg05847586	Body,Body	N_Shore,Island	SIX2,SIX2	NM_016932,NM_016932	hypoM.iPSC
2	45251306	45251885	4	cg14223654,cg20201270,cg16619576,cg01572940	_,_	Island,Island,Island,S_Shore	_,_	_,_	hypoM.iPSC
2	46381027	46381462	2	cg07901411,cg15129144	Body,Body	S_Shore,S_Shore	EPAS1,EPAS1	NM_001430,NM_001430	hypoM.iPSC
2	46466468	46467048	2	cg22488486,cg25941751	3'UTR,3'UTR	_,_	EPAS1,EPAS1	NM_001430,NM_001430	hyperM.iPSC
2	46600354	46600883	2	cg26643047,cg27485921	1stExon;5'UTR,TSS1500	_,_	ATP6V1E2;ATP6V1E2,ATP6V1E2	NM_080653;NM_080653,NM_080653	hyperM.iPSC
2	46621534	46621615	2	cg22137471,cg22307974	_,_	N_Shore,N_Shore	_,_	_,_	hyperM.iPSC
2	46908337	46908467	2	cg22013055,cg27485075	TSS200,TSS200	_,_	LOC100134259,LOC100134259	NR_024452,NR_024452	hyperM.iPSC
2	47235956	47235966	2	cg14201617,cg17263716	1stExon;1stExon;5'UTR;5'UTR,1stExon;1stExon;5'UTR;5'UTR	_,_	C2orf61;C2orf61;C2orf61;C2orf61,C2orf61;C2orf61;C2orf61;C2orf61	NM_001163561;NM_173649;NM_001163561;NM_173649,NM_001163561;NM_173649;NM_001163561;NM_173649	hyperM.iPSC
2	47601546	47602564	4	cg04175739,cg14556391,cg00042186,cg19614911	3'UTR,Body,Body,Body	Island,Island,Island,Island	KCNK12,KCNK12,KCNK12,KCNK12	NM_022055,NM_022055,NM_022055,NM_022055	hyperM.iPSC
2	47652669	47653897	4	cg04943225,cg14758072,cg10903274,cg04735632	_,_	Island,S_Shore,S_Shore,S_Shore	_,_	_,_	hyperM.iPSC
2	48697149	48697699	2	cg00451397,cg12300939	TSS1500;TSS1500;Body,TSS1500;TSS1500;Body	N_Shore,N_Shore	GTF2A1L;GTF2A1L;STON1-GTF2A1L,GTF2A1L;GTF2A1L;STON1-GTF2A1L	NM_172196;NM_006872;NM_172311,NM_172196;NM_006872;NM_172311	hyperM.iPSC
2	48836454	48836693	3	cg19403014,cg12351433,cg18923472	TSS200,TSS200,TSS1500	Island,Island,S_Shore	LHCGR,LHCGR,LHCGR	NM_000233,NM_000233,NM_000233	hypoM.iPSC
2	51113903	51114243	2	cg00345522,cg23273041	TSS1500;TSS1500,TSS1500;TSS1500	_,_	NRXN1;NRXN1,NRXN1;NRXN1	NM_001135659;NM_004801,NM_001135659;NM_004801	hyperM.iPSC
2	53868736	53868822	2	cg06382698,cg14669921	Body;Body;TSS1500;TSS1500;Body;Body,Body;Body;TSS1500;TSS1500;Body;Body	S_Shore,S_Shore	LOC100302652;ERLEC1;ASB3;ASB3;ERLEC1;ERLEC1,LOC100302652;ERLEC1;ASB3;ASB3;ERLEC1;ERLEC1	NM_001164165;NM_001127397;NM_016115;NM_145863;NM_001127398;NM_015701,NM_001164165;NM_001127397;NM_016115;NM_145863;NM_001127398;NM_015701	hyperM.iPSC
2	54714107	54714951	2	cg25407528,cg15706621	Body;Body,Body;Body	_,_	SPTBN1;SPTBN1,SPTBN1;SPTBN1	NM_178313;NM_003128,NM_178313;NM_003128	hyperM.iPSC
2	54754414	54754559	3	cg04678916,cg20341504,cg14919082	_,_	_,_	_,_	_,_	hyperM.iPSC
2	55362654	55363283	3	cg11444607,cg07166800,cg18958844	TSS1500,Body,Body	N_Shore,Island,S_Shore	PRDXDD1P,PRDXDD1P,PRDXDD1P	NR_027258,NR_027258,NR_027258	hyperM.iPSC
2	55601137	55601279	3	cg06046912,cg22361914,cg08264638	Body,Body,Body	S_Shore,S_Shore,S_Shore	CCDC104,CCDC104,CCDC104	NM_080667,NM_080667,NM_080667	hyperM.iPSC
2	56263701	56264284	6	cg01312858,cg03896589,cg17611074,cg00636072,cg08096062,cg11572305	TSS1500,TSS1500,TSS1500,TSS1500,TSS1500,TSS1500	N_Shore,N_Shore,N_Shore,N_Shore,N_Shore,N_Shore	CCDC85A,CCDC85A,CCDC85A,CCDC85A,CCDC85A,CCDC85A	NM_001080433,NM_001080433,NM_001080433,NM_001080433,NM_001080433,NM_001080433	hyperM.iPSC
2	56266573	56266757	2	cg17501259,cg10664190	Body,Body	S_Shore,S_Shore	CCDC85A,CCDC85A	NM_001080433,NM_001080433	hyperM.iPSC
2	58126924	58127056	3	cg03092551,cg20604286,cg18998670	TSS1500;TSS1500;TSS1500;TSS1500;TSS1500;TSS1500,TSS1500;TSS1500;TSS1500;TSS1500;TSS1500;TSS1500,TSS200;TSS200;TSS200;TSS1500;TSS200;TSS200	N_Shore,N_Shore,N_Shore	VRK2;VRK2;VRK2;VRK2;VRK2;VRK2,VRK2;VRK2;VRK2;VRK2;VRK2;VRK2,VRK2;VRK2;VRK2;VRK2;VRK2;VRK2	NM_001130483;NM_001130482;NM_001130481;NM_001136027;NM_006296;NM_001130480,NM_001130483;NM_001130482;NM_001130481;NM_001136027;NM_006296;NM_001130480,NM_001130483;NM_001130481;NM_001130480;NM_001136027;NM_001130482;NM_006296	hyperM.iPSC
2	60379015	60379113	2	cg13048171,cg07222022	_,_	_,_	_,_	_,_	hyperM.iPSC
2	60534120	60534265	2	cg23556108,cg15241316	Body;Body,Body;Body	_,_	BCL11A;BCL11A,BCL11A;BCL11A	NM_138559;NM_018014,NM_138559;NM_018014	hypoM.iPSC
2	60608863	60609247	2	cg16951074,cg17935536	Body;Body;Body,Body;Body;Body	_,_	BCL11A;BCL11A;BCL11A,BCL11A;BCL11A;BCL11A	NM_022893;NM_138559;NM_018014,NM_022893;NM_138559;NM_018014	hyperM.iPSC
2	61146111	61146128	2	cg19770944,cg22597665	TSS1500;TSS1500,TSS1500;TSS1500	N_Shore,N_Shore	KIAA1841;KIAA1841,KIAA1841;KIAA1841	NM_032506;NM_001129993,NM_032506;NM_001129993	hyperM.iPSC
2	61259995	61260918	3	cg06949933,cg22934200,cg25451194	5'UTR,5'UTR,5'UTR	S_Shore,S_Shore,S_Shelf	AHSA2,AHSA2,AHSA2	NM_152392,NM_152392,NM_152392	hyperM.iPSC
2	62275855	62276193	2	cg18206867,cg02602480	TSS1500,TSS1500	Island,Island	B3GNT2,B3GNT2	NM_006577,NM_006577	hyperM.iPSC
2	62651369	62651430	2	cg27227250,cg04036593	_,_	_,_	_,_	_,_	hypoM.iPSC
2	63124328	63125838	7	cg06808305,cg21960191,cg12395259,cg15774864,cg03955927,cg00166234,cg22727572	Body;Body;Body;Body,Body;Body;Body;Body;Body,Body;Body;Body;Body;Body,Body;Body;Body;Body;Body,Body;Body;Body;Body;Body,Body;Body;Body;Body;Body,Body;Body;Body;Body;Body	N_Shore,N_Shore,N_Shore,Island,Island,Island,Island	EHBP1;EHBP1;EHBP1;EHBP1,LOC100132215;EHBP1;EHBP1;EHBP1;EHBP1,LOC100132215;EHBP1;EHBP1;EHBP1;EHBP1,LOC100132215;EHBP1;EHBP1;EHBP1;EHBP1,LOC100132215;EHBP1;EHBP1;EHBP1;EHBP1,LOC100132215;EHBP1;EHBP1;EHBP1;EHBP1,LOC100132215;EHBP1;EHBP1;EHBP1;EHBP1	NM_001142616;NM_001142615;NM_001142614;NM_015252,NR_027069;NM_001142616;NM_001142615;NM_001142614;NM_015252,NR_027069;NM_001142616;NM_001142615;NM_001142614;NM_015252,NR_027069;NM_001142616;NM_001142615;NM_001142614;NM_015252,NR_027069;NM_001142616;NM_001142615;NM_001142614;NM_015252,NR_027069;NM_001142616;NM_001142615;NM_001142614;NM_015252,NR_027069;NM_001142616;NM_001142615;NM_001142614;NM_015…	hypoM.iPSC
2	63126940	63130227	15	cg17397364,cg02046665,cg10814803,cg25518132,cg15732840,cg15402210,cg17583946,cg20585676,cg01156077,cg13433250,cg00445126,cg22197050,cg14174204,cg10658666,cg08210688	Body;3'UTR;3'UTR;3'UTR;3'UTR,Body,Body,Body,Body,TSS200,TSS200,TSS200,TSS1500,TSS1500,TSS1500,TSS1500,TSS1500,TSS1500,TSS1500	N_Shore,N_Shore,N_Shore,Island,Island,Island,Island,Island,Island,Island,Island,Island,Island,Island,Island	LOC100132215;EHBP1;EHBP1;EHBP1;EHBP1,LOC100132215,LOC100132215,LOC100132215,LOC100132215,LOC100132215,LOC100132215,LOC100132215,LOC100132215,LOC100132215,LOC100132215,LOC100132215,OTX1,OTX1,OTX1	NR_027069;NM_001142616;NM_015252;NM_001142615;NM_001142614,NR_027069,NR_027069,NR_027069,NR_027069,NR_027069,NR_027069,NR_027069,NR_027069,NR_027069,NR_027069,NR_027069,NM_014562,NM_014562,NM_014562	hypoM.iPSC
2	63132335	63135547	11	cg00431699,cg16595607,cg10271192,cg04276301,cg15026634,cg22732253,cg02606423,cg10640333,cg27364741,cg00445405,cg00463767	5'UTR,5'UTR,5'UTR,5'UTR,5'UTR,Body,Body,Body,Body,Body,Body	Island,N_Shore,N_Shore,N_Shore,N_Shore,N_Shore,N_Shore,N_Shore,Island,N_Shore,N_Shore	OTX1,OTX1,OTX1,OTX1,OTX1,OTX1,OTX1,OTX1,OTX1,OTX1,OTX1	NM_014562,NM_014562,NM_014562,NM_014562,NM_014562,NM_014562,NM_014562,NM_014562,NM_014562,NM_014562,NM_014562	hypoM.iPSC
2	63136859	63139350	6	cg14604681,cg07938743,cg22666373,cg22303418,cg17145370,cg07617338	Body,3'UTR,_	N_Shore,Island,N_Shore,N_Shore,N_Shore,N_Shore	OTX1,OTX1,_	NM_014562,NM_014562,_	hypoM.iPSC
2	64284749	64284974	2	cg19017142,cg11238542	_,_	_,_	_,_	_,_	hyperM.iPSC
2	64687610	64687934	3	cg02598079,cg26575450,cg03517776	_,_	N_Shelf,N_Shore,N_Shore	_,_	_,_	hyperM.iPSC
2	64689739	64690522	2	cg02270689,cg15928347	_,_	Island,S_Shore	_,_	_,_	hypoM.iPSC
2	64717084	64717155	2	cg12734023,cg15742737	Body,Body	_,_	SERTAD2,SERTAD2	NM_014755,NM_014755	hyperM.iPSC
2	64938747	64939268	3	cg10017626,cg15612257,cg00810971	_,_	N_Shore,N_Shore,N_Shore	_,_	_,_	hyperM.iPSC
2	64954076	64954174	2	cg03443986,cg05927830	_,_	_,_	_,_	_,_	hyperM.iPSC
2	65068129	65068867	3	cg03233656,cg12682392,cg27362103	TSS1500,TSS1500;TSS1500,TSS1500;TSS1500	N_Shore,N_Shore,N_Shore	SLC1A4,SLC1A4;SLC1A4,SLC1A4;SLC1A4	NM_001135581,NM_003038;NM_001135581,NM_003038;NM_001135581	hyperM.iPSC
2	65071032	65071127	2	cg19220282,cg20698421	Body;5'UTR,Body;5'UTR	S_Shore,S_Shore	SLC1A4;SLC1A4,SLC1A4;SLC1A4	NM_003038;NM_001135581,NM_003038;NM_001135581	hyperM.iPSC
2	65373239	65373314	2	cg13224852,cg15986251	_,_	_,_	_,_	_,_	hyperM.iPSC
2	65447265	65448394	6	cg01751245,cg09884146,cg08467103,cg26376241,cg00622105,cg14480116	5'UTR;1stExon;Body,5'UTR;1stExon;Body,TSS200;Body,TSS200;Body,TSS1500;Body,TSS1500;Body	_,_	SPRED2;SPRED2;SPRED2,SPRED2;SPRED2;SPRED2,SPRED2;SPRED2,SPRED2;SPRED2,SPRED2;SPRED2,SPRED2;SPRED2	NM_001128210;NM_001128210;NM_181784,NM_001128210;NM_001128210;NM_181784,NM_001128210;NM_181784,NM_001128210;NM_181784,NM_001128210;NM_181784,NM_001128210;NM_181784	hyperM.iPSC
2	66507641	66508148	2	cg17775091,cg11807280	_,_	Island,S_Shore	_,_	_,_	hypoM.iPSC
2	66512852	66512978	2	cg23279522,cg04768935	_,_	N_Shore,N_Shore	_,_	_,_	hypoM.iPSC
2	66524982	66527489	8	cg01271812,cg09550083,cg06994420,cg10464312,cg06833110,cg02551743,cg04751149,cg08238215	Body,Body,Body,Body,Body,Body,Body,Body	N_Shore,N_Shore,Island,Island,Island,Island,Island,S_Shore	MEIS1,MEIS1,MEIS1,MEIS1,MEIS1,MEIS1,MEIS1,MEIS1	NM_002398,NM_002398,NM_002398,NM_002398,NM_002398,NM_002398,NM_002398,NM_002398	hypoM.iPSC
2	66657649	66659443	8	cg06820388,cg10736654,cg22112267,cg15135762,cg21568106,cg16298760,cg11653134,cg13851508	_,_	Island,Island,Island,S_Shore,S_Shore,S_Shore,S_Shore,S_Shore	_,_	_,_	hypoM.iPSC
2	66661765	66664110	8	cg16865953,cg22827063,cg03478122,cg02963248,cg10552446,cg01020413,cg01721569,cg02676167	_,_	N_Shore,Island,Island,S_Shore,S_Shore,S_Shore,S_Shore,S_Shore	_,_	_,_	hypoM.iPSC
2	67166018	67166041	2	cg09333522,cg02624836	_,_	_,_	_,_	_,_	hyperM.iPSC
2	68400760	68400853	3	cg10908369,cg05894910,cg10021043	TSS200;TSS200,TSS200;TSS200,TSS200;TSS200	S_Shore,S_Shore,S_Shore	CNRIP1;CNRIP1,CNRIP1;CNRIP1,CNRIP1;CNRIP1	NM_001111101;NM_015463,NM_001111101;NM_015463,NM_001111101;NM_015463	hyperM.iPSC
2	68445849	68445853	2	cg02861056,cg13060970	1stExon;5'UTR,1stExon;5'UTR	_,_	PLEK;PLEK,PLEK;PLEK	NM_002664;NM_002664,NM_002664;NM_002664	hyperM.iPSC
2	68814160	68814999	2	cg15700582,cg25887844	TSS1500;TSS1500,TSS1500;TSS1500	_,_	ARHGAP25;ARHGAP25,ARHGAP25;ARHGAP25	NM_001166277;NM_001007231,NM_001166277;NM_001007231	hyperM.iPSC
2	68855278	68855882	5	cg27278086,cg15361661,cg12093662,cg25070482,cg05395210	Body;TSS200;TSS200;Body,Body;TSS200;TSS200;Body,Body;TSS200;TSS200;Body,5'UTR;Body;1stExon;5'UTR;1stExon;Body,Body;1stExon;1stExon;Body	_,_	ARHGAP25;ARHGAP25;ARHGAP25;ARHGAP25,ARHGAP25;ARHGAP25;ARHGAP25;ARHGAP25,ARHGAP25;ARHGAP25;ARHGAP25;ARHGAP25,ARHGAP25;ARHGAP25;ARHGAP25;ARHGAP25;ARHGAP25;ARHGAP25,ARHGAP25;ARHGAP25;ARHGAP25;ARHGAP25	NM_001007231;NM_014882;NM_001166276;NM_001166277,NM_001007231;NM_014882;NM_001166276;NM_001166277,NM_001007231;NM_014882;NM_001166276;NM_001166277,NM_014882;NM_001007231;NM_014882;NM_001166276;NM_001166276;NM_001166277,NM_001007231;NM_014882;NM_001166276;NM_001166277	hyperM.iPSC
2	68953088	68953623	2	cg16980530,cg10881615	TSS1500,TSS1500	_,_	BMP10,BMP10	NM_014482,NM_014482	hyperM.iPSC
2	69518373	69518636	2	cg20547295,cg11644052	TSS200;TSS200;TSS200;TSS200,TSS1500;TSS1500;TSS1500;TSS1500	S_Shore,S_Shore	NFU1;NFU1;NFU1;NFU1,NFU1;NFU1;NFU1;NFU1	NM_001002757;NM_001002756;NM_001002755;NM_015700,NM_015700;NM_001002755;NM_001002757;NM_001002756	hyperM.iPSC
2	69823095	69823798	3	cg05720666,cg11942603,cg12518775	5'UTR,5'UTR,5'UTR	Island,S_Shore,S_Shore	ANXA4,ANXA4,ANXA4	NM_001153,NM_001153,NM_001153	hyperM.iPSC
2	69974440	69975744	3	cg18537085,cg12430078,cg14608581	TSS200,Body,Body	_,_	SNRNP27,SNRNP27,SNRNP27	NM_006857,NM_006857,NM_006857	hyperM.iPSC
2	69996442	69996967	2	cg13915702,cg04873188	Body,Body	Island,S_Shore	MXD1,MXD1	NM_002357,NM_002357	hyperM.iPSC
2	70871049	70871552	4	cg22650617,cg00469856,cg26095658,cg27641317	1stExon,1stExon,TSS200,TSS1500	Island,Island,Island,S_Shore	FIGLA,FIGLA,FIGLA,FIGLA	NM_001004311,NM_001004311,NM_001004311,NM_001004311	hypoM.iPSC
2	70969919	70970273	4	cg18144593,cg07852231,cg18867200,cg26307926	_,_	Island,S_Shore,S_Shore,S_Shore	_,_	_,_	hypoM.iPSC
2	70971800	70972331	2	cg07457305,cg13607218	_,_	S_Shore,S_Shelf	_,_	_,_	hypoM.iPSC
2	70977978	70978990	4	cg10540626,cg04063045,cg03711129,cg09543478	_,_	N_Shelf,N_Shelf,N_Shore,N_Shore	_,_	_,_	hypoM.iPSC
2	70980013	70980233	5	cg14606431,cg07094440,cg23644992,cg25413843,cg25032342	TSS1500,TSS1500,TSS1500,TSS1500,TSS1500	N_Shore,N_Shore,N_Shore,N_Shore,Island	VAX2,VAX2,VAX2,VAX2,VAX2	NM_012476,NM_012476,NM_012476,NM_012476,NM_012476	hypoM.iPSC
2	70982505	70982797	2	cg06086887,cg05021771	Body,Body	Island,N_Shore	VAX2,VAX2	NM_012476,NM_012476	hypoM.iPSC
2	70984709	70986026	6	cg14265704,cg05603527,cg13519863,cg13936863,cg14235768,cg19699289	Body,Body,Body,Body,Body,Body	Island,Island,Island,Island,Island,S_Shore	VAX2,VAX2,VAX2,VAX2,VAX2,VAX2	NM_012476,NM_012476,NM_012476,NM_012476,NM_012476,NM_012476	hypoM.iPSC
2	70988032	70988202	3	cg02322373,cg01109169,cg19907796	Body,Body,Body	N_Shore,Island,Island	VAX2,VAX2,VAX2	NM_012476,NM_012476,NM_012476	hypoM.iPSC
2	71065665	71066012	2	cg04076766,cg22050950	3'UTR;Body,3'UTR;3'UTR	_,_	ANKRD53;ANKRD53,ANKRD53;ANKRD53	NM_024933;NM_001115116,NM_024933;NM_001115116	hypoM.iPSC
2	71676992	71677025	2	cg12245706,cg14196395	Body;Body;Body;Body;Body;Body;Body;Body;Body;Body;Body;Body;Body;Body,Body;Body;Body;Body;Body;Body;Body;Body;Body;Body;Body;Body;Body;Body	_,_	DYSF;DYSF;DYSF;DYSF;DYSF;DYSF;DYSF;DYSF;DYSF;DYSF;DYSF;DYSF;DYSF;DYSF,DYSF;DYSF;DYSF;DYSF;DYSF;DYSF;DYSF;DYSF;DYSF;DYSF;DYSF;DYSF;DYSF;DYSF	NM_001130455;NM_001130979;NM_001130980;NM_001130982;NM_001130976;NM_001130987;NM_001130986;NM_001130981;NM_001130984;NM_001130983;NM_001130978;NM_001130985;NM_003494;NM_001130977,NM_001130455;NM_001130979;NM_001130980;NM_001130982;NM_001130976;NM_001130987;NM_001130986;NM_001130981;NM_001130984;NM_001130983;NM_001130978;NM_001130985;NM_003494;NM_001130977	hyperM.iPSC
2	71932146	71933117	7	cg04674832,cg07258910,cg21513009,cg24516106,cg09467436,cg25705148,cg01361021	_,_	N_Shore,N_Shore,N_Shore,Island,Island,Island,Island	_,_	_,_	hyperM.iPSC
2	72224985	72225060	2	cg22540115,cg17498867	Body,Body	Island,Island	CYP26B1,CYP26B1	NM_019885,NM_019885	hypoM.iPSC
2	73781218	73782000	2	cg10066188,cg03862705	1stExon;3'UTR,TSS200	_,_	NAT8B;NAT8B,NAT8B	NM_016347;NM_016347,NM_016347	hyperM.iPSC
2	73783142	73783273	2	cg07899983,cg01790530	TSS1500,TSS1500	_,_	NAT8B,NAT8B	NM_016347,NM_016347	hyperM.iPSC
2	73818216	73818342	4	cg05730099,cg22338307,cg00762659,cg10995755	TSS200,TSS1500,TSS1500,TSS1500	S_Shore,S_Shore,S_Shore,S_Shore	TPRKB,TPRKB,TPRKB,TPRKB	NM_016058,NM_016058,NM_016058,NM_016058	hyperM.iPSC
2	74064365	74064468	3	cg02251243,cg19445690,cg05981785	_,_	N_Shore,N_Shore,N_Shore	_,_	_,_	hypoM.iPSC
2	74200723	74201124	3	cg20011983,cg20260610,cg03400443	_,_	N_Shore,Island,Island	_,_	_,_	hyperM.iPSC
2	74211035	74211731	5	cg01017244,cg05890377,cg20891558,cg19729930,cg19325132	_,_	N_Shore,Island,Island,Island,S_Shore	_,_	_,_	hyperM.iPSC
2	74516924	74517206	3	cg22052672,cg11994630,cg27645228	Body;5'UTR;Body,Body;5'UTR;Body,Body;5'UTR;Body	Island,Island,Island	RTKN;RTKN;RTKN,RTKN;RTKN;RTKN,RTKN;RTKN;RTKN	NM_033046;NM_001015056;NM_001015055,NM_033046;NM_001015056;NM_001015055,NM_033046;NM_001015056;NM_001015055	hyperM.iPSC
2	74521794	74523024	8	cg09692695,cg00326131,cg03719070,cg03295928,cg14481208,cg00658082,cg26090072,cg19515035	Body;TSS1500;TSS1500,Body;TSS1500;TSS1500,1stExon;TSS1500;5'UTR;TSS1500,TSS1500,TSS1500,TSS1500,TSS1500,TSS1500	Island,Island,Island,Island,Island,Island,Island,S_Shore	RTKN;RTKN;RTKN,RTKN;RTKN;RTKN,RTKN;RTKN;RTKN;RTKN,RTKN,RTKN,RTKN,RTKN,RTKN	NM_001015055;NM_033046;NM_001015056,NM_001015055;NM_033046;NM_001015056,NM_001015055;NM_033046;NM_001015055;NM_001015056,NM_001015055,NM_001015055,NM_001015055,NM_001015055,NM_001015055	hypoM.iPSC
2	74582608	74583100	6	cg11985480,cg17105139,cg08355260,cg06768010,cg10738368,cg03270710	TSS1500;Body,TSS1500;Body,TSS1500;Body,TSS1500;Body,Body;TSS200,Body;TSS200	N_Shore,N_Shore,Island,Island,Island,Island	LOC151534;LBX2,LOC151534;LBX2,LOC151534;LBX2,LOC151534;LBX2,LBX2;LOC151534,LBX2;LOC151534	NR_024606;NM_001009812,NR_024606;NM_001009812,NR_024606;NM_001009812,NR_024606;NM_001009812,NM_001009812;NR_024606,NM_001009812;NR_024606	hypoM.iPSC
2	74584263	74584921	4	cg05490924,cg02100410,cg25251459,cg13407169	Body;TSS1500,Body;TSS1500,Body;TSS1500,Body;TSS1500	Island,S_Shore,S_Shore,S_Shore	LOC151534;LBX2,LOC151534;LBX2,LOC151534;LBX2,LOC151534;LBX2	NR_024606;NM_001009812,NR_024606;NM_001009812,NR_024606;NM_001009812,NR_024606;NM_001009812	hypoM.iPSC
2	74593746	74594499	3	cg22656420,cg00234616,cg03813688	TSS1500,TSS1500,TSS1500	N_Shore,Island,Island	TLX2,TLX2,TLX2	NM_016170,NM_016170,NM_016170	hypoM.iPSC
2	74595870	74596294	2	cg05856387,cg19656282	Body,Body	Island,Island	TLX2,TLX2	NM_016170,NM_016170	hypoM.iPSC
2	74611333	74611588	2	cg04576203,cg24230340	Body;Body;TSS1500,Body;Body;TSS1500	Island,S_Shore	HTRA2;HTRA2;AUP1,HTRA2;HTRA2;AUP1	NM_145074;NM_013247;NM_181575,NM_145074;NM_013247;NM_181575	hyperM.iPSC
2	74633975	74634125	2	cg11067786,cg08940570	5'UTR;TSS1500,5'UTR;TSS1500	N_Shore,N_Shore	LOXL3;DOK1,LOXL3;DOK1	NM_032603;NM_001381,NM_032603;NM_001381	hypoM.iPSC
2	74729044	74729056	2	cg02768694,cg01287476	TSS1500,TSS1500	Island,Island	C2orf65,C2orf65	NM_138804,NM_138804	hypoM.iPSC
2	74989693	74989842	2	cg13728138,cg12269972	_,_	_,_	_,_	_,_	hyperM.iPSC
2	75791043	75791946	4	cg22496973,cg11051158,cg01044662,cg23725986	Body,TSS200,TSS1500,TSS1500	N_Shore,S_Shore,S_Shore,S_Shore	C2orf3,C2orf3,C2orf3,C2orf3	NM_003203,NM_003203,NM_003203,NM_003203	hyperM.iPSC
2	78861258	78861597	2	cg14362178,cg07197092	_,_	_,_	_,_	_,_	hyperM.iPSC
2	79106302	79106718	2	cg01357846,cg00918005	TSS200;TSS200,5'UTR;5'UTR	_,_	REG3G;REG3G,REG3G;REG3G	NM_001008387;NM_198448,NM_001008387;NM_198448	hyperM.iPSC
2	79165732	79166172	2	cg12393275,cg17863076	3'UTR,Body	_,_	REG1B,REG1B	NM_006507,NM_006507	hyperM.iPSC
2	79219121	79219400	2	cg27226238,cg15359390	TSS200,TSS1500	_,_	REG1P,REG1P	NR_002714,NR_002714	hyperM.iPSC
2	79236421	79237769	3	cg02868123,cg16158220,cg15692837	_,3'UTR;3'UTR;3'UTR	_,_	_,REG3A;REG3A;REG3A	_,NM_138938;NM_138937;NM_002580	hyperM.iPSC
2	79240084	79240781	2	cg02005771,cg27342801	5'UTR;5'UTR;5'UTR;1stExon,TSS1500;TSS1500;TSS1500	_,_	REG3A;REG3A;REG3A;REG3A,REG3A;REG3A;REG3A	NM_002580;NM_138938;NM_138937;NM_138938,NM_138937;NM_002580;NM_138938	hyperM.iPSC
2	79265302	79265425	2	cg21349914,cg03661324	_,_	_,_	_,_	_,_	hyperM.iPSC
2	80404924	80405323	2	cg14754187,cg25237113	Body;Body,Body;Body	S_Shore,S_Shelf	CTNNA2;CTNNA2,CTNNA2;CTNNA2	NM_004389;NM_001164883,NM_004389;NM_001164883	hypoM.iPSC
2	81277324	81277855	2	cg02601249,cg17851928	_,_	S_Shore,S_Shore	_,_	_,_	hyperM.iPSC
2	84596774	84596790	2	cg09321363,cg10929210	TSS1500,TSS1500	N_Shore,N_Shore	DNAH6,DNAH6	NM_001370,NM_001370	hyperM.iPSC
2	84975597	84976058	2	cg06963182,cg05734722	_,_	_,_	_,_	_,_	hyperM.iPSC
2	84987392	84987979	2	cg04797170,cg15034300	_,_	S_Shore,S_Shore	_,_	_,_	hyperM.iPSC
2	85006884	85007439	2	cg14899357,cg09133363	_,_	_,_	_,_	_,_	hyperM.iPSC
2	85215991	85217001	3	cg12913879,cg06430029,cg17137307	Body,Body,Body	Island,S_Shore,S_Shore	TCF7L1,TCF7L1,TCF7L1	NM_031283,NM_031283,NM_031283	hypoM.iPSC
2	85407270	85407646	5	cg23404877,cg21513352,cg20726804,cg01905046,cg19905587	Body,Body,Body,Body,Body	N_Shore,N_Shore,N_Shore,N_Shore,Island	TGOLN2,TGOLN2,TGOLN2,TGOLN2,TGOLN2	NM_006464,NM_006464,NM_006464,NM_006464,NM_006464	hyperM.iPSC
2	85434138	85435869	5	cg16324018,cg16791210,cg00014085,cg08950745,cg13145437	TSS1500;TSS1500;TSS1500;Body;TSS1500,TSS1500;TSS1500;TSS1500;Body;TSS1500,TSS1500;TSS1500;TSS1500;TSS1500;1stExon,5'UTR;5'UTR;5'UTR;TSS1500;5'UTR,5'UTR;5'UTR;5'UTR;TSS1500;5'UTR	N_Shore,N_Shore,N_Shore,S_Shore,S_Shore	ELMOD3;ELMOD3;ELMOD3;RETSAT;ELMOD3,ELMOD3;ELMOD3;ELMOD3;RETSAT;ELMOD3,ELMOD3;ELMOD3;ELMOD3;ELMOD3;RETSAT,ELMOD3;ELMOD3;ELMOD3;RETSAT;ELMOD3,ELMOD3;ELMOD3;ELMOD3;RETSAT;ELMOD3	NM_001135021;NM_001135022;NM_001135023;NM_017750;NM_032213,NM_001135021;NM_001135022;NM_001135023;NM_017750;NM_032213,NM_001135021;NM_001135022;NM_001135023;NM_032213;NM_017750,NM_001135023;NM_032213;NM_001135022;NM_017750;NM_001135021,NM_001135023;NM_032213;NM_001135022;NM_017750;NM_001135021	hyperM.iPSC
2	85491184	85492046	3	cg19627006,cg07215695,cg25161092	5'UTR;1stExon,TSS200,TSS1500	N_Shelf,N_Shelf,N_Shelf	CAPG;CAPG,CAPG,CAPG	NM_001747;NM_001747,NM_001747,NM_001747	hyperM.iPSC
2	85517171	85517516	2	cg04423209,cg13052887	Body,3'UTR	N_Shore,N_Shore	SH2D6,SH2D6	NM_198482,NM_198482	hypoM.iPSC
2	85658152	85658243	3	cg04877910,cg12542933,cg05656364	TSS200,5'UTR;1stExon,5'UTR;1stExon	_,_	VAMP8,VAMP8;VAMP8,VAMP8;VAMP8	NM_003761,NM_003761;NM_003761,NM_003761;NM_003761	hypoM.iPSC
2	85664803	85664932	2	cg02652597,cg16719560	TSS1500,TSS200	N_Shore,Island	VAMP5,VAMP5	NM_006634,NM_006634	hyperM.iPSC
2	85891368	85892100	4	cg08183425,cg08482837,cg09240693,cg04589210	_,_	N_Shore,Island,Island,Island	_,_	_,_	hyperM.iPSC
2	86116735	86116781	2	cg08279008,cg19741167	Body,Body	_,_	POLR1A,POLR1A	NM_015425,NM_015425	hyperM.iPSC
2	86153888	86153915	2	ch.2.1904845F,ch.2.1904847R	Body,Body	_,_	POLR1A,POLR1A	NM_015425,NM_015425	hyperM.iPSC
2	86418888	86419624	2	cg17872866,cg06060731	TSS200;TSS1500;TSS1500;TSS1500,TSS1500;TSS1500;TSS1500;TSS1500	S_Shore,S_Shore	REEP1;REEP1;REEP1;REEP1,REEP1;REEP1;REEP1;REEP1	NM_001164730;NM_001164732;NM_001164731;NM_022912,NM_001164732;NM_001164731;NM_001164730;NM_022912	hyperM.iPSC
2	86643356	86644598	3	cg14670380,cg08725083,cg27274426	5'UTR;Body,TSS1500;TSS1500,TSS1500;TSS1500	N_Shore,S_Shore,S_Shore	VPS24;VPS24,VPS24;VPS24,VPS24;VPS24	NM_001005753;NM_016079,NM_001005753;NM_016079,NM_001005753;NM_016079	hyperM.iPSC
2	86868490	86869947	3	cg11423206,cg24345747,cg07152196	Body;Body;Body;Body,Body;Body;Body;Body,Body;Body;Body;Body	N_Shore,N_Shore,Island	CD8A;CD8A;CD8A;CD8A,CD8A;CD8A;CD8A;CD8A,CD8A;CD8A;CD8A;CD8A	NM_001145873;NM_171827;NM_001768;NR_027353,NM_001145873;NM_171827;NM_001768;NR_027353,NM_001145873;NM_171827;NM_001768;NR_027353	hyperM.iPSC
2	86889493	86890549	5	cg13847640,cg12606911,cg06804210,cg19410791,cg27481559	TSS1500,TSS1500,TSS1500,TSS1500,_	N_Shore,Island,Island,Island,S_Shore	CD8A,CD8A,CD8A,CD8A,_	NM_001145873,NM_001145873,NM_001145873,NM_001145873,_	hyperM.iPSC
2	88208676	88209657	5	cg19910382,cg19217130,cg24046616,cg24933157,cg21243589	1stExon;5'UTR,TSS200,TSS200,TSS200,TSS1500	_,_	FABP1;FABP1,FABP1,FABP1,FABP1,FABP1	NM_001443;NM_001443,NM_001443,NM_001443,NM_001443,NM_001443	hyperM.iPSC
2	88364644	88364960	4	cg09649266,cg13502474,cg25480418,cg24648385	_,_	Island,Island,Island,Island	_,_	_,_	hyperM.iPSC
2	88431022	88431938	3	cg06797617,cg15581269,cg05097197	_,_	N_Shore,Island,S_Shore	_,_	_,_	hypoM.iPSC
2	88604369	88605268	2	cg03975271,cg15903395	TSS1500,TSS200	_,_	C2orf51,C2orf51	NM_152670,NM_152670	hyperM.iPSC
2	88845746	88846624	3	cg26053291,cg21296675,cg12294208	TSS1500,TSS1500,Body	Island,Island,Island	FLJ40330,FLJ40330,FLJ40330	NR_015424,NR_015424,NR_015424	hyperM.iPSC
2	94903691	94903992	2	cg20300592,cg23061114	Body,Body	N_Shore,Island	TEKT4,TEKT4	NM_144705,NM_144705	hyperM.iPSC
2	95027960	95027970	2	cg03445516,cg09409539	_,_	Island,Island	_,_	_,_	hyperM.iPSC
2	95054955	95055374	3	cg09983051,cg04804539,cg07224914	TSS1500;TSS1500;TSS1500;TSS1500,TSS1500;TSS1500;TSS1500;TSS1500,Body;Body;Body;Body	Island,Island,Island	MAL;MAL;MAL;MAL,MAL;MAL;MAL;MAL,MAL;MAL;MAL;MAL	NM_022438;NM_022439;NM_022440;NM_002371,NM_022438;NM_022439;NM_022440;NM_002371,NM_022440;NM_022438;NM_022439;NM_002371	hyperM.iPSC
2	95104089	95104409	2	cg07106169,cg00866476	_,_	N_Shelf,N_Shore	_,_	_,_	hyperM.iPSC
2	95194639	95194670	2	cg14528537,cg12282311	TSS1500;TSS1500,TSS1500;TSS1500	N_Shore,N_Shore	ZNF2;ZNF2,ZNF2;ZNF2	NM_001017396;NM_021088,NM_001017396;NM_021088	hyperM.iPSC
2	95556000	95556426	3	cg10039299,cg00592870,cg10977320	_,_	Island,Island,Island	_,_	_,_	hyperM.iPSC
2	96178387	96178478	2	cg14875081,cg03106207	_,_	S_Shelf,S_Shelf	_,_	_,_	hyperM.iPSC
2	96354489	96355480	3	cg24161793,cg06909469,cg15146125	TSS1500;TSS1500;TSS1500;TSS1500,TSS1500;TSS1500;TSS1500;TSS1500,Body;TSS200;TSS200;5'UTR	N_Shore,N_Shore,S_Shore	ITPRIPL1;ITPRIPL1;ITPRIPL1;ITPRIPL1,ITPRIPL1;ITPRIPL1;ITPRIPL1;ITPRIPL1,ITPRIPL1;ITPRIPL1;ITPRIPL1;ITPRIPL1	NM_001163524;NM_001163523;NM_001008949;NM_178495,NM_001163524;NM_001163523;NM_001008949;NM_178495,NM_001008949;NM_001163524;NM_178495;NM_001163523	hyperM.iPSC
2	96364538	96364651	2	cg01906055,cg03913456	TSS1500,TSS1500	N_Shore,N_Shore	NCAPH,NCAPH	NM_015341,NM_015341	hyperM.iPSC
2	96515649	96515752	2	cg19515245,cg18946473	_,_	_,_	_,_	_,_	hyperM.iPSC
2	96529728	96530149	3	cg06726490,cg22880770,cg18145105	Body,Body,Body	N_Shore,Island,Island	NEURL3,NEURL3,NEURL3	NR_026875,NR_026875,NR_026875	hyperM.iPSC
2	96534864	96535176	4	cg23824762,cg14247287,cg02233149,cg15703357	Body,Body,Body,Body	N_Shelf,N_Shelf,N_Shelf,N_Shelf	NEURL3,NEURL3,NEURL3,NEURL3	NR_026875,NR_026875,NR_026875,NR_026875	hyperM.iPSC
2	96537440	96537579	2	cg07936672,cg21482745	Body,TSS200	N_Shore,Island	NEURL3,NEURL3	NR_026875,NR_026875	hyperM.iPSC
2	96568658	96568874	2	cg13112407,cg04722215	Body,Body	S_Shore,S_Shore	ARID5A,ARID5A	NM_212481,NM_212481	hypoM.iPSC
2	96579575	96579719	2	cg04266887,cg25801052	Body,Body	Island,Island	ARID5A,ARID5A	NM_212481,NM_212481	hypoM.iPSC
2	96584120	96584323	2	cg04709900,cg09304357	_,_	_,_	_,_	_,_	hyperM.iPSC
2	96666395	96667948	5	cg03443331,cg27004414,cg05270066,cg13225420,cg02340801	Body;5'UTR,5'UTR;5'UTR,5'UTR;5'UTR,5'UTR;5'UTR,TSS200;TSS200	N_Shore,N_Shore,N_Shore,N_Shore,Island	KIAA1310;KIAA1310,KIAA1310;KIAA1310,KIAA1310;KIAA1310,KIAA1310;KIAA1310,KIAA1310;KIAA1310	NM_001115016;NM_017991,NM_001115016;NM_017991,NM_001115016;NM_017991,NM_001115016;NM_017991,NM_017991;NM_001115016	hyperM.iPSC
2	96723606	96724620	3	cg00423969,cg14163484,cg12257439	Body;TSS1500,Body;TSS1500,Body;TSS1500	_,_	FER1L5;FER1L5,FER1L5;FER1L5,FER1L5;FER1L5	NM_001113382;NM_001077400,NM_001113382;NM_001077400,NM_001113382;NM_001077400	hyperM.iPSC
2	96862063	96862629	2	cg10674476,cg11281961	Body;Body,3'UTR;3'UTR	_,_	CNNM3;CNNM3,CNNM3;CNNM3	NM_017623;NM_199078,NM_017623;NM_199078	hypoM.iPSC
2	96869002	96869326	2	cg25800500,cg05501761	3'UTR,Body	Island,Island	ANKRD23,ANKRD23	NM_144994,NM_144994	hyperM.iPSC
2	96897362	96897784	2	cg00605777,cg07166409	5'UTR,5'UTR	N_Shore,N_Shore	SEMA4C,SEMA4C	NM_017789,NM_017789	hyperM.iPSC
2	96981864	96982351	2	cg10391522,cg15600915	Body,Body	_,_	FAM178B,FAM178B	NM_001122646,NM_001122646	hyperM.iPSC
2	97014438	97015338	3	cg01190974,cg15721102,cg14187813	5'UTR,5'UTR,5'UTR	N_Shore,N_Shore,N_Shore	FAM178B,FAM178B,FAM178B	NM_001122646,NM_001122646,NM_001122646	hyperM.iPSC
2	97695769	97696452	3	cg25095518,cg09006159,cg12332902	TSS1500,TSS1500,TSS200	_,_	ZAP70,ZAP70,ZAP70	NM_001079,NM_001079,NM_001079	hyperM.iPSC
2	97706857	97707087	3	cg05772104,cg27425784,cg18005337	5'UTR,Body,Body	Island,Island,Island	ZAP70,ZAP70,ZAP70	NM_001079,NM_001079,NM_001079	hyperM.iPSC
2	98010815	98011554	2	cg01727923,cg00872435	_,_	_,_	_,_	_,_	hyperM.iPSC
2	98174437	98174667	2	cg10439283,cg16408856	Body,Body	_,_	VWA3B,VWA3B	NM_144992,NM_144992	hyperM.iPSC
2	98224443	98225027	2	cg26040244,cg20307292	Body,Body	_,_	VWA3B,VWA3B	NM_144992,NM_144992	hyperM.iPSC
2	98294879	98295170	3	cg04846574,cg26347089,cg17822584	Body,Body,Body	_,_	VWA3B,VWA3B,VWA3B	NM_144992,NM_144992,NM_144992	hyperM.iPSC
2	98328033	98328978	2	cg05564412,cg00209520	TSS1500;TSS1500,TSS200;TSS200	N_Shore,N_Shore	CNGA3;CNGA3,CNGA3;CNGA3	NM_001079878;NM_001298,NM_001298;NM_001079878	hyperM.iPSC
2	98352807	98353403	2	cg22241124,cg15954792	5'UTR;5'UTR,Body;Body	_,_	CNGA3;CNGA3,CNGA3;CNGA3	NM_001298;NM_001079878,NM_001298;NM_001079878	hyperM.iPSC
2	98360046	98360162	3	cg08834989,cg23643987,cg20471562	Body;Body,Body;Body,Body;Body	_,_	CNGA3;CNGA3,CNGA3;CNGA3,CNGA3;CNGA3	NM_001298;NM_001079878,NM_001298;NM_001079878,NM_001298;NM_001079878	hyperM.iPSC
2	98801120	98801413	2	cg02787615,cg23100133	Body,Body	N_Shelf,N_Shelf	C2orf55,C2orf55	NM_207362,NM_207362	hyperM.iPSC
2	99138331	99138416	2	cg12909060,cg27306873	5'UTR;5'UTR;5'UTR;5'UTR;5'UTR;TSS1500,5'UTR;5'UTR;5'UTR;5'UTR;5'UTR;TSS1500	S_Shore,S_Shore	LIPT1;LIPT1;LIPT1;LIPT1;LIPT1;TSGA10,LIPT1;LIPT1;LIPT1;LIPT1;LIPT1;TSGA10	NM_145198;NM_145197;NM_145199;NM_015929;NM_145196;NM_025244,NM_145198;NM_145197;NM_145199;NM_015929;NM_145196;NM_025244	hyperM.iPSC
2	99537290	99537349	2	cg22039234,cg15934776	Body;Body,Body;Body	_,_	AFF3;AFF3,AFF3;AFF3	NM_001025108;NM_002285,NM_001025108;NM_002285	hypoM.iPSC
2	100088840	100089849	6	cg09521647,cg11577355,cg04101806,cg11428546,cg12042952,cg03393607	TSS1500;5'UTR,TSS1500;5'UTR,TSS1500;5'UTR,TSS1500;5'UTR,TSS1500;5'UTR,TSS1500;5'UTR	S_Shore,S_Shore,S_Shore,S_Shelf,S_Shelf,S_Shelf	AFF3;AFF3,AFF3;AFF3,AFF3;AFF3,AFF3;AFF3,AFF3;AFF3,AFF3;AFF3	NM_001025108;NM_002285,NM_001025108;NM_002285,NM_001025108;NM_002285,NM_001025108;NM_002285,NM_001025108;NM_002285,NM_001025108;NM_002285	hypoM.iPSC
2	100126055	100126783	2	cg21988972,cg17273588	TSS1500,TSS1500	_,_	AFF3,AFF3	NM_002285,NM_002285	hyperM.iPSC
2	100191094	100191134	2	cg24871482,cg21213952	_,_	_,_	_,_	_,_	hyperM.iPSC
2	100409512	100409642	2	cg15678169,cg22116555	_,_	_,_	_,_	_,_	hyperM.iPSC
2	100453188	100453395	2	cg19583265,cg00246301	TSS200,1stExon	_,_	NMS,NMS	NM_001011717,NM_001011717	hyperM.iPSC
2	100623745	100623942	2	cg00612985,cg22400102	_,_	_,_	_,_	_,_	hyperM.iPSC
2	100804237	100804304	2	cg18428265,cg02365780	5'UTR,5'UTR	S_Shore,S_Shore	NPAS2,NPAS2	NM_002518,NM_002518	hypoM.iPSC
2	101325510	101325568	2	cg16240755,cg13758186	_,_	_,_	_,_	_,_	hyperM.iPSC
2	101457627	101458088	3	cg01388757,cg02933362,cg27255239	TSS200,TSS1500,TSS1500	S_Shore,S_Shore,S_Shore	RFX8,RFX8,RFX8	NM_001145664,NM_001145664,NM_001145664	hyperM.iPSC
2	101638819	101638869	2	cg02563364,cg19730314	_,_	_,_	_,_	_,_	hyperM.iPSC
2	102228560	102228646	2	cg18224468,cg01585348	_,_	_,_	_,_	_,_	hyperM.iPSC
2	102605538	102606274	2	cg26572770,cg15704872	Body,Body	S_Shelf,S_Shelf	SLC9A2,SLC9A2	NM_003048,NM_003048	hyperM.iPSC
2	104639808	104639864	3	cg08915171,cg23239647,cg19824242	_,_	N_Shelf,N_Shelf,N_Shelf	_,_	_,_	hypoM.iPSC
2	104641130	104642352	5	cg10139947,cg12042187,cg06361238,cg13872005,cg08571918	_,_	N_Shore,N_Shore,N_Shore,Island,Island	_,_	_,_	hypoM.iPSC
2	104684748	104685500	2	cg25783869,cg20823348	_,_	_,_	_,_	_,_	hyperM.iPSC
2	104729799	104729968	2	cg14253461,cg18703066	_,_	_,_	_,_	_,_	hyperM.iPSC
2	104738608	104739082	3	cg04667538,cg06770878,cg27391093	_,_	_,_	_,_	_,_	hyperM.iPSC
2	104828302	104828745	3	cg08944893,cg07171538,cg21188710	_,_	S_Shore,S_Shore,S_Shore	_,_	_,_	hypoM.iPSC
2	104840401	104841481	4	cg07644196,cg25517810,cg07152755,cg01453281	_,_	S_Shore,S_Shore,S_Shore,S_Shore	_,_	_,_	hypoM.iPSC
2	104846978	104847119	2	cg10538797,cg02488942	_,_	Island,Island	_,_	_,_	hypoM.iPSC
2	104849929	104851126	4	cg00998372,cg07085361,cg22928386,cg07316846	_,_	N_Shore,Island,S_Shore,S_Shore	_,_	_,_	hypoM.iPSC
2	104855696	104855861	2	cg07315234,cg07036460	_,_	Island,Island	_,_	_,_	hypoM.iPSC
2	105064021	105064117	2	cg27425459,cg26109568	Body,Body	_,_	MRPS9,MRPS9	NM_182640,NM_182640	hypoM.iPSC
2	105219926	105220104	3	cg22022881,cg27422857,cg26874229	_,_	Island,Island,Island	_,_	_,_	hyperM.iPSC
2	105290677	105290815	2	cg03985718,cg21778644	Body;Body,Body;Body	_,_	TGFBRAP1;TGFBRAP1,TGFBRAP1;TGFBRAP1	NM_001142621;NM_004257,NM_001142621;NM_004257	hyperM.iPSC
2	105421438	105421939	5	cg10635061,cg00044097,cg04376709,cg04942516,cg15338159	1stExon;5'UTR,1stExon;5'UTR,TSS1500,TSS1500,TSS1500	_,_	FHL2;FHL2,FHL2;FHL2,FHL2,FHL2,FHL2	NM_201557;NM_201557,NM_201557;NM_201557,NM_201557,NM_201557,NM_201557	hyperM.iPSC
2	106048369	106049072	3	cg14535980,cg21838979,cg10885338	TSS200,TSS200,Body	N_Shore,N_Shore,S_Shore	C2orf40,C2orf40,C2orf40	NM_032411,NM_032411,NM_032411	hypoM.iPSC
2	106143207	106143470	3	cg15341833,cg23362669,cg00118342	Body,Body,Body	_,_	UXS1,UXS1,UXS1	NM_025076,NM_025076,NM_025076	hyperM.iPSC
2	108271244	108271605	2	cg13968390,cg25838818	TSS1500;TSS1500,5'UTR;1stExon;1stExon;5'UTR	_,_	SULT1C2;SULT1C2,SULT1C2;SULT1C2;SULT1C2;SULT1C2	NM_001056;NM_176825,NM_001056;NM_176825;NM_001056;NM_176825	hyperM.iPSC
2	108360743	108360960	4	cg16528895,cg19908768,cg14300730,cg05036173	TSS200,TSS200,TSS200,5'UTR;1stExon	_,_	SULT1C4,SULT1C4,SULT1C4,SULT1C4;SULT1C4	NM_006588,NM_006588,NM_006588,NM_006588;NM_006588	hyperM.iPSC
2	108702059	108702179	2	cg08733774,cg07851008	TSS1500,TSS200	N_Shore,N_Shore	RANBP2,RANBP2	NM_006267,NM_006267	hyperM.iPSC
2	108971950	108972401	2	cg01124420,cg26888063	5'UTR;1stExon,TSS200	_,_	EDAR;EDAR,EDAR	NM_022336;NM_022336,NM_022336	hyperM.iPSC
2	109113167	109113186	3	cg25308803,cg03846641,cg07548255	TSS200;Body,TSS200;Body,TSS200;Body	Island,Island,Island	LOC100287216;SH3RF3,LOC100287216;SH3RF3,LOC100287216;SH3RF3	NR_029193;NM_001099289,NR_029193;NM_001099289,NR_029193;NM_001099289	hyperM.iPSC
2	109154483	109155015	3	cg14191616,cg11355217,cg08198228	Body,Body,Body	_,_	SH3RF3,SH3RF3,SH3RF3	NM_001099289,NM_001099289,NM_001099289	hyperM.iPSC
2	109301160	109301292	3	cg23986590,cg10941445,cg20592766	Body,Body,Body	_,_	SH3RF3,SH3RF3,SH3RF3	NM_001099289,NM_001099289,NM_001099289	hyperM.iPSC
2	109381681	109381780	2	cg06129617,cg06615676	Body,Body	_,_	SH3RF3,SH3RF3	NM_001099289,NM_001099289	hyperM.iPSC
2	109730164	109730450	2	cg17866732,cg21537939	TSS1500;TSS1500;1stExon,TSS1500;TSS1500;1stExon	Island,Island	SEPT10;SEPT10;ANKRD57,SEPT10;SEPT10;ANKRD57	NM_144710;NM_178584;NM_023016,NM_144710;NM_178584;NM_023016	hypoM.iPSC
2	110326930	110327538	4	cg02169857,cg08570243,cg09068086,cg10366439	Body,Body,Body,Body	N_Shore,Island,Island,S_Shore	NCRNA00116,NCRNA00116,NCRNA00116,NCRNA00116	NR_027063,NR_027063,NR_027063,NR_027063	hyperM.iPSC
2	111169016	111169429	2	cg24154631,cg23630869	_,_	_,_	_,_	_,_	hyperM.iPSC
2	111590966	111591502	2	cg19992207,cg05826458	Body,Body	N_Shore,N_Shore	ACOXL,ACOXL	NM_001142807,NM_001142807	hyperM.iPSC
2	111592832	111593223	2	cg02242681,cg00997280	_,_	Island,Island	_,_	_,_	hypoM.iPSC
2	113121132	113121149	2	cg26703507,cg06121808	Body,Body	S_Shore,S_Shore	SLC20A1,SLC20A1	NM_005415,NM_005415	hyperM.iPSC
2	113258562	113258588	2	cg00839584,cg27606396	1stExon;5'UTR,1stExon;5'UTR	_,_	IL1A;IL1A,IL1A;IL1A	NM_000575;NM_000575,NM_000575;NM_000575	hypoM.iPSC
2	113310814	113311082	3	cg20157753,cg07935264,cg18773937	1stExon;5'UTR,TSS200,TSS1500	_,_	IL1B;IL1B,IL1B,IL1B	NM_000576;NM_000576,NM_000576,NM_000576	hyperM.iPSC
2	113451922	113452083	3	cg13298167,cg27067035,cg15657888	TSS200,TSS200,5'UTR;1stExon	_,_	IL1F9,IL1F9,IL1F9;IL1F9	NM_019618,NM_019618,NM_019618;NM_019618	hyperM.iPSC
2	113527112	113527214	2	cg10479672,cg05941585	TSS1500;TSS1500,TSS1500;TSS1500	S_Shore,S_Shore	IL1F8;IL1F8,IL1F8;IL1F8	NM_014438;NM_173178,NM_014438;NM_173178	hyperM.iPSC
2	113541128	113541705	2	cg22991404,cg06383401	TSS1500,TSS1500	_,_	IL1F10,IL1F10	NM_173161,NM_173161	hyperM.iPSC
2	113591697	113591763	3	cg03703171,cg06658391,cg11783497	TSS1500;TSS1500;TSS1500,TSS1500;TSS1500;TSS1500,TSS200;TSS200;TSS200	_,_	IL1RN;IL1RN;IL1RN,IL1RN;IL1RN;IL1RN,IL1RN;IL1RN;IL1RN	NM_173843;NM_173841;NM_000577,NM_173843;NM_173841;NM_000577,NM_000577;NM_173841;NM_173843	hyperM.iPSC
2	113647989	113648036	2	cg26668608,cg13273136	TSS200;Body,1stExon;Body;5'UTR	_,_	PSD4;LOC440839,PSD4;LOC440839;PSD4	NM_012455;NR_029399,NM_012455;NR_029399;NM_012455	hyperM.iPSC
2	113752089	113753155	5	cg09250933,cg06881093,cg05194362,cg25042226,cg05106191	Body;Body;Body;Body;Body;Body,5'UTR;5'UTR;5'UTR;5'UTR;Body;5'UTR,1stExon;5'UTR;5'UTR;1stExon;5'UTR;1stExon;1stExon;Body;5'UTR;1stExon;5'UTR,TSS200;TSS200;TSS200;Body;TSS200;TSS200,TSS200;TSS200;TSS200;Body;TSS200;TSS200	Island,Island,S_Shore,S_Shore,S_Shore	PAX8;PAX8;PAX8;PAX8;PAX8;LOC440839,PAX8;PAX8;PAX8;PAX8;LOC440839;PAX8,PAX8;PAX8;PAX8;PAX8;PAX8;PAX8;PAX8;LOC440839;PAX8;PAX8;PAX8,PAX8;PAX8;PAX8;LOC440839;PAX8;PAX8,PAX8;PAX8;PAX8;LOC440839;PAX8;PAX8	NM_003466;NM_013951;NM_013953;NM_013992;NM_013952;NR_029399,NM_013992;NM_013952;NM_013953;NM_003466;NR_029399;NM_013951,NM_003466;NM_013992;NM_013953;NM_013953;NM_003466;NM_013951;NM_013952;NR_029399;NM_013952;NM_013992;NM_013951,NM_013953;NM_013992;NM_013951;NR_029399;NM_013952;NM_003466,NM_013953;NM_013992;NM_013951;NR_029399;NM_013952;NM_003466	hypoM.iPSC
2	117530769	117531006	2	cg03160217,cg25012143	_,_	_,_	_,_	_,_	hyperM.iPSC
2	118659311	118659363	2	cg03217115,cg27637303	_,_	N_Shore,N_Shore	_,_	_,_	hypoM.iPSC
2	118697389	118699149	8	cg00409049,cg00336150,cg10888941,cg05766802,cg23413104,cg03449108,cg05616969,cg18859174	_,_	N_Shore,N_Shore,N_Shore,Island,Island,S_Shore,S_Shore,S_Shore	_,_	_,_	hypoM.iPSC
2	119308097	119309224	3	cg26267388,cg10543450,cg20599967	_,_	N_Shore,N_Shore,Island	_,_	_,_	hypoM.iPSC
2	119315659	119317418	11	cg10846615,cg26946259,cg20627174,cg21811143,cg21215767,cg16794506,cg15888290,cg02739346,cg16419009,cg26509715,cg21463349	_,3'UTR,3'UTR,3'UTR,3'UTR,Body,Body,Body,Body	Island,Island,Island,Island,Island,Island,Island,Island,Island,Island,Island	_,EN1,EN1,EN1,EN1,EN1,EN1,EN1,EN1	_,NM_001426,NM_001426,NM_001426,NM_001426,NM_001426,NM_001426,NM_001426,NM_001426	hypoM.iPSC
2	119318682	119319603	4	cg22007486,cg08825084,cg20248516,cg00654888	Body,Body,Body,Body	N_Shore,Island,Island,Island	EN1,EN1,EN1,EN1	NM_001426,NM_001426,NM_001426,NM_001426	hypoM.iPSC
2	119322429	119324106	11	cg07419575,cg03266453,cg19613432,cg14274989,cg26990102,cg12305200,cg03726556,cg14228146,cg17030233,cg18093372,cg22548438	TSS1500,TSS1500,TSS1500,TSS1500,TSS1500,TSS1500,_	N_Shore,Island,Island,Island,Island,N_Shore,Island,Island,Island,Island,Island	EN1,EN1,EN1,EN1,EN1,EN1,_	NM_001426,NM_001426,NM_001426,NM_001426,NM_001426,NM_001426,_	hypoM.iPSC
2	119327075	119329257	6	cg17342925,cg24765360,cg05731870,cg26425256,cg12507795,cg19575372	_,_	N_Shore,N_Shore,N_Shore,Island,Island,N_Shore	_,_	_,_	hypoM.iPSC
2	119485044	119485925	2	cg01994190,cg07017331	_,_	N_Shore,S_Shore	_,_	_,_	hyperM.iPSC
2	120152509	120152900	2	cg24441810,cg23456409	TSS1500;TSS1500;TSS1500,TSS1500;TSS1500;TSS1500	N_Shore,N_Shore	TMEM177;TMEM177;TMEM177,TMEM177;TMEM177;TMEM177	NM_001105198;NM_030577;NM_001105199,NM_001105198;NM_030577;NM_001105199	hyperM.iPSC
2	120690512	120690550	2	cg15864074,cg02775804	_,_	_,_	_,_	_,_	hypoM.iPSC
2	120822561	120823488	3	cg00421221,cg08065733,cg09174690	Body,Body,Body	N_Shore,N_Shore,Island	INHBB,INHBB,INHBB	NM_002193,NM_002193,NM_002193	hypoM.iPSC
2	120916261	120917319	7	cg17460441,cg04663790,cg09563922,cg26307218,cg03699623,cg21856256,cg05881221	_,_	Island,Island,N_Shore,N_Shore,Island,Island,S_Shore	_,_	_,_	hypoM.iPSC
2	120940004	120940434	6	cg07412254,cg23006519,cg21406402,cg17204557,cg11455444,cg23689428	Body,Body,Body,Body,TSS200,TSS200	_,_	LOC84931,LOC84931,LOC84931,LOC84931,LOC84931,LOC84931	NR_027181,NR_027181,NR_027181,NR_027181,NR_027181,NR_027181	hypoM.iPSC
2	121050881	121051110	2	cg03661458,cg22272644	_,_	Island,Island	_,_	_,_	hyperM.iPSC
2	121054968	121055077	3	cg07218647,cg09408902,cg03792788	_,_	S_Shelf,S_Shelf,S_Shelf	_,_	_,_	hyperM.iPSC
2	121061021	121061619	3	cg18989909,cg27114644,cg20067049	_,_	Island,Island,Island	_,_	_,_	hypoM.iPSC
2	121088312	121088571	4	cg11269254,cg23960538,cg01294283,cg25306875	_,_	_,_	_,_	_,_	hyperM.iPSC
2	121212868	121216180	7	cg25371590,cg00637745,cg13872898,cg17870997,cg14311362,cg24229662,cg20012888	_,_	S_Shore,N_Shore,N_Shore,N_Shore,N_Shore,S_Shore,S_Shore	_,_	_,_	hypoM.iPSC
2	121271166	121271396	5	cg07488803,cg03555914,cg06969469,cg20547155,cg23681112	TSS200,TSS200,TSS200,5'UTR;1stExon,1stExon	_,_	GLI2,GLI2,GLI2,GLI2;GLI2,GLI2	NM_005270,NM_005270,NM_005270,NM_005270;NM_005270,NM_005270	hyperM.iPSC
2	121322177	121322287	2	cg02640173,cg18835090	Body,Body	_,_	GLI2,GLI2	NM_005270,NM_005270	hyperM.iPSC
2	121341332	121342205	4	cg26228577,cg13713922,cg03287111,cg03465652	Body,Body,Body,Body	Island,S_Shore,S_Shore,S_Shore	GLI2,GLI2,GLI2,GLI2	NM_005270,NM_005270,NM_005270,NM_005270	hyperM.iPSC
2	121386193	121387104	3	cg10559151,cg06378990,cg01484075	Body,Body,Body	_,_	GLI2,GLI2,GLI2	NM_005270,NM_005270,NM_005270	hyperM.iPSC
2	121698336	121698511	2	cg00579706,cg23325313	3'UTR,Body	N_Shore,N_Shore	TFCP2L1,TFCP2L1	NM_014553,NM_014553	hyperM.iPSC
2	121708362	121709267	2	cg09558000,cg18610302	Body,Body	_,_	TFCP2L1,TFCP2L1	NM_014553,NM_014553	hyperM.iPSC
2	121812576	121812653	3	cg09125723,cg03915708,cg23898827	3'UTR;3'UTR;3'UTR,3'UTR;3'UTR;3'UTR,3'UTR;3'UTR;3'UTR	_,_	CLASP1;CLASP1;CLASP1,CLASP1;CLASP1;CLASP1,CLASP1;CLASP1;CLASP1	NM_015282;NM_001142274;NM_001142273,NM_015282;NM_001142274;NM_001142273,NM_015282;NM_001142274;NM_001142273	hypoM.iPSC
2	123135192	123135563	5	cg04175027,cg17080163,cg04178787,cg15750501,cg14657277	_,_	_,_	_,_	_,_	hypoM.iPSC
2	124499713	124500168	2	cg01308258,cg13277493	1stExon,Body	Island,S_Shore	CNTNAP5,CNTNAP5	NM_130773,NM_130773	hyperM.iPSC
2	127131533	127132060	2	cg01342981,cg01835506	Body;Body,Body;Body	S_Shore,S_Shore	GYPC;GYPC,GYPC;GYPC	NM_016815;NM_002101,NM_016815;NM_002101	hyperM.iPSC
2	127245097	127245916	2	cg14917100,cg06282802	_,_	_,_	_,_	_,_	hyperM.iPSC
2	127352084	127352148	2	cg03741475,cg16909742	_,_	_,_	_,_	_,_	hyperM.iPSC
2	127517607	127517741	2	cg05942551,cg00824156	_,_	_,_	_,_	_,_	hypoM.iPSC
2	127650025	127650462	3	cg04546181,cg02106683,cg11380483	_,_	_,_	_,_	_,_	hyperM.iPSC
2	127692208	127692821	2	cg03486991,cg14706852	_,_	N_Shore,N_Shore	_,_	_,_	hypoM.iPSC
2	127882636	127882749	2	cg13700939,cg06202737	_,_	Island,S_Shore	_,_	_,_	hypoM.iPSC
2	127889902	127890220	4	cg08425187,cg23217025,cg24430189,cg02473600	_,_	N_Shore,Island,Island,Island	_,_	_,_	hypoM.iPSC
2	128155417	128155815	3	cg18335290,cg03555157,cg03689092	1stExon;5'UTR,1stExon;5'UTR,1stExon;5'UTR	_,_	LIMS2;LIMS2,LIMS2;LIMS2,LIMS2;LIMS2	NM_001161404;NM_001161404,NM_001161404;NM_001161404,NM_001161404;NM_001161404	hyperM.iPSC
2	128285533	128285817	4	cg09680012,cg20254231,cg08621926,cg00255882	TSS1500;TSS1500;TSS1500,TSS1500;TSS1500;TSS1500,TSS1500;TSS1500;TSS1500,TSS1500;TSS1500;TSS1500	Island,S_Shore,S_Shore,S_Shore	WDR33;WDR33;WDR33,WDR33;WDR33;WDR33,WDR33;WDR33;WDR33,WDR33;WDR33;WDR33	NM_001006623;NM_018383;NM_001006622,NM_001006623;NM_018383;NM_001006622,NM_001006623;NM_018383;NM_001006622,NM_001006623;NM_018383;NM_001006622	hyperM.iPSC
2	128947084	128947948	2	cg07420960,cg01765406	_,_	S_Shore,S_Shelf	_,_	_,_	hyperM.iPSC
2	129211198	129211543	3	cg01432120,cg08839164,cg19198913	_,_	Island,Island,Island	_,_	_,_	hypoM.iPSC
2	129375890	129376416	3	cg12948059,cg05034195,cg11942181	_,_	Island,Island,Island	_,_	_,_	hyperM.iPSC
2	129748231	129749111	2	cg19407943,cg16755863	_,_	_,_	_,_	_,_	hyperM.iPSC
2	130060355	130060713	2	cg07569562,cg01787445	_,_	N_Shore,N_Shore	_,_	_,_	hyperM.iPSC
2	130654688	130654746	2	cg16938369,cg08722115	Body;Body;Body;Body;Body;Body;Body;TSS1500,Body;Body;Body;Body;Body;Body;Body;TSS1500	N_Shore,N_Shore	SMPD4;SMPD4;SMPD4;SMPD4;SMPD4;SMPD4;SMPD4;FAM128B,SMPD4;SMPD4;SMPD4;SMPD4;SMPD4;SMPD4;SMPD4;FAM128B	NM_017951;NR_033232;NR_033231;NM_001171084;NR_033230;NM_017751;NM_001171083;NM_025029,NM_017951;NR_033232;NR_033231;NM_001171084;NR_033230;NM_017751;NM_001171083;NM_025029	hyperM.iPSC
2	130846037	130846938	2	cg20314331,cg12022772	Body;Body,Body;Body	N_Shore,Island	PTPN18;PTPN18,PTPN18;PTPN18	NM_001142370;NM_014369,NM_001142370;NM_014369	hyperM.iPSC
2	130864645	130865233	3	cg04065472,cg09132250,cg23579205	_,_	N_Shore,Island,Island	_,_	_,_	hyperM.iPSC
2	131385153	131385538	2	cg08357787,cg09388540	_,_	_,_	_,_	_,_	hyperM.iPSC
2	131388524	131390846	11	cg01382688,cg27531842,cg11838898,cg14446494,cg09015973,cg12910906,cg07815799,cg00028678,cg11469778,cg13602816,cg24697329	_,TSS1500;TSS1500,TSS1500;TSS1500,TSS1500;TSS1500,TSS1500;TSS1500,TSS200;TSS200,TSS200;TSS200,TSS200;TSS200,TSS200;TSS200,5'UTR;1stExon;1stExon;5'UTR	N_Shore,N_Shore,N_Shore,N_Shore,Island,Island,Island,S_Shore,S_Shore,S_Shore,S_Shore	_,ARHGEF4;ARHGEF4,ARHGEF4;ARHGEF4,ARHGEF4;ARHGEF4,ARHGEF4;ARHGEF4,ARHGEF4;ARHGEF4,ARHGEF4;ARHGEF4,ARHGEF4;ARHGEF4,ARHGEF4;ARHGEF4,ARHGEF4;ARHGEF4;ARHGEF4;ARHGEF4	_,NM_015320;NM_032995,NM_015320;NM_032995,NM_015320;NM_032995,NM_015320;NM_032995,NM_032995;NM_015320,NM_032995;NM_015320,NM_032995;NM_015320,NM_032995;NM_015320,NM_032995;NM_032995;NM_015320;NM_015320	hyperM.iPSC
2	131392464	131392763	2	cg01244775,cg23841608	5'UTR;5'UTR,5'UTR;5'UTR	S_Shore,S_Shelf	ARHGEF4;ARHGEF4,ARHGEF4;ARHGEF4	NM_032995;NM_015320,NM_032995;NM_015320	hyperM.iPSC
2	131404933	131404976	2	cg21559452,cg18754629	5'UTR;5'UTR,5'UTR;5'UTR	_,_	ARHGEF4;ARHGEF4,ARHGEF4;ARHGEF4	NM_032995;NM_015320,NM_032995;NM_015320	hyperM.iPSC
2	131510953	131511952	2	cg10121518,cg11833003	Body;Body,Body;Body	S_Shore,N_Shore	ARHGEF4;ARHGEF4,ARHGEF4;ARHGEF4	NM_032995;NM_015320,NM_032995;NM_015320	hyperM.iPSC
2	131513908	131515339	6	cg08310581,cg26382586,cg04247717,cg20794334,cg25464702,cg23415434	Body;Body,Body;Body,Body;Body,Body;Body,Body;Body,Body;Body	Island,Island,Island,Island,Island,S_Shore	ARHGEF4;ARHGEF4,ARHGEF4;ARHGEF4,ARHGEF4;ARHGEF4,ARHGEF4;ARHGEF4,ARHGEF4;ARHGEF4,ARHGEF4;ARHGEF4	NM_032995;NM_015320,NM_032995;NM_015320,NM_032995;NM_015320,NM_032995;NM_015320,NM_032995;NM_015320,NM_032995;NM_015320	hyperM.iPSC
2	131578772	131578872	3	cg27580743,cg23975062,cg02734883	TSS200;TSS200,TSS200;TSS200,TSS200;TSS200	N_Shore,N_Shore,N_Shore	PLEKHB2;PLEKHB2,PLEKHB2;PLEKHB2,PLEKHB2;PLEKHB2	NM_001100623;NM_017958,NM_001100623;NM_017958,NM_001100623;NM_017958	hyperM.iPSC
2	132120912	132121321	2	cg15478157,cg03152912	_,_	Island,Island	_,_	_,_	hyperM.iPSC
2	132275409	132275684	4	cg25953146,cg22366696,cg18782447,cg03747513	5'UTR,1stExon;5'UTR,1stExon;5'UTR,1stExon;5'UTR	N_Shore,Island,Island,Island	C2orf27B,C2orf27B;C2orf27B,C2orf27B;C2orf27B,C2orf27B;C2orf27B	NM_214461,NM_214461;NM_214461,NM_214461;NM_214461,NM_214461;NM_214461	hyperM.iPSC
2	132509292	132509703	2	cg25446017,cg15275309	_,_	N_Shelf,N_Shore	_,_	_,_	hyperM.iPSC
2	132752664	132753623	3	cg03267139,cg07561890,cg13955423	_,_	_,_	_,_	_,_	hyperM.iPSC
2	133060088	133060127	2	cg17172683,cg18444763	Body,Body	S_Shore,S_Shore	GPR39,GPR39	NM_001508,NM_001508	hyperM.iPSC
2	133144993	133145769	3	cg09622982,cg08613144,cg00937742	TSS200;5'UTR,1stExon;5'UTR;TSS1500,TSS1500;TSS1500	Island,Island,S_Shore	LYPD1;LYPD1,LYPD1;LYPD1;LYPD1,LYPD1;LYPD1	NM_144586;NM_001077427,NM_001077427;NM_001077427;NM_144586,NM_001077427;NM_144586	hypoM.iPSC
2	134042343	134042743	6	cg02715592,cg01586116,cg18123344,cg18984282,cg22247748,cg26428069	1stExon;1stExon;5'UTR;5'UTR,1stExon;1stExon;5'UTR;5'UTR,TSS200;TSS200,TSS200;TSS200,TSS200;TSS200,TSS1500;TSS1500	_,_	NCKAP5;NCKAP5;NCKAP5;NCKAP5,NCKAP5;NCKAP5;NCKAP5;NCKAP5,NCKAP5;NCKAP5,NCKAP5;NCKAP5,NCKAP5;NCKAP5,NCKAP5;NCKAP5	NM_207363;NM_207481;NM_207481;NM_207363,NM_207363;NM_207481;NM_207481;NM_207363,NM_207481;NM_207363,NM_207481;NM_207363,NM_207481;NM_207363,NM_207363;NM_207481	hyperM.iPSC
2	134501862	134502245	4	cg00947413,cg06710741,cg20512501,cg05146544	_,_	N_Shore,N_Shore,Island,Island	_,_	_,_	hyperM.iPSC
2	136004369	136004393	2	cg06222048,cg14591854	TSS1500;5'UTR,TSS1500;5'UTR	N_Shore,N_Shore	R3HDM1;ZRANB3,R3HDM1;ZRANB3	NM_015361;NM_032143,NM_015361;NM_032143	hyperM.iPSC
2	136459930	136460168	3	cg18110444,cg27218212,cg14778622	TSS1500,TSS1500,TSS1500	Island,Island,S_Shore	DARS,DARS,DARS	NM_001349,NM_001349,NM_001349	hyperM.iPSC
2	137464452	137464930	4	cg25714147,cg07412043,cg06848148,cg08231096	TSS1500,TSS200,TSS200,TSS200	_,_	THSD7B,THSD7B,THSD7B,THSD7B	NM_001080427,NM_001080427,NM_001080427,NM_001080427	hyperM.iPSC
2	138438036	138438306	2	cg10136008,cg25241102	TSS1500;TSS1500;TSS1500,1stExon;1stExon;1stExon;5'UTR;5'UTR;5'UTR	_,_	HNMT;HNMT;HNMT,HNMT;HNMT;HNMT;HNMT;HNMT;HNMT	NM_001024075;NM_006895;NM_001024074,NM_001024075;NM_006895;NM_001024074;NM_001024075;NM_001024074;NM_006895	hyperM.iPSC
2	138975210	138975214	2	cg03782584,cg10095539	TSS1500,TSS1500	N_Shore,N_Shore	SPOPL,SPOPL	NM_001001664,NM_001001664	hyperM.iPSC
2	139255471	139255651	2	cg08010094,cg25430507	TSS1500,TSS1500	S_Shore,S_Shore	NXPH2,NXPH2	NM_007226,NM_007226	hypoM.iPSC
2	144863398	144864028	5	cg15345847,cg14827198,cg11299873,cg00025331,cg09398544	3'UTR;3'UTR,Body;Body,Body;Body,Body;Body,Body;Body	N_Shore,Island,Island,Island,S_Shore	ZEB2;ZEB2,ZEB2;ZEB2,ZEB2;ZEB2,ZEB2;ZEB2,ZEB2;ZEB2	NM_001171653;NM_014795,NM_014795;NM_001171653,NM_014795;NM_001171653,NM_014795;NM_001171653,NM_014795;NM_001171653	hypoM.iPSC
2	149351196	149351549	2	cg06010459,ch.2.3077115F	Body,Body	S_Shore,S_Shore	KIF5C,KIF5C	NM_004522,NM_004522	hyperM.iPSC
2	149356292	149356960	3	cg00213281,cg05826944,cg07459181	Body;TSS1500,Body;TSS1500,Body;TSS1500	_,_	KIF5C;MIR1978,KIF5C;MIR1978,KIF5C;MIR1978	NM_004522;NR_031742,NM_004522;NR_031742,NM_004522;NR_031742	hyperM.iPSC
2	149885037	149885523	5	cg00765765,cg25878149,cg07755203,cg14379965,cg24980657	_,_	N_Shore,Island,Island,Island,S_Shore	_,_	_,_	hyperM.iPSC
2	151048996	151049594	2	cg26784822,cg23641707	Body,Body	N_Shore,N_Shore	RND3,RND3	NM_005168,NM_005168	hyperM.iPSC
2	151825609	151827081	4	cg05960677,cg20563208,cg01727434,cg19350357	Body,Body,TSS200,TSS1500	N_Shore,Island,S_Shore,S_Shore	RBM43,RBM43,RBM43,RBM43	NM_198557,NM_198557,NM_198557,NM_198557	hyperM.iPSC
2	151922273	151922423	2	cg01942558,cg09727050	TSS200,5'UTR;1stExon	_,_	TNFAIP6,TNFAIP6;TNFAIP6	NM_007115,NM_007115;NM_007115	hyperM.iPSC
2	152538860	152539460	2	cg06686709,cg13860447	Body;Body;Body;TSS200,Body;Body;TSS1500;Body	_,_	CACNB4;CACNB4;CACNB4;CACNB4,CACNB4;CACNB4;CACNB4;CACNB4	NM_000726;NM_001145798;NM_001005746;NM_001005747,NM_000726;NM_001145798;NM_001005747;NM_001005746	hyperM.iPSC
2	156890953	156894912	14	cg10089963,cg16058600,cg21758126,cg13500877,cg02964555,cg09906382,cg20570611,cg18941818,cg27074041,cg03339537,cg00240195,cg06101180,cg20398418,cg21226516	Body,Body,Body,Body,Body,Body,Body,Body,Body,Body,Body,Body,Body,Body	N_Shore,N_Shore,N_Shore,N_Shore,Island,Island,Island,Island,Island,N_Shore,N_Shore,Island,S_Shore,S_Shore	NR4A2,NR4A2,NR4A2,NR4A2,NR4A2,NR4A2,NR4A2,NR4A2,NR4A2,NR4A2,NR4A2,NR4A2,NR4A2,NR4A2	NM_006186,NM_006186,NM_006186,NM_006186,NM_006186,NM_006186,NM_006186,NM_006186,NM_006186,NM_006186,NM_006186,NM_006186,NM_006186,NM_006186	hypoM.iPSC
2	156999708	157000005	2	cg03230175,cg09290120	TSS1500;TSS1500,TSS1500;TSS1500	N_Shore,N_Shore	GPD2;GPD2,GPD2;GPD2	NM_000408;NM_001083112,NM_000408;NM_001083112	hyperM.iPSC
2	157822315	157822546	3	cg06240690,cg09726654,cg20469837	TSS1500,TSS200,TSS200	_,_	GALNT5,GALNT5,GALNT5	NM_014568,NM_014568,NM_014568	hyperM.iPSC
2	157892438	157892887	4	cg14022550,cg21563471,cg05081953,cg18425731	TSS200,TSS1500,TSS1500,TSS1500	_,_	ERMN,ERMN,ERMN,ERMN	NM_001009959,NM_001009959,NM_001009959,NM_001009959	hyperM.iPSC
2	158402916	158403404	2	cg16682903,cg09499849	5'UTR;5'UTR,5'UTR;5'UTR	_,_	ACVR1;ACVR1,ACVR1;ACVR1	NM_001105;NM_001111067,NM_001105;NM_001111067	hyperM.iPSC
2	159020845	159020973	2	cg24986868,cg14426788	TSS1500;5'UTR;TSS1500;Body,TSS1500;5'UTR;TSS1500;Body	N_Shore,N_Shore	PKP4;CCDC148;PKP4;CCDC148,PKP4;CCDC148;PKP4;CCDC148	NM_003628;NM_001171637;NM_001005476;NM_138803,NM_003628;NM_001171637;NM_001005476;NM_138803	hyperM.iPSC
2	159360059	159360164	2	cg21992932,cg09357934	TSS200,1stExon	_,_	DAPL1,DAPL1	NM_001017920,NM_001017920	hyperM.iPSC
2	160361932	160363327	6	cg08347373,cg04735129,cg20730198,cg15352315,cg03432176,cg09643312	Body,Body,TSS200,TSS1500,TSS1500,TSS1500	N_Shore,N_Shore,S_Shore,S_Shore,S_Shore,S_Shore	CD302,CD302,CD302,CD302,CD302,CD302	NM_014880,NM_014880,NM_014880,NM_014880,NM_014880,NM_014880	hyperM.iPSC
2	160835923	160836369	2	cg04170535,cg12224131	_,_	S_Shore,S_Shore	_,_	_,_	hypoM.iPSC
2	161213080	161213151	2	cg16877087,cg23080818	_,_	_,_	_,_	_,_	hyperM.iPSC
2	161701124	161701561	2	cg19914919,cg25058482	TSS1500;TSS1500,TSS200;TSS200	_,_	TANK;TANK,TANK;TANK	NM_004180;NM_133484,NM_004180;NM_133484	hyperM.iPSC
2	161804278	161804736	3	cg04196143,cg06833102,cg22898145	_,_	Island,S_Shore,S_Shore	_,_	_,_	hypoM.iPSC
2	161808741	161809369	3	cg00599163,cg08807892,cg16506815	_,_	N_Shore,N_Shore,N_Shore	_,_	_,_	hypoM.iPSC
2	161979997	161980782	4	cg07548213,cg06747888,cg20994660,cg21431041	TSS1500,TSS1500,TSS1500,TSS200	N_Shore,N_Shore,N_Shore,N_Shore	TBR1,TBR1,TBR1,TBR1	NM_006593,NM_006593,NM_006593,NM_006593	hypoM.iPSC
2	161987570	161989357	5	cg15837233,cg05301866,cg06942701,cg12520549,cg12757011	Body,Body,Body,3'UTR,3'UTR	N_Shore,Island,Island,S_Shore,S_Shore	TBR1,TBR1,TBR1,TBR1,TBR1	NM_006593,NM_006593,NM_006593,NM_006593,NM_006593	hypoM.iPSC
2	161992452	161993140	3	cg03457195,cg27322846,cg11704490	_,_	Island,Island,S_Shore	_,_	_,_	hypoM.iPSC
2	162639421	162640294	2	cg21565914,cg20539283	TSS200,TSS1500	S_Shore,S_Shore	DPP4,DPP4	NM_001935,NM_001935	hyperM.iPSC
2	162808127	162809739	4	cg04793527,cg08826839,cg20838429,cg03591467	5'UTR;1stExon,TSS200,TSS1500,TSS1500	_,_	FAP;FAP,FAP,FAP,FAP	NM_004460;NM_004460,NM_004460,NM_004460,NM_004460	hyperM.iPSC
2	163912874	163913589	6	cg25702652,cg23948843,cg03662049,cg19402991,cg26343883,cg04319873	_,_	N_Shore,Island,Island,Island,Island,S_Shore	_,_	_,_	hypoM.iPSC
2	165520062	165520392	4	cg24777351,cg03464655,cg05339727,cg05090759	1stExon;5'UTR,1stExon;5'UTR,TSS200,TSS200	_,_	SLC38A11;SLC38A11,SLC38A11;SLC38A11,SLC38A11,SLC38A11	NM_173512;NM_173512,NM_173512;NM_173512,NM_173512,NM_173512	hyperM.iPSC
2	167052020	167052801	2	cg05331214,cg06746492	TSS1500,TSS1500	_,_	SCN7A,SCN7A	NM_002976,NM_002976	hyperM.iPSC
2	167174482	167175325	2	cg08811681,cg17591219	_,_	_,_	_,_	_,_	hyperM.iPSC
2	167811721	167812333	3	cg02084485,cg24519867,cg16582792	Body;Body,Body;Body,Body;Body	_,_	XIRP2;XIRP2,XIRP2;XIRP2,XIRP2;XIRP2	NM_152381;NM_001079810,NM_152381;NM_001079810,NM_152381;NM_001079810	hyperM.iPSC
2	169350975	169351077	2	cg10673467,cg08430074	TSS1500,TSS1500	_,_	NOSTRIN,NOSTRIN	NM_001171631,NM_001171631	hyperM.iPSC
2	169367238	169367428	4	cg16960758,cg16780603,cg00174992,cg09479286	5'UTR;TSS200;TSS200;TSS200,5'UTR;TSS200;TSS200;TSS200,5'UTR;5'UTR;1stExon;5'UTR;5'UTR;1stExon;1stExon,5'UTR;1stExon;1stExon;1stExon;Body	_,_	NOSTRIN;NOSTRIN;NOSTRIN;NOSTRIN,NOSTRIN;NOSTRIN;NOSTRIN;NOSTRIN,NOSTRIN;NOSTRIN;NOSTRIN;NOSTRIN;NOSTRIN;NOSTRIN;NOSTRIN,NOSTRIN;NOSTRIN;NOSTRIN;NOSTRIN;NOSTRIN	NM_001171631;NM_052946;NM_001171632;NM_001039724,NM_001171631;NM_052946;NM_001171632;NM_001039724,NM_001171631;NM_052946;NM_001039724;NM_001039724;NM_001171632;NM_052946;NM_001171632,NM_052946;NM_001039724;NM_052946;NM_001171632;NM_001171631	hyperM.iPSC
2	169465864	169466026	2	cg00689835,cg07338205	TSS200;TSS200,5'UTR;5'UTR;1stExon;1stExon	_,_	G6PC2;G6PC2,G6PC2;G6PC2;G6PC2;G6PC2	NM_021176;NM_001081686,NM_001081686;NM_021176;NM_001081686;NM_021176	hyperM.iPSC
2	169596065	169596178	2	cg18912768,cg00295325	5'UTR;1stExon,TSS200	_,_	ABCB11;ABCB11,ABCB11	NM_003742;NM_003742,NM_003742	hyperM.iPSC
2	170043969	170045083	5	cg04064028,cg17792658,cg10006582,cg10536369,cg11947548	TSS1500,TSS1500,TSS200,TSS200,Body	N_Shore,N_Shore,N_Shore,Island,S_Shore	BBS5,BBS5,BBS5,BBS5,BBS5	NM_152384,NM_152384,NM_152384,NM_152384,NM_152384	hyperM.iPSC
2	170332931	170333725	4	cg15602054,cg17598339,cg01268571,cg04362989	_,_	Island,Island,Island,Island	_,_	_,_	hyperM.iPSC
2	171260139	171260550	2	cg03467825,cg19828869	_,_	_,_	_,_	_,_	hyperM.iPSC
2	171276658	171278249	9	cg15680720,cg17124829,cg04257984,cg02227919,cg05301383,cg22699676,cg07363270,cg08386537,cg02235249	_,Body,Body,Body,Body,Body,Body,Body	Island,Island,N_Shore,N_Shore,N_Shore,N_Shore,N_Shore,N_Shore,Island	_,LOC440925,LOC440925,LOC440925,LOC440925,LOC440925,LOC440925,LOC440925	_,NR_027433,NR_027433,NR_027433,NR_027433,NR_027433,NR_027433,NR_027433	hypoM.iPSC
2	171379726	171380451	3	cg17781710,cg03443455,cg13612847	_,TSS1500;TSS1500,TSS1500;TSS1500	N_Shore,Island,N_Shore	_,GAD1;GAD1,GAD1;GAD1	_,NM_013445;NM_000817,NM_013445;NM_000817	hypoM.iPSC
2	171384552	171385848	4	cg07420274,cg01089249,cg01089319,cg14486905	Body;Body,Body;Body,Body;Body,Body;Body	N_Shore,Island,Island,N_Shore	GAD1;GAD1,GAD1;GAD1,GAD1;GAD1,GAD1;GAD1	NM_000817;NM_013445,NM_000817;NM_013445,NM_000817;NM_013445,NM_000817;NM_013445	hypoM.iPSC
2	171387360	171388961	5	cg04105250,cg00729049,cg21535772,cg19846314,cg07620853	Body;Body,Body;Body,Body;Body,Body;Body,Body;Body	Island,Island,Island,Island,S_Shore	GAD1;GAD1,GAD1;GAD1,GAD1;GAD1,GAD1;GAD1,GAD1;GAD1	NM_000817;NM_013445,NM_000817;NM_013445,NM_000817;NM_013445,NM_000817;NM_013445,NM_000817;NM_013445	hypoM.iPSC
2	172086227	172086282	2	cg12072024,cg24200501	TSS1500;TSS1500,TSS1500;TSS1500	N_Shore,N_Shore	CYBRD1;CYBRD1,CYBRD1;CYBRD1	NM_001127383;NM_024843,NM_001127383;NM_024843	hyperM.iPSC
2	172252054	172252080	2	cg10810078,cg21756465	TSS200,TSS200	N_Shore,N_Shore	DYNC1I2,DYNC1I2	NM_001378,NM_001378	hyperM.iPSC
2	172652639	172654439	9	cg03654166,cg16792302,cg12608433,cg08402365,cg14996143,cg24724664,cg16472050,cg08520746,cg08750504	Body,Body,3'UTR,3'UTR,3'UTR,3'UTR,_	N_Shore,Island,Island,Island,Island,Island,N_Shore,Island,Island	MAP1D,MAP1D,MAP1D,MAP1D,MAP1D,MAP1D,_	NM_199227,NM_199227,NM_199227,NM_199227,NM_199227,NM_199227,_	hypoM.iPSC
2	172660074	172662171	8	cg00822840,cg13343818,cg17737681,cg12308746,cg05938001,cg12762816,cg01244270,cg12676702	Body;Body,Body;Body,Body;Body,Body;Body,Body;3'UTR,3'UTR;3'UTR,3'UTR;3'UTR,3'UTR;3'UTR	Island,Island,Island,N_Shore,Island,S_Shore,S_Shore,S_Shore	DLX1;DLX1,DLX1;DLX1,DLX1;DLX1,DLX1;DLX1,DLX1;DLX1,DLX1;DLX1,DLX1;DLX1,DLX1;DLX1	NM_178120;NM_001038493,NM_178120;NM_001038493,NM_178120;NM_001038493,NM_178120;NM_001038493,NM_178120;NM_001038493,NM_001038493;NM_178120,NM_001038493;NM_178120,NM_001038493;NM_178120	hypoM.iPSC
2	172664005	172664783	2	cg13702421,cg12663535	_,_	N_Shelf,N_Shelf	_,_	_,_	hypoM.iPSC
2	172666570	172666604	2	cg04522045,cg13433278	_,_	N_Shore,N_Shore	_,_	_,_	hypoM.iPSC
2	172668765	172669239	2	cg11992621,cg22309696	_,_	Island,Island	_,_	_,_	hypoM.iPSC
2	173038542	173038641	3	cg06262280,cg14512870,cg02670123	Body;Body,Body;Body,Body;Body	_,_	ITGA6;ITGA6,ITGA6;ITGA6,ITGA6;ITGA6	NM_001079818;NM_000210,NM_001079818;NM_000210,NM_001079818;NM_000210	hyperM.iPSC
2	173216286	173216402	2	cg04505972,cg03879160	_,_	_,_	_,_	_,_	hyperM.iPSC
2	173316094	173316242	2	cg16934969,cg27431545	Body,Body	_,_	RAPGEF4,RAPGEF4	NM_007023,NM_007023	hyperM.iPSC
2	173989279	173989316	2	cg27452943,cg08536999	_,_	_,_	_,_	_,_	hyperM.iPSC
2	174584906	174585603	2	ch.2.3542011F,cg14510926	_,_	N_Shore,N_Shore	_,_	_,_	hyperM.iPSC
2	174597921	174599095	8	cg25004193,cg07729527,cg13223682,cg01883046,cg05483776,cg08107354,cg10256255,cg03148124	_,_	N_Shore,N_Shore,N_Shore,Island,Island,Island,Island,S_Shore	_,_	_,_	hyperM.iPSC
2	174902000	174902325	2	cg19049194,cg00306909	_,_	Island,S_Shore	_,_	_,_	hypoM.iPSC
2	174905939	174908049	10	cg01147810,cg10507482,cg25849196,cg03805618,cg06212224,cg00928397,cg16233311,cg17153568,cg18609783,cg03249890	_,TSS1500,TSS1500,TSS1500,TSS1500,TSS1500,TSS1500,TSS200	N_Shore,N_Shore,N_Shore,N_Shore,N_Shore,N_Shore,N_Shore,N_Shore,N_Shore,Island	_,SP9,SP9,SP9,SP9,SP9,SP9,SP9	_,NM_001145250,NM_001145250,NM_001145250,NM_001145250,NM_001145250,NM_001145250,NM_001145250	hypoM.iPSC
2	174910643	174912495	4	cg00054771,cg02728209,cg01898964,cg11664139	_,_	Island,Island,N_Shore,N_Shore	_,_	_,_	hypoM.iPSC
2	174917321	174917501	2	cg16450590,cg25047379	_,_	Island,S_Shore	_,_	_,_	hypoM.iPSC
2	174968153	174969088	3	cg20345325,cg20362287,cg26139062	Body;TSS1500,Body;TSS1500,TSS1500;5'UTR	_,_	CIR1;SCRN3,CIR1;SCRN3,CIR1;SCRN3	NM_004882;NM_024583,NM_004882;NM_024583,NM_004882;NM_024583	hyperM.iPSC
2	175058867	175059281	2	cg25586410,cg24722346	5'UTR;5'UTR,5'UTR;5'UTR	N_Shore,N_Shore	GPR155;GPR155,GPR155;GPR155	NM_152529;NM_001033045,NM_152529;NM_001033045	hyperM.iPSC
2	175170698	175170768	2	cg17165848,cg22047295	5'UTR;5'UTR,5'UTR;5'UTR	_,_	WIPF1;WIPF1,WIPF1;WIPF1	NM_003387;NM_001077269,NM_003387;NM_001077269	hyperM.iPSC
2	175207359	175207623	4	cg13821008,cg03983223,cg14035238,cg27117828	5'UTR;5'UTR,1stExon;5'UTR;5'UTR,5'UTR;TSS200,5'UTR;TSS200	_,_	WIPF1;WIPF1,WIPF1;WIPF1;WIPF1,WIPF1;WIPF1,WIPF1;WIPF1	NM_003387;NM_001077269,NM_003387;NM_003387;NM_001077269,NM_001077269;NM_003387,NM_001077269;NM_003387	hyperM.iPSC
2	175368837	175369807	2	cg19705386,cg01454638	_,_	_,_	_,_	_,_	hyperM.iPSC
2	175754807	175754878	2	cg14327989,cg05223591	TSS200;TSS200,TSS1500;TSS200	S_Shore,S_Shore	ATP5G3;ATP5G3,ATP5G3;ATP5G3	NM_001002258;NM_001689,NM_001002258;NM_001689	hyperM.iPSC
2	176645054	176646217	4	cg17835961,cg24798398,cg25180342,cg07694390	_,_	Island,S_Shore,S_Shore,S_Shore	_,_	_,_	hyperM.iPSC
2	176660565	176661176	3	cg00716470,cg18241829,cg14941291	_,_	N_Shore,Island,Island	_,_	_,_	hypoM.iPSC
2	176664642	176665087	4	cg21128569,cg07802350,cg19325985,cg05256269	TSS1500,TSS1500,TSS1500,TSS1500	N_Shore,Island,N_Shore,N_Shore	HOXD13,HOXD13,HOXD13,HOXD13	NM_000523,NM_000523,NM_000523,NM_000523	hypoM.iPSC
2	176666798	176667475	2	cg18229422,cg24914355	Body,Body	S_Shore,S_Shore	HOXD13,HOXD13	NM_000523,NM_000523	hypoM.iPSC
2	176669798	176669849	2	cg24563197,cg13011362	_,_	N_Shore,N_Shore	_,_	_,_	hypoM.iPSC
2	176671599	176673975	13	cg17512364,cg06473181,cg20292112,cg06571387,cg01405040,cg03874199,cg12268637,cg11754318,cg02694427,cg23130254,cg03964958,cg03371669,cg15767955	TSS1500,TSS1500,TSS1500,TSS1500,TSS1500,TSS200,TSS200,TSS200,TSS200,1stExon,1stExon,Body,_	N_Shore,N_Shore,N_Shore,Island,Island,Island,Island,Island,Island,Island,Island,Island,S_Shore	HOXD12,HOXD12,HOXD12,HOXD12,HOXD12,HOXD12,HOXD12,HOXD12,HOXD12,HOXD12,HOXD12,HOXD12,_	NM_021193,NM_021193,NM_021193,NM_021193,NM_021193,NM_021193,NM_021193,NM_021193,NM_021193,NM_021193,NM_021193,NM_021193,_	hypoM.iPSC
2	176681934	176682306	5	cg00861009,cg07566169,cg20605061,cg22455694,cg01708273	Body,Body,Body,3'UTR,3'UTR	Island,Island,S_Shore,S_Shore,S_Shore	HOXD11,HOXD11,HOXD11,HOXD11,HOXD11	NM_021192,NM_021192,NM_021192,NM_021192,NM_021192	hypoM.iPSC
2	176684420	176685620	4	cg25626427,cg19738283,cg00786305,cg12504882	_,_	N_Shore,N_Shore,N_Shore,Island	_,_	_,_	hypoM.iPSC
2	176689083	176689582	4	cg20649017,cg10364040,cg18115040,cg05979020	TSS1500,TSS1500,TSS200,TSS200	Island,Island,Island,Island	HOXD10,HOXD10,HOXD10,HOXD10	NM_002148,NM_002148,NM_002148,NM_002148	hypoM.iPSC
2	176694507	176694781	2	cg06341701,cg04730882	TSS1500,TSS1500	N_Shore,Island	HOXD9,HOXD9	NM_014213,NM_014213	hypoM.iPSC
2	176696726	176697731	6	cg15991405,cg13158481,cg25829490,cg11597131,cg09173768,cg10753836	Body,Body,Body,3'UTR,3'UTR,3'UTR	N_Shore,N_Shore,N_Shore,N_Shore,Island,Island	HOXD9,HOXD9,HOXD9,HOXD9,HOXD9,HOXD9	NM_014213,NM_014213,NM_014213,NM_014213,NM_014213,NM_014213	hypoM.iPSC
2	176713244	176713552	2	cg24058732,cg15054838	_,_	N_Shore,N_Shore	_,_	_,_	hyperM.iPSC
2	176720618	176724283	14	cg15990972,cg02857760,cg17818471,cg23986620,cg01043845,cg24000528,cg23460578,cg12127282,cg08717880,cg27160395,cg12215739,cg25942990,cg01152019,cg04843067	_,TSS1500,TSS1500,TSS1500;TSS1500,TSS1500;TSS200,TSS1500;TSS200,TSS1500;TSS200,TSS1500;TSS200,TSS1500;Body,TSS200	Island,Island,Island,S_Shore,N_Shore,N_Shore,N_Shore,N_Shore,N_Shore,Island,Island,Island,Island,N_Shore	_,MIR10B,MIR10B,HOXD4;MIR10B,HOXD4;MIR10B,HOXD4;MIR10B,HOXD4;MIR10B,HOXD4;MIR10B,HOXD4;MIR10B,HOXD4	_,NR_029609,NR_029609,NM_014621;NR_029609,NM_014621;NR_029609,NM_014621;NR_029609,NM_014621;NR_029609,NM_014621;NR_029609,NM_014621;NR_029609,NM_014621	hypoM.iPSC
2	176725598	176726043	3	cg16218721,cg01414185,cg09701582	Body,Body,3'UTR	Island,Island,S_Shore	HOXD4,HOXD4,HOXD4	NM_014621,NM_014621,NM_014621	hypoM.iPSC
2	176732363	176734547	10	cg00223681,cg05342515,cg13180315,cg05266564,cg04935434,cg07077013,cg09601175,cg07930539,cg19047265,cg01871127	_,_	N_Shore,N_Shore,N_Shore,Island,Island,Island,Island,N_Shore,N_Shore,N_Shore	_,_	_,_	hypoM.iPSC
2	176735956	176738417	11	cg24704177,cg13316854,cg25938806,cg12634591,cg10304824,cg24541426,cg05021643,cg15812753,cg21092808,cg00893471,cg23547017	TSS1500,TSS1500,TSS1500,TSS200,1stExon;5'UTR,5'UTR,5'UTR,5'UTR,5'UTR,5'UTR,5'UTR	Island,Island,N_Shore,N_Shore,N_Shore,Island,Island,Island,Island,Island,S_Shore	HOXD3,HOXD3,HOXD3,HOXD3,HOXD3;HOXD3,HOXD3,HOXD3,HOXD3,HOXD3,HOXD3,HOXD3	NM_006898,NM_006898,NM_006898,NM_006898,NM_006898;NM_006898,NM_006898,NM_006898,NM_006898,NM_006898,NM_006898,NM_006898	hypoM.iPSC
2	176744682	176745610	3	cg01171212,cg00278547,cg10159630	Body,3'UTR,3'UTR	Island,Island,S_Shore	HOXD3,HOXD3,HOXD3	NM_006898,NM_006898,NM_006898	hypoM.iPSC
2	176747541	176748472	6	cg10477905,cg13768137,cg12602409,cg19335437,cg23322546,cg10086659	_,_	N_Shore,N_Shore,Island,Island,S_Shore,S_Shore	_,_	_,_	hypoM.iPSC
2	178685227	178685248	2	cg09757400,cg16928994	TSS200,TSS200	N_Shore,N_Shore	RBM45,RBM45	NM_152945,NM_152945	hyperM.iPSC
2	179024727	179024737	2	cg21446511,cg25074023	TSS1500;TSS1500;TSS1500;Body;5'UTR;1stExon,TSS1500;TSS1500;TSS1500;Body;5'UTR;1stExon	Island,Island	PRKRA;PRKRA;PRKRA;MIR548N;DFNB59;DFNB59,PRKRA;PRKRA;PRKRA;MIR548N;DFNB59;DFNB59	NM_001139518;NM_003690;NM_001139517;NR_031666;NM_001042702;NM_001042702,NM_001139518;NM_003690;NM_001139517;NR_031666;NM_001042702;NM_001042702	hyperM.iPSC
2	179380366	179380371	2	cg05185019,cg10859358	1stExon;5'UTR;5'UTR;5'UTR;1stExon;1stExon;5'UTR;5'UTR;1stExon;1stExon,1stExon;5'UTR;5'UTR;5'UTR;1stExon;1stExon;5'UTR;5'UTR;1stExon;1stExon	_,_	TTN;TTN;TTN;TTN;TTN;TTN;TTN;TTN;TTN;TTN,TTN;TTN;TTN;TTN;TTN;TTN;TTN;TTN;TTN;TTN	NM_133432;NM_133432;NM_003319;NM_133437;NM_003319;NM_133437;NM_133379;NM_133378;NM_133378;NM_133379,NM_133432;NM_133432;NM_003319;NM_133437;NM_003319;NM_133437;NM_133379;NM_133378;NM_133378;NM_133379	hyperM.iPSC
2	179623109	179623113	2	cg24335070,cg24547885	_,_	_,_	_,_	_,_	hyperM.iPSC
2	182558304	182558514	3	cg19742470,cg24545949,cg15735129	TSS1500,TSS1500,TSS1500	_,_	PPP1R1C,PPP1R1C,PPP1R1C	NM_001080545,NM_001080545,NM_001080545	hyperM.iPSC
2	183095637	183095761	3	cg09672358,cg09845785,cg05148373	1stExon;TSS200;5'UTR,TSS200;TSS1500,TSS200;TSS1500	_,_	PDE1A;PDE1A;PDE1A,PDE1A;PDE1A,PDE1A;PDE1A	NM_001003683;NM_005019;NM_001003683,NM_001003683;NM_005019,NM_001003683;NM_005019	hyperM.iPSC
2	183611988	183612015	4	cg00357532,cg25199878,cg11711114,cg05773628	TSS1500;TSS1500,TSS1500;TSS1500,TSS1500;TSS1500,TSS1500;TSS1500	S_Shore,S_Shore,S_Shore,S_Shore	NCKAP1;NCKAP1,NCKAP1;NCKAP1,NCKAP1;NCKAP1,NCKAP1;NCKAP1	NM_013436;NM_205842,NM_013436;NM_205842,NM_013436;NM_205842,NM_013436;NM_205842	hyperM.iPSC
2	183652183	183652293	2	cg02561726,cg12662931	Body;Body,Body;Body	_,_	DUSP19;DUSP19,DUSP19;DUSP19	NM_001142314;NM_080876,NM_001142314;NM_080876	hyperM.iPSC
2	185170514	185170900	2	cg01715143,cg15577595	TSS1500,TSS1500	N_Shore,N_Shore	ZNF804A,ZNF804A	NM_194250,NM_194250	hyperM.iPSC
2	186317811	186318524	2	cg12006072,cg15143516	_,_	_,_	_,_	_,_	hyperM.iPSC
2	187266600	187266647	2	cg22900206,cg00184203	TSS1500,TSS1500	N_Shore,N_Shore	FAM171B,FAM171B	NM_177454,NM_177454	hypoM.iPSC
2	187422413	187422524	3	cg18950539,cg13135031,cg14393114	TSS1500,TSS1500,TSS1500	S_Shore,S_Shore,S_Shore	ZSWIM2,ZSWIM2,ZSWIM2	NM_182521,NM_182521,NM_182521	hyperM.iPSC
2	188127332	188127813	2	cg23477967,cg27342837	1stExon;5'UTR;1stExon;5'UTR,TSS1500;TSS1500	_,_	TFPI;TFPI;TFPI;TFPI,TFPI;TFPI	NM_006287;NM_006287;NM_001032281;NM_001032281,NM_001032281;NM_006287	hyperM.iPSC
2	189752846	189753228	3	cg07875385,cg10765212,cg02420724	1stExon;5'UTR,TSS200,TSS1500	_,_	COL5A2;COL5A2,COL5A2,COL5A2	NM_000393;NM_000393,NM_000393,NM_000393	hyperM.iPSC
2	190336718	190337190	2	cg12255818,cg22332666	TSS1500,TSS1500	_,_	OSGEPL1,OSGEPL1	NM_022353,NM_022353	hyperM.iPSC
2	190915854	190916477	4	cg05963740,cg15635368,cg03345805,cg25753817	TSS1500;TSS1500,TSS200;TSS200,TSS200;TSS200,1stExon;5'UTR;1stExon;5'UTR	N_Shore,N_Shore,N_Shore,N_Shore	INPP1;INPP1,INPP1;INPP1,INPP1;INPP1,INPP1;INPP1;INPP1;INPP1	NM_002194;NM_001128928,NM_002194;NM_001128928,NM_002194;NM_001128928,NM_002194;NM_001128928;NM_001128928;NM_002194	hyperM.iPSC
2	191107291	191108125	2	cg19641999,cg26605467	Body,TSS1500	N_Shore,S_Shore	TMEM194B,TMEM194B	NM_001142645,NM_001142645	hyperM.iPSC
2	191817976	191818000	2	cg15096140,cg25475516	TSS1500;TSS1500;TSS1500,TSS1500;TSS1500;TSS1500	N_Shore,N_Shore	MYO1B;MYO1B;MYO1B,MYO1B;MYO1B;MYO1B	NM_001130158;NM_012223;NM_001161819,NM_001130158;NM_012223;NM_001161819	hyperM.iPSC
2	192252055	192252153	2	cg15454486,cg22795891	Body;Body,Body;Body	S_Shore,S_Shore	OBFC2A;OBFC2A,OBFC2A;OBFC2A	NR_024415;NM_001031716,NR_024415;NM_001031716	hyperM.iPSC
2	192420150	192420775	4	cg08390172,cg06352750,cg14446712,cg18843739	5'UTR;1stExon,5'UTR;1stExon,TSS200,TSS1500	_,_	SDPR;SDPR,SDPR;SDPR,SDPR,SDPR	NM_004657;NM_004657,NM_004657;NM_004657,NM_004657,NM_004657	hyperM.iPSC
2	196107071	196107648	2	cg10800620,cg25339052	_,_	_,_	_,_	_,_	hyperM.iPSC
2	197383120	197383545	2	cg20944278,cg06284438	1stExon;5'UTR,TSS1500	_,_	C2orf66;C2orf66,C2orf66	NM_213608;NM_213608,NM_213608	hyperM.iPSC
2	197737386	197738130	3	cg26132737,cg09496748,cg03711802	Body,Body,Body	Island,Island,S_Shore	ANKRD44,ANKRD44,ANKRD44	NM_153697,NM_153697,NM_153697	hypoM.iPSC
2	197772004	197772026	2	cg04278110,cg13941760	TSS1500,TSS1500	_,_	ANKRD44,ANKRD44	NM_153697,NM_153697	hyperM.iPSC
2	198088382	198088629	7	cg24533149,cg10972865,cg19965941,cg22969808,cg26641578,cg03023437,cg04056179	TSS200;TSS1500;TSS1500,TSS200;TSS1500;TSS1500,TSS200;TSS1500;TSS1500,TSS200;TSS1500;TSS1500,TSS200;TSS1500;TSS1500,TSS200;TSS1500;TSS1500,5'UTR;1stExon;TSS1500;TSS1500	N_Shore,N_Shore,N_Shore,N_Shore,N_Shore,N_Shore,N_Shore	MOBKL3;MOBKL3;MOBKL3,MOBKL3;MOBKL3;MOBKL3,MOBKL3;MOBKL3;MOBKL3,MOBKL3;MOBKL3;MOBKL3,MOBKL3;MOBKL3;MOBKL3,MOBKL3;MOBKL3;MOBKL3,MOBKL3;MOBKL3;MOBKL3;MOBKL3	NM_199482;NM_001100819;NM_015387,NM_199482;NM_001100819;NM_015387,NM_199482;NM_001100819;NM_015387,NM_199482;NM_001100819;NM_015387,NM_199482;NM_001100819;NM_015387,NM_199482;NM_001100819;NM_015387,NM_199482;NM_199482;NM_001100819;NM_015387	hyperM.iPSC
2	198358025	198358028	2	cg11031976,cg00982548	5'UTR;Body;1stExon,5'UTR;Body;1stExon	Island,Island	BOLL;BOLL;BOLL,BOLL;BOLL;BOLL	NM_033030;NM_197970;NM_033030,NM_033030;NM_197970;NM_033030	hypoM.iPSC
2	200034836	200035581	5	cg03163783,cg20785796,cg23994043,cg07835424,cg01558212	TSS1500,TSS1500,TSS1500,_	Island,Island,Island,Island,Island	SATB2,SATB2,SATB2,_	NM_015265,NM_015265,NM_015265,_	hypoM.iPSC
2	200037731	200039096	8	cg17360781,cg05165940,cg10982364,cg04021372,cg22539420,cg00586817,cg09250678,cg09240763	_,_	Island,Island,Island,Island,Island,S_Shore,S_Shore,S_Shore	_,_	_,_	hypoM.iPSC
2	200040162	200040625	4	cg08351100,cg24688655,cg27109600,cg07444473	TSS1500,TSS1500,TSS1500,TSS1500	N_Shore,N_Shore,N_Shore,N_Shore	FLJ32063,FLJ32063,FLJ32063,FLJ32063	NR_026830,NR_026830,NR_026830,NR_026830	hypoM.iPSC
2	200041646	200043928	11	cg03965648,cg08690859,cg27456468,cg16798252,cg24345062,cg15981734,cg09605636,cg07913197,cg25052456,cg10168149,cg22814961	Body,Body,Body,Body,Body,Body,Body,Body,Body,Body,Body	N_Shore,Island,Island,N_Shore,N_Shore,N_Shore,N_Shore,N_Shore,N_Shore,Island,Island	FLJ32063,FLJ32063,FLJ32063,FLJ32063,FLJ32063,FLJ32063,FLJ32063,FLJ32063,FLJ32063,FLJ32063,FLJ32063	NR_026830,NR_026830,NR_026830,NR_026830,NR_026830,NR_026830,NR_026830,NR_026830,NR_026830,NR_026830,NR_026830	hypoM.iPSC
2	201083282	201083343	3	cg11504408,cg22444610,cg11388238	TSS1500,TSS1500,TSS1500	S_Shore,S_Shore,S_Shore	KCTD18,KCTD18,KCTD18	NM_152387,NM_152387,NM_152387	hyperM.iPSC
2	201098550	201098769	2	cg24930416,cg05409597	TSS1500;TSS1500;TSS1500,TSS1500;TSS1500;TSS1500	N_Shore,N_Shore	SGOL2;SGOL2;SGOL2,SGOL2;SGOL2;SGOL2	NM_001160046;NM_001160033;NM_152524,NM_001160046;NM_001160033;NM_152524	hyperM.iPSC
2	201434384	201434911	2	cg00982136,cg21990144	Body;Body;Body;Body,5'UTR;Body;Body;Body	N_Shelf,N_Shelf	CLK1;CLK1;CLK1;CLK1,CLK1;CLK1;CLK1;CLK1	NR_027855;NM_001162407;NM_004071;NR_027856,NM_004071;NR_027855;NM_001162407;NR_027856	hyperM.iPSC
2	201688883	201690684	13	cg03974286,cg01779076,cg10947827,cg25051278,cg13311930,cg16952751,cg17802847,cg21012647,cg07476617,cg09643151,cg02829456,cg12944530,cg23457862	TSS1500;TSS200,TSS1500;TSS200,TSS1500;TSS200,5'UTR;TSS200;1stExon,5'UTR;TSS200;1stExon,5'UTR;TSS200;1stExon,5'UTR;1stExon;5'UTR;1stExon,5'UTR;5'UTR,5'UTR;5'UTR,5'UTR;5'UTR,5'UTR;TSS1500;5'UTR,5'UTR;TSS1500;5'UTR,5'UTR;TSS1500;5'UTR	N_Shore,N_Shore,N_Shore,N_Shore,N_Shore,N_Shore,N_Shore,N_Shore,N_Shore,N_Shore,N_Shore,N_Shore,N_Shore	CFLAR;CFLAR,CFLAR;CFLAR,CFLAR;CFLAR,CFLAR;CFLAR;CFLAR,CFLAR;CFLAR;CFLAR,CFLAR;CFLAR;CFLAR,CFLAR;CFLAR;CFLAR;CFLAR,CFLAR;CFLAR,CFLAR;CFLAR,CFLAR;CFLAR,CFLAR;CFLAR;CFLAR,CFLAR;CFLAR;CFLAR,CFLAR;CFLAR;CFLAR	NM_003879;NM_001127184,NM_003879;NM_001127184,NM_003879;NM_001127184,NM_001127184;NM_003879;NM_001127184,NM_001127184;NM_003879;NM_001127184,NM_001127184;NM_003879;NM_001127184,NM_001127184;NM_003879;NM_003879;NM_001127184,NM_001127184;NM_003879,NM_001127184;NM_003879,NM_001127184;NM_003879,NM_001127184;NM_001127183;NM_003879,NM_001127184;NM_001127183;NM_003879,NM_001127184;NM_001127183;NM_003879	hyperM.iPSC
2	201805307	201806261	3	cg04048517,cg02878216,cg25095814	TSS1500;TSS1500;TSS1500;TSS1500,TSS1500;TSS1500;TSS1500;TSS1500,TSS200;TSS200;TSS200;TSS200	_,_	CASP8;CASP8;CASP8;CASP8,CASP8;CASP8;CASP8;CASP8,CASP8;CASP8;CASP8;CASP8	NM_001080124;NM_001228;NM_033355;NM_033358,NM_001080124;NM_001228;NM_033355;NM_033358,NM_033355;NM_001228;NM_001080124;NM_033358	hyperM.iPSC
2	201830554	201831077	7	cg09464206,cg27410837,cg20418725,cg25748441,cg23882545,cg12604794,cg00978584	5'UTR;5'UTR;5'UTR;TSS1500;5'UTR,5'UTR;5'UTR;5'UTR;TSS1500;5'UTR,5'UTR;5'UTR;5'UTR;TSS1500;5'UTR,5'UTR;5'UTR;5'UTR;5'UTR;TSS200,5'UTR;5'UTR;5'UTR;5'UTR;TSS200,5'UTR;5'UTR;5'UTR;1stExon;5'UTR;5'UTR,5'UTR;5'UTR;5'UTR;1stExon;5'UTR;5'UTR	_,_	CASP8;CASP8;CASP8;CASP8;CASP8,CASP8;CASP8;CASP8;CASP8;CASP8,CASP8;CASP8;CASP8;CASP8;CASP8,CASP8;CASP8;CASP8;CASP8;CASP8,CASP8;CASP8;CASP8;CASP8;CASP8,CASP8;CASP8;CASP8;CASP8;CASP8;CASP8,CASP8;CASP8;CASP8;CASP8;CASP8;CASP8	NM_001080124;NM_033355;NM_033358;NM_001080125;NM_001228,NM_001080124;NM_033355;NM_033358;NM_001080125;NM_001228,NM_001080124;NM_033355;NM_033358;NM_001080125;NM_001228,NM_001080124;NM_033355;NM_033358;NM_001228;NM_001080125,NM_001080124;NM_033355;NM_033358;NM_001228;NM_001080125,NM_001080124;NM_033355;NM_033358;NM_001080125;NM_001080125;NM_001228,NM_001080124;NM_033355;NM_033358;NM_001080125;NM_0…	hyperM.iPSC
2	202192113	202192491	5	cg04411541,cg22981993,cg15780361,cg12260435,cg13265524	1stExon;5'UTR;5'UTR;1stExon;1stExon;1stExon;5'UTR;5'UTR,TSS200;TSS200;TSS200;TSS200,TSS200;TSS200;TSS200;TSS200,TSS1500;TSS1500;TSS1500;TSS1500,TSS1500;TSS1500;TSS1500;TSS1500	Island,S_Shore,S_Shore,S_Shore,S_Shore	ALS2CR11;ALS2CR11;ALS2CR11;ALS2CR11;ALS2CR11;ALS2CR11;ALS2CR11;ALS2CR11,ALS2CR11;ALS2CR11;ALS2CR11;ALS2CR11,ALS2CR11;ALS2CR11;ALS2CR11;ALS2CR11,ALS2CR11;ALS2CR11;ALS2CR11;ALS2CR11,ALS2CR11;ALS2CR11;ALS2CR11;ALS2CR11	NM_001168217;NM_001168217;NM_152525;NM_001168216;NM_152525;NM_001168221;NM_001168221;NM_001168216,NM_152525;NM_001168221;NM_001168216;NM_001168217,NM_152525;NM_001168221;NM_001168216;NM_001168217,NM_001168216;NM_001168221;NM_001168217;NM_152525,NM_001168216;NM_001168221;NM_001168217;NM_152525	hyperM.iPSC
2	202216575	202217017	2	cg02562052,cg14791081	TSS200;TSS1500,TSS1500;TSS1500	S_Shore,S_Shore	ALS2CR4;ALS2CR4,ALS2CR4;ALS2CR4	NM_001044385;NM_152388,NM_001044385;NM_152388	hyperM.iPSC
2	202379403	202379537	2	cg19654437,cg14695751	TSS200,5'UTR	_,_	CDK15,CDK15	NM_139158,NM_139158	hyperM.iPSC
2	202522471	202522768	5	cg20373544,cg19214097,cg03170036,cg26360026,cg23517999	_,_	_,_	_,_	_,_	hypoM.iPSC
2	202609290	202609715	5	cg02697649,cg11613003,cg27638615,cg03345454,cg10634136	1stExon,1stExon;3'UTR,1stExon;3'UTR,1stExon;3'UTR,1stExon;3'UTR	Island,S_Shore,S_Shore,S_Shore,S_Shore	FZD7,FZD7;FZD7,FZD7;FZD7,FZD7;FZD7,FZD7;FZD7	NM_003507,NM_003507;NM_003507,NM_003507;NM_003507,NM_003507;NM_003507,NM_003507;NM_003507	hypoM.iPSC
2	202682669	202683491	2	cg12598581,cg19907380	_,_	_,_	_,_	_,_	hyperM.iPSC
2	202849048	202849480	2	ch.2.4034195R,cg11667301	Body;TSS1500,Body;Body	_,_	NOP58;SNORD70,SNORD70;NOP58	NM_015934;NR_003058,NR_003058;NM_015934	hyperM.iPSC
2	204440719	204440932	2	cg08460026,cg05074138	TSS200;TSS200,1stExon;1stExon	_,_	CTLA4;CTLA4,CTLA4;CTLA4	NM_001037631;NM_005214,NM_001037631;NM_005214	hyperM.iPSC
2	205119769	205120031	2	cg25149218,cg08138586	Body;Body;Body,Body;Body;Body	S_Shore,S_Shore	PARD3B;PARD3B;PARD3B,PARD3B;PARD3B;PARD3B	NM_152526;NM_057177;NM_205863,NM_152526;NM_057177;NM_205863	hyperM.iPSC
2	206259457	206260232	5	cg01323148,cg10648139,cg17455088,cg19795793,cg02183001	Body;Body;Body;Body;Body;Body,Body;Body;Body;Body;Body;Body,Body;Body;Body;Body;Body;Body,Body;Body;Body;Body;Body;Body,Body;Body;Body;Body;Body;Body	Island,S_Shore,S_Shore,S_Shore,S_Shore	NRP2;NRP2;NRP2;NRP2;NRP2;NRP2,NRP2;NRP2;NRP2;NRP2;NRP2;NRP2,NRP2;NRP2;NRP2;NRP2;NRP2;NRP2,NRP2;NRP2;NRP2;NRP2;NRP2;NRP2,NRP2;NRP2;NRP2;NRP2;NRP2;NRP2	NM_201279;NM_018534;NM_201264;NM_201267;NM_003872;NM_201266,NM_201279;NM_018534;NM_201264;NM_201267;NM_003872;NM_201266,NM_201279;NM_018534;NM_201264;NM_201267;NM_003872;NM_201266,NM_201279;NM_018534;NM_201264;NM_201267;NM_003872;NM_201266,NM_201279;NM_018534;NM_201264;NM_201267;NM_003872;NM_201266	hypoM.iPSC
2	206336798	206336870	2	cg22308949,cg05348875	Body;Body;Body;Body;Body,Body;Body;Body;Body;Body	_,_	NRP2;NRP2;NRP2;NRP2;NRP2,NRP2;NRP2;NRP2;NRP2;NRP2	NM_201279;NM_018534;NM_201267;NM_003872;NM_201266,NM_201279;NM_018534;NM_201267;NM_003872;NM_201266	hypoM.iPSC
2	206349333	206349440	2	cg05025612,cg22233579	Body;Body;Body;Body;Body,Body;Body;Body;Body;Body	_,_	NRP2;NRP2;NRP2;NRP2;NRP2,NRP2;NRP2;NRP2;NRP2;NRP2	NM_201279;NM_018534;NM_201267;NM_003872;NM_201266,NM_201279;NM_018534;NM_201267;NM_003872;NM_201266	hypoM.iPSC
2	206498061	206498878	2	cg01491071,cg14233644	_,_	N_Shore,Island	_,_	_,_	hyperM.iPSC
2	206733662	206733722	2	cg27248887,cg12608507	Body;Body;TSS1500;TSS1500;Body,Body;Body;TSS1500;TSS1500;TSS1500;Body	S_Shore,S_Shore	EEF1B2;EEF1B2;SNORD51;NDUFS1;EEF1B2,EEF1B2;EEF1B2;SNORD51;NDUFS1;SNORA41;EEF1B2	NM_001037663;NM_001959;NR_002589;NM_005006;NM_021121,NM_001037663;NM_001959;NR_002589;NM_005006;NR_002590;NM_021121	hyperM.iPSC
2	207015395	207015789	3	cg24399540,cg27380819,cg04307977	TSS1500,TSS1500,TSS1500	N_Shore,N_Shore,N_Shore	ADAM23,ADAM23,ADAM23	NM_003812,NM_003812,NM_003812	hyperM.iPSC
2	207214725	207214780	2	cg01036351,cg23094961	TSS1500,TSS1500	N_Shore,N_Shore	LOC200726,LOC200726	NM_001102659,NM_001102659	hyperM.iPSC
2	208598741	208599047	3	cg06732666,cg09368486,cg19154323	TSS1500,TSS1500,TSS1500	S_Shore,S_Shore,S_Shore	PLEKHM3,PLEKHM3,PLEKHM3	NM_001080475,NM_001080475,NM_001080475	hyperM.iPSC
2	208697569	208698483	3	cg25429719,cg00018606,cg09453636	TSS200,TSS200,TSS1500	S_Shore,S_Shore,S_Shore	CRYGD,CRYGD,CRYGD	NM_006891,NM_006891,NM_006891	hyperM.iPSC
2	208719231	208719298	2	cg19855215,cg17314180	TSS200,TSS200	_,_	CRYGB,CRYGB	NM_005210,NM_005210	hyperM.iPSC
2	208720433	208720540	2	cg11942086,cg00823148	TSS1500,TSS1500	_,_	CRYGB,CRYGB	NM_005210,NM_005210	hyperM.iPSC
2	208737839	208737935	2	cg07313720,cg22386774	TSS1500,TSS1500	_,_	CRYGA,CRYGA	NM_014617,NM_014617	hyperM.iPSC
2	208762915	208763396	2	cg26750742,cg08095437	5'UTR,TSS1500	_,_	C2orf80,C2orf80	NM_001099334,NM_001099334	hyperM.iPSC
2	208980231	208980302	2	cg06562306,cg22680399	Body,Body	Island,S_Shore	PTH2R,PTH2R	NM_005048,NM_005048	hyperM.iPSC
2	210151556	210152572	4	cg15310568,cg10562586,cg10861541,cg27662832	TSS1500;TSS1500;TSS1500;5'UTR,TSS1500;TSS1500;TSS1500;5'UTR,TSS1500;TSS1500;TSS1500;5'UTR,TSS200;TSS200;TSS200;5'UTR	_,_	MAP2;MAP2;MAP2;MAP2,MAP2;MAP2;MAP2;MAP2,MAP2;MAP2;MAP2;MAP2,MAP2;MAP2;MAP2;MAP2	NM_031847;NM_031845;NM_002374;NM_001039538,NM_031847;NM_031845;NM_002374;NM_001039538,NM_031847;NM_031845;NM_002374;NM_001039538,NM_031845;NM_031847;NM_002374;NM_001039538	hyperM.iPSC
2	210382274	210382309	2	cg22019065,cg13086402	Body;Body,Body;Body	Island,Island	UNC80;UNC80,UNC80;UNC80	NM_032504;NM_182587,NM_032504;NM_182587	hyperM.iPSC
2	210383685	210384596	2	cg05894754,cg19053250	Body;Body,Body;Body	S_Shore,S_Shelf	UNC80;UNC80,UNC80;UNC80	NM_032504;NM_182587,NM_032504;NM_182587	hyperM.iPSC
2	210888246	210888631	2	cg25278347,cg22904096	TSS200,TSS1500	_,_	MYL1,MYL1	NM_079420,NM_079420	hyperM.iPSC
2	214984401	214984570	2	cg06580419,cg19536559	TSS1500,TSS200	_,_	VWC2L,VWC2L	NM_001080500,NM_001080500	hyperM.iPSC
2	216007693	216007790	2	cg11309217,cg03228449	Body;Body;Body;Body;Body;Body;Body,Body;Body;Body;Body;Body;Body;Body	N_Shore,N_Shore	FN1;FN1;FN1;FN1;FN1;FN1;FN1,FN1;FN1;FN1;FN1;FN1;FN1;FN1	NM_054034;NM_212475;NM_212476;NM_212478;NM_212474;NM_212482;NM_002026,NM_054034;NM_212475;NM_212476;NM_212478;NM_212474;NM_212482;NM_002026	hyperM.iPSC
2	216208170	216208882	2	ch.2.216208170F,cg21579959	_,_	_,_	_,_	_,_	hyperM.iPSC
2	216416615	216416623	2	cg12535109,cg08729279	_,_	_,_	_,_	_,_	hyperM.iPSC
2	217208839	217209826	4	cg23059946,cg11669516,cg20366479,cg22979368	Body,Body,Body,Body	S_Shore,S_Shelf,S_Shelf,S_Shelf	IGFBP2,IGFBP2,IGFBP2,IGFBP2	NM_000597,NM_000597,NM_000597,NM_000597	hypoM.iPSC
2	218476825	218478453	3	cg01138706,cg13419986,cg06320380	5'UTR,5'UTR,5'UTR	_,_	TNS1,TNS1,TNS1	NM_022648,NM_022648,NM_022648	hyperM.iPSC
2	218551680	218551749	2	cg20225999,cg07616871	_,_	N_Shore,Island	_,_	_,_	hypoM.iPSC
2	218606736	218607033	4	cg00122854,cg12924402,cg03832522,cg23940612	_,_	Island,Island,Island,Island	_,_	_,_	hypoM.iPSC
2	218697624	218698288	3	cg17081998,cg25941354,cg19225688	TSS1500;TSS1500,TSS1500;TSS200,TSS1500;1stExon;5'UTR	_,_	CXCR2;CXCR2,CXCR2;CXCR2,CXCR2;CXCR2;CXCR2	NM_001557;NM_001168298,NM_001557;NM_001168298,NM_001557;NM_001168298;NM_001168298	hyperM.iPSC
2	218707035	218707418	2	cg14652717,cg02937802	5'UTR;5'UTR,5'UTR;5'UTR	_,_	CXCR2;CXCR2,CXCR2;CXCR2	NM_001557;NM_001168298,NM_001557;NM_001168298	hyperM.iPSC
2	218738368	218741130	6	cg13048967,cg15768138,cg13519373,cg18956547,cg21004129,cg14702787	5'UTR,5'UTR,5'UTR,TSS200,TSS1500,TSS1500	_,_	CXCR1,CXCR1,CXCR1,CXCR1,CXCR1,CXCR1	NM_000634,NM_000634,NM_000634,NM_000634,NM_000634,NM_000634	hyperM.iPSC
2	218832508	218832516	2	cg20655350,cg18581950	TSS1500;TSS1500;TSS1500,TSS1500;TSS1500;TSS1500	_,_	GPBAR1;GPBAR1;GPBAR1,GPBAR1;GPBAR1;GPBAR1	NM_001077191;NM_001077194;NM_170699,NM_001077191;NM_001077194;NM_170699	hyperM.iPSC
2	218845734	218846068	2	cg22929506,cg01741999	3'UTR;Body,Body	S_Shelf,S_Shelf	PNKD;PNKD,PNKD	NM_001077399;NM_015488,NM_015488	hyperM.iPSC
2	218863492	218863622	2	cg03627290,cg25353281	Body;5'UTR,Body;5'UTR	N_Shore,N_Shore	PNKD;TMBIM1,PNKD;TMBIM1	NM_015488;NM_022152,NM_015488;NM_022152	hyperM.iPSC
2	218941119	218941894	2	cg16829809,cg04364261	_,_	Island,S_Shore	_,_	_,_	hyperM.iPSC
2	218975442	218975687	4	cg19223411,cg08460635,cg14045814,cg23131909	Body;Body;TSS200,Body;Body;TSS200,Body;Body;TSS200,Body;Body;Body	S_Shore,S_Shore,S_Shore,S_Shore	CTDSP1;CTDSP1;MIR26B,CTDSP1;CTDSP1;MIR26B,CTDSP1;CTDSP1;MIR26B,MIR26B;CTDSP1;CTDSP1	NM_182642;NM_021198;NR_029500,NM_182642;NM_021198;NR_029500,NM_182642;NM_021198;NR_029500,NR_029500;NM_182642;NM_021198	hyperM.iPSC
2	219180654	219180968	3	cg18887096,cg17980119,cg27369013	TSS1500,TSS200,1stExon;5'UTR	_,_	PLCD4,PLCD4,PLCD4;PLCD4	NM_032726,NM_032726,NM_032726;NM_032726	hyperM.iPSC
2	219284627	219284783	2	cg25925210,cg02176678	5'UTR,5'UTR	S_Shore,S_Shore	TTLL4,TTLL4	NM_014640,NM_014640	hyperM.iPSC
2	219404716	219406178	5	cg23081213,cg01357713,cg25815024,cg09244100,cg19075252	1stExon,TSS200,TSS200,TSS1500,TSS1500	_,_	PRKAG3,PRKAG3,PRKAG3,PRKAG3,PRKAG3	NM_017431,NM_017431,NM_017431,NM_017431,NM_017431	hyperM.iPSC
2	219446958	219446976	2	cg13903421,cg25242471	3'UTR,3'UTR	Island,Island	WNT6,WNT6	NM_006522,NM_006522	hypoM.iPSC
2	219452841	219452878	3	cg19868691,cg00821731,cg12014818	TSS1500,TSS1500,TSS1500	N_Shore,N_Shore,N_Shore	WNT10A,WNT10A,WNT10A	NM_025216,NM_025216,NM_025216	hypoM.iPSC
2	219463060	219463084	2	cg14663607,cg26449951	Body,Body	N_Shelf,N_Shelf	WNT10A,WNT10A	NM_025216,NM_025216	hypoM.iPSC
2	219469871	219470097	2	cg16653495,cg19887502	_,_	N_Shore,N_Shore	_,_	_,_	hypoM.iPSC
2	219481660	219481791	3	cg00306112,cg03225109,cg19153133	_,_	N_Shore,N_Shore,Island	_,_	_,_	hyperM.iPSC
2	219533005	219535438	7	cg01920829,cg16831573,cg12156672,cg08724891,cg02614660,cg03164275,cg01153287	1stExon,1stExon,3'UTR;1stExon,3'UTR;1stExon,3'UTR;1stExon,3'UTR;1stExon,_	Island,Island,Island,N_Shore,N_Shore,N_Shore,N_Shore	CDK5R2,CDK5R2,CDK5R2;CDK5R2,CDK5R2;CDK5R2,CDK5R2;CDK5R2,CDK5R2;CDK5R2,_	NM_003936,NM_003936,NM_003936;NM_003936,NM_003936;NM_003936,NM_003936;NM_003936,NM_003936;NM_003936,_	hyperM.iPSC
2	219548593	219549378	3	cg10930290,cg20174730,cg19716702	TSS1500;TSS1500,TSS200;TSS200,Body;Body	_,_	LOC151300;LOC151300,LOC151300;LOC151300,LOC151300;LOC151300	NR_015390;NR_024385,NR_024385;NR_015390,NR_015390;NR_024385	hyperM.iPSC
2	219567939	219568623	2	cg16938613,cg12941249	_,_	N_Shore,N_Shore	_,_	_,_	hyperM.iPSC
2	219593858	219594083	2	cg06755438,cg25054180	Body,Body	_,_	CCDC108,CCDC108	NM_194302,NM_194302	hyperM.iPSC
2	219732850	219732974	2	cg08530484,cg11765003	5'UTR,5'UTR	N_Shore,N_Shore	NHEJ1,NHEJ1	NM_024782,NM_024782	hyperM.iPSC
2	219744003	219744206	2	cg04980991,cg18822719	TSS1500;TSS1500;TSS1500,TSS1500;TSS1500;TSS1500	_,_	SLC23A3;SLC23A3;SLC23A3,SLC23A3;SLC23A3;SLC23A3	NM_001144890;NM_001144889;NM_144712,NM_001144890;NM_001144889;NM_144712	hyperM.iPSC
2	219816338	219816511	2	cg20314884,cg09715285	Body,Body	Island,Island	GLB1L,GLB1L	NM_024506,NM_024506	hyperM.iPSC
2	219851147	219851469	2	cg03922748,cg13388731	TSS1500;TSS1500,TSS1500;TSS1500	N_Shore,N_Shore	DNAJB2;DNAJB2,DNAJB2;DNAJB2	NM_001039550;NM_006736,NM_001039550;NM_006736	hyperM.iPSC
2	219907452	219907554	2	cg19020434,cg23985420	TSS1500,TSS1500	S_Shelf,S_Shelf	RESP18,RESP18	NM_001007089,NM_001007089	hyperM.iPSC
2	219961900	219961912	2	cg00244308,cg22888752	TSS1500,TSS1500	S_Shore,S_Shore	DNPEP,DNPEP	NM_012100,NM_012100	hyperM.iPSC
2	220021397	220021901	4	cg02323356,cg01727145,cg05351827,cg25008858	Body,Body,Body,Body	Island,Island,Island,Island	SPEG,SPEG,SPEG,SPEG	NM_005876,NM_005876,NM_005876,NM_005876	hypoM.iPSC
2	220033613	220033619	2	cg21117965,cg07974504	Body,Body	_,_	SPEG,SPEG	NM_005876,NM_005876	hypoM.iPSC
2	220069307	220069711	2	cg02549182,cg11361344	_,_	N_Shore,Island	_,_	_,_	hypoM.iPSC
2	220079943	220079997	2	cg09342325,cg25552705	3'UTR;3'UTR,_	_,_	GMPPA;GMPPA,_	NM_205847;NM_013335,_	hypoM.iPSC
2	220087244	220087443	2	cg18844301,cg12046414	5'UTR;1stExon;5'UTR;1stExon,1stExon;1stExon	S_Shore,S_Shore	ACCN4;ACCN4;ACCN4;ACCN4,ACCN4;ACCN4	NM_182847;NM_018674;NM_018674;NM_182847,NM_018674;NM_182847	hyperM.iPSC
2	220111015	220112062	3	cg02197228,cg26142972,cg04729655	3'UTR;3'UTR,3'UTR;3'UTR,3'UTR	N_Shore,N_Shore,N_Shore	ACCN4;ACCN4,ACCN4;ACCN4,CHPF	NM_018674;NM_182847,NM_018674;NM_182847,NM_024536	hypoM.iPSC
2	220123445	220124392	2	cg03830936,cg16507172	3'UTR,Body	N_Shore,N_Shore	TMEM198,OBSL1	NM_001005209,NM_015311	hyperM.iPSC
2	220145165	220145180	2	cg22065526,cg08493959	TSS1500;TSS200,TSS1500;TSS200	S_Shore,S_Shore	OBSL1;INHA,OBSL1;INHA	NM_015311;NM_002191,NM_015311;NM_002191	hyperM.iPSC
2	220200078	220200151	2	cg08274552,cg22732731	TSS1500;TSS1500,TSS1500;TSS1500	N_Shore,N_Shore	SLC4A3;SLC4A3,SLC4A3;SLC4A3	NM_201574;NM_005070,NM_201574;NM_005070	hypoM.iPSC
2	220425038	220425364	2	cg00772991,cg04790977	_,_	_,_	_,_	_,_	hyperM.iPSC
2	222142547	222143022	3	cg18527574,cg16786808,cg00692780	Body,Body,Body	N_Shore,N_Shore,N_Shore	EPHA4,EPHA4,EPHA4	NM_004438,NM_004438,NM_004438	hypoM.iPSC
2	222147162	222147222	3	cg02431065,cg24703390,cg08089542	_,_	Island,S_Shore,S_Shore	_,_	_,_	hyperM.iPSC
2	222864380	222865509	3	cg15775921,cg25809290,cg04407305	Body;Body;Body;Body;Body;Body,Body;Body;Body;Body;Body;Body,Body;Body;Body;Body;Body;Body	Island,S_Shore,S_Shore	PAX3;PAX3;PAX3;PAX3;PAX3;PAX3,PAX3;PAX3;PAX3;PAX3;PAX3;PAX3,PAX3;PAX3;PAX3;PAX3;PAX3;PAX3	NM_181458;NM_181461;NM_181459;NM_181460;NM_181457;NM_001127366,NM_181458;NM_181461;NM_181459;NM_181460;NM_181457;NM_001127366,NM_181458;NM_181461;NM_181459;NM_181460;NM_181457;NM_001127366	hypoM.iPSC
2	222870910	222871277	5	cg14093610,cg01790894,cg10416206,cg13767755,cg23546474	Body;Body;Body;Body;Body;Body;Body;Body;TSS200,Body;Body;Body;Body;Body;Body;Body;Body;TSS200,Body;Body;Body;Body;Body;Body;Body;Body;TSS200,Body;Body;Body;Body;Body;Body;Body;Body;TSS200,Body;Body;Body;5'UTR;1stExon;Body;Body;Body;Body;Body	N_Shore,N_Shore,N_Shore,N_Shore,Island	PAX3;PAX3;PAX3;PAX3;PAX3;PAX3;PAX3;PAX3;CCDC140,PAX3;PAX3;PAX3;PAX3;PAX3;PAX3;PAX3;PAX3;CCDC140,PAX3;PAX3;PAX3;PAX3;PAX3;PAX3;PAX3;PAX3;CCDC140,PAX3;PAX3;PAX3;PAX3;PAX3;PAX3;PAX3;PAX3;CCDC140,PAX3;PAX3;PAX3;CCDC140;CCDC140;PAX3;PAX3;PAX3;PAX3;PAX3	NM_181458;NM_013942;NM_181457;NM_000438;NM_181461;NM_181460;NM_181459;NM_001127366;NM_153038,NM_181458;NM_013942;NM_181457;NM_000438;NM_181461;NM_181460;NM_181459;NM_001127366;NM_153038,NM_181458;NM_013942;NM_181457;NM_000438;NM_181461;NM_181460;NM_181459;NM_001127366;NM_153038,NM_181458;NM_013942;NM_181457;NM_000438;NM_181461;NM_181460;NM_181459;NM_001127366;NM_153038,NM_181458;NM_013942;NM_1814…	hypoM.iPSC
2	222873075	222873113	3	cg27480727,cg16529477,cg19352038	TSS1500;TSS1500;TSS1500;TSS1500;TSS1500;5'UTR;TSS1500;TSS1500;TSS1500,TSS1500;TSS1500;TSS1500;TSS1500;TSS1500;5'UTR;TSS1500;TSS1500;TSS1500,TSS1500;TSS1500;TSS1500;TSS1500;TSS1500;5'UTR;TSS1500;TSS1500;TSS1500	S_Shore,S_Shore,S_Shore	PAX3;PAX3;PAX3;PAX3;PAX3;CCDC140;PAX3;PAX3;PAX3,PAX3;PAX3;PAX3;PAX3;PAX3;CCDC140;PAX3;PAX3;PAX3,PAX3;PAX3;PAX3;PAX3;PAX3;CCDC140;PAX3;PAX3;PAX3	NM_013942;NM_000438;NM_181460;NM_181457;NM_181458;NM_153038;NM_181461;NM_001127366;NM_181459,NM_013942;NM_000438;NM_181460;NM_181457;NM_181458;NM_153038;NM_181461;NM_001127366;NM_181459,NM_013942;NM_000438;NM_181460;NM_181457;NM_181458;NM_153038;NM_181461;NM_001127366;NM_181459	hypoM.iPSC
2	222877105	222877853	2	cg08506931,cg09486778	Body,3'UTR	Island,N_Shore	CCDC140,CCDC140	NM_153038,NM_153038	hypoM.iPSC
2	222884927	222885737	3	cg09643136,cg01997590,cg05214685	_,_	Island,Island,Island	_,_	_,_	hypoM.iPSC
2	222998412	222998759	3	cg16764274,cg19416417,cg16171484	Body,Body,Body	S_Shore,S_Shore,S_Shore	SGPP2,SGPP2,SGPP2	NM_152386,NM_152386,NM_152386	hypoM.iPSC
2	224175293	224175603	2	cg23988310,cg21616047	5'UTR;1stExon,TSS1500	_,_	SCG2;SCG2,SCG2	NM_003469;NM_003469,NM_003469	hyperM.iPSC
2	224518456	224518958	2	cg13385881,cg04969921	TSS200,TSS1500	Island,S_Shore	WDFY1,WDFY1	NM_020830,NM_020830	hyperM.iPSC
2	224751193	224751289	2	ch.2.4489892R,cg22925840	_,_	_,_	_,_	_,_	hyperM.iPSC
2	224974900	224975124	3	cg00698413,cg01833675,cg19268119	5'UTR;1stExon;1stExon;5'UTR,TSS200;TSS200,TSS200;TSS200	_,_	FAM124B;FAM124B;FAM124B;FAM124B,FAM124B;FAM124B,FAM124B;FAM124B	NM_024785;NM_024785;NM_001122779;NM_001122779,NM_024785;NM_001122779,NM_024785;NM_001122779	hyperM.iPSC
2	225015145	225015916	3	cg10193763,cg00754688,cg05299342	_,_	Island,Island,S_Shore	_,_	_,_	hyperM.iPSC
2	225613985	225614329	2	cg22640209,cg04318855	Body,Body	N_Shore,N_Shore	DOCK10,DOCK10	NM_014689,NM_014689	hyperM.iPSC
2	225615783	225616119	4	cg16303846,cg11249313,cg00358213,cg02441556	TSS1500,TSS1500,TSS1500,TSS1500	S_Shore,S_Shore,S_Shore,S_Shore	DOCK10,DOCK10,DOCK10,DOCK10	NM_014689,NM_014689,NM_014689,NM_014689	hyperM.iPSC
2	225972789	225974043	3	cg25299371,cg06753901,cg01827195	TSS1500,TSS1500,5'UTR	_,_	KIAA1486,KIAA1486,KIAA1486	NM_020864,NM_020864,NM_020864	hyperM.iPSC
2	226996571	226996762	2	cg14637919,cg05209518	_,_	_,_	_,_	_,_	hyperM.iPSC
2	227369457	227369900	2	cg17848496,cg14078053	1stExon,1stExon	N_Shore,N_Shore	IRS1,IRS1	NM_005544,NM_005544	hyperM.iPSC
2	227370948	227371395	3	cg00727310,cg13008631,cg08166272	1stExon,1stExon,1stExon	Island,Island,Island	IRS1,IRS1,IRS1	NM_005544,NM_005544,NM_005544	hyperM.iPSC
2	229844655	229844754	2	cg02799466,cg06064269	TSS1500;TSS1500,TSS1500;TSS1500	S_Shore,S_Shore	PID1;PID1,PID1;PID1	NM_001100818;NM_017933,NM_001100818;NM_017933	hypoM.iPSC
2	229846448	229846986	2	cg18310658,cg22697682	_,_	S_Shelf,S_Shelf	_,_	_,_	hyperM.iPSC
2	230493294	230493424	2	cg12048425,cg20959174	5'UTR,5'UTR	N_Shore,N_Shore	TRIP12,TRIP12	NM_004238,NM_004238	hyperM.iPSC
2	230793185	230793209	2	cg04679072,cg25728166	TSS200;TSS200;TSS200,TSS200;TSS200;TSS200	_,_	SP110;SP110;SP110,SP110;SP110;SP110	NM_004510;NM_080424;NM_004509,NM_004510;NM_080424;NM_004509	hyperM.iPSC
2	230798573	230798989	3	cg17607231,cg12976883,cg04579254	TSS200;TSS200,TSS200;TSS200,Body;Body	_,_	SP140;SP140,SP140;SP140,SP140;SP140	NM_001005176;NM_007237,NM_001005176;NM_007237,NM_001005176;NM_007237	hyperM.iPSC
2	230899906	230900160	4	cg24044052,cg13278004,cg04002454,cg26847438	TSS1500,TSS200,5'UTR;1stExon,5'UTR;1stExon	_,_	SP140L,SP140L,SP140L;SP140L,SP140L;SP140L	NM_138402,NM_138402,NM_138402;NM_138402,NM_138402;NM_138402	hyperM.iPSC
2	230989122	230989718	5	cg09456094,cg11827097,cg11702456,cg02001779,cg05091653	5'UTR;1stExon;1stExon;5'UTR,5'UTR;1stExon;1stExon;5'UTR,5'UTR;1stExon;1stExon;5'UTR,Body;Body,Body;Body	_,_	SP100;SP100;SP100;SP100,SP100;SP100;SP100;SP100,SP100;SP100;SP100;SP100,SP100;SP100,SP100;SP100	NM_001080391;NM_003113;NM_001080391;NM_003113,NM_001080391;NM_003113;NM_001080391;NM_003113,NM_001080391;NM_003113;NM_001080391;NM_003113,NM_003113;NM_001080391,NM_003113;NM_001080391	hyperM.iPSC
2	231396984	231397167	2	cg17755610,cg10803767	_,_	N_Shelf,N_Shelf	_,_	_,_	hyperM.iPSC
2	231498773	231499057	2	cg14254999,cg13531460	TSS1500,TSS1500	_,_	GPR55,GPR55	NM_005683,NM_005683	hyperM.iPSC
2	231625458	231626129	3	cg14731570,cg00914626,cg21047583	_,_	N_Shore,Island,S_Shore	_,_	_,_	hyperM.iPSC
2	232056166	232057038	5	cg06281680,cg03727500,cg05868531,cg15371801,cg11559198	_,_	N_Shore,Island,Island,Island,Island	_,_	_,_	hyperM.iPSC
2	232103570	232104485	5	cg18877969,cg16297948,cg20082830,cg18250832,cg24430754	TSS200,TSS200,TSS200,TSS1500,TSS1500	Island,Island,S_Shore,S_Shore,S_Shore	NMUR1,NMUR1,NMUR1,NMUR1,NMUR1	NM_006056,NM_006056,NM_006056,NM_006056,NM_006056	hyperM.iPSC
2	232164533	232166029	4	cg19540408,cg03901836,cg05689582,cg11784281	TSS1500,TSS1500,5'UTR;1stExon,1stExon	_,_	C2orf57,C2orf57,C2orf57;C2orf57,C2orf57	NM_152614,NM_152614,NM_152614;NM_152614,NM_152614	hyperM.iPSC
2	232177265	232177392	2	cg26796670,cg03238981	_,_	N_Shore,Island	_,_	_,_	hyperM.iPSC
2	232216018	232216086	2	cg10318368,cg17490196	_,_	_,_	_,_	_,_	hyperM.iPSC
2	232465224	232466468	5	cg18094076,cg12035782,cg25883149,cg06046580,cg07513814	Body,TSS200,TSS200,TSS1500,TSS1500	_,_	MIR1471,MIR1471,MIR1471,MIR1471,MIR1471	NR_031717,NR_031717,NR_031717,NR_031717,NR_031717	hyperM.iPSC
2	232473418	232473998	3	cg01022012,cg21124375,cg26820327	_,_	N_Shore,Island,S_Shore	_,_	_,_	hypoM.iPSC
2	232888238	232888659	2	ch.2.4671106R,cg08467371	Body,Body	_,_	DIS3L2,DIS3L2	NM_152383,NM_152383	hyperM.iPSC
2	232923790	232924464	2	cg09701000,cg11946719	_,_	N_Shore,Island	_,_	_,_	hyperM.iPSC
2	232954380	232954838	2	cg22403782,cg19713851	Body,3'UTR	Island,S_Shore	ALPP,ALPP	NM_001632,NM_001632	hyperM.iPSC
2	232958614	232959274	4	cg27241845,cg08690379,cg23288337,cg00706683	_,Body,Body,Body	N_Shore,N_Shore,N_Shore,N_Shore	_,ECEL1P2,ECEL1P2,ECEL1P2	_,NR_028501,NR_028501,NR_028501	hyperM.iPSC
2	233028730	233030072	5	cg07058918,cg13481776,cg04519870,cg01611894,cg17875028	TSS1500,TSS1500,TSS200,Body,Body	N_Shelf,N_Shelf,N_Shelf,N_Shelf,N_Shore	ALPI,ALPI,ALPI,ALPI,ALPI	NM_001631,NM_001631,NM_001631,NM_001631,NM_001631	hyperM.iPSC
2	233031172	233032179	8	cg25690016,cg23950232,cg19854835,cg12825872,cg12307638,cg23238134,cg22199969,cg26181818	Body,Body,Body,Body,Body,Body,Body,3'UTR	N_Shore,N_Shore,N_Shore,Island,Island,Island,Island,Island	ALPI,ALPI,ALPI,ALPI,ALPI,ALPI,ALPI,ALPI	NM_001631,NM_001631,NM_001631,NM_001631,NM_001631,NM_001631,NM_001631,NM_001631	hyperM.iPSC
2	233061180	233061195	2	cg25431974,cg02932167	TSS1500,TSS1500	Island,Island	ECEL1,ECEL1	NM_004826,NM_004826	hypoM.iPSC
2	233092733	233093492	2	cg25571880,cg10242318	_,_	N_Shelf,N_Shore	_,_	_,_	hyperM.iPSC
2	233098956	233099103	3	cg23398241,cg05875017,cg22276371	TSS1500,TSS200,TSS200	S_Shore,S_Shore,S_Shore	CHRND,CHRND,CHRND	NM_000751,NM_000751,NM_000751	hyperM.iPSC
2	233112464	233112578	2	cg09283548,cg27382389	TSS1500,TSS200	_,_	CHRNG,CHRNG	NM_005199,NM_005199	hyperM.iPSC
2	233633033	233633425	3	cg02935132,cg13434263,cg04126261	TSS1500;TSS1500,5'UTR;5'UTR;1stExon;1stExon,5'UTR;5'UTR;1stExon;1stExon	N_Shore,Island,Island	INPP5D;INPP5D,INPP5D;INPP5D;INPP5D;INPP5D,INPP5D;INPP5D;INPP5D;INPP5D	NM_001017915;NM_005541,NM_005541;NM_001017915;NM_001017915;NM_005541,NM_005541;NM_001017915;NM_001017915;NM_005541	hyperM.iPSC
2	233880789	233880894	2	cg04094641,cg06364159	TSS1500,TSS200	_,_	SAG,SAG	NM_000541,NM_000541	hyperM.iPSC
2	233961051	233961573	3	cg08251704,cg02442900,cg08436419	Body;TSS1500,Body;TSS200,Body;5'UTR;1stExon	_,_	DGKD;DGKD,DGKD;DGKD,DGKD;DGKD;DGKD	NM_152879;NM_003648,NM_152879;NM_003648,NM_152879;NM_003648;NM_003648	hyperM.iPSC
2	234244289	234245220	2	cg22891099,cg00862675	TSS1500;Body;Body,TSS200;Body;Body	_,_	UGT1A9;UGT1A10;UGT1A8,UGT1A9;UGT1A10;UGT1A8	NM_021027;NM_019075;NM_019076,NM_021027;NM_019075;NM_019076	hyperM.iPSC
2	234263765	234265162	3	cg07512295,cg09950076,cg23338993	TSS1500;Body;Body;Body;Body,TSS1500;Body;Body;Body;Body,Body;5'UTR;Body;1stExon;TSS1500;Body;Body	_,_	UGT1A6;UGT1A10;UGT1A9;UGT1A7;UGT1A8,UGT1A6;UGT1A10;UGT1A9;UGT1A7;UGT1A8,UGT1A10;UGT1A6;UGT1A9;UGT1A6;UGT1A6;UGT1A7;UGT1A8	NM_205862;NM_019075;NM_021027;NM_019077;NM_019076,NM_205862;NM_019075;NM_021027;NM_019077;NM_019076,NM_019075;NM_205862;NM_021027;NM_205862;NM_001072;NM_019077;NM_019076	hyperM.iPSC
2	234286311	234286852	2	cg25796050,cg23841280	TSS200;Body;Body;Body;Body;Body;Body,Body;Body;Body;Body;Body;1stExon;Body	_,_	UGT1A5;UGT1A6;UGT1A10;UGT1A9;UGT1A6;UGT1A7;UGT1A8,UGT1A6;UGT1A10;UGT1A9;UGT1A6;UGT1A7;UGT1A5;UGT1A8	NM_019078;NM_001072;NM_019075;NM_021027;NM_205862;NM_019077;NM_019076,NM_001072;NM_019075;NM_021027;NM_205862;NM_019077;NM_019078;NM_019076	hyperM.iPSC
2	234290823	234291203	3	cg05141602,cg02234120,cg25060243	Body;Body;Body;Body;Body;TSS1500;Body;Body,Body;Body;Body;Body;Body;TSS1500;Body;Body,Body;Body;Body;Body;Body;TSS1500;Body;Body	_,_	UGT1A10;UGT1A6;UGT1A8;UGT1A6;UGT1A9;UGT1A4;UGT1A7;UGT1A5,UGT1A10;UGT1A6;UGT1A8;UGT1A6;UGT1A9;UGT1A4;UGT1A7;UGT1A5,UGT1A10;UGT1A6;UGT1A8;UGT1A6;UGT1A9;UGT1A4;UGT1A7;UGT1A5	NM_019075;NM_205862;NM_019076;NM_001072;NM_021027;NM_007120;NM_019077;NM_019078,NM_019075;NM_205862;NM_019076;NM_001072;NM_021027;NM_007120;NM_019077;NM_019078,NM_019075;NM_205862;NM_019076;NM_001072;NM_021027;NM_007120;NM_019077;NM_019078	hyperM.iPSC
2	234327140	234328468	3	cg00963071,cg27361577,cg23229568	Body;Body;Body;Body;Body;Body;Body;Body;Body,Body;Body;Body;Body;Body;Body;Body;Body;Body,Body;Body;Body;Body;Body;Body;Body;Body;Body	N_Shore,N_Shore,Island	UGT1A10;UGT1A6;UGT1A8;UGT1A4;UGT1A3;UGT1A6;UGT1A9;UGT1A7;UGT1A5,UGT1A10;UGT1A6;UGT1A8;UGT1A4;UGT1A3;UGT1A6;UGT1A9;UGT1A7;UGT1A5,UGT1A10;UGT1A6;UGT1A8;UGT1A4;UGT1A3;UGT1A6;UGT1A9;UGT1A7;UGT1A5	NM_019075;NM_205862;NM_019076;NM_007120;NM_019093;NM_001072;NM_021027;NM_019077;NM_019078,NM_019075;NM_205862;NM_019076;NM_007120;NM_019093;NM_001072;NM_021027;NM_019077;NM_019078,NM_019075;NM_205862;NM_019076;NM_007120;NM_019093;NM_001072;NM_021027;NM_019077;NM_019078	hyperM.iPSC
2	234547910	234548601	2	cg10819050,cg25883348	Body,Body	_,_	TRPM8,TRPM8	NM_024080,NM_024080	hyperM.iPSC
2	235071102	235071279	2	cg15235893,cg09935994	TSS1500,TSS1500	Island,Island	ARL4C,ARL4C	NM_005737,NM_005737	hypoM.iPSC
2	235541999	235542915	2	cg00765233,cg21584979	5'UTR,5'UTR	_,_	SH3BP4,SH3BP4	NM_014521,NM_014521	hyperM.iPSC
2	235600493	235601216	4	cg06431347,cg02447239,cg24995678,cg23946364	5'UTR,5'UTR,5'UTR,5'UTR	_,_	SH3BP4,SH3BP4,SH3BP4,SH3BP4	NM_014521,NM_014521,NM_014521,NM_014521	hyperM.iPSC
2	235709483	235709666	3	cg21493483,cg05995360,cg15354666	_,_	_,_	_,_	_,_	hyperM.iPSC
2	235837109	235837179	2	cg21510194,cg09406107	_,_	_,_	_,_	_,_	hyperM.iPSC
2	235958206	235958349	2	cg19435188,cg04752945	_,_	Island,S_Shore	_,_	_,_	hypoM.iPSC
2	235993119	235993252	2	cg15303062,cg02484687	_,_	_,_	_,_	_,_	hyperM.iPSC
2	236151066	236151086	2	cg16085374,cg17472664	Body;Body,Body;Body	_,_	AGAP1;AGAP1,AGAP1;AGAP1	NM_014914;NM_001037131,NM_014914;NM_001037131	hyperM.iPSC
2	236178786	236179210	3	cg19531032,cg20706776,cg27659903	Body;Body,Body;Body,Body;Body	_,_	AGAP1;AGAP1,AGAP1;AGAP1,AGAP1;AGAP1	NM_014914;NM_001037131,NM_014914;NM_001037131,NM_014914;NM_001037131	hyperM.iPSC
2	236380958	236381024	2	cg22764497,cg06694561	Body;Body,Body;Body	_,_	AGAP1;AGAP1,AGAP1;AGAP1	NM_014914;NM_001037131,NM_014914;NM_001037131	hypoM.iPSC
2	236385653	236386508	2	cg14406878,cg22032385	Body;Body,Body;Body	_,_	AGAP1;AGAP1,AGAP1;AGAP1	NM_014914;NM_001037131,NM_014914;NM_001037131	hyperM.iPSC
2	236425679	236425760	2	cg07642035,cg22373519	Body;Body,Body;Body	_,_	AGAP1;AGAP1,AGAP1;AGAP1	NM_014914;NM_001037131,NM_014914;NM_001037131	hypoM.iPSC
2	236437999	236438810	2	cg02244583,cg19761110	Body;Body,Body;Body	N_Shore,Island	AGAP1;AGAP1,AGAP1;AGAP1	NM_014914;NM_001037131,NM_014914;NM_001037131	hyperM.iPSC
2	236555166	236555281	2	cg12157614,cg27634020	Body;Body,Body;Body	_,_	AGAP1;AGAP1,AGAP1;AGAP1	NM_014914;NM_001037131,NM_014914;NM_001037131	hypoM.iPSC
2	236588061	236589049	5	cg14226755,cg11007962,cg20128773,cg14895183,cg26641996	Body;Body,Body;Body,Body;Body,Body;Body,Body;Body	_,_	AGAP1;AGAP1,AGAP1;AGAP1,AGAP1;AGAP1,AGAP1;AGAP1,AGAP1;AGAP1	NM_014914;NM_001037131,NM_014914;NM_001037131,NM_014914;NM_001037131,NM_014914;NM_001037131,NM_014914;NM_001037131	hypoM.iPSC
[truncated: 10,079 more rows]
