# Supplementary material for: A panel of induced pluripotent stem cells from chimpanzees: a resource for comparative functional genomics
Source: eLife journal article supplement (doi:10.7554/elife.07103), 2015-06-23
Supplement: supp [file elife_poa_e07103_Supplementary_File_1.xlsx]

## Sheet: Chimps
Line	Age	Sex	NAME	YERKES ID#	Coriell ID#	Internal ID#	Birthday	Fibroblast provenance	Year/date of biopsy	Date of Transfection	Passage at Transfection	PluriTest pluripotency score (corrected)	PluriTest novelty score (corrected)
C1	9	F	Lizzie	668	S003647	C3647	1990-08-06	Coriell	~1999	2013-08-03	7	20.604	1.82
C2	9	M	Josh	597	S003649	C3649	1990-08-27	Coriell	~1999	2012-09-21	8	24.777	1.797
C3	11	F	Sheena	636	S003651	C3651	1989-01-20	Coriell	~2010	2013-07-30	8	20.08	1.808
C4	13	M	Rhett	573	S004955	C4955	1989-04-20	Coriell	~2002	2013-02-26	9	23.438	1.821
C5	16	M	Barney	575	S008861	C8861	1989-05-06	Coriell	~2005	2013-02-12	7	20.561	1.817
C6	14	F	Julianne	750	n/a	C40210	1998-05-15	Current study	2012-09-05	2013-02-12	7	24.856	1.803
C7	17	F	Abby	726	n/a	C40280	1995-05-11	Current study	2013-01-31	2013-08-04	7	23.239	1.84
