# Supplementary material for: A panel of induced pluripotent stem cells from chimpanzees: a resource for comparative functional genomics
Source: eLife journal article supplement (doi:10.7554/elife.07103), 2015-06-23
Supplement: supp [file elife_poa_e07103_Supplementary_File_3.xlsx]

## Sheet: Sheet1
Line	Sex	Internal ID#	Source cell	Provenance	Ethnicity
H1	M	H20961	Fibroblast	In-house	Caucasian
H2	F	H28834	Fibroblast	In-house	Caucasian
H3	M	Hutt45	LCL	In-house	Caucasian
H4	F	Hutt60	LCL	In-house	Caucasian
H5	F	H18489	LCL	HapMap	Yoruba
H6	M	H19101	LCL	HapMap	Yoruba
H7	F	H19114	LCL	HapMap	Yoruba
