# Supplementary material for: A panel of induced pluripotent stem cells from chimpanzees: a resource for comparative functional genomics
Source: eLife journal article supplement (doi:10.7554/elife.07103), 2015-06-23
Supplement: supp [file elife_poa_e07103_Supplementary_File_7.xlsx]

## Sheet: Sheet1
Diff:	0.1			0.15			0.2			0.3
	Hypomethylated in chimpanzees	Hypermethylated in chimpanzees	Overall	Hypomethylated in chimpanzees	Hypermethylated in chimpanzees	Overall	Hypomethylated in chimpanzees	Hypermethylated in chimpanzees	Overall	Hypomethylated in chimpanzees	Hypermethylated in chimpanzees	Overall
DM Probes	13918	12636	26554	8487	8717	17204	5439	6155	11594	2469	3282	5751
DMRs	1707	1822	3529	1027	1282	2309	671	913	1584	360	525	885
