# Supplementary material for: A panel of induced pluripotent stem cells from chimpanzees: a resource for comparative functional genomics
Source: eLife journal article supplement (doi:10.7554/elife.07103), 2015-06-23
Supplement: supp [file elife_poa_e07103_Supplementary_File_10.xlsx]

## Sheet: Sheet1
		RNA SEQUENCING				H3K27ac			H3K27me3		Input
Line	Raw reads	Mapped reads, hg19 or panTro3	Orthologous kept reads	ENSEMBL genes with log2 CPM >= 1	Raw reads	Mapped after filtering	Peaks after 2-step filtering (MACS)	Raw reads	Mapped after filtering	Peaks after 2-step filtering (RSEG)	Raw reads	Mapped after filtering
C1.iPSC	33459749	30524233	15182908	11177
C2.iPSC	35875936	32567477	15923305	11264	61221338	47280846	73405	161039802	106213483	3511	52798756	40990934
C3.iPSC	35657830	32422858	15427614	11246
C4.iPSC	34073480	31095160	14613157	11156
C5.iPSC	31119671	28304850	13541509	11220	104935463	80742984	87420	55518808	31843011	12195	73517462	54880250
C6.iPSC	42801100	38562145	17764635	11396
C7.iPSC	34195921	31144402	14818795	11290	67254589	52372737	73292	77478085	50795386	8004	39650233	29136930
H1.iPSC	42447555	40419619	18331246	11477
H2.iPSC	35159174	33444171	15164966	11477
H3.iPSC	33260397	31574421	14045731	11637
H4.iPSC	28010126	26840221	13184847	11511
H5.iPSC	35523015	34054785	16274872	11532
H6.iPSC	38288121	36800729	18766069	11246
H7.iPSC	29599183	28383409	13928571	11210
C1.FB	31889759	28807231	17336952	10859
C2.FB	38708130	35031567	21721239	10674
C3.FB	30175149	26556724	15438889	10557
C4.FB	34166745	30942282	18242516	10532
C5.FB	33359571	30153475	18981978	10521
C6.FB	73899370	67229982	41774866	10733
C7.FB	31489426	28276150	16642897	10683
H1.LCL	78510130	73266035	32264785	10429
H2.LCL	83000571	77339796	33832799	10383
H3.LCL	69308293	64231467	27456031	10243
H4.FB	35593269	34079360	20644304	10838
H5.FB	32710965	31101106	18027152	10843
H6.LCL	51986150	48358145	23475406	10209
H7.LCL	31353807	29358771	13887844	10096
HiPSC18a					43428087	32353261	25519	42520201	25733658	13223	32634133	24115144
HiPSC20b					25596019	20010563	49992	35859553	22133007	16191	41031944	29250162
HiPSC.DF.6-9					52284770	28424167	16203	49550021	26131117	2323	36199393	20703353
