# Supplementary material for: A panel of induced pluripotent stem cells from chimpanzees: a resource for comparative functional genomics
Source: eLife journal article supplement (doi:10.7554/elife.07103), 2015-06-23
Supplement: supp [file elife_poa_e07103_Supplementary_File_11.xlsx]

## Sheet: Sheet1
PC	species	tissue	potency	species.tissue
1	0.434827	1.39535e-28	2.92481e-27	2.64464e-13
2	0.00143546	1.83955e-23	2.7941e-25	0.0786235
3	8.57352e-07	0.867172	2.5926e-18	0.714764
4	0.723864	0.963716	0.290899	0.919384
5	0.557641	0.987253	0.0170078	0.878438
6	0.796007	0.980653	0.905462	0.855914
7	0.642278	0.997564	0.120354	0.944097
8	0.909505	0.990501	0.998668	0.891157
9	0.807177	0.996165	0.663065	0.953052
10	0.971709	0.998282	0.991438	0.985754
11	0.817886	0.986738	0.988022	0.991957
12	0.992552	0.989375	0.999227	0.919831
13	0.897766	0.999464	0.995036	0.973629
14	0.990837	0.999127	0.999998	0.993683
15	0.981268	0.998494	0.999774	0.969191
16	0.988036	0.999752	0.999518	0.982052
17	0.98103	0.996104	0.999851	0.959274
18	0.996241	0.999873	0.999992	0.987984
19	0.995334	0.997318	0.999967	0.988001
20	0.979159	0.999399	0.999999	0.97971
21	0.952662	0.99998	0.999991	0.995165
22	0.991892	0.999934	0.999982	0.990961
23	0.957304	0.999927	0.999998	0.990347
24	0.992809	0.999696	0.999957	0.982742
25	0.998693	0.999979	0.999999	0.997911
26	0.981026	0.999975	0.999976	0.997194
27	0.967634	0.999927	0.999999	0.990862
28	0.177578	0.000168224	0.00170205	0.155708
