# Supplementary material for: A panel of induced pluripotent stem cells from chimpanzees: a resource for comparative functional genomics
Source: eLife journal article supplement (doi:10.7554/elife.07103), 2015-06-23
Supplement: supp [file elife_poa_e07103_Supplementary_File_12.xlsx]

## Sheet: Sheet1
PC	species	tissue	potency	species.tissue
1	0.425435	2.85288e-18	6.25993e-17	7.94506e-18
2	1.60951e-05	2.26174e-12	0.320304	4.21868e-16
3	0.00326102	0.22519	0.664022	2.30126e-08
4	0.0402033	0.851399	0.58375	0.00800154
5	0.749628	0.991381	0.961269	0.142411
6	0.676417	0.985554	0.87382	0.138763
7	0.749913	0.94786	0.745202	0.945147
8	0.932674	0.988252	0.937905	0.513229
9	0.964747	0.830956	0.861455	0.861039
10	0.965792	0.980946	0.968378	0.993296
11	0.920872	0.991549	0.981666	0.986256
12	0.920858	0.945357	0.939866	0.994983
13	0.896701	0.995332	0.94781	0.961111
14	0.963678	0.987717	0.945029	0.999915
15	0.947813	0.990868	0.896872	0.995094
16	0.905431	0.999002	0.990063	0.986853
17	0.928744	0.996725	0.953452	0.999854
18	0.992236	0.999462	0.983622	0.99998
19	0.979536	0.998626	0.972088	0.999489
20	0.972433	0.999577	0.980678	0.999995
21	0.935927	0.999941	0.996976	0.999993
22	0.95155	0.999166	0.992996	0.999987
23	0.994726	0.998961	0.998603	0.999993
24	0.989829	0.999575	0.97655	1
25	0.974	0.999985	0.995959	0.999962
26	0.999189	0.999866	0.995016	1
27	0.991141	0.999913	0.995092	0.999997
28	0.0896407	0.407389	0.665515	0.0113986
