# Supplementary material for: A panel of induced pluripotent stem cells from chimpanzees: a resource for comparative functional genomics
Source: eLife journal article supplement (doi:10.7554/elife.07103), 2015-06-23
Supplement: supp [file elife_poa_e07103_Supplementary_File_16.xlsx]

## Sheet: Sheet1
		Testable genes	DE genes, chimpanzee vs human iPSCs	Fraction overlap with final data	DE genes, chimpanzee vs human precursors	Fraction overlap with final data
	no GC content correction, loess by-group normalisation at CPM level	13147	2702	1	5674	1
	GC content correction, loess by-group normalisation at CPM level	13823	2515	0.744925	5797	0.908531
	no GC content correction, quantile by-group normalisation at CPM level	13147	3474	0.965951	5691	0.911526
	GC content correction, quantile by-group normalisation at CPM level	13823	3370	0.823822	5426	0.877377
	no GC content correction, no by-group normalisation at CPM level	13147	2831	0.897853	5913	0.957526
	GC content correction, no by-group normalisation at CPM level	13823	2737	0.76216	5939	0.908169
