# Supplementary figures and images for: A panel of induced pluripotent stem cells from chimpanzees: a resource for comparative functional genomics
Source: eLife journal article supplement (doi:10.7554/elife.07103), 2015-06-23

Hoechst/SSEA1/NANOG

C4

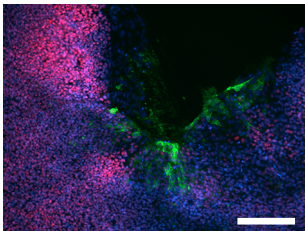

C6

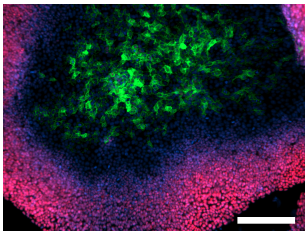

C7

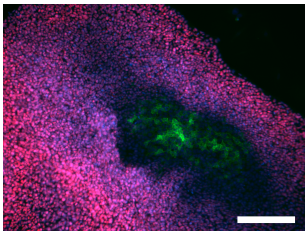

Supplement: supp [file elife-07103-supp-v1.zip]

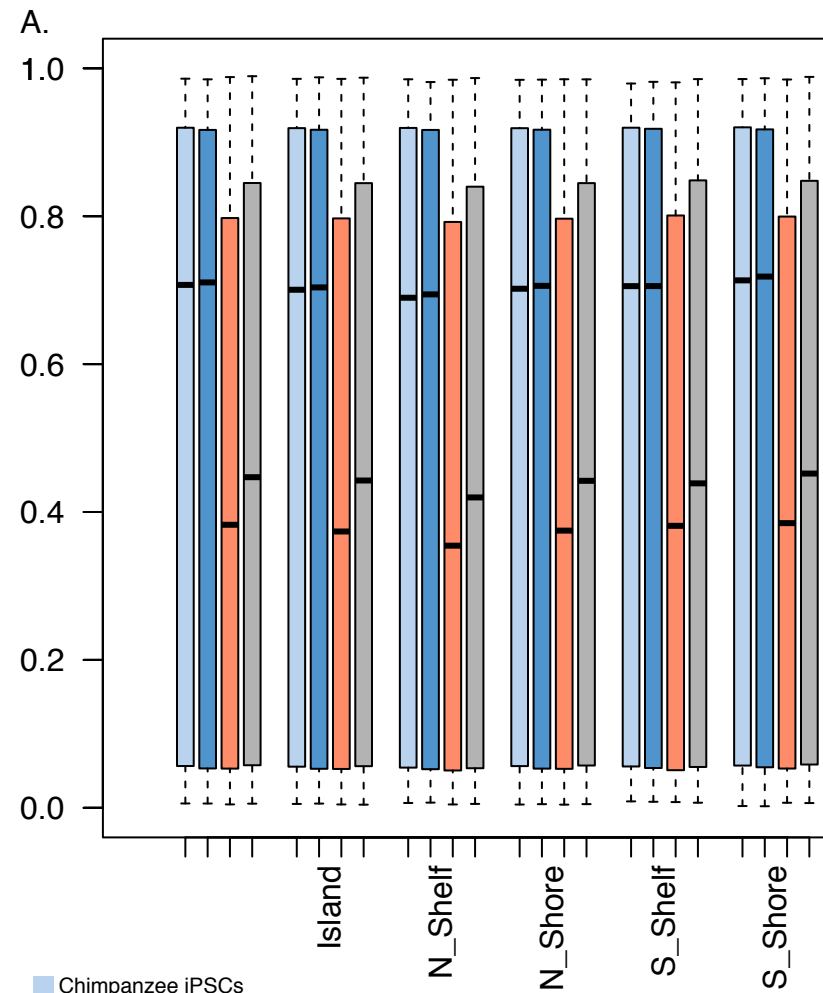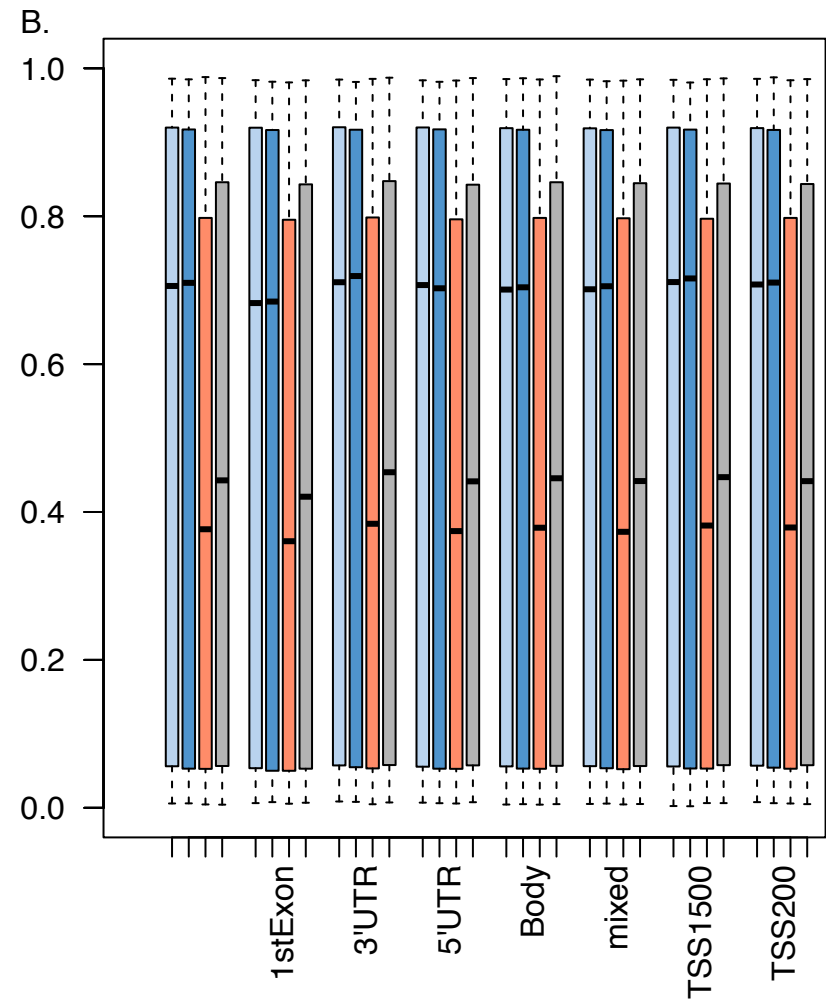

■ Chimpanzee iPSCs  
■ Chimpanzee fibroblasts  
■ Human iPSCs  
■ Human precursors (fibs + LCLs)

Supplement: supp [file elife-07103-supp-v1.zip]

Hoechst/AFP/FOXA2

Hoechst/SMA

Hoechst/MAP2

C1

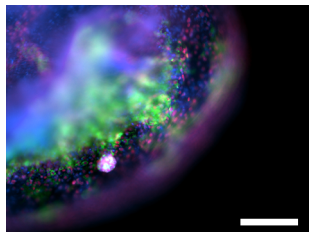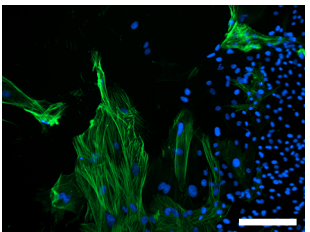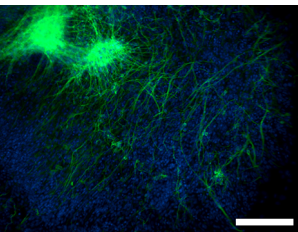

C2

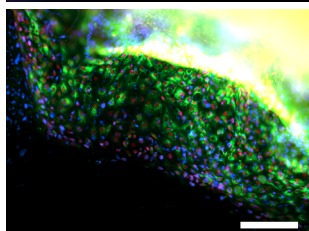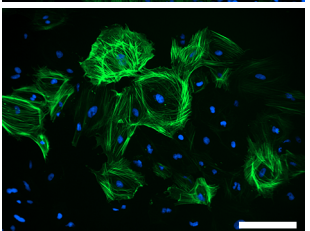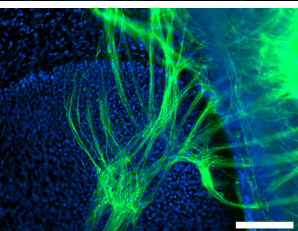

C3

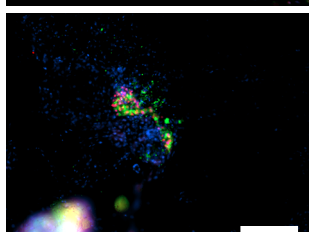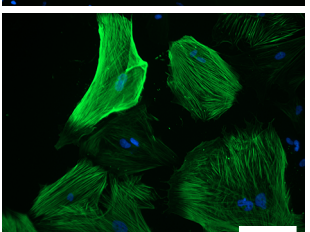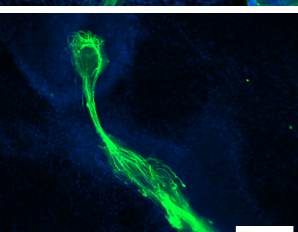

C5

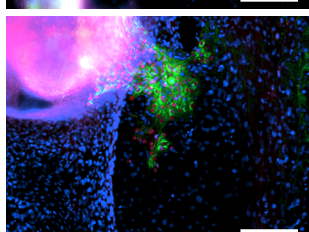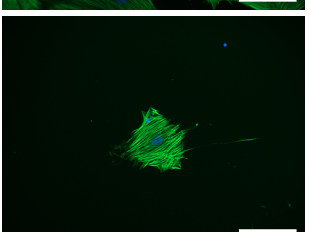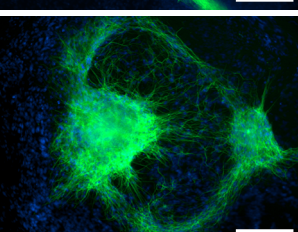

C6

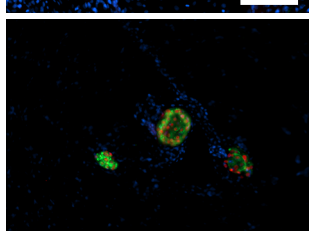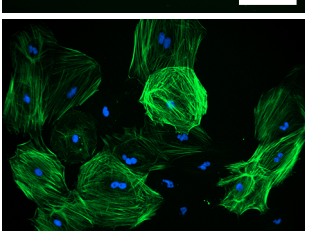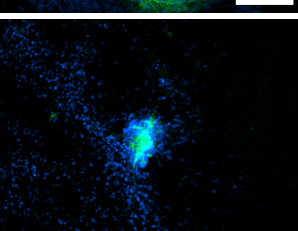

C7

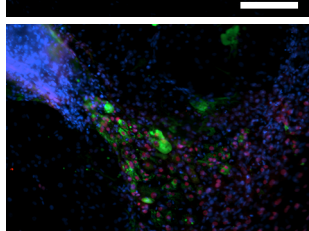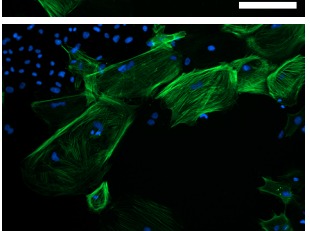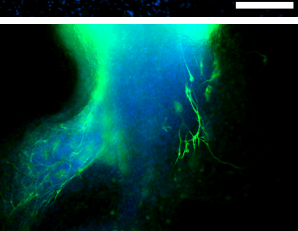

Supplement: supp [file elife-07103-supp-v1.zip]

Color Key

and Histogram

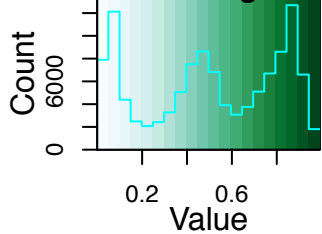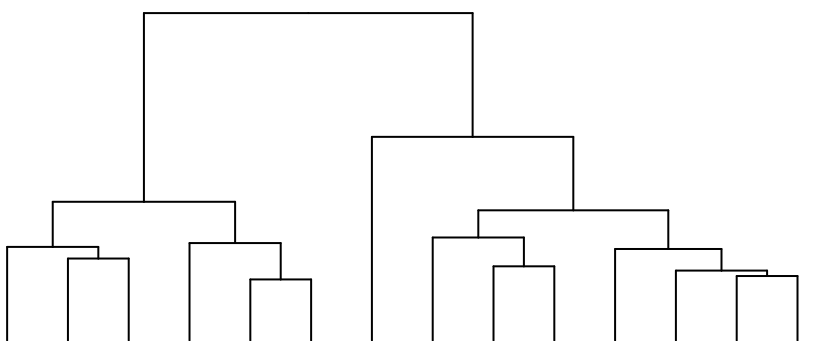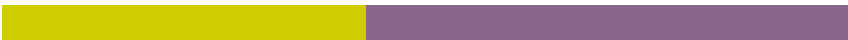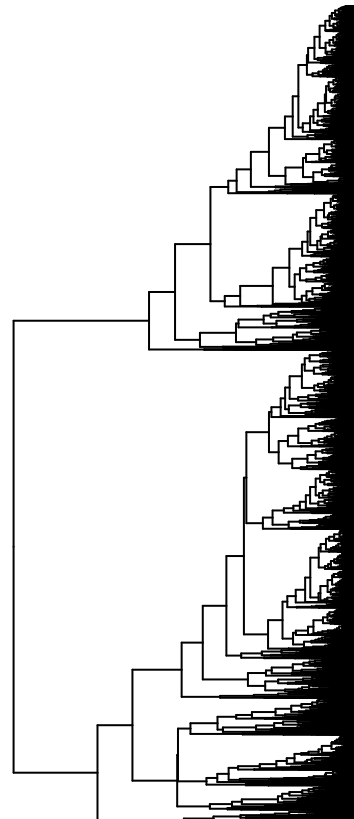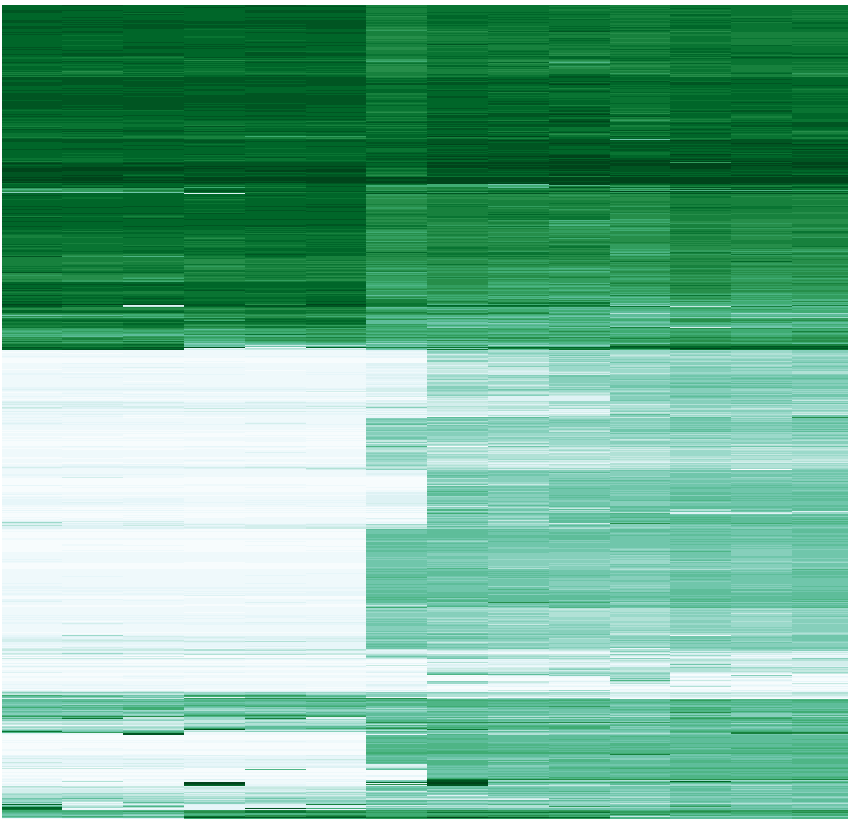

C4 C5 C2 H2 H4 H6 H3 H1 H7 H5 C3 C1 C7 C6

Supplement: supp [file elife-07103-supp-v1.zip]

XIST expression:  $p = 0.001$

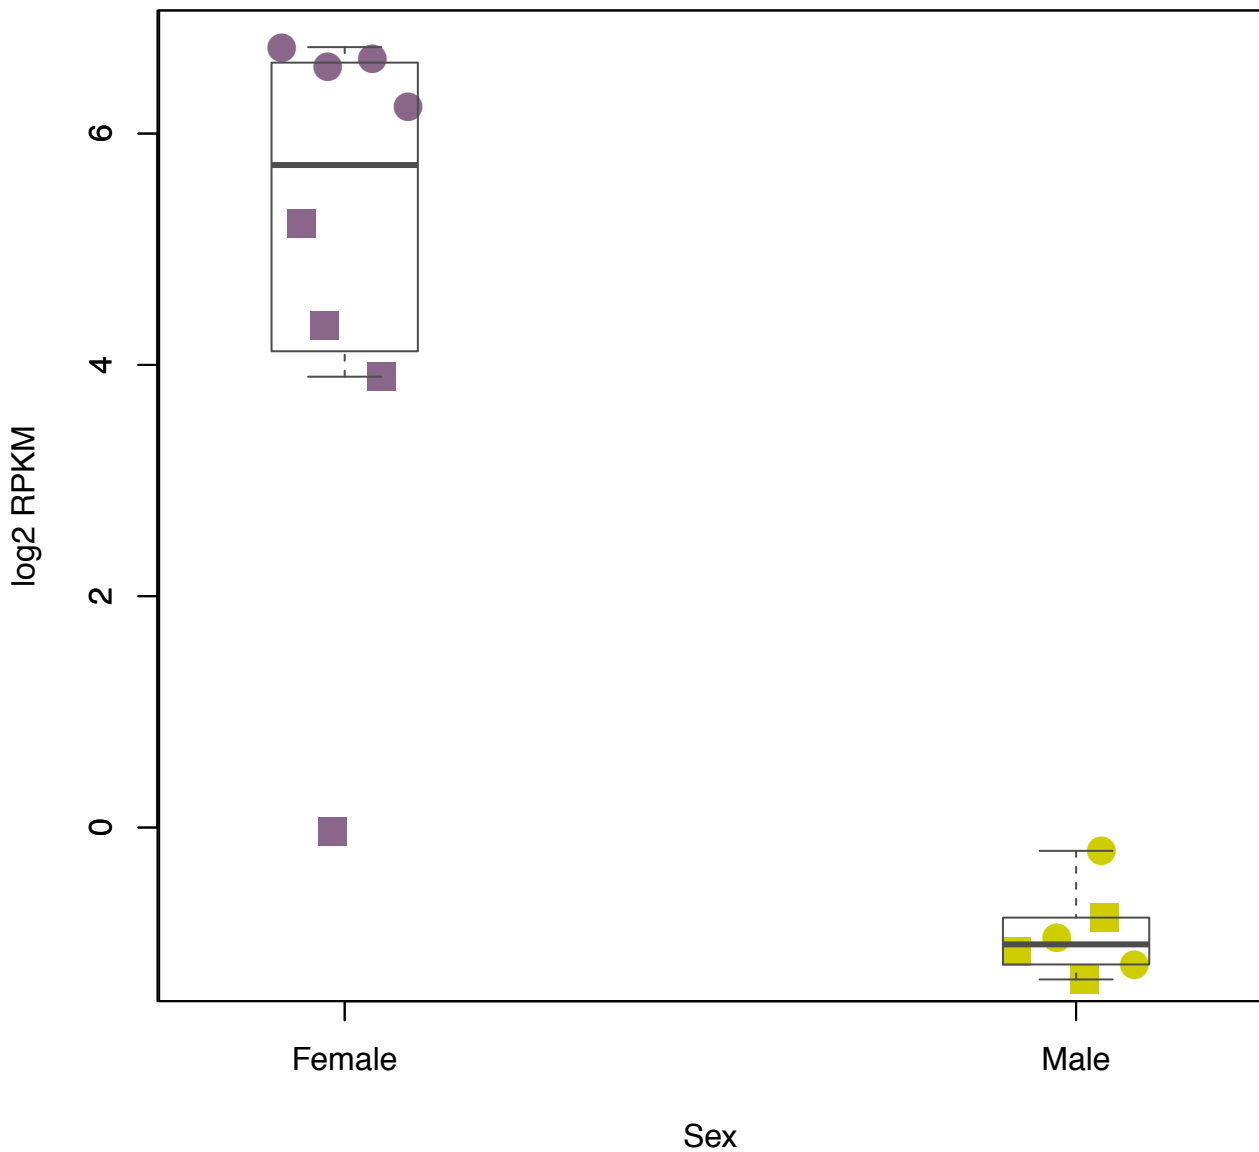

Supplement: supp [file elife-07103-supp-v1.zip]

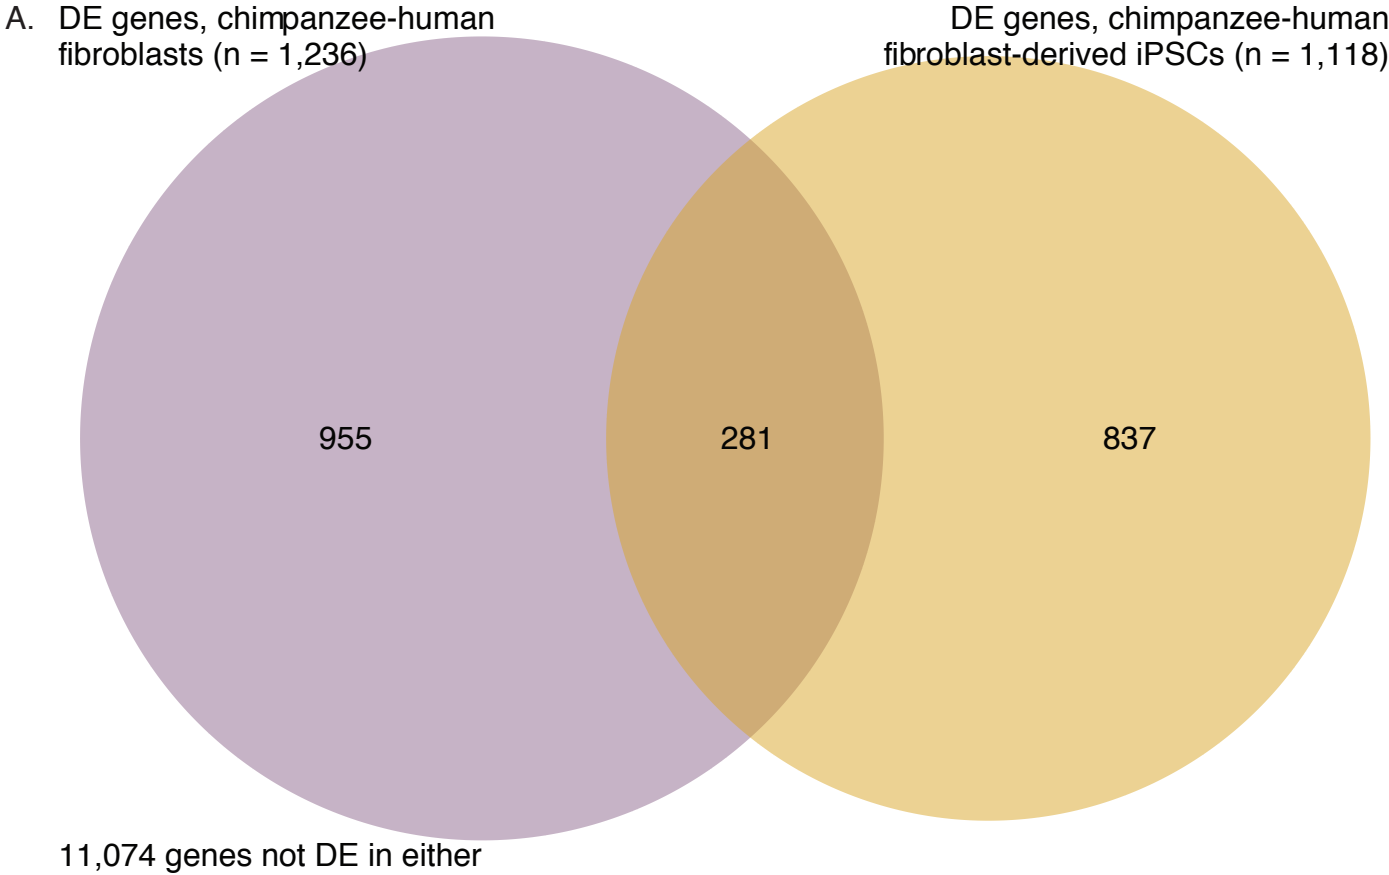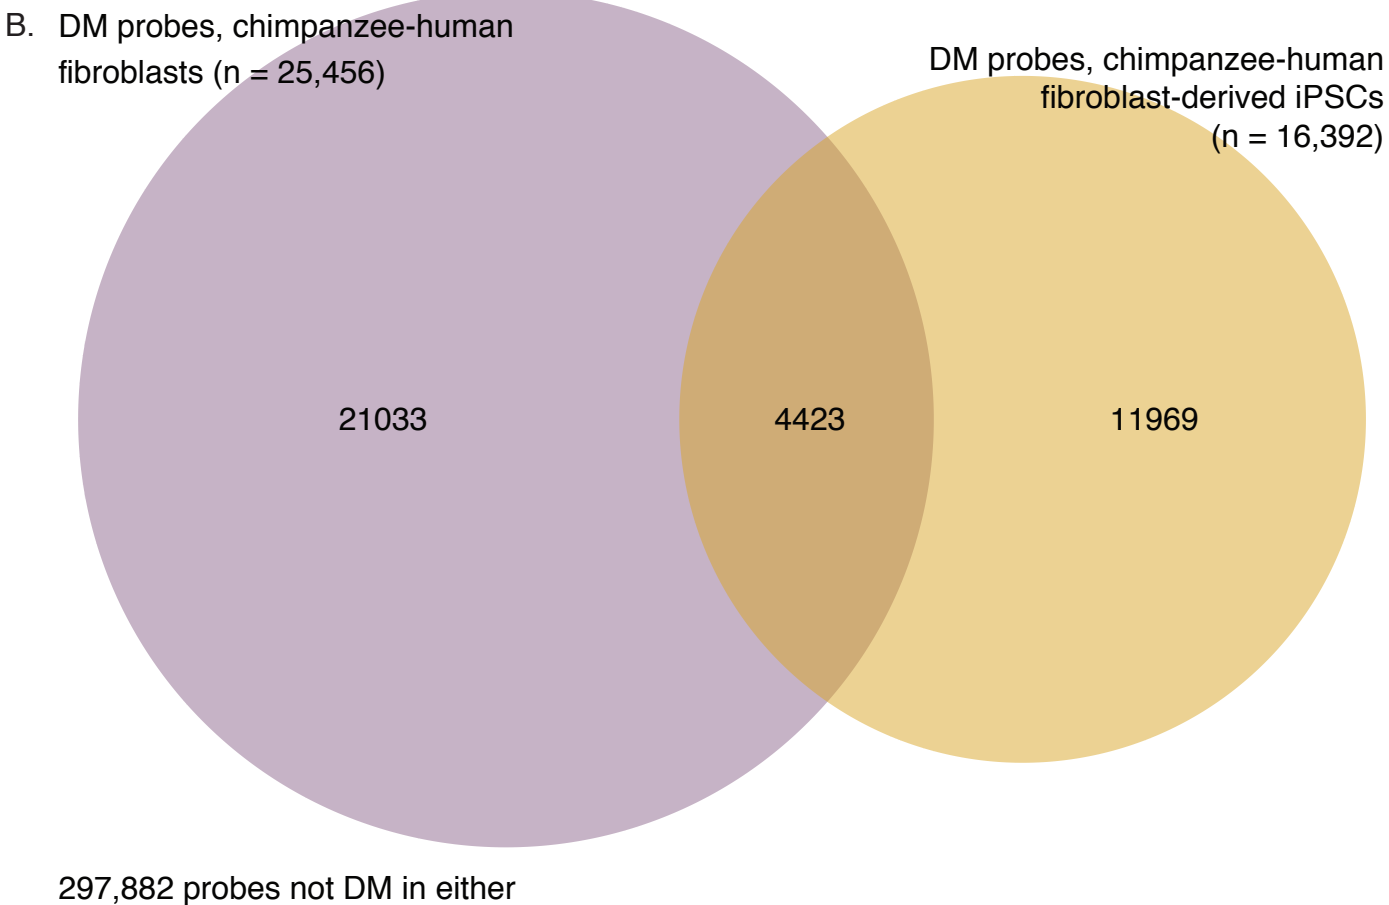

Supplement: supp [file elife-07103-supp-v1.zip]

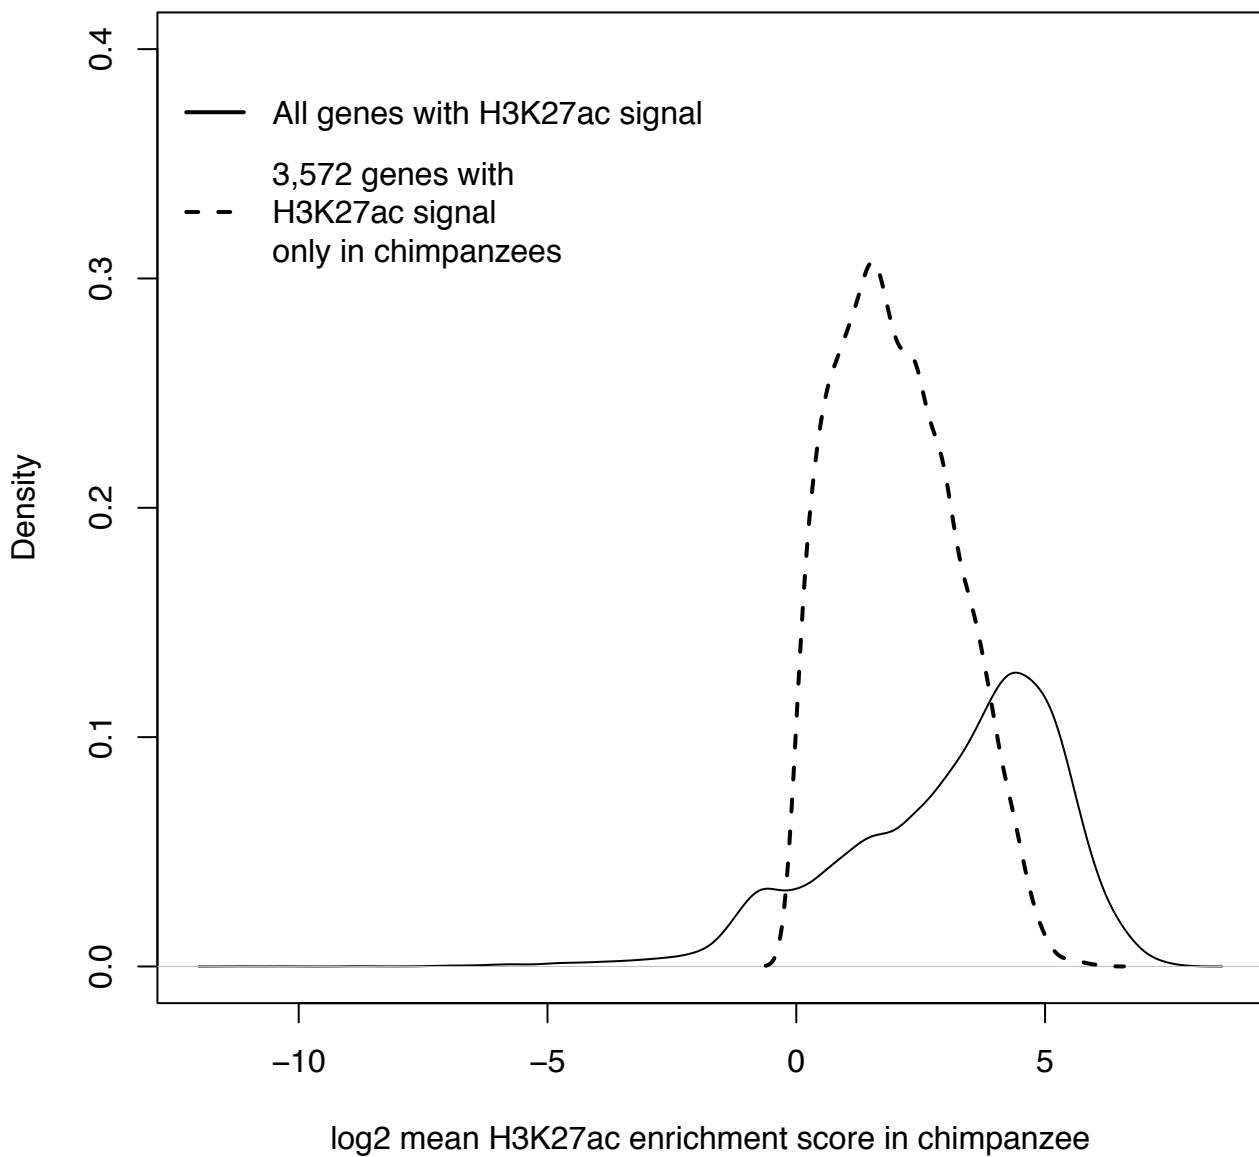

Supplement: supp [file elife-07103-supp-v1.zip]

Melt Curve Plot - Day 8 Transfected Transgene + Control

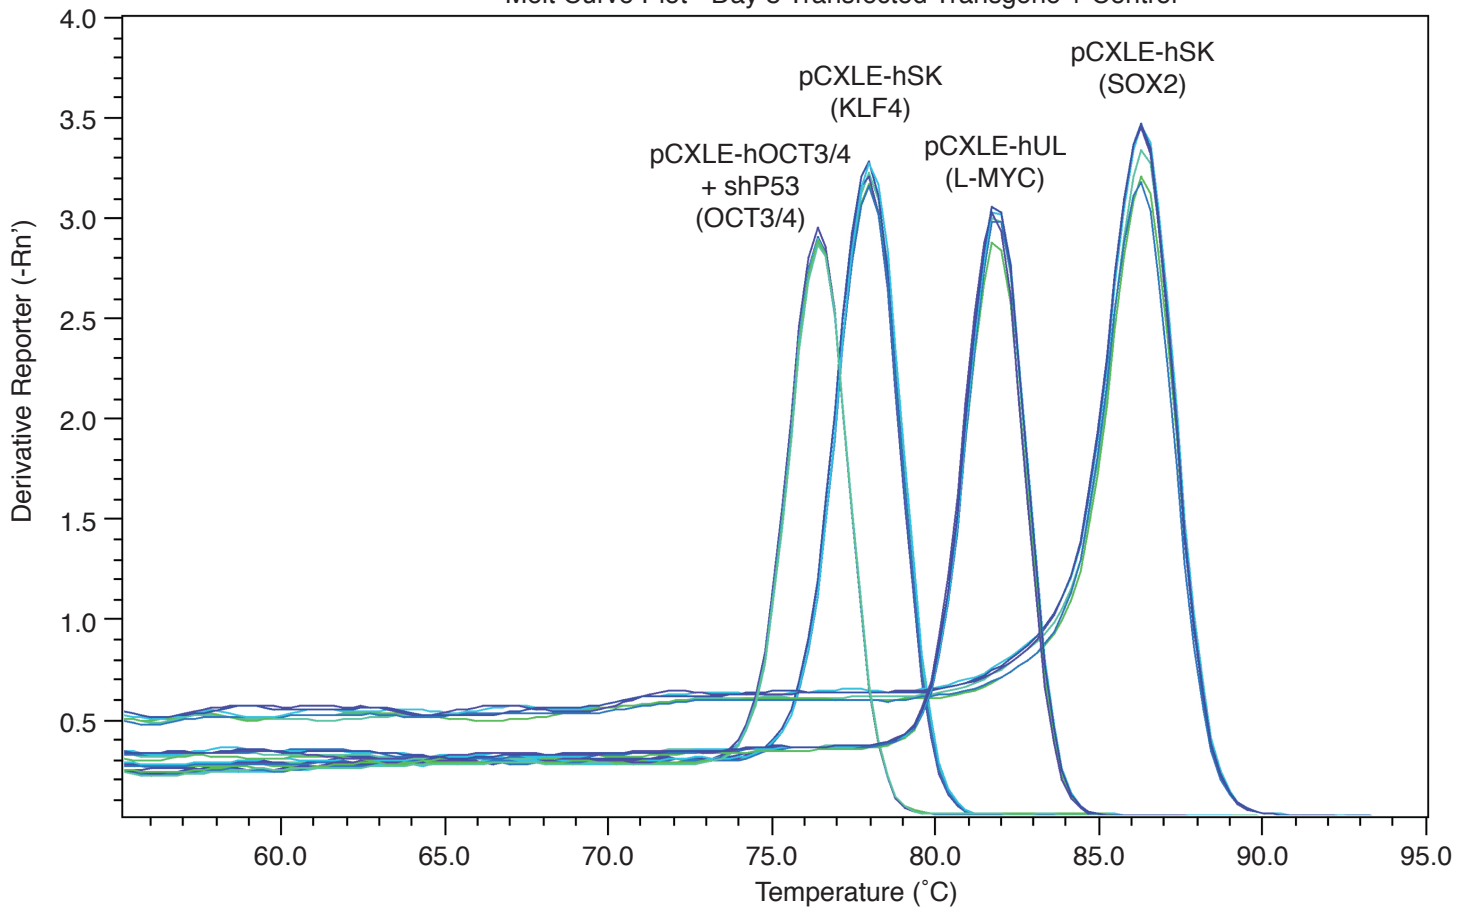

Melt Curve Plot - All iPSC Lines

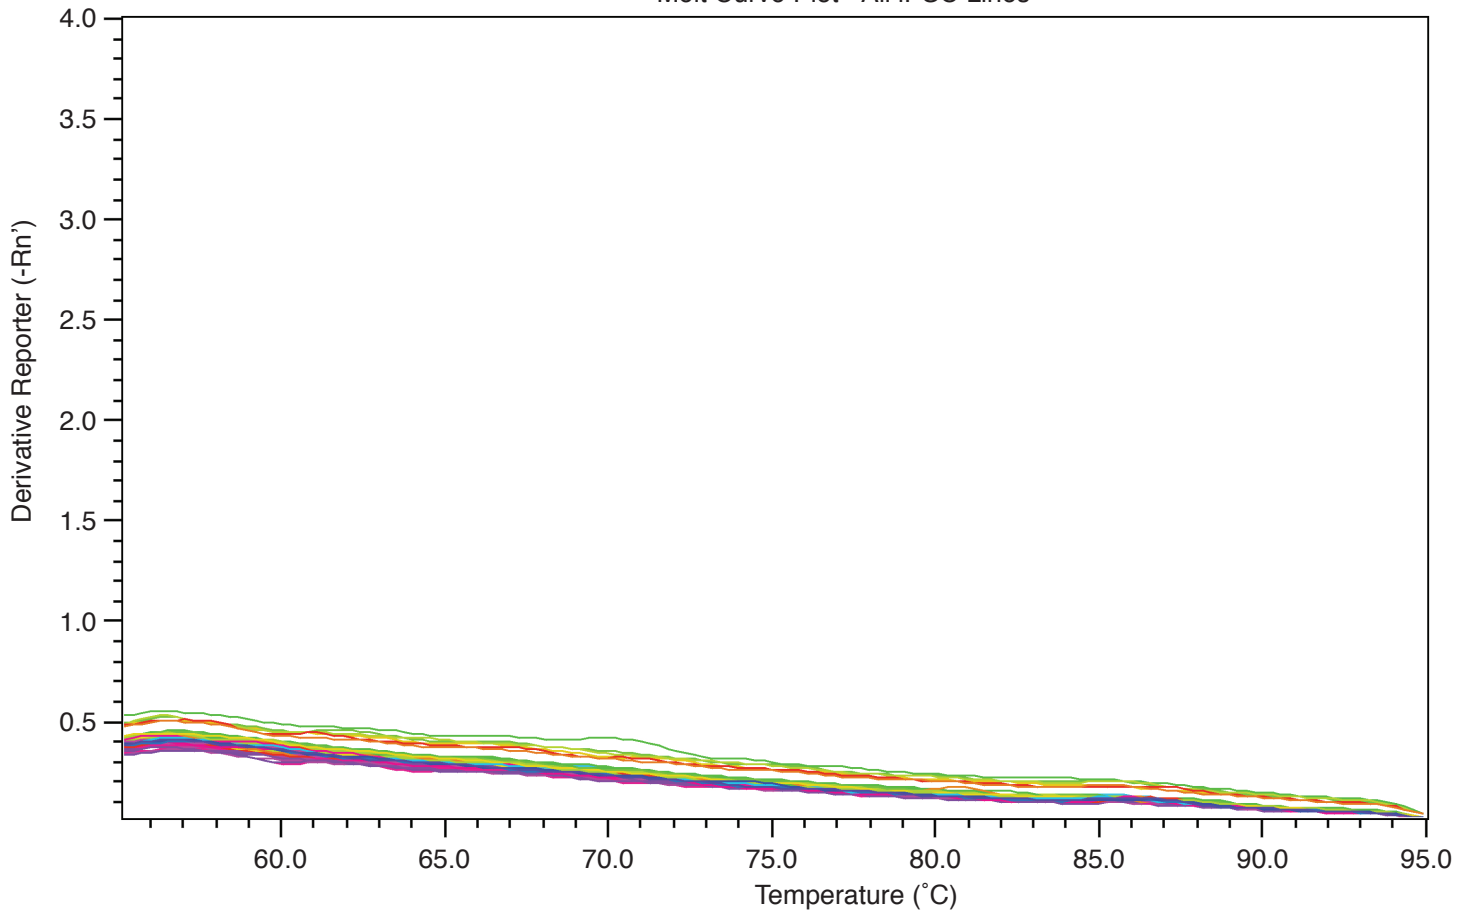

Supplement: supp [file elife-07103-supp-v1.zip]

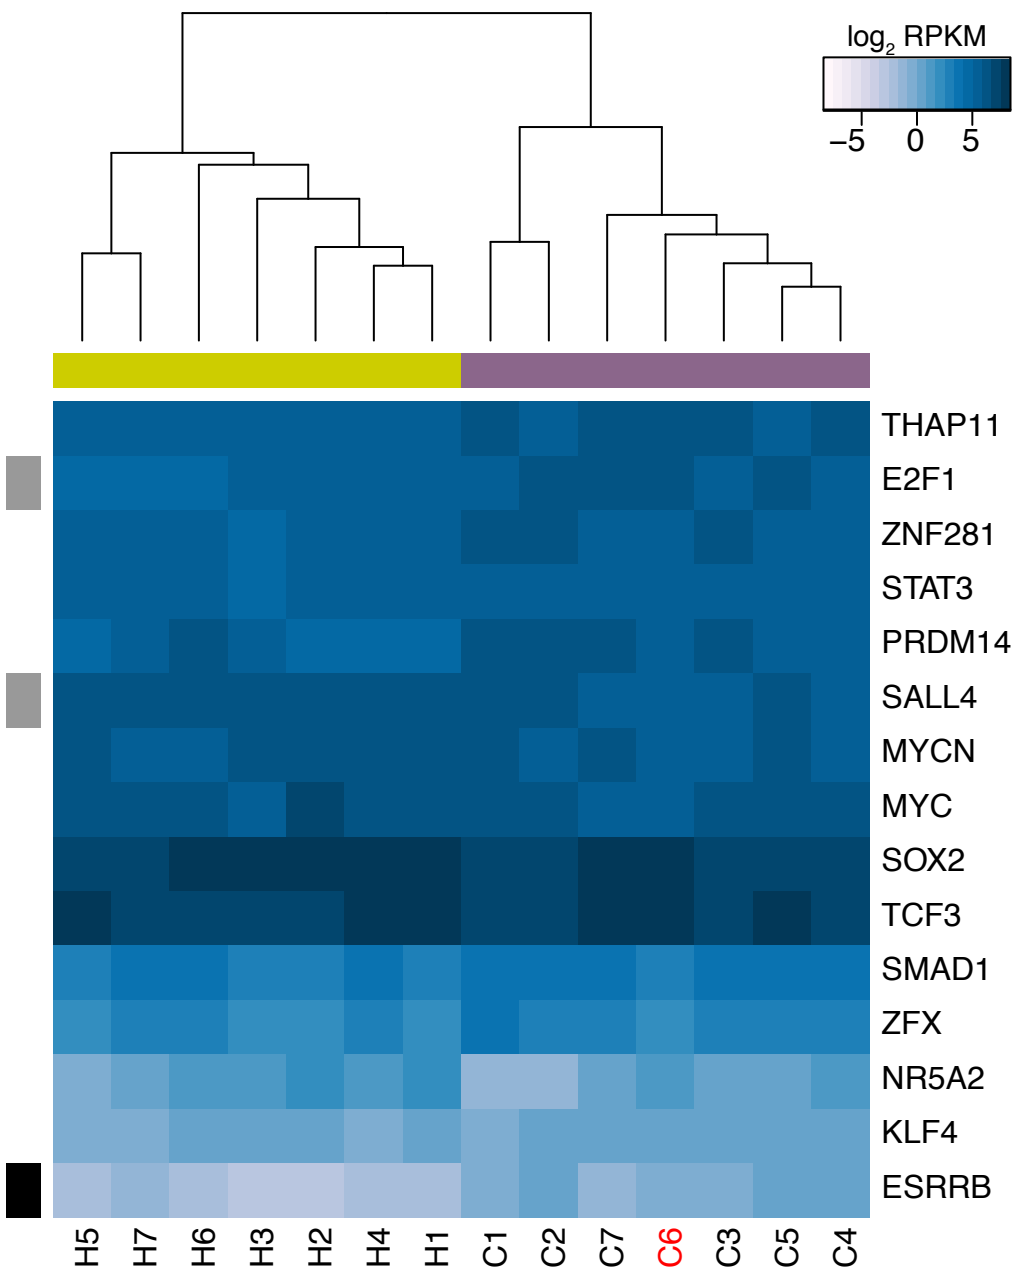

Supplement: supp [file elife-07103-supp-v1.zip]

Hoechst/OCT4

Hoechst/SSEA4/SOX2

Hoechst/Tra-1-81/NANOG

C1

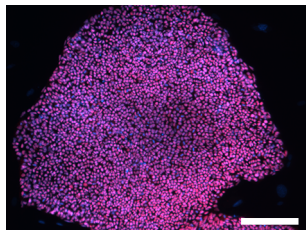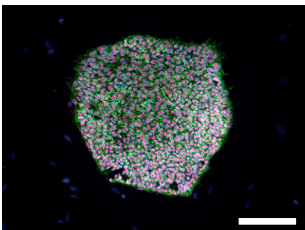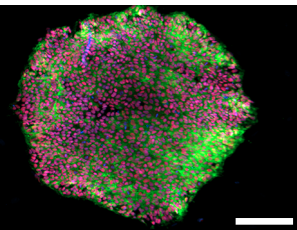

C2

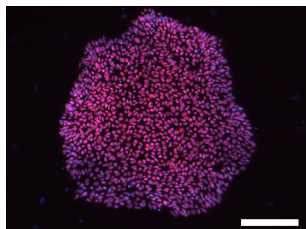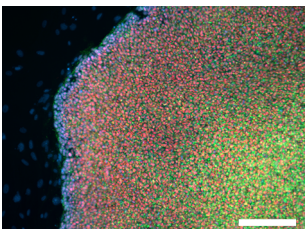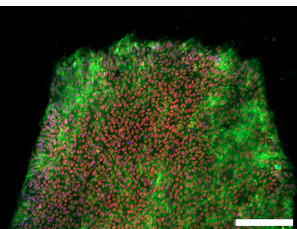

C3

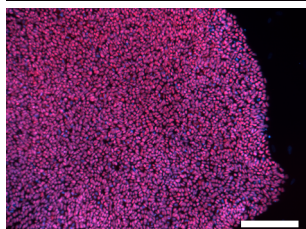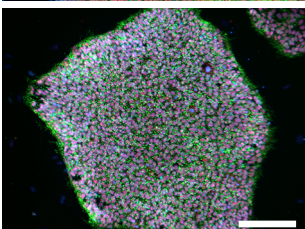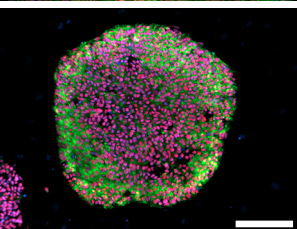

C5

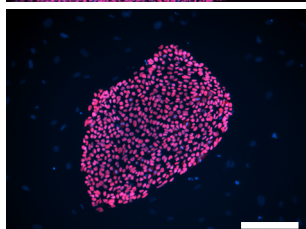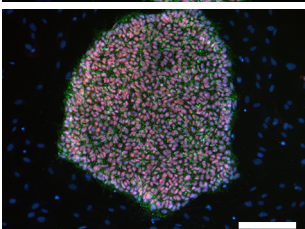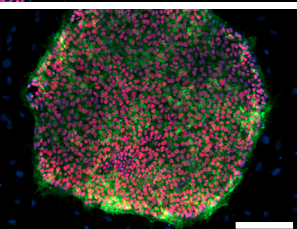

C6

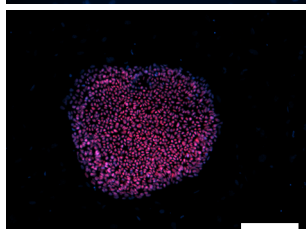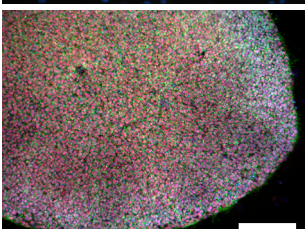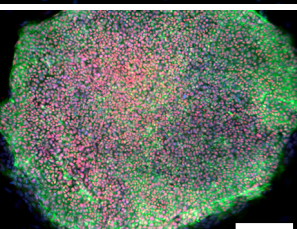

C7

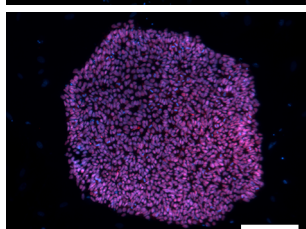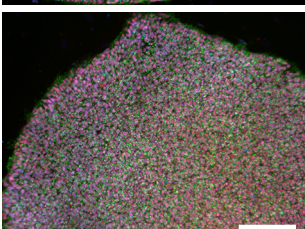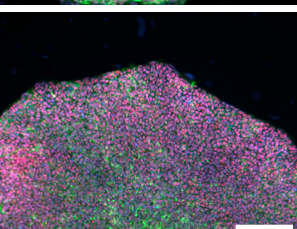

Supplement: supp [file elife-07103-supp-v1.zip]

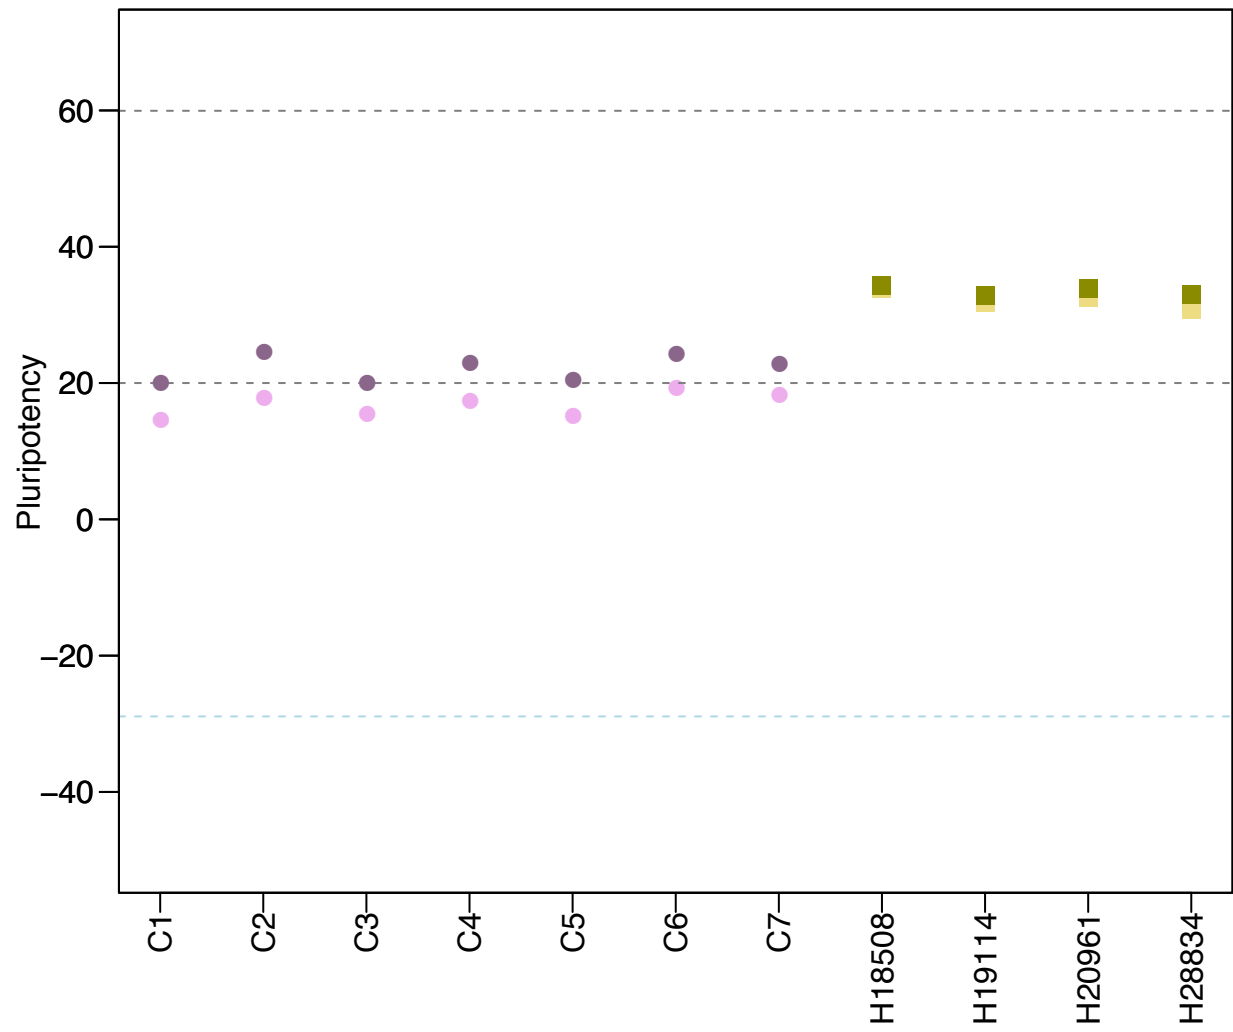

Supplement: supp [file elife-07103-supp-v1.zip]

Normalised beta value

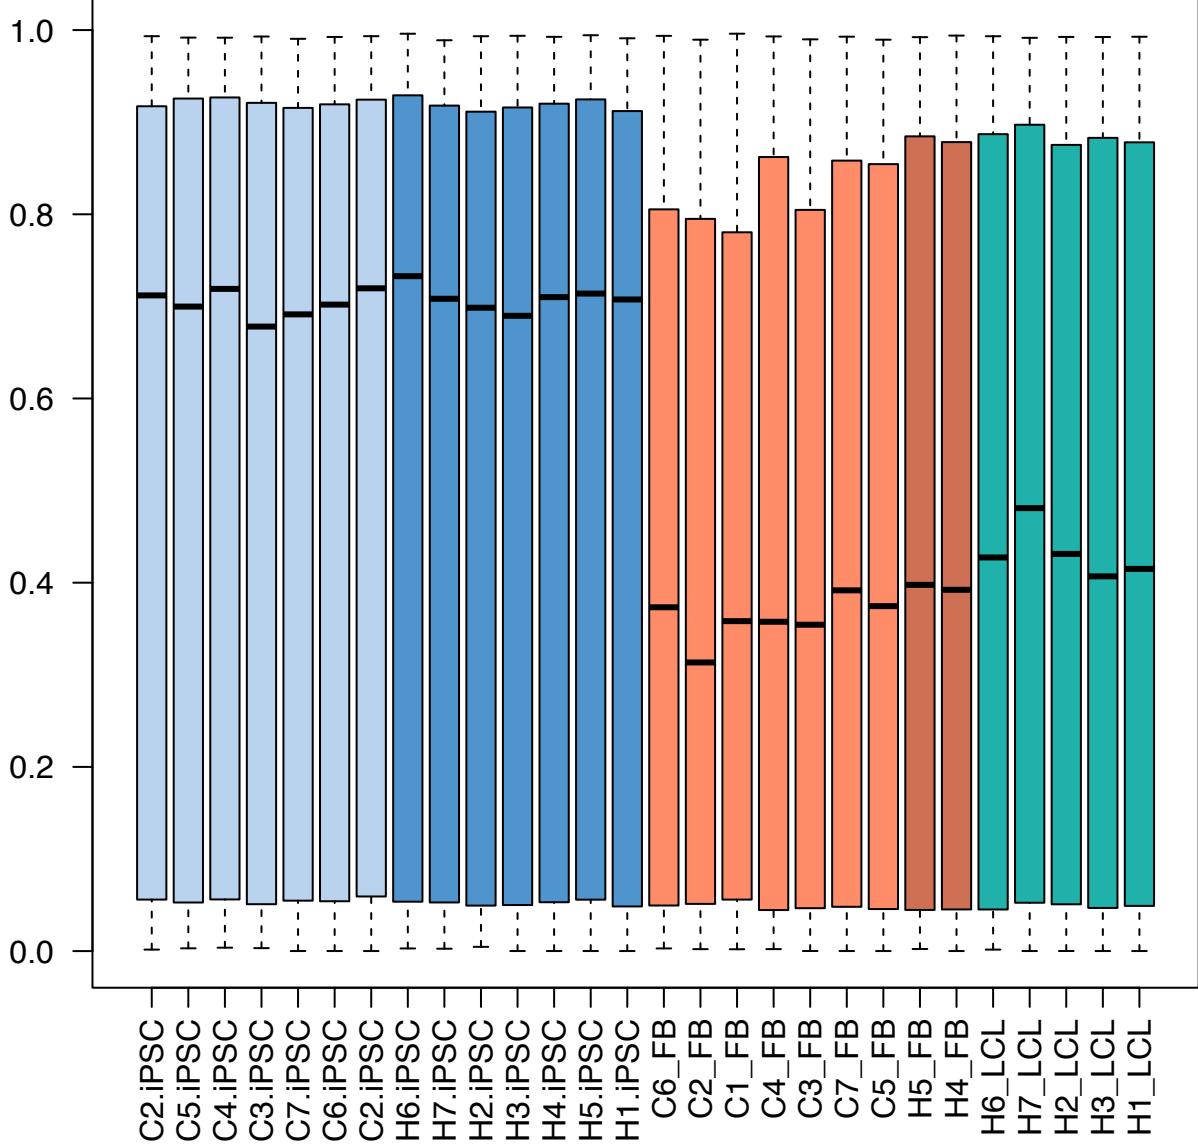

Supplement: supp [file elife-07103-supp-v1.zip]

C1 P15+5

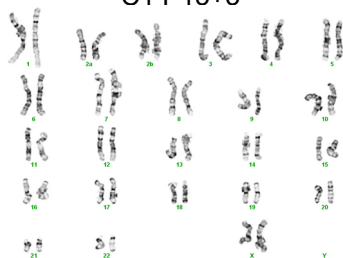

C2 P15+6

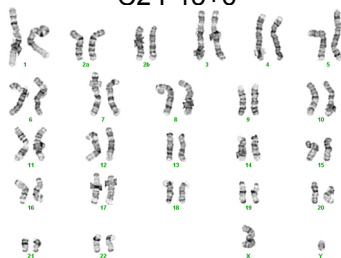

C3 P12+5

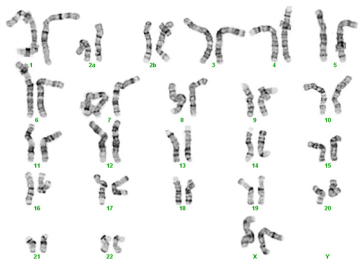

C5 P19+5

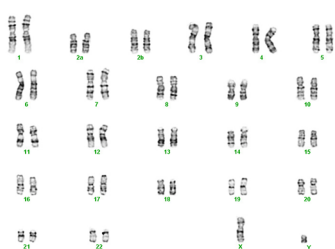

C6 P20+5

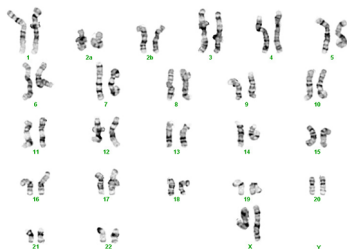

C7 P14+5

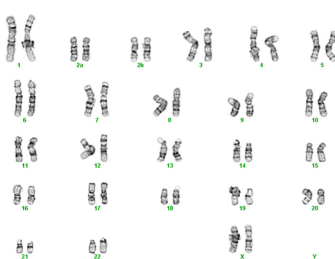

Supplement: supp [file elife-07103-supp-v1.zip]

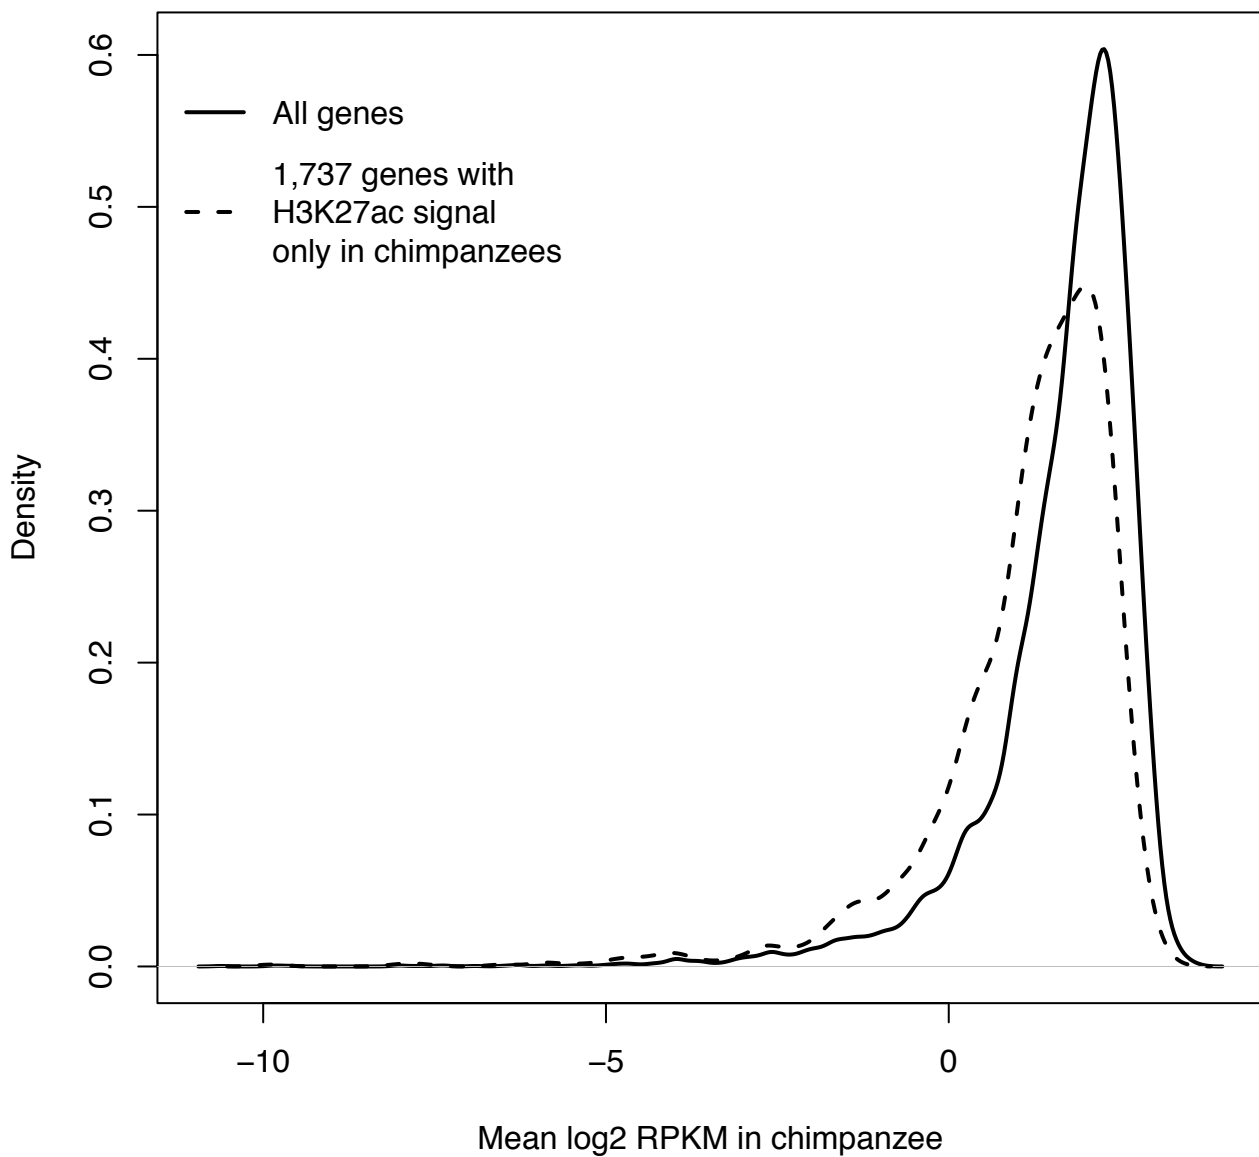

Supplement: supp [file elife-07103-supp-v1.zip]

Endoderm

Mesoderm

Ectoderm

C6

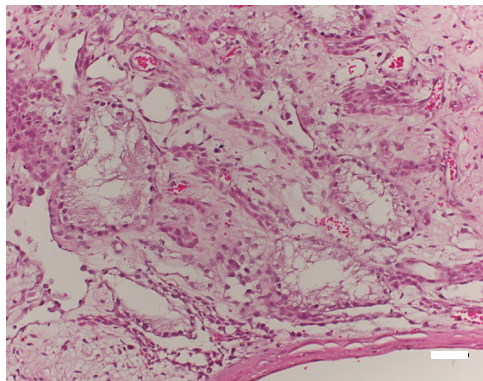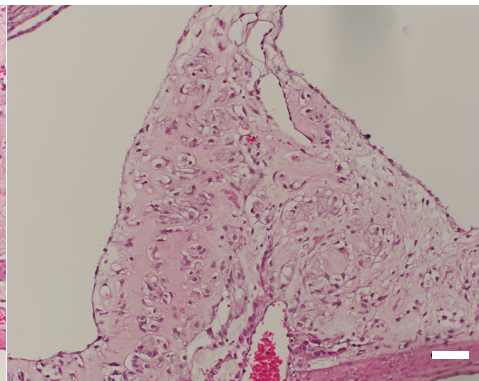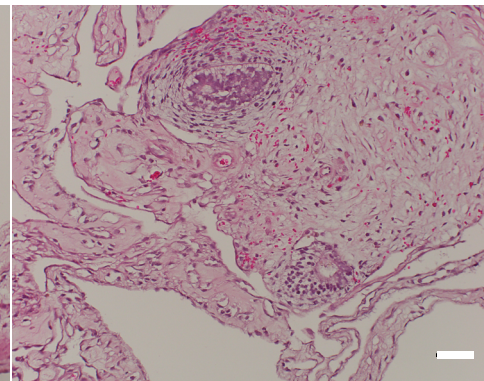

C2

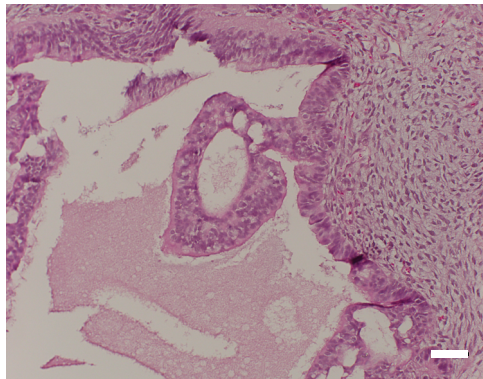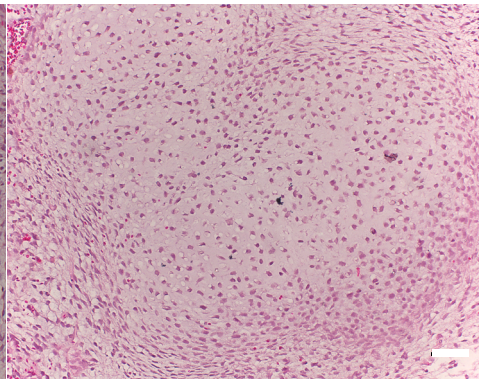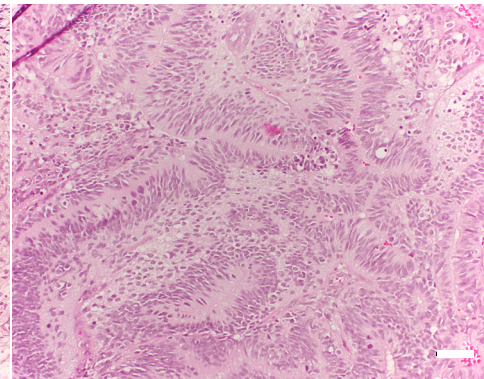

C5

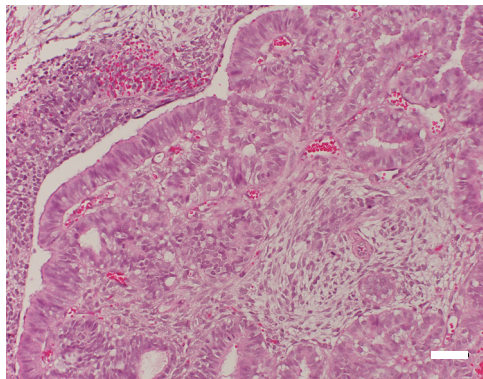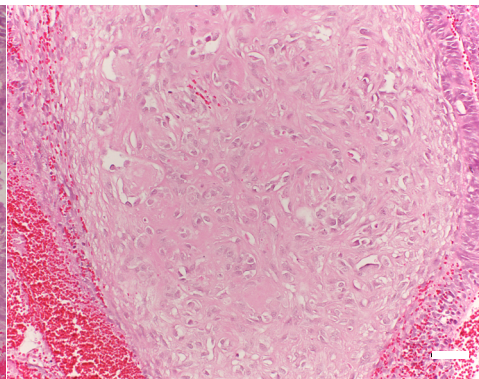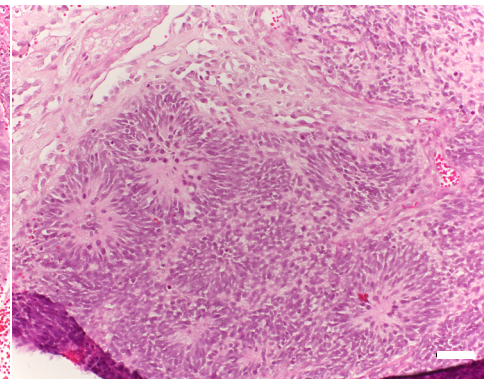

Supplement: supp [file elife-07103-supp-v1.zip]

## DE genes by log2 FC

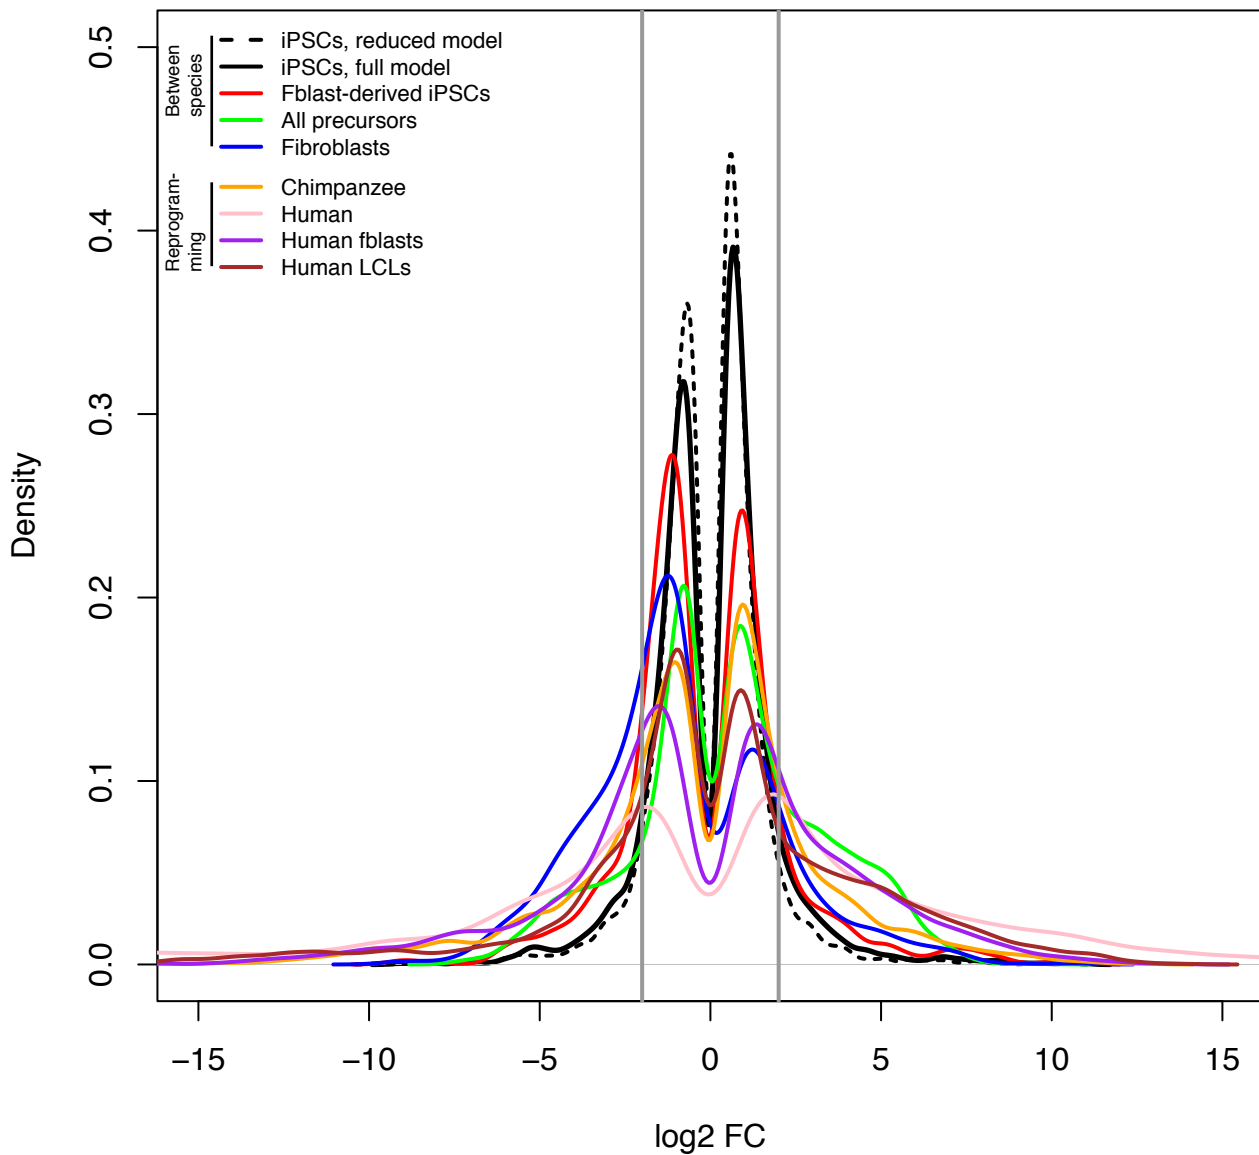

Supplement: supp [file elife-07103-supp-v1.zip]

Hoechst/Albumin

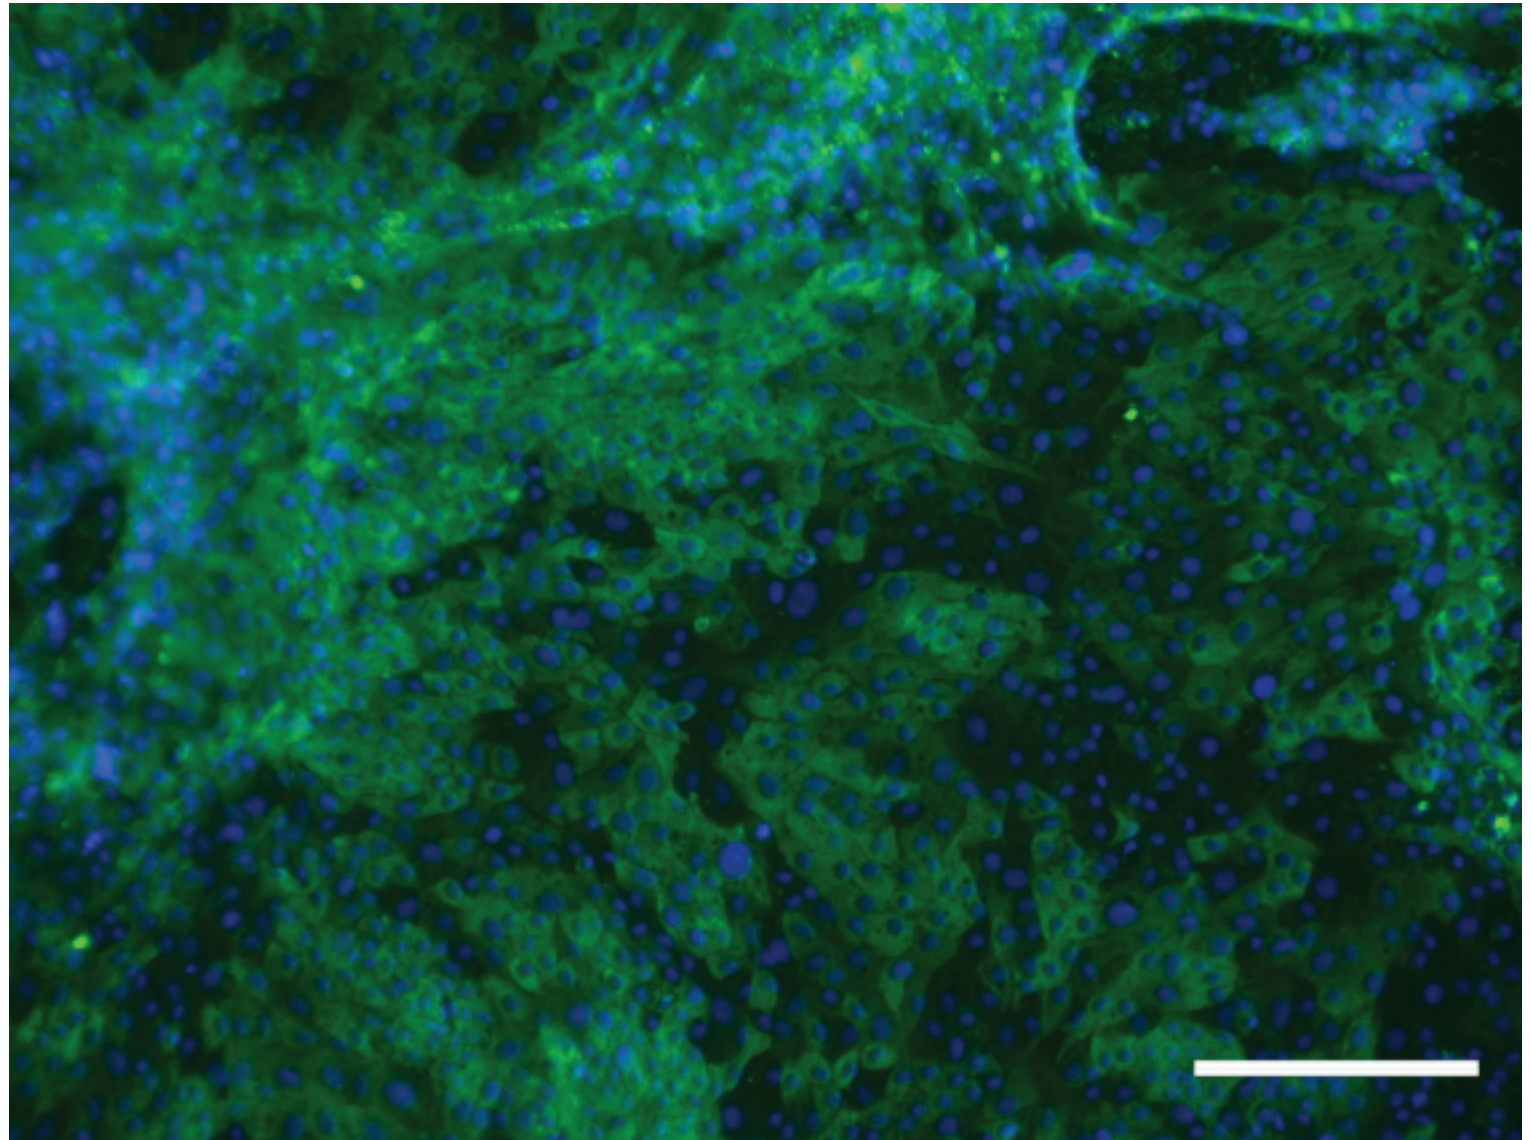

C2

Supplement: supp [file elife-07103-supp-v1.zip]

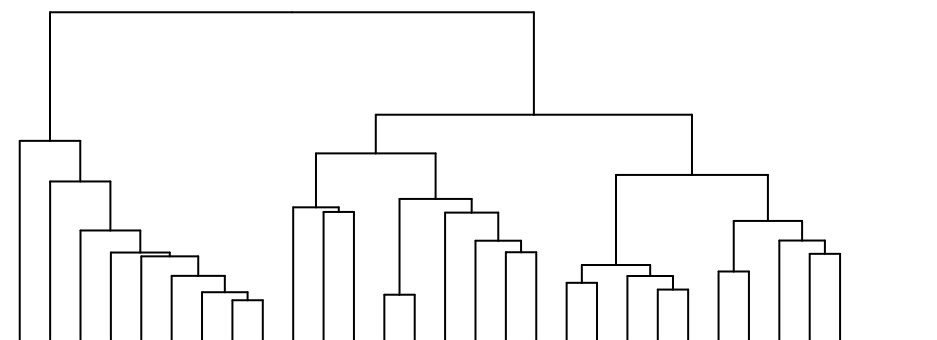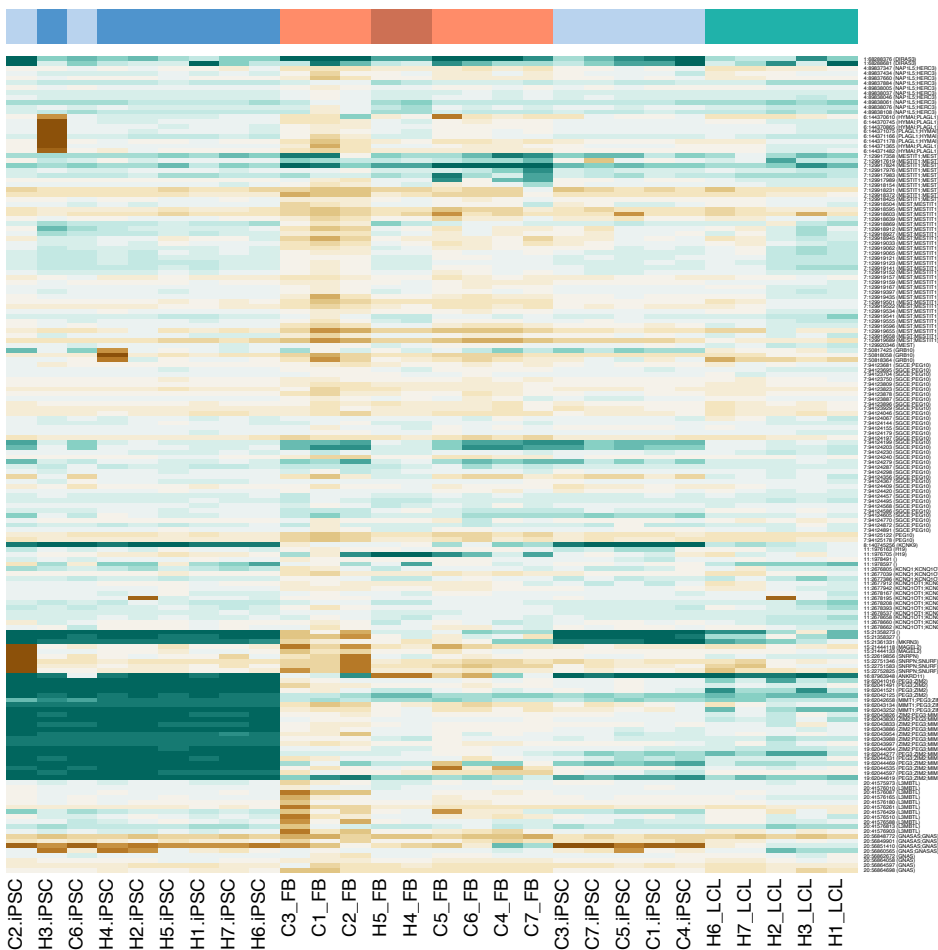

Supplement: supp [file elife-07103-supp-v1.zip]

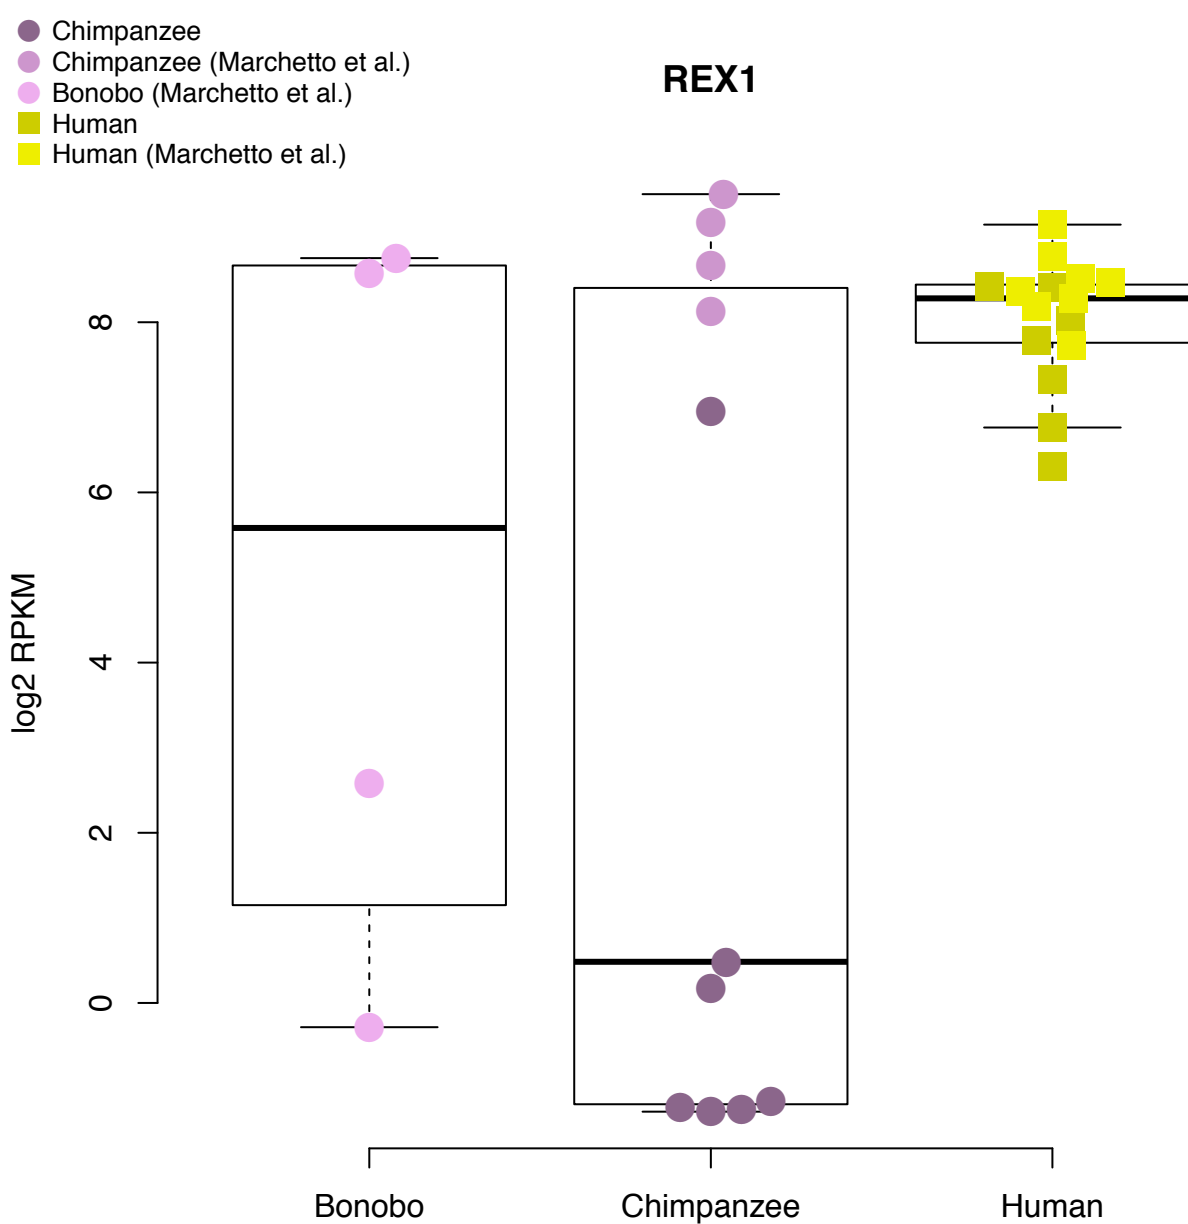

Supplement: supp [file elife-07103-supp-v1.zip]

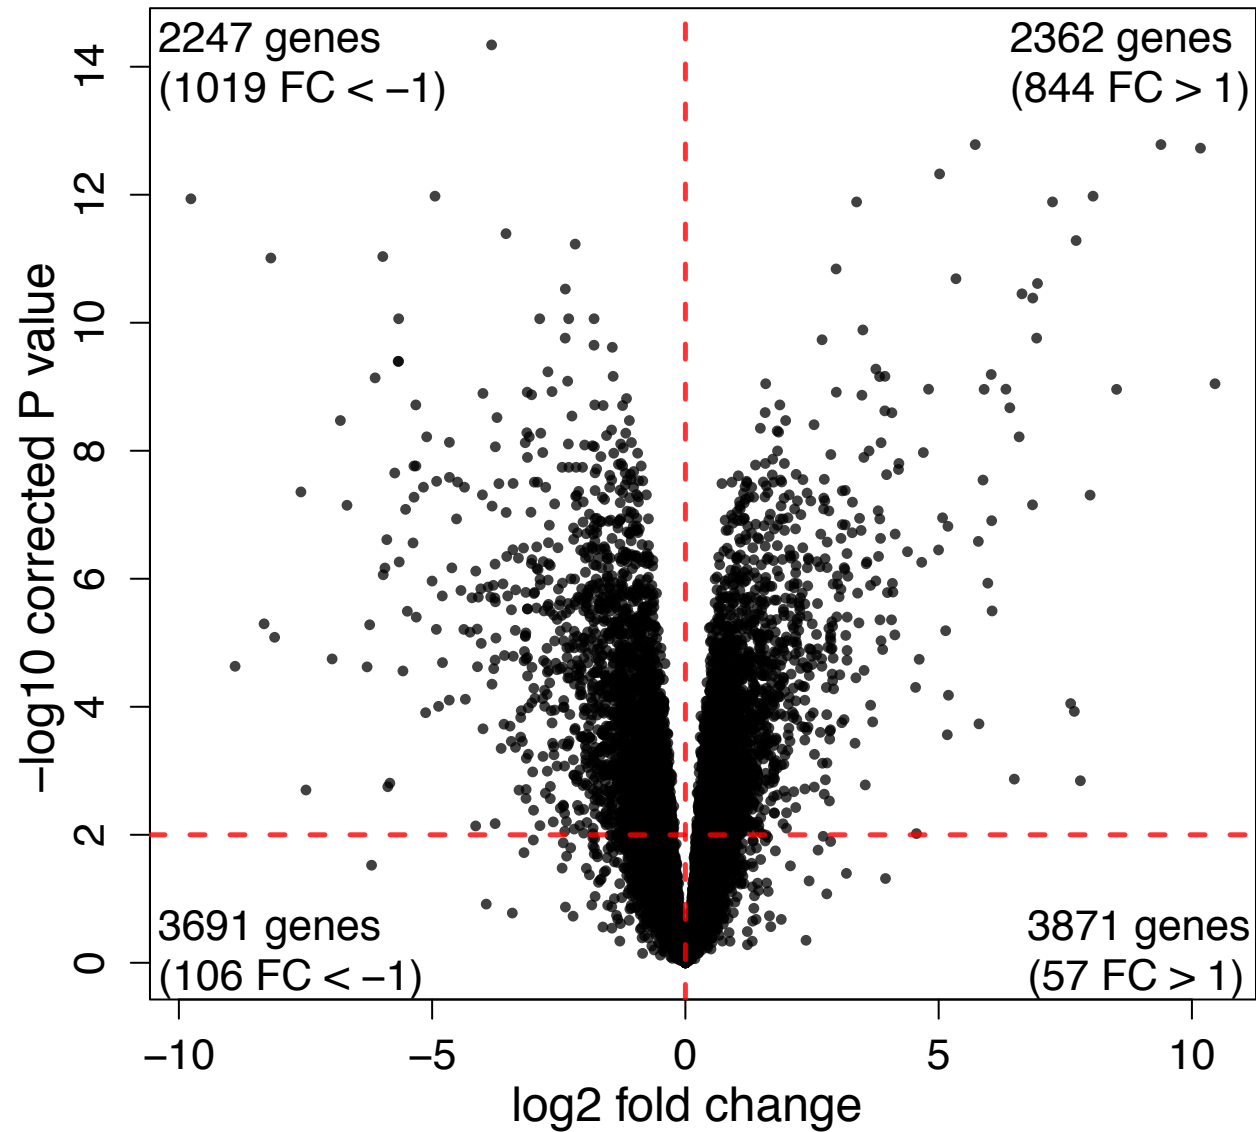

Supplement: supp [file elife-07103-supp-v1.zip › elife_poa_e07103_Figure_4_figure_supplement_1.pdf]

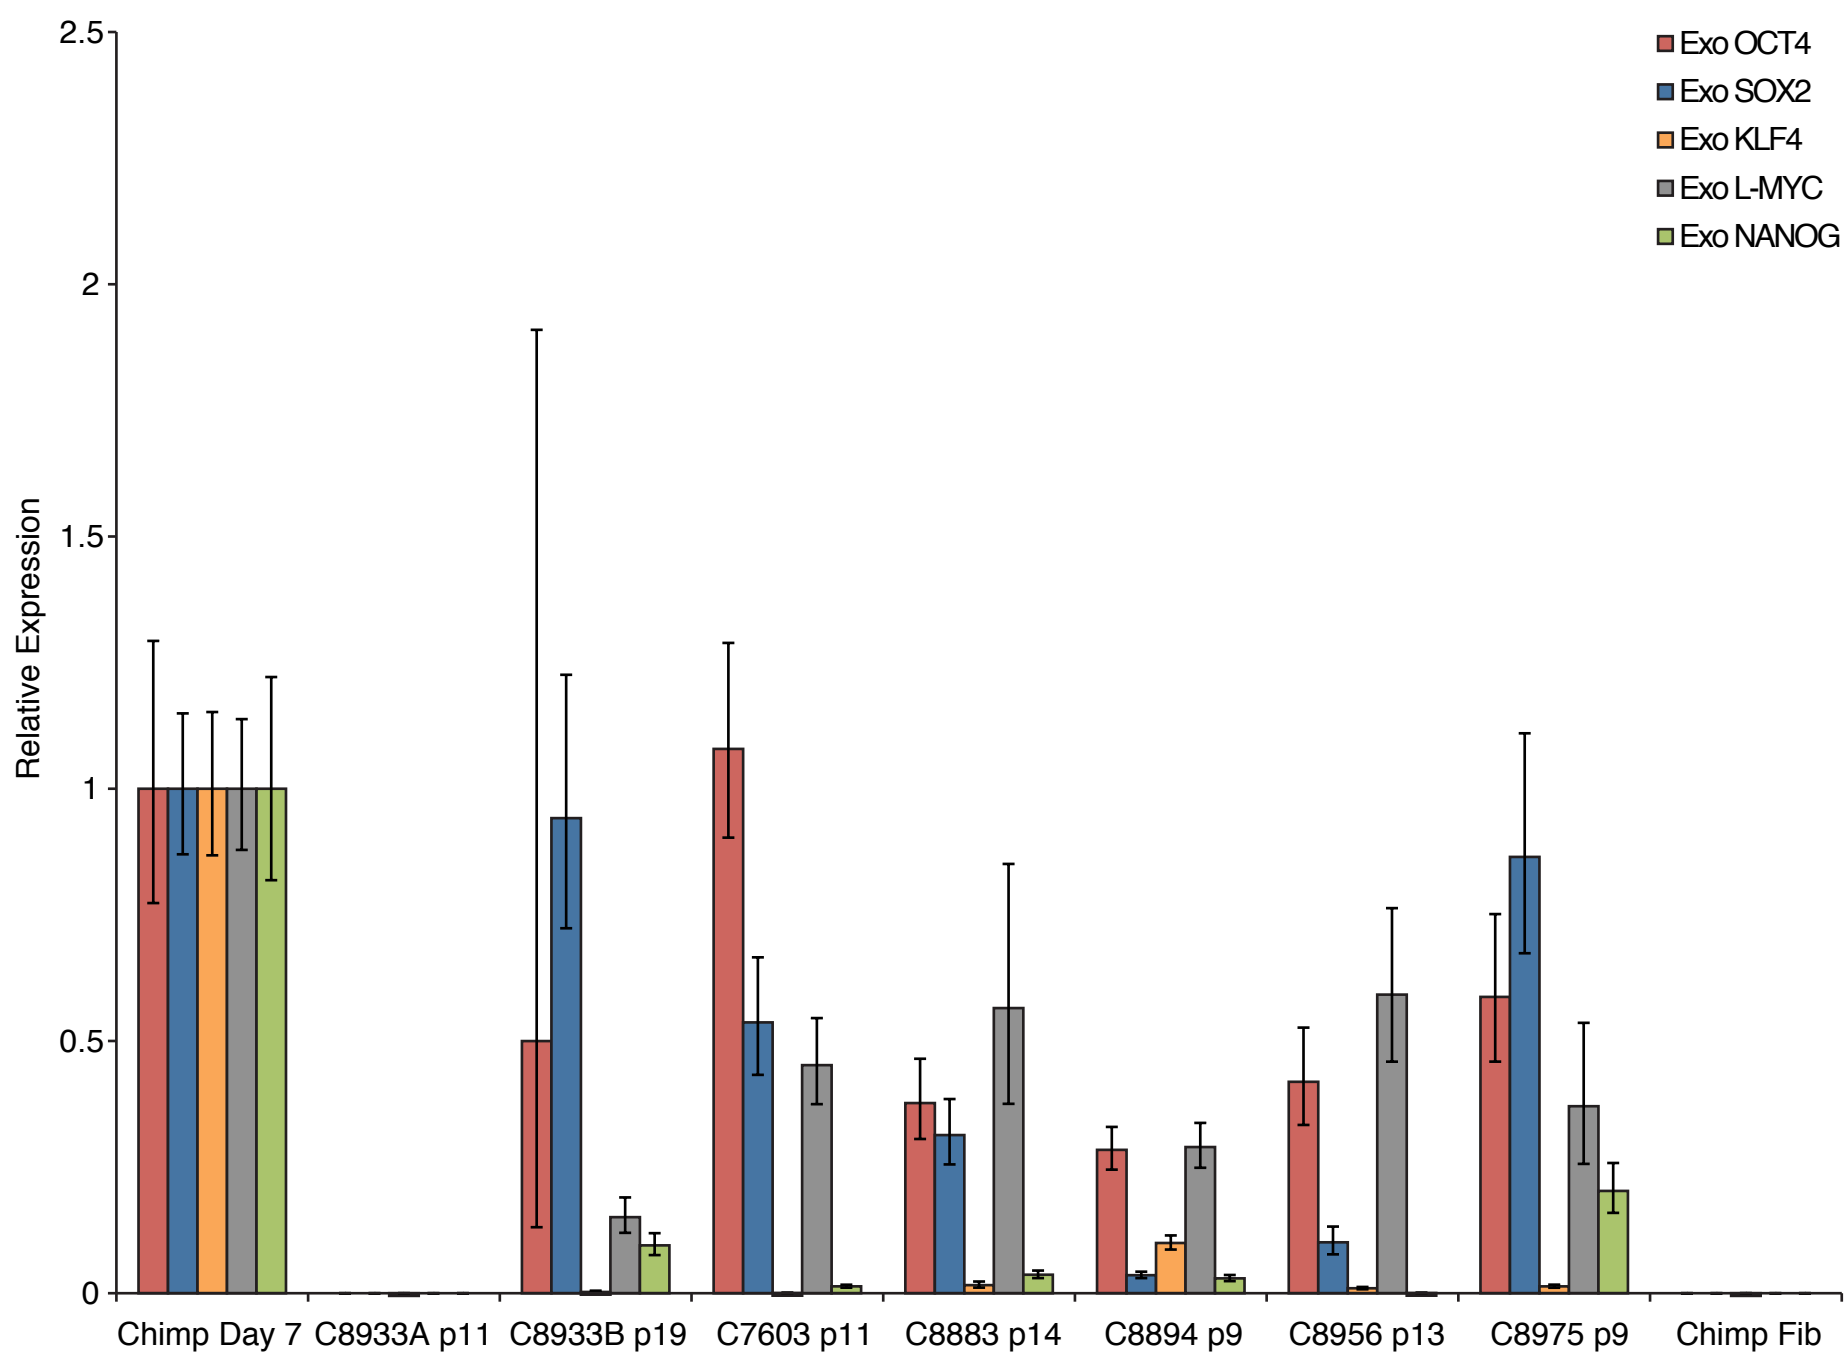

Supplement: supp [file elife-07103-supp-v1.zip › elife_poa_e07103_Figure_1_figure_supplement_5.pdf]

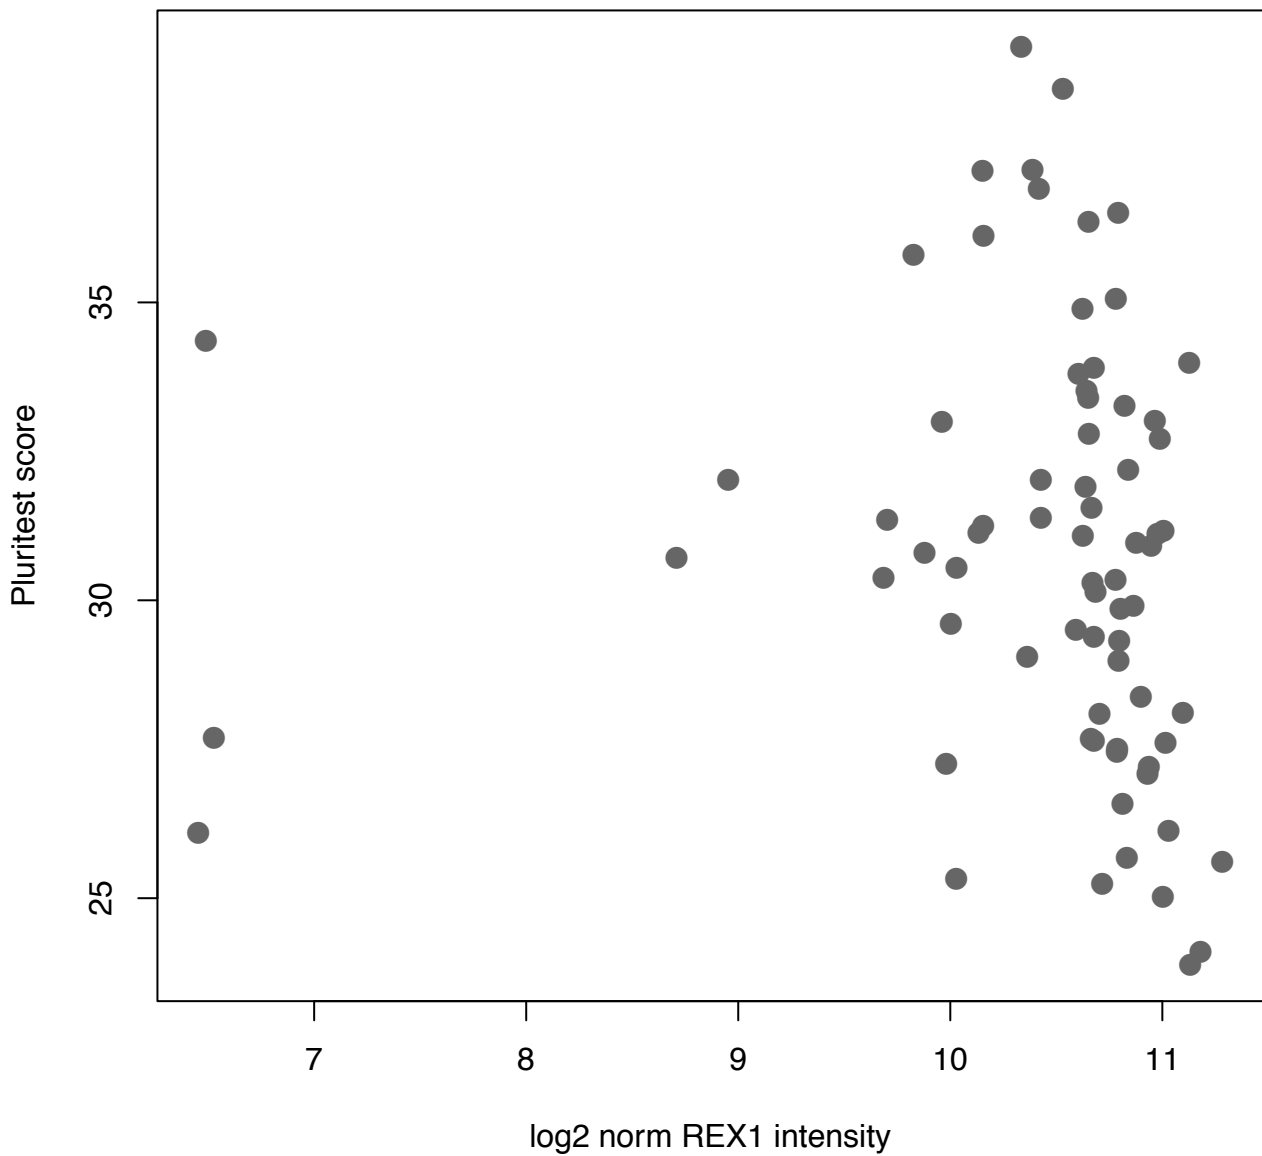

Supplement: supp [file elife-07103-supp-v1.zip › elife_poa_e07103_Figure_6_figure_supplement_3.pdf]

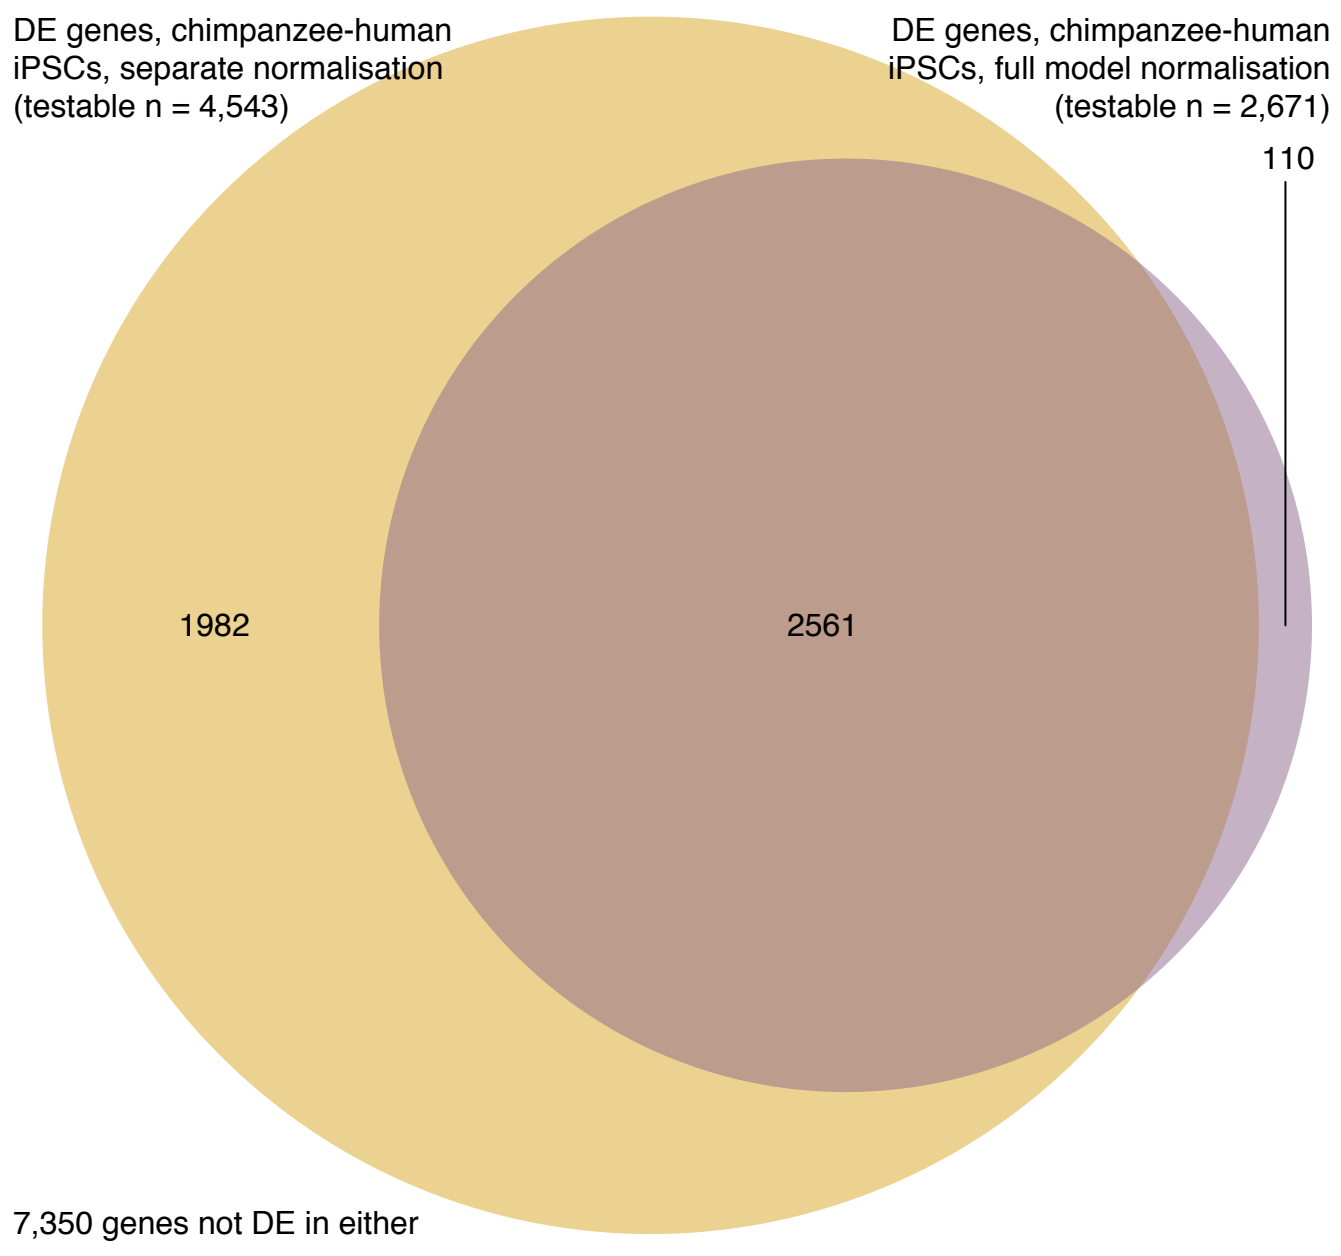

Supplement: supp [file elife-07103-supp-v1.zip › elife_poa_e07103_Figure_7_figure_supplement_4.pdf]
